# Supplementary material for: Genome Assembly and Sex-Determining Region of Male and Female Populus × sibirica
Source: Frontiers journal article supplement (doi:10.3389/fpls.2021.625416), 2021-09-08
Supplement: Data_Sheet_2.PDF [file Data_Sheet_2.PDF]

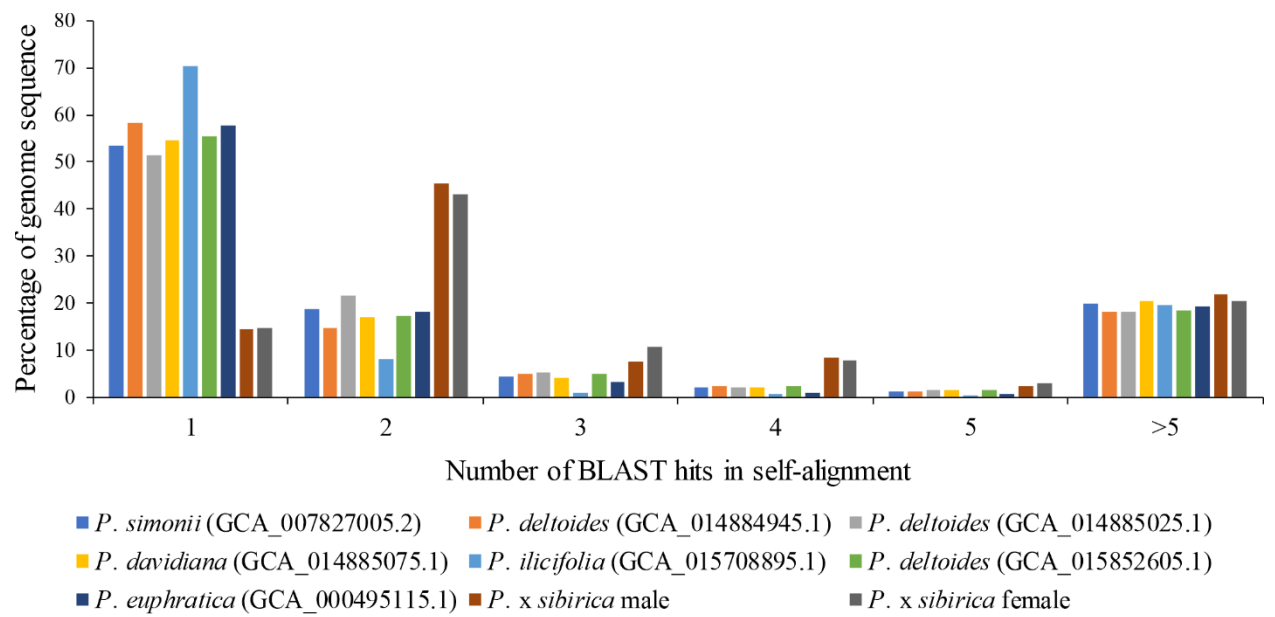

**Supplementary Data 2.** Self-alignment of the male and female *P. × sibirica* assemblies and genomes of other *Populus* species from the NCBI database.
