# Supplementary material for: Genome Assembly and Sex-Determining Region of Male and Female Populus × sibirica
Source: Frontiers journal article supplement (doi:10.3389/fpls.2021.625416), 2021-09-08
Supplement: Data_Sheet_3.ZIP [file Data_Sheet_3.ZIP]

**Supplementary Data 3.** Sequences of four contigs that contain SDR variants of the male (tig00001299 – Y haplotype, tig00000650 – X haplotype) and female (tig00001482 and tig00003220 – X haplotypes) *P. × sibirica*. The sequences are presented in separate files in the fasta format.
