# Supplementary material for: Genome Assembly and Sex-Determining Region of Male and Female Populus × sibirica
Source: Frontiers journal article supplement (doi:10.3389/fpls.2021.625416), 2021-09-08
Supplement: Data_Sheet_5.PDF [file Data_Sheet_5.PDF]

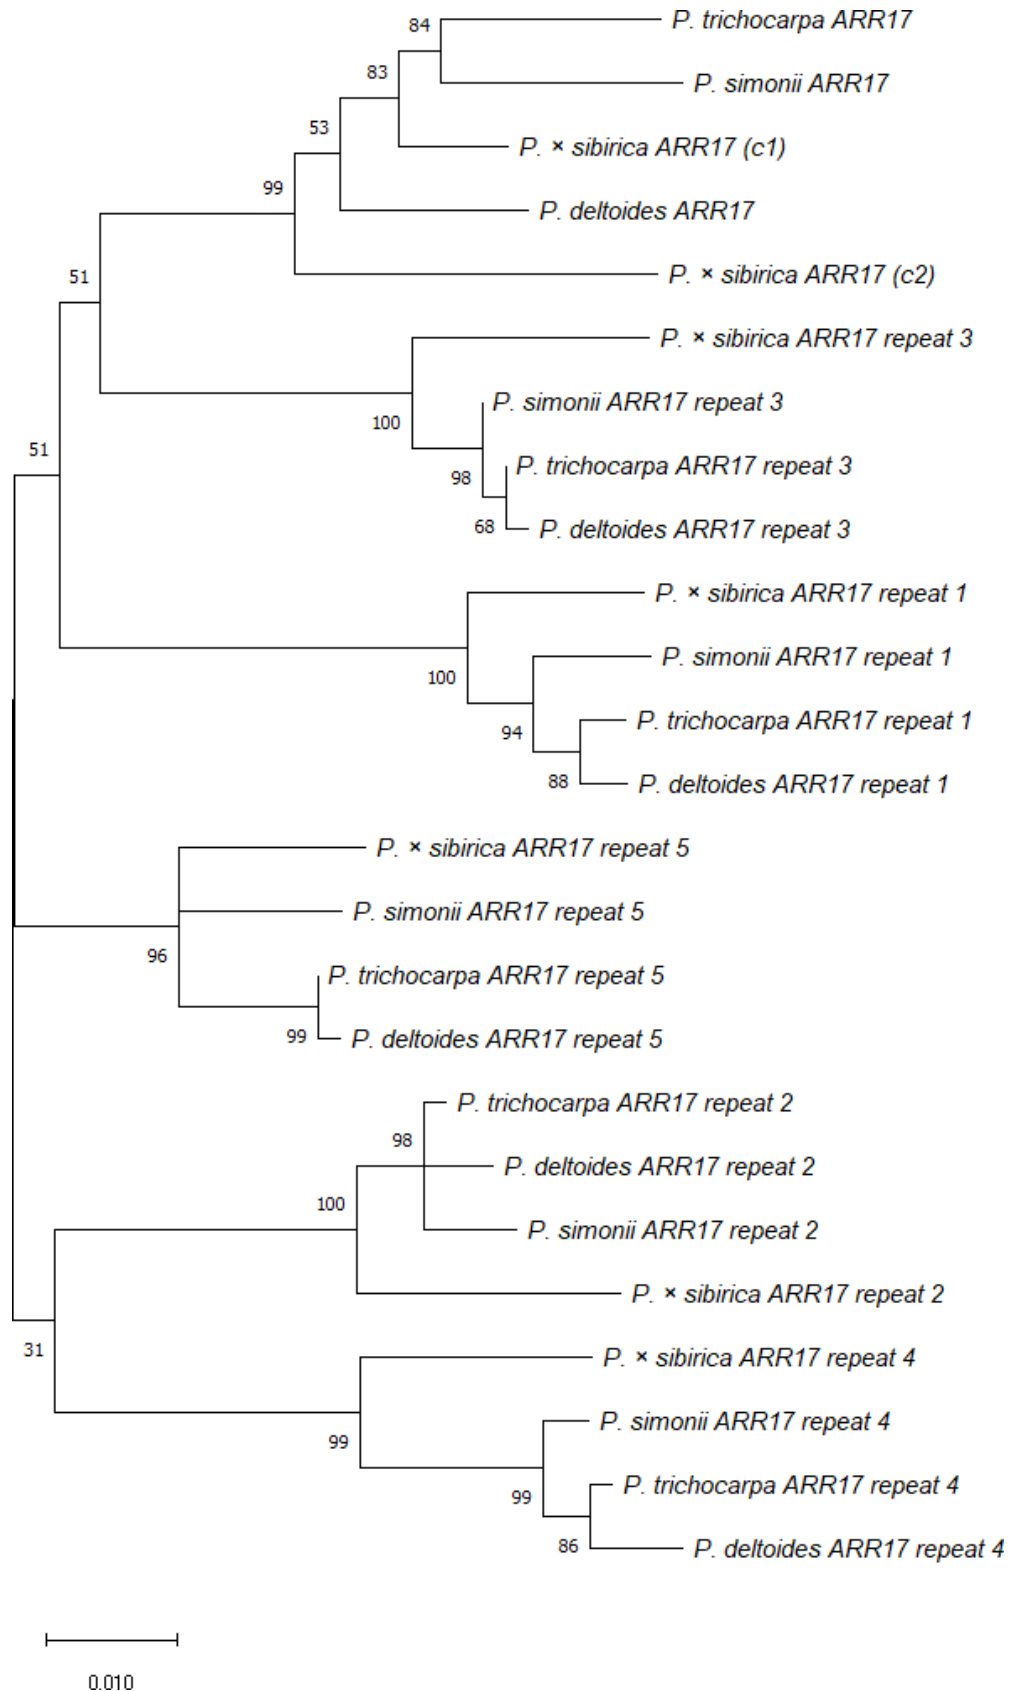

**Supplementary Data 5.** Clusterization of the *ARR17* gene and five *ARR17* partial repeats of males of *P. x sibirica*, *P. trichocarpa*, *P. deltoidea*, and *P. simonii*. In the *P. x sibirica* genome assembly, two allelic variants of the *ARR17* gene were identified (designated *ARR17* (c1) and *ARR17* (c2)). *ARR17* partial repeat 1 is the closest to the end of the chromosome and the subsequent ones are located further from the end in ascending order, according to the *P. trichocarpa* “Stettler 14” genome assembly.
