# Supplementary material for: Genome Assembly and Sex-Determining Region of Male and Female Populus × sibirica
Source: Frontiers journal article supplement (doi:10.3389/fpls.2021.625416), 2021-09-08
Supplement: Data_Sheet_10.PDF [file Data_Sheet_10.PDF]

**Supplementary Data 10.** Clusterization of 70 *Populus* males and the male *P. × sibirica* based on Illumina WGS data aligned to the male *P. × sibirica* genome assembly with a further search for polymorphisms in the X SDR haplotype.
