# Supplementary material for: Genome Assembly and Sex-Determining Region of Male and Female Populus × sibirica
Source: Front Plant Sci. 2021 Sep 8;12:625416. doi: 10.3389/fpls.2021.625416 (PMC8455832; doi:10.3389/fpls.2021.625416)
Supplement: Supplementary Data 8 — Genetic polymorphisms of P. × sibirica, P. nigra, P. deltoides, P. trichocarpa, P. balsamifera, P. simonii, P. cathayana, P. koreana males based on Illumina WGS data aligned to the male P. trichocarpa “Stettler 14” genome with a further search for polymorphisms in the SDR. The numbers located one below the other indicate the number of reads with the reference (bottom) and alternative (top) alleles. [file Data_Sheet_8.XLSX]

## Sheet: SNP table
Supplementary Data 8. Genetic polymorphisms of P. × sibirica, P. nigra, P. deltoides, P. trichocarpa, P. balsamifera, P. simonii, P. cathayana, P. koreana males based on Illumina WGS data aligned to the male P. trichocarpa “Stettler 14” genome with a further search for polymorphisms in the SDR.
The numbers located one below the other indicate the number of reads with the reference (bottom) and alternative (top) alleles.
Chromosome	Nucleotide position	Reference allele	Alternative allele	P.trichocarpa - SRR1821247	P.trichocarpa - SRR1821251	P.trichocarpa - SRR1821249	P.trichocarpa - SRR1821241	P.trichocarpa - SRR1821244	P.trichocarpa - SRR1821248	P.balsamifera - SRR1821322	P.trichocarpa - SRR1821239	P.trichocarpa - SRR1821254	P.trichocarpa - SRR1821235	P.trichocarpa - SRR1821240	P.trichocarpa - SRR1821252	P.trichocarpa - SRR1821246	P.trichocarpa - SRR1821237	P.balsamifera - SRR1821331	P.balsamifera - SRR1821333	P.balsamifera - SRR1821325	P.balsamifera - SRR1821345	P.balsamifera - SRR1821346	P.balsamifera - SRR1821336	P.trichocarpa - SRR1821238	P.trichocarpa - SRR1821250	P.balsamifera - SRR1821255	P.balsamifera - SRR1821718	P.balsamifera - SRR1821328	P.balsamifera - SRR1821347	P.balsamifera - SRR1821259	P.balsamifera - SRR1821337	P.cathayana - SRR9007071	P.simonii - SRR9007072	P.lasiocarpa - SRR9007073	P.koreana - SRR12235434	P.balsamifera - SRR1821319	P.deltoides - SRR11622709	P.deltoides - SRR11622725	P.deltoides - SRR11622707	P.deltoides - SRR11622687	P.deltoides - SRR11622693	P.deltoides - SRR11622724	P.deltoides - SRR11622708	P.deltoides - SRR11622701	P.deltoides - SRR11622705	P.deltoides - SRR11622692	P.deltoides - SRR11622726	P.deltoides - SRR11622702	P.deltoides - SRR11622686
18	16200005	A	G	0 43	0 26	0 52	0 50	0 45	0 61	0 24	0 45	1 45	0 52	0 67	0 50	0 36	0 45	0 7	0 12	0 17	0 20	0 13	0 21	0 46	0 35	0 10	0 15	0 14	0 16	0 14	0 21	0 32	17 17	0 40	7 3	0 38	0 26	0 24	0 28	0 32	0 31	0 31	0 31	0 47	0 20	0 26	0 34	0 32	0 38
18	16200007	C	T	0 43	0 28	0 50	0 49	0 46	0 61	0 25	0 45	0 47	0 50	0 67	0 52	0 37	0 44	0 6	0 12	0 18	0 19	0 13	0 23	0 47	0 35	0 12	0 14	0 16	0 16	0 14	0 20	22 11	18 17	17 24	3 7	0 38	0 25	0 23	0 27	0 30	0 32	0 31	0 32	0 45	0 20	0 26	0 35	0 31	0 37
18	16200011	A	G	0 42	0 26	0 49	0 49	0 47	0 62	0 24	0 45	0 44	0 49	0 69	0 54	0 41	0 46	0 5	0 12	0 18	0 18	0 14	0 24	0 46	0 33	0 10	0 16	0 15	0 17	0 15	0 20	0 33	0 32	0 42	0 10	0 39	0 27	0 25	0 31	0 30	0 31	0 31	0 30	0 46	0 21	0 27	0 34	0 33	0 38
18	16200020	A	T	0 42	0 27	0 51	0 44	0 48	0 65	0 22	0 48	0 46	0 49	0 73	0 54	0 48	0 44	0 3	0 14	0 20	0 21	0 19	0 21	0 42	0 33	0 15	0 16	0 15	0 15	0 15	0 25	0 35	0 30	0 39	0 10	0 46	0 26	0 22	0 26	0 26	0 33	0 26	0 25	0 46	0 21	0 23	0 35	0 31	0 37
18	16200029	A	T	0 40	0 27	0 53	0 41	0 46	0 63	0 21	0 47	0 47	0 49	0 70	0 49	0 48	0 39	0 2	0 13	0 18	0 22	0 16	0 25	0 37	0 37	0 17	0 15	0 15	0 16	0 14	0 20	0 31	0 32	0 42	0 10	0 47	0 26	0 22	0 27	0 23	0 30	0 29	0 24	0 41	0 24	0 25	0 30	0 30	0 38
18	16200037	CAA	AAT	0 39	0 28	0 52	0 43	0 45	0 61	0 24	0 44	0 49	0 49	0 64	0 47	0 52	0 39	0 2	0 12	0 17	0 19	0 18	0 24	0 39	0 38	0 18	0 16	0 12	0 17	0 13	0 22	31 0	32 0	36 0	10 0	24 21	24 0	22 0	26 0	24 0	35 0	30 0	25 0	38 0	24 0	23 0	30 0	32 0	33 0
18	16200048	CTGTA	TTGTG	0 36	0 27	0 49	0 42	0 44	0 56	0 26	0 42	0 53	0 47	0 63	0 41	0 48	0 36	0 3	0 14	0 17	0 14	0 17	0 24	0 41	0 45	0 19	0 16	0 14	0 17	0 18	0 22	0 21	0 24	0 18	0 3	0 24	0 0	0 0	0 0	0 0	0 0	0 0	0 0	0 0	0 0	0 0	0 0	0 0	0 0
18	16200050	G	T	0 36	0 27	0 49	0 42	0 44	0 56	0 26	0 42	0 53	0 47	0 63	0 41	0 48	0 36	0 3	0 14	0 17	0 14	0 17	0 24	0 41	0 45	0 19	0 16	0 14	0 17	0 18	0 22	0 21	0 24	0 18	0 3	0 24	0 0	0 0	0 0	0 0	0 0	0 0	0 0	0 0	0 0	0 0	0 0	0 0	0 0
18	16200052	A	G	0 36	0 27	0 49	0 42	0 44	0 56	0 26	0 42	0 53	0 47	0 63	0 41	0 48	0 36	0 3	0 14	0 17	0 14	0 17	0 24	0 41	0 45	0 19	0 16	0 14	0 17	0 18	0 22	10 21	13 24	19 18	7 3	23 24	27 0	20 0	27 0	28 0	40 0	30 0	23 0	37 0	23 0	25 0	31 0	31 0	35 0
18	16200065	T	A	0 38	0 25	0 55	0 50	0 46	0 50	0 26	0 45	0 53	0 50	0 58	0 45	0 48	0 35	0 2	0 16	0 15	0 15	0 20	0 26	0 45	0 52	0 18	0 15	0 11	0 15	0 17	0 21	0 33	0 41	0 39	0 11	0 51	0 30	0 19	0 29	0 33	0 41	0 29	0 25	0 39	0 25	0 29	0 33	0 38	0 35
18	16200065	T	AA	0 38	0 25	0 55	0 50	0 46	0 50	0 26	0 45	0 53	0 50	0 58	0 45	0 48	0 35	0 2	0 16	0 15	0 15	0 20	0 26	0 45	0 52	0 18	0 15	0 11	0 15	0 17	0 21	0 33	0 41	0 39	0 11	0 51	0 30	0 19	0 29	0 33	0 41	0 29	0 25	0 39	0 25	0 29	0 33	0 38	0 35
18	16200065	T	C	0 38	0 25	0 55	0 50	0 46	0 50	0 26	0 45	0 53	0 50	0 58	0 45	0 48	0 35	0 2	0 16	0 15	0 15	0 20	0 26	0 45	0 52	0 18	0 15	0 11	0 15	0 17	0 21	0 33	0 41	0 39	0 11	0 51	0 30	0 19	0 29	0 33	0 41	0 29	0 25	0 39	0 25	0 29	0 33	0 38	0 35
18	16200067	A	T	0 38	0 25	0 55	0 51	0 46	0 50	0 27	0 50	0 54	0 50	0 57	0 44	0 46	0 37	0 2	0 16	0 13	0 15	0 20	0 27	0 48	0 53	0 19	0 15	0 12	0 16	0 18	0 20	0 34	0 43	0 40	0 11	0 53	0 30	0 20	0 30	0 33	0 39	0 29	0 26	0 39	0 24	0 29	0 32	0 38	0 35
18	16200087	C	T	0 42	0 24	0 52	0 48	0 42	0 51	0 27	0 42	0 52	0 55	0 59	0 48	0 45	0 34	0 5	0 15	0 13	0 12	0 22	0 27	0 42	0 50	0 22	0 17	0 14	0 20	0 20	0 26	0 34	0 44	0 43	0 10	0 54	0 32	0 17	0 26	0 33	0 38	0 30	0 25	0 37	0 21	0 33	0 32	0 35	0 30
18	16200088	G	A	0 42	0 23	0 52	0 48	0 43	0 51	0 27	0 43	0 54	0 56	0 57	0 47	0 45	0 33	0 5	0 15	0 12	0 12	0 23	0 26	0 42	0 50	0 22	0 17	0 14	0 20	0 20	0 26	0 34	0 45	0 44	0 10	0 53	0 31	0 16	0 26	0 32	0 38	0 30	0 25	0 36	0 22	0 33	0 31	0 34	0 29
18	16200102	A	G	0 41	0 18	0 48	0 55	0 46	0 50	0 28	0 47	0 52	0 59	0 63	0 49	0 50	0 33	0 6	0 12	0 15	0 14	0 23	0 28	0 42	0 46	0 23	0 14	0 13	0 16	0 21	0 21	0 33	0 48	0 41	0 10	0 49	0 31	0 13	0 23	0 31	0 36	0 27	0 27	0 35	0 24	0 32	0 29	0 30	0 32
18	16200113	C	G	0 37	0 18	0 50	0 59	0 53	0 47	0 28	0 47	0 50	0 56	0 63	0 52	0 44	0 38	0 7	0 15	0 15	0 16	0 23	0 26	0 40	0 41	0 23	0 14	0 14	0 15	0 22	0 20	0 28	0 24	0 22	0 3	0 46	0 32	0 11	0 22	0 33	0 38	0 26	0 27	0 34	0 23	0 32	0 32	0 27	0 32
18	16200113	C	T	0 37	0 18	0 50	0 59	0 53	0 47	0 28	0 47	0 50	0 56	0 63	0 52	0 44	0 38	0 7	0 15	0 15	0 16	0 23	0 26	0 40	0 41	0 23	0 14	0 14	0 15	0 22	0 20	0 28	22 24	19 22	6 3	0 46	0 32	0 11	0 22	0 33	0 38	0 26	0 27	0 34	0 23	0 32	0 32	0 27	0 32
18	16200115	G	A	0 35	0 17	0 50	0 60	0 53	0 46	0 28	0 47	0 49	0 57	0 61	0 51	0 42	0 37	0 8	0 16	0 15	0 16	0 21	0 26	0 41	0 40	0 22	0 15	0 16	0 15	0 22	0 18	0 29	0 46	0 41	0 9	0 43	0 32	0 12	0 20	0 31	0 35	0 26	0 25	0 33	0 21	0 33	0 29	15 12	0 31
18	16200117	AT	C	0 34	0 17	0 50	0 60	0 50	0 46	0 28	0 45	0 50	0 59	0 59	0 48	0 38	0 35	0 8	0 15	0 15	0 15	0 19	0 27	0 40	0 38	0 20	0 15	0 14	0 15	0 22	0 19	0 29	0 46	0 41	0 9	0 44	0 29	0 12	0 21	0 30	0 36	0 27	0 25	0 32	0 21	0 31	0 31	0 27	0 30
18	16200148	TGCACACT	CGC	0 38	0 12	0 55	0 54	0 47	0 47	0 18	0 44	0 47	0 56	0 63	0 47	0 38	0 32	0 8	0 14	0 15	0 14	0 21	0 24	0 34	0 31	0 18	0 12	0 10	0 18	0 24	0 22	0 22	0 36	0 31	0 9	0 32	0 28	0 7	0 22	0 27	0 35	0 21	0 21	0 29	0 17	0 31	0 28	0 21	0 28
18	16200148	TGCA	CGCC	0 38	0 12	0 55	0 54	0 47	0 47	0 18	0 44	0 47	0 56	0 63	0 47	0 38	0 32	0 8	0 14	0 15	0 14	0 21	0 24	0 34	0 31	0 18	0 12	0 10	0 18	0 24	0 22	0 22	0 36	0 31	0 9	0 32	0 28	0 7	0 22	0 27	0 35	0 21	0 21	0 29	0 17	0 31	0 28	0 21	0 28
18	16200148	T	G	0 38	0 12	0 55	0 54	0 47	0 47	0 18	0 44	0 47	0 56	0 63	0 47	0 38	0 32	0 8	0 14	0 15	0 14	0 21	0 24	0 34	0 31	0 18	0 12	0 10	0 18	0 24	0 22	0 22	0 36	0 31	0 9	0 32	0 28	0 7	0 22	0 27	0 35	0 21	0 21	0 29	0 17	0 31	0 28	0 21	0 28
18	16200149	G	C	0 38	0 12	0 55	0 54	0 47	0 47	0 18	0 44	0 47	0 56	0 63	0 47	0 38	0 32	0 8	0 14	0 15	0 14	0 21	0 24	0 34	0 31	0 18	0 12	0 10	0 18	0 24	0 22	0 22	0 36	0 31	0 9	0 32	0 28	0 7	0 22	0 27	0 35	0 21	0 21	0 29	0 17	0 31	0 28	0 21	0 28
18	16200151	A	G	0 38	0 12	0 55	1 54	0 47	0 47	0 18	0 44	0 47	0 56	0 63	0 47	0 38	0 32	0 8	0 14	0 15	0 14	0 21	0 24	0 34	0 31	0 18	0 12	0 10	0 18	0 24	0 22	0 22	0 36	0 31	0 9	0 32	0 28	0 7	0 22	0 27	0 35	0 21	0 21	0 29	0 17	0 31	0 28	0 21	0 28
18	16200159	GA	AT	0 41	0 12	0 64	0 56	0 53	0 55	0 20	0 48	0 48	0 57	0 70	0 56	0 43	0 37	0 9	0 14	0 16	0 15	0 22	0 24	0 38	0 33	0 20	0 12	0 11	0 19	0 27	0 27	0 23	0 36	0 30	0 8	0 34	0 28	0 6	0 21	0 33	0 37	0 21	0 24	0 32	0 19	0 33	0 31	0 22	0 29
18	16200160	A	T	0 41	0 12	0 64	0 56	0 53	0 55	0 20	0 48	0 48	0 57	0 70	0 56	0 43	0 37	0 9	0 14	0 16	0 15	1 22	0 24	0 38	0 33	0 20	0 12	0 11	0 19	0 27	0 27	0 23	0 36	0 30	0 8	0 34	0 28	0 6	0 21	0 33	0 37	0 21	0 24	0 32	0 19	0 33	0 31	0 22	0 29
18	16200164	T	C	0 42	0 13	0 63	0 54	0 54	0 56	0 20	0 48	0 45	0 58	0 72	0 57	0 42	0 37	0 10	0 15	0 16	0 17	0 23	0 23	0 40	0 35	0 22	0 13	0 12	0 21	0 23	0 30	0 24	0 35	0 32	0 8	1 31	0 28	0 6	0 20	0 33	0 35	0 20	0 25	0 29	0 19	0 34	0 33	0 19	0 30
18	16200172	A	C	0 45	0 14	0 60	0 55	0 52	0 53	0 20	0 48	0 41	0 59	0 68	0 58	0 44	0 35	0 10	0 14	0 18	0 18	0 26	0 22	0 44	0 31	0 22	0 15	0 12	0 20	0 23	0 29	0 27	0 39	0 32	0 7	0 30	0 28	0 6	0 22	0 31	0 34	0 19	0 26	0 29	0 16	0 32	0 29	0 20	0 28
18	16200173	G	T	0 45	0 14	0 60	0 54	0 53	0 54	0 20	0 48	0 41	0 59	0 68	0 58	0 44	0 35	0 10	0 14	0 18	0 18	0 26	0 23	0 45	0 31	0 21	0 14	0 12	0 19	0 23	0 29	14 12	18 22	16 15	3 4	0 29	0 27	0 6	0 22	0 31	0 34	0 16	0 25	0 30	0 15	0 32	0 31	0 21	0 28
18	16200188	G	C	0 46	0 16	0 58	0 55	0 60	0 61	0 20	0 54	0 42	0 54	0 70	0 54	0 45	0 35	0 8	0 16	0 19	0 19	0 27	0 25	0 49	0 32	0 23	0 15	0 10	0 17	0 22	0 28	0 25	0 37	0 33	0 6	0 30	0 27	0 6	0 23	0 33	0 28	0 15	0 25	0 29	0 19	0 34	0 32	0 23	0 25
18	16200192	TTGTAACAAGAGA	T	0 42	0 17	0 57	0 43	0 53	0 53	0 14	0 45	0 38	0 45	0 57	0 46	0 36	0 28	0 7	0 15	0 16	0 14	0 23	0 21	0 45	0 30	0 20	0 15	0 9	0 16	0 18	0 27	0 20	0 33	0 31	0 7	0 24	0 25	0 5	0 19	0 25	0 24	0 12	0 23	0 26	0 19	0 26	0 24	0 22	0 21
18	16200195	T	A	0 42	0 17	0 57	0 43	0 53	0 53	0 14	0 45	0 38	0 45	0 57	0 46	0 36	0 28	0 7	0 15	0 16	0 14	0 23	0 21	0 45	0 30	0 20	0 15	0 9	0 16	0 18	0 27	0 20	0 33	0 31	0 7	0 24	0 25	0 5	0 19	0 25	0 24	0 12	0 23	0 26	0 19	0 26	0 24	0 22	0 21
18	16200207	T	G	0 47	0 19	0 63	0 48	0 54	0 59	0 16	0 54	0 51	0 50	0 65	0 57	0 42	0 30	0 8	0 16	0 19	0 17	0 25	0 24	0 52	0 31	0 24	0 22	0 9	0 19	0 23	0 32	0 27	0 37	0 45	0 7	0 22	0 31	0 10	0 20	0 33	0 27	0 15	0 28	0 32	0 22	0 25	0 28	0 27	0 22
18	16200231	A	ACT	0 30	0 20	0 41	0 33	0 17	0 20	0 13	0 46	0 36	0 43	0 56	0 50	0 36	0 25	0 7	0 14	0 9	0 6	0 25	0 14	0 53	0 36	0 15	0 17	0 10	0 16	0 16	0 22	0 1	0 1	0 2	0 1	0 10	13 0	0 0	0 0	0 0	0 0	0 0	0 2	0 0	0 1	0 0	0 0	0 0	0 0
18	16200232	CT	C	2 30	1 20	0 41	0 33	26 17	32 20	0 13	0 46	0 36	1 43	0 56	0 50	0 36	0 25	0 7	0 14	4 9	8 6	0 25	1 14	2 53	1 36	1 15	0 17	0 10	0 16	0 16	0 22	0 1	0 1	0 2	0 1	1 10	0 0	0 0	0 0	0 0	0 0	0 0	0 2	0 0	0 1	0 0	0 0	0 0	0 0
18	16200232	C	CT	1 30	0 20	0 41	0 33	0 17	0 20	0 13	0 46	0 36	0 43	0 56	0 50	0 36	0 25	1 7	0 14	0 9	0 6	0 25	0 14	0 53	0 36	0 15	0 17	0 10	0 16	0 16	0 22	17 1	24 1	42 2	8 1	10 10	0 0	0 0	10 0	26 0	12 0	0 0	1 2	0 0	1 1	0 0	0 0	1 0	1 0
18	16200232	C	CTT	0 30	0 20	0 41	0 33	0 17	0 20	0 13	0 46	0 36	0 43	0 56	0 50	0 36	0 25	0 7	0 14	0 9	0 6	0 25	0 14	0 53	0 36	0 15	0 17	0 10	0 16	0 16	0 22	0 1	0 1	0 2	0 1	0 10	11 0	9 0	3 0	2 0	12 0	12 0	17 2	26 0	16 1	11 0	18 0	23 0	18 0
18	16200232	C	CTTT	0 30	0 20	0 41	0 33	0 17	0 20	0 13	0 46	0 36	0 43	0 56	0 50	0 36	0 25	0 7	0 14	0 9	0 6	0 25	0 14	0 53	0 36	0 15	0 17	0 10	0 16	0 16	0 22	0 1	0 1	0 2	0 1	0 10	2 0	0 0	0 0	1 0	3 0	0 0	0 2	2 0	0 1	8 0	0 0	0 0	0 0
18	16200232	C	T	0 30	0 20	0 41	0 33	0 17	0 20	0 13	0 46	0 36	0 43	0 56	0 50	0 36	0 25	0 7	0 14	0 9	0 6	0 25	0 14	0 53	0 36	0 15	0 17	0 10	0 16	0 16	0 22	0 1	0 1	0 2	0 1	0 10	0 0	0 0	0 0	1 0	0 0	0 0	0 2	0 0	0 1	0 0	0 0	0 0	0 0
18	16200232	C	TT	0 30	0 20	0 41	0 33	0 17	0 20	0 13	0 46	0 36	0 43	0 56	0 50	0 36	0 25	0 7	0 14	0 9	0 6	0 25	0 14	0 53	0 36	0 15	0 17	0 10	0 16	0 16	0 22	0 1	0 1	0 2	0 1	0 10	0 0	0 0	0 0	0 0	0 0	0 0	0 2	0 0	0 1	0 0	0 0	0 0	0 0
18	16200242	CATG	TTTTCATT	0 30	0 20	0 41	0 33	0 17	0 20	0 13	0 46	0 36	0 43	0 56	0 50	0 36	0 25	0 7	0 14	0 9	0 6	0 25	0 14	0 53	0 36	0 15	0 17	0 10	0 16	0 16	0 22	0 1	0 1	0 2	0 1	0 10	0 0	0 0	0 0	0 0	0 0	0 0	0 2	0 0	0 1	0 0	0 0	0 0	0 0
18	16200264	A	G	0 45	0 28	0 44	0 44	0 47	0 56	0 15	0 57	0 45	0 59	0 70	0 60	0 40	0 39	0 8	0 20	0 17	0 17	0 27	0 19	0 60	0 45	0 17	0 19	0 14	0 16	0 21	0 17	0 37	0 27	0 51	0 7	0 34	0 29	0 15	0 16	0 34	0 33	0 13	0 21	0 33	0 23	0 23	0 23	0 25	0 23
18	16200264	A	T	0 45	0 28	0 44	0 44	0 47	0 56	0 15	0 57	0 45	0 59	0 70	0 60	0 40	0 39	0 8	0 20	0 17	0 17	0 27	0 19	0 60	0 45	0 17	0 19	0 14	0 16	0 21	0 17	0 37	0 27	0 51	0 7	0 34	0 29	0 15	0 16	0 34	0 33	0 13	0 21	0 33	0 23	0 23	0 23	0 25	0 23
18	16200272	C	A	0 46	0 27	0 48	0 44	0 46	0 58	0 18	0 58	0 44	0 57	0 78	0 54	0 38	0 38	0 8	0 20	0 19	0 17	0 28	0 18	0 56	0 48	0 17	0 19	0 13	0 17	0 24	0 17	0 37	0 29	0 50	0 7	0 33	0 26	0 16	0 15	0 30	0 29	0 12	0 19	0 33	0 25	0 20	0 20	0 26	0 21
18	16200285	T	C	0 46	0 24	0 53	0 43	0 45	0 58	0 21	0 53	0 40	0 59	0 78	0 55	0 40	0 39	0 7	0 22	0 18	0 19	0 25	0 17	0 63	0 46	0 17	0 18	0 14	0 16	0 22	0 21	9 22	16 13	21 23	4 3	0 33	0 27	0 18	0 12	0 33	0 26	0 11	0 19	0 32	0 24	0 20	0 20	0 25	0 22
18	16200288	A	G	0 48	0 24	0 52	0 46	0 45	0 57	0 22	0 51	0 40	0 57	0 77	0 55	0 41	0 40	0 7	0 21	0 18	0 18	0 24	0 18	0 63	0 48	0 16	0 20	0 14	0 15	0 22	0 22	0 31	0 30	0 45	0 7	0 33	0 28	0 19	0 13	0 34	0 26	0 11	0 20	0 33	0 24	0 19	0 24	0 25	0 22
18	16200295	C	CCA	0 47	0 24	0 50	0 45	0 43	0 56	0 22	0 53	0 33	0 55	0 72	0 47	0 40	0 38	0 5	0 21	0 17	0 19	0 21	0 16	0 62	0 47	0 15	0 16	0 14	0 13	0 22	0 22	0 31	0 31	0 45	0 7	0 33	0 28	0 19	0 13	0 33	0 28	0 11	0 20	0 33	0 23	0 20	0 22	0 27	0 20
18	16200295	C	T	0 47	0 24	0 50	0 45	0 43	0 56	0 22	0 53	0 33	0 55	0 72	0 47	0 40	0 38	0 5	0 21	0 17	0 19	0 21	0 16	0 62	0 47	0 15	0 16	0 14	0 13	0 22	0 22	0 31	0 31	0 45	0 7	0 33	0 28	0 19	0 13	0 33	0 28	0 11	0 20	0 33	0 23	0 20	0 22	0 27	0 20
18	16200296	G	A	0 47	0 24	0 50	0 45	0 43	0 56	0 22	0 53	0 33	0 55	0 72	0 47	0 40	0 38	0 5	0 21	0 17	0 19	0 21	0 16	0 62	0 47	0 15	0 16	0 14	0 13	0 22	0 22	0 31	0 31	0 45	0 7	0 33	0 28	0 19	0 13	0 33	0 28	0 11	0 20	0 33	0 23	0 20	0 22	0 27	0 20
18	16200296	G	CAA	0 47	0 24	0 50	0 45	0 43	0 56	0 22	0 53	0 33	0 55	0 72	0 47	0 40	0 38	0 5	0 21	0 17	0 19	0 21	0 16	0 62	0 47	0 15	0 16	0 14	0 13	0 22	0 22	0 31	0 31	0 45	0 7	0 33	0 28	0 19	0 13	0 33	0 28	0 11	0 20	0 33	0 23	0 20	0 22	0 27	0 20
18	16200296	GC	CAGT	0 47	0 24	0 50	0 45	0 43	0 56	0 22	0 53	0 33	0 55	0 72	0 47	0 40	0 38	0 5	0 21	0 17	0 19	0 21	0 16	0 62	0 47	0 15	0 16	0 14	0 13	0 22	0 22	0 31	0 31	0 45	0 7	0 33	0 28	0 19	0 13	0 33	0 28	0 11	0 20	0 33	0 23	0 20	0 22	0 27	0 20
18	16200301	A	C	0 47	0 24	0 52	1 49	0 45	0 58	0 24	0 55	0 36	0 56	0 73	0 50	0 41	0 40	0 6	0 21	0 17	0 23	0 19	0 15	0 65	0 47	0 15	0 15	0 15	0 15	0 18	0 20	0 33	0 33	0 47	0 6	0 34	0 28	0 19	1 12	0 31	0 26	0 11	0 20	0 36	0 23	0 19	0 21	18 10	0 20
18	16200310	C	G	0 46	0 22	0 56	0 54	0 45	0 52	0 20	0 52	0 40	0 59	0 77	0 51	0 45	0 42	0 6	0 21	0 17	0 21	0 19	0 18	0 62	0 49	0 13	0 15	0 15	0 13	0 20	0 19	0 31	0 33	0 46	0 7	0 36	0 27	0 20	0 16	0 30	0 26	0 13	0 18	0 36	0 24	0 18	0 16	0 28	0 23
18	16200316	C	A	0 47	0 23	0 52	0 55	0 45	0 57	0 21	0 51	0 39	0 57	0 76	0 51	0 46	0 42	0 6	0 18	0 20	0 21	0 19	0 21	0 60	0 47	0 12	0 15	0 14	0 14	0 19	0 18	0 29	0 34	0 47	0 7	0 38	0 26	0 22	0 19	23 9	0 26	0 14	0 18	0 36	0 24	0 19	0 18	1 30	0 25
18	16200319	A	G	0 48	0 23	0 53	0 55	0 44	0 57	0 21	0 51	0 41	0 55	0 77	0 51	0 46	0 45	0 8	0 18	0 20	0 20	0 19	0 19	0 58	0 48	0 12	0 15	0 14	0 12	0 18	0 20	0 28	0 34	0 46	0 6	0 37	0 27	0 23	0 17	9 22	10 18	0 13	0 18	0 36	0 24	0 19	0 18	0 30	0 24
18	16200324	GAC	G	0 35	0 12	0 46	0 42	0 32	0 44	0 14	0 35	0 36	0 40	0 54	0 34	0 37	0 30	0 5	0 10	0 14	0 14	0 13	0 14	0 40	0 13	0 9	0 12	0 9	0 9	0 15	0 22	0 18	0 25	0 29	0 5	0 25	0 19	0 19	0 14	0 22	0 26	0 11	0 14	0 30	0 17	0 15	0 15	0 18	0 21
18	16200333	A	G	0 35	0 12	0 46	0 42	0 32	0 44	0 14	0 35	0 36	0 40	0 54	0 34	0 37	0 30	0 5	0 10	0 14	0 14	0 13	0 14	0 40	0 13	0 9	0 12	0 9	0 9	1 15	0 22	0 18	0 25	0 29	0 5	0 25	0 19	0 19	0 14	0 22	0 26	0 11	0 14	0 30	0 17	0 15	0 15	0 18	0 21
18	16200334	C	A	0 35	0 12	0 46	0 42	0 32	0 44	0 14	0 35	0 36	0 40	0 54	0 34	0 37	0 30	0 5	0 10	0 14	0 14	0 13	0 14	0 40	17 13	0 9	0 12	0 9	0 9	0 15	0 22	0 18	0 25	0 29	0 5	0 25	0 19	0 19	0 14	0 22	0 26	0 11	0 14	0 30	0 17	0 15	0 15	0 18	0 21
18	16200342	TATA	CATG	0 35	0 12	0 46	0 42	0 32	0 44	0 14	0 35	0 36	0 40	0 54	0 34	0 37	0 30	0 5	0 10	0 14	0 14	0 13	0 14	0 40	0 13	0 9	0 12	0 9	0 9	0 15	0 22	0 18	0 25	0 29	0 5	0 25	0 19	0 19	0 14	0 22	0 26	0 11	0 14	0 30	0 17	0 15	0 15	0 18	0 21
18	16200352	C	T	0 54	0 19	0 58	0 55	0 44	0 54	0 27	0 47	0 41	0 55	0 66	0 47	0 49	0 38	0 8	0 14	0 18	0 21	0 17	0 26	0 48	0 42	0 17	0 14	0 12	0 14	0 24	0 28	0 26	0 36	0 38	0 9	0 36	0 21	0 22	0 17	0 27	0 31	0 16	0 15	0 36	0 25	0 16	0 22	0 21	0 25
18	16200366	C	T	0 52	0 20	0 60	0 52	0 45	0 50	0 26	0 43	0 41	0 56	0 72	0 45	0 52	0 33	0 8	0 16	0 13	0 23	0 15	0 24	0 49	0 42	0 19	0 13	0 13	0 12	0 22	0 28	0 28	0 38	0 34	0 9	0 35	0 23	0 21	0 20	0 30	0 31	0 17	0 12	0 31	0 26	0 18	0 25	12 10	0 29
18	16200376	A	G	0 50	0 22	0 55	0 53	0 42	0 47	0 24	0 48	1 41	0 58	0 66	0 43	0 49	0 35	0 8	0 16	0 15	0 22	0 13	0 23	0 49	0 39	0 17	0 15	0 13	0 14	0 20	0 25	0 30	0 43	0 34	0 11	0 34	0 26	0 22	0 22	0 31	0 28	0 20	0 10	0 32	0 29	0 15	0 29	0 25	0 32
18	16200397	C	T	0 51	0 24	0 59	0 52	0 51	0 46	0 23	0 49	1 38	0 56	0 69	0 45	0 48	0 38	0 8	0 11	0 17	0 20	0 14	0 22	0 38	0 44	0 18	0 16	0 12	0 10	0 20	0 25	0 30	0 37	0 32	0 10	0 35	0 27	0 21	0 25	0 35	0 28	0 19	0 11	0 33	0 28	0 17	0 28	0 30	0 31
18	16200437	C	T	0 45	0 22	0 58	0 54	0 57	0 45	0 26	0 54	0 49	0 54	0 76	0 41	0 42	0 37	0 9	0 10	0 16	0 20	0 20	0 20	0 41	0 54	0 21	0 18	0 17	0 17	0 18	0 27	0 28	0 40	0 35	0 10	0 21	0 21	0 20	0 28	0 38	0 28	0 23	0 12	0 38	0 35	0 21	0 28	0 31	0 34
18	16200442	A	G	0 42	0 24	0 55	0 53	0 55	0 48	0 26	0 53	0 51	0 52	0 77	0 40	0 38	0 38	0 7	0 11	0 18	0 19	0 20	0 19	0 43	0 52	0 20	0 19	0 17	0 17	0 20	0 30	0 29	0 43	0 37	0 9	0 22	0 23	0 19	0 26	0 40	0 30	0 22	0 10	0 39	0 35	0 22	0 29	0 29	0 34
18	16200454	A	T	0 43	0 21	0 61	0 53	0 58	0 52	0 25	0 52	0 54	0 46	0 74	0 41	0 39	1 37	0 10	0 11	0 18	0 18	0 20	0 16	0 41	0 52	0 18	0 23	0 16	0 14	0 19	0 27	0 28	0 42	0 39	0 10	0 24	0 26	0 21	0 29	0 45	0 29	0 27	0 10	0 38	0 36	0 24	0 33	0 30	0 36
18	16200463	G	T	0 45	0 19	0 59	0 54	0 61	0 57	0 25	0 54	0 54	0 45	0 69	0 43	0 39	0 38	0 10	0 9	0 18	0 17	0 20	0 19	0 43	0 52	0 15	0 26	0 17	0 17	0 21	0 31	0 29	0 37	0 39	0 10	0 23	0 25	0 21	0 29	0 45	0 30	0 27	0 9	0 43	0 38	0 26	0 35	0 30	0 35
18	16200508	T	C	0 35	0 14	0 52	0 56	0 58	0 52	0 20	0 47	0 46	0 49	0 75	0 40	0 47	0 36	0 11	0 10	0 19	0 18	0 20	0 18	0 42	0 39	0 19	0 13	0 15	0 23	0 22	0 31	0 24	0 36	0 39	0 12	0 20	0 31	0 23	0 32	0 44	0 29	0 25	0 15	0 45	0 32	0 32	0 31	0 32	0 35
18	16200511	A	T	0 36	0 13	0 53	0 58	0 57	0 53	0 19	0 45	0 46	0 49	0 79	0 40	0 50	0 35	0 12	1 9	0 20	0 18	0 20	0 20	0 42	0 38	0 19	0 13	0 16	0 24	0 23	0 30	0 25	0 35	0 39	0 12	0 20	0 32	0 23	0 31	0 44	0 30	0 23	0 16	0 44	0 32	0 32	0 31	0 34	0 34
18	16200550	G	A	0 40	0 22	0 59	0 62	0 50	0 62	0 15	0 50	0 38	0 53	0 83	0 52	0 62	0 36	0 10	0 13	0 20	0 17	0 18	0 22	0 54	0 42	0 17	0 16	0 16	0 18	0 22	0 31	0 23	0 33	0 37	0 15	0 24	0 25	0 26	0 29	0 32	0 32	0 21	0 14	0 49	0 38	0 33	0 32	0 27	0 26
18	16200563	G	GAA	0 33	0 22	0 49	0 52	0 22	0 54	0 2	0 39	0 31	0 43	0 68	0 41	0 48	0 31	0 5	0 13	0 15	0 14	0 9	0 12	0 45	0 39	0 16	0 10	0 13	0 14	0 17	0 22	0 15	0 27	0 30	0 15	5 17	10 15	10 15	22 0	25 0	9 17	7 11	0 9	0 43	0 30	0 30	0 29	0 21	0 23
18	16200563	GAAAAAAATTTAACAA	TTAAAAAAAATTAGCAG	0 33	0 22	0 49	0 52	0 22	0 54	0 2	0 39	0 31	0 43	0 68	0 41	0 48	0 31	0 5	0 13	0 15	0 14	0 9	0 12	0 45	0 39	0 16	0 10	0 13	0 14	0 17	0 22	0 15	0 27	0 30	0 15	0 17	0 15	0 15	0 0	0 0	0 17	0 11	0 9	0 43	0 30	0 30	0 29	0 21	0 23
18	16200564	AAAAAAAT	GAAAAAAA	0 33	0 22	0 49	0 52	0 22	0 54	0 2	0 39	0 31	0 43	0 68	0 41	0 48	0 31	0 5	0 13	0 15	0 14	0 9	0 12	0 45	0 39	0 16	0 10	0 13	0 14	0 17	0 22	0 15	0 27	0 30	0 15	0 17	0 15	0 15	0 0	0 0	0 17	0 11	0 9	0 43	0 30	0 30	0 29	0 21	0 23
18	16200568	AAA	TTT	0 33	0 22	0 49	0 52	0 22	0 54	10 2	0 39	0 31	0 43	0 68	0 41	0 48	0 31	0 5	0 13	0 15	0 14	0 9	0 12	0 45	0 39	0 16	0 10	0 13	0 14	0 17	0 22	0 15	0 27	0 30	0 15	0 17	0 15	0 15	0 0	0 0	0 17	0 11	0 9	0 43	0 30	0 30	0 29	0 21	0 23
18	16200569	AA	TT	0 33	0 22	0 49	0 52	18 22	0 54	0 2	0 39	0 31	0 43	0 68	0 41	0 48	0 31	0 5	0 13	0 15	0 14	0 9	0 12	0 45	0 39	0 16	0 10	0 13	0 14	0 17	0 22	0 15	0 27	0 30	0 15	0 17	0 15	0 15	0 0	0 0	0 17	0 11	0 9	0 43	0 30	0 30	0 29	0 21	0 23
18	16200570	A	T	0 33	0 22	0 49	0 52	0 22	0 54	0 2	0 39	0 31	0 43	0 68	0 41	0 48	0 31	0 5	0 13	0 15	0 14	6 9	0 12	0 45	0 39	0 16	0 10	0 13	0 14	0 17	0 22	0 15	0 27	0 30	0 15	0 17	0 15	0 15	0 0	0 0	0 17	0 11	0 9	0 43	0 30	0 30	0 29	0 21	0 23
18	16200571	T	A	0 33	0 22	0 49	0 52	0 22	0 54	0 2	0 39	0 31	0 43	0 68	0 41	0 48	0 31	0 5	0 13	0 15	0 14	0 9	0 12	0 45	0 39	0 16	0 10	0 13	0 14	0 17	0 22	0 15	0 27	0 30	0 15	0 17	0 15	0 15	0 0	0 0	0 17	0 11	0 9	0 43	0 30	0 30	0 29	0 21	0 23
18	16200600	A	G	0 46	0 31	0 56	0 56	0 55	0 66	0 13	0 58	0 40	0 55	0 72	0 48	0 62	0 38	0 7	0 15	0 15	0 15	0 17	0 16	0 54	0 61	0 16	0 18	0 16	0 18	0 21	0 24	12 12	16 16	22 23	10 7	0 37	0 23	0 31	0 23	0 32	0 32	0 20	0 23	0 43	0 31	0 30	0 30	0 27	0 23
18	16200615	C	A	0 51	0 28	0 54	0 47	0 54	0 73	0 16	0 54	0 36	0 51	0 61	0 43	0 55	0 34	0 6	0 13	0 13	0 20	0 19	0 18	0 51	0 60	0 16	0 18	0 14	0 14	0 18	0 26	24 0	31 0	42 0	18 0	14 31	20 0	29 0	24 0	31 0	30 0	19 0	25 0	37 0	28 0	27 1	29 0	26 0	23 0
18	16200615	CAG	AAC	0 51	0 28	0 54	0 47	0 54	0 73	0 16	0 54	0 36	0 51	0 61	0 43	0 55	0 34	0 6	0 13	0 13	0 20	0 19	0 18	0 51	0 60	0 16	0 18	0 14	0 14	0 18	0 26	0 0	0 0	0 0	0 0	0 31	0 0	0 0	0 0	0 0	0 0	0 0	0 0	0 0	0 0	0 1	0 0	0 0	0 0
18	16200615	CAGA	AAGG	0 51	0 28	0 54	0 47	0 54	0 73	0 16	0 54	0 36	0 51	0 61	0 43	0 55	0 34	0 6	0 13	0 13	0 20	0 19	0 18	0 51	0 60	0 16	0 18	0 14	0 14	0 18	0 26	0 0	0 0	0 0	0 0	0 31	0 0	0 0	0 0	0 0	0 0	0 0	0 0	0 0	0 0	0 1	0 0	0 0	0 0
18	16200621	A	T	0 48	0 29	0 57	0 47	0 54	0 73	0 16	0 55	0 39	0 54	0 64	0 46	0 54	0 35	0 6	0 14	0 13	0 20	0 20	0 19	0 51	0 64	0 15	0 20	0 15	0 15	0 17	0 25	10 18	16 17	22 22	6 12	16 31	21 0	28 0	24 0	33 0	31 0	20 0	24 0	36 0	27 0	31 0	31 0	26 0	25 0
18	16200623	AT	A	0 46	0 27	0 51	0 42	0 55	0 64	0 15	0 53	0 39	0 53	0 57	0 39	0 52	0 33	0 5	0 14	0 13	0 20	0 16	0 17	0 49	0 58	0 13	0 19	0 14	0 14	0 19	0 22	0 10	0 14	0 20	0 5	0 46	0 16	0 26	0 23	0 31	0 30	0 19	0 23	0 35	0 27	0 31	0 30	0 26	0 24
18	16200624	TC	T	0 46	0 27	0 51	0 42	0 55	0 64	0 15	0 53	0 39	0 53	0 57	0 39	0 52	0 33	0 5	0 14	0 13	0 20	0 16	0 17	0 49	0 58	0 13	0 19	0 14	0 14	0 19	0 22	17 10	16 14	21 20	11 5	0 46	0 16	0 26	0 23	0 31	0 30	0 19	0 23	0 35	0 27	0 31	0 30	0 26	0 24
18	16200635	AT	GG	0 41	0 27	0 47	0 41	0 55	0 59	0 15	0 49	0 33	0 52	0 55	0 42	0 55	0 32	0 6	0 15	0 17	0 21	0 17	0 21	0 47	0 53	0 16	0 21	0 16	0 16	0 18	0 23	0 33	0 32	0 45	0 15	0 50	0 13	0 26	0 24	0 31	0 28	0 22	0 22	0 33	0 31	0 34	0 35	0 27	0 26
18	16200642	TTTA	T	0 36	0 24	0 45	0 37	0 53	0 51	0 16	0 44	0 29	0 49	0 52	0 42	0 49	0 28	0 6	0 12	0 13	0 21	0 15	0 21	0 41	0 47	0 14	0 17	0 17	0 14	0 16	0 24	0 31	0 26	0 36	0 13	0 42	0 14	0 26	0 18	0 34	0 31	0 22	0 21	0 35	0 31	0 33	0 35	0 23	0 25
18	16200653	A	T	0 42	0 28	0 50	0 38	0 57	0 59	0 23	0 50	0 33	0 53	0 56	0 48	0 54	0 33	0 6	0 14	0 18	0 22	0 16	0 26	0 50	0 52	0 16	0 22	0 20	0 17	0 16	0 27	0 39	0 35	0 39	0 14	0 49	0 14	0 25	0 18	0 32	0 33	0 23	0 26	0 37	0 29	0 31	0 34	0 25	0 28
18	16200659	ACG	CCA	0 39	0 26	0 45	0 40	0 56	0 57	0 21	0 50	0 33	0 52	0 54	0 44	0 51	0 33	0 6	0 13	0 19	0 20	0 14	0 26	0 55	0 49	0 14	0 22	0 20	0 15	0 14	0 28	0 38	0 32	0 38	0 14	0 45	0 14	0 27	0 21	0 33	0 31	0 24	0 26	0 37	0 32	0 31	0 38	0 26	0 27
18	16200659	ACG	CGA	0 39	0 26	0 45	0 40	0 56	0 57	0 21	0 50	0 33	0 52	0 54	0 44	0 51	0 33	0 6	0 13	0 19	0 20	0 14	0 26	0 55	0 49	0 14	0 22	0 20	0 15	0 14	0 28	0 38	0 32	0 38	0 14	0 45	0 14	0 27	0 21	0 33	0 31	0 24	0 26	0 37	0 32	0 31	0 38	0 26	0 27
18	16200660	C	T	0 39	0 26	0 45	0 40	0 56	0 57	0 21	0 50	0 33	0 52	0 54	0 44	0 51	0 33	0 6	0 13	0 19	0 20	0 14	0 26	0 55	0 49	0 14	0 22	0 20	0 15	0 14	0 28	0 38	0 32	0 38	0 14	0 45	0 14	0 27	0 21	0 33	0 31	0 24	0 26	0 37	0 32	0 31	0 38	0 26	0 27
18	16200661	G	A	0 39	0 26	0 45	0 40	0 56	0 57	0 21	0 50	0 33	0 52	0 54	0 44	0 51	0 33	0 6	0 13	0 19	0 20	0 14	0 26	0 55	0 49	0 14	0 22	0 20	0 15	0 14	0 28	0 38	0 32	0 38	0 14	0 45	0 14	0 27	0 21	0 33	0 31	0 24	0 26	0 37	0 32	0 31	0 38	0 26	0 27
18	16200662	T	C	0 40	0 25	0 46	0 40	0 55	0 61	0 21	0 51	0 34	0 53	0 54	0 46	0 52	0 33	0 6	0 13	0 20	0 20	0 18	0 27	0 54	0 50	0 14	0 23	0 21	0 15	0 16	0 28	0 38	0 35	0 37	0 14	15 30	9 5	8 17	22 0	32 0	15 16	18 8	13 13	0 38	0 32	0 31	0 38	0 26	0 28
18	16200669	C	T	0 39	0 23	0 48	0 40	0 55	0 57	0 23	0 49	0 34	0 58	0 54	0 45	0 52	0 35	0 6	0 14	0 21	0 19	0 18	0 30	0 58	0 49	0 14	0 22	0 22	0 15	0 17	0 30	0 35	0 35	0 37	0 14	0 47	0 12	0 26	0 22	0 32	0 31	0 27	0 26	0 38	0 30	0 31	0 36	0 25	0 28
18	16200680	T	A	0 40	0 25	0 48	0 39	0 56	1 57	0 23	0 44	0 33	0 64	0 54	0 47	0 56	0 31	0 4	0 13	0 21	0 18	0 19	0 29	0 56	0 51	0 14	0 24	0 20	0 12	0 13	0 30	0 42	0 36	0 29	0 14	0 42	0 14	0 24	0 23	0 33	0 24	0 27	0 28	0 37	0 30	0 35	0 31	0 25	0 28
18	16200695	C	G	0 39	0 22	0 51	0 45	0 52	0 58	0 25	0 38	0 40	0 65	0 54	0 47	0 46	0 33	0 6	0 14	0 21	0 18	0 16	0 27	0 58	0 45	0 15	0 25	0 22	0 15	0 14	0 30	0 38	0 33	0 33	0 15	0 39	0 15	0 26	0 21	0 36	0 23	0 25	0 31	0 32	0 28	0 35	0 36	0 28	0 29
18	16200718	C	A	0 38	0 22	0 50	0 44	0 52	0 57	0 27	0 43	0 43	0 63	0 59	0 44	0 42	0 38	0 8	0 13	0 19	0 15	0 18	0 20	0 58	0 42	0 19	0 21	0 16	0 21	0 14	0 30	0 33	0 38	0 45	0 14	0 35	0 23	0 23	0 22	0 38	0 25	0 29	0 29	0 31	0 25	0 35	0 37	0 32	0 26
18	16200720	A	G	0 39	0 22	0 51	0 45	0 52	0 55	0 26	0 44	0 42	0 63	0 58	0 44	0 42	0 38	0 8	0 12	0 19	0 14	0 16	0 21	0 57	0 42	0 19	0 20	0 17	0 22	0 15	0 30	19 14	0 38	0 46	0 14	0 34	0 22	0 22	0 22	0 36	0 23	0 27	0 28	0 31	0 25	0 34	0 38	0 32	0 25
18	16200761	C	T	0 47	0 20	0 60	0 57	0 46	0 53	0 20	0 54	0 45	0 56	0 65	0 45	0 36	0 44	0 11	0 14	0 13	0 16	0 15	0 13	0 49	0 42	0 13	0 18	0 12	0 22	0 16	0 26	0 33	0 30	0 46	0 17	0 30	0 21	0 20	0 22	0 26	0 23	0 30	0 21	0 34	0 20	0 31	0 36	0 32	0 23
18	16200766	A	G	0 46	0 22	0 61	0 58	0 48	0 53	0 20	0 52	0 46	0 52	0 62	0 48	0 38	0 47	0 12	0 14	0 15	0 15	0 14	0 11	0 49	1 44	0 15	0 17	0 16	0 21	0 16	0 25	0 32	0 30	1 44	0 17	0 30	0 22	0 20	0 23	0 24	0 28	0 28	0 22	0 35	0 21	0 30	0 37	0 34	0 23
18	16200772	A	T	0 44	0 21	0 57	0 56	0 48	0 57	0 20	0 52	0 48	0 44	0 62	0 50	0 36	0 48	0 12	0 13	0 18	0 16	0 14	0 10	0 51	0 45	0 15	0 18	0 16	0 20	0 16	0 21	0 29	0 28	0 42	0 17	0 31	0 23	0 20	0 22	0 23	0 28	0 29	0 24	0 33	0 21	0 29	0 38	0 35	0 25
18	16200774	TATCAATTA	T	0 40	0 18	0 52	0 52	0 42	0 51	0 19	0 46	0 42	0 40	0 58	0 48	0 34	0 45	0 12	0 10	0 19	0 15	0 13	0 9	0 49	0 43	0 15	0 14	0 15	0 18	0 14	0 20	10 13	11 15	14 19	9 4	0 27	0 23	0 20	0 21	0 25	0 28	0 25	0 23	0 34	0 18	0 24	0 33	0 32	0 22
18	16200805	A	T	0 46	0 18	0 57	0 67	0 51	0 54	0 20	0 52	0 46	0 42	0 60	0 57	0 48	0 48	0 13	0 14	0 20	0 16	0 16	0 14	0 51	0 50	0 18	0 22	0 17	0 16	0 15	0 26	0 32	0 32	1 38	0 17	0 25	0 24	0 22	0 19	0 28	0 26	0 23	0 17	0 31	0 20	0 28	0 32	0 34	0 21
18	16200812	CG	TA	0 44	0 20	0 60	0 62	0 50	0 48	0 15	0 52	0 45	0 39	0 59	0 53	0 45	0 47	0 10	0 13	0 19	0 16	0 15	0 14	0 47	0 50	0 17	0 22	0 19	0 12	0 13	0 22	0 18	0 14	0 12	0 14	0 15	0 0	0 0	0 0	0 0	0 0	0 0	0 0	0 0	0 0	0 0	0 0	0 0	0 0
18	16200813	G	A	0 44	0 20	0 60	0 62	0 50	0 48	0 15	0 52	0 45	0 39	0 59	0 53	0 45	0 47	0 10	0 13	0 19	0 16	0 15	0 14	0 47	0 50	0 17	0 22	0 19	0 12	0 13	0 22	15 18	15 14	19 12	3 14	10 15	24 0	22 0	19 0	29 0	30 0	21 0	16 0	30 0	19 0	26 0	32 0	31 0	22 0
18	16200813	GA	AT	0 44	0 20	0 60	0 62	0 50	0 48	0 15	0 52	0 45	0 39	0 59	0 53	0 45	0 47	0 10	0 13	0 19	0 16	0 15	0 14	0 47	0 50	0 17	0 22	0 19	0 12	0 13	0 22	0 18	0 14	0 12	0 14	0 15	0 0	0 0	0 0	0 0	0 0	0 0	0 0	0 0	0 0	0 0	0 0	0 0	0 0
18	16200813	G	ATA	0 44	0 20	0 60	0 62	0 50	0 48	0 15	0 52	0 45	0 39	0 59	0 53	0 45	0 47	0 10	0 13	0 19	0 16	0 15	0 14	0 47	0 50	0 17	0 22	0 19	0 12	0 13	0 22	0 18	0 14	0 12	0 14	0 15	0 0	0 0	0 0	0 0	0 0	0 0	0 0	0 0	0 0	0 0	0 0	0 0	0 0
18	16200824	CT	C	0 46	0 23	0 56	0 63	0 47	0 50	0 12	0 50	0 43	0 44	0 60	0 49	0 47	0 45	0 10	0 12	0 18	0 19	0 10	0 15	0 51	0 52	0 18	0 25	0 17	0 10	0 12	0 23	12 17	0 30	0 30	0 17	0 32	0 26	0 21	0 17	0 29	0 33	0 19	0 15	0 28	0 19	0 27	0 34	0 35	0 23
18	16200836	C	A	0 43	0 24	0 59	0 64	0 48	0 51	0 11	0 56	0 46	0 47	0 59	0 48	0 56	0 46	0 11	0 14	0 21	0 20	0 11	0 16	0 57	0 49	0 20	0 25	0 17	0 11	0 13	0 28	0 33	0 30	0 34	0 17	0 35	0 24	0 21	0 17	0 30	0 32	0 20	0 15	0 29	0 19	0 22	0 36	0 38	0 22
18	16200837	T	C	0 44	0 24	0 58	0 65	1 47	0 50	0 11	0 56	0 48	0 47	0 59	0 48	0 55	0 47	0 11	0 14	0 21	0 20	0 11	0 15	0 55	0 48	0 19	0 25	0 17	0 12	0 12	0 29	0 33	0 31	0 35	0 17	0 35	0 23	0 21	0 16	0 30	0 33	0 20	0 14	0 29	0 18	0 23	0 34	0 38	0 22
18	16200843	A	T	0 46	0 24	0 56	0 62	0 45	0 50	0 10	0 54	0 46	0 47	0 55	0 47	0 53	0 48	0 10	0 14	0 20	0 20	0 12	0 16	0 54	0 49	0 19	0 25	0 18	0 11	0 13	0 26	0 36	0 31	0 36	0 15	0 34	0 25	0 18	0 18	0 30	0 33	0 20	0 14	0 32	0 21	0 25	0 32	0 39	0 21
18	16200845	G	A	0 45	0 21	0 55	0 58	0 46	0 49	0 10	0 54	0 45	0 44	0 53	0 48	0 51	0 48	0 10	0 15	0 20	0 19	0 11	0 16	0 52	0 49	0 19	0 26	0 19	0 13	0 13	0 25	0 35	0 31	0 36	0 14	0 34	0 24	0 19	0 18	0 29	0 31	0 20	0 14	0 32	0 20	0 25	0 32	0 41	0 21
18	16200849	C	G	0 46	0 21	0 55	0 57	0 46	0 48	0 10	0 52	0 43	0 44	0 54	0 48	0 53	0 48	0 10	0 15	0 21	0 19	0 12	0 17	0 46	0 49	0 21	0 26	0 20	0 13	0 13	0 24	0 36	0 30	0 34	0 14	0 35	0 20	0 20	0 16	0 32	0 32	0 19	0 14	0 29	0 20	0 25	0 35	0 37	0 24
18	16200857	C	T	0 47	0 23	0 55	0 57	0 46	0 54	0 11	0 51	0 42	0 45	0 58	0 50	0 55	0 46	0 9	0 15	0 21	0 17	0 14	0 18	0 46	0 52	0 22	0 26	0 23	0 13	0 12	0 23	0 37	0 28	0 38	0 12	0 34	0 21	0 20	0 17	0 30	0 29	0 17	0 16	0 28	0 22	0 22	0 29	0 36	0 25
18	16200865	C	A	0 49	0 23	0 56	0 59	0 43	0 53	0 13	0 53	0 40	0 48	0 55	0 49	0 55	0 45	0 10	0 19	0 23	0 16	0 13	0 22	0 46	0 51	0 20	0 30	0 19	0 17	0 14	0 25	0 37	0 27	0 40	0 9	0 41	0 17	0 20	0 17	0 31	0 29	0 17	0 17	0 28	0 23	0 21	0 30	0 36	0 25
18	16200866	A	T	0 49	0 24	0 57	0 59	0 45	0 53	0 13	0 54	0 40	0 48	0 57	0 50	0 54	0 45	0 10	0 19	0 22	0 16	0 13	0 23	0 46	0 49	0 19	0 29	0 18	0 17	0 14	0 26	0 37	0 29	0 40	0 10	0 42	0 17	0 19	1 16	0 32	0 27	0 17	0 16	0 26	0 23	0 21	0 29	0 36	0 25
18	16200869	A	C	0 49	0 26	0 55	1 58	0 44	0 54	0 15	0 54	0 39	0 50	0 56	0 46	0 56	0 45	0 10	0 21	0 21	0 15	0 14	0 23	0 44	0 48	0 20	0 29	0 20	0 19	0 14	0 26	0 35	0 28	0 39	0 10	0 41	0 17	0 19	0 19	0 33	0 28	0 16	0 15	0 23	0 21	0 19	0 26	0 34	0 24
18	16200876	TTG	T	0 51	0 24	0 58	0 57	0 39	0 54	7 6	0 53	0 38	0 51	0 55	0 46	0 52	0 44	0 10	0 21	0 17	0 18	0 13	0 22	0 44	0 46	0 18	0 28	0 19	0 17	0 16	0 24	0 18	0 17	0 18	0 8	0 42	0 16	0 18	0 19	0 36	0 27	0 14	0 16	0 24	0 24	0 21	0 30	0 33	0 27
18	16200877	T	A	0 51	0 24	0 58	0 57	0 39	0 54	1 6	0 53	0 38	0 51	0 55	0 46	0 52	0 44	0 10	0 21	0 17	0 18	0 13	0 22	0 44	0 46	0 18	0 28	0 19	0 17	0 16	0 24	16 18	12 17	18 18	2 8	0 42	0 16	0 18	0 19	0 36	0 27	0 14	0 16	0 24	0 24	0 21	0 30	0 33	0 27
18	16200888	G	A	0 53	0 29	0 58	0 60	0 42	0 58	0 16	0 60	0 36	0 51	0 51	0 49	0 52	0 49	0 12	0 21	0 16	0 18	0 14	0 21	0 48	0 47	0 19	0 28	0 20	0 18	0 18	0 23	0 36	0 36	0 37	0 9	0 49	0 19	0 17	0 16	19 18	13 13	0 17	0 17	0 22	0 25	0 23	0 33	0 33	0 26
18	16200906	T	C	0 53	0 28	0 54	0 59	0 45	0 66	0 15	0 54	0 35	0 53	0 60	0 46	0 57	1 46	0 10	0 18	0 19	0 17	0 15	0 23	0 45	0 46	0 19	0 33	0 22	0 19	0 20	0 23	16 20	17 26	19 16	0 10	0 52	0 20	0 17	0 16	0 37	0 21	0 13	0 18	0 26	0 30	0 23	0 33	0 32	0 28
18	16200916	C	T	0 45	0 25	0 52	0 56	0 47	0 68	0 13	0 54	0 36	0 53	0 58	0 46	0 55	0 48	0 9	0 19	0 22	0 17	6 9	6 19	0 46	26 18	0 21	0 32	1 20	0 18	6 14	0 21	34 0	45 0	36 0	11 0	20 27	19 0	15 0	14 0	34 0	18 0	14 0	16 0	27 0	31 0	20 0	29 0	29 0	28 0
18	16200928	C	A	0 42	0 24	0 54	0 54	0 49	0 71	0 17	0 54	0 42	0 50	0 56	0 47	0 54	0 43	0 8	0 22	0 18	0 15	0 19	0 26	0 51	0 47	0 20	0 30	0 23	0 15	0 18	0 22	0 32	0 47	0 33	0 11	0 45	0 17	0 13	0 14	0 35	0 19	0 13	0 18	0 28	0 30	0 23	1 31	0 31	0 27
18	16200932	C	A	0 43	0 25	0 53	0 55	0 50	0 68	0 18	0 52	0 39	0 49	0 57	0 51	0 52	0 43	0 8	0 21	0 21	0 14	0 19	0 24	0 51	0 44	0 19	0 28	0 22	0 16	0 17	0 24	0 33	0 44	0 32	0 12	0 44	8 9	7 7	0 14	0 33	9 9	9 4	11 6	27 0	29 0	24 0	32 0	16 16	27 0
18	16200956	C	A	0 35	0 27	0 59	0 52	0 59	0 62	0 19	0 47	0 45	0 56	0 57	0 56	0 50	0 45	0 9	0 23	0 16	0 14	0 15	0 24	0 54	0 47	0 20	0 22	0 17	0 16	0 15	0 25	19 14	23 25	17 16	1 11	0 39	0 18	0 12	0 17	0 33	0 22	0 14	0 19	0 29	0 25	0 20	0 32	0 30	0 26
18	16200957	A	C	0 35	0 25	0 59	0 52	0 59	0 64	0 19	0 47	0 44	0 57	0 57	0 58	0 50	0 45	0 9	0 22	0 16	0 14	0 15	0 24	0 55	0 46	0 19	0 23	0 18	0 16	0 14	0 27	0 34	0 48	0 32	0 12	0 39	0 18	0 12	0 16	0 33	0 22	0 14	0 19	0 29	0 26	0 20	0 30	0 30	0 26
18	16200961	A	G	0 32	0 24	0 55	0 44	0 56	0 61	0 15	18 29	23 21	0 51	0 56	0 52	0 47	0 40	0 7	0 18	0 13	0 14	0 16	0 18	0 49	0 46	0 20	0 21	0 15	6 7	0 14	0 22	0 0	0 0	0 0	0 0	0 19	0 0	0 0	0 0	0 0	0 0	0 0	0 0	0 0	0 0	0 0	0 0	0 0	0 0
18	16200964	A	T	0 32	0 24	0 55	0 44	0 56	0 61	0 15	0 29	0 21	0 51	0 56	0 52	0 47	0 40	0 7	0 18	0 13	0 14	0 16	0 18	0 49	0 46	0 20	0 21	0 15	0 7	0 14	0 22	33 0	44 0	30 0	12 0	11 19	8 0	11 0	15 0	30 0	19 0	13 0	19 0	25 0	23 0	19 0	26 0	28 0	23 0
18	16200964	ATTA	TTTG	0 32	0 24	0 55	0 44	0 56	0 61	0 15	0 29	0 21	0 51	0 56	0 52	0 47	0 40	0 7	0 18	0 13	0 14	0 16	0 18	0 49	0 46	0 20	0 21	0 15	0 7	0 14	0 22	0 0	0 0	0 0	0 0	0 19	0 0	0 0	0 0	0 0	0 0	0 0	0 0	0 0	0 0	0 0	0 0	0 0	0 0
18	16200973	C	CT	0 26	0 21	0 52	0 38	0 56	0 55	0 13	0 45	0 36	0 44	0 55	0 49	0 45	0 37	0 3	0 17	0 12	0 11	0 17	0 21	0 42	0 48	0 18	0 23	0 15	0 13	0 10	0 19	9 16	17 16	0 31	9 1	0 29	0 15	0 15	0 15	0 31	0 19	0 14	0 17	0 27	0 27	0 19	0 29	0 24	0 23
18	16200979	T	TG	0 26	0 21	0 52	0 38	0 56	0 55	0 13	0 45	0 36	0 44	0 55	0 49	0 45	0 37	0 3	0 17	0 12	0 11	0 17	0 21	0 42	0 48	0 18	0 23	0 15	0 13	0 10	0 19	0 16	0 16	0 31	0 1	0 29	0 15	0 15	0 15	0 31	0 19	0 14	0 17	0 27	0 27	0 19	0 29	0 24	0 23
18	16200985	GA	AG	0 34	0 20	0 56	0 45	0 62	0 59	0 15	0 46	0 39	0 51	0 65	0 51	0 50	0 41	0 6	0 18	0 4	0 6	0 19	0 4	0 47	0 52	0 6	0 12	0 10	0 15	0 8	0 22	0 11	0 19	0 18	0 9	0 16	0 0	0 0	0 0	0 0	0 0	0 0	0 0	0 0	0 0	0 0	0 0	0 0	0 0
18	16200986	A	G	0 34	0 20	0 56	0 45	0 62	0 59	0 15	0 46	0 39	0 51	0 65	0 51	0 50	0 41	0 6	0 18	0 4	0 6	0 19	0 4	0 47	0 52	0 6	0 12	0 10	0 15	0 8	0 22	21 11	18 19	16 18	2 9	14 16	14 0	16 0	20 0	32 0	22 0	16 0	18 0	27 0	29 0	20 0	29 0	24 0	22 0
18	16200986	A	T	0 34	0 20	0 56	0 45	0 62	0 59	0 15	0 46	0 39	0 51	0 65	0 51	0 50	0 41	0 6	0 18	10 4	8 6	0 19	17 4	0 47	0 52	12 6	14 12	6 10	0 15	0 8	0 22	0 11	0 19	0 18	0 9	0 16	0 0	0 0	0 0	0 0	0 0	0 0	0 0	0 0	0 0	0 0	0 0	0 0	0 0
18	16200990	T	C	0 36	0 23	0 56	0 47	0 61	0 59	0 15	0 48	0 40	0 54	0 62	0 51	0 53	0 44	0 6	0 19	0 14	0 15	0 19	0 21	0 48	0 50	0 20	0 26	0 19	0 15	0 9	0 24	0 33	0 38	0 34	0 11	0 27	0 13	0 16	0 19	0 34	0 25	0 19	0 19	0 25	0 27	0 19	0 30	0 25	0 24
18	16201015	A	T	0 42	0 25	0 58	0 41	0 63	0 62	0 18	0 49	0 39	0 52	0 54	0 44	0 46	0 37	0 9	0 20	0 12	0 18	0 19	0 17	0 55	0 47	0 15	0 17	0 19	0 16	0 12	0 23	0 39	0 30	0 33	0 13	0 26	0 13	0 17	0 22	0 36	0 28	0 23	0 21	0 28	0 31	0 20	0 31	0 26	0 20
18	16201035	A	G	0 43	0 26	0 50	0 44	0 57	0 60	0 15	0 49	0 36	1 51	0 58	0 39	0 44	0 35	0 9	0 20	0 8	0 20	0 18	0 19	0 56	0 46	0 16	0 17	0 16	0 18	0 15	0 21	0 39	0 33	0 31	0 13	0 30	0 11	0 21	0 21	0 35	0 31	0 25	0 27	0 27	0 30	0 18	0 28	0 28	0 23
18	16201037	A	G	0 44	0 26	0 49	0 43	0 59	0 62	0 16	0 50	0 37	0 52	0 57	0 39	0 43	0 35	0 8	0 20	0 9	0 20	0 19	0 19	0 58	0 45	0 16	0 17	0 16	0 21	0 15	0 21	0 42	0 34	0 29	0 13	0 30	0 11	0 21	0 23	0 36	0 31	0 25	0 26	0 30	0 33	0 19	0 32	13 15	0 23
18	16201038	A	G	0 44	0 26	0 49	0 43	0 61	0 61	0 16	0 48	0 37	0 53	0 58	0 39	0 42	0 35	0 9	0 20	0 9	0 20	0 19	0 19	0 57	0 44	0 16	0 17	0 16	0 21	0 15	0 22	0 40	0 33	0 30	0 14	0 30	0 11	0 21	0 22	0 34	0 30	0 25	0 27	0 30	0 33	0 19	0 31	0 28	0 23
18	16201059	C	T	0 47	0 24	0 40	0 45	0 56	0 57	0 19	0 53	0 34	0 49	0 58	0 35	0 41	0 38	0 12	0 17	0 13	0 22	0 21	0 17	0 56	0 44	0 14	0 17	0 15	0 17	0 15	0 19	0 41	0 32	15 19	0 14	0 31	0 13	0 23	0 28	0 42	0 33	0 25	0 28	0 25	0 32	0 22	0 30	0 29	0 23
18	16201065	T	TA	0 46	0 22	0 33	0 45	0 50	0 53	0 17	0 49	0 33	0 43	0 51	0 36	0 39	0 33	0 12	0 16	0 13	0 23	0 23	0 14	0 58	0 41	0 15	0 15	0 13	0 17	0 13	0 22	0 22	0 19	0 15	0 12	0 20	0 0	0 0	0 0	0 0	0 0	0 0	0 0	0 0	0 0	0 0	0 0	0 0	0 0
18	16201072	C	T	0 46	0 22	0 33	0 45	0 50	0 53	0 17	0 49	0 33	0 43	0 51	0 36	0 39	0 33	0 12	0 16	0 13	0 23	0 23	0 14	0 58	0 41	0 15	0 15	0 13	0 17	0 13	0 22	14 22	10 19	15 15	1 12	7 20	14 0	23 0	30 0	42 0	29 0	27 0	31 0	26 0	30 0	25 0	32 0	28 0	27 0
18	16201078	TCCAA	ACAAC	0 42	0 23	0 38	0 48	0 53	0 59	0 16	0 49	0 35	0 48	0 51	0 39	0 42	0 36	0 11	0 16	0 13	0 23	0 21	0 15	0 60	0 39	0 17	0 15	0 12	0 17	0 12	0 19	0 36	0 30	0 34	0 15	0 32	0 16	0 22	0 31	0 44	0 28	0 26	0 34	0 26	0 31	0 22	0 37	0 30	0 26
18	16201081	A	G	0 42	0 23	0 38	0 48	0 53	0 59	0 16	0 49	0 35	0 48	0 51	0 39	0 42	0 36	0 11	0 16	0 13	0 23	0 21	0 15	0 60	0 39	0 17	0 15	0 12	0 17	0 12	0 19	0 36	0 30	0 34	0 15	0 32	0 16	0 22	0 31	0 44	0 28	0 26	0 34	0 26	0 31	0 22	0 37	0 30	0 26
18	16201091	A	G	0 43	0 23	0 40	0 53	0 64	0 66	0 18	0 50	0 34	0 50	0 54	0 41	0 44	0 36	0 12	0 19	0 17	0 23	0 26	0 20	0 60	0 39	0 17	0 19	0 9	0 15	0 11	0 16	0 37	0 39	20 20	0 14	0 31	0 18	0 24	0 33	0 50	0 27	0 25	0 35	0 29	0 31	0 23	0 38	0 30	0 26
18	16201092	T	C	0 42	0 23	0 39	0 51	0 65	0 67	0 18	0 49	0 35	0 50	0 54	0 43	0 45	0 37	0 11	0 19	0 17	0 22	0 27	0 21	0 59	0 39	0 17	0 19	0 9	0 15	0 11	0 17	0 36	0 40	0 41	0 14	0 31	0 18	0 21	0 32	0 50	0 27	0 27	0 34	0 31	0 31	0 22	0 37	0 30	0 26
18	16201102	T	C	0 46	0 19	0 42	0 57	0 63	0 61	0 18	0 50	0 35	0 53	0 55	0 43	0 45	0 42	0 11	0 19	0 17	0 22	0 27	0 23	0 60	0 39	0 17	0 21	0 7	0 13	0 12	0 21	0 34	0 37	0 45	0 15	0 36	11 9	13 11	0 29	0 47	14 11	21 14	22 12	32 0	34 0	24 0	34 0	34 0	27 0
18	16201104	T	A	0 46	0 18	0 43	0 62	0 61	0 62	0 17	0 51	0 34	0 53	0 56	0 43	0 47	0 43	0 11	0 18	0 16	0 22	0 27	0 21	0 60	0 39	0 16	0 19	0 6	0 13	0 11	0 20	0 34	0 37	0 47	0 15	0 35	0 18	0 23	0 29	0 47	0 25	0 33	0 34	0 32	0 34	0 23	0 33	0 34	0 28
18	16201106	A	G	0 44	0 18	0 44	0 60	0 60	0 60	0 17	0 51	0 33	0 53	0 57	0 43	0 50	0 46	0 11	0 18	0 17	0 23	0 26	0 21	0 61	0 39	0 17	0 21	0 6	0 12	0 12	0 20	0 35	0 37	0 50	0 15	0 34	0 18	0 26	0 30	0 48	0 25	0 33	0 34	0 31	0 33	0 23	0 34	0 34	0 28
18	16201112	C	T	0 43	0 19	0 44	0 58	0 59	0 55	0 16	0 47	0 33	0 55	0 59	0 44	0 50	0 44	0 11	0 19	0 17	0 23	0 26	0 19	0 59	0 40	0 17	0 21	0 7	0 11	0 11	0 18	0 35	0 40	0 48	0 15	0 34	0 17	0 26	0 29	0 47	0 25	0 33	0 34	0 31	0 33	0 22	0 34	0 33	0 27
18	16201112	C	TA	0 43	0 19	0 44	0 58	0 59	0 55	0 16	0 47	0 33	0 55	0 59	0 44	0 50	0 44	0 11	0 19	0 17	0 23	0 26	0 19	0 59	0 40	0 17	0 21	0 7	0 11	0 11	0 18	0 35	0 40	0 48	0 15	0 34	0 17	0 26	0 29	0 47	0 25	0 33	0 34	0 31	0 33	0 22	0 34	0 33	0 27
18	16201128	C	T	0 48	0 21	0 46	0 58	0 57	0 55	0 20	0 51	0 34	0 55	0 56	0 42	0 55	0 47	0 9	0 17	0 21	0 20	0 31	0 16	0 53	0 41	0 19	0 22	0 12	0 10	0 11	0 19	0 31	0 40	0 53	0 16	0 32	0 19	0 18	0 31	0 46	0 25	0 32	0 39	0 33	0 29	0 22	0 30	0 31	0 31
18	16201131	T	C	0 49	0 22	0 47	0 59	0 60	0 58	0 20	0 51	0 36	0 53	0 58	0 40	0 52	0 48	0 9	0 15	0 21	0 20	0 31	0 17	0 52	0 42	0 20	0 23	0 15	0 13	0 10	0 19	0 29	0 40	0 51	0 17	0 33	0 20	0 20	0 29	0 47	0 25	0 30	0 39	0 33	0 32	0 19	0 30	0 31	0 30
18	16201142	CTTTG	ATTTA	0 43	0 23	0 52	0 59	0 53	0 61	0 17	0 52	0 34	0 52	0 49	0 33	0 52	0 44	0 7	0 11	0 22	0 19	0 28	0 18	0 45	0 38	0 18	0 25	0 14	0 11	0 11	0 15	0 28	0 33	0 47	0 16	0 29	0 20	0 20	0 29	0 43	0 20	0 26	0 38	0 34	0 29	0 23	0 29	0 31	0 30
18	16201148	T	C	0 44	0 24	0 54	0 60	0 56	0 60	0 18	0 53	0 34	0 52	0 51	0 34	0 52	0 43	0 8	0 11	0 21	0 21	0 29	0 18	0 45	0 40	0 20	0 25	0 16	0 12	0 12	0 15	0 30	0 35	0 50	0 15	0 34	0 20	0 20	0 28	0 43	0 18	0 25	0 36	0 35	0 30	0 25	0 30	0 30	0 31
18	16201153	ACA	GCC	0 44	0 20	0 52	0 61	0 52	0 54	0 16	0 48	0 32	0 48	0 48	0 31	0 48	0 39	0 7	0 12	0 18	0 20	0 25	0 18	0 47	0 36	0 21	0 24	0 17	0 12	0 13	0 15	0 0	0 0	0 0	0 0	0 13	0 0	0 0	0 0	0 0	0 0	0 0	0 0	0 0	0 0	0 0	0 0	0 0	0 0
18	16201155	A	C	0 44	0 20	0 52	0 61	0 52	0 54	0 16	0 48	0 32	0 48	0 48	0 31	0 48	0 39	0 7	0 12	0 18	0 20	0 25	0 18	0 47	0 36	0 21	0 24	0 17	0 12	0 13	0 15	30 0	18 0	47 0	16 0	23 13	19 0	19 0	28 0	40 0	16 0	22 0	39 0	32 0	26 0	24 0	31 0	29 0	33 0
18	16201155	ATAA	CTAG	0 44	0 20	0 52	0 61	0 52	0 54	0 16	0 48	0 32	0 48	0 48	0 31	0 48	0 39	0 7	0 12	0 18	0 20	0 25	0 18	0 47	0 36	0 21	0 24	0 17	0 12	0 13	0 15	0 0	16 0	0 0	0 0	0 13	0 0	0 0	0 0	0 0	0 0	0 0	0 0	0 0	0 0	0 0	0 0	0 0	0 0
18	16201169	GTGA	TTGG	0 40	0 16	0 50	0 52	0 49	0 46	0 17	0 47	0 37	0 48	0 56	0 35	0 45	0 39	0 6	0 12	0 17	0 17	0 28	0 19	0 44	0 40	0 18	0 22	0 19	0 11	0 15	0 12	0 21	0 15	0 23	0 13	0 15	5 0	10 0	32 0	18 0	0 0	9 0	16 0	0 0	0 0	0 0	0 0	0 0	0 0
18	16201169	GTGAAGT	TTGGAGC	0 40	0 16	0 50	0 52	0 49	0 46	0 17	0 47	0 37	0 48	0 56	0 35	0 45	0 39	0 6	0 12	0 17	0 17	0 28	0 19	0 44	0 40	0 18	0 22	0 19	0 11	0 15	0 12	0 21	0 15	0 23	0 13	0 15	0 0	0 0	0 0	0 0	0 0	0 0	0 0	0 0	0 0	0 0	0 0	0 0	0 0
18	16201172	A	G	0 40	0 16	0 50	0 52	0 49	0 46	0 17	0 47	0 37	0 48	0 56	0 35	0 45	0 39	0 6	0 12	0 17	0 17	0 28	0 19	0 44	0 40	0 18	0 22	0 19	0 11	0 15	0 12	14 21	16 15	17 23	4 13	18 15	15 0	11 0	0 0	15 0	16 0	16 0	22 0	30 0	24 0	24 0	28 0	29 0	33 0
18	16201179	TG	GC	0 42	0 19	0 57	0 50	0 52	0 48	0 18	0 48	0 38	0 50	0 59	0 40	0 49	0 44	0 5	0 13	0 17	0 17	0 27	0 21	0 43	0 19	0 19	0 27	0 18	0 12	0 16	0 13	1 38	0 30	0 42	0 16	0 35	0 23	0 21	0 35	0 36	0 16	0 25	0 42	0 32	0 24	0 22	0 32	0 30	0 37
18	16201180	G	C	0 42	0 19	0 57	0 50	0 52	0 48	0 18	0 48	0 38	0 50	0 59	0 40	0 49	0 44	0 5	0 13	0 17	0 17	0 27	0 21	0 43	0 19	0 19	0 27	0 18	0 12	0 16	0 13	0 38	0 30	0 42	0 16	0 35	0 23	0 21	0 35	0 36	0 16	0 25	0 42	0 32	0 24	0 22	0 32	0 30	0 37
18	16201180	G	T	0 42	0 19	0 57	0 50	0 52	0 48	0 18	0 48	0 38	0 50	0 59	0 40	0 49	0 44	0 5	0 13	0 17	0 17	0 27	0 21	1 43	23 19	0 19	0 27	0 18	0 12	0 16	0 13	0 38	0 30	0 42	0 16	0 35	0 23	0 21	0 35	0 36	0 16	0 25	0 42	0 32	0 24	0 22	0 32	0 30	0 37
18	16201188	A	G	0 45	0 21	0 62	0 52	0 48	0 49	0 20	0 46	0 42	0 52	0 60	0 40	0 53	0 50	0 7	0 13	0 16	0 18	0 25	0 19	0 49	0 46	0 18	0 28	0 22	0 12	0 17	0 12	0 41	0 33	0 42	0 15	0 38	0 25	0 20	0 35	0 35	0 16	0 26	0 39	0 32	0 22	0 22	0 32	0 31	0 37
18	16201270	T	C	0 43	0 22	0 64	0 64	0 52	0 63	0 22	0 47	0 38	0 46	0 64	0 42	0 48	0 53	0 8	0 17	0 19	0 14	0 17	0 17	0 58	0 53	0 15	0 24	0 15	0 13	0 17	0 21	0 40	0 33	0 44	0 12	0 40	0 22	0 25	0 32	0 24	0 21	0 26	0 33	0 25	0 23	0 25	0 31	0 28	0 34
18	16201277	G	A	0 42	0 23	0 62	0 66	0 51	0 62	0 23	0 49	0 39	0 46	0 64	0 45	0 51	0 50	0 9	0 18	0 19	0 13	0 16	0 16	0 55	0 56	0 18	0 21	0 15	0 14	0 20	0 22	0 43	0 34	0 41	0 10	0 39	0 21	0 24	0 33	0 23	0 21	0 27	0 32	0 26	0 22	0 26	0 35	0 28	0 36
18	16201283	A	G	0 44	0 21	0 56	0 67	0 50	0 58	0 23	0 46	0 41	0 44	0 61	0 45	0 53	0 55	0 9	0 19	0 19	0 14	0 17	0 16	0 50	0 55	0 18	0 21	0 14	0 15	0 19	0 22	0 42	0 38	0 37	0 10	0 36	6 16	15 7	33 0	10 12	0 23	14 13	15 16	0 30	0 22	0 25	0 35	0 29	0 34
18	16201320	A	C	0 39	0 19	0 53	0 58	0 53	0 56	0 21	0 50	0 38	0 58	0 65	0 44	0 45	0 61	0 10	0 20	0 14	0 17	0 18	0 13	0 47	0 52	0 18	0 19	0 11	0 18	0 18	0 20	0 46	0 44	0 34	0 11	0 32	0 24	0 27	0 27	0 27	0 28	0 23	0 26	0 34	0 20	0 29	0 34	0 35	0 31
18	16201332	G	A	0 40	0 19	0 50	0 60	0 47	0 50	0 20	0 47	0 41	0 54	0 59	0 48	0 42	0 62	0 8	0 19	0 13	0 18	0 21	0 13	0 50	0 51	0 22	0 15	0 15	0 24	0 21	0 21	0 46	0 48	0 38	6 5	0 31	0 27	0 25	0 23	0 24	0 28	0 20	0 21	0 35	0 20	0 29	0 31	0 40	0 33
18	16201337	G	A	0 39	0 23	0 49	0 62	0 48	0 47	0 17	0 49	0 36	0 52	0 56	0 46	0 42	0 63	0 7	0 20	0 10	0 19	0 22	0 13	0 50	0 50	0 22	0 17	0 15	0 22	0 23	0 24	0 47	0 49	0 37	0 12	0 31	0 26	0 27	0 24	0 24	0 27	0 20	0 21	0 36	0 19	0 32	0 31	0 38	0 32
18	16201357	ATG	TTT	0 36	0 21	0 51	0 62	0 49	0 56	0 19	0 49	0 41	0 52	0 60	0 43	0 51	0 60	0 7	0 19	0 13	0 19	0 22	0 18	0 51	0 49	0 20	0 19	0 17	0 21	0 25	0 23	0 40	0 42	0 31	0 13	0 33	0 25	0 21	0 25	0 28	0 24	0 19	0 23	0 36	0 19	0 29	0 30	0 37	0 34
18	16201364	T	C	0 33	0 22	0 50	0 63	0 51	0 56	0 21	0 48	0 44	0 56	0 62	0 47	0 53	0 61	0 7	0 18	0 15	0 17	0 22	0 18	0 52	0 51	0 19	0 19	0 18	0 20	0 22	0 23	0 44	0 43	0 35	0 13	0 34	0 28	0 20	0 25	0 29	0 27	0 19	0 22	0 34	0 20	0 29	0 30	0 37	0 33
18	16201378	G	A	0 37	0 25	0 49	0 54	0 52	0 56	0 21	0 51	0 43	0 57	0 67	0 45	0 59	0 62	0 8	0 15	0 14	0 16	0 23	0 18	0 59	0 54	0 16	0 26	0 17	0 16	0 20	0 23	0 39	0 40	0 43	0 15	0 37	0 30	0 20	0 24	0 26	0 30	0 18	0 23	0 35	0 21	0 31	0 31	0 40	0 32
18	16201380	T	C	0 38	0 25	0 49	0 53	0 52	0 55	0 20	0 49	0 44	0 58	0 67	0 46	0 59	0 59	0 8	0 15	0 14	0 16	0 22	0 18	0 58	0 52	0 16	0 24	0 17	0 16	0 20	0 23	0 38	0 40	0 44	0 15	0 37	0 31	0 20	0 24	0 28	0 31	0 19	0 23	0 35	0 23	0 31	0 30	0 41	0 32
18	16201386	TAG	T	0 39	0 25	0 46	0 53	0 50	0 55	0 19	0 47	0 36	0 50	0 66	0 41	0 55	0 56	0 8	0 13	0 15	0 14	0 23	0 21	0 60	0 52	0 16	0 25	0 18	0 16	0 19	0 25	12 27	16 17	24 18	7 6	0 36	0 31	0 19	0 24	0 25	0 31	0 18	0 23	0 35	0 22	0 31	0 31	0 42	0 33
18	16201393	ATTT	GTTG	0 34	0 25	0 48	0 51	0 44	0 52	0 18	0 49	0 38	0 52	0 69	0 46	0 57	0 54	0 7	0 14	0 16	0 16	0 21	0 20	0 59	0 51	0 17	0 26	0 19	0 16	0 18	0 26	0 0	0 0	0 0	0 0	0 21	0 0	0 0	0 0	0 0	0 0	0 0	0 0	0 0	0 0	0 0	0 0	0 0	0 0
18	16201396	T	G	0 34	0 25	0 48	0 51	0 44	0 52	0 18	0 49	0 38	0 52	0 69	0 46	0 57	0 54	0 7	0 14	0 16	0 16	0 21	0 20	0 59	0 51	0 17	0 26	0 19	0 16	0 18	0 26	40 0	39 0	49 0	13 0	20 21	32 0	19 0	24 0	25 0	29 0	18 0	23 0	36 0	22 0	29 0	32 0	40 0	33 0
18	16201409	ACAAAATCTAGACTCTCCAGT	A	0 36	0 22	0 39	0 46	0 41	0 42	0 17	0 45	0 34	0 40	0 58	0 39	0 55	0 40	0 5	0 7	0 15	0 13	0 15	0 18	0 51	0 43	0 10	0 17	0 14	0 10	0 13	0 21	0 34	0 39	0 42	0 11	0 31	0 30	0 21	0 23	0 25	0 22	0 14	0 20	0 30	0 13	0 28	0 25	0 37	0 27
18	16201416	C	A	0 36	0 22	0 39	0 46	0 41	0 42	0 17	0 45	0 34	0 40	0 58	0 39	0 55	0 40	0 5	0 7	0 15	0 13	0 15	0 18	0 51	0 43	0 10	0 17	0 14	0 10	0 13	0 21	0 34	0 39	0 42	0 11	0 31	0 30	0 21	0 23	0 25	0 22	0 14	0 20	0 30	0 13	0 28	0 25	0 37	0 27
18	16201428	G	A	0 36	0 22	0 39	0 46	0 41	0 42	0 17	0 45	0 34	0 40	0 58	0 39	0 55	0 40	0 5	0 7	0 15	0 13	0 15	0 18	0 51	0 43	0 10	0 17	0 14	0 10	0 13	0 21	0 34	0 39	0 42	0 11	0 31	0 30	0 21	0 23	0 25	0 22	0 14	0 20	0 30	0 13	0 28	0 25	0 37	0 27
18	16201453	G	A	0 52	0 26	0 51	0 60	0 66	0 52	0 23	0 51	0 42	0 54	0 65	0 54	0 47	0 49	0 10	0 9	0 20	0 16	0 24	0 20	0 61	0 42	0 16	0 21	0 11	0 11	0 18	0 18	0 37	0 51	0 57	0 10	0 38	0 35	0 26	0 27	16 19	10 16	0 19	0 20	0 31	0 18	0 30	0 29	0 29	0 24
18	16201458	C	G	0 50	0 24	0 50	0 61	0 63	0 50	0 21	0 51	0 42	0 51	0 70	0 53	0 45	0 47	0 10	0 9	0 18	0 15	0 24	0 21	0 62	0 45	1 20	0 23	0 10	0 11	0 20	0 18	0 17	0 52	0 56	0 11	0 39	0 36	0 24	0 25	0 33	0 25	0 19	0 22	0 31	0 17	0 28	0 29	0 27	0 23
18	16201458	C	T	0 50	0 24	0 50	0 61	0 63	0 50	0 21	0 51	0 42	0 51	0 70	0 53	0 45	0 47	0 10	0 9	0 18	0 15	0 24	0 21	0 62	0 45	0 20	0 23	0 10	0 11	0 20	0 18	19 17	0 52	0 56	0 11	0 39	0 36	0 24	0 25	0 33	0 25	0 19	0 22	0 31	0 17	0 28	0 29	0 27	0 23
18	16201516	G	A	0 42	0 19	0 53	0 55	0 56	0 47	0 19	0 45	0 39	0 52	0 68	0 38	0 28	0 45	0 8	0 9	0 19	0 11	0 23	0 18	0 55	0 38	0 27	0 25	0 11	0 6	0 22	0 13	0 29	0 53	23 24	0 9	0 37	0 29	0 17	0 22	0 33	0 23	0 20	0 24	0 39	0 18	0 27	0 37	0 31	0 25
18	16201553	C	T	0 38	0 13	0 57	0 54	0 51	0 49	0 18	0 42	0 45	0 56	0 74	0 42	0 40	0 44	0 8	0 12	0 19	0 12	0 16	0 21	0 55	0 43	0 27	0 21	0 17	0 7	0 21	0 14	0 38	0 45	0 44	0 10	0 36	0 23	0 13	0 20	0 34	0 29	0 22	0 22	0 44	0 19	0 31	0 35	0 28	0 29
18	16201565	C	T	0 39	0 17	0 56	0 55	0 51	0 52	0 17	0 45	0 50	0 58	0 71	0 49	0 46	0 39	0 5	0 11	0 21	0 14	0 17	0 22	0 57	0 39	0 24	0 20	0 17	0 8	0 22	0 17	0 41	0 39	0 44	0 10	0 36	0 25	0 12	0 21	0 35	0 32	0 24	0 21	0 46	0 24	0 36	0 42	0 31	0 33
18	16201566	G	A	0 37	0 17	0 59	0 55	0 50	0 51	0 16	0 45	0 47	0 58	0 72	0 50	0 48	0 40	0 5	0 12	0 22	0 15	0 16	0 22	0 59	0 36	0 23	0 20	0 17	0 8	0 20	0 18	0 39	0 38	0 43	0 10	0 37	0 25	0 12	0 19	0 35	0 33	0 25	0 21	0 47	0 24	0 36	0 42	0 30	0 34
18	16201567	T	A	0 38	0 17	0 59	0 54	0 48	0 51	0 15	0 46	0 49	0 57	0 72	0 49	0 49	0 39	0 5	0 12	0 22	0 15	0 16	0 22	0 58	0 35	0 22	0 18	0 18	0 8	0 18	0 18	0 39	0 38	0 42	0 9	0 35	0 25	0 13	0 20	0 35	0 33	0 25	0 21	0 45	0 24	0 36	0 40	0 32	0 34
18	16201569	C	T	0 38	0 21	0 60	0 53	0 51	0 54	0 17	0 48	0 47	0 55	0 74	0 49	0 47	0 41	0 5	0 11	0 21	0 15	0 17	0 21	0 60	0 36	0 23	0 18	0 19	0 9	0 20	0 18	0 40	0 39	0 43	0 10	0 36	0 25	0 13	0 21	0 35	0 33	0 25	0 20	0 44	0 24	0 36	0 42	0 30	0 32
18	16201571	T	A	0 39	0 21	0 61	0 54	0 51	0 53	0 16	0 49	0 47	0 55	0 73	0 51	0 48	0 41	0 5	0 10	0 20	0 15	0 17	0 20	0 58	0 35	0 22	0 15	0 19	0 11	0 21	0 18	0 39	0 36	19 23	0 11	0 35	0 26	0 13	0 19	0 35	0 32	0 25	0 20	0 46	0 24	0 36	0 41	0 34	0 33
18	16201582	C	G	0 39	0 21	0 59	0 51	0 50	0 52	0 16	0 48	0 46	0 56	0 72	0 51	0 49	0 44	0 5	0 13	0 21	0 16	0 15	0 17	0 50	0 32	0 23	0 16	0 18	0 10	0 27	0 18	0 35	0 29	19 22	0 14	0 33	0 21	0 14	0 22	0 32	0 30	0 25	0 23	0 45	0 23	0 37	0 42	0 35	0 33
18	16201591	T	A	0 36	0 19	0 56	0 52	0 48	0 54	0 15	0 48	0 46	0 53	0 74	0 54	0 50	0 47	0 4	0 16	0 23	0 19	0 17	0 17	0 51	0 30	0 21	0 16	0 20	0 15	0 26	0 21	0 37	0 27	0 44	0 14	0 34	10 10	7 6	0 21	0 31	15 18	17 8	13 10	47 0	25 0	38 0	42 0	17 19	35 0
18	16201604	T	C	0 36	0 19	0 51	0 51	0 47	0 59	0 14	0 50	0 43	0 51	0 75	0 53	0 49	0 45	0 5	0 15	0 21	0 20	0 16	0 20	0 53	0 30	0 19	0 17	0 21	0 14	0 25	0 25	0 43	0 25	0 39	0 12	0 35	0 20	0 13	0 21	0 30	0 33	0 25	0 24	0 42	0 21	0 36	0 40	0 36	0 34
18	16201621	T	C	0 35	0 19	0 48	0 56	0 54	0 53	0 14	0 47	0 39	0 52	0 69	0 54	0 57	0 49	0 5	0 16	0 18	0 21	0 16	0 20	0 47	0 34	0 16	0 16	0 19	0 16	0 25	0 24	19 22	12 15	22 17	9 1	0 38	0 17	0 14	0 22	0 30	0 32	0 19	0 25	0 38	0 21	0 32	0 36	0 35	1 25
18	16201624	C	T	0 36	0 19	0 44	0 53	0 53	0 53	0 13	0 45	0 40	0 51	0 71	0 55	0 53	0 46	0 4	0 17	0 17	0 21	0 17	0 19	0 48	0 35	0 17	0 16	0 20	0 16	0 26	0 22	0 40	0 26	0 36	0 10	0 38	0 17	0 14	0 21	0 31	0 33	0 22	0 28	1 36	0 22	0 32	0 37	0 34	0 29
18	16201628	A	C	0 34	0 18	0 43	0 54	0 53	0 52	0 13	0 46	0 40	0 46	0 72	0 56	0 55	0 46	0 4	0 16	0 17	0 21	0 18	0 20	0 46	0 37	0 17	0 16	0 21	0 16	0 24	0 22	0 41	0 28	0 37	0 10	0 40	0 16	0 15	0 22	0 29	0 33	0 22	0 28	0 37	0 22	0 35	0 36	0 35	0 28
18	16201634	A	C	0 33	0 19	0 42	0 52	0 52	0 53	0 16	0 50	0 39	0 49	0 66	0 55	0 55	0 50	0 4	0 16	0 16	0 21	0 19	0 19	0 48	0 35	0 17	0 15	0 19	0 15	0 24	0 21	0 40	0 26	0 36	0 9	0 40	0 16	0 15	0 23	0 29	0 36	0 21	0 30	0 40	0 23	0 37	0 35	0 33	0 29
18	16201660	A	C	0 33	0 24	0 41	0 50	0 50	0 54	0 19	0 49	0 44	0 48	0 77	0 53	0 56	0 53	0 2	0 15	0 13	0 20	0 19	0 25	0 52	0 42	0 14	0 17	0 21	0 16	0 21	0 21	0 43	0 30	0 37	0 9	0 34	12 5	10 4	0 26	0 28	19 21	9 12	16 12	36 0	23 0	39 0	38 0	14 15	29 0
18	16201670	G	A	0 36	0 23	0 38	0 46	0 53	0 59	0 19	0 48	0 44	0 49	0 75	0 52	0 53	0 52	0 3	0 15	0 13	0 17	0 19	0 27	0 52	0 43	0 13	0 23	0 21	0 14	0 21	0 22	0 43	0 35	0 38	0 10	0 37	12 7	11 5	0 27	0 29	17 21	8 12	15 12	37 0	21 0	39 0	36 0	14 14	25 0
18	16201685	TG	AA	0 34	0 25	0 45	0 47	0 51	0 49	0 21	0 41	0 50	0 48	0 69	0 48	0 54	0 50	0 4	0 11	0 14	0 16	6 9	0 27	0 50	0 44	0 12	0 23	0 23	0 14	0 18	0 22	0 40	0 35	0 41	0 9	0 40	0 24	0 17	0 28	0 32	0 43	0 19	0 28	0 41	0 23	0 40	0 41	0 30	0 25
18	16201706	G	A	0 34	0 25	0 45	0 51	0 55	0 56	0 22	0 43	0 49	0 52	0 67	0 46	0 52	0 50	0 3	0 12	0 15	0 14	0 18	0 27	0 57	0 45	0 18	0 26	0 25	0 14	0 22	0 25	0 37	0 37	0 37	0 9	0 39	0 26	0 18	0 31	0 26	0 34	0 18	0 27	0 38	0 20	0 34	0 39	0 26	0 25
18	16201707	T	C	0 34	0 26	0 46	0 50	0 56	0 57	0 20	0 43	0 50	0 52	0 67	0 44	0 52	0 48	0 3	0 12	0 14	0 14	0 17	0 27	0 57	0 46	0 18	0 27	0 25	0 16	0 21	0 25	0 37	0 36	0 36	0 8	0 39	0 26	0 18	0 31	0 26	0 34	0 18	0 27	0 36	0 21	0 34	0 39	0 27	0 25
18	16201711	C	A	0 35	0 25	0 45	0 49	0 55	0 58	0 20	0 41	0 51	0 51	0 70	0 45	0 48	0 49	0 2	0 12	0 14	0 12	0 14	0 27	0 56	25 20	0 19	0 28	0 23	0 16	0 22	0 26	0 36	0 38	0 38	0 9	0 38	0 25	0 19	0 31	0 26	0 34	0 18	0 30	0 39	0 22	0 37	0 40	0 28	0 25
18	16201718	G	A	0 36	0 27	0 46	0 50	0 54	0 62	0 20	0 39	0 50	0 53	0 70	0 45	0 47	0 48	0 2	0 12	0 14	0 10	0 14	0 23	0 57	0 41	0 19	0 30	0 23	0 16	0 21	0 27	0 36	0 37	0 36	0 8	0 37	0 27	0 18	0 29	0 28	0 33	0 17	0 32	0 39	0 19	0 36	0 39	0 28	0 22
18	16201723	C	G	0 33	0 26	0 48	0 50	0 60	0 57	0 22	0 41	0 47	0 53	0 68	0 43	0 46	0 45	0 2	0 10	0 15	0 10	0 13	0 24	0 54	0 40	0 19	0 29	0 22	0 15	0 23	0 27	0 39	0 40	0 39	0 7	0 38	0 26	0 17	0 29	0 29	0 32	0 17	0 32	0 42	0 21	0 36	0 42	0 27	0 23
18	16201747	A	G	0 29	0 27	0 50	0 53	0 60	0 53	0 19	0 38	0 41	0 53	0 68	0 44	0 37	0 36	0 2	0 7	0 15	0 11	0 15	0 21	0 52	0 38	0 17	0 27	0 17	0 14	0 22	0 25	0 30	0 38	0 38	0 6	0 36	0 31	0 19	0 26	0 26	0 36	0 20	0 30	0 42	0 23	0 38	0 44	0 27	0 26
18	16201750	T	C	0 31	0 26	0 51	0 54	0 60	0 49	0 19	0 38	0 43	0 52	0 67	0 41	1 39	0 35	0 3	0 8	0 15	0 10	0 15	0 20	0 53	0 36	0 17	0 27	0 16	0 15	0 21	0 24	0 31	0 39	0 38	0 6	0 36	0 28	0 19	0 25	0 26	0 36	0 21	0 30	0 45	0 23	0 36	0 44	0 26	0 26
18	16201755	G	C	0 36	0 24	0 52	0 56	0 57	0 50	0 19	0 40	0 40	0 48	0 62	0 45	0 41	0 32	0 3	0 9	0 14	0 10	0 14	0 19	0 53	0 37	0 17	0 25	0 15	0 16	0 21	0 24	0 28	0 39	0 36	0 6	0 34	0 29	0 21	0 26	0 25	0 35	0 21	0 30	0 46	0 24	0 40	0 45	0 28	0 26
18	16201766	G	A	0 36	0 24	0 56	0 58	0 59	0 49	0 18	0 40	0 37	0 55	0 59	0 50	0 38	0 35	0 3	0 12	0 14	0 10	0 15	0 15	1 52	0 35	0 18	0 21	0 14	0 14	0 17	0 21	0 30	0 42	0 36	0 6	0 38	0 31	0 19	0 27	11 14	20 17	0 24	0 25	0 46	0 22	0 42	0 46	0 26	0 26
18	16201770	C	A	0 36	0 22	0 57	0 58	0 56	0 48	0 18	0 38	1 36	0 55	0 61	0 51	0 40	0 36	0 4	0 14	0 15	0 9	0 13	0 16	0 52	0 35	0 21	0 21	0 12	0 15	0 17	0 21	13 20	22 22	21 15	5 1	0 38	0 32	0 20	0 29	0 23	0 36	0 27	0 25	0 45	0 25	0 42	0 46	0 24	0 27
18	16201771	G	A	0 36	0 23	0 58	0 58	0 56	0 50	0 18	0 39	0 37	0 54	0 62	0 51	0 41	0 36	0 4	0 13	0 13	0 9	0 14	0 16	0 53	0 35	0 22	0 22	0 12	0 14	0 16	0 22	0 33	0 44	0 36	0 5	0 37	0 34	0 20	0 29	0 24	0 36	0 26	0 24	0 45	0 24	0 42	0 47	0 24	0 27
18	16201809	GC	TG	0 33	0 28	0 53	0 66	0 56	0 43	0 19	0 48	0 34	0 55	0 68	0 59	0 38	0 32	0 6	0 14	0 22	0 14	0 19	0 17	0 55	0 42	0 24	0 18	0 8	0 12	0 12	0 23	0 39	0 49	0 48	0 3	0 40	0 37	0 26	0 24	0 27	0 29	0 28	0 28	0 39	0 23	0 35	0 39	0 29	0 28
18	16201810	C	G	0 33	0 28	0 53	0 66	0 56	0 43	0 19	0 48	0 34	0 55	0 68	0 59	0 38	0 32	0 6	0 14	0 22	0 14	0 19	0 17	0 55	0 42	0 24	0 18	0 8	0 12	0 12	0 23	0 39	0 49	0 48	0 3	0 40	0 37	0 26	0 24	0 27	0 29	0 28	0 28	0 39	0 23	0 35	0 39	0 29	0 28
18	16201816	TTTTG	ATTTT	0 32	0 28	0 50	0 60	0 45	0 39	0 14	0 43	0 30	0 51	0 66	0 48	0 32	0 31	0 7	0 15	0 18	0 13	0 16	0 15	0 47	0 41	0 22	0 15	0 9	0 11	0 10	0 20	0 41	0 44	0 45	0 3	0 33	0 33	0 26	0 18	0 25	0 26	0 26	0 22	0 37	0 23	0 32	0 36	0 29	0 25
18	16201816	TTTTGTTT	ATTTTTTC	0 32	0 28	0 50	0 60	0 45	0 39	0 14	0 43	0 30	0 51	0 66	0 48	0 32	0 31	0 7	0 15	0 18	0 13	0 16	0 15	0 47	0 41	0 22	0 15	0 9	0 11	0 10	0 20	0 41	0 44	0 45	0 3	0 33	0 33	0 26	0 18	0 25	0 26	0 26	0 22	0 37	0 23	0 32	0 36	0 29	0 25
18	16201820	GTTTTG	TTTTTT	0 32	0 28	0 50	0 60	0 45	0 39	0 14	0 43	0 30	0 51	0 66	0 48	0 32	0 31	0 7	0 15	0 18	0 13	0 16	0 15	0 47	0 41	0 22	0 15	0 9	0 11	0 10	0 20	0 41	0 44	0 45	0 3	0 33	0 33	0 26	0 18	0 25	0 26	0 26	0 22	0 37	0 23	0 32	0 36	0 29	0 25
18	16201820	GTTTTG	TTTTTTT	0 32	0 28	0 50	0 60	0 45	0 39	0 14	0 43	0 30	0 51	0 66	0 48	0 32	0 31	0 7	0 15	0 18	0 13	0 16	0 15	0 47	0 41	0 22	0 15	0 9	0 11	0 10	0 20	0 41	0 44	0 45	0 3	0 33	0 33	0 26	0 18	0 25	0 26	0 26	0 22	0 37	0 23	0 32	0 36	0 29	0 25
18	16201824	T	C	0 32	0 28	0 50	0 60	0 45	0 39	0 14	0 43	0 30	0 51	0 66	0 48	0 32	0 31	0 7	0 15	0 18	0 13	0 16	0 15	0 47	0 41	0 22	0 15	0 9	0 11	0 10	0 20	0 41	0 44	0 45	0 3	0 33	0 33	0 26	0 18	0 25	0 26	0 26	0 22	0 37	0 23	0 32	0 36	0 29	0 25
18	16201830	TAACC	CAA	0 35	0 31	0 50	0 61	0 45	0 42	0 14	0 48	0 31	0 50	0 74	0 52	0 33	0 32	0 8	0 16	0 17	0 14	0 15	0 17	0 56	0 37	0 21	0 17	0 10	0 10	0 11	0 18	0 34	0 46	0 54	0 5	0 37	0 32	0 25	0 22	0 24	0 24	0 24	0 24	0 27	0 24	0 35	0 36	0 29	0 28
18	16201838	T	C	0 35	0 31	0 50	0 61	0 45	0 42	0 14	0 48	0 31	0 50	0 74	0 52	0 33	0 32	0 8	0 16	0 17	0 14	0 15	0 17	0 56	0 37	0 21	0 17	0 10	0 10	0 11	0 18	0 34	0 46	0 54	0 5	0 37	0 32	0 25	0 22	0 24	0 24	0 24	0 24	0 27	0 24	0 35	0 36	0 29	0 28
18	16201839	G	A	0 41	0 32	0 55	0 67	0 50	0 51	0 12	0 51	0 39	0 54	1 75	0 56	0 33	0 38	0 9	0 19	15 3	6 11	0 17	9 10	0 60	0 42	22 0	19 0	10 0	5 5	6 10	8 10	0 32	0 49	0 60	0 4	0 39	0 34	0 26	0 23	0 27	0 27	0 24	0 25	0 30	0 24	0 37	0 37	0 30	0 29
18	16201849	T	A	0 43	0 33	0 50	0 68	0 54	0 55	0 12	0 52	0 43	0 53	0 74	0 62	0 27	0 43	0 9	0 18	0 17	0 20	0 16	0 18	0 66	0 41	0 22	0 22	0 9	0 11	0 17	0 19	14 17	22 26	35 22	4 2	0 39	0 32	0 26	0 22	0 26	0 26	0 25	0 25	0 31	0 24	0 38	0 37	0 32	0 25
18	16201853	T	C	0 39	0 30	0 51	0 68	0 52	0 59	0 11	0 49	0 43	0 54	0 71	0 59	0 25	0 47	0 8	0 17	0 19	0 20	0 17	0 18	0 64	0 41	0 22	0 24	0 10	0 10	0 17	0 19	0 31	0 47	0 57	0 6	0 37	0 33	0 27	0 21	0 26	0 25	0 26	0 23	0 32	0 22	0 37	0 40	0 33	0 24
18	16201860	C	T	0 33	0 30	0 48	0 67	0 49	0 57	0 12	0 53	0 44	0 50	0 68	0 56	0 21	0 47	0 8	0 17	0 19	0 19	0 16	0 17	0 63	0 41	0 21	0 23	0 11	0 12	0 18	0 20	0 30	0 43	0 53	0 6	0 36	0 33	0 26	0 21	0 29	0 24	0 25	0 21	0 32	0 23	0 35	0 37	0 32	0 23
18	16201866	A	T	0 34	0 27	0 53	0 72	0 53	0 61	0 12	0 50	0 42	0 46	0 65	0 59	0 26	0 47	0 7	0 16	0 19	0 20	0 16	0 19	0 62	0 42	0 21	0 21	0 14	0 12	0 18	0 19	0 30	26 24	0 50	2 4	0 32	0 32	0 27	0 24	0 28	0 25	0 24	0 20	0 34	0 25	0 34	0 37	0 33	0 23
18	16201869	G	A	0 34	0 26	0 53	0 72	0 54	0 58	0 13	0 50	0 43	0 47	0 63	0 60	0 25	0 48	0 6	0 15	0 18	0 20	0 16	0 18	0 60	0 41	0 19	0 24	0 14	0 11	0 18	0 19	0 31	0 52	0 49	0 7	0 32	0 32	0 27	0 24	0 27	0 25	0 23	0 19	0 32	0 26	0 35	0 35	0 32	0 23
18	16201873	A	G	0 34	0 27	0 56	0 75	0 57	0 58	0 14	0 48	0 43	0 49	0 66	0 63	0 24	0 48	0 6	0 14	0 18	0 20	0 15	0 19	0 61	0 42	0 20	0 22	0 14	0 9	0 19	0 16	0 32	0 49	0 50	0 6	0 32	0 35	0 29	0 24	0 26	0 26	0 23	0 19	0 29	0 24	0 35	0 33	0 31	0 23
18	16201874	A	T	0 34	0 28	0 56	0 76	0 58	0 58	0 14	0 47	0 45	0 49	0 64	0 63	0 24	0 47	0 6	0 15	0 19	0 20	0 15	0 19	0 62	0 42	0 20	0 22	0 14	0 10	0 19	0 16	0 33	0 50	0 47	0 7	0 34	0 35	0 26	0 24	0 26	0 25	0 22	0 19	0 29	0 23	0 36	0 31	0 32	0 23
18	16201881	T	C	0 32	0 27	0 52	0 71	0 57	0 52	0 15	0 47	0 45	0 46	0 67	0 63	0 28	0 49	0 5	0 14	0 15	0 21	0 13	0 16	0 62	0 42	0 18	0 19	0 14	0 9	0 22	0 14	0 33	0 44	0 46	0 6	0 33	0 36	0 26	0 27	0 28	0 25	0 20	0 18	0 25	0 23	0 38	0 28	0 30	0 20
18	16201890	T	A	0 32	0 25	0 52	0 68	0 57	0 57	0 15	0 47	0 46	0 48	0 63	0 64	0 30	0 47	0 5	0 16	0 14	0 23	0 16	0 16	0 63	0 39	0 17	0 17	0 15	0 9	0 24	0 14	0 30	0 48	0 47	0 6	0 34	0 35	0 26	0 27	0 28	0 25	0 19	0 19	0 26	0 20	0 38	0 29	0 31	0 18
18	16201891	A	T	0 32	0 24	0 52	0 69	0 58	0 57	0 15	0 46	0 46	0 47	0 65	0 66	0 30	0 46	0 6	0 16	0 14	0 23	0 16	0 17	0 62	0 38	0 17	0 18	0 15	0 9	0 23	0 13	0 30	0 49	0 47	0 6	0 33	0 35	0 26	0 30	0 29	0 25	0 19	0 18	0 27	0 20	0 39	0 28	0 32	0 18
18	16201896	G	A	0 35	0 23	0 54	0 73	0 57	0 60	0 18	0 48	0 45	0 46	0 63	0 68	0 28	0 45	0 5	0 15	0 13	0 22	0 15	0 18	0 63	0 37	0 17	0 18	0 14	0 10	0 23	0 11	0 27	0 47	0 45	0 6	0 33	0 34	0 25	0 29	0 28	0 26	0 18	0 18	0 25	0 21	0 37	0 32	0 34	0 18
18	16201908	T	A	0 41	0 18	0 57	0 72	0 60	0 65	0 17	0 51	0 42	0 49	0 69	0 63	0 28	0 46	0 6	0 16	0 10	0 22	0 15	0 18	0 59	0 32	0 17	0 18	0 18	0 10	0 22	0 11	0 22	0 45	0 45	0 5	0 30	0 36	0 24	0 31	0 25	0 25	0 14	0 19	0 25	0 20	0 33	0 31	0 33	0 17
18	16201908	T	C	0 41	0 18	0 57	0 72	0 60	0 65	0 17	0 51	0 42	0 49	0 69	0 63	0 28	0 46	0 6	0 16	0 10	0 22	0 15	0 18	0 59	0 32	0 17	0 18	0 18	0 10	0 22	0 11	0 22	0 45	0 45	0 5	0 30	0 36	0 24	0 31	0 25	0 25	0 14	0 19	0 25	0 20	0 33	0 31	0 33	0 17
18	16201911	G	A	0 40	0 17	0 55	0 73	0 62	0 67	0 17	0 55	0 43	0 50	0 68	0 62	0 29	0 48	0 6	0 13	0 12	0 24	0 15	0 18	0 56	0 28	0 17	0 19	0 18	0 10	0 22	0 11	0 22	0 43	0 37	0 6	0 29	0 36	0 24	0 30	0 25	0 23	0 13	0 18	0 25	0 22	0 32	0 31	15 20	0 17
18	16201918	A	G	0 40	0 17	0 60	0 67	0 63	0 65	0 18	0 57	0 46	0 49	0 66	0 59	0 32	0 50	0 5	0 12	0 12	0 23	0 15	0 17	0 56	0 30	0 20	0 20	0 18	0 12	0 21	0 13	0 22	0 42	0 34	0 6	0 26	0 34	0 24	0 28	0 28	0 25	0 14	0 18	0 27	0 22	0 34	0 31	16 20	0 17
18	16201920	G	A	0 40	0 15	0 62	0 71	0 62	0 62	0 17	0 57	0 46	0 49	0 65	0 60	0 32	0 52	0 5	0 13	0 13	0 26	0 15	0 18	0 57	0 30	0 20	0 20	0 19	0 12	0 22	0 14	0 22	0 41	0 32	0 5	0 25	0 33	0 24	0 27	0 27	0 26	0 11	0 16	0 27	0 19	0 34	0 29	0 35	0 17
18	16201928	ATATGCATT	GTATACATG	0 22	0 9	0 33	0 34	0 32	0 31	0 10	0 30	0 21	0 28	0 37	0 17	0 24	0 26	0 3	0 2	0 6	0 16	0 7	0 9	0 24	0 18	0 12	0 10	0 13	0 10	0 10	0 10	0 0	0 0	0 0	0 0	0 11	0 0	0 0	0 0	0 0	0 0	0 0	0 0	0 0	0 0	0 0	0 0	0 0	0 0
18	16201928	ATATGCATT	GTATGCATG	0 22	0 9	0 33	0 34	0 32	0 31	0 10	0 30	0 21	0 28	0 37	0 17	0 24	0 26	0 3	0 2	0 6	0 16	0 7	0 9	0 24	0 18	0 12	0 10	0 13	0 10	0 10	0 10	0 0	0 0	0 0	0 0	0 11	0 0	0 0	0 0	0 0	0 0	0 0	0 0	0 0	0 0	0 0	0 0	0 0	0 0
18	16201936	T	G	0 22	0 9	0 33	0 34	0 32	0 31	0 10	0 30	0 21	0 28	0 37	0 17	0 24	0 26	0 3	0 2	0 6	0 16	0 7	0 9	0 24	0 18	0 12	0 10	0 13	0 10	0 10	0 10	0 0	7 0	9 0	3 0	6 11	24 0	13 0	21 0	18 0	21 0	5 0	13 0	22 0	13 0	29 0	25 0	27 0	11 0
18	16201936	TGAGATATAATTAGTTGTATCATAATCAAACTAAAC	GGAG	0 22	0 9	0 33	0 34	0 32	0 31	0 10	0 30	0 21	0 28	0 37	0 17	0 24	0 26	0 3	0 2	0 6	0 16	0 7	0 9	0 24	0 18	0 12	0 10	0 13	0 10	0 10	0 10	0 0	6 0	6 0	3 0	0 11	0 0	0 0	0 0	0 0	0 0	0 0	0 0	0 0	0 0	0 0	0 0	0 0	0 0
18	16201936	TGAGATATAAT	GGAGATAGAAA	0 22	0 9	0 33	0 34	0 32	0 31	0 10	0 30	0 21	0 28	0 37	0 17	0 24	0 26	0 3	0 2	0 6	0 16	0 7	0 9	0 24	0 18	0 12	0 10	0 13	0 10	0 10	0 10	7 0	0 0	0 0	0 0	0 11	0 0	0 0	0 0	0 0	0 0	0 0	0 0	0 0	0 0	0 0	0 0	0 0	0 0
18	16201936	TGAGATATAATTAGTTGTATCAT	GGAGATATAATTAGTTGTATCAC	0 22	0 9	0 33	0 34	0 32	0 31	0 10	0 30	0 21	0 28	0 37	0 17	0 24	0 26	0 3	0 2	0 6	0 16	0 7	0 9	0 24	0 18	0 12	0 10	0 13	0 10	0 10	0 10	0 0	0 0	0 0	0 0	0 11	0 0	0 0	0 0	0 0	0 0	0 0	0 0	0 0	0 0	0 0	0 0	0 0	0 0
18	16201981	T	A	0 42	0 17	0 59	0 61	0 52	0 54	0 14	0 52	0 39	0 50	0 66	0 41	0 40	0 46	0 5	0 12	0 8	0 23	0 18	0 18	0 45	0 32	0 20	0 26	0 21	0 13	0 18	0 22	0 24	0 33	0 35	0 8	0 27	0 26	0 23	0 33	0 27	0 27	0 23	0 13	0 34	0 17	0 34	0 31	0 35	0 17
18	16201983	C	T	0 43	0 16	0 61	0 63	0 54	0 52	0 13	0 51	0 42	0 50	0 67	0 44	0 41	0 45	0 5	0 12	0 8	0 24	0 16	0 17	0 45	0 31	0 20	0 26	0 22	0 13	0 18	0 23	0 26	0 33	0 34	0 8	0 28	0 25	0 23	0 33	0 29	0 29	0 24	0 13	0 32	0 17	0 34	0 33	0 34	0 17
18	16201991	A	T	0 45	0 16	0 59	0 63	0 50	0 49	0 13	0 51	0 41	0 47	0 66	0 47	0 36	0 46	0 4	0 12	0 9	0 25	0 15	0 16	0 45	0 34	0 19	0 26	0 21	0 14	0 14	0 22	0 29	0 34	0 34	0 8	0 27	0 24	0 21	0 32	0 26	0 27	0 23	0 13	0 29	0 16	0 34	0 33	0 35	0 16
18	16202011	A	G	0 39	0 22	0 56	0 52	0 47	0 42	0 10	0 43	0 40	0 45	0 63	0 53	0 42	0 43	0 5	0 16	0 10	0 24	0 16	0 18	0 48	0 41	0 15	0 29	0 21	0 14	0 14	0 24	0 33	0 37	0 34	0 9	0 33	0 21	0 23	0 31	0 23	0 28	0 22	0 13	0 26	0 18	0 35	0 26	0 31	0 18
18	16202015	T	G	0 41	0 21	0 50	0 50	0 47	0 43	0 10	0 41	0 39	0 45	0 64	0 54	0 43	0 42	0 6	0 16	0 10	0 22	0 16	0 20	0 47	0 41	0 15	0 29	0 20	0 15	0 14	0 24	0 35	0 34	0 34	0 9	0 32	0 21	0 23	0 30	0 26	0 28	0 25	0 14	0 25	0 18	0 35	0 29	0 33	0 17
18	16202024	C	CT	0 32	0 13	0 36	0 42	0 34	0 34	0 8	0 33	0 33	0 31	0 46	0 45	0 34	0 29	0 6	0 13	0 11	0 15	0 7	0 13	0 19	0 31	0 12	0 20	0 14	0 14	0 6	0 17	0 17	0 6	0 11	0 7	0 10	0 0	0 0	0 0	0 0	0 0	0 0	0 0	0 0	0 0	0 0	0 0	0 0	0 0
18	16202027	TTTTTTT	CTTTTTTTTA	0 32	0 13	0 36	0 42	0 34	0 34	0 8	0 33	0 33	0 31	0 46	0 45	0 34	0 29	0 6	0 13	0 11	0 15	0 7	0 13	0 19	0 31	0 12	0 20	0 14	0 14	0 6	0 17	0 17	0 6	0 11	0 7	0 10	0 0	0 0	0 0	0 0	0 0	0 0	0 0	0 0	0 0	0 0	0 0	0 0	0 0
18	16202033	TA	CC	0 32	0 13	0 36	0 42	0 34	0 34	0 8	0 33	0 33	0 31	0 46	0 45	0 34	0 29	0 6	0 13	0 11	0 15	0 7	0 13	0 19	0 31	0 12	0 20	0 14	0 14	0 6	0 17	0 17	22 6	0 11	3 7	0 10	0 0	0 0	0 0	0 0	0 0	0 0	0 0	0 0	0 0	0 0	0 0	0 0	0 0
18	16202034	A	C	0 32	0 13	0 36	0 42	0 34	0 34	0 8	0 33	0 33	0 31	0 46	0 45	0 34	0 29	0 6	0 13	0 11	0 15	0 7	0 13	0 19	0 31	0 12	0 20	0 14	0 14	0 6	0 17	14 17	0 6	6 11	0 7	14 10	13 0	21 0	20 0	21 0	19 0	25 0	11 0	20 0	13 0	27 0	22 0	13 0	10 0
18	16202034	A	TC	0 32	0 13	0 36	0 42	0 34	0 34	0 8	0 33	0 33	0 31	0 46	0 45	0 34	0 29	0 6	0 13	0 11	0 15	0 7	0 13	0 19	0 31	0 12	0 20	0 14	0 14	0 6	0 17	0 17	0 6	0 11	0 7	0 10	0 0	0 0	0 0	0 0	0 0	0 0	0 0	1 0	0 0	0 0	0 0	11 0	2 0
18	16202036	T	C	0 32	0 13	0 36	0 42	0 34	0 34	0 8	0 33	0 33	0 31	0 46	0 45	0 34	0 29	0 6	0 13	0 11	0 15	0 7	0 13	16 19	0 31	0 12	0 20	0 14	0 14	0 6	0 17	0 17	0 6	0 11	0 7	0 10	0 0	0 0	0 0	0 0	0 0	0 0	0 0	0 0	0 0	0 0	0 0	0 0	0 0
18	16202046	G	T	0 40	0 20	0 49	0 47	0 44	0 39	0 14	0 39	0 40	0 43	0 53	0 57	0 48	0 46	0 7	0 18	0 13	0 19	0 15	0 18	0 48	0 40	0 17	0 25	0 16	0 13	0 7	0 20	0 41	0 37	11 19	0 10	0 31	0 17	0 22	0 24	0 26	0 21	0 29	0 13	0 22	0 17	0 25	0 24	0 26	0 18
18	16202051	T	C	0 41	0 21	0 46	1 46	0 43	0 40	0 15	0 41	1 39	0 43	0 50	0 58	0 48	0 45	0 7	0 17	0 13	0 20	0 14	0 17	0 50	0 40	0 18	0 26	0 18	0 13	0 6	0 21	0 40	0 37	0 30	0 11	16 15	8 9	9 13	21 0	25 0	11 9	7 22	9 3	0 22	0 16	0 29	0 26	0 27	0 19
18	16202079	T	C	0 43	0 23	0 47	0 49	0 40	0 45	0 16	0 40	0 37	0 45	0 52	0 52	0 44	0 41	0 5	0 15	0 14	0 14	0 13	0 16	0 56	0 46	0 18	0 22	0 14	0 14	0 6	0 15	0 35	0 38	0 39	0 12	16 16	15 0	22 0	31 0	31 0	20 0	32 0	14 0	16 0	17 0	22 0	20 0	21 0	17 0
18	16202084	T	C	0 42	0 24	0 49	0 49	0 42	0 45	0 16	0 41	0 35	0 42	0 52	0 51	0 46	0 36	0 5	0 16	0 12	0 15	0 12	0 16	0 57	0 48	0 17	0 23	0 13	0 15	0 6	0 14	0 32	0 38	0 37	0 13	0 31	0 15	0 22	0 31	0 33	0 19	0 31	0 14	0 17	0 17	0 24	0 22	0 23	0 17
18	16202088	G	T	0 39	0 25	0 48	0 50	0 42	0 46	0 18	0 42	0 34	0 42	0 52	0 52	0 50	0 36	0 5	0 14	0 11	0 15	0 12	0 18	0 58	0 45	0 19	0 24	0 13	0 13	0 6	0 13	0 33	18 20	0 37	5 8	0 30	0 18	0 22	0 30	0 33	0 19	0 29	0 15	0 18	0 17	0 22	0 21	0 22	0 17
18	16202089	T	C	0 38	0 25	0 47	0 50	0 42	0 47	0 18	0 42	0 32	0 42	0 53	0 53	0 50	0 35	0 5	0 14	0 11	0 15	0 13	0 19	0 58	0 44	0 19	0 24	0 13	0 13	0 6	0 15	0 34	0 38	0 35	0 13	0 31	0 18	0 22	0 31	0 32	0 19	0 29	0 15	0 16	0 17	0 25	0 22	0 24	0 17
18	16202102	G	T	0 41	0 27	0 52	0 57	0 41	0 46	0 16	0 51	0 29	0 43	0 51	0 49	0 47	0 36	0 5	0 12	0 12	0 14	0 15	0 17	0 56	0 42	0 20	0 24	0 13	0 12	0 6	0 11	0 31	0 30	0 35	0 13	0 31	0 19	0 23	0 24	0 31	0 15	0 26	0 13	0 15	0 17	0 26	0 20	0 22	0 17
18	16202110	A	G	0 40	0 25	0 53	30 27	0 42	0 46	0 15	0 49	0 26	0 46	0 49	0 45	0 45	0 33	0 6	0 11	0 12	0 12	0 16	0 15	0 56	0 43	0 19	0 25	0 12	0 11	0 7	0 10	0 32	0 31	0 33	0 14	0 31	0 21	0 20	0 24	0 34	0 16	0 25	0 14	0 17	0 19	0 31	0 23	0 22	0 20
18	16202119	AACTTTGCCAGCTAAATTG	A	0 30	0 18	0 42	0 44	0 34	0 39	0 10	0 47	0 20	0 32	0 45	0 27	0 30	0 24	0 6	0 6	0 8	0 11	0 9	0 12	0 44	0 39	0 15	0 19	0 10	0 8	0 8	0 5	0 25	0 18	0 19	0 13	0 25	0 18	0 14	0 0	0 15	0 15	0 21	0 12	0 14	0 19	0 26	0 18	4 11	0 18
18	16202120	A	G	0 30	0 18	0 42	0 44	0 34	0 39	0 10	0 47	0 20	0 32	0 45	0 27	0 30	0 24	0 6	0 6	0 8	0 11	0 9	0 12	0 44	0 39	0 15	0 19	0 10	0 8	0 8	0 5	0 25	0 18	0 19	0 13	0 25	0 18	0 14	0 0	0 15	0 15	0 21	0 12	0 14	0 19	0 26	0 18	0 11	0 18
18	16202120	ACTTTGCC	GCTTTGCT	0 30	0 18	0 42	0 44	0 34	0 39	0 10	0 47	0 20	0 32	0 45	0 27	0 30	0 24	0 6	0 6	0 8	0 11	0 9	0 12	0 44	0 39	0 15	0 19	0 10	0 8	0 8	0 5	0 25	0 18	0 19	0 13	0 25	0 18	0 14	0 0	0 15	0 15	0 21	0 12	0 14	0 19	0 26	0 18	0 11	0 18
18	16202133	A	C	0 30	0 18	0 42	0 44	0 34	0 39	0 10	0 47	0 20	0 32	0 45	0 27	0 30	0 24	0 6	0 6	0 8	0 11	0 9	0 12	0 44	0 39	0 15	0 19	0 10	0 8	0 8	0 5	0 25	0 18	0 19	0 13	0 25	0 18	0 14	20 0	20 15	0 15	0 21	0 12	0 14	0 19	0 26	0 18	0 11	0 18
18	16202134	A	G	0 30	0 18	0 42	0 44	0 34	0 39	0 10	0 47	0 20	0 32	0 45	0 27	0 30	0 24	0 6	0 6	0 8	0 11	0 9	0 12	0 44	0 39	0 15	0 19	0 10	0 8	0 8	0 5	0 25	0 18	0 19	0 13	0 25	0 18	0 14	0 0	0 15	0 15	0 21	0 12	0 14	0 19	0 26	0 18	0 11	0 18
18	16202140	T	C	0 36	0 24	0 54	0 60	0 44	0 45	0 11	0 59	0 31	0 43	0 55	0 41	0 43	0 30	0 6	0 9	0 9	0 16	0 13	0 13	0 50	0 46	0 18	0 26	0 9	0 11	0 9	0 12	0 29	0 23	0 27	0 13	0 29	9 11	10 10	27 0	21 18	0 19	10 20	10 4	0 18	0 19	0 34	0 18	0 20	0 23
18	16202160	CCCA	ACCT	0 31	0 23	0 55	0 63	0 39	0 43	0 6	0 57	0 33	0 41	0 56	0 42	0 40	0 27	0 6	0 11	0 11	0 17	0 15	0 14	0 46	0 39	0 18	0 20	0 5	0 12	0 8	0 11	0 8	0 7	0 13	0 7	0 14	0 0	0 0	0 0	0 0	0 0	0 0	0 0	0 0	0 0	0 1	0 0	0 0	0 0
18	16202163	A	T	0 31	0 23	0 55	0 63	0 39	0 43	0 6	0 57	0 33	0 41	0 56	0 42	0 40	0 27	0 6	0 11	0 11	0 17	0 15	0 14	0 46	0 39	0 18	0 20	0 5	0 12	0 8	0 11	17 8	13 7	11 13	4 7	14 14	22 0	14 0	25 0	43 0	16 0	34 0	13 0	17 0	18 0	28 1	16 0	22 0	22 0
18	16202164	A	G	0 33	0 23	0 54	1 64	0 42	0 44	0 7	0 57	0 33	0 42	0 59	0 45	0 41	0 28	0 7	0 12	0 12	0 17	0 15	0 15	0 48	0 41	0 18	0 20	0 6	0 11	0 8	0 11	0 27	0 22	0 25	0 12	0 27	0 22	0 15	0 25	0 43	0 17	0 33	0 13	0 17	0 19	0 29	0 16	0 23	0 23
18	16202185	C	A	0 30	0 23	0 55	0 63	0 44	0 37	0 7	0 49	0 36	0 44	0 60	0 39	0 41	0 31	0 8	0 12	0 12	0 18	0 18	0 12	0 43	0 32	0 17	0 26	0 6	0 10	0 8	0 15	0 25	0 25	0 29	0 12	0 26	0 22	0 15	0 31	0 41	0 16	0 34	0 13	0 25	0 21	0 30	0 19	0 25	0 23
18	16202186	AG	A	0 28	0 19	0 49	0 51	0 39	0 34	0 6	0 38	0 32	0 39	0 53	0 34	0 36	0 25	0 8	0 11	0 9	0 17	0 15	0 8	0 39	0 28	0 17	0 22	0 4	0 10	0 7	0 14	0 23	0 24	15 12	0 11	0 23	0 17	0 12	0 23	0 39	0 17	0 31	0 13	0 24	0 18	0 27	0 16	0 26	0 21
18	16202199	G	A	0 28	0 20	0 50	0 53	0 46	0 35	0 8	0 19	0 18	0 39	0 58	0 48	0 37	0 29	0 6	0 13	0 9	0 18	0 17	0 12	0 42	0 32	0 19	0 27	0 6	0 4	0 8	0 14	0 23	0 31	0 27	0 11	0 18	0 22	0 13	0 30	0 38	0 18	0 33	0 13	0 27	0 19	0 27	0 16	0 28	0 24
18	16202199	GAAAC	AAAAA	0 28	0 20	0 50	0 53	0 46	0 35	0 8	0 19	0 18	0 39	0 58	0 48	0 37	0 29	0 6	0 13	0 9	0 18	0 17	0 12	0 42	0 32	0 19	0 27	0 6	0 4	0 8	0 14	0 23	0 31	0 27	0 11	0 18	0 22	0 13	0 30	0 38	0 18	0 33	0 13	0 27	0 19	0 27	0 16	0 28	0 24
18	16202199	G	C	0 28	0 20	0 50	0 53	0 46	0 35	0 8	23 19	17 18	0 39	0 58	0 48	0 37	0 29	0 6	0 13	0 9	0 18	0 17	0 12	1 42	0 32	0 19	0 27	0 6	8 4	0 8	0 14	0 23	0 31	0 27	0 11	0 18	0 22	0 13	0 30	0 38	0 18	0 33	0 13	0 27	0 19	0 27	0 16	0 28	0 24
18	16202206	C	T	0 28	0 23	0 53	0 56	0 49	0 37	0 8	0 45	0 36	0 37	0 62	0 49	0 38	0 30	0 4	0 15	0 9	0 22	0 18	0 10	0 42	0 30	0 18	0 26	0 6	0 14	0 7	0 14	0 26	0 31	0 28	0 12	0 20	0 22	0 13	0 30	0 39	0 23	0 35	0 13	0 26	0 20	0 25	0 15	0 26	0 25
18	16202222	TACTT	AACTA	0 21	0 20	0 40	0 41	0 38	0 30	0 9	0 36	0 27	0 29	0 43	0 37	0 30	0 22	0 3	0 15	0 9	0 20	0 17	0 7	0 35	0 21	0 13	0 24	0 7	0 12	0 6	0 13	0 22	0 24	0 26	0 11	7 10	0 15	0 3	0 0	0 0	0 6	0 12	0 4	0 26	0 16	0 27	0 13	0 23	0 23
18	16202226	T	A	0 21	0 20	0 40	0 41	0 38	0 30	0 9	0 36	0 27	0 29	0 43	0 37	0 30	0 22	0 3	0 15	0 9	0 20	0 17	0 7	0 35	0 21	0 13	0 24	0 7	0 12	0 6	0 13	0 22	0 24	0 26	0 11	0 10	6 15	11 3	23 0	28 0	12 6	16 12	5 4	0 26	0 16	0 27	0 13	0 23	0 23
18	16202236	C	A	0 26	0 23	0 45	0 53	0 43	0 42	0 12	0 42	0 31	0 31	0 57	0 45	0 30	0 29	0 5	0 15	0 13	0 21	0 19	0 9	0 46	0 33	0 13	0 27	0 12	0 17	0 7	0 14	0 29	0 34	0 33	0 10	0 23	0 23	0 20	0 28	0 34	0 24	0 34	0 10	0 28	0 19	0 27	0 19	0 24	0 28
18	16202240	A	C	0 26	0 22	0 44	0 54	0 44	0 41	0 11	0 38	0 30	0 31	0 61	0 48	0 29	0 30	0 5	0 17	0 14	0 22	0 18	0 8	0 49	0 31	0 13	0 27	0 12	0 16	0 7	0 12	0 27	0 37	0 34	0 10	0 22	0 22	0 20	0 28	0 35	0 24	0 38	0 9	0 28	0 20	0 30	0 19	0 23	0 28
18	16202254	A	T	0 24	0 18	0 43	0 54	1 47	0 47	0 12	0 37	0 28	0 32	0 65	0 47	0 26	0 33	0 5	0 16	0 14	0 20	0 17	0 8	0 44	0 33	0 12	0 28	0 15	0 15	0 7	0 13	0 25	0 34	0 36	0 11	0 22	0 21	0 17	0 27	0 37	0 23	0 37	0 11	0 25	0 17	0 24	0 21	0 24	0 26
18	16202260	A	G	0 23	0 20	0 42	0 58	0 49	0 48	0 13	0 38	0 28	0 36	0 64	0 49	0 24	0 32	0 6	0 15	0 14	0 19	0 16	0 6	0 44	0 34	0 10	0 27	0 15	0 16	0 7	0 12	0 23	0 33	0 34	0 10	0 22	0 20	0 17	0 24	0 34	0 23	0 35	0 11	0 22	0 16	0 20	0 19	0 24	0 23
18	16202285	G	A	0 19	0 21	0 44	0 56	0 40	0 46	0 13	0 42	0 25	0 37	0 58	0 55	0 19	0 31	0 6	0 19	0 15	0 19	0 14	0 7	0 45	0 38	0 9	0 24	0 17	0 18	0 6	0 8	0 26	0 29	0 36	0 12	0 20	0 21	0 14	0 19	0 32	0 21	0 29	0 14	0 24	0 15	0 17	0 18	0 28	0 21
18	16202306	A	G	0 19	0 17	0 52	0 55	0 38	0 43	0 14	0 46	0 24	0 40	0 53	0 51	0 23	0 32	0 7	0 20	0 15	0 18	0 13	0 7	0 45	0 41	0 9	0 23	0 20	0 15	0 7	0 9	0 27	0 29	0 37	0 14	13 7	8 13	9 5	20 0	30 0	11 11	14 7	7 6	0 25	0 15	0 18	0 20	0 28	0 21
18	16202311	C	G	0 19	0 13	0 52	0 56	0 37	0 42	0 13	0 45	0 23	0 45	0 52	0 50	0 23	0 31	0 7	0 19	0 15	0 18	0 13	0 7	0 46	0 44	0 9	0 21	0 18	0 15	0 7	0 11	1 25	0 28	0 37	0 13	0 20	0 20	0 12	0 19	0 27	0 22	0 20	0 12	0 26	0 14	0 18	0 20	0 25	0 20
18	16202316	C	A	0 21	0 14	0 50	0 58	0 37	0 40	0 13	0 44	0 22	0 46	0 53	0 51	0 25	0 31	0 5	0 18	0 16	0 19	0 14	0 8	0 46	0 45	0 10	0 26	0 16	0 15	0 7	0 11	1 28	0 26	0 35	0 13	0 22	12 8	6 7	0 19	0 28	11 12	7 13	7 5	28 0	16 0	18 0	21 0	11 12	19 0
18	16202320	TA	T	0 18	0 12	0 52	0 57	0 37	0 39	0 12	0 43	0 21	0 46	0 50	0 53	0 26	0 31	0 5	0 18	0 16	0 19	0 15	0 8	0 46	0 45	0 10	0 26	0 15	0 15	0 8	0 10	0 28	0 28	0 36	0 13	0 22	0 20	0 12	0 19	0 29	0 23	0 20	0 11	0 26	0 15	0 18	0 20	0 21	0 20
18	16202322	G	T	0 18	0 12	0 52	0 57	0 37	0 39	0 12	0 43	0 21	0 46	0 50	0 53	0 26	0 31	0 5	0 18	0 16	0 19	0 15	0 8	0 46	0 45	0 10	0 26	0 15	0 15	0 8	0 10	1 28	0 28	0 36	0 13	0 22	0 20	0 12	0 19	0 29	0 23	0 20	0 11	0 26	0 15	0 18	0 20	0 21	0 20
18	16202327	A	C	0 18	0 13	0 58	0 59	0 37	0 38	0 12	0 45	0 23	0 45	0 51	0 52	0 26	0 33	0 4	0 19	0 15	0 18	0 15	0 8	0 49	0 46	0 12	0 27	0 17	0 13	0 8	0 10	0 28	0 27	0 34	0 12	0 20	0 21	0 12	0 18	0 28	0 23	0 19	0 11	0 24	0 18	0 17	0 21	0 17	0 20
18	16202330	AC	A	0 17	0 12	0 58	0 51	0 37	0 36	0 11	0 46	0 23	0 44	0 46	0 50	0 30	0 30	0 4	0 16	0 14	0 18	0 13	0 9	0 45	0 40	0 11	0 24	0 14	0 12	0 7	0 10	0 28	0 26	0 28	0 11	0 19	0 20	0 10	0 16	0 29	0 24	0 19	0 10	0 23	0 16	0 17	0 22	0 17	0 18
18	16202337	A	T	0 17	0 12	0 58	0 51	0 37	0 36	0 11	0 46	0 23	0 44	0 46	0 50	0 30	0 30	0 4	0 16	0 14	0 18	0 13	0 9	0 45	0 40	0 11	0 24	0 14	0 12	0 7	0 10	0 28	0 26	0 28	0 11	0 19	0 20	0 10	0 16	0 29	0 24	0 19	0 10	0 23	0 16	0 17	0 22	0 17	0 18
18	16202369	A	T	0 21	0 17	0 57	0 58	0 41	0 32	0 10	0 47	0 30	0 42	0 48	0 59	0 49	0 29	0 5	0 21	0 9	0 19	0 15	0 10	0 53	0 45	0 13	0 24	0 17	0 11	0 6	0 11	0 31	0 30	0 28	0 10	0 16	0 16	0 14	0 9	0 29	0 27	0 20	0 12	0 21	0 16	0 18	0 25	0 20	0 15
18	16202373	A	G	0 21	0 18	0 54	0 56	0 42	0 33	0 9	0 48	0 31	0 43	0 51	0 58	0 47	0 30	0 5	0 20	0 9	0 19	0 15	0 12	1 50	0 42	0 11	0 22	0 16	0 12	0 6	0 10	0 30	0 31	0 27	0 12	8 7	0 19	0 11	0 7	0 28	0 27	0 17	0 12	0 20	0 15	0 21	0 25	0 20	0 14
18	16202376	G	C	0 22	0 17	0 55	0 58	0 42	0 35	0 8	0 47	0 30	0 43	0 50	0 59	0 48	0 33	0 5	0 19	0 8	0 20	0 14	0 12	0 55	0 39	0 11	0 21	0 15	0 10	0 7	0 9	0 28	0 32	0 27	0 12	0 15	0 18	0 13	4 2	0 27	0 27	0 18	0 12	0 19	0 15	0 21	0 24	0 20	0 15
18	16202378	G	C	0 22	0 16	0 55	0 58	0 43	0 34	0 8	0 46	0 29	0 43	0 49	0 59	0 49	0 34	0 5	0 19	0 8	0 20	0 13	0 12	0 55	0 40	0 11	0 21	0 16	0 10	0 7	0 8	0 28	0 31	0 26	0 12	0 14	0 19	0 12	0 8	0 27	0 26	0 17	0 12	0 19	0 15	0 21	0 24	0 23	0 15
18	16202390	CA	TG	0 18	0 16	0 54	0 56	0 41	0 32	0 5	0 42	0 24	0 41	0 45	0 55	0 54	0 30	0 6	0 15	0 5	0 19	0 13	0 10	0 56	0 35	0 10	0 23	0 14	0 8	0 8	0 8	0 0	0 0	0 0	0 0	0 7	0 0	0 0	0 0	0 0	0 0	0 0	0 0	0 0	0 0	0 0	0 0	0 0	0 0
18	16202391	A	G	0 18	0 16	0 54	0 56	0 41	0 32	0 5	0 42	0 24	0 41	0 45	0 55	0 54	0 30	0 6	0 15	0 5	0 19	0 13	0 10	0 56	0 35	0 10	0 23	0 14	0 8	0 8	0 8	28 0	34 0	21 0	11 0	8 7	17 0	12 0	11 0	26 0	22 0	16 0	12 0	24 0	16 0	23 0	21 0	23 0	13 0
18	16202398	G	A	0 17	0 14	0 48	0 51	0 42	0 33	0 5	0 43	0 25	0 41	0 45	0 55	0 53	0 31	0 8	0 12	0 6	0 19	0 15	0 11	0 56	0 33	0 12	0 20	0 12	0 8	0 7	0 8	30 0	37 0	21 0	11 0	7 8	16 0	13 0	13 0	26 0	22 0	15 0	11 0	24 0	17 0	26 0	23 0	24 0	13 0
18	16202409	A	T	0 16	0 18	0 45	0 54	0 44	0 36	0 7	0 41	0 27	0 35	0 46	0 51	0 51	0 34	0 9	0 10	0 4	0 25	0 13	0 10	0 57	0 33	0 11	0 20	0 10	0 9	0 6	0 11	0 33	0 37	0 21	0 11	0 14	9 7	3 11	13 0	12 14	0 23	8 7	5 6	0 24	0 17	0 25	0 22	0 24	0 13
18	16202411	T	C	0 16	0 18	0 47	0 55	0 41	0 36	0 7	0 41	0 27	0 33	0 47	0 51	0 51	0 33	0 9	0 10	0 4	0 24	0 12	0 8	0 56	0 35	0 11	0 20	0 11	0 10	0 6	0 10	18 14	14 20	10 10	4 7	0 14	0 17	0 15	0 14	0 27	0 21	0 14	0 12	0 25	0 17	0 26	0 18	0 24	0 12
18	16202416	GA	G	0 10	0 12	0 31	0 33	0 33	0 31	0 4	0 27	0 17	0 27	0 31	0 37	0 31	0 23	0 7	0 5	0 3	0 21	0 11	0 4	0 37	0 22	0 9	0 11	0 9	0 8	0 3	0 7	0 10	0 19	0 7	0 7	0 10	0 12	0 14	0 13	0 21	0 22	0 12	0 9	0 16	0 13	0 21	0 17	0 16	0 9
18	16202420	A	G	0 10	0 12	0 31	0 33	0 33	0 31	0 4	0 27	0 17	0 27	0 31	0 37	0 31	0 23	0 7	0 5	0 3	0 21	0 11	0 4	0 37	0 22	0 9	0 11	0 9	0 8	0 3	0 7	15 10	13 19	8 7	4 7	0 10	0 12	0 14	0 13	0 21	0 22	0 12	0 9	0 16	0 13	0 21	0 17	0 16	0 9
18	16202420	AAAAAGAAGCAAAAGA	GAAAAGAAGCAAAAG	0 10	0 12	0 31	0 33	0 33	0 31	0 4	0 27	0 17	0 27	0 31	0 37	0 31	0 23	0 7	0 5	0 3	0 21	0 11	0 4	0 37	0 22	0 9	0 11	0 9	0 8	0 3	0 7	0 10	0 19	0 7	0 7	0 10	0 12	0 14	0 13	0 21	0 22	0 12	0 9	0 16	0 13	0 21	0 17	0 16	0 9
18	16202445	T	C	0 18	0 18	0 53	0 44	0 43	0 42	0 6	0 39	0 27	0 41	0 42	0 52	0 41	0 34	0 12	0 13	0 4	0 22	0 16	0 5	0 42	0 32	0 12	0 20	0 11	0 15	0 6	0 13	0 32	0 41	0 27	0 11	0 24	6 8	5 13	15 0	14 11	0 23	7 9	4 5	0 21	0 18	0 22	0 18	0 17	0 10
18	16202451	A	T	0 18	0 17	0 52	0 48	0 44	0 42	0 7	0 40	0 30	0 40	0 39	0 53	0 41	0 35	0 11	0 12	0 5	0 24	0 17	0 6	0 41	0 33	0 13	0 22	0 11	0 17	0 7	0 16	0 32	0 44	0 27	0 12	0 22	0 14	0 18	0 14	0 23	0 22	0 16	0 10	0 24	0 17	0 22	0 20	0 17	0 11
18	16202457	C	G	0 17	0 18	0 56	0 47	0 45	0 45	0 6	0 43	0 29	0 41	0 41	0 53	0 40	0 37	0 12	0 13	0 7	0 22	0 17	0 7	0 40	0 32	0 13	0 23	0 11	0 17	0 8	0 15	0 32	0 43	0 26	0 13	0 22	0 13	0 19	0 14	0 24	0 23	0 16	0 10	0 24	0 14	0 21	0 19	0 19	0 11
18	16202469	A	G	0 17	0 17	0 60	0 45	0 47	0 49	0 10	0 44	0 31	0 41	0 46	0 49	0 43	0 38	0 12	0 16	0 11	0 23	0 17	0 8	0 41	0 33	0 14	0 27	0 12	0 19	0 9	0 21	0 37	0 38	0 32	0 12	0 26	0 16	0 19	0 13	0 22	0 22	0 16	0 10	0 22	0 15	0 20	0 20	0 20	0 14
18	16202469	A	T	0 17	0 17	0 60	0 45	0 47	0 49	0 10	0 44	0 31	0 41	0 46	0 49	0 43	0 38	0 12	0 16	0 11	0 23	0 17	0 8	0 41	0 33	0 14	0 27	0 12	0 19	0 9	0 21	0 37	0 38	0 32	0 12	0 26	0 16	0 19	0 13	0 22	0 22	0 16	0 10	0 22	0 15	0 20	0 20	0 20	0 14
18	16202483	T	G	0 17	0 19	0 58	0 43	0 44	29 19	0 10	0 41	0 33	0 38	0 45	0 45	0 41	0 32	0 11	0 14	0 12	0 22	0 17	0 8	22 19	0 35	0 17	0 26	0 11	0 19	3 5	12 10	0 37	0 35	0 30	0 14	0 29	0 17	0 20	0 13	0 25	0 22	0 17	0 10	0 24	0 13	0 21	0 17	0 23	0 16
18	16202501	A	G	0 17	0 23	0 57	0 42	0 41	0 49	0 11	0 39	0 30	0 34	0 47	0 41	0 40	0 34	0 9	0 18	0 13	0 22	0 15	0 8	0 38	0 38	0 14	0 23	0 12	0 18	0 8	0 20	0 29	0 36	0 30	0 13	0 26	0 15	0 19	0 18	0 24	0 20	0 19	0 11	0 25	0 13	0 17	0 19	0 21	0 17
18	16202502	TT	AG	0 17	0 23	0 57	0 41	0 40	0 48	0 11	0 38	0 29	0 35	0 46	0 39	0 40	0 33	0 10	0 18	0 13	0 21	0 15	0 7	0 37	0 37	0 13	0 23	0 11	0 18	0 8	0 20	0 27	0 36	0 29	0 13	0 26	0 16	0 19	0 17	0 25	0 21	0 19	0 11	0 25	0 13	0 17	0 19	0 20	0 17
18	16202505	AT	A	0 16	0 20	0 51	0 38	0 38	0 44	0 10	0 38	0 24	0 35	0 45	0 37	0 35	0 31	0 9	0 18	0 13	0 17	0 14	0 8	0 36	0 35	0 14	0 22	0 11	0 16	0 7	0 18	0 28	0 23	0 26	0 12	0 25	0 16	0 20	0 16	0 26	0 19	0 16	0 10	0 24	0 13	0 18	0 18	0 20	0 17
18	16202511	A	G	0 18	0 24	0 53	0 40	0 40	0 47	0 11	0 40	1 25	0 36	0 46	0 39	0 36	0 36	0 9	0 19	0 14	0 20	0 14	0 8	0 39	0 34	0 15	0 23	0 11	0 17	0 7	0 17	0 31	0 23	0 30	0 12	0 24	0 16	0 20	0 16	0 26	0 19	0 20	0 14	0 25	0 15	0 18	0 18	0 20	0 17
18	16202513	A	G	0 18	0 25	0 51	0 40	0 42	0 47	0 11	0 40	0 26	0 37	0 45	0 39	0 36	0 35	0 9	0 19	0 14	0 19	0 15	0 9	0 40	0 31	0 16	0 22	0 10	0 17	0 7	0 19	0 32	0 24	0 29	0 12	0 24	9 7	7 13	17 0	12 14	0 19	9 12	9 5	0 26	0 15	0 18	0 17	0 21	0 18
18	16202522	C	G	0 14	0 24	0 48	0 39	16 24	0 38	4 8	22 14	9 17	0 35	0 44	0 40	0 35	7 22	0 7	0 16	0 13	0 19	9 5	6 3	0 35	14 19	0 15	0 20	0 7	11 4	1 5	0 17	33 0	26 0	29 0	12 0	11 12	14 0	17 0	18 0	25 0	16 0	22 0	14 0	27 0	14 0	15 0	15 0	16 0	18 0
18	16202522	CCC	GCT	0 14	0 24	0 48	0 39	0 24	0 38	0 8	0 14	0 17	0 35	0 44	0 40	0 35	0 22	0 7	0 16	0 13	0 19	0 5	0 3	0 35	0 19	0 15	0 20	0 7	0 4	0 5	0 17	0 0	0 0	0 0	0 0	0 12	0 0	0 0	0 0	0 0	0 0	0 0	0 0	0 0	0 0	0 0	0 0	0 0	0 0
18	16202527	G	T	0 14	0 24	0 51	0 39	0 43	0 41	0 12	0 38	0 27	0 37	0 48	0 40	0 35	0 29	0 7	0 16	0 13	0 19	0 16	0 12	0 36	0 35	0 14	0 20	0 6	0 13	0 4	0 17	16 17	14 12	13 16	6 6	11 11	14 0	17 0	15 0	26 0	18 0	24 0	14 0	29 0	16 0	16 0	14 0	18 0	19 0
18	16202542	A	G	0 14	0 24	0 48	0 36	0 41	0 41	0 11	0 39	0 25	0 36	0 44	0 36	0 30	0 24	0 6	0 15	0 15	0 19	0 16	0 11	0 40	1 31	0 12	0 19	0 6	0 12	0 3	0 14	0 33	0 26	0 30	0 14	0 19	0 13	0 13	0 14	0 21	0 19	0 20	0 13	0 30	0 16	0 12	0 12	0 16	0 21
18	16202542	A	T	0 14	0 24	0 48	0 36	0 41	0 41	0 11	0 39	0 25	0 36	0 44	0 36	0 30	0 24	0 6	0 15	0 15	0 19	0 16	0 11	0 40	0 31	0 12	0 19	0 6	0 12	0 3	0 14	0 33	0 26	0 30	0 14	0 19	0 13	0 13	0 14	0 21	0 19	0 20	0 13	0 30	0 16	0 12	0 12	0 16	0 21
18	16202557	C	A	0 12	0 26	0 45	0 33	0 39	0 36	0 13	0 32	0 22	0 38	0 47	0 36	0 32	0 27	0 5	0 15	0 11	0 18	0 19	0 10	0 47	0 35	0 13	0 22	0 7	0 10	0 2	0 6	0 31	0 29	0 33	0 14	0 22	0 14	0 13	0 15	0 21	0 19	0 23	0 14	0 34	0 17	0 11	0 14	0 13	0 24
18	16202569	TAATTTTTTTTTCTA	ATTTTTTTTTTCTG	0 11	0 21	0 37	0 26	0 16	0 27	0 5	0 11	0 12	0 36	0 37	0 35	0 26	0 13	0 5	0 13	0 11	0 13	0 1	0 1	0 35	0 19	0 9	0 15	0 6	0 3	0 1	0 6	0 0	0 0	0 10	0 0	0 7	0 0	0 0	0 0	0 0	0 0	0 0	0 0	0 2	0 0	0 1	0 0	0 0	0 0
18	16202571	A	AT	0 11	0 21	0 37	0 26	15 16	0 27	4 5	12 11	6 12	0 36	0 37	0 35	0 26	14 13	0 5	0 13	0 11	0 13	7 1	8 1	0 35	18 19	0 9	0 15	0 6	6 3	1 1	0 6	24 0	19 0	18 10	13 0	0 7	4 0	9 0	0 0	0 0	12 0	8 0	6 0	23 2	18 0	11 1	13 0	15 0	8 0
18	16202571	A	ATT	0 11	0 21	0 37	0 26	0 16	0 27	0 5	0 11	0 12	0 36	0 37	0 35	0 26	0 13	0 5	0 13	0 11	0 13	0 1	0 1	0 35	0 19	0 9	0 15	0 6	0 3	0 1	0 6	0 0	1 0	0 10	0 0	0 7	1 0	0 0	0 0	0 0	0 0	0 0	0 0	1 2	0 0	0 1	0 0	1 0	16 0
18	16202571	A	ATTT	0 11	0 21	0 37	0 26	0 16	0 27	0 5	0 11	0 12	0 36	0 37	0 35	0 26	0 13	0 5	0 13	0 11	0 13	0 1	0 1	0 35	0 19	0 9	0 15	0 6	0 3	0 1	0 6	0 0	0 0	0 10	0 0	0 7	0 0	0 0	0 0	0 0	0 0	0 0	0 0	0 2	0 0	0 1	0 0	0 0	0 0
18	16202580	T	TTC	0 11	0 21	0 37	0 26	0 16	0 27	0 5	0 11	0 12	0 36	0 37	0 35	0 26	0 13	0 5	0 13	0 11	0 13	0 1	0 1	0 35	0 19	0 9	0 15	0 6	0 3	0 1	0 6	0 0	0 0	0 10	0 0	0 7	3 0	3 0	11 0	5 0	0 0	11 0	7 0	0 2	0 0	0 1	0 0	0 0	0 0
18	16202581	CTA	TCCTG	0 11	0 21	0 37	0 26	0 16	0 27	0 5	0 11	0 12	0 36	0 37	0 35	0 26	0 13	0 5	0 13	0 11	0 13	0 1	0 1	0 35	0 19	0 9	0 15	0 6	0 3	0 1	0 6	0 0	0 0	0 10	0 0	5 7	0 0	0 0	0 0	9 0	7 0	0 0	0 0	0 2	0 0	0 1	0 0	0 0	0 0
18	16202587	G	GA	0 11	0 21	0 44	0 34	0 42	0 31	0 9	0 28	0 19	0 40	0 43	0 48	0 28	0 27	0 6	0 13	0 14	0 15	0 21	0 11	0 36	0 43	0 8	0 17	0 9	0 14	0 2	0 9	0 26	17 12	0 35	0 10	0 15	0 15	0 10	0 15	0 19	0 22	0 28	0 17	0 31	0 19	0 16	0 15	0 20	0 26
18	16202600	A	G	0 15	0 24	0 45	0 40	0 46	0 36	0 11	0 33	0 26	0 45	0 46	0 59	0 30	0 30	0 7	0 13	0 15	0 15	0 20	0 12	0 36	0 50	0 9	0 19	0 9	0 16	0 2	0 13	0 30	0 36	0 38	0 12	0 17	0 17	0 13	0 19	0 20	0 24	0 30	0 20	0 34	0 19	0 17	0 17	0 20	0 27
18	16202602	A	T	0 16	0 24	0 47	0 39	0 48	0 38	0 11	0 33	0 25	0 47	0 45	0 61	0 32	0 31	0 6	0 13	0 16	0 15	0 19	0 12	0 39	0 53	0 9	0 19	0 9	0 17	0 2	0 14	0 29	21 15	0 37	4 7	0 17	0 16	0 13	0 19	0 19	0 23	0 30	0 20	0 34	0 19	0 18	0 18	0 22	0 27
18	16202603	G	T	0 17	0 24	0 47	0 39	0 47	0 38	0 11	0 33	0 26	0 48	0 45	0 60	0 31	0 31	0 6	0 13	0 16	0 15	0 20	0 12	0 39	0 52	0 9	0 19	0 8	0 18	0 2	0 14	0 30	0 36	0 38	0 11	0 17	0 17	0 10	0 20	0 19	0 22	0 29	0 19	0 31	0 20	0 17	0 16	0 19	0 24
18	16202604	A	G	0 16	0 24	0 48	0 39	0 47	0 39	0 10	0 32	0 25	0 48	0 45	0 61	0 31	0 31	0 5	0 13	0 16	0 15	0 20	0 11	0 38	0 54	0 9	0 18	0 8	0 18	0 2	0 14	0 31	0 38	1 37	0 13	0 17	0 18	0 12	0 19	0 19	0 23	0 30	0 20	0 33	0 19	0 17	0 17	0 20	0 27
18	16202614	T	A	0 15	0 22	0 46	0 37	0 52	0 37	0 10	0 35	0 22	0 53	0 43	0 61	0 31	0 30	0 6	0 15	0 14	0 15	0 19	0 10	0 39	0 53	0 7	0 20	0 10	0 15	0 4	0 12	0 29	0 40	0 38	0 13	0 17	0 17	0 12	0 21	0 19	0 23	0 27	0 19	0 34	0 19	0 17	0 20	0 20	0 25
18	16202633	G	A	0 16	0 20	0 45	0 37	0 49	0 35	0 9	0 39	0 25	0 57	0 43	0 67	0 32	0 34	0 6	0 14	0 16	0 18	0 16	0 7	0 43	0 53	0 9	0 19	0 14	0 17	0 5	0 13	0 34	0 37	0 33	0 13	0 17	0 13	0 13	0 24	0 24	0 26	0 34	0 21	0 32	0 21	0 14	0 23	0 22	0 26
18	16202641	A	G	0 17	0 19	0 46	0 36	0 47	0 36	0 9	0 40	0 22	0 58	0 42	0 62	0 35	0 33	0 8	0 15	0 12	0 17	0 16	0 6	0 44	0 55	0 10	0 19	0 15	0 16	0 5	0 16	0 32	0 38	0 28	0 13	1 19	0 14	0 13	0 24	0 26	0 28	0 33	0 22	0 34	0 21	0 14	0 24	0 22	0 23
18	16202647	T	A	0 19	0 17	0 45	0 37	0 49	0 34	0 8	0 43	0 22	0 57	0 39	0 62	0 34	0 33	0 8	0 13	0 13	0 21	0 13	0 6	0 47	0 52	0 11	0 16	0 15	0 15	0 6	0 19	1 31	0 39	1 27	0 14	0 21	0 14	0 9	0 23	0 27	0 26	0 34	0 22	0 32	0 22	0 15	0 22	0 23	0 24
18	16202647	T	C	0 19	0 17	0 45	0 37	0 49	0 34	0 8	0 43	0 22	0 57	0 39	0 62	0 34	0 33	0 8	0 13	0 13	0 21	0 13	0 6	0 47	0 52	0 11	0 16	0 15	0 15	0 6	0 19	0 31	0 39	0 27	0 14	0 21	0 14	0 9	0 23	0 27	0 26	0 34	0 22	0 32	0 22	0 15	0 22	0 23	0 24
18	16202649	G	C	0 18	0 16	0 45	0 38	0 51	0 32	0 8	0 44	0 23	0 58	0 41	0 61	0 34	0 31	0 8	0 13	0 13	0 22	0 13	0 6	0 46	0 51	0 10	0 16	0 14	0 15	0 6	0 19	0 33	0 39	0 27	0 14	0 20	0 13	0 9	0 22	0 27	0 23	0 34	0 21	0 32	0 24	0 14	0 20	0 22	0 23
18	16202674	A	G	0 20	0 15	0 46	0 41	0 52	0 46	0 8	0 51	0 28	0 52	0 46	0 52	0 40	0 29	0 6	0 12	0 12	0 23	0 18	0 10	0 52	0 51	0 12	0 19	0 11	0 13	0 7	0 22	0 33	0 31	0 21	0 14	0 24	0 16	0 15	0 26	0 28	0 29	0 29	0 23	0 28	0 23	0 16	0 20	0 27	0 26
18	16202675	T	A	0 20	0 17	0 46	0 42	0 53	0 46	0 9	0 54	0 30	0 53	0 45	0 51	0 40	0 30	0 6	0 13	0 11	0 23	0 20	0 11	0 51	0 52	0 13	0 19	0 11	0 13	0 7	0 22	0 34	0 32	0 21	0 14	0 25	0 17	0 14	0 26	0 27	0 28	0 29	0 23	0 30	0 22	0 15	0 20	0 27	0 24
18	16202677	T	A	0 21	0 17	0 47	0 41	0 50	0 47	0 9	0 54	0 31	0 52	0 44	0 49	0 41	0 29	0 5	0 13	0 11	0 23	0 19	0 12	0 54	0 51	0 13	0 19	0 12	0 13	0 7	0 22	0 32	0 30	0 20	0 14	0 24	0 16	0 15	0 27	0 28	0 27	0 29	0 24	0 30	0 22	0 16	0 21	0 25	0 24
18	16202691	C	T	0 18	0 19	0 50	0 43	0 48	0 48	0 9	0 60	0 27	0 56	0 43	0 47	0 44	0 28	0 4	0 13	0 7	0 24	0 19	0 9	0 57	0 50	0 14	0 20	0 12	0 12	0 8	0 21	0 31	0 24	0 21	0 14	0 28	0 16	0 16	0 26	0 28	0 27	0 32	0 26	0 29	0 20	0 16	0 23	0 26	0 25
18	16202696	C	T	0 20	0 19	0 50	0 39	0 50	0 47	0 9	0 58	0 29	0 53	0 45	0 48	0 43	0 29	0 4	0 14	0 7	0 25	0 19	0 8	0 57	0 48	0 16	0 20	0 11	0 11	0 8	0 21	0 27	0 22	0 19	0 14	0 29	0 16	0 17	0 26	0 30	0 29	0 30	0 26	0 29	0 21	0 15	0 22	0 26	0 25
18	16202704	T	G	0 17	0 17	0 51	0 38	0 48	0 47	0 9	0 57	0 29	0 51	0 46	0 47	0 47	0 30	0 4	0 16	0 7	0 27	0 19	0 8	0 59	0 45	0 15	0 21	0 13	0 9	0 8	0 22	0 31	0 19	0 19	0 16	0 28	0 19	0 16	0 25	0 27	0 28	0 30	0 25	0 28	0 21	0 17	0 24	0 25	0 28
18	16202710	A	G	0 17	0 17	0 55	0 39	0 45	0 49	0 9	0 57	0 27	0 49	0 46	0 48	0 47	0 31	0 4	0 14	0 7	0 26	0 20	0 8	0 59	0 46	0 17	0 19	0 13	0 9	0 7	0 22	0 30	0 18	0 18	0 17	0 28	0 19	0 14	0 22	0 28	0 28	0 29	0 25	0 25	0 21	7 8	0 24	0 24	0 25
18	16202713	G	A	0 17	0 16	0 57	0 40	0 43	0 50	0 10	0 56	0 28	0 47	0 46	0 47	0 45	0 31	0 4	0 14	0 8	0 26	0 18	0 9	0 60	0 47	0 18	0 19	0 14	0 10	0 6	0 22	0 31	0 18	0 18	0 17	0 29	1 17	0 13	0 24	0 28	0 28	0 29	0 25	0 28	0 19	0 15	0 21	0 23	0 26
18	16202747	CGTG	TGTA	0 16	0 16	0 50	0 37	0 36	0 43	0 12	0 46	0 23	0 35	0 35	0 38	0 41	0 30	0 7	0 16	0 7	0 20	0 14	0 14	0 41	0 40	0 15	0 16	0 14	0 8	0 7	0 13	0 0	0 0	0 0	0 0	0 14	0 0	0 0	0 0	0 0	0 0	0 0	0 0	0 0	0 0	0 0	0 0	0 0	0 0
18	16202748	GTG	ATA	0 16	0 16	0 50	0 37	0 36	0 43	0 12	0 46	0 23	0 35	0 35	0 38	0 41	0 30	0 7	0 16	0 7	0 20	0 14	0 14	0 41	0 40	0 15	0 16	0 14	0 8	0 7	0 13	15 0	5 0	9 0	9 0	0 14	0 0	0 0	0 0	0 0	0 0	0 0	0 0	0 0	0 0	0 0	0 0	0 0	0 0
18	16202750	G	A	0 16	0 16	0 50	0 37	0 36	0 43	0 12	0 46	0 23	0 35	0 35	0 38	1 41	0 30	0 7	0 16	0 7	0 20	0 14	0 14	0 41	0 40	0 15	0 16	0 14	0 8	0 7	0 13	15 0	14 0	12 0	6 0	16 14	23 0	18 0	25 0	26 0	29 0	30 0	27 0	27 0	21 0	14 0	20 0	26 0	26 0
18	16202760	A	T	0 19	0 17	0 52	0 43	0 42	0 43	0 13	0 48	0 26	0 39	0 35	0 43	0 46	0 32	0 8	0 15	0 8	0 23	0 13	0 14	0 44	0 40	0 16	0 18	0 15	0 9	0 7	0 13	0 37	0 25	0 24	0 16	0 29	0 24	0 20	0 24	0 29	0 30	0 30	0 26	0 27	0 23	0 16	0 21	0 23	0 25
18	16202766	T	G	0 19	0 18	0 54	0 44	0 45	0 41	0 14	0 48	0 25	0 35	0 38	0 42	0 47	0 32	0 8	0 17	0 8	0 23	0 14	0 15	0 45	0 41	0 18	0 19	0 16	0 9	0 6	0 11	0 38	0 25	0 27	0 15	0 30	0 25	0 19	0 24	0 29	0 30	0 32	0 29	0 28	0 23	0 18	0 19	0 25	0 25
18	16202768	C	CTAT	0 19	0 19	0 55	0 41	0 27	0 37	0 8	0 48	0 25	0 34	0 38	0 41	0 48	0 31	0 8	0 17	0 8	0 21	0 5	0 15	0 44	0 38	0 16	0 18	0 16	0 8	0 6	0 11	0 37	0 24	0 25	0 16	0 30	0 24	0 19	0 24	0 29	0 28	0 32	0 29	0 27	0 23	0 19	0 19	0 26	0 26
18	16202768	C	T	0 19	0 19	0 55	0 41	17 27	1 37	5 8	0 48	0 25	0 34	0 38	0 41	0 48	0 31	0 8	0 17	0 8	0 21	9 5	0 15	0 44	0 38	0 16	0 18	0 16	0 8	0 6	0 11	0 37	0 24	0 25	0 16	0 30	0 24	0 19	0 24	0 29	0 28	0 32	0 29	0 27	0 23	0 19	0 19	0 26	0 26
18	16202776	C	T	0 19	0 21	0 60	0 39	0 48	0 38	0 14	0 49	0 23	0 39	0 36	0 41	0 51	0 32	0 9	0 15	0 9	0 21	0 11	0 14	0 49	0 40	0 15	0 17	0 16	0 9	0 6	0 13	0 40	0 27	0 26	0 12	0 28	0 25	0 20	0 22	0 26	0 31	0 30	0 30	0 28	0 23	0 18	0 18	0 25	0 26
18	16202788	T	A	0 15	0 20	0 49	0 15	0 42	0 26	0 13	0 34	0 21	0 20	0 0	0 16	1 20	0 0	0 5	0 9	0 10	0 20	0 10	0 13	0 14	0 28	0 11	0 14	0 11	0 8	0 5	0 10	17 0	13 0	11 0	4 0	0 8	0 0	0 0	0 0	0 0	0 0	0 0	0 0	0 0	0 0	0 0	0 0	0 0	0 0
18	16202788	TAGA	AAG	0 15	0 20	0 49	0 15	0 42	0 26	0 13	0 34	0 21	0 20	0 0	0 16	0 20	0 0	0 5	0 9	0 10	0 20	0 10	0 13	0 14	0 28	0 11	0 14	0 11	0 8	0 5	0 10	0 0	12 0	14 0	7 0	0 8	12 0	6 0	0 0	0 0	13 0	9 0	11 0	27 0	18 0	17 0	17 0	19 0	22 0
18	16202788	TAGAAAAAAAAATCAT	AAGAAAAAAAAAAGTCAA	0 15	0 20	0 49	0 15	0 42	0 26	0 13	0 34	0 21	0 20	0 0	0 16	0 20	0 0	0 5	0 9	0 10	0 20	0 10	0 13	0 14	0 28	0 11	0 14	0 11	0 8	0 5	0 10	0 0	0 0	0 0	0 0	0 8	0 0	0 0	0 0	0 0	0 0	0 0	0 0	0 0	0 0	0 0	0 0	0 0	0 0
18	16202788	TAGAAAAAAAAATCAT	AAGAAAAAAAAAGTCAA	0 15	0 20	0 49	0 15	0 42	0 26	0 13	0 34	0 21	0 20	0 0	0 16	0 20	0 0	0 5	0 9	0 10	0 20	0 10	0 13	0 14	0 28	0 11	0 14	0 11	0 8	0 5	0 10	0 0	0 0	0 0	0 0	0 8	0 0	0 0	0 0	0 0	0 0	0 0	0 0	0 0	0 0	0 0	0 0	0 0	0 0
18	16202788	TAGAAAAAAAAATCATAA	AAGAAAAAAAATCATAT	0 15	0 20	0 49	0 15	0 42	0 26	0 13	0 34	0 21	0 20	0 0	0 16	0 20	0 0	0 5	0 9	0 10	0 20	0 10	0 13	0 14	0 28	0 11	0 14	0 11	0 8	0 5	0 10	0 0	0 0	0 0	0 0	12 8	10 0	13 0	19 0	17 0	10 0	13 0	12 0	0 0	0 0	0 0	0 0	0 0	0 0
18	16202788	TAGAAAAAAAAA	AAGAAAAATAAAG	0 15	0 20	0 49	0 15	0 42	0 26	0 13	0 34	0 21	0 20	0 0	0 16	0 20	0 0	0 5	0 9	0 10	0 20	0 10	0 13	0 14	0 28	0 11	0 14	0 11	0 8	0 5	0 10	0 0	0 0	0 0	0 0	0 8	0 0	0 0	0 0	0 0	0 0	0 0	0 0	0 0	0 0	0 0	0 0	0 0	0 0
18	16202789	A	T	0 15	0 20	0 49	14 15	0 42	0 26	0 13	0 34	0 21	10 20	30 0	20 16	16 20	14 0	4 5	5 9	0 10	0 20	0 10	0 13	21 14	0 28	0 11	0 14	0 11	0 8	0 5	0 10	0 0	0 0	0 0	0 0	0 8	0 0	0 0	0 0	0 0	0 0	0 0	0 0	0 0	0 0	0 0	0 0	0 0	0 0
18	16202808	G	GA	0 15	0 21	0 53	0 40	0 45	0 39	0 16	0 44	0 31	0 37	0 44	0 44	0 54	0 26	0 9	0 16	0 16	0 20	0 15	0 15	0 46	0 32	0 13	0 22	0 14	0 11	0 6	0 10	0 40	0 38	0 31	0 13	0 24	0 24	0 21	0 22	0 19	0 27	0 27	0 23	0 29	0 19	0 19	0 23	0 21	0 27
18	16202828	A	G	0 12	0 22	0 52	0 39	0 55	0 42	0 13	0 48	0 36	0 42	0 49	0 48	0 51	0 29	0 8	0 13	0 13	0 17	0 16	0 15	0 55	0 30	0 18	0 27	0 14	0 12	0 5	0 12	23 16	24 18	0 36	0 12	0 21	0 26	0 27	0 22	0 23	0 24	0 31	0 26	0 30	0 24	0 18	0 26	0 22	0 27
18	16202837	A	G	0 12	0 19	0 55	0 43	0 58	0 40	0 13	0 50	0 35	0 44	0 50	0 45	0 47	0 30	0 8	0 14	0 15	0 17	0 17	0 18	0 55	0 27	0 20	0 28	0 12	0 13	0 4	0 12	0 38	0 41	0 36	0 11	0 20	0 27	0 28	0 27	0 24	0 25	0 34	0 27	0 29	0 25	0 19	0 26	0 23	0 24
18	16202840	T	C	0 12	0 19	0 54	0 43	0 54	0 40	0 13	0 50	0 34	0 45	0 51	0 45	0 48	0 30	0 8	0 15	0 15	0 17	0 17	0 18	0 53	0 25	0 19	0 26	0 13	0 13	0 4	0 11	0 38	0 39	0 35	0 11	0 21	0 28	0 25	0 26	0 25	0 24	0 30	0 25	0 27	0 22	0 19	0 21	0 24	0 22
18	16202842	CT	AA	0 13	0 18	0 52	0 43	0 55	0 40	0 14	0 49	0 34	0 47	0 52	0 45	0 47	0 30	0 8	0 13	0 14	0 16	0 18	0 17	0 54	0 27	0 17	0 26	0 13	0 14	0 4	0 11	0 38	0 40	0 32	0 11	0 19	0 29	0 30	0 28	0 26	0 25	0 33	0 27	0 28	0 24	0 20	0 24	0 23	0 25
18	16202846	A	G	0 14	0 18	0 53	0 44	0 59	0 43	0 14	0 49	0 33	0 49	0 54	0 43	0 49	0 32	0 8	0 13	0 13	0 16	0 18	0 15	0 56	0 27	0 18	0 25	0 13	0 12	0 4	0 11	0 35	0 39	0 32	0 12	0 18	0 26	0 28	0 25	0 24	0 22	0 31	0 25	0 27	0 20	0 20	0 25	0 25	0 24
18	16202852	A	C	0 18	0 18	0 51	0 38	0 62	0 43	0 14	0 52	0 35	0 46	0 56	0 42	0 47	0 33	0 6	0 12	0 12	0 16	0 20	0 14	0 54	0 29	0 18	0 23	0 15	0 14	0 4	0 13	0 30	0 34	0 35	0 12	11 9	15 13	21 8	25 0	25 0	8 13	18 10	14 12	0 28	0 24	0 20	0 27	0 25	0 25
18	16202858	C	A	0 17	0 16	0 47	0 40	0 61	0 41	0 14	0 51	0 37	0 45	0 57	0 40	0 47	0 33	0 6	0 13	0 11	0 16	0 19	0 14	0 50	0 31	0 17	0 20	0 15	0 15	0 4	0 14	0 29	0 37	0 35	0 12	0 19	0 26	0 30	15 14	16 13	0 23	0 28	0 29	0 26	0 22	0 19	0 22	0 26	0 25
18	16202881	AT	A	0 24	0 12	0 36	0 44	0 59	0 48	0 11	0 51	0 34	0 45	0 57	0 46	0 48	0 34	0 6	0 13	0 12	0 15	0 17	0 12	0 39	0 31	0 16	0 20	0 16	0 12	0 7	0 12	0 17	0 33	0 34	0 12	0 23	0 26	0 30	0 30	0 27	0 18	0 25	0 24	0 21	0 23	0 17	0 24	0 21	0 24
18	16202881	A	T	0 24	0 12	0 36	0 44	0 59	0 48	0 11	0 51	0 34	0 45	0 57	0 46	0 48	0 34	0 6	0 13	0 12	0 15	0 17	0 12	0 39	0 31	0 16	0 20	0 16	0 12	0 7	0 12	13 17	0 33	0 34	0 12	0 23	0 26	0 30	0 30	0 27	0 18	0 25	0 24	0 21	0 23	0 17	0 24	0 21	0 24
18	16202886	A	G	0 26	0 12	0 37	0 47	0 61	0 48	0 11	0 51	0 36	0 47	0 55	0 41	0 48	0 32	0 6	0 13	0 11	0 16	0 17	0 12	0 39	0 32	0 16	0 18	0 16	0 12	0 6	0 15	0 30	0 29	0 31	0 13	0 25	0 22	0 28	0 27	0 27	0 19	0 24	0 23	0 22	0 23	0 17	0 23	0 20	0 26
18	16202894	C	T	0 26	0 14	0 34	0 48	0 66	0 44	0 10	0 54	0 34	0 51	0 51	0 37	0 42	0 34	0 5	0 14	0 10	0 19	0 17	0 11	0 37	0 35	0 17	0 17	0 15	0 12	0 7	0 16	13 17	0 27	0 31	0 12	0 24	0 23	0 27	0 28	0 29	0 21	0 24	0 23	0 22	0 25	0 18	0 25	0 20	0 30
18	16202908	G	A	0 30	0 14	0 41	0 46	0 69	0 46	0 7	0 52	0 36	0 49	0 50	0 39	0 42	0 37	0 6	0 15	0 6	0 22	0 14	0 12	0 36	0 38	0 16	0 14	0 13	0 15	0 9	0 19	0 28	0 22	0 34	0 12	0 26	0 23	0 27	0 28	0 29	0 20	0 25	0 22	0 22	0 21	0 19	0 25	0 23	0 30
18	16202913	C	T	0 31	0 13	0 40	0 47	0 67	0 50	0 7	0 53	0 37	0 47	0 50	0 43	0 44	0 39	0 5	0 15	0 7	0 22	0 14	0 14	0 37	0 39	0 13	0 13	0 13	0 15	0 10	0 19	0 28	0 23	0 35	0 12	0 27	0 21	0 26	0 26	0 32	0 21	0 24	0 24	0 22	0 21	0 18	0 23	0 20	0 32
18	16202918	CTCG	C	0 30	0 12	0 39	0 43	0 64	0 48	0 7	0 50	0 39	0 45	0 46	0 42	0 38	0 39	0 4	0 17	0 7	0 25	0 13	0 13	0 33	0 40	0 12	0 10	0 12	0 13	0 9	0 18	0 25	0 22	0 35	0 10	0 24	0 22	0 26	0 25	0 31	0 19	0 21	0 22	0 21	0 20	0 17	0 23	0 18	0 31
18	16202925	A	T	0 31	0 13	0 42	0 49	0 66	0 49	0 9	0 49	0 40	0 49	0 47	0 44	0 43	0 38	0 4	0 20	0 6	0 27	0 13	0 14	0 37	0 41	0 13	0 12	0 13	0 14	0 12	0 21	0 27	0 29	0 38	0 10	0 25	0 22	18 8	0 25	0 31	0 18	9 13	15 8	0 22	0 18	0 17	0 27	0 18	0 30
18	16202939	C	T	0 30	0 14	0 47	0 44	0 60	0 50	0 10	0 50	0 37	0 51	0 46	0 51	0 50	0 32	0 4	0 19	0 8	0 30	0 14	0 17	0 44	0 49	0 12	0 11	0 12	0 14	0 12	0 24	0 28	0 29	0 40	0 10	0 26	0 27	0 21	0 23	0 33	0 19	0 21	0 22	0 18	0 17	0 20	0 26	0 22	0 35
18	16202942	A	G	0 30	0 14	0 48	0 44	0 61	0 49	0 9	0 50	0 35	0 51	0 45	0 49	0 49	0 30	0 3	0 18	0 8	0 28	0 14	0 16	0 43	0 49	0 12	0 12	0 13	0 13	0 12	0 24	0 28	0 30	0 37	0 9	0 26	14 13	7 14	0 22	0 33	9 10	9 10	9 13	18 0	18 0	19 0	26 0	23 0	34 0
18	16202948	T	C	0 31	0 16	0 44	0 46	0 59	0 50	0 11	0 49	0 33	0 52	0 44	0 52	0 48	0 28	0 3	0 18	0 10	0 28	0 15	0 14	0 44	0 50	0 10	0 12	0 12	0 13	0 12	0 23	0 32	0 30	0 41	0 10	0 26	0 28	0 22	0 24	0 33	0 19	0 19	0 23	0 19	0 20	0 19	0 26	0 25	0 35
18	16202950	G	A	0 31	0 18	0 43	0 46	0 56	0 51	0 11	0 48	0 33	0 52	0 44	0 51	0 49	0 26	0 3	0 18	0 10	0 26	0 13	0 13	0 42	0 48	0 10	0 14	0 11	0 13	0 12	0 21	17 15	13 16	15 24	6 4	13 13	28 0	22 0	23 0	33 0	19 0	20 0	24 0	19 0	19 0	21 0	25 0	25 0	33 0
18	16202956	T	A	0 31	0 21	0 49	0 44	0 57	0 54	0 11	0 47	0 33	0 51	0 42	0 53	0 51	0 27	0 3	0 19	0 10	0 26	0 16	0 14	0 46	0 48	0 11	0 15	0 10	0 11	0 13	0 20	0 34	0 31	0 39	0 10	0 29	0 29	0 23	0 23	0 32	0 17	0 24	0 23	0 18	0 22	0 18	0 29	0 23	0 30
18	16202979	A	G	0 35	0 23	0 50	0 40	0 60	0 50	0 13	0 48	0 32	0 48	0 47	0 53	0 51	0 28	0 4	0 17	0 11	0 25	0 17	0 14	0 54	0 48	0 15	0 15	0 12	0 10	0 9	0 23	0 28	0 32	0 49	0 12	0 29	0 28	0 17	0 23	0 34	0 20	0 21	0 23	0 17	0 18	0 21	0 28	0 27	14 18
18	16202986	T	C	0 36	0 21	0 51	0 38	0 52	0 50	0 13	0 46	0 31	0 47	0 48	0 58	0 52	0 27	0 4	0 19	0 10	0 24	0 16	0 14	0 54	0 53	0 17	0 16	0 10	0 12	0 10	0 19	0 30	0 37	0 53	0 12	0 29	0 28	0 15	0 22	0 34	0 19	0 16	0 22	0 18	0 16	0 19	0 27	0 26	0 33
18	16202993	T	C	0 39	0 22	0 52	0 41	0 51	0 50	0 13	0 45	0 31	0 47	0 53	0 56	0 56	0 26	0 4	0 19	0 12	0 22	0 17	0 15	0 58	0 49	0 15	0 17	0 10	0 11	0 9	0 21	19 12	20 21	27 27	6 6	19 12	24 0	15 0	21 0	32 0	21 0	17 0	22 0	18 0	17 0	19 0	26 0	26 0	34 0
18	16202999	CAT	C	0 41	0 23	0 50	0 45	23 27	0 48	10 3	0 40	0 31	0 46	0 50	0 49	0 51	0 24	0 3	0 19	0 12	0 21	0 15	0 15	0 55	0 46	0 13	0 17	0 9	0 7	0 9	0 20	0 29	0 41	0 50	0 11	0 30	0 22	0 16	0 21	0 31	0 23	0 18	0 21	0 17	0 17	0 17	0 24	0 28	0 33
18	16203006	GAA	G	0 40	0 26	0 44	0 42	0 45	0 39	0 14	0 38	0 34	0 41	0 51	0 43	0 48	0 25	0 4	0 20	0 11	0 15	0 15	0 13	0 48	0 42	0 15	0 17	0 10	0 7	0 8	0 18	0 31	0 39	1 41	0 10	0 33	0 24	0 16	0 20	0 28	0 21	0 17	0 18	0 17	0 18	0 20	0 26	0 27	0 30
18	16203010	AAT	C	0 40	0 26	0 44	0 42	0 45	0 39	0 14	0 38	0 34	0 41	0 51	0 43	0 48	0 25	0 4	0 20	0 11	0 15	0 15	0 13	0 48	0 42	0 15	0 17	0 10	0 7	0 8	0 18	0 31	0 39	0 41	0 10	0 33	0 24	0 16	0 20	0 28	0 21	0 17	0 18	0 17	0 18	0 20	0 26	0 27	0 30
18	16203018	G	A	0 41	0 25	0 47	0 47	0 50	0 45	0 17	0 38	0 35	0 48	0 55	0 51	0 54	0 28	0 4	0 19	0 12	0 15	0 16	0 14	0 54	0 45	0 17	0 21	0 10	0 6	0 11	0 20	0 39	0 44	1 42	0 10	0 39	0 22	0 16	0 20	0 31	0 22	0 16	0 18	0 17	0 18	0 20	0 26	0 30	0 32
18	16203026	T	C	0 44	0 27	0 44	0 48	0 51	0 45	0 16	0 40	0 35	0 43	0 56	0 51	0 52	0 32	0 4	0 16	0 14	0 16	0 15	0 13	0 53	0 49	0 14	0 19	0 12	0 7	0 9	0 18	0 39	22 22	0 42	0 11	0 41	0 24	0 15	0 18	0 30	0 23	0 16	0 17	0 18	0 18	0 20	0 25	0 30	0 36
18	16203041	C	A	0 47	0 25	0 44	0 54	0 60	0 48	0 16	0 44	0 37	0 43	0 59	0 47	0 49	0 35	0 3	0 17	0 13	0 15	0 15	0 8	0 43	0 44	0 16	0 21	0 13	0 7	0 14	0 18	0 41	0 49	0 44	0 12	0 45	0 25	0 16	0 24	0 33	0 20	0 16	0 19	0 18	0 16	0 22	0 26	0 35	0 36
18	16203046	T	G	0 43	0 27	0 47	0 52	0 62	0 47	0 14	0 46	0 40	0 45	0 59	0 45	0 51	0 35	0 3	0 15	0 13	0 16	0 16	0 8	0 42	19 24	0 16	0 20	0 14	0 9	0 13	0 19	39 0	46 0	41 0	12 0	23 21	25 0	15 0	24 0	32 0	21 0	16 0	19 0	19 0	18 0	23 0	25 0	36 0	36 0
18	16203046	TA	GG	0 43	0 27	0 47	0 52	0 62	0 47	0 14	0 46	0 40	0 45	0 59	0 45	0 51	0 35	0 3	0 15	0 13	0 16	0 16	0 8	0 42	0 24	0 16	0 20	0 14	0 9	0 13	0 19	0 0	0 0	0 0	0 0	0 21	0 0	0 0	0 0	0 0	0 0	0 0	0 0	0 0	0 0	0 0	0 0	0 0	0 0
18	16203053	CATCTTAAAGTAATTTTAC	GTA	0 29	0 18	0 39	0 40	0 51	0 37	0 11	0 24	0 19	0 19	0 20	0 14	0 20	0 18	0 1	0 11	0 8	0 13	0 14	0 5	0 15	0 34	0 11	0 18	0 10	0 8	0 13	0 16	0 30	0 36	0 27	0 12	0 36	0 22	0 16	0 22	0 30	0 19	0 14	0 16	0 17	0 17	0 20	0 20	0 32	0 32
18	16203067	T	A	0 29	0 18	0 39	0 40	0 51	0 37	0 11	14 24	16 19	0 19	0 20	0 14	0 20	0 18	0 1	0 11	0 8	0 13	0 14	0 5	0 15	0 34	0 11	0 18	0 10	0 8	0 13	0 16	0 30	0 36	0 27	0 12	0 36	0 22	0 16	0 22	0 30	0 19	0 14	0 16	0 17	0 17	0 20	0 20	0 32	0 32
18	16203069	T	G	0 29	0 18	0 39	0 40	1 51	0 37	0 11	0 24	0 19	20 19	24 20	17 14	22 20	11 18	2 1	2 11	0 8	0 13	0 14	0 5	14 15	0 34	0 11	0 18	0 10	0 8	0 13	0 16	0 30	0 36	0 27	0 12	0 36	0 22	0 16	0 22	0 30	0 19	0 14	0 16	0 17	0 17	0 20	0 20	0 32	0 32
18	16203070	A	G	0 29	0 18	0 39	0 40	0 51	0 37	0 11	0 24	0 19	0 19	0 20	0 14	0 20	0 18	0 1	0 11	0 8	0 13	0 14	0 5	0 15	0 34	0 11	0 18	0 10	0 8	0 13	0 16	0 30	0 36	0 27	0 12	0 36	0 22	0 16	0 22	0 30	0 19	0 14	0 16	0 17	0 17	0 20	0 20	0 32	0 32
18	16203094	G	C	0 43	0 17	0 58	0 47	0 62	0 49	0 19	1 52	0 40	0 47	0 53	0 38	0 39	0 38	0 4	0 17	0 16	0 20	0 19	0 14	0 37	0 44	0 13	0 20	0 12	0 9	0 14	0 16	0 34	0 41	0 35	0 14	0 45	0 22	0 19	0 26	0 33	0 18	0 18	0 20	0 18	0 22	0 20	0 21	0 29	0 36
18	16203114	C	T	0 43	0 17	0 56	0 52	0 58	0 53	0 20	0 59	0 43	0 43	0 48	0 43	0 39	0 36	0 4	0 14	0 18	0 21	0 23	0 12	0 36	0 43	0 17	0 21	0 19	0 11	0 14	0 14	0 31	0 38	0 34	0 13	0 36	0 22	0 19	15 14	0 32	0 21	0 11	0 18	0 25	0 22	0 21	0 17	0 27	0 41
18	16203120	C	T	0 44	0 17	0 57	0 56	0 57	0 52	0 18	0 59	0 41	0 41	0 49	0 39	0 38	0 36	0 4	0 16	0 19	0 20	0 23	0 12	0 38	0 44	0 15	0 20	0 20	0 12	0 14	0 14	0 28	0 37	0 34	0 12	0 33	0 22	0 19	0 31	0 32	0 22	0 10	0 17	0 24	0 21	0 21	0 19	0 27	0 42
18	16203140	C	A	0 39	0 17	0 55	0 53	0 52	0 47	0 20	0 55	0 45	0 41	0 51	0 35	0 37	0 35	0 4	0 17	0 19	0 18	0 23	0 16	0 38	0 40	0 14	0 20	0 19	0 15	0 13	0 12	0 27	0 30	0 33	0 12	0 29	0 20	0 20	0 25	0 35	0 23	0 10	0 15	0 22	0 23	0 22	0 19	0 30	0 43
18	16203144	G	A	0 37	0 18	0 55	0 49	24 26	2 45	9 11	0 53	0 41	0 44	0 50	0 36	0 37	0 36	0 4	0 15	0 19	0 17	0 23	0 16	0 37	0 42	0 14	0 16	0 16	0 14	0 15	0 13	0 27	0 31	0 32	0 11	0 30	0 21	0 19	0 24	0 35	0 24	0 11	0 16	0 23	0 21	0 24	0 20	0 28	0 43
18	16203160	T	C	0 39	0 16	0 50	0 51	0 53	0 41	0 17	0 52	0 42	0 43	0 57	0 38	0 33	0 33	0 4	0 13	0 19	0 17	0 18	0 18	0 41	0 42	0 14	0 13	0 17	0 13	0 14	0 12	0 30	0 34	0 40	0 11	0 29	0 23	0 17	0 27	0 36	0 26	0 10	0 19	0 25	0 19	0 22	0 17	14 11	0 42
18	16203184	G	A	0 35	0 18	0 47	0 57	0 53	0 45	0 19	0 48	0 40	0 40	0 62	0 44	0 44	0 32	0 4	0 7	0 21	0 15	0 14	0 14	0 40	0 44	0 15	0 12	0 18	0 15	0 15	0 13	0 37	0 31	0 40	0 14	0 32	0 23	0 19	0 23	0 32	0 26	0 11	0 20	0 27	0 21	0 27	0 22	0 27	0 37
18	16203194	GCAAT	G	0 29	0 15	0 42	0 49	0 50	0 39	0 13	0 40	0 33	0 31	0 57	0 41	0 39	0 26	0 2	0 8	0 20	0 8	0 11	0 14	0 34	0 41	0 11	0 12	0 16	0 15	0 13	0 16	0 34	13 14	0 41	8 5	0 33	0 21	0 17	0 21	0 24	0 28	0 14	0 18	0 28	0 20	0 25	0 19	0 24	0 37
18	16203196	AATCAA	GATCAT	0 29	0 15	0 42	0 49	0 50	0 39	0 13	0 40	0 33	0 31	0 57	0 41	0 39	0 26	0 2	0 8	0 20	0 8	0 11	0 14	0 34	0 41	0 11	0 12	0 16	0 15	0 13	0 16	0 34	0 14	0 41	0 5	0 33	0 21	0 17	0 21	0 24	0 28	0 14	0 18	0 28	0 20	0 25	0 19	0 24	0 37
18	16203204	A	T	1 29	0 19	0 45	0 53	0 52	0 40	0 15	0 42	0 38	0 36	0 65	0 48	0 43	0 29	0 2	0 8	0 20	0 10	0 14	0 13	0 41	0 45	0 13	0 15	0 17	0 14	0 13	0 19	0 33	0 34	0 50	0 14	0 36	11 12	10 6	24 0	12 16	0 30	6 8	9 11	0 31	0 22	0 25	0 21	0 26	0 37
18	16203210	A	G	0 30	0 18	0 46	0 49	0 55	0 43	0 15	0 41	0 35	0 37	0 66	0 49	0 46	0 28	0 2	0 7	0 22	0 11	0 15	0 14	0 41	0 42	0 12	0 14	0 17	0 14	0 14	0 22	0 36	0 37	0 50	0 13	0 39	0 24	0 18	0 27	0 28	0 29	0 12	0 18	0 31	0 23	0 25	0 22	0 26	0 36
18	16203211	A	C	0 30	0 18	0 46	0 48	0 54	0 43	0 16	0 41	0 36	0 38	0 67	0 49	0 46	22 8	0 2	0 7	0 22	0 11	0 15	0 14	0 41	0 41	0 12	0 14	0 17	0 14	0 14	0 22	0 35	0 36	0 49	0 14	0 39	0 22	0 14	0 25	0 28	0 29	0 11	0 18	0 29	0 23	0 22	0 21	0 26	0 35
18	16203216	TA	CG	0 30	0 17	0 46	0 49	0 53	0 40	0 16	0 42	0 39	0 38	0 69	0 49	0 45	0 33	0 2	0 7	0 22	0 11	0 15	0 14	0 40	0 43	0 12	0 13	0 15	0 15	0 16	0 21	0 38	0 37	0 47	0 15	0 38	0 24	0 19	0 29	0 28	0 34	0 14	0 20	0 31	0 23	0 26	0 23	0 27	0 35
18	16203218	C	T	0 31	0 18	0 46	0 49	0 51	0 42	0 18	0 42	0 36	0 38	0 70	0 49	0 44	0 35	0 2	0 7	0 23	0 13	0 14	0 14	0 41	0 45	0 13	0 14	0 15	0 15	0 18	0 22	0 38	0 38	0 47	0 16	0 39	0 22	0 19	0 30	0 27	0 34	0 15	0 20	0 32	0 24	0 26	0 23	0 26	0 34
18	16203243	A	C	0 35	0 24	0 48	0 42	0 58	0 45	0 22	0 42	0 34	0 36	0 69	0 51	0 50	0 33	0 3	0 10	0 21	0 23	0 16	0 10	0 37	0 41	0 19	0 18	0 19	0 9	0 15	0 24	0 35	0 42	0 45	0 17	0 40	0 26	0 20	0 35	0 29	0 34	0 20	0 20	0 31	0 24	0 27	0 26	0 31	0 35
18	16203247	T	A	0 36	0 23	0 44	0 41	0 58	0 46	0 21	0 39	0 34	0 36	0 69	0 50	0 50	0 34	0 3	0 10	0 24	0 24	0 17	0 10	0 39	0 42	0 20	0 18	0 18	0 9	0 13	0 23	0 33	0 39	25 20	0 15	0 40	0 26	0 20	0 37	0 31	0 35	0 21	0 20	0 30	0 24	0 27	0 23	0 30	0 35
18	16203249	T	C	0 36	0 23	0 43	0 42	0 57	0 46	0 23	0 38	0 35	0 36	0 68	0 50	0 51	0 32	0 3	0 11	0 23	0 22	0 18	0 10	0 39	0 42	0 21	0 18	0 18	0 8	0 13	0 24	0 34	0 40	0 43	0 15	0 42	0 25	0 19	0 38	0 32	0 34	0 21	0 21	0 30	0 22	0 28	0 23	0 29	0 35
18	16203249	T	G	0 36	0 23	0 43	0 42	0 57	0 46	0 23	0 38	0 35	0 36	0 68	0 50	0 51	0 32	0 3	0 11	0 23	0 22	0 18	0 10	0 39	0 42	0 21	0 18	0 18	0 8	0 13	0 24	0 34	0 40	0 43	0 15	0 42	0 25	0 19	0 38	0 32	0 34	0 21	0 21	0 30	0 22	0 28	0 23	0 29	0 35
18	16203250	T	C	0 37	0 23	0 43	0 42	0 56	0 46	0 23	0 38	0 34	0 36	0 67	0 48	0 51	0 32	0 3	0 11	0 24	0 22	0 18	0 10	0 40	0 43	0 21	0 18	0 18	0 8	0 13	0 24	0 34	0 39	0 44	0 15	0 43	0 24	0 20	0 38	0 32	0 34	0 23	0 21	0 32	0 24	0 28	0 24	0 29	0 34
18	16203252	T	A	17 19	0 22	0 42	0 42	0 57	0 46	0 24	0 39	0 34	0 38	0 65	0 47	0 50	0 34	0 3	0 11	0 24	0 21	0 18	0 11	0 40	0 44	0 20	0 17	0 18	0 8	0 13	0 23	0 33	0 40	0 44	0 14	0 41	0 24	0 21	0 37	0 32	0 34	0 24	0 21	0 32	0 23	0 28	0 24	0 30	0 36
18	16203264	A	G	0 40	0 24	0 41	0 39	0 53	0 50	0 25	0 45	0 30	0 39	0 65	0 55	0 47	0 37	0 4	0 12	0 21	0 22	0 21	0 9	0 38	0 38	0 21	0 21	0 18	0 11	0 15	0 23	0 40	0 36	0 43	0 18	0 47	0 24	0 21	0 34	0 33	0 33	0 29	0 19	0 27	0 25	0 28	0 23	0 30	0 30
18	16203264	A	T	0 40	0 24	0 41	0 39	0 53	0 50	0 25	0 45	0 30	0 39	0 65	0 55	0 47	0 37	0 4	0 12	0 21	0 22	0 21	0 9	0 38	0 38	0 21	0 21	0 18	0 11	0 15	0 23	0 40	0 36	0 43	0 18	0 47	0 24	0 21	0 34	0 33	0 33	0 29	0 19	0 27	0 25	0 28	0 23	0 30	0 30
18	16203267	A	G	0 40	0 23	0 39	0 40	0 50	0 51	0 26	0 47	0 30	0 40	0 63	0 57	0 46	0 39	0 4	0 11	0 21	0 21	0 24	0 10	0 39	0 37	0 20	0 20	0 18	0 11	0 16	0 25	0 41	0 39	0 44	0 18	0 45	0 24	0 21	0 33	0 33	0 35	0 30	0 21	0 27	0 25	0 29	0 22	0 29	0 30
18	16203273	G	T	0 41	0 23	0 41	0 38	0 48	0 52	0 30	28 20	10 19	0 40	0 61	0 63	0 49	0 40	0 4	0 14	0 19	0 20	0 22	0 9	0 42	0 36	0 20	0 21	0 18	9 3	0 17	0 23	0 36	0 40	0 36	0 17	0 46	0 24	0 22	0 35	0 33	0 33	0 31	0 21	0 28	0 25	0 29	0 22	0 29	0 27
18	16203275	A	G	0 41	0 21	0 40	0 34	0 46	0 48	0 27	0 46	0 28	0 41	0 55	0 57	0 47	0 38	0 3	0 14	0 19	0 22	0 21	0 11	0 41	0 36	0 20	0 22	0 16	0 12	0 16	0 22	0 35	0 37	0 38	0 17	0 43	0 23	0 21	0 35	0 31	0 33	0 28	0 23	0 28	0 26	0 29	0 23	0 23	0 26
18	16203275	ACATG	GCATC	0 41	0 21	0 40	0 34	0 46	0 48	0 27	0 46	0 28	0 41	0 55	0 57	0 47	0 38	0 3	0 14	0 19	0 22	0 21	0 11	0 41	0 36	0 20	0 22	0 16	0 12	0 16	0 22	0 35	0 37	0 38	0 17	0 43	0 23	0 21	0 35	0 31	0 33	0 28	0 23	0 28	0 26	0 29	0 23	0 23	0 26
18	16203279	G	A	0 41	0 21	0 40	0 34	0 46	0 48	0 27	0 46	0 28	0 41	0 55	0 57	0 47	0 38	0 3	0 14	0 19	0 22	0 21	0 11	0 41	0 36	0 20	0 22	0 16	0 12	0 16	0 22	0 35	0 37	0 38	0 17	0 43	0 23	0 21	0 35	0 31	0 33	0 28	0 23	0 28	0 26	0 29	0 23	0 23	0 26
18	16203289	G	A	0 49	0 23	0 44	0 35	0 49	0 55	0 30	33 20	11 19	0 48	0 66	0 55	0 49	0 43	0 3	0 14	0 20	0 26	0 21	0 11	0 49	0 39	0 21	0 22	0 17	10 5	0 19	0 26	0 37	0 39	0 40	0 19	0 43	0 24	0 22	0 37	0 31	0 36	0 32	0 23	0 33	0 28	0 30	0 25	0 25	0 25
18	16203292	G	A	0 48	0 24	0 40	0 35	0 48	0 54	0 31	0 52	0 30	0 47	0 68	0 53	0 49	0 42	0 3	0 13	0 20	0 28	0 22	0 12	0 48	0 37	0 21	0 23	0 16	0 15	0 17	0 25	39 0	39 0	38 0	16 0	22 22	25 0	23 0	37 0	31 0	35 0	33 0	23 0	33 0	29 0	30 0	25 0	26 0	25 0
18	16203300	A	C	0 49	0 22	0 43	0 35	0 51	24 29	0 30	0 53	0 29	0 51	1 64	0 54	0 50	0 45	0 3	0 12	0 17	0 27	0 21	0 12	25 21	0 38	0 22	0 24	0 14	0 17	3 13	10 14	0 40	0 36	0 37	0 16	0 45	0 23	0 23	0 38	0 29	0 36	0 35	0 23	0 32	0 29	0 31	0 28	0 26	0 28
18	16203364	C	T	0 44	0 19	0 36	20 21	0 54	0 51	0 24	0 53	0 44	0 46	0 60	0 37	0 48	0 40	0 6	0 10	0 17	0 21	0 18	0 16	0 52	0 50	0 17	0 22	0 17	0 19	0 17	0 17	0 33	0 34	0 37	0 20	0 40	0 41	0 32	0 36	0 36	0 34	0 36	0 18	0 36	0 32	0 37	0 28	0 31	0 37
18	16203369	T	A	0 42	0 20	0 37	0 42	1 54	0 50	0 21	0 54	0 43	0 48	0 64	0 36	0 46	0 40	0 6	0 10	0 18	0 22	0 16	0 18	0 54	0 51	0 16	0 23	0 18	0 16	0 19	0 17	0 35	0 36	0 38	0 21	0 42	0 39	0 30	0 28	0 39	0 30	0 34	0 17	0 33	0 32	0 37	0 27	0 29	0 37
18	16203372	T	C	0 43	0 18	0 35	0 41	0 54	0 48	0 20	0 53	0 40	0 48	0 64	0 35	0 45	0 39	0 5	0 9	0 18	0 23	0 16	0 18	0 53	0 49	0 16	0 24	0 18	0 17	0 18	0 17	0 33	0 34	0 37	0 21	0 39	19 23	16 17	31 0	12 26	0 31	13 19	12 6	0 35	0 30	0 37	0 27	0 32	0 36
18	16203384	G	T	0 39	0 18	0 38	0 42	0 54	0 44	0 19	0 49	0 42	0 50	0 58	16 17	0 41	0 34	0 7	0 10	0 19	0 20	0 16	0 21	0 46	0 52	0 16	0 24	0 13	0 15	0 22	0 16	0 34	0 31	0 39	0 21	0 40	0 43	0 32	0 31	0 41	0 32	0 33	0 17	0 35	0 29	0 38	0 29	0 28	0 34
18	16203388	G	C	0 41	0 21	0 36	0 43	0 53	0 41	0 19	0 51	0 44	0 49	0 57	0 33	0 40	0 35	0 6	0 11	0 19	0 23	0 17	0 21	0 45	28 26	0 16	0 25	0 15	0 13	0 21	0 17	0 34	0 35	0 39	0 22	0 45	0 44	0 32	0 33	0 40	0 31	0 34	0 18	0 35	0 30	0 38	0 28	0 27	0 33
18	16203398	TG	AA	0 42	0 21	0 37	0 44	0 52	0 45	0 19	0 54	0 46	0 52	0 54	0 37	0 44	0 37	0 7	0 12	0 20	0 24	0 15	0 22	0 46	0 50	0 15	0 21	0 14	0 13	0 19	0 18	0 30	0 42	0 43	0 20	0 41	0 43	0 33	0 27	0 35	0 28	0 34	0 16	0 32	0 31	0 35	0 29	0 29	0 33
18	16203421	AAA	GAG	0 0	0 0	0 0	0 0	32 0	3 0	11 0	29 0	24 0	0 0	0 0	0 1	0 0	19 0	0 0	0 0	0 0	0 0	10 0	10 0	0 0	25 0	0 0	0 0	0 0	7 0	9 0	0 0	34 0	40 0	39 0	21 0	19 0	45 0	32 0	27 0	38 0	27 0	33 0	13 0	29 0	28 0	36 0	28 0	32 0	37 0
18	16203423	A	G	45 0	21 0	47 0	46 0	25 0	45 0	10 0	19 0	24 0	56 0	63 0	34 1	41 0	24 0	6 0	11 0	19 0	21 0	9 0	10 0	45 0	18 0	12 0	24 0	10 0	7 0	17 0	20 0	0 0	0 0	0 0	0 0	17 0	0 0	0 0	0 0	0 0	0 0	0 0	0 0	0 0	0 0	0 0	0 0	0 0	0 0
18	16203428	TACG	AACA	0 50	0 18	0 43	0 42	0 58	0 47	0 21	0 49	0 46	0 50	0 63	0 35	0 44	0 42	0 6	0 9	0 18	0 22	0 19	0 18	0 44	0 46	0 14	0 23	0 10	0 15	0 27	0 19	0 35	0 40	0 45	0 23	0 36	0 46	0 32	0 30	0 39	0 29	0 34	0 13	0 32	0 27	0 36	0 29	0 32	0 37
18	16203431	G	A	0 50	0 18	0 43	0 42	0 58	0 47	0 21	0 49	0 46	0 50	0 63	0 35	0 44	0 42	0 6	0 9	0 18	0 22	0 19	0 18	0 44	0 46	0 14	0 23	0 10	0 15	0 27	0 19	0 35	0 40	0 45	0 23	0 36	0 46	0 32	0 30	0 39	0 29	0 34	0 13	0 32	0 27	0 36	0 29	0 32	0 37
18	16203431	G	C	0 50	0 18	0 43	0 42	0 58	0 47	0 21	0 49	0 46	0 50	0 63	0 35	0 44	1 42	0 6	0 9	0 18	0 22	0 19	0 18	0 44	0 46	0 14	0 23	0 10	0 15	0 27	0 19	0 35	0 40	0 45	0 23	0 36	0 46	0 32	0 30	0 39	0 29	0 34	0 13	0 32	0 27	0 36	0 29	0 32	0 37
18	16203439	G	A	0 48	0 18	0 46	0 43	0 59	0 53	0 21	0 48	0 49	0 55	0 74	0 39	0 48	0 46	0 6	0 11	0 18	0 20	0 17	0 19	0 46	0 48	0 13	0 22	0 8	0 16	0 24	0 18	0 37	0 45	0 48	0 25	0 42	0 48	0 31	0 32	0 38	0 28	0 34	0 12	0 29	0 28	0 34	0 32	0 29	0 38
18	16203445	G	A	0 45	0 18	0 48	0 43	0 59	0 53	0 23	0 49	0 45	0 55	0 75	0 42	0 47	0 44	0 5	0 11	0 20	0 22	0 20	0 19	0 45	0 48	0 13	0 21	0 9	0 16	0 22	0 17	0 38	0 46	0 44	0 25	0 42	0 47	0 29	0 32	0 38	0 26	0 32	0 11	0 30	0 28	0 33	0 34	0 31	0 40
18	16203449	A	G	0 46	0 19	0 49	0 42	0 60	0 51	0 21	0 48	0 43	0 55	0 77	0 41	0 47	0 43	0 4	0 12	0 20	0 24	0 19	0 18	0 45	0 48	0 13	0 20	0 10	0 15	0 21	0 17	0 40	0 48	0 46	0 26	0 42	0 46	0 30	0 32	0 40	0 27	0 31	0 12	0 33	0 30	0 30	0 31	0 31	0 37
18	16203457	T	C	0 44	0 21	0 50	0 47	0 55	0 46	0 19	0 44	0 39	0 54	0 75	0 43	0 54	0 41	0 4	0 9	0 20	0 23	0 19	0 17	0 43	0 45	0 15	0 17	0 10	0 15	0 21	0 17	0 37	0 49	0 45	0 25	0 39	0 44	0 28	0 35	0 41	0 27	0 32	0 14	0 34	0 28	0 34	0 33	0 31	0 32
18	16203466	C	A	0 45	0 21	0 48	0 48	0 56	0 49	0 20	0 45	0 35	0 54	0 75	0 41	0 51	0 38	0 5	0 10	0 21	0 20	0 19	0 15	0 41	0 45	0 17	0 19	0 11	0 13	0 24	0 24	0 36	0 50	0 45	0 26	23 21	20 25	10 17	34 0	39 0	14 11	12 18	7 5	0 35	0 31	0 32	0 34	0 28	0 34
18	16203481	T	C	0 50	0 21	0 40	0 49	0 58	0 49	0 20	0 46	0 31	0 53	0 77	0 41	0 49	0 40	0 7	0 11	0 18	0 19	0 22	0 11	0 40	0 41	0 17	0 21	0 12	0 17	0 24	0 27	0 35	0 45	0 46	0 23	0 41	0 44	0 31	0 38	0 36	0 28	0 30	0 13	0 42	0 29	0 30	0 33	0 26	0 40
18	16203486	C	T	0 50	0 21	0 39	0 45	0 56	0 53	0 20	0 46	0 29	0 50	0 80	0 47	0 49	0 37	0 7	0 11	0 16	0 18	0 21	0 11	0 39	0 40	0 19	0 21	0 11	0 17	0 23	0 27	0 32	0 47	0 44	0 23	0 42	18 25	14 17	38 0	12 26	0 26	13 19	8 6	0 37	0 29	0 29	0 32	0 29	0 39
18	16203494	GAAT	AAAC	0 47	0 22	0 37	0 43	0 59	0 53	0 19	0 42	0 25	0 47	0 78	0 45	0 45	0 37	0 7	0 9	0 17	0 17	0 23	0 12	0 35	0 41	0 17	0 22	0 11	0 15	0 25	0 27	0 33	0 44	0 45	0 22	0 44	0 41	0 29	0 38	0 37	0 22	0 31	0 15	0 39	0 27	0 27	0 35	0 31	0 38
18	16203500	A	C	0 46	0 22	0 37	0 45	0 59	0 55	0 18	0 42	0 25	0 49	0 82	0 49	0 47	0 37	0 7	0 11	0 19	0 20	0 21	0 12	0 35	0 41	0 19	0 23	0 12	0 15	0 25	0 28	0 31	0 44	26 20	0 22	0 45	0 40	0 29	0 37	0 38	0 24	0 32	0 17	0 42	0 30	0 28	0 36	0 29	0 38
18	16203511	C	T	0 43	0 22	0 43	0 44	0 56	0 57	0 16	0 40	0 29	0 47	0 84	0 51	0 51	0 30	0 6	0 12	0 18	0 24	0 22	0 15	0 37	0 38	0 20	0 25	0 12	0 14	0 29	0 30	0 28	0 41	0 46	0 22	0 49	0 37	0 29	0 36	0 36	0 25	0 35	0 20	0 35	0 31	0 28	0 35	0 28	0 35
18	16203524	T	G	0 42	0 23	0 46	0 44	0 53	0 51	0 17	0 48	0 30	0 42	0 86	0 53	0 52	0 27	0 7	0 12	0 16	0 23	0 23	0 18	0 39	0 36	0 20	0 27	0 14	0 14	0 20	0 28	0 29	0 42	0 43	0 20	0 44	0 34	0 31	0 35	0 33	0 26	0 33	0 23	0 37	0 32	0 24	0 36	0 27	0 34
18	16203547	G	T	0 43	0 28	0 47	0 43	0 59	0 51	0 21	0 54	0 34	0 43	0 77	0 55	0 46	0 31	0 6	0 8	0 19	0 24	0 24	0 17	0 43	0 37	0 21	0 26	0 11	0 18	0 26	0 31	0 31	0 37	0 49	0 18	0 44	0 33	0 31	0 32	0 35	0 26	0 33	0 27	0 37	0 34	0 24	0 38	0 24	0 33
18	16203556	ACACG	GCACA	0 41	0 24	0 47	0 39	0 55	0 53	0 24	0 54	0 32	0 46	0 75	0 55	0 38	0 34	0 6	0 6	0 20	0 22	0 21	0 20	0 44	0 19	0 19	0 24	0 14	0 16	0 23	0 30	0 29	0 35	0 47	0 14	0 19	0 19	0 15	0 0	0 0	0 13	0 15	0 16	0 39	0 30	0 20	0 37	0 21	0 31
18	16203559	C	A	0 41	0 24	0 47	0 39	0 55	0 53	0 24	0 54	0 32	0 46	0 75	0 55	0 38	0 34	0 6	0 6	0 20	0 22	0 21	0 20	0 44	0 19	0 19	0 24	0 14	0 16	0 23	0 30	0 29	0 35	0 47	0 14	0 19	0 19	0 15	0 0	0 0	0 13	0 15	0 16	0 39	0 30	0 20	0 37	0 21	0 31
18	16203560	G	A	0 41	0 24	0 47	0 39	0 55	0 53	0 24	0 54	0 32	0 46	0 75	0 55	0 38	0 34	0 6	0 6	0 20	0 22	0 21	0 20	0 44	19 19	0 19	0 24	0 14	0 16	0 23	0 30	0 29	0 35	0 47	0 14	25 19	12 19	13 15	28 0	29 0	11 13	14 15	14 16	0 39	0 30	0 20	0 37	0 21	0 31
18	16203565	A	G	0 41	0 26	0 49	0 42	0 58	0 53	0 25	0 55	0 38	0 41	0 75	0 57	0 40	0 35	0 7	0 10	0 19	0 24	0 23	0 21	0 45	0 37	0 19	0 26	0 14	0 18	0 25	0 25	0 30	0 36	0 44	0 14	0 46	0 34	0 28	0 31	0 32	0 24	0 29	0 33	0 41	0 30	0 17	0 37	0 21	0 32
18	16203579	G	A	0 40	0 28	0 53	0 44	0 53	0 57	0 27	0 56	0 38	0 40	0 72	0 55	0 40	0 38	0 5	0 14	0 18	0 24	0 19	0 22	0 51	0 42	0 22	0 22	0 14	0 14	0 22	0 22	0 33	0 34	0 45	0 14	0 50	0 33	0 27	0 28	0 29	0 25	0 28	0 32	0 38	0 33	0 19	0 37	0 22	0 34
18	16203609	T	G	0 32	0 31	0 46	0 42	0 52	0 49	0 30	0 51	0 35	0 45	0 69	0 49	0 48	0 41	0 4	0 13	0 17	0 19	0 16	0 20	0 58	0 46	0 23	0 15	0 14	0 16	0 24	0 19	0 39	0 37	0 48	0 14	0 49	0 32	0 27	0 19	0 25	0 26	0 27	0 30	0 38	0 28	0 20	0 34	0 22	0 31
18	16203611	G	A	0 29	0 30	0 45	0 42	0 52	0 46	0 31	0 50	0 34	0 45	0 69	0 49	0 49	0 41	0 4	0 12	0 17	0 19	0 16	0 19	0 57	0 44	0 23	0 16	0 14	0 16	0 25	0 18	17 17	20 16	24 26	6 9	0 47	0 32	0 27	0 19	0 24	0 27	0 27	0 31	0 38	0 27	0 19	0 35	0 22	0 29
18	16203614	C	T	0 27	0 30	0 42	0 47	0 55	0 46	0 32	0 49	0 32	0 46	0 72	0 49	0 49	0 43	0 3	0 12	0 16	0 21	0 14	0 20	0 54	0 45	0 22	0 16	0 13	0 16	0 25	0 17	0 33	0 33	0 50	0 14	0 49	0 32	0 27	0 20	0 24	0 27	0 28	0 31	0 39	0 27	0 17	0 34	0 23	0 30
18	16203634	TTA	CTC	0 28	0 29	0 36	0 46	0 48	0 48	0 27	0 38	0 35	0 48	0 68	0 41	0 52	0 51	0 4	0 12	0 11	0 19	0 17	0 18	0 50	0 50	0 21	0 18	0 12	0 15	0 25	0 21	0 36	0 41	0 39	0 12	0 43	0 29	0 21	0 14	0 26	0 27	0 25	0 27	0 29	0 27	0 20	0 31	0 22	0 22
18	16203642	A	G	0 28	0 30	0 41	0 45	0 51	0 49	0 26	0 46	0 36	0 49	0 71	0 40	0 54	0 49	0 5	0 12	0 11	0 20	0 16	0 18	0 46	0 52	0 24	0 18	0 10	0 15	0 22	0 20	0 40	0 38	0 41	0 10	0 44	0 30	0 20	0 16	0 26	0 27	0 24	2 26	0 26	0 26	0 21	0 31	0 20	0 21
18	16203654	C	T	0 29	0 28	0 38	0 42	0 48	0 42	0 26	0 46	0 36	0 47	0 68	0 42	0 53	0 45	0 6	0 11	0 10	0 21	0 16	0 16	0 52	0 48	0 23	0 18	0 5	0 16	0 20	0 17	0 41	0 42	0 41	0 9	0 42	0 30	0 20	0 18	0 25	0 28	0 25	0 28	0 26	0 25	0 19	0 30	0 21	0 22
18	16203655	G	A	0 29	0 29	0 37	0 42	0 48	0 41	0 25	0 47	0 35	0 47	0 68	0 42	0 54	0 45	0 6	0 10	0 10	0 21	0 17	0 15	0 53	0 48	0 22	0 19	0 5	0 19	0 20	0 17	0 39	0 44	0 43	0 9	0 39	0 31	0 19	0 19	0 25	0 28	0 25	0 27	0 25	0 25	0 20	0 29	0 22	0 21
18	16203692	C	T	0 30	0 28	0 45	0 48	0 44	0 42	0 21	0 45	0 41	0 48	0 71	0 43	0 54	0 40	0 10	0 3	0 8	0 22	0 19	0 15	0 58	0 51	0 26	0 23	0 2	0 19	0 12	0 18	0 37	0 50	0 39	0 8	0 28	0 28	0 18	0 22	0 27	0 34	0 24	0 26	0 31	0 22	0 18	0 25	0 21	0 27
18	16203693	G	A	0 29	0 29	0 47	0 48	0 42	0 40	0 19	0 45	0 41	0 46	0 72	0 43	0 54	0 39	0 10	0 4	0 8	0 21	0 20	0 16	0 57	0 52	0 26	0 23	0 2	0 19	0 12	0 18	0 40	0 51	0 39	0 8	0 30	0 28	0 18	0 23	0 25	0 33	0 24	0 25	0 29	0 22	0 18	0 24	0 21	0 27
18	16203693	G	C	1 29	0 29	0 47	0 48	0 42	0 40	0 19	0 45	0 41	0 46	0 72	0 43	0 54	0 39	0 10	0 4	0 8	0 21	0 20	0 16	0 57	0 52	0 26	0 23	0 2	0 19	0 12	0 18	0 40	0 51	0 39	0 8	0 30	0 28	0 18	0 23	0 25	0 33	0 24	0 25	0 29	0 22	0 18	0 24	0 21	0 27
18	16203716	G	A	0 31	0 25	0 46	0 45	0 45	0 52	0 13	0 50	0 43	0 54	0 68	0 42	0 43	0 37	0 13	0 9	0 10	0 23	0 21	0 11	0 55	0 52	0 23	0 23	0 11	0 19	0 9	0 21	0 47	0 41	0 37	0 6	0 29	0 27	0 15	0 20	0 24	0 40	0 26	0 23	0 27	0 23	0 19	0 23	0 19	0 25
18	16203723	G	C	0 30	0 24	0 47	0 44	0 44	0 52	0 10	0 54	0 43	0 54	0 70	0 48	0 42	0 36	0 14	0 9	0 10	0 22	0 18	0 12	0 54	0 49	0 23	0 21	0 11	0 20	0 9	0 19	0 42	0 39	0 39	0 6	0 27	0 25	0 17	0 20	0 27	0 38	0 25	0 22	0 26	0 24	0 16	0 24	0 19	0 21
18	16203723	G	T	0 30	0 24	0 47	0 44	0 44	0 52	0 10	0 54	0 43	0 54	0 70	0 48	0 42	0 36	0 14	0 9	0 10	0 22	0 18	0 12	0 54	0 49	0 23	0 21	0 11	0 20	0 9	0 19	0 42	0 39	0 39	0 6	0 27	0 25	0 17	0 20	0 27	0 38	0 25	0 22	0 26	0 24	0 16	0 24	0 19	0 21
18	16203727	A	C	0 29	0 25	0 47	0 43	0 46	0 51	0 10	0 53	0 41	0 53	0 70	0 49	0 38	0 33	0 14	0 9	0 10	0 22	0 18	0 13	0 53	0 48	0 25	0 17	0 9	0 19	0 9	0 18	0 42	0 42	0 39	0 6	0 28	0 27	0 18	0 20	0 27	0 38	0 25	0 21	0 27	0 22	0 17	0 23	0 19	0 22
18	16203736	T	A	0 29	0 24	0 44	0 48	0 47	0 55	0 12	0 52	0 43	0 56	0 71	0 52	0 38	0 35	0 13	0 9	0 11	0 21	0 17	0 12	0 57	0 45	0 24	0 18	0 13	0 21	0 11	0 17	0 39	0 38	0 38	0 6	21 11	25 0	17 0	20 0	24 0	35 0	24 0	20 0	25 0	20 0	15 0	20 0	17 0	21 0
18	16203743	GAA	AAG	0 27	0 24	0 41	0 46	0 44	0 54	0 16	0 48	0 40	0 57	0 67	0 52	0 35	0 35	0 11	0 10	0 11	0 22	0 17	0 12	0 57	0 43	0 23	0 17	0 14	0 20	0 12	0 17	0 20	15 17	0 18	3 2	0 13	0 0	0 0	0 0	0 0	0 0	0 0	0 0	0 0	0 0	0 0	0 0	0 0	0 0
18	16203744	A	G	0 27	0 24	0 41	0 46	0 44	0 54	0 16	0 48	0 40	0 57	0 67	0 52	0 35	0 35	0 11	0 10	0 11	0 22	0 17	0 12	0 57	0 43	0 23	0 17	0 14	0 20	0 12	0 17	0 20	0 17	0 18	0 2	0 13	0 0	0 0	0 0	0 0	0 0	0 0	0 0	0 0	0 0	0 0	0 0	0 0	0 0
18	16203745	A	G	0 27	0 24	0 41	0 46	0 44	0 54	0 16	0 48	0 40	0 57	0 67	0 52	0 35	0 35	0 11	0 10	0 11	0 22	0 17	0 12	0 57	0 43	0 23	0 17	0 14	0 20	0 12	0 17	16 20	0 17	21 18	0 2	23 13	26 0	16 0	18 0	24 0	35 0	21 0	20 0	22 0	20 0	15 0	20 0	18 0	20 0
18	16203747	T	C	0 28	0 26	0 42	0 46	22 24	1 54	7 9	31 18	28 13	0 56	0 69	0 50	0 40	17 18	0 10	0 11	0 11	0 21	0 17	0 13	0 57	0 45	0 23	0 18	0 14	9 12	0 11	0 18	0 38	0 30	0 38	0 5	0 37	0 26	0 17	0 19	0 24	0 36	0 23	0 20	0 22	0 20	0 15	0 21	0 17	0 22
18	16203752	C	T	0 25	0 26	0 44	0 45	0 43	0 54	0 15	0 50	0 43	0 55	0 71	0 51	0 40	0 34	0 10	0 12	0 11	0 19	0 17	0 14	0 59	0 45	0 22	0 19	0 14	0 21	0 12	0 19	38 0	35 0	35 0	6 0	26 12	28 0	17 0	18 0	27 0	38 0	25 0	20 0	21 0	21 0	15 0	20 0	18 0	22 0
18	16203752	CA	TT	0 25	0 26	0 44	0 45	0 43	0 54	0 15	0 50	0 43	0 55	0 71	0 51	0 40	0 34	0 10	0 12	0 11	0 19	0 17	0 14	0 59	0 45	0 22	0 19	0 14	0 21	0 12	0 19	0 0	0 0	0 0	0 0	0 12	0 0	0 0	0 0	0 0	0 0	0 0	0 0	0 0	0 0	0 0	0 0	0 0	0 0
18	16203776	A	C	0 24	0 27	0 44	0 45	0 47	0 60	0 16	0 57	0 41	0 61	0 71	0 49	0 42	0 35	0 9	0 14	0 14	0 24	0 17	0 14	0 48	0 42	0 18	0 15	0 17	0 20	0 21	0 18	0 46	0 35	0 37	0 6	0 41	0 27	0 20	0 19	0 22	0 32	0 24	0 24	0 20	0 18	0 15	0 21	0 14	0 20
18	16203786	CCAG	TCAA	0 27	0 26	0 44	0 47	0 46	0 52	0 17	0 50	0 43	0 65	0 76	0 51	0 50	0 36	0 8	0 15	0 10	0 24	0 16	0 15	0 44	0 42	0 13	0 14	0 18	0 18	0 21	0 16	0 41	0 35	0 41	0 6	0 42	0 30	0 21	0 17	0 26	0 33	0 24	0 26	0 23	0 19	0 16	0 22	0 14	0 22
18	16203790	C	T	0 28	0 29	0 45	0 48	0 49	0 51	0 17	0 54	0 43	0 65	0 77	0 53	0 50	0 38	0 8	0 15	0 11	0 24	0 17	0 15	0 47	0 41	0 11	0 16	0 18	0 19	0 22	0 16	42 0	33 0	44 0	6 0	28 15	30 0	22 0	17 0	26 0	33 0	25 0	25 0	23 0	18 0	16 0	20 0	14 0	23 0
18	16203791	G	A	0 28	0 30	0 44	0 49	0 49	0 53	0 16	0 54	0 43	0 65	0 78	0 53	0 49	0 39	0 7	0 15	0 11	0 24	0 16	0 15	0 48	0 40	0 11	0 15	0 18	0 20	0 23	0 16	0 42	0 34	0 44	0 6	0 44	0 31	0 22	0 17	0 26	0 33	0 24	0 26	0 23	0 19	0 14	0 21	0 15	0 24
18	16203791	G	T	0 28	0 30	0 44	0 49	0 49	0 53	0 16	0 54	0 43	0 65	0 78	0 53	0 49	0 39	0 7	0 15	0 11	0 24	0 16	0 15	0 48	0 40	0 11	0 15	0 18	0 20	0 23	0 16	0 42	0 34	0 44	0 6	0 44	0 31	0 22	0 17	0 26	0 33	0 24	0 26	0 23	0 19	0 14	0 21	0 15	0 24
18	16203799	C	A	0 24	0 34	0 43	0 50	0 50	0 53	0 18	0 56	0 43	0 61	0 80	0 56	0 53	0 38	0 8	0 13	0 12	0 19	0 17	0 14	0 48	0 43	0 10	0 13	0 16	0 18	0 23	0 19	0 44	0 34	0 42	0 6	0 42	0 31	0 20	0 16	0 26	0 29	0 25	0 25	0 23	0 17	0 14	0 21	0 15	0 24
18	16203807	TG	CA	0 24	0 33	0 46	0 46	0 48	0 49	0 16	0 60	0 44	0 51	0 75	0 51	0 56	0 35	0 7	0 13	0 11	0 21	0 14	0 17	0 51	0 46	0 11	0 13	0 12	0 17	0 19	0 17	0 40	0 35	0 41	0 6	0 42	0 26	0 20	0 15	0 30	0 27	0 24	0 26	0 24	0 17	0 16	0 23	0 15	0 25
18	16203810	C	A	0 25	0 35	0 49	0 49	0 52	0 50	0 17	0 63	0 43	0 53	0 74	0 49	0 55	0 36	0 6	0 14	0 12	0 21	0 13	0 17	0 54	0 46	0 11	0 14	0 12	0 16	0 19	0 18	0 41	0 37	0 41	0 6	0 43	0 27	0 20	13 1	15 13	0 26	0 22	0 23	0 24	0 17	0 16	0 23	0 15	0 24
18	16203824	T	C	0 27	0 41	0 53	0 52	0 50	0 53	0 17	0 61	0 39	0 54	0 69	0 51	0 58	0 37	0 6	0 11	0 12	0 22	0 13	0 15	0 50	0 44	0 13	0 18	0 15	0 17	0 19	0 16	0 43	0 40	0 44	0 7	0 40	0 28	0 20	0 12	0 26	0 27	0 24	0 23	0 25	0 18	0 19	0 22	0 16	0 28
18	16203835	T	C	0 26	0 37	0 61	0 46	0 46	0 49	0 16	0 56	0 36	0 53	0 68	0 47	0 62	0 31	0 7	0 13	0 12	0 20	0 16	0 15	0 47	0 42	0 12	0 19	0 11	0 14	0 20	0 16	0 47	0 43	0 45	0 9	0 36	0 28	0 23	0 12	0 27	0 25	0 23	0 24	0 23	0 17	0 21	0 19	0 19	0 29
18	16203840	A	T	0 26	0 37	0 60	0 45	0 45	0 50	0 14	0 53	0 37	0 51	0 66	0 44	0 67	0 31	0 7	0 13	0 11	0 20	0 15	0 14	0 48	0 44	0 14	0 21	0 11	0 14	0 20	0 14	0 47	0 42	0 45	0 10	0 35	0 30	0 22	0 14	0 29	0 26	0 22	0 25	0 24	0 16	0 21	0 20	0 20	0 27
18	16203851	T	C	0 26	0 33	0 56	0 44	0 47	0 44	0 13	0 41	0 30	0 43	0 57	0 40	0 58	0 28	0 6	0 9	0 12	0 21	0 14	0 14	0 42	0 41	0 15	0 23	0 10	0 9	0 18	0 11	0 0	0 18	0 0	0 6	0 12	0 16	0 16	0 0	0 0	0 11	0 9	0 14	0 20	0 16	0 23	0 20	0 8	0 28
18	16203851	TTTCCA	CTTCCG	0 26	0 33	0 56	0 44	0 47	0 44	0 13	0 41	0 30	0 43	0 57	0 40	0 58	0 28	0 6	0 9	0 12	0 21	0 14	0 14	0 42	0 41	0 15	0 23	0 10	0 9	0 18	0 11	0 0	0 18	0 0	0 6	0 12	0 16	0 16	0 0	0 0	0 11	0 9	0 14	0 20	0 16	0 23	0 20	0 8	0 28
18	16203853	TCCA	CCG	0 26	0 33	0 56	0 44	0 47	0 44	0 13	0 41	0 30	0 43	0 57	0 40	0 58	0 28	0 6	0 9	0 12	0 21	0 14	0 14	0 42	0 41	0 15	0 23	0 10	0 9	0 18	0 11	0 0	0 18	0 0	0 6	0 12	0 16	0 16	0 0	0 0	0 11	0 9	0 14	0 20	0 16	0 23	0 20	0 8	0 28
18	16203856	A	G	0 26	0 33	0 56	0 44	0 47	0 44	0 13	0 41	0 30	0 43	0 57	0 40	0 58	0 28	0 6	0 9	0 12	0 21	0 14	0 14	0 42	0 41	0 15	0 23	0 10	0 9	0 18	0 11	34 0	21 18	41 0	5 6	17 12	10 16	6 16	12 0	27 0	11 11	8 9	8 14	0 20	0 16	0 23	0 20	11 8	0 28
18	16203861	T	C	0 27	0 31	0 60	0 50	0 50	0 51	0 15	0 43	0 34	0 47	0 63	0 43	0 62	0 29	0 8	0 9	0 11	0 22	0 15	0 15	0 46	0 50	0 15	0 21	0 11	0 12	0 20	0 11	0 37	0 43	0 45	0 12	0 30	0 27	0 23	0 14	0 28	0 21	0 18	0 21	0 25	0 19	0 22	0 21	0 20	0 31
18	16203862	A	C	0 27	0 30	0 60	0 50	0 51	0 51	0 13	0 44	0 34	0 46	0 63	0 47	0 62	0 29	0 8	0 9	0 11	0 22	0 15	0 15	0 44	0 50	0 15	0 22	0 11	0 11	0 20	0 12	0 37	21 22	0 45	6 6	0 29	0 26	0 21	0 14	0 27	0 21	0 18	0 20	0 25	0 19	0 23	0 22	0 19	0 31
18	16203870	A	G	0 27	0 32	0 56	0 42	0 51	0 48	0 12	0 39	0 31	0 46	0 63	0 43	0 65	0 29	0 7	0 11	0 10	0 21	0 16	0 14	0 45	0 45	0 15	0 21	0 11	0 11	0 15	0 14	0 19	20 22	23 17	6 6	19 12	27 0	24 0	12 0	23 0	19 0	17 0	22 0	25 0	18 0	27 0	22 0	20 0	28 0
18	16203870	ATTA	GTTG	0 27	0 32	0 56	0 42	0 51	0 48	0 12	0 39	0 31	0 46	0 63	0 43	0 65	0 29	0 7	0 11	0 10	0 21	0 16	0 14	0 45	0 45	0 15	0 21	0 11	0 11	0 15	0 14	16 19	0 22	0 17	0 6	0 12	0 0	0 0	0 0	0 0	0 0	0 0	0 0	0 0	0 0	0 0	0 0	0 0	0 0
18	16203873	A	T	0 27	0 32	0 56	0 42	0 51	0 48	0 12	0 39	0 31	0 46	0 63	0 43	0 65	0 29	0 7	0 11	0 10	0 21	0 16	0 14	0 45	0 45	0 15	0 21	0 11	0 11	0 15	0 14	0 19	0 22	0 17	0 6	0 12	0 0	0 0	0 0	0 0	0 0	0 0	0 0	0 0	0 0	0 0	0 0	0 0	0 0
18	16203880	ATT	A	0 23	0 28	0 54	0 35	0 48	0 46	0 9	0 38	0 25	0 42	0 50	0 37	0 54	0 25	0 7	0 6	0 7	0 19	0 16	0 12	0 40	0 44	0 15	0 20	0 10	0 10	0 13	0 12	0 32	20 21	0 37	0 11	0 24	0 24	0 23	0 13	0 26	0 21	0 19	0 25	0 25	0 18	0 27	0 25	0 21	0 27
18	16203900	A	G	0 30	0 30	0 59	0 45	0 64	0 52	0 9	0 44	0 36	0 53	0 58	0 41	0 55	0 32	0 7	0 9	0 8	0 18	0 24	0 12	0 42	0 46	0 17	0 21	0 11	0 12	0 16	0 10	0 42	0 50	0 55	0 10	0 29	0 21	0 24	0 17	0 29	0 20	0 17	0 29	0 28	0 20	0 29	0 25	0 25	0 28
18	16203913	A	G	0 34	0 33	0 54	0 44	0 64	0 52	0 9	0 45	0 38	0 56	0 66	0 39	0 58	0 36	0 6	0 6	0 9	0 19	0 22	0 12	0 40	0 52	0 17	0 21	0 13	0 12	0 17	0 9	0 41	0 50	0 52	0 10	0 36	0 19	0 21	0 15	0 28	0 22	0 16	0 23	0 28	0 19	0 34	0 27	0 24	0 31
18	16203918	C	T	0 34	0 32	0 53	0 46	0 64	0 51	0 9	0 47	0 38	0 54	0 68	0 40	0 57	0 34	0 6	0 6	0 8	0 18	0 24	0 12	0 43	0 51	0 16	0 22	0 13	0 12	0 16	0 9	0 43	0 56	0 53	0 10	0 37	0 20	0 23	0 15	0 25	0 23	0 16	0 26	0 26	0 19	0 32	0 29	0 24	0 31
18	16203925	G	A	0 34	0 29	0 56	0 45	0 64	0 53	0 9	0 48	0 37	0 52	0 64	0 39	0 57	0 31	0 6	0 5	0 11	0 18	0 26	0 14	0 48	0 49	0 15	0 19	0 12	0 12	0 18	0 9	0 46	0 56	0 55	0 10	0 39	0 20	0 22	0 15	0 26	0 23	0 17	0 28	0 27	0 19	0 33	0 29	0 24	0 30
18	16203944	C	T	0 35	0 29	0 55	0 50	0 70	0 53	0 13	0 57	0 39	0 57	0 59	0 43	0 54	0 35	0 8	0 5	0 15	0 16	0 26	0 13	0 51	0 48	0 16	0 16	0 14	0 16	0 13	0 12	0 48	0 49	0 56	0 10	0 38	0 21	0 23	0 16	0 29	0 25	0 16	0 30	0 23	0 20	0 35	0 30	0 19	0 32
18	16203946	GATGT	TATGC	0 34	0 29	0 55	0 48	0 66	0 51	0 14	0 53	0 38	0 57	0 60	0 42	0 53	0 33	0 8	0 6	0 13	0 16	0 26	0 13	0 49	0 44	0 14	0 16	0 15	0 14	0 15	0 12	0 45	0 45	0 54	0 10	0 38	0 22	0 23	0 16	0 30	0 27	0 17	0 29	0 26	0 19	0 35	0 27	0 20	0 32
18	16203946	GATGT	TATGG	0 34	0 29	0 55	0 48	0 66	0 51	0 14	0 53	0 38	0 57	0 60	0 42	0 53	0 33	0 8	0 6	0 13	0 16	0 26	0 13	0 49	0 44	0 14	0 16	0 15	0 14	0 15	0 12	0 45	0 45	0 54	0 10	0 38	0 22	0 23	0 16	0 30	0 27	0 17	0 29	0 26	0 19	0 35	0 27	0 20	0 32
18	16203969	C	T	0 37	0 28	0 52	0 49	0 68	0 51	0 16	0 55	0 47	0 61	0 62	0 48	0 46	0 44	0 7	0 4	0 14	0 18	0 24	0 17	0 44	0 40	9 6	11 10	7 8	7 6	1 10	5 4	0 42	0 44	0 47	0 10	0 35	0 20	0 22	0 13	0 29	0 27	0 16	0 31	0 30	0 21	0 36	0 26	0 18	0 28
18	16203969	CGGCC	TGGCT	0 37	0 28	0 52	0 49	0 68	0 51	0 16	0 55	0 47	0 61	0 62	0 48	0 46	0 44	0 7	0 4	0 14	0 18	0 24	0 17	0 44	0 40	0 6	0 10	0 8	0 6	0 10	0 4	0 42	0 44	0 47	0 10	0 35	0 20	0 22	0 13	0 29	0 27	0 16	0 31	0 30	0 21	0 36	0 26	0 18	0 28
18	16203973	C	T	0 37	0 28	0 52	0 49	0 68	0 51	0 16	0 55	0 47	0 61	0 62	0 48	0 46	0 44	0 7	0 4	0 14	0 18	0 24	0 17	0 44	0 40	0 6	0 10	0 8	0 6	0 10	0 4	0 42	0 44	0 47	0 10	0 35	0 20	0 22	0 13	0 29	0 27	0 16	0 31	0 30	0 21	0 36	0 26	0 18	0 28
18	16203982	T	A	0 33	0 30	0 55	0 51	0 66	0 55	0 21	0 60	0 48	0 65	0 63	0 44	0 51	0 47	0 8	0 4	0 13	0 21	0 21	0 17	0 44	0 42	0 19	0 22	0 17	0 13	0 15	0 13	0 38	0 39	0 40	0 12	0 38	0 21	0 21	0 15	0 32	0 25	0 16	0 28	0 33	0 25	0 34	0 27	0 20	0 26
18	16203987	C	T	0 35	0 26	0 52	0 48	0 61	0 56	0 21	0 59	0 48	0 64	0 61	0 47	0 55	0 48	0 8	0 3	0 13	0 22	0 20	0 18	0 43	0 43	0 16	0 22	0 18	0 14	0 13	0 13	0 34	0 37	0 39	0 12	0 36	0 22	0 19	0 16	0 30	0 25	0 17	0 25	0 32	0 25	0 33	0 26	0 18	0 25
18	16204000	T	C	0 36	0 27	0 49	0 46	0 55	0 60	0 22	0 57	0 45	0 63	0 64	0 48	0 51	0 45	0 7	0 4	0 14	0 24	0 22	0 16	0 48	0 44	0 14	0 21	0 20	0 14	0 12	0 16	0 36	0 33	0 39	0 11	0 38	0 20	0 19	0 15	0 30	0 26	0 17	0 25	0 33	0 23	0 33	0 26	0 21	0 25
18	16204004	G	A	0 32	0 26	0 48	0 44	0 52	0 59	0 22	0 58	0 43	0 63	0 68	0 52	0 51	0 44	0 6	0 4	0 13	0 26	0 24	0 16	0 48	0 42	0 15	0 21	0 18	0 14	0 12	0 15	0 19	0 36	0 38	0 12	0 32	0 20	0 19	0 14	0 30	0 26	0 20	0 28	0 36	0 25	0 32	0 26	0 22	0 25
18	16204004	G	C	0 32	0 26	0 48	0 44	0 52	0 59	0 22	0 58	0 43	0 63	0 68	0 52	0 51	0 44	0 6	0 4	0 13	0 26	0 24	0 16	0 48	0 42	0 15	0 21	0 18	0 14	0 12	0 15	20 19	0 36	0 38	0 12	0 32	0 20	0 19	0 14	0 30	0 26	0 20	0 28	0 36	0 25	0 32	0 26	0 22	0 25
18	16204014	C	A	0 32	0 26	0 49	0 45	0 51	0 58	0 22	0 57	0 45	0 64	0 63	0 50	0 52	0 43	0 8	0 4	0 12	0 25	0 24	0 19	0 51	0 42	0 14	0 24	0 17	0 14	0 12	0 16	0 33	0 30	0 35	0 11	0 31	0 18	0 16	0 13	0 30	0 29	0 20	0 27	0 31	0 21	0 36	0 22	0 22	0 23
18	16204015	T	C	0 32	0 25	0 49	0 45	0 49	0 58	0 22	0 58	0 45	0 65	0 64	0 51	0 54	0 42	0 9	0 4	0 13	0 24	0 25	0 20	0 48	0 42	0 15	0 24	0 17	0 14	0 13	0 17	0 33	0 30	0 34	0 12	0 31	0 18	0 14	0 14	0 30	0 28	0 20	0 25	0 32	0 21	0 34	0 23	0 22	0 23
18	16204024	T	C	0 34	0 28	0 50	0 44	0 46	0 60	0 23	0 55	0 46	0 67	0 73	0 56	0 51	0 46	0 8	0 8	0 9	0 24	0 23	0 21	0 48	0 44	0 16	0 22	0 16	0 15	0 10	0 17	0 32	0 30	0 33	0 11	0 31	0 21	0 16	0 13	0 32	0 31	0 21	0 26	0 36	0 22	0 33	0 25	0 23	0 22
18	16204038	A	T	0 33	31 0	0 46	0 45	0 44	0 66	0 17	0 57	0 45	0 66	0 74	0 60	0 49	0 49	0 8	0 10	0 9	0 24	0 20	0 22	0 43	0 43	0 14	0 21	0 16	0 13	0 12	0 18	0 32	0 31	0 37	0 12	0 33	0 23	0 18	0 14	0 37	0 34	0 21	0 21	0 36	0 22	0 35	0 27	0 23	0 27
18	16204040	A	G	0 34	0 30	0 47	0 45	0 46	0 67	0 17	0 56	0 44	0 66	0 77	0 62	0 48	0 47	0 7	0 10	0 8	0 24	0 20	0 22	0 42	0 44	0 13	0 21	0 16	0 13	0 12	0 17	0 31	0 31	0 38	0 13	0 33	0 25	0 18	0 12	0 37	0 34	0 23	0 21	0 35	0 22	0 35	0 25	0 24	0 27
18	16204045	C	A	0 33	0 29	0 49	0 45	0 45	0 66	0 17	0 55	0 44	0 66	0 78	0 63	0 52	0 47	0 7	0 10	0 7	0 24	0 21	0 20	0 45	0 45	0 15	0 21	0 16	0 14	0 11	0 18	0 33	12 18	0 37	8 6	0 33	0 24	0 16	0 11	0 36	0 34	0 24	0 20	0 36	0 21	0 35	0 28	0 25	0 27
18	16204047	T	A	0 33	0 29	0 48	0 45	0 43	0 63	0 16	0 56	0 43	0 64	0 79	0 62	0 52	0 47	0 7	0 9	0 10	0 24	0 21	0 21	0 47	0 45	0 15	0 21	0 16	0 14	0 10	0 18	0 33	0 30	0 37	0 13	0 32	0 24	0 17	0 12	0 35	0 34	0 25	0 20	0 35	0 23	0 39	0 28	0 24	0 29
18	16204050	T	G	0 32	0 29	0 47	0 45	0 42	0 63	0 16	0 59	0 40	0 63	0 80	0 62	0 52	0 45	0 7	0 9	0 10	0 25	0 20	0 23	0 46	0 43	0 14	0 21	0 18	0 14	0 11	0 19	0 33	0 29	0 38	0 13	0 36	0 23	0 17	0 12	0 35	0 34	0 26	0 20	0 34	0 25	0 37	0 26	0 23	0 29
18	16204064	G	T	0 28	0 32	0 51	0 39	0 43	0 62	0 17	0 57	0 32	0 65	0 74	0 62	0 52	0 40	0 7	0 8	0 10	0 24	0 18	0 20	0 52	0 44	0 14	0 21	0 17	0 12	0 14	0 20	18 18	0 27	0 42	0 14	0 38	0 20	0 17	0 10	0 35	0 33	0 23	0 24	0 34	0 25	0 35	0 25	0 26	0 28
18	16204075	C	T	0 24	0 29	0 46	0 39	0 38	0 59	0 12	0 56	0 28	0 62	0 69	0 52	0 49	0 37	0 6	0 10	0 10	0 24	0 15	0 19	0 52	0 40	0 15	0 20	0 15	0 11	0 10	0 18	37 0	32 0	39 0	16 0	18 14	22 0	14 0	14 0	36 0	33 0	25 0	21 0	35 0	24 0	35 0	28 0	25 0	28 0
18	16204084	T	C	0 24	0 29	0 45	0 44	0 40	0 58	0 11	0 57	0 37	0 55	0 72	0 54	0 47	0 38	0 6	0 11	0 10	0 23	0 19	0 21	0 54	0 46	0 15	0 23	0 18	0 13	0 12	0 18	0 38	0 32	0 40	0 16	0 34	0 21	0 13	0 13	0 32	0 36	0 24	0 20	0 33	0 25	0 33	0 26	0 25	0 26
18	16204088	CCTTTTTTG	TCTTATATT	0 20	0 26	0 38	0 39	0 34	0 47	0 9	0 51	0 30	0 49	0 62	0 41	0 44	0 35	0 7	0 9	0 9	0 19	0 17	0 21	0 46	0 38	0 15	0 22	0 14	0 12	0 14	0 15	0 30	0 27	0 30	0 14	0 28	0 20	0 15	0 12	0 31	0 32	0 22	0 17	0 29	0 26	0 30	0 26	0 25	0 23
18	16204093	T	C	0 20	0 26	0 38	0 39	0 34	0 47	0 9	0 51	0 30	0 49	0 62	0 41	0 44	0 35	0 7	0 9	0 9	0 19	0 17	0 21	0 46	0 38	0 15	0 22	0 14	0 12	0 14	0 15	0 30	0 27	0 30	0 14	0 28	0 20	0 15	0 12	0 31	0 32	0 22	0 17	0 29	0 26	0 30	0 26	0 25	0 23
18	16204094	TTG	ATT	0 20	0 26	0 38	0 39	0 34	0 47	0 9	0 51	0 30	0 49	0 62	0 41	0 44	0 35	0 7	0 9	0 9	0 19	0 17	0 21	0 46	0 38	0 15	0 22	0 14	0 12	0 14	0 15	0 30	0 27	0 30	0 14	0 28	0 20	0 15	0 12	0 31	0 32	0 22	0 17	0 29	0 26	0 30	0 26	0 25	0 23
18	16204094	TTGATAT	ATTATAA	0 20	0 26	0 38	0 39	0 34	0 47	0 9	0 51	0 30	0 49	0 62	0 41	0 44	0 35	0 7	0 9	0 9	0 19	0 17	0 21	0 46	0 38	0 15	0 22	0 14	0 12	0 14	0 15	0 30	0 27	0 30	0 14	0 28	0 20	0 15	0 12	0 31	0 32	0 22	0 17	0 29	0 26	0 30	0 26	0 25	0 23
18	16204107	T	G	0 29	0 29	0 45	0 44	0 44	0 55	0 13	0 52	0 33	0 62	0 69	0 44	0 56	0 44	0 7	0 13	0 12	0 21	0 20	0 25	0 50	0 48	0 16	0 25	0 17	0 15	0 17	0 18	0 37	0 32	0 36	0 15	0 33	0 20	0 17	0 16	0 33	0 31	0 22	0 16	0 29	0 28	0 30	0 26	0 29	0 27
18	16204127	T	A	0 31	0 27	0 45	0 44	0 48	0 59	0 15	0 53	0 33	0 61	0 62	0 40	0 49	0 42	0 4	0 11	0 15	0 18	0 23	0 21	0 46	0 48	0 16	0 25	0 18	0 14	0 15	0 17	0 41	0 36	0 35	0 13	0 33	0 20	0 15	0 17	0 30	0 32	0 24	0 21	0 27	0 23	0 32	0 26	0 27	0 26
18	16204145	T	A	0 33	0 26	0 55	0 45	0 48	0 59	0 19	0 57	0 39	0 60	0 66	1 38	0 37	0 43	0 5	0 14	0 12	0 21	0 24	0 19	0 37	0 50	0 17	0 26	0 15	0 15	0 16	0 17	0 38	0 43	0 36	0 12	0 30	0 21	0 17	0 17	0 34	0 32	0 24	0 22	0 30	0 31	0 31	0 27	0 28	0 27
18	16204146	A	T	0 32	0 26	0 56	0 44	22 25	0 59	1 19	0 57	0 39	0 60	0 64	0 38	0 36	0 43	0 5	0 14	0 12	0 20	0 24	0 18	0 36	0 51	0 17	0 27	0 15	0 15	0 16	0 17	0 39	0 45	0 36	0 13	0 31	0 21	0 18	0 16	0 32	0 34	0 24	0 25	0 32	0 30	0 29	0 26	0 29	0 26
18	16204147	G	A	0 32	0 26	0 57	0 43	0 50	0 59	0 20	0 56	0 39	0 59	0 65	0 39	0 36	0 44	0 5	0 14	0 12	0 19	0 23	0 19	0 37	0 51	0 17	0 27	0 15	0 15	0 16	0 17	0 40	0 45	0 36	0 13	0 31	8 12	13 5	0 16	0 34	16 16	16 7	9 16	32 0	31 0	29 0	27 0	30 0	26 0
18	16204163	C	T	0 34	0 23	0 60	0 57	0 55	0 60	0 21	0 51	0 44	0 64	0 60	0 43	0 39	0 48	0 6	0 17	0 13	0 17	0 22	0 16	0 43	0 48	0 20	0 24	0 13	0 14	0 16	0 14	0 44	0 36	0 34	0 12	0 27	0 20	0 20	0 18	0 39	0 30	0 23	0 25	0 36	0 33	0 25	0 30	0 27	0 28
18	16204175	C	G	0 40	0 29	0 65	0 53	1 56	0 66	0 20	0 49	0 43	0 67	0 62	0 42	0 41	0 46	0 6	0 14	0 13	0 14	0 25	0 17	0 43	1 48	0 18	0 24	0 13	0 15	0 16	0 14	0 40	0 38	0 35	0 13	0 29	0 20	0 17	0 20	0 34	0 31	0 20	0 26	0 31	0 30	0 24	0 27	0 28	0 27
18	16204179	T	C	0 42	0 30	0 67	0 49	0 56	0 65	0 20	0 47	0 42	0 70	0 63	0 41	0 42	0 47	0 6	0 13	0 12	0 14	13 11	7 9	0 42	0 47	0 17	0 22	0 13	0 15	5 10	0 16	0 38	0 40	0 35	0 13	0 30	0 22	0 17	0 24	0 33	0 32	0 21	0 24	0 32	0 35	0 26	0 29	0 27	0 26
18	16204197	G	T	0 39	0 28	0 71	0 49	0 53	0 62	0 19	27 21	25 12	0 68	0 59	0 50	0 39	0 41	0 4	0 14	0 13	0 13	0 24	0 12	0 46	0 42	0 14	0 19	0 12	9 6	0 15	0 14	0 41	0 38	0 30	0 15	0 27	0 23	0 18	0 25	0 33	0 31	0 19	0 26	0 37	0 34	0 22	0 32	0 29	0 21
18	16204202	C	A	0 38	0 26	0 73	0 52	0 55	0 62	0 20	0 47	0 40	0 64	0 57	0 47	0 37	0 40	0 4	0 13	0 13	0 15	0 26	0 13	0 44	0 42	0 15	0 19	0 12	0 13	0 15	0 14	0 37	0 38	0 34	0 16	0 29	0 23	0 19	0 26	0 34	0 34	0 19	0 30	0 37	0 33	0 22	0 29	0 28	0 23
18	16204208	A	C	0 37	0 26	0 71	0 55	0 52	0 62	0 20	0 47	0 45	0 67	0 60	0 49	0 40	0 42	0 4	0 11	0 12	0 16	0 25	0 12	0 50	0 43	0 15	0 18	0 11	0 12	0 14	0 13	0 37	0 35	0 36	0 16	0 31	0 25	0 18	0 27	0 36	0 35	0 20	0 26	0 36	0 32	0 22	0 28	0 29	0 21
18	16204210	AG	A	0 36	0 26	0 69	0 53	0 49	0 61	0 19	0 46	0 44	0 67	0 57	0 46	0 38	0 40	0 5	0 11	0 11	0 15	0 24	0 13	0 50	0 42	0 14	0 18	0 10	0 11	0 14	0 13	0 35	0 39	0 33	0 16	0 31	0 26	0 18	0 27	0 34	0 36	0 19	0 26	0 36	0 32	0 23	0 28	0 26	0 22
18	16204214	T	A	0 35	0 25	0 68	0 56	0 51	0 61	0 19	0 47	0 45	0 66	0 61	0 43	0 39	0 43	0 6	0 11	0 11	0 16	12 11	0 13	0 50	0 39	0 15	0 18	0 10	0 11	0 14	0 13	0 35	0 42	0 34	0 16	0 30	0 27	0 18	0 28	0 34	0 36	0 19	0 26	0 36	0 31	0 26	0 27	0 26	0 22
18	16204217	A	G	0 34	0 27	0 68	0 58	0 51	0 62	0 19	0 44	0 47	0 65	0 60	18 25	0 39	0 46	0 5	0 11	0 11	0 16	0 20	0 13	0 48	0 38	0 14	0 15	0 9	0 11	0 14	0 11	0 36	0 39	0 33	0 16	0 31	0 27	0 17	0 26	0 34	0 35	0 18	0 28	0 37	0 31	0 26	0 25	0 26	0 22
18	16204219	G	A	0 34	0 28	0 65	0 57	0 49	0 62	0 20	0 44	0 46	0 62	0 59	0 43	0 38	0 47	0 5	0 11	0 11	0 15	0 21	0 12	0 50	0 37	0 14	0 16	0 9	0 11	0 14	0 11	0 37	0 39	0 34	0 16	0 31	0 26	0 17	0 25	0 34	0 36	0 19	0 28	0 34	0 29	0 25	0 25	0 27	0 21
18	16204220	G	T	0 34	0 28	0 65	0 56	0 50	0 61	0 20	0 42	0 45	0 61	0 60	0 42	0 38	0 45	0 5	0 12	0 11	0 16	0 21	0 12	0 50	0 36	0 14	0 16	0 9	0 11	0 15	0 11	0 36	0 40	13 20	0 16	0 32	0 25	0 18	0 26	0 33	0 36	0 19	0 26	0 35	0 29	0 26	0 26	0 27	0 21
18	16204225	A	C	0 33	0 27	0 66	0 57	26 22	0 57	7 13	19 22	24 19	0 62	0 58	0 43	0 40	22 22	0 5	0 12	0 10	0 18	11 10	6 7	1 54	20 17	0 15	0 14	0 10	7 3	5 10	0 11	33 0	41 0	36 0	14 0	12 22	27 0	20 0	26 0	34 0	34 0	19 0	28 0	35 0	30 0	29 0	25 0	30 0	22 0
18	16204230	A	G	0 31	0 26	0 71	0 57	0 51	0 55	0 20	0 41	0 44	0 61	1 57	0 43	0 43	0 45	0 4	0 14	1 9	0 19	0 22	0 15	0 55	0 36	0 15	0 17	0 12	0 11	0 16	0 11	0 35	0 39	0 40	0 14	0 31	0 28	0 19	0 25	0 36	0 32	0 19	0 28	0 34	0 32	0 29	0 28	0 30	0 22
18	16204235	G	T	0 33	0 26	0 69	0 55	0 51	0 54	0 20	14 23	22 19	0 63	0 62	0 42	0 44	0 42	0 5	0 14	0 10	0 17	0 21	0 16	0 56	0 35	0 13	0 17	0 13	8 6	0 17	0 11	0 33	0 35	0 40	0 14	0 31	0 27	0 18	0 26	0 37	0 32	0 21	0 30	0 36	0 28	0 28	0 27	0 32	0 20
18	16204245	C	T	0 35	0 23	0 60	0 56	0 53	0 49	0 19	0 38	0 39	0 62	0 59	0 40	0 50	0 39	0 4	0 12	0 9	0 18	0 20	0 14	0 62	0 33	0 12	0 15	0 15	0 12	0 18	0 12	0 35	0 36	0 38	0 14	0 27	0 30	0 21	0 25	0 37	0 34	0 21	0 32	0 35	0 29	0 33	0 27	0 33	0 21
18	16204259	CCG	TCA	0 43	0 21	0 57	0 51	0 19	0 45	0 11	0 24	0 18	0 58	0 64	0 39	0 49	0 15	0 5	0 11	0 10	0 18	0 10	0 11	0 56	0 15	0 11	0 13	0 15	0 8	0 12	0 15	0 0	0 21	0 0	0 13	0 20	0 0	0 0	0 0	0 0	0 0	0 0	0 0	0 0	0 0	0 0	0 0	0 0	0 0
18	16204261	G	A	0 43	0 21	0 57	0 51	30 19	0 45	5 11	20 24	22 18	0 58	0 64	0 39	0 49	18 15	0 5	0 11	0 10	0 18	12 10	8 11	1 56	19 15	0 11	0 13	0 15	8 8	4 12	0 15	32 0	22 21	40 0	1 13	11 20	30 0	20 0	26 0	33 0	35 0	23 0	31 0	36 0	30 0	33 0	31 0	38 0	20 0
18	16204274	A	C	0 45	0 18	0 59	0 57	0 52	0 51	0 22	0 47	0 40	0 59	0 63	0 46	0 51	0 34	0 7	0 13	0 12	0 21	0 24	0 22	0 61	0 37	0 14	0 16	0 16	0 16	0 17	0 16	0 33	0 42	0 52	0 14	0 32	0 33	0 23	0 25	0 34	0 33	0 27	0 29	0 36	0 28	0 34	0 31	0 38	0 23
18	16204275	A	C	0 45	0 19	0 60	0 56	0 53	0 49	0 23	0 49	0 39	0 59	0 63	0 43	0 52	0 33	0 7	0 13	0 11	0 20	0 24	0 23	0 62	0 39	0 14	0 16	0 16	0 17	6 11	0 16	0 32	0 41	0 52	0 14	0 32	0 32	0 22	0 24	0 34	0 31	0 27	0 29	0 38	0 29	0 32	0 30	0 37	0 23
18	16204278	G	A	0 43	0 20	0 59	0 57	0 53	0 46	0 25	0 51	0 39	0 58	0 63	0 42	0 54	0 31	0 7	0 14	0 11	0 22	0 23	0 23	0 59	0 38	0 14	0 16	0 16	0 18	0 17	0 16	0 34	0 41	0 53	0 14	0 34	0 32	0 23	0 24	0 35	0 32	0 28	0 29	0 36	0 28	0 34	0 31	0 36	0 22
18	16204282	A	T	0 43	0 21	0 57	0 57	0 55	0 50	0 25	0 52	0 40	0 57	0 61	0 44	0 52	0 34	0 7	0 12	0 11	0 22	0 22	0 22	0 63	0 40	0 14	0 18	0 18	0 16	0 15	0 16	0 33	0 45	0 57	0 14	0 33	0 32	0 22	0 24	0 36	0 32	0 29	0 31	0 39	0 29	0 34	0 30	0 36	0 23
18	16204284	C	T	0 43	0 24	0 55	0 58	0 55	0 50	0 25	0 52	0 41	0 58	0 60	0 44	0 53	0 34	0 7	0 12	0 11	0 23	0 21	0 22	0 62	0 41	0 15	0 18	0 20	0 15	0 15	0 16	0 34	0 44	0 59	0 15	0 35	1 30	0 21	0 24	0 35	0 32	0 28	0 30	0 39	0 28	0 32	0 30	0 36	0 24
18	16204305	A	G	0 48	0 27	0 57	0 49	0 51	0 50	0 22	0 52	0 35	0 51	0 61	0 45	0 61	0 36	0 8	0 11	0 10	0 24	0 23	0 23	0 53	0 34	0 18	0 21	0 21	0 15	0 14	0 18	0 43	0 45	0 63	0 16	0 36	0 33	0 19	0 25	0 35	0 31	0 27	0 31	0 35	0 29	0 36	0 31	0 35	0 29
18	16204316	T	G	0 48	0 26	0 56	0 43	0 54	0 41	0 27	0 53	0 35	0 50	0 55	0 44	0 63	0 36	0 7	0 14	0 13	0 21	0 24	0 26	0 50	0 33	0 18	0 22	0 22	0 16	0 14	0 22	0 45	0 43	0 57	0 16	0 28	0 35	0 22	0 23	0 32	0 30	0 27	0 30	0 34	0 29	0 36	0 33	0 33	0 28
18	16204320	T	C	0 48	0 27	0 55	0 41	0 51	0 39	0 26	0 52	0 36	0 53	0 54	0 45	0 61	0 36	0 8	0 15	0 14	0 22	0 25	0 27	0 51	0 32	0 18	0 22	0 22	0 16	0 13	0 21	0 44	0 45	0 59	0 17	0 29	20 12	13 8	0 23	0 33	17 13	15 15	13 16	33 0	30 0	40 0	33 0	17 17	28 0
18	16204325	C	T	0 49	0 29	0 52	0 41	0 52	0 42	0 28	0 52	0 36	0 52	0 56	0 45	0 59	0 35	0 8	0 17	0 13	0 20	0 29	0 26	0 52	0 33	0 20	0 23	0 24	0 16	0 13	0 23	0 43	0 46	0 58	0 16	15 14	33 0	23 0	22 0	35 0	29 0	31 0	30 0	35 0	32 0	40 0	32 0	34 0	29 0
18	16204326	G	A	0 50	0 29	0 51	0 41	0 52	0 43	0 28	0 50	0 37	0 55	0 57	0 46	0 60	0 35	0 9	0 19	0 13	0 21	0 29	0 25	0 52	0 33	0 20	0 24	0 24	0 16	0 13	0 23	0 41	0 45	0 60	0 16	0 32	0 32	0 23	0 22	0 32	0 29	0 32	0 31	0 35	0 31	0 40	0 33	0 34	0 29
18	16204350	A	G	0 46	0 32	0 54	0 42	0 44	0 41	0 30	0 53	0 34	0 57	0 60	0 41	0 54	0 38	0 9	0 18	0 16	0 16	0 26	0 23	0 45	0 32	0 23	0 28	0 21	0 17	0 7	0 24	0 44	0 47	0 58	0 17	18 21	29 0	23 0	19 0	33 0	27 0	31 0	27 0	33 0	33 0	39 0	27 0	32 0	25 0
18	16204359	G	A	0 37	0 28	0 41	0 35	22 21	0 34	9 17	22 24	16 11	0 52	0 54	0 34	0 45	23 17	0 7	0 17	0 13	0 14	16 9	8 10	0 37	13 15	0 20	0 26	0 20	7 10	2 7	0 19	34 0	49 0	47 0	14 0	17 20	28 0	21 0	18 0	29 0	25 0	32 0	17 0	33 0	33 0	35 0	28 0	34 0	26 0
18	16204359	GCTTAAAAAT	ACATAGAAAC	0 37	0 28	0 41	0 35	0 21	0 34	0 17	0 24	0 11	0 52	0 54	0 34	0 45	0 17	0 7	0 17	0 13	0 14	0 9	0 10	0 37	0 15	0 20	0 26	0 20	0 10	0 7	0 19	0 0	0 0	0 0	0 0	0 20	0 0	0 0	0 0	0 0	0 0	0 0	0 0	0 0	0 0	0 0	0 0	0 0	0 0
18	16204378	CT	C	0 36	0 21	0 38	0 34	0 42	0 38	0 19	0 44	0 31	0 47	0 57	0 29	0 39	0 37	0 7	0 16	0 13	0 18	0 23	1 19	0 33	0 23	0 16	0 22	0 15	0 15	0 14	0 20	0 34	0 44	0 34	0 14	0 34	0 31	0 18	0 25	0 26	0 29	0 34	0 23	0 32	0 31	0 34	0 29	0 28	0 31
18	16204392	G	A	0 42	0 26	0 39	0 36	0 49	0 41	0 20	0 49	0 36	0 50	0 66	0 32	0 39	0 52	0 8	0 17	0 16	0 19	0 26	0 21	0 39	0 28	0 19	0 25	0 15	0 14	0 20	0 25	0 37	0 53	0 44	0 14	0 39	0 35	0 21	0 28	0 28	0 29	0 36	0 25	0 37	0 31	0 33	0 30	0 28	0 34
18	16204401	AGAG	TGAA	0 38	0 25	0 40	0 36	0 53	0 39	0 21	0 41	0 39	0 52	0 64	0 33	0 36	0 47	0 8	0 16	0 18	0 16	0 22	0 22	0 37	0 25	0 20	0 24	0 13	0 17	0 21	0 27	0 35	0 51	0 46	0 17	0 40	0 33	0 21	0 26	0 32	0 29	0 36	0 24	0 37	0 33	0 34	0 27	0 28	0 33
18	16204403	A	T	0 38	0 25	0 40	0 36	0 53	0 39	0 21	0 41	0 39	0 52	0 64	0 33	0 36	0 47	0 8	0 16	0 18	0 16	0 22	0 22	0 37	0 25	0 20	0 24	0 13	0 17	0 21	0 27	0 35	0 51	0 46	0 17	0 40	0 33	0 21	0 26	0 32	0 29	0 36	0 24	0 37	0 33	0 34	0 27	0 28	0 33
18	16204420	C	A	0 39	0 24	0 42	0 46	0 52	0 44	0 18	0 39	0 41	0 54	0 69	0 33	0 37	0 44	0 10	0 12	0 17	0 17	14 9	11 11	0 39	0 31	0 23	0 23	0 10	0 16	8 15	0 24	0 40	0 48	0 42	0 17	0 40	0 34	0 18	0 26	0 34	0 31	0 33	0 25	0 40	0 40	0 32	0 26	0 28	0 33
18	16204421	G	A	0 39	0 24	0 42	0 46	0 54	0 45	0 18	0 38	0 41	0 53	0 70	0 33	0 39	0 42	0 9	0 13	0 17	0 17	0 23	0 22	0 39	0 31	0 23	0 22	0 9	0 16	0 24	0 23	19 22	28 22	43 0	6 10	0 41	0 34	0 19	0 24	0 34	0 31	0 34	0 25	0 41	0 38	0 34	0 24	0 26	0 32
18	16204423	G	A	0 39	0 23	0 43	0 44	0 53	0 43	0 17	0 39	0 40	0 53	0 70	0 35	0 39	0 43	0 10	0 12	0 17	0 17	0 21	0 22	0 36	0 31	0 23	0 22	0 8	0 16	0 24	0 22	0 40	0 50	0 44	0 16	0 42	0 31	0 18	0 26	0 33	0 30	0 32	0 25	0 41	0 40	0 35	0 26	0 27	0 32
18	16204435	A	G	0 44	0 21	0 45	0 44	0 50	0 42	0 17	1 36	0 40	0 50	0 66	0 39	0 44	0 39	0 10	0 10	0 17	0 17	0 21	0 23	0 33	0 37	0 22	0 23	0 9	0 14	0 24	0 24	0 40	0 45	0 48	0 15	0 38	0 30	0 18	0 29	0 34	0 32	0 32	0 23	0 42	0 38	0 34	0 26	0 25	0 29
18	16204447	G	A	0 43	0 20	0 46	0 42	0 51	0 49	0 16	0 39	0 39	0 47	0 64	0 39	0 42	0 39	0 9	0 14	0 17	0 18	0 22	0 24	0 36	0 38	0 20	0 18	0 7	0 15	0 22	0 20	0 41	0 39	0 49	0 14	0 37	0 31	0 19	0 30	0 33	0 37	0 32	0 20	0 44	0 40	0 33	0 26	0 28	0 26
18	16204455	T	C	0 44	0 22	0 47	0 41	0 51	0 53	0 16	0 38	0 45	0 48	0 67	0 40	0 44	0 38	0 9	0 16	0 17	0 19	0 24	0 21	0 35	0 42	0 22	0 18	0 9	0 15	0 22	0 20	0 41	0 43	0 50	0 15	0 37	17 12	13 7	0 31	0 33	25 13	18 14	14 10	43 0	38 0	34 0	30 0	11 15	13 13
18	16204470	C	A	0 44	0 19	0 45	0 38	0 43	0 54	0 18	0 41	0 44	0 47	0 68	0 42	0 43	0 36	0 10	0 16	0 20	0 14	0 26	0 23	0 34	0 44	0 24	0 15	0 13	0 19	0 23	0 21	34 0	35 0	46 0	13 0	21 18	31 0	21 0	31 0	28 0	37 0	31 0	24 0	45 0	35 0	29 0	29 0	28 0	31 0
18	16204484	T	C	0 46	0 18	0 47	0 41	0 43	0 55	0 23	0 47	0 45	0 48	0 63	0 39	0 46	0 31	0 10	0 16	0 17	0 16	0 24	0 25	0 37	0 43	0 24	0 16	0 14	0 20	0 15	0 21	0 34	0 35	0 39	0 14	0 39	0 30	0 21	0 31	0 27	0 34	0 28	0 25	0 45	0 35	0 30	0 33	0 30	0 32
18	16204503	CCCA	TCC	0 40	0 14	0 42	0 39	0 31	0 51	0 21	0 46	0 41	0 44	0 62	0 35	0 47	0 23	0 7	0 17	0 15	0 12	0 24	0 24	0 36	0 44	0 15	0 14	0 16	0 19	0 15	0 17	0 34	0 32	0 33	0 13	0 38	0 34	0 17	0 28	0 26	0 32	0 29	0 27	0 46	0 33	0 26	0 32	0 33	0 32
18	16204514	G	A	0 44	0 16	0 45	0 44	0 34	0 59	0 21	0 54	0 41	0 47	0 65	0 42	0 53	0 27	0 9	0 16	0 17	0 12	0 23	0 30	0 40	0 47	0 15	0 15	0 17	0 21	0 17	0 19	0 38	0 39	0 36	0 11	0 37	0 34	0 17	0 27	0 26	0 31	0 30	0 26	0 49	0 34	0 27	0 33	20 16	0 35
18	16204518	TAGACTTTCAATCCAACTACCTCTTCAAACCTG	CAGCTACCTTTTCAAAACTT	0 17	0 6	0 25	0 29	0 19	0 31	0 12	0 36	0 24	0 30	0 36	0 19	0 29	0 15	0 5	0 6	0 9	0 9	0 9	0 23	0 23	0 12	0 7	0 8	0 11	0 12	0 9	0 11	0 16	0 17	0 14	0 9	0 20	0 9	0 6	0 16	0 19	0 8	0 11	0 9	0 0	0 0	0 0	0 0	0 14	0 0
18	16204518	TAGACTTTCAATCCAACTACCTCTTCAAACCTGCT	CAGCTACCTTTTCAAACCTTCA	0 17	0 6	0 25	0 29	0 19	0 31	0 12	0 36	0 24	0 30	0 36	0 19	0 29	0 15	0 5	0 6	0 9	0 9	0 9	0 23	0 23	0 12	0 7	0 8	0 11	0 12	0 9	0 11	0 16	0 17	0 14	0 9	0 20	0 9	0 6	0 16	0 19	0 8	0 11	0 9	0 0	0 0	0 0	0 0	0 14	0 0
18	16204521	A	G	0 17	0 6	0 25	0 29	0 19	0 31	0 12	0 36	0 24	0 30	0 36	0 19	0 29	0 15	0 5	0 6	0 9	0 9	0 9	0 23	0 23	0 12	0 7	0 8	0 11	0 12	0 9	0 11	0 16	0 17	0 14	0 9	0 20	12 9	6 6	0 16	0 19	13 8	12 11	11 9	38 0	24 0	19 0	25 0	15 14	23 0
18	16204525	T	C	0 17	0 6	0 25	0 29	0 19	0 31	0 12	0 36	0 24	0 30	0 36	0 19	0 29	0 15	0 5	0 6	0 9	0 9	0 9	0 23	0 23	0 12	0 7	0 8	0 11	0 12	0 9	0 11	8 16	0 17	0 14	0 9	0 20	0 9	0 6	0 16	0 19	0 8	0 11	0 9	0 0	0 0	0 0	0 0	0 14	0 0
18	16204526	CAATCCAACTACCTCTTCAAACCTGCTCGGCAT	C	0 17	0 6	0 25	0 29	0 19	0 31	0 12	0 36	0 24	0 30	0 36	0 19	0 29	0 15	0 5	0 6	0 9	0 9	0 9	0 23	0 23	0 12	0 7	0 8	0 11	0 12	0 9	0 11	0 16	0 17	0 14	0 9	0 20	0 9	0 6	0 16	0 19	0 8	0 11	0 9	0 0	0 0	0 0	0 0	0 14	0 0
18	16204533	ACTACCTCTTCAAACCTGCTCGG	GCTACCTCTTTAAACCTTCTCAT	0 17	0 6	0 25	0 29	0 19	0 31	0 12	0 36	0 24	0 30	0 36	0 19	0 29	0 15	0 5	0 6	0 9	0 9	0 9	0 23	0 23	0 12	0 7	0 8	0 11	0 12	0 9	0 11	0 16	0 17	0 14	0 9	0 20	0 9	0 6	0 16	0 19	0 8	0 11	0 9	0 0	0 0	0 0	0 0	0 14	0 0
18	16204541	TTCAAACCTGC	T	0 17	0 6	0 25	0 29	0 19	0 31	0 12	0 36	0 24	0 30	0 36	0 19	0 29	0 15	0 5	0 6	0 9	0 9	0 9	0 23	0 23	11 12	0 7	0 8	0 11	0 12	0 9	0 11	0 16	0 17	0 14	0 9	0 20	0 9	0 6	0 16	0 19	0 8	0 11	0 9	0 0	0 0	0 0	0 0	0 14	0 0
18	16204544	AAACCTGCTCG	GAACCTGCTCA	0 17	0 6	0 25	0 29	0 19	0 31	0 12	0 36	0 24	0 30	0 36	0 19	0 29	0 15	0 5	0 6	0 9	0 9	0 9	0 23	0 23	0 12	0 7	0 8	0 11	0 12	0 9	0 11	0 16	0 17	0 14	0 9	0 20	0 9	0 6	0 16	0 19	0 8	0 11	0 9	0 0	0 0	0 0	0 0	0 14	0 0
18	16204565	A	G	0 31	0 11	0 50	0 52	0 41	0 49	0 21	0 57	0 41	0 58	0 55	0 42	0 43	0 31	0 6	0 12	0 21	1 18	0 19	0 34	0 38	0 38	0 19	0 17	0 21	0 18	0 16	0 25	0 36	0 37	0 37	0 12	0 39	0 28	0 19	0 26	0 26	0 32	0 28	0 32	0 53	0 35	0 28	0 34	0 35	0 31
18	16204574	GATC	TATT	0 31	0 9	0 51	0 53	0 36	0 45	0 21	0 49	0 39	0 54	0 57	0 42	0 38	0 29	0 8	0 13	0 22	0 20	0 18	0 31	0 39	0 37	0 18	0 14	0 16	0 18	0 17	0 26	0 30	0 38	0 35	0 12	0 37	0 31	0 19	0 28	0 24	0 35	0 24	0 35	0 54	0 35	0 25	0 36	0 36	0 34
18	16204594	C	G	0 31	0 14	0 51	0 54	0 46	0 49	0 22	0 45	0 35	0 59	0 55	0 41	0 38	0 36	0 5	0 13	0 22	0 20	0 20	0 25	0 37	0 36	0 19	0 12	0 15	0 21	0 20	0 27	0 24	0 42	0 32	0 12	0 39	0 30	0 20	0 29	0 26	0 34	0 24	0 36	0 51	0 34	0 25	0 39	0 35	0 39
18	16204600	A	T	0 33	0 19	0 50	0 50	0 47	0 47	0 22	0 43	0 36	0 61	0 54	0 46	0 37	0 38	0 8	0 14	0 20	0 21	0 23	0 24	0 34	0 33	0 17	0 14	0 16	0 20	0 21	0 26	0 24	0 41	0 34	0 11	0 36	0 30	0 19	0 30	0 26	0 33	0 23	0 33	0 52	0 32	0 25	0 36	0 34	0 42
18	16204600	AGC	TGA	0 33	0 19	0 50	0 50	0 47	0 47	0 22	0 43	0 36	0 61	0 54	0 46	0 37	0 38	0 8	0 14	0 20	0 21	0 23	0 24	0 34	0 33	0 17	0 14	0 16	0 20	0 21	0 26	0 24	0 41	0 34	0 11	0 36	0 30	0 19	0 30	0 26	0 33	0 23	0 33	0 52	0 32	0 25	0 36	0 34	0 42
18	16204605	G	T	0 34	0 19	0 52	0 50	0 50	0 44	0 24	0 48	0 35	0 58	0 55	0 46	0 41	0 37	0 7	0 14	0 20	0 22	0 27	0 22	0 35	0 34	0 17	0 16	0 16	0 18	0 21	0 27	0 26	0 39	0 40	0 11	0 36	0 31	0 19	0 30	0 26	0 33	0 24	0 35	0 50	0 33	0 22	0 34	0 32	0 42
18	16204611	C	G	0 32	0 18	0 54	0 46	0 53	0 41	0 26	0 44	0 36	0 59	0 58	0 47	0 41	0 37	0 9	0 16	0 18	0 22	0 27	0 21	0 37	0 33	0 15	0 16	0 16	0 18	0 21	0 27	0 25	0 42	0 35	0 11	0 39	0 29	0 18	0 30	0 29	0 32	0 24	0 36	0 51	0 33	0 25	0 36	0 36	0 41
18	16204621	G	C	0 34	0 21	0 51	0 48	0 56	0 40	0 23	0 39	0 35	1 55	0 65	0 45	0 43	0 38	0 8	0 18	0 18	0 20	0 29	0 20	0 40	0 34	0 14	0 18	0 18	0 20	0 23	0 28	0 22	0 41	0 40	0 11	0 42	0 28	0 16	0 26	0 30	0 32	0 19	0 38	0 49	0 33	0 24	0 37	0 34	0 41
18	16204624	G	T	0 31	0 21	0 49	0 48	0 58	0 41	0 24	0 38	0 34	0 55	0 67	0 45	0 43	0 36	0 9	0 20	0 18	0 21	0 28	0 19	0 37	0 35	0 14	0 17	0 16	0 21	0 22	0 29	0 22	0 42	0 41	0 10	0 45	0 30	0 16	0 27	0 30	0 32	0 20	0 37	0 48	0 34	0 25	0 37	0 30	0 40
18	16204636	A	G	0 35	0 22	0 48	0 45	0 55	0 39	0 24	0 32	0 33	0 54	0 71	0 42	0 44	0 34	0 11	0 20	0 21	0 20	0 27	0 22	0 42	0 33	0 15	0 18	0 16	0 22	0 24	0 31	0 27	0 41	0 39	0 10	0 44	0 29	0 16	0 28	0 29	0 34	0 20	0 38	0 47	0 32	0 26	0 33	0 30	0 39
18	16204643	CTGCTTGATGGGTTCTAGCTGA	C	0 30	0 18	0 36	0 34	0 40	0 29	0 19	0 25	0 26	0 36	0 56	0 34	0 33	0 30	0 12	0 19	0 15	0 12	0 19	0 14	0 32	0 27	0 11	0 15	0 10	0 14	0 19	0 20	0 8	0 15	0 18	0 6	0 14	0 0	0 0	0 0	0 0	0 0	0 0	0 0	0 0	0 0	0 0	0 0	0 0	0 0
18	16204644	TG	CA	0 30	0 18	0 36	0 34	0 40	0 29	0 19	0 25	0 26	0 36	0 56	0 34	0 33	0 30	0 12	0 19	0 15	0 12	0 19	0 14	0 32	0 27	0 11	0 15	0 10	0 14	0 19	0 20	0 8	0 15	0 18	0 6	0 14	0 0	0 0	0 0	0 0	0 0	0 0	0 0	0 0	0 0	0 0	0 0	0 0	0 0
18	16204646	CTTGATGGGTTCTAGCTGAT	TTTGATGGGTTCTAGCTGAG	0 30	0 18	0 36	0 34	0 40	0 29	0 19	0 25	0 26	0 36	0 56	0 34	0 33	0 30	0 12	0 19	0 15	0 12	0 19	0 14	0 32	0 27	0 11	0 15	0 10	0 14	0 19	0 20	13 8	13 15	16 18	4 6	0 14	22 0	16 0	20 0	26 0	32 0	13 0	35 0	39 0	26 0	24 0	26 0	19 0	34 0
18	16204646	CTTGATGGGTTCTAGCTGAT	TTTGATGGGTTCTAGCTGTG	0 30	0 18	0 36	0 34	0 40	0 29	0 19	0 25	0 26	0 36	0 56	0 34	0 33	0 30	0 12	0 19	0 15	0 12	0 19	0 14	0 32	0 27	0 11	0 15	0 10	0 14	0 19	0 20	0 8	0 15	0 18	0 6	14 14	0 0	0 0	0 0	0 0	0 0	0 0	0 0	0 0	0 0	0 0	0 0	0 0	0 0
18	16204671	CCT	C	0 38	0 27	0 45	0 36	0 39	0 34	0 24	0 32	0 37	0 42	0 64	0 39	0 43	0 36	0 15	0 19	0 17	0 12	0 25	0 15	0 33	0 27	0 10	0 16	0 11	0 12	0 20	0 21	0 31	0 33	0 44	0 10	0 37	0 25	0 21	0 22	0 27	0 33	0 18	0 40	0 37	0 31	0 24	0 37	0 22	0 34
18	16204693	C	T	0 42	0 32	0 50	0 46	0 41	0 40	0 25	0 42	0 39	0 46	0 69	0 42	0 46	0 42	0 15	0 20	0 13	0 18	0 28	0 20	0 40	0 30	0 16	0 17	0 11	0 14	0 24	0 22	20 19	0 37	0 48	0 12	0 36	0 28	0 22	0 29	0 30	0 38	0 20	0 42	0 35	0 36	0 27	0 40	0 24	0 38
18	16204696	A	T	0 41	0 29	0 47	0 43	0 41	0 42	0 25	0 41	0 39	0 44	0 67	0 41	0 45	0 40	0 13	0 20	0 14	0 18	0 26	0 22	0 43	0 29	0 16	0 15	0 11	0 14	0 23	0 20	0 39	0 41	0 46	0 10	0 37	0 29	0 20	0 26	0 31	0 38	0 19	0 41	0 33	0 36	0 27	0 42	0 23	0 39
18	16204696	AAA	TAG	0 41	0 29	0 47	0 43	0 41	0 42	0 25	0 41	0 39	0 44	0 67	0 41	0 45	0 40	0 13	0 20	0 14	0 18	0 26	0 22	0 43	0 29	0 16	0 15	0 11	0 14	0 23	0 20	0 39	0 41	0 46	0 10	0 37	0 29	0 20	0 26	0 31	0 38	0 19	0 41	0 33	0 36	0 27	0 42	0 23	0 39
18	16204701	G	A	0 44	0 28	0 47	0 45	0 43	0 42	0 26	0 38	0 38	0 45	0 71	0 38	0 44	0 41	0 12	0 20	0 15	0 19	0 26	0 25	0 41	0 31	0 17	0 16	0 11	0 13	0 24	0 20	0 39	0 41	0 47	0 10	0 39	0 29	0 19	0 27	0 32	0 37	0 19	0 41	0 33	0 34	0 27	0 39	0 24	0 39
18	16204715	C	T	0 45	0 29	0 47	0 41	0 40	0 41	0 25	0 41	0 39	0 48	0 66	0 45	0 39	0 40	0 11	0 19	0 15	0 20	0 25	0 25	0 38	0 35	0 21	0 14	0 10	0 13	0 28	0 22	0 40	0 50	0 43	0 13	0 44	0 27	0 20	0 24	0 31	0 32	0 20	0 35	0 28	0 32	0 24	0 38	0 26	0 42
18	16204720	C	T	0 42	0 30	0 52	0 41	0 39	0 41	0 24	0 41	0 41	0 52	0 67	0 45	0 39	0 40	0 11	0 17	0 18	0 20	0 23	0 23	0 36	0 34	0 23	0 15	0 8	0 13	0 29	0 24	20 20	0 51	0 47	0 13	0 45	0 26	0 20	0 24	0 34	0 34	0 20	0 34	0 30	0 32	0 25	0 37	0 27	0 41
18	16204723	TGCC	T	0 40	0 30	0 49	0 39	0 38	0 39	0 24	0 43	0 40	0 49	0 63	0 42	0 36	0 39	0 9	0 14	0 15	0 18	0 24	0 22	0 36	0 32	0 21	0 12	0 9	0 10	0 29	0 22	0 39	0 49	0 46	0 12	0 41	0 25	0 20	0 24	0 35	0 35	0 20	0 34	0 26	0 33	0 27	0 34	0 27	0 37
18	16204742	T	C	0 41	0 31	0 52	0 44	0 48	0 41	0 23	0 47	0 39	0 53	0 74	0 43	0 37	0 38	0 7	0 12	0 14	0 20	0 24	0 22	0 37	0 30	0 19	0 12	0 9	0 14	0 31	0 16	0 40	0 56	0 43	0 13	0 43	0 27	0 22	0 23	0 37	0 33	0 20	0 34	0 28	0 36	0 28	0 29	0 28	0 36
18	16204748	T	A	0 41	0 29	0 50	0 43	0 45	0 43	0 21	0 44	0 40	0 53	0 67	0 42	0 37	0 38	0 8	0 12	0 14	0 19	0 23	0 22	0 36	0 30	0 20	0 13	0 9	0 15	0 31	0 15	0 38	0 60	0 47	0 12	0 40	0 28	0 21	0 22	0 36	0 32	0 21	0 34	0 27	0 35	0 28	0 31	0 29	0 32
18	16204762	G	A	0 41	0 22	0 49	0 38	0 51	0 40	0 20	0 44	0 40	0 49	0 61	0 38	0 40	0 34	0 6	0 12	0 13	0 15	0 24	0 24	0 37	0 32	0 23	0 13	0 10	0 15	0 31	0 14	0 39	0 62	0 44	0 12	0 38	0 31	0 25	0 20	0 35	0 35	0 20	0 33	0 24	0 33	0 24	0 32	0 27	0 31
18	16204764	T	C	0 42	0 22	0 50	0 41	0 50	0 42	0 20	0 43	0 41	0 49	0 62	0 36	0 43	0 34	0 6	0 12	0 14	0 16	0 21	0 23	0 38	0 31	0 24	0 13	0 10	0 15	0 31	0 14	0 39	0 62	22 21	0 13	0 39	0 31	0 24	0 19	0 35	0 35	0 20	0 33	0 25	0 33	0 25	0 32	0 24	0 31
18	16204768	T	C	0 39	0 23	0 49	0 40	0 50	0 37	0 19	0 42	0 40	0 46	0 64	0 39	0 42	0 30	0 6	0 11	0 14	0 16	0 20	0 23	0 38	0 32	0 25	0 13	0 11	0 15	0 31	0 15	0 39	0 65	0 43	0 12	0 38	0 29	0 26	0 20	0 33	0 32	0 20	0 32	0 24	0 35	0 24	0 32	16 10	0 32
18	16204769	A	G	0 41	0 26	0 49	0 39	0 50	0 39	0 19	0 43	0 41	0 45	0 63	0 38	0 44	0 30	0 6	0 12	0 14	0 16	0 20	0 24	0 36	0 32	0 26	0 13	0 11	0 15	0 31	0 15	0 41	0 64	0 46	0 13	0 37	0 29	0 27	0 20	0 34	0 33	0 20	0 34	0 26	0 35	0 24	0 32	0 28	0 30
18	16204780	C	T	0 35	0 22	0 51	0 39	0 52	0 38	0 17	0 43	0 43	0 47	0 68	0 41	0 43	0 25	0 7	0 10	0 16	0 14	0 18	0 24	0 33	0 35	0 25	0 14	0 12	0 13	0 29	0 17	0 38	0 67	0 43	0 13	0 37	0 28	0 27	0 19	0 32	0 32	0 18	0 31	0 31	0 37	0 25	0 34	0 28	0 33
18	16204786	AT	A	0 35	0 17	0 47	0 34	0 51	0 38	0 16	0 42	0 40	0 44	0 68	0 38	0 43	0 25	0 8	0 7	0 16	0 11	0 15	0 22	0 31	0 37	0 23	0 13	0 12	0 12	0 26	0 16	0 39	0 66	0 42	0 12	0 38	0 30	0 29	0 18	0 34	0 32	0 18	0 32	0 35	0 37	0 26	0 38	0 28	0 33
18	16204789	A	T	0 35	0 17	0 47	0 34	0 51	0 38	0 16	0 42	0 40	0 44	0 68	0 38	0 43	0 25	0 8	0 7	0 16	0 11	0 15	0 22	0 31	0 37	0 23	0 13	0 12	0 12	0 26	0 16	0 39	0 66	0 42	0 12	0 38	0 30	0 29	0 18	0 34	0 32	0 18	0 32	0 35	0 37	0 26	0 38	0 28	0 33
18	16204791	A	C	0 36	0 17	0 48	0 35	0 55	0 39	0 17	0 46	0 40	0 48	0 70	0 38	0 43	0 26	0 8	0 9	0 15	0 11	0 16	0 23	0 33	0 39	0 23	0 14	0 13	0 12	0 27	0 18	0 40	0 69	0 46	0 13	0 42	0 30	0 29	0 18	0 35	0 31	0 17	0 31	0 33	0 33	0 26	0 39	0 28	0 35
18	16204797	TC	CA	0 32	0 17	0 47	0 37	0 55	0 37	0 15	0 48	0 38	0 48	0 63	0 37	0 44	0 27	0 7	0 9	0 13	0 12	0 15	0 19	0 30	0 37	0 21	0 15	0 12	0 13	0 23	0 19	0 38	0 65	0 43	0 14	0 39	0 27	0 28	0 19	0 33	0 30	0 17	0 34	0 37	0 32	0 26	0 39	0 27	0 35
18	16204798	C	A	0 32	0 17	0 47	0 37	0 55	0 37	0 15	0 48	0 38	0 48	0 63	0 37	0 44	0 27	0 7	0 9	0 13	0 12	0 15	0 19	0 30	0 37	0 21	0 15	0 12	0 13	0 23	0 19	0 38	0 65	0 43	0 14	0 39	0 27	0 28	0 19	0 33	0 30	0 17	0 34	0 37	0 32	0 26	0 39	0 27	0 35
18	16204798	CA	AC	0 32	0 17	0 47	0 37	0 55	0 37	0 15	0 48	0 38	0 48	0 63	0 37	0 44	0 27	0 7	0 9	0 13	0 12	0 15	0 19	0 30	0 37	0 21	0 15	0 12	0 13	0 23	0 19	0 38	0 65	0 43	0 14	0 39	0 27	0 28	0 19	0 33	0 30	0 17	0 34	0 37	0 32	0 26	0 39	0 27	0 35
18	16204800	C	G	0 32	0 18	0 51	0 38	0 57	0 39	0 16	0 50	0 40	0 51	0 65	0 38	0 44	0 28	0 10	0 9	0 13	0 12	0 15	0 18	0 30	0 36	0 21	0 15	0 12	0 14	0 23	0 20	0 39	0 63	0 43	0 14	0 39	0 27	0 28	0 18	0 36	0 32	0 16	0 35	0 37	0 32	0 26	0 39	0 27	0 34
18	16204808	C	T	0 36	0 17	0 50	0 37	0 56	0 39	0 16	0 49	0 43	0 51	0 66	0 39	0 44	0 29	0 12	0 7	0 14	0 9	0 15	0 18	0 27	0 34	0 18	0 16	0 12	0 13	0 20	0 19	0 42	0 55	0 42	0 12	0 37	0 29	0 26	0 16	0 36	0 34	0 18	0 28	0 37	0 33	0 28	0 37	0 26	0 35
18	16204816	T	C	0 35	0 16	0 46	0 37	0 55	0 39	0 15	0 50	0 45	0 49	0 64	0 37	0 47	0 27	0 12	0 7	0 14	0 10	0 14	0 17	0 32	0 30	0 18	0 15	0 12	0 11	0 20	0 17	0 39	0 52	0 41	0 13	0 32	0 29	0 26	0 15	0 39	0 34	0 18	0 31	0 37	0 31	0 29	0 36	0 30	0 40
18	16204817	G	A	0 36	0 15	0 46	0 36	0 55	0 40	0 15	0 50	0 45	0 48	0 65	0 37	0 49	0 27	0 12	0 7	0 13	0 10	0 13	0 16	0 31	0 32	0 18	0 16	0 12	0 10	0 18	0 18	0 39	0 51	0 41	0 13	0 32	0 29	0 24	0 16	0 38	0 33	0 19	0 30	0 37	0 32	0 29	0 35	0 29	0 39
18	16204821	T	C	0 36	0 13	0 43	19 17	0 54	0 41	0 15	0 44	0 41	0 44	0 64	0 39	0 49	0 26	0 12	0 8	0 12	0 8	0 13	0 15	0 32	0 29	1 15	0 15	0 12	0 14	0 17	0 17	0 38	0 45	0 40	0 13	0 28	0 29	0 25	0 16	0 37	0 32	0 17	0 27	0 38	0 31	0 29	0 32	0 29	0 43
18	16204826	C	T	0 35	0 13	0 41	0 37	0 55	0 46	0 16	0 50	0 44	0 41	0 65	0 39	0 51	0 27	0 12	0 9	0 11	0 9	0 14	0 16	0 35	0 31	0 20	0 15	0 10	0 15	0 15	0 18	0 38	0 48	0 42	0 13	0 32	11 20	10 17	0 15	0 38	23 12	5 12	12 15	38 0	30 0	30 0	32 0	27 0	43 0
18	16204828	GA	AG	0 33	0 13	0 43	0 38	0 55	0 45	0 16	0 49	0 42	0 39	0 62	0 38	0 50	0 27	0 12	0 10	0 11	0 8	0 14	0 18	0 35	0 31	0 20	0 15	0 10	0 14	0 15	0 18	0 39	0 47	0 44	0 13	0 31	0 31	0 28	0 13	0 38	0 33	0 17	0 26	0 38	0 29	0 27	0 31	0 27	0 43
18	16204830	G	C	0 34	0 13	0 44	0 39	0 55	0 46	0 17	0 49	0 43	0 42	0 64	0 38	0 50	0 27	0 12	0 11	0 12	0 10	0 14	0 18	0 34	0 30	0 20	0 15	0 10	0 14	0 13	0 18	0 40	0 48	0 47	0 13	0 32	0 30	0 26	0 12	0 37	0 33	0 21	0 28	0 39	0 29	0 26	0 31	0 27	0 42
18	16204836	C	A	0 34	0 13	0 44	0 41	0 52	0 46	0 15	0 45	0 41	0 45	0 57	0 41	0 53	0 28	0 13	0 11	0 14	0 10	0 12	0 17	0 33	0 30	0 22	0 14	0 10	0 14	0 11	0 21	0 38	0 46	0 44	0 12	0 31	0 27	0 24	1 10	0 32	0 28	0 21	0 24	0 37	0 26	0 25	0 31	0 27	0 38
18	16204836	C	G	0 34	0 13	0 44	0 41	0 52	0 46	0 15	0 45	0 41	0 45	0 57	0 41	0 53	0 28	0 13	0 11	0 14	0 10	0 12	0 17	0 33	0 30	0 22	0 14	0 10	0 14	0 11	0 21	0 38	0 46	0 44	0 12	0 31	0 27	0 24	0 10	0 32	0 28	0 21	0 24	0 37	0 26	0 25	0 31	0 27	0 38
18	16204836	C	T	0 34	0 13	0 44	0 41	0 52	0 46	0 15	0 45	0 41	0 45	0 57	0 41	0 53	0 28	0 13	0 11	0 14	0 10	0 12	0 17	0 33	0 30	0 22	0 14	0 10	0 14	0 11	0 21	0 38	0 46	0 44	0 12	0 31	0 27	0 24	0 10	0 32	0 28	0 21	0 24	0 37	0 26	0 25	0 31	0 27	0 38
18	16204840	C	T	0 34	0 13	0 44	0 39	0 52	0 45	0 18	0 45	0 41	0 45	0 58	0 43	0 51	0 27	0 12	0 10	0 14	0 11	0 12	0 18	0 33	0 32	0 21	0 15	0 11	0 12	0 12	0 21	0 35	0 44	0 42	0 14	0 30	0 27	0 22	9 3	0 34	0 28	0 21	0 28	0 37	0 27	0 24	0 32	0 27	0 38
18	16204841	CCCTCTTTTTTTTT	ATCTCTTTTTTTC	0 27	0 8	0 35	0 32	0 24	0 41	0 4	0 21	0 16	0 31	0 51	0 39	0 34	0 11	0 9	0 8	0 11	0 10	0 3	0 8	0 27	0 17	0 14	0 10	0 8	0 3	0 5	0 18	0 0	0 0	0 0	0 0	0 13	0 0	0 0	0 0	0 0	0 0	0 0	0 0	0 0	0 0	0 0	0 0	0 0	0 0
18	16204842	CCTCTTTTTTTTT	TCTCTTTTTTTC	0 27	0 8	0 35	0 32	0 24	0 41	0 4	0 21	0 16	0 31	0 51	0 39	0 34	0 11	0 9	0 8	0 11	0 10	0 3	0 8	0 27	0 17	0 14	0 10	0 8	0 3	0 5	0 18	0 0	0 0	0 0	0 0	0 13	0 0	0 0	0 0	0 0	0 0	0 0	0 0	0 0	0 0	0 0	0 0	0 0	0 0
18	16204853	TT	C	0 27	0 8	0 35	0 32	0 24	0 41	0 4	0 21	0 16	0 31	0 51	0 39	0 34	0 11	0 9	0 8	0 11	0 10	0 3	0 8	0 27	0 17	0 14	0 10	0 8	0 3	0 5	0 18	0 0	0 0	0 0	0 0	0 13	0 0	0 0	0 0	0 0	0 0	0 0	0 0	0 0	0 0	0 0	0 0	0 0	1 0
18	16204854	T	C	0 27	0 8	0 35	0 32	18 24	0 41	8 4	19 21	12 16	0 31	0 51	0 39	0 34	11 11	0 9	0 8	0 11	0 10	4 3	5 8	0 27	8 17	0 14	0 10	0 8	7 3	3 5	0 18	14 0	29 0	32 0	13 0	0 13	24 0	23 0	11 0	16 0	18 0	17 0	25 0	34 0	27 0	25 0	28 0	23 0	28 0
18	16204854	T	TC	0 27	0 8	0 35	0 32	0 24	0 41	0 4	0 21	0 16	0 31	0 51	0 39	0 34	0 11	0 9	0 8	0 11	0 10	0 3	0 8	0 27	0 17	0 14	0 10	0 8	0 3	0 5	0 18	7 0	0 0	0 0	0 0	12 13	0 0	0 0	0 0	13 0	6 0	0 0	0 0	0 0	0 0	0 0	0 0	0 0	0 0
18	16204865	CG	GT	0 37	0 10	0 42	0 39	0 50	0 46	0 17	0 52	0 31	0 47	0 61	0 44	0 35	0 30	0 9	0 12	0 11	0 12	0 13	0 16	0 31	0 40	0 15	0 14	0 9	0 12	0 14	0 23	0 27	0 31	0 34	0 15	0 37	0 29	0 24	0 10	0 34	0 30	0 18	0 28	0 38	0 28	0 28	0 33	0 25	0 33
18	16204866	G	T	0 37	0 10	0 42	0 39	0 50	0 46	0 17	0 52	0 31	0 47	0 61	0 44	0 35	0 30	0 9	0 12	0 11	0 12	0 13	0 16	0 31	0 40	0 15	0 14	0 9	0 12	0 14	0 23	0 27	0 31	0 34	0 15	0 37	0 29	0 24	0 10	0 34	0 30	0 18	0 28	0 38	0 28	0 28	0 33	0 25	0 33
18	16204877	C	A	0 38	0 11	0 41	0 41	0 46	0 43	0 18	0 47	0 27	0 47	0 56	0 41	0 36	0 32	0 9	0 15	0 13	0 12	0 17	0 18	0 32	0 38	0 20	0 12	0 8	0 13	0 20	0 23	0 22	0 26	0 33	0 14	0 35	0 29	0 26	0 8	0 28	0 25	0 21	0 27	0 41	0 26	0 25	0 32	0 22	0 37
18	16204882	C	A	0 41	0 12	0 42	0 40	0 47	0 40	0 19	0 44	0 28	0 48	0 55	0 39	0 35	0 33	0 8	0 16	0 11	0 13	0 16	0 18	0 32	0 40	0 19	0 13	0 8	0 13	0 20	0 24	25 0	21 0	32 0	15 0	21 14	30 0	28 0	7 0	29 0	29 0	21 0	23 0	38 0	26 0	26 0	30 0	24 0	36 0
18	16204885	G	T	0 43	0 12	0 40	0 38	0 45	0 37	0 20	0 40	0 28	0 45	0 55	0 37	0 33	0 35	0 7	0 16	0 10	0 13	0 16	0 17	0 32	0 39	0 18	0 11	0 7	0 15	0 20	0 22	0 25	0 23	0 31	0 15	0 30	0 28	0 26	0 7	0 30	0 29	0 21	0 25	0 40	0 31	0 24	0 34	1 25	0 36
18	16204885	GTTC	TTTA	0 43	0 12	0 40	0 38	0 45	0 37	0 20	0 40	0 28	0 45	0 55	0 37	0 33	0 35	0 7	0 16	0 10	0 13	0 16	0 17	0 32	0 39	0 18	0 11	0 7	0 15	0 20	0 22	0 25	0 23	0 31	0 15	0 30	0 28	0 26	0 7	0 30	0 29	0 21	0 25	0 40	0 31	0 24	0 34	0 25	0 36
18	16204891	T	G	0 43	0 12	0 45	0 43	0 50	0 38	0 21	0 43	0 29	0 49	0 60	0 40	0 33	0 36	0 7	0 16	0 10	0 12	0 17	0 16	0 35	0 38	0 19	0 13	0 7	0 16	0 25	0 23	0 27	0 24	0 33	0 14	0 33	0 27	0 28	0 8	0 28	0 30	0 22	0 25	0 40	0 28	0 24	0 34	0 26	0 35
18	16204892	C	T	0 43	0 12	0 45	0 42	0 49	0 36	0 21	0 43	0 29	0 49	0 60	0 37	0 34	0 35	0 7	0 17	0 10	0 13	0 16	0 17	0 35	0 37	0 19	0 14	0 7	0 16	0 26	0 23	0 26	0 24	0 33	0 14	0 34	0 29	0 27	0 8	0 28	0 30	0 21	0 25	0 40	0 28	0 24	0 34	0 25	0 35
18	16204896	C	A	0 42	0 11	0 42	0 41	0 50	0 36	0 21	17 23	14 17	0 50	0 61	0 36	0 36	0 36	0 9	0 17	0 9	0 12	0 16	0 19	0 35	0 37	0 18	0 12	0 7	6 13	0 26	0 22	0 26	0 24	0 32	0 14	0 33	0 25	1 25	0 9	0 29	0 31	0 21	0 25	0 40	0 27	0 24	0 33	0 28	0 35
18	16204898	T	C	0 42	0 11	0 40	0 43	0 47	0 36	0 20	0 39	0 31	0 49	0 64	0 37	0 35	0 35	0 8	0 17	0 10	0 12	0 16	0 19	0 37	0 37	0 19	0 11	0 7	0 19	0 24	0 23	0 26	0 27	0 35	0 14	0 34	0 27	0 27	0 10	0 26	0 30	0 21	0 24	0 40	0 28	0 24	0 32	0 28	0 35
18	16204911	TCCCTATA	GCCCCATG	0 35	0 17	0 36	0 47	0 45	0 33	0 19	0 36	0 27	0 44	0 65	0 34	0 31	0 36	0 5	0 16	0 13	0 14	0 15	0 17	0 39	0 18	0 20	0 14	0 8	0 15	0 26	0 23	0 0	0 0	0 0	0 0	0 12	0 0	0 0	0 0	0 0	0 0	0 0	0 0	0 0	0 0	0 0	0 0	0 0	0 0
18	16204911	TCCCTATA	GCCCTATG	0 35	0 17	0 36	0 47	0 45	0 33	0 19	0 36	0 27	0 44	0 65	0 34	0 31	0 36	0 5	0 16	0 13	0 14	0 15	0 17	0 39	0 18	0 20	0 14	0 8	0 15	0 26	0 23	0 0	0 0	0 0	0 0	0 12	0 0	0 0	0 0	0 0	0 0	0 0	0 0	0 0	0 0	0 0	0 0	0 0	0 0
18	16204911	TCCCTATA	GTCCTATG	0 35	0 17	0 36	0 47	0 45	0 33	0 19	0 36	0 27	0 44	0 65	0 34	0 31	0 36	0 5	0 16	0 13	0 14	0 15	0 17	0 39	0 18	0 20	0 14	0 8	0 15	0 26	0 23	0 0	0 0	0 0	0 0	0 12	0 0	0 0	0 0	0 0	0 0	0 0	0 0	0 0	0 0	0 0	0 0	0 0	0 0
18	16204918	A	G	0 35	0 17	0 36	0 47	0 45	0 33	0 19	0 36	0 27	0 44	0 65	0 34	0 31	0 36	0 5	0 16	0 13	0 14	0 15	0 17	0 39	18 18	0 20	0 14	0 8	0 15	0 26	0 23	26 0	28 0	35 0	12 0	23 12	25 0	23 0	14 0	29 0	27 0	20 0	21 0	37 0	26 0	24 0	30 0	28 0	34 0
18	16204944	C	T	0 40	0 21	0 52	0 50	0 51	0 43	0 18	0 40	0 42	0 58	0 75	0 41	0 35	0 44	0 4	0 17	0 16	0 16	0 19	0 22	0 48	0 32	0 17	0 22	0 11	0 14	0 26	0 35	0 35	0 37	0 48	0 12	0 42	0 26	0 25	0 16	0 37	0 31	0 31	0 22	0 31	0 26	0 29	0 25	0 27	0 34
18	16204950	C	G	0 39	0 22	0 50	0 49	0 51	0 44	0 20	0 39	0 45	0 57	0 74	0 42	0 36	0 47	0 4	0 16	0 16	0 15	0 16	0 21	0 47	0 32	0 20	0 22	0 13	0 14	0 25	0 35	0 37	0 38	0 52	0 11	0 40	0 26	0 29	0 17	0 33	0 30	0 31	0 19	0 34	0 27	0 30	0 27	16 11	0 43
18	16204950	C	T	0 39	0 22	0 50	0 49	0 51	0 44	0 20	0 39	0 45	0 57	0 74	0 42	0 36	0 47	0 4	0 16	0 16	0 15	0 16	0 21	0 47	0 32	0 20	0 22	0 13	0 14	0 25	0 35	0 37	0 38	0 52	0 11	0 40	0 26	0 29	0 17	0 33	0 30	0 31	0 19	0 34	0 27	0 30	0 27	0 11	0 43
18	16204964	C	T	0 39	0 24	0 50	0 53	0 53	0 42	0 22	0 39	0 43	0 59	0 73	0 45	0 42	0 47	0 6	0 17	0 18	0 13	8 7	9 12	0 52	0 28	0 18	0 19	0 13	0 14	8 18	0 33	0 35	0 39	0 51	0 11	0 37	0 33	0 24	0 21	0 32	0 32	0 29	0 19	1 31	0 27	0 28	0 27	0 27	0 42
18	16204966	A	G	0 38	0 23	0 48	0 51	0 54	0 43	0 21	0 39	0 44	0 61	0 74	0 45	0 44	0 45	0 6	0 16	0 20	0 14	0 15	0 20	0 51	0 29	0 18	0 19	0 14	0 12	0 24	0 32	0 35	0 39	0 50	0 11	0 36	0 33	0 26	0 20	0 36	0 33	0 29	0 19	0 32	0 27	0 29	0 28	0 26	0 40
18	16204973	G	T	0 40	0 22	0 49	0 51	0 52	0 42	0 21	0 40	0 43	0 57	0 75	0 48	0 46	0 45	0 5	0 16	0 18	0 17	0 14	0 19	0 49	0 29	0 15	0 18	0 14	0 13	0 25	1 28	0 32	0 40	0 53	0 14	0 35	19 13	16 9	21 0	20 15	0 33	13 16	9 13	0 34	0 28	0 28	0 27	0 26	0 37
18	16204977	CTTC	GTTT	0 36	0 22	0 47	0 46	0 29	0 41	0 4	0 23	0 21	0 57	0 71	0 46	0 44	0 27	0 4	0 14	0 16	0 16	0 8	0 11	0 47	0 15	0 14	0 19	0 14	0 11	0 15	0 29	0 0	0 0	0 0	0 0	0 17	0 0	0 0	0 0	0 0	0 0	0 0	0 0	0 0	0 0	0 0	0 0	0 0	0 0
18	16204979	TC	AT	0 36	0 22	0 47	0 46	0 29	0 41	0 4	0 23	0 21	0 57	0 71	0 46	0 44	0 27	0 4	0 14	0 16	0 16	0 8	0 11	0 47	0 15	0 14	0 19	0 14	0 11	0 15	0 29	0 0	0 0	0 0	0 0	0 17	0 0	1 0	0 0	0 0	0 0	0 0	0 0	0 0	0 0	0 0	0 0	0 0	0 0
18	16204980	C	T	0 36	0 22	0 47	0 46	24 29	1 41	14 4	16 23	19 21	0 57	0 71	0 46	0 44	16 27	0 4	0 14	0 16	0 16	5 8	7 11	0 47	13 15	0 14	0 19	0 14	3 11	7 15	0 29	28 0	39 0	54 0	12 0	20 17	31 0	23 0	20 0	32 0	31 0	28 0	23 0	32 0	27 0	28 0	24 0	26 0	39 0
18	16204995	G	A	0 40	0 29	0 51	0 55	0 51	0 44	0 17	0 41	0 44	0 64	0 66	0 54	0 48	0 43	0 5	0 12	0 17	0 18	0 18	0 18	0 50	0 28	0 14	0 16	0 15	0 9	0 18	0 28	0 31	21 23	0 48	6 7	0 33	0 33	0 25	0 20	0 35	0 34	0 28	0 24	0 40	0 30	0 27	0 28	0 29	0 38
18	16205008	C	T	0 42	0 27	0 54	0 51	0 55	0 44	0 21	0 42	0 45	0 63	0 61	0 55	0 48	0 43	0 5	0 14	0 12	0 17	0 19	0 17	0 45	0 27	0 13	0 17	0 15	0 11	0 15	0 26	0 33	0 43	0 47	0 16	0 32	0 31	0 23	0 22	0 35	0 32	0 31	0 21	0 42	0 31	0 32	0 26	0 31	0 37
18	16205015	A	AT	0 42	0 22	0 53	0 43	0 56	0 40	0 21	0 42	0 40	0 61	0 54	0 51	0 49	0 42	0 5	0 12	0 12	0 16	0 20	0 15	0 40	0 28	0 10	0 15	0 12	0 11	0 18	0 24	15 15	18 23	27 21	5 8	13 20	30 0	21 0	21 0	36 0	31 0	25 0	23 0	37 0	29 0	30 0	26 0	30 0	33 0
18	16205021	GCT	ACTG	0 40	0 30	0 52	0 42	0 51	0 36	0 21	0 44	0 40	0 54	0 53	0 50	0 47	0 44	0 5	0 14	0 13	0 17	0 19	0 14	0 38	0 30	0 11	0 15	0 12	0 11	0 16	0 19	0 32	0 38	0 42	0 12	0 36	0 28	0 21	0 23	0 42	0 33	0 30	0 22	0 34	0 28	0 30	0 26	0 27	0 32
18	16205021	GCTGC	ACTGGCA	0 40	0 30	0 52	0 42	0 51	0 36	0 21	0 44	0 40	0 54	0 53	0 50	0 47	0 44	0 5	0 14	0 13	0 17	0 19	0 14	0 38	0 30	0 11	0 15	0 12	0 11	0 16	0 19	0 32	0 38	0 42	0 12	0 36	0 28	0 21	0 23	0 42	0 33	0 30	0 22	0 34	0 28	0 30	0 26	0 27	0 32
18	16205032	C	G	0 40	0 32	0 53	0 40	0 55	0 36	0 21	0 49	0 41	0 58	0 55	0 54	0 49	0 43	0 6	0 12	0 13	0 17	0 19	1 14	0 41	0 34	0 12	0 14	0 15	0 13	0 17	0 21	14 17	21 14	0 42	8 5	0 39	0 28	0 21	0 24	0 40	0 28	0 32	0 24	0 34	0 32	0 31	0 27	0 25	0 32
18	16205040	C	T	0 39	0 32	0 53	0 41	0 55	0 36	0 20	0 49	0 43	0 58	0 56	0 57	0 50	0 43	0 6	0 12	0 13	0 16	0 18	0 16	0 45	0 38	0 13	0 15	0 18	0 14	0 18	0 21	0 32	0 33	22 16	0 13	0 39	0 28	0 21	0 23	0 42	0 26	0 31	0 25	0 36	0 29	0 34	0 26	0 27	0 33
18	16205041	G	A	0 39	0 32	0 53	0 39	0 55	0 35	0 19	0 48	0 43	0 57	0 54	0 57	0 49	0 43	0 6	0 13	0 13	0 16	0 19	0 16	0 44	0 38	0 13	0 15	0 17	0 15	0 18	0 21	0 32	0 32	0 37	0 13	0 38	0 29	0 22	0 25	0 42	0 25	0 31	0 25	0 36	0 28	0 33	0 26	0 27	0 32
18	16205046	C	A	0 41	0 34	0 54	0 43	0 58	0 36	0 19	0 49	0 43	0 55	0 57	0 56	0 50	0 42	0 6	0 16	0 13	0 16	0 20	0 18	0 45	0 38	0 11	0 15	0 15	0 15	0 20	0 22	0 35	0 34	0 36	0 13	0 41	0 28	0 23	0 24	0 40	0 24	0 32	0 26	0 37	0 28	0 34	0 26	0 25	0 32
18	16205054	GA	AT	0 41	0 33	0 59	0 46	0 60	0 34	0 16	0 50	0 40	0 54	0 62	0 54	0 47	0 40	0 7	0 16	0 13	0 16	0 18	0 18	0 42	0 39	0 9	0 15	0 14	0 15	0 18	0 24	0 38	0 33	0 35	0 14	0 42	0 26	0 20	0 20	0 37	0 28	0 33	0 25	0 39	0 28	0 34	0 25	0 25	0 32
18	16205056	A	C	0 41	0 35	0 61	0 46	0 60	0 35	0 14	0 52	0 40	0 54	0 63	0 58	0 47	0 39	0 7	0 16	0 13	0 16	0 19	0 19	0 42	0 39	0 9	0 18	0 14	0 15	0 17	0 25	0 39	0 34	0 36	0 14	0 44	11 16	11 9	0 18	0 35	19 8	20 13	11 15	39 0	28 0	34 0	26 0	25 0	31 0
18	16205056	A	G	0 41	0 35	0 61	0 46	0 60	0 35	0 14	0 52	0 40	0 54	0 63	0 58	0 47	0 39	0 7	0 16	0 13	0 16	0 19	0 19	0 42	0 39	0 9	0 18	0 14	0 15	0 17	0 25	0 39	0 34	0 36	0 14	0 44	0 16	0 9	0 18	0 35	0 8	0 13	0 15	0 0	0 0	0 0	0 0	0 0	0 0
18	16205062	T	C	0 39	0 38	0 59	0 43	0 57	0 36	0 13	0 51	0 38	0 50	0 58	0 58	0 42	0 39	0 8	0 17	0 11	0 16	0 18	0 18	0 41	0 39	0 12	0 19	0 13	0 15	0 14	0 24	0 39	0 29	0 34	0 14	0 41	0 27	0 21	0 18	0 34	0 26	0 30	0 25	0 38	0 29	0 36	0 29	0 25	0 33
18	16205062	T	TG	0 39	0 38	0 59	0 43	0 57	0 36	0 13	0 51	0 38	0 50	0 58	0 58	0 42	0 39	0 8	0 17	0 11	0 16	0 18	0 18	0 41	0 39	0 12	0 19	0 13	0 15	0 14	0 24	0 39	0 29	0 34	0 14	0 41	0 27	0 21	0 18	0 34	0 26	0 30	0 25	0 38	0 29	0 36	0 29	0 25	0 33
18	16205068	C	T	0 41	0 40	0 60	0 43	0 59	0 40	0 15	0 52	0 33	0 51	0 55	0 61	0 42	0 38	0 8	0 17	0 10	0 16	0 18	0 17	0 43	0 43	0 10	0 21	0 12	0 16	0 16	0 26	24 19	15 15	20 15	5 9	14 30	28 0	21 0	17 0	36 0	29 0	31 0	25 0	38 0	29 0	41 0	29 0	29 0	34 0
18	16205073	G	C	0 42	0 39	0 62	0 42	0 60	0 41	0 13	0 52	0 34	0 49	0 55	0 59	0 41	0 40	0 8	0 16	0 9	0 14	0 18	0 19	0 47	0 42	0 11	0 23	0 12	0 16	0 16	0 25	0 48	0 32	0 36	0 14	0 44	0 29	0 21	0 18	0 36	0 33	0 28	0 24	0 37	0 27	0 41	0 28	0 30	0 32
18	16205079	A	T	0 39	0 38	0 60	0 41	0 58	0 43	0 13	0 52	0 34	0 49	0 60	0 61	0 44	0 39	0 9	0 16	0 9	0 14	0 17	0 22	0 48	0 45	0 12	0 23	0 12	0 16	0 16	0 27	0 47	0 33	0 34	0 15	0 44	0 30	0 20	0 18	0 39	0 35	0 26	0 24	0 39	0 32	0 43	0 34	0 33	0 29
18	16205089	T	A	0 38	0 35	0 61	0 38	0 57	0 42	0 14	0 53	0 38	0 46	0 60	0 56	0 40	0 42	0 11	0 15	0 10	0 13	0 16	0 22	0 43	0 49	0 12	0 24	0 13	0 15	0 18	0 29	22 24	16 16	18 19	10 5	0 41	0 27	0 19	0 18	0 39	0 35	0 26	0 24	0 39	0 34	0 42	0 36	0 32	0 31
18	16205092	T	C	0 39	0 34	0 65	0 35	0 57	0 41	0 13	0 53	0 40	0 43	0 61	0 56	0 39	0 43	0 10	0 14	0 10	0 13	0 17	0 21	0 43	0 49	0 13	0 24	0 12	0 15	0 18	0 30	0 45	0 31	0 40	0 12	13 30	0 26	0 20	0 17	19 20	8 23	0 26	0 23	0 37	0 32	0 38	0 35	0 31	0 28
18	16205096	T	G	0 35	0 33	0 67	0 37	0 59	0 42	0 14	0 54	0 39	0 41	0 65	0 54	0 37	0 44	0 9	0 14	0 11	0 11	0 16	0 19	0 43	0 47	0 14	0 24	0 10	0 15	0 19	0 30	0 46	0 36	0 41	0 14	0 43	0 28	0 18	0 18	0 39	0 34	0 26	0 22	0 34	0 33	0 35	0 34	0 30	0 28
18	16205097	TA	AG	0 35	0 34	0 64	0 36	0 60	0 43	0 14	0 54	0 39	0 42	0 64	0 54	0 35	0 44	0 9	0 13	0 11	0 11	0 15	0 20	0 43	0 46	0 14	0 23	0 10	0 14	0 19	0 30	0 44	0 34	0 41	0 14	0 42	0 28	0 17	0 18	0 38	0 37	0 26	0 24	0 35	0 34	0 36	0 35	0 30	0 27
18	16205098	A	C	0 35	0 34	0 64	0 36	0 60	0 43	0 14	0 54	0 39	0 42	0 64	0 54	0 35	0 44	0 9	0 13	0 11	0 11	0 15	0 20	0 43	0 46	0 14	0 23	0 10	0 14	0 19	0 30	0 44	0 34	0 41	0 14	0 42	0 28	0 17	0 18	0 38	0 37	0 26	0 24	0 35	0 34	0 36	0 35	0 30	0 27
18	16205101	AG	A	0 30	0 30	0 60	0 37	0 54	0 45	0 11	0 53	0 39	0 42	0 62	0 49	0 33	0 43	0 8	0 12	0 11	0 12	0 14	0 19	0 42	0 41	0 13	0 22	0 11	0 15	0 18	0 29	0 43	0 35	0 39	0 13	0 39	0 24	0 17	0 19	0 37	0 34	0 25	0 26	0 35	0 32	0 33	0 36	0 29	0 24
18	16205111	T	A	0 35	0 31	0 58	0 40	0 53	0 48	0 9	0 54	0 41	0 49	0 65	0 53	0 33	0 44	0 8	0 13	0 12	0 13	0 14	0 20	0 42	0 44	0 15	0 23	0 12	0 12	0 18	0 24	0 23	0 20	0 15	0 4	0 40	0 22	0 17	0 17	0 40	0 36	0 26	0 26	0 36	0 34	0 34	0 33	0 33	0 24
18	16205111	T	C	0 35	0 31	0 58	0 40	0 53	0 48	0 9	0 54	0 41	0 49	0 65	0 53	0 33	0 44	0 8	0 13	0 12	0 13	0 14	0 20	0 42	0 44	0 15	0 23	0 12	0 12	0 18	0 24	21 23	21 20	23 15	10 4	0 40	0 22	0 17	0 17	0 40	0 36	0 26	0 26	0 36	0 34	0 34	0 33	0 33	0 24
18	16205122	A	T	0 32	0 29	0 53	0 40	0 54	0 47	0 10	0 51	0 43	0 51	0 68	0 58	0 33	0 39	0 9	0 12	0 12	0 11	0 15	0 23	0 44	0 44	0 14	0 22	0 11	0 13	0 19	0 26	0 47	0 48	0 41	0 15	0 35	0 20	0 19	0 17	0 44	0 33	0 28	0 23	0 34	0 31	0 35	0 36	0 32	0 25
18	16205132	C	T	0 35	0 28	0 51	0 43	0 51	0 49	0 14	0 52	0 42	0 47	0 69	0 58	0 34	0 40	0 8	0 11	0 14	0 10	0 16	0 23	0 46	0 47	0 14	0 27	0 8	0 12	0 19	0 28	0 47	0 49	0 42	0 17	0 39	0 19	0 17	0 17	0 42	0 34	0 28	0 23	0 35	0 27	0 36	0 34	0 33	0 24
18	16205133	A	G	0 35	0 28	0 50	0 42	0 51	0 50	0 16	0 50	0 40	0 46	0 67	0 56	0 34	0 40	0 8	0 11	0 14	0 9	0 16	0 22	0 46	0 46	0 12	0 25	0 9	0 12	0 18	0 29	0 47	0 49	0 43	0 16	0 40	0 19	0 17	0 18	0 43	0 33	0 28	0 23	0 36	0 28	0 37	0 35	0 31	0 24
18	16205141	GA	AC	0 32	0 30	0 52	0 44	0 48	0 51	0 17	0 49	0 42	0 46	0 65	0 56	0 36	0 40	0 9	0 10	0 13	0 13	0 14	0 23	0 47	0 44	0 13	0 26	0 7	0 9	0 18	0 26	0 42	0 51	0 42	0 17	0 38	0 19	0 17	0 17	0 41	0 31	0 26	0 23	0 31	0 26	0 36	0 33	0 30	0 24
18	16205145	GTCGAAAAA	G	0 26	0 27	0 45	0 37	0 43	0 48	0 19	0 45	0 40	0 45	0 55	0 48	0 37	0 37	0 8	0 9	0 13	0 11	0 15	0 16	0 43	0 41	0 14	0 24	0 8	0 8	0 16	0 25	12 22	21 25	12 22	5 9	11 19	18 0	12 0	13 0	35 0	26 0	21 0	20 0	25 0	22 0	24 0	24 0	21 0	19 0
18	16205157	TG	T	0 31	0 24	0 41	0 42	0 48	0 50	0 20	0 43	0 45	0 49	0 59	0 48	0 42	0 38	0 7	0 12	0 14	0 11	0 17	0 20	0 47	0 40	0 12	0 23	0 9	0 7	0 20	0 26	25 14	26 29	0 32	9 5	0 35	0 22	0 17	0 16	0 42	0 33	0 25	0 24	0 27	0 28	0 33	0 33	0 28	0 26
18	16205165	G	C	0 32	0 28	0 43	0 46	0 51	0 53	0 19	0 47	0 47	0 55	0 62	0 50	0 45	0 41	0 7	0 13	0 16	0 13	0 22	0 21	0 48	0 38	0 14	0 26	0 8	0 11	0 18	0 31	0 41	0 57	0 34	0 15	0 37	0 22	0 17	0 18	0 43	0 33	0 24	0 24	0 30	0 29	0 34	0 32	0 27	0 28
18	16205189	A	G	0 31	0 26	0 44	0 51	0 52	0 50	0 19	0 43	0 47	0 59	0 62	0 49	0 45	0 38	0 4	0 14	0 18	0 18	0 25	0 16	0 52	0 38	0 17	0 27	0 16	0 11	0 17	0 29	0 39	0 53	0 26	0 16	0 39	0 27	0 17	0 21	0 40	0 37	0 29	0 23	0 33	0 31	0 41	0 32	0 29	0 35
18	16205202	AT	A	0 30	0 29	0 39	0 45	0 53	0 45	0 21	0 41	0 46	0 55	0 56	0 40	0 43	0 33	0 4	0 17	0 17	0 14	0 24	0 15	0 46	0 37	0 20	0 26	0 13	0 13	0 16	0 26	0 34	0 42	0 24	0 14	0 36	0 24	0 16	0 20	0 43	0 41	0 28	0 22	0 36	0 34	0 42	0 35	0 29	0 32
18	16205207	G	A	0 30	0 29	0 39	0 45	0 53	0 45	0 21	0 41	0 46	0 55	0 56	0 40	0 43	0 33	0 4	0 17	0 17	0 14	0 24	0 15	0 46	0 37	0 20	0 26	0 13	0 13	0 16	0 26	0 34	0 42	0 24	0 14	0 36	0 24	0 16	0 20	0 43	0 41	0 28	0 22	0 36	0 34	0 42	0 35	0 29	0 32
18	16205210	A	G	0 30	0 31	0 46	0 49	0 58	0 47	0 22	0 44	1 46	0 55	0 58	0 42	0 47	0 32	0 4	0 19	0 20	0 16	0 25	0 19	0 49	0 39	0 19	0 28	0 14	0 14	0 15	0 31	0 36	0 46	0 26	0 15	0 38	11 13	5 13	0 19	0 44	24 14	16 11	10 12	32 2	32 2	23 23	35 0	14 13	17 15
18	16205220	C	T	0 31	0 31	0 48	0 52	0 55	0 45	0 21	0 44	0 51	0 58	0 53	0 39	0 48	0 31	0 3	0 18	0 19	0 15	0 27	0 19	0 47	0 35	0 18	0 26	0 16	0 11	0 14	0 29	0 33	0 41	0 22	0 14	0 37	0 25	0 20	0 23	0 46	0 39	0 25	0 21	0 31	0 30	0 41	0 34	0 27	0 32
18	16205224	A	T	0 32	0 31	0 48	0 55	0 52	0 46	0 22	0 42	0 52	0 60	0 54	0 39	0 48	0 32	0 3	0 19	0 18	0 16	0 26	0 19	0 47	0 34	0 18	0 24	0 16	0 11	0 14	0 26	0 32	0 39	0 22	0 14	0 35	0 24	0 19	0 22	0 45	0 37	0 26	0 19	0 32	0 31	0 39	0 35	0 26	0 34
18	16205230	CAT	C	0 29	0 31	0 48	0 47	0 52	0 44	0 16	0 44	0 51	0 62	0 51	0 40	0 46	0 31	0 3	0 19	0 18	0 17	0 24	0 18	0 45	0 31	0 18	0 22	0 17	0 13	0 14	0 25	0 16	0 33	0 27	0 13	0 30	0 21	0 18	0 21	0 42	0 32	0 25	0 18	0 33	0 30	0 38	0 35	0 26	0 33
18	16205233	A	C	0 29	0 31	0 48	0 47	0 52	0 44	0 16	0 44	0 51	0 62	0 51	0 40	0 46	0 31	0 3	0 19	0 18	0 17	0 24	0 18	0 45	0 31	0 18	0 22	0 17	0 13	0 14	0 25	0 16	0 33	0 27	0 13	0 30	0 21	0 18	0 21	0 42	0 32	0 25	0 18	0 33	0 30	0 38	0 35	0 26	0 33
18	16205233	A	T	0 29	0 31	0 48	0 47	0 52	0 44	0 16	0 44	0 51	0 62	0 51	0 40	0 46	0 31	0 3	0 19	0 18	0 17	0 24	0 18	0 45	0 31	0 18	0 22	0 17	0 13	0 14	0 25	16 16	0 33	0 27	0 13	0 30	0 21	0 18	0 21	0 42	0 32	0 25	0 18	0 33	0 30	0 38	0 35	0 26	0 33
18	16205247	C	A	0 36	0 32	0 47	0 46	0 58	0 44	0 16	0 44	0 42	0 60	0 48	0 41	0 43	0 33	0 1	0 21	0 15	0 18	0 25	0 18	0 46	0 31	0 19	0 20	0 19	0 16	0 14	0 23	0 28	0 32	0 33	0 11	0 31	0 23	0 20	0 19	0 39	0 34	0 22	0 21	0 29	0 31	0 37	0 31	11 13	0 35
18	16205254	A	G	0 37	0 35	0 51	0 45	0 58	0 48	0 15	0 44	0 40	0 61	0 50	0 44	0 40	0 29	0 0	0 19	0 16	0 20	0 25	0 20	0 48	0 32	0 19	0 20	0 20	0 18	0 16	0 21	0 29	0 32	0 31	0 12	0 31	0 20	0 18	0 16	0 39	0 32	0 21	0 22	0 29	0 31	0 39	0 29	0 25	0 36
18	16205258	T	C	0 38	0 35	0 52	0 44	0 56	0 50	0 16	0 42	0 44	0 62	0 51	0 43	0 41	0 31	0 0	0 20	0 15	0 19	0 23	0 21	0 44	0 30	0 19	0 21	0 20	0 18	0 15	0 22	0 30	0 31	0 33	0 12	0 33	0 20	0 20	0 17	0 38	0 32	0 23	0 19	0 30	0 29	0 39	0 28	0 25	0 37
18	16205260	T	C	0 39	0 36	0 51	0 44	0 58	0 49	0 15	0 43	0 44	0 61	0 50	0 43	0 41	0 32	0 0	0 21	0 14	0 18	0 22	0 21	0 47	0 29	0 18	0 19	0 20	0 16	0 15	0 22	0 28	0 29	0 34	0 11	0 35	0 20	0 19	0 17	0 37	0 33	0 23	0 18	0 31	0 28	0 39	0 28	0 23	0 37
18	16205264	A	G	0 41	0 32	0 51	0 42	0 56	0 52	0 16	0 41	0 45	0 59	0 55	0 44	0 40	0 31	0 0	0 21	0 13	0 20	0 19	0 21	0 48	0 31	0 16	0 18	0 21	0 15	0 14	0 21	0 27	0 29	0 32	0 11	0 34	0 20	0 19	0 19	0 39	0 32	0 22	0 18	0 33	0 28	0 40	0 30	0 25	0 40
18	16205265	AACAA	GACAG	0 39	0 33	0 48	0 38	0 52	0 51	0 16	0 39	0 41	0 56	0 53	0 41	0 39	0 28	0 0	0 21	0 11	0 17	0 20	0 21	0 45	0 28	0 17	0 16	0 20	0 16	0 14	0 21	0 28	0 28	0 32	0 11	0 35	0 22	0 19	0 19	0 35	0 30	0 20	0 17	0 32	0 29	0 38	0 30	0 20	0 38
18	16205272	C	T	0 42	0 34	0 52	0 41	0 53	0 52	0 19	0 40	0 43	0 56	0 57	0 45	0 40	0 32	0 0	0 22	0 12	0 17	0 19	0 23	0 48	0 26	0 17	0 15	0 20	0 17	0 16	0 23	0 29	0 33	0 35	0 10	0 38	0 23	0 20	0 19	0 36	0 30	0 20	0 17	0 34	0 28	0 41	0 33	0 20	0 41
18	16205284	AATA	GATC	0 39	0 35	0 48	0 44	0 47	0 47	0 15	0 43	0 37	0 52	0 51	0 49	0 35	0 29	0 1	0 20	0 11	0 14	0 15	0 24	0 45	0 26	0 13	0 12	0 13	0 19	0 13	0 26	0 29	0 29	0 42	0 8	0 34	0 23	0 19	0 19	0 34	0 30	0 18	0 15	0 35	0 33	0 41	0 33	0 21	0 41
18	16205284	AATATCT	GATCTCC	0 39	0 35	0 48	0 44	0 47	0 47	0 15	0 43	0 37	0 52	0 51	0 49	0 35	0 29	0 1	0 20	0 11	0 14	0 15	0 24	0 45	0 26	0 13	0 12	0 13	0 19	0 13	0 26	0 29	0 29	0 42	0 8	0 34	0 23	0 19	0 19	0 34	0 30	0 18	0 15	0 35	0 33	0 41	0 33	0 21	0 41
18	16205291	G	GA	0 40	0 31	0 48	0 44	0 26	0 44	0 5	0 28	0 15	0 23	0 27	0 22	0 32	0 0	0 1	0 4	0 10	0 14	0 7	0 13	0 45	0 30	0 10	0 9	0 14	0 10	0 12	0 25	0 27	13 12	0 41	2 7	0 33	0 20	0 20	0 17	0 33	0 30	0 20	0 15	0 34	0 33	0 42	0 34	0 22	0 43
18	16205292	A	AT	0 40	0 31	0 48	0 44	0 26	0 44	0 5	0 28	0 15	24 23	24 27	25 22	0 32	15 0	1 1	11 4	0 10	0 14	0 7	0 13	0 45	0 30	0 10	0 9	0 14	0 10	0 12	0 25	0 27	0 12	0 41	0 7	0 33	0 20	0 20	0 17	0 33	0 30	0 20	0 15	0 34	0 33	0 42	0 34	0 22	0 43
18	16205298	GT	TA	0 40	0 31	0 48	0 44	20 26	0 44	8 5	0 28	0 15	0 23	0 27	0 22	0 32	0 0	0 1	0 4	0 10	0 14	0 7	0 13	0 45	0 30	0 10	0 9	0 14	0 10	0 12	0 25	0 27	0 12	0 41	0 7	0 33	0 20	0 20	0 17	0 33	0 30	0 20	0 15	0 34	0 33	0 42	0 34	0 22	0 43
18	16205299	T	A	0 40	0 31	0 48	0 44	0 26	0 44	0 5	12 28	17 15	0 23	0 27	0 22	0 32	17 0	0 1	0 4	0 10	0 14	7 7	10 13	0 45	0 30	0 10	0 9	0 14	8 10	0 12	0 25	0 27	0 12	0 41	0 7	0 33	0 20	0 20	0 17	0 33	0 30	0 20	0 15	0 34	0 33	0 42	0 34	0 22	0 43
18	16205302	A	G	0 43	0 36	0 57	0 48	0 53	0 47	0 16	0 40	0 37	0 54	0 54	0 55	0 34	0 35	0 2	0 18	0 11	0 17	0 14	0 25	0 53	0 32	0 11	0 9	0 14	0 20	0 13	0 27	14 16	1 33	0 46	0 9	0 37	0 22	0 20	0 17	0 35	0 33	0 22	0 17	0 35	0 34	0 40	0 38	0 24	0 44
18	16205310	C	A	0 46	0 36	0 54	0 47	0 54	0 46	0 17	0 42	0 35	0 56	0 56	0 55	0 36	0 36	0 2	0 17	0 10	0 15	0 14	0 23	0 48	0 27	0 11	0 9	0 14	0 17	0 14	0 27	17 19	18 21	0 45	8 2	0 38	0 20	0 22	0 17	0 32	0 36	0 21	0 15	0 35	0 36	0 41	0 37	0 22	0 46
18	16205315	T	G	0 49	0 35	0 55	0 48	0 52	0 48	0 17	0 44	0 33	0 54	0 58	0 58	0 37	0 35	0 3	0 17	0 10	0 15	0 13	0 20	0 48	0 26	0 11	0 8	0 13	0 21	0 15	0 28	0 37	0 38	0 51	0 10	0 39	0 20	0 22	0 18	0 32	0 41	0 21	0 15	0 36	0 37	0 41	0 41	0 23	0 44
18	16205318	A	G	0 46	0 33	0 55	0 47	0 51	0 50	0 17	0 43	0 33	0 53	0 58	0 58	0 38	0 36	0 4	0 18	0 10	0 14	0 15	0 20	0 49	0 27	0 11	0 9	0 12	0 20	0 14	0 30	0 36	0 40	0 51	0 10	0 41	10 9	8 12	0 17	0 32	23 19	13 8	6 8	35 0	35 0	37 2	36 2	11 12	42 0
18	16205322	C	T	0 47	0 34	0 55	0 47	0 53	0 52	0 16	0 42	0 33	0 51	0 56	0 58	0 36	0 37	0 5	0 16	0 10	0 13	0 12	0 18	0 47	0 28	0 11	0 9	0 11	0 20	0 14	0 29	0 35	0 37	0 53	0 10	0 41	0 17	0 21	0 15	0 34	0 40	0 19	0 14	0 35	0 36	0 39	0 42	0 22	0 41
18	16205328	T	C	0 48	0 36	0 55	0 46	0 53	0 52	0 17	0 39	0 32	0 49	0 55	0 61	0 38	0 37	0 6	0 17	0 11	0 14	0 14	0 18	0 48	0 29	0 10	0 11	0 10	0 18	0 14	0 28	0 39	1 38	0 53	0 11	0 39	0 20	0 18	0 17	0 31	0 38	0 15	0 15	0 35	0 35	0 36	0 40	0 19	0 45
18	16205333	T	C	20 26	24 10	26 27	0 43	0 49	28 22	0 15	19 18	11 20	23 24	0 53	27 27	0 37	0 33	3 3	3 12	0 10	0 13	0 12	0 15	21 21	0 28	0 8	0 10	0 8	0 16	9 4	13 12	0 40	0 36	0 51	0 10	24 16	0 21	0 20	0 16	0 33	0 36	0 14	0 17	0 38	0 36	0 35	0 40	0 21	0 47
18	16205341	TCCAGGATCAAC	T	0 39	0 24	0 47	0 41	0 43	0 41	0 16	0 39	0 31	0 42	0 46	0 47	0 36	0 32	0 6	0 14	0 10	0 8	0 11	0 15	0 41	0 29	0 10	0 12	0 10	0 12	0 8	0 23	0 40	0 35	0 48	0 8	0 36	0 21	0 18	0 16	0 27	0 34	0 14	0 17	0 33	0 34	0 33	0 37	0 17	0 45
18	16205362	A	G	0 42	0 32	0 56	0 45	0 48	0 43	0 20	0 44	0 37	0 48	0 49	0 49	0 41	0 37	0 6	0 14	0 11	0 10	0 11	0 16	0 46	0 36	0 13	0 16	0 16	0 14	0 13	0 29	0 44	0 40	0 56	0 8	0 40	0 25	0 19	0 17	0 35	0 43	0 15	0 20	0 38	0 37	0 32	0 42	0 17	0 50
18	16205383	T	C	0 39	0 33	0 54	0 43	0 49	0 38	0 18	0 45	0 42	0 47	0 49	0 48	0 42	0 41	0 6	0 17	0 14	0 10	0 16	0 13	0 43	0 34	0 11	0 19	0 14	0 14	0 12	0 23	0 47	0 41	0 49	0 10	0 40	16 11	8 9	0 15	0 34	23 14	10 9	10 12	40 0	35 0	28 0	40 0	6 9	24 28
18	16205393	A	T	0 36	0 36	0 60	0 44	21 28	19 21	0 19	0 47	0 37	0 49	0 46	0 41	0 38	0 41	0 5	0 16	9 6	7 6	0 18	0 15	0 42	0 31	0 10	0 21	0 13	0 13	0 12	0 24	0 46	0 37	0 48	0 8	0 40	0 23	0 18	0 19	0 36	0 39	0 22	0 19	0 41	0 33	0 28	0 36	0 19	0 50
18	16205394	G	A	0 37	0 36	0 60	0 45	0 49	0 39	0 19	0 47	0 39	0 49	0 46	0 41	0 40	0 39	0 5	0 16	0 15	0 14	0 18	0 17	0 43	0 31	0 11	0 20	0 13	0 13	0 12	0 24	0 46	0 37	0 47	0 7	0 39	0 25	0 17	0 18	0 34	0 39	0 23	0 18	0 40	0 33	0 27	0 36	0 18	0 50
18	16205423	A	AAAACAAT	0 28	0 45	0 54	0 43	0 59	0 44	0 21	0 46	0 35	0 49	0 50	0 38	0 44	0 39	0 1	0 15	0 14	0 18	0 20	0 19	0 42	0 38	0 14	0 22	0 15	0 13	0 12	0 28	0 32	0 27	0 34	0 7	0 36	0 28	0 18	0 20	0 38	0 42	0 21	0 26	0 32	0 35	0 25	0 34	0 18	0 41
18	16205425	C	AACAATACA	0 28	0 45	0 54	0 43	0 59	0 44	0 21	0 46	0 35	0 49	0 50	0 38	0 44	0 39	0 1	0 15	0 14	0 18	0 20	0 19	0 42	0 38	0 14	0 22	0 15	0 13	0 12	0 28	0 32	0 27	0 34	0 7	0 36	0 28	0 18	0 20	0 38	0 42	0 21	0 26	0 32	0 35	0 25	0 34	0 18	0 41
18	16205426	A	G	0 28	0 47	0 55	0 45	0 62	0 43	0 21	0 48	0 37	0 50	0 49	0 39	0 46	0 41	0 1	0 15	0 14	0 18	0 21	0 18	0 44	0 37	0 16	0 22	0 15	0 13	0 11	0 29	0 35	0 27	0 35	0 7	14 22	0 29	0 16	0 20	0 37	0 42	0 19	0 25	0 34	0 34	0 26	0 35	0 20	0 40
18	16205434	C	G	0 24	0 45	0 58	0 47	0 67	0 45	0 23	0 46	0 43	0 53	0 54	0 34	0 48	0 40	0 1	0 16	0 15	0 17	0 24	0 20	0 47	23 20	0 17	0 22	0 14	0 15	0 12	0 27	0 35	0 27	0 32	0 7	0 40	0 28	0 18	0 21	0 36	0 42	0 23	0 26	0 33	0 30	0 27	0 35	0 19	0 40
18	16205449	T	C	0 22	0 46	0 53	0 42	0 67	0 47	0 19	0 38	0 38	0 52	0 58	0 27	0 44	0 38	0 1	0 16	0 13	0 17	0 26	0 22	0 41	0 42	0 17	0 18	0 8	0 12	0 9	0 24	0 41	0 20	0 29	0 6	16 23	29 0	19 0	21 0	36 0	37 0	21 0	25 0	37 0	30 0	25 0	28 0	21 0	41 0
18	16205461	ACT	A	0 24	0 48	0 52	0 47	0 66	0 49	0 20	0 34	0 44	0 48	0 56	0 33	0 47	0 40	0 2	0 17	0 15	0 17	0 25	0 22	0 37	0 42	6 10	5 9	1 4	5 8	3 6	13 13	0 39	0 22	0 32	0 6	0 33	0 30	0 18	0 23	0 44	0 33	0 22	0 27	0 38	0 28	0 26	0 33	0 22	0 44
18	16205465	T	C	0 24	0 48	0 54	1 48	0 67	0 50	0 21	0 39	0 43	0 51	0 58	0 33	0 50	0 41	0 2	0 18	0 16	0 18	0 27	0 24	0 41	0 43	0 14	0 14	0 6	0 12	0 9	0 27	0 40	11 11	0 33	0 5	0 32	0 31	0 19	0 21	0 44	0 31	0 19	0 24	0 38	0 28	0 26	0 35	0 25	0 44
18	16205473	G	C	0 22	0 49	0 52	0 52	0 69	0 51	0 22	0 34	0 44	0 49	0 56	0 35	0 53	0 42	0 3	0 19	0 14	0 21	0 23	0 25	0 48	0 43	0 14	0 14	0 7	0 13	0 10	0 29	0 36	0 24	0 34	0 5	0 33	0 32	0 21	0 25	0 41	0 32	0 22	0 27	0 41	0 29	0 25	0 33	0 24	0 46
18	16205488	T	C	0 22	0 47	0 50	0 53	0 59	0 52	0 24	0 40	0 39	0 49	0 60	0 38	0 49	0 36	0 4	0 19	0 13	0 21	0 23	0 23	0 47	0 43	0 13	0 13	0 8	0 15	0 9	0 28	0 34	0 26	0 39	0 5	0 33	0 31	0 19	0 21	0 44	0 31	0 23	0 24	0 38	0 23	0 25	0 36	0 28	0 43
18	16205498	A	G	0 23	0 45	0 49	0 48	0 52	0 54	0 22	0 40	0 35	0 49	0 63	0 36	0 50	0 29	0 4	0 18	0 14	0 19	0 21	0 21	0 51	0 42	0 13	0 12	0 10	0 14	0 9	0 29	0 35	14 16	0 37	3 2	0 32	0 34	0 21	0 23	0 39	0 31	0 24	0 26	0 38	0 27	0 23	0 33	0 31	0 39
18	16205501	G	T	0 21	0 46	0 50	0 47	0 50	0 51	0 21	0 41	0 34	0 45	0 60	0 35	0 47	0 29	0 5	0 18	0 14	0 17	0 21	0 20	0 51	0 43	0 14	0 14	0 11	0 14	0 9	0 29	0 35	0 31	0 37	0 5	0 31	0 34	0 23	0 23	0 39	0 30	0 26	0 25	0 39	0 25	0 22	0 35	0 32	0 40
18	16205502	T	C	0 22	0 43	0 49	0 44	0 50	0 50	0 21	0 41	0 33	0 42	0 57	0 34	0 45	0 28	0 5	0 18	0 14	0 17	0 21	0 20	0 50	0 41	0 14	0 12	0 10	0 13	0 8	0 29	0 35	1 30	0 37	0 5	0 27	13 21	12 10	23 0	14 24	0 29	14 12	12 14	0 40	0 26	0 23	0 35	0 30	0 38
18	16205506	T	A	0 27	0 40	0 52	0 48	0 47	0 52	0 21	0 41	0 33	0 39	0 56	0 36	0 47	0 29	0 5	0 19	0 11	0 16	0 20	0 20	0 53	0 40	0 14	0 12	0 12	0 14	0 8	0 23	0 18	0 13	0 13	0 3	0 31	0 31	0 20	0 24	0 35	0 29	0 26	0 22	0 39	0 27	0 21	0 33	0 32	0 39
18	16205506	T	C	0 27	0 40	0 52	0 48	0 47	0 52	0 21	0 41	0 33	0 39	0 56	0 36	0 47	0 29	0 5	0 19	0 11	0 16	0 20	0 20	0 53	0 40	0 14	0 12	0 12	0 14	0 8	0 23	17 18	17 13	25 13	2 3	0 31	0 31	0 20	0 24	0 35	0 29	0 26	0 22	0 39	0 27	0 21	0 33	0 32	0 39
18	16205511	GCT	ACC	0 27	0 40	0 54	0 47	0 42	0 54	0 23	0 39	0 31	0 37	0 56	0 39	0 44	0 29	0 5	0 19	0 13	0 17	0 20	0 17	0 50	0 36	0 13	0 12	0 14	0 16	0 10	0 26	0 36	0 31	0 35	0 5	0 28	0 31	0 20	0 25	0 36	0 26	0 24	0 24	0 38	0 28	0 24	0 32	0 33	0 39
18	16205530	A	T	0 31	0 37	0 52	0 44	0 37	0 54	0 16	0 46	0 31	0 39	0 57	0 36	0 45	0 25	0 5	0 19	0 15	0 17	0 15	0 18	0 49	0 35	0 11	0 12	0 14	0 20	0 12	0 29	0 33	0 35	0 37	0 6	0 30	0 28	0 18	0 24	0 37	0 27	0 22	0 20	0 35	0 29	0 26	0 29	0 30	0 34
18	16205537	G	T	0 33	0 38	0 50	0 45	0 35	0 52	0 16	0 45	0 30	0 39	0 54	0 37	0 45	0 24	0 5	0 22	0 14	0 18	0 14	0 17	0 46	0 32	0 11	0 11	0 15	0 19	1 12	0 29	0 31	0 39	0 36	0 6	0 27	0 30	0 18	0 22	0 38	0 26	0 21	0 23	0 35	0 30	0 27	0 30	0 27	0 37
18	16205547	CA	C	0 24	0 31	0 43	0 34	0 34	0 44	0 15	0 42	0 26	0 33	0 44	0 33	0 36	0 17	0 5	0 18	0 11	0 17	0 11	0 12	0 54	0 22	0 8	0 11	0 15	0 17	0 13	0 21	0 30	0 32	0 31	0 6	0 19	0 26	0 13	0 18	0 34	0 25	0 19	0 16	0 32	0 29	0 25	0 29	0 25	0 36
18	16205581	T	C	0 34	0 34	0 41	0 33	0 41	0 45	0 12	0 45	0 32	0 47	0 54	0 38	0 39	0 19	0 4	0 20	0 19	0 14	0 13	0 12	0 44	0 19	0 13	0 18	0 15	0 16	0 14	0 17	0 37	0 33	0 25	0 7	0 28	0 40	0 15	0 24	0 34	0 23	0 23	0 21	0 34	0 31	0 19	0 24	0 24	0 34
18	16205585	C	T	0 33	0 34	0 37	0 32	0 38	0 43	0 10	0 42	0 29	0 49	0 51	0 36	0 39	0 18	0 2	0 18	0 17	0 13	0 13	0 11	0 43	0 19	0 13	0 18	0 15	0 16	0 12	0 17	0 33	0 32	0 26	0 7	12 14	15 0	6 0	27 0	32 0	25 0	11 0	12 0	35 0	28 0	17 0	24 0	24 0	31 0
18	16205585	CCCC	TCCA	0 33	0 34	0 37	0 32	0 38	0 43	0 10	0 42	0 29	0 49	0 51	0 36	0 39	0 18	0 2	0 18	0 17	0 13	0 13	0 11	0 43	0 19	0 13	0 18	0 15	0 16	0 12	0 17	0 33	0 32	0 26	0 7	0 14	22 0	6 0	0 0	1 0	0 0	10 0	9 0	0 0	0 0	0 0	0 0	0 0	0 0
18	16205592	C	A	0 35	0 31	0 37	0 34	0 38	0 45	0 9	0 44	0 30	0 52	0 54	0 38	0 39	0 23	0 3	0 20	0 17	0 14	0 12	0 11	0 45	0 18	0 13	0 18	0 14	0 17	0 11	0 17	0 36	0 35	0 27	0 6	0 28	0 37	0 12	0 26	0 34	0 28	0 22	0 21	0 33	0 29	0 19	0 25	0 24	0 31
18	16205596	C	CTTG	0 26	0 29	0 24	0 29	0 36	0 38	0 7	0 38	0 25	0 50	0 47	0 32	0 32	0 23	0 3	0 17	0 14	0 11	0 11	0 9	0 36	0 15	0 12	0 13	0 8	0 14	0 9	0 17	0 30	20 7	0 20	5 0	0 23	0 37	0 11	0 23	0 28	0 27	0 20	0 18	0 28	0 26	0 19	0 19	0 21	0 25
18	16205630	T	A	0 23	0 30	0 31	0 31	0 36	0 37	0 8	0 34	0 27	0 48	0 46	0 33	0 34	0 22	0 4	0 17	0 16	0 10	0 15	0 13	0 36	0 15	0 13	0 15	0 11	0 9	0 11	0 15	0 31	0 29	0 24	0 7	0 24	0 43	0 14	0 26	0 27	0 28	0 28	0 23	0 28	0 31	0 24	0 25	0 25	0 24
18	16205647	TTCC	T	0 13	0 18	0 31	0 25	0 12	0 25	0 3	0 10	0 10	0 22	0 21	0 0	0 25	0 13	0 2	0 4	0 12	0 11	0 14	0 8	1 24	1 14	0 5	0 9	0 9	0 6	0 7	0 14	19 0	21 0	11 0	8 2	8 9	34 0	12 0	22 0	19 0	18 0	22 0	20 0	21 0	16 0	14 0	17 0	17 0	18 0
18	16205647	T	TTCC	0 13	0 18	0 31	0 25	11 12	0 25	2 3	9 10	8 10	0 22	0 21	0 0	0 25	0 13	0 2	0 4	0 12	0 11	0 14	0 8	0 24	0 14	0 5	0 9	0 9	0 6	0 7	0 14	0 0	0 0	0 0	0 2	0 9	0 0	0 0	0 0	0 0	0 0	0 0	0 0	0 0	0 0	0 0	0 0	0 0	0 0
18	16205654	TCCT	C	0 13	0 18	0 31	0 25	0 12	0 25	0 3	0 10	0 10	0 22	0 21	0 0	0 25	0 13	0 2	0 4	0 12	0 11	0 14	0 8	0 24	0 14	0 5	0 9	0 9	0 6	0 7	0 14	0 0	0 0	1 0	0 2	0 9	0 0	0 0	0 0	0 0	0 0	0 0	0 0	0 0	0 0	0 0	0 0	0 0	0 0
18	16205667	GG	CC	0 13	0 18	0 31	0 25	0 12	0 25	0 3	0 10	0 10	0 22	0 21	15 0	0 25	0 13	0 2	0 4	0 12	0 11	0 14	0 8	0 24	0 14	0 5	0 9	0 9	0 6	0 7	0 14	0 0	0 0	0 0	0 2	0 9	0 0	0 0	0 0	0 0	0 0	0 0	0 0	0 0	0 0	0 0	0 0	0 0	0 0
18	16205669	T	A	0 18	0 27	0 45	0 37	0 34	0 33	0 11	0 26	0 36	0 30	0 24	0 18	0 36	0 16	0 2	0 4	0 15	0 13	0 20	0 11	0 39	0 23	0 6	0 13	0 11	0 12	0 9	0 19	0 24	0 29	0 22	0 9	0 20	0 38	0 16	0 25	0 25	0 24	0 27	0 25	0 30	0 25	0 17	0 22	0 23	0 26
18	16205673	G	A	0 18	0 29	0 44	0 39	0 34	0 37	0 13	0 24	0 37	0 29	0 23	0 19	0 32	0 15	0 2	0 4	0 15	0 15	0 22	0 12	0 38	0 24	0 6	0 13	0 10	0 12	0 11	0 19	0 24	0 29	0 24	0 11	0 21	0 37	0 15	0 25	0 26	0 26	0 27	0 26	0 31	0 26	0 18	0 23	0 26	0 27
18	16205675	A	C	0 18	0 27	0 43	0 38	0 36	0 36	0 13	0 24	0 37	0 30	0 23	0 18	0 31	0 16	0 2	0 3	0 15	0 16	0 22	0 10	0 38	0 24	0 6	0 11	0 10	0 12	0 11	0 18	0 24	0 29	0 26	0 9	0 21	0 37	0 13	0 24	0 26	0 26	0 27	0 24	0 30	0 26	0 17	0 23	0 26	0 27
18	16205690	C	T	0 16	0 29	0 50	0 42	0 40	0 35	0 14	0 28	0 39	0 28	0 24	0 18	0 37	0 16	0 1	0 4	0 18	0 18	0 23	0 9	0 38	0 26	0 9	0 12	0 10	0 10	0 11	0 15	0 28	0 29	0 30	0 10	0 26	0 38	0 18	0 26	0 25	0 29	0 27	0 28	0 30	0 24	0 19	0 24	0 26	0 28
18	16205709	G	C	0 24	0 33	0 45	0 45	22 23	0 37	0 19	0 32	0 35	0 29	0 23	0 17	0 37	0 16	0 1	0 4	0 18	0 16	0 22	0 8	0 45	0 27	0 14	0 11	0 12	0 11	0 10	0 19	0 27	0 33	0 37	0 11	0 26	0 42	0 18	0 26	0 21	0 32	0 28	0 29	0 34	0 21	0 19	0 25	0 29	0 32
18	16205709	G	T	0 24	0 33	0 45	0 45	0 23	0 37	0 19	0 32	0 35	0 29	0 23	0 17	0 37	0 16	0 1	0 4	0 18	0 16	0 22	0 8	0 45	0 27	0 14	0 11	0 12	0 11	0 10	0 19	0 27	0 33	0 37	0 11	0 26	0 42	0 18	0 26	0 21	0 32	0 28	0 29	0 34	0 21	0 19	0 25	0 29	0 32
18	16205714	T	A	0 23	0 31	0 47	0 48	0 45	0 36	0 19	0 30	0 34	0 28	0 21	0 15	0 41	0 17	0 1	0 5	0 17	0 14	0 19	0 8	0 44	0 25	0 15	0 11	0 12	0 13	0 9	0 21	0 27	0 30	0 35	0 11	0 27	0 38	0 19	0 24	0 22	0 32	0 29	0 28	0 36	0 20	0 19	0 27	0 27	0 32
18	16205714	TT	AG	0 23	0 31	0 47	0 48	0 45	0 36	0 19	0 30	0 34	0 28	0 21	0 15	0 41	0 17	0 1	0 5	0 17	0 14	0 19	0 8	0 44	0 25	0 15	0 11	0 12	0 13	0 9	0 21	0 27	0 30	0 35	0 11	0 27	0 38	0 19	0 24	0 22	0 32	0 29	0 28	0 36	0 20	0 19	0 27	0 27	0 32
18	16205737	AGC	GT	0 25	0 30	0 46	0 44	0 46	0 40	0 18	0 32	0 34	0 25	0 19	0 16	0 39	0 13	0 2	0 5	0 17	0 15	0 13	0 9	0 41	0 27	0 15	0 8	0 12	0 19	0 11	0 19	0 27	0 30	0 37	0 8	0 25	0 35	0 18	0 18	0 23	0 30	0 29	0 30	0 36	0 21	0 21	0 25	0 32	0 39
18	16205739	C	T	0 25	0 30	0 46	0 44	0 46	0 40	0 18	0 32	0 34	0 25	0 19	0 16	0 39	0 13	0 2	0 5	0 17	0 15	0 13	0 9	0 41	0 27	0 15	0 8	0 12	0 19	0 11	0 19	0 27	0 30	0 37	0 8	0 25	0 35	0 18	0 18	0 23	0 30	0 29	0 30	0 36	0 21	0 21	0 25	0 32	0 39
18	16205740	TAG	T	0 25	0 25	0 37	0 42	0 45	0 37	0 17	0 31	0 27	0 25	0 18	0 17	0 37	0 13	0 3	0 5	0 14	0 13	0 10	0 10	0 35	0 23	0 15	0 8	0 13	0 19	0 12	0 18	0 25	0 29	0 37	0 8	9 14	0 31	0 17	0 16	12 8	19 8	0 30	0 32	0 33	0 21	0 19	0 25	0 31	16 20
18	16205744	G	T	0 25	0 25	0 37	0 42	0 45	0 37	0 17	0 31	0 27	0 25	0 18	0 17	0 37	0 13	0 3	0 5	0 14	0 13	0 10	0 10	0 35	0 23	0 15	0 8	0 13	0 19	0 12	0 18	0 25	0 29	0 37	0 8	0 14	0 31	0 17	0 16	0 8	0 8	0 30	0 32	0 33	0 21	0 19	0 25	0 31	0 20
18	16205745	A	G	0 25	0 25	0 37	0 42	0 45	0 37	0 17	0 31	0 27	0 25	0 18	0 17	0 37	0 13	0 3	0 5	0 14	0 13	0 10	0 10	0 35	0 23	0 15	0 8	0 13	0 19	0 12	0 18	0 25	0 29	0 37	0 8	0 14	1 31	0 17	0 16	0 8	0 8	0 30	0 32	0 33	0 21	0 19	0 25	0 31	0 20
18	16205755	G	A	0 26	0 31	0 41	0 39	0 49	0 38	0 16	0 38	0 30	0 25	0 21	0 18	0 42	0 17	0 4	0 5	0 15	0 13	0 10	0 9	0 37	0 24	0 16	0 12	0 15	0 20	0 14	0 17	0 29	0 30	0 39	0 8	0 23	0 31	0 15	0 18	0 25	0 29	0 33	0 32	0 31	0 20	0 17	0 22	0 34	0 40
18	16205763	TGA	T	0 25	0 24	0 38	0 37	0 46	0 36	0 14	0 36	0 29	0 21	0 21	0 16	0 42	0 16	0 3	0 5	0 12	0 11	0 8	0 9	0 33	0 23	0 15	0 12	0 14	0 18	0 12	0 16	0 10	0 31	0 30	0 8	0 23	0 28	0 13	0 17	0 22	0 27	0 10	0 29	0 32	0 19	0 17	0 19	0 30	0 38
18	16205765	A	T	0 25	0 24	0 38	0 37	0 46	0 36	0 14	0 36	0 29	0 21	0 21	0 16	0 42	0 16	0 3	0 5	0 12	0 11	0 8	0 9	0 33	0 23	0 15	0 12	0 14	0 18	0 12	0 16	21 10	0 31	0 30	0 8	0 23	0 28	0 13	0 17	0 22	0 27	0 10	0 29	0 32	0 19	0 17	0 19	0 30	0 38
18	16205765	AGT	TGA	0 25	0 24	0 38	0 37	0 46	0 36	0 14	0 36	0 29	0 21	0 21	0 16	0 42	0 16	0 3	0 5	0 12	0 11	0 8	0 9	0 33	0 23	0 15	0 12	0 14	0 18	0 12	0 16	0 10	0 31	0 30	0 8	0 23	0 28	0 13	0 17	0 22	0 27	0 10	0 29	0 32	0 19	0 17	0 19	0 30	0 38
18	16205766	GTTGA	G	0 25	0 24	0 38	0 37	0 46	0 36	0 14	0 36	0 29	0 21	0 21	0 16	0 42	0 16	0 3	0 5	0 12	0 11	0 8	0 9	0 33	0 23	0 15	0 12	0 14	0 18	0 12	0 16	0 10	0 31	0 30	0 8	0 23	0 28	0 13	0 17	0 22	0 27	0 10	0 29	0 32	0 19	0 17	0 19	0 30	0 38
18	16205767	T	G	0 25	0 24	0 38	0 37	0 46	0 36	0 14	0 36	0 29	0 21	0 21	0 16	0 42	0 16	0 3	0 5	0 12	0 11	0 8	0 9	0 33	0 23	0 15	0 12	0 14	0 18	0 12	0 16	0 10	0 31	0 30	0 8	0 23	0 28	0 13	0 17	0 22	0 27	18 10	0 29	0 32	0 19	0 17	0 19	0 30	0 38
18	16205778	G	T	0 26	0 28	0 42	0 44	0 46	0 38	0 14	0 36	0 34	0 20	0 24	0 19	0 46	0 16	0 4	0 7	0 15	0 15	0 11	0 9	0 38	0 25	0 14	0 12	0 18	0 22	0 12	0 15	22 11	0 33	0 35	0 7	0 23	0 31	0 18	0 18	0 25	0 30	0 31	0 31	0 38	0 19	0 19	0 20	0 32	0 43
18	16205781	G	T	0 27	0 27	22 18	0 43	1 46	0 40	0 13	0 36	0 35	19 0	0 24	0 20	0 47	0 17	0 4	0 8	0 15	0 16	0 12	0 9	0 35	0 25	0 15	0 12	0 19	0 25	0 13	0 14	0 32	0 33	0 35	0 7	0 21	0 31	0 17	0 19	0 25	0 30	0 32	0 30	0 38	0 19	0 19	0 21	0 30	0 43
18	16205784	A	G	0 27	0 30	0 38	0 44	0 47	0 44	0 13	0 33	0 33	0 19	0 25	0 19	0 47	0 17	0 4	0 8	0 16	0 14	0 14	0 9	0 36	0 25	0 14	0 13	0 19	0 25	0 13	0 13	0 31	0 32	0 36	0 7	0 18	0 31	0 19	0 20	0 25	0 31	0 30	0 29	0 37	0 20	0 17	0 22	0 31	0 42
18	16205785	G	T	0 27	0 29	0 37	0 43	0 46	0 44	0 13	0 34	0 32	0 19	0 25	0 20	0 48	0 17	0 4	0 8	0 16	0 14	0 14	0 8	0 36	0 23	0 14	0 13	0 19	0 25	0 13	0 13	21 10	0 32	0 36	0 7	0 18	0 31	0 18	0 19	0 25	0 31	0 31	0 29	0 37	0 19	0 17	0 21	0 32	0 43
18	16205790	G	A	0 25	0 28	0 37	0 42	0 41	0 43	0 12	0 36	0 28	0 19	0 27	0 20	0 47	0 16	0 4	0 8	0 14	0 13	0 14	0 10	0 38	0 22	0 13	0 13	0 19	0 27	0 13	0 12	0 32	0 30	0 35	0 4	0 17	0 30	0 19	0 14	0 25	0 34	0 28	0 27	0 37	0 20	0 17	0 21	0 32	0 43
18	16205795	G	T	0 27	0 28	0 38	0 41	0 38	0 45	0 13	0 34	0 30	0 17	0 28	0 19	0 46	0 15	0 4	0 9	0 15	0 13	0 15	0 11	0 39	0 21	0 14	0 16	0 19	0 27	0 13	0 12	0 31	0 30	0 33	0 4	0 17	0 29	0 18	0 15	0 25	0 34	0 30	0 28	0 38	0 20	0 16	0 21	0 32	0 45
18	16205804	T	G	0 21	0 24	0 29	0 33	0 26	0 27	0 6	0 26	0 21	0 11	0 23	0 16	0 36	0 9	0 3	0 7	0 10	0 11	0 15	0 8	0 31	0 19	0 8	0 14	0 11	0 20	0 10	0 8	0 8	0 23	0 27	0 6	0 8	0 0	0 0	0 0	0 0	0 0	0 0	0 0	0 0	0 0	0 0	0 0	0 0	0 0
18	16205804	TTTTTTTATTTTTATATA	GTTTTTTATTTTTATAT	0 21	0 24	0 29	0 33	0 26	0 27	0 6	0 26	0 21	0 11	0 23	0 16	0 36	0 9	0 3	0 7	0 10	0 11	0 15	0 8	0 31	0 19	0 8	0 14	0 11	0 20	0 10	0 8	0 8	0 23	0 27	0 6	0 8	0 0	0 0	0 0	0 0	0 0	0 0	0 0	0 0	0 0	0 0	0 0	0 0	0 0
18	16205805	TTTTTTATTTTTATATA	ATTTTTATTTTTATATG	0 21	0 24	0 29	0 33	0 26	0 27	0 6	0 26	0 21	0 11	0 23	0 16	0 36	0 9	0 3	0 7	0 10	0 11	0 15	0 8	0 31	0 19	0 8	0 14	0 11	0 20	0 10	0 8	0 8	0 23	0 27	0 6	0 8	0 0	0 0	0 0	0 0	0 0	0 0	0 0	0 0	0 0	0 0	0 0	0 0	0 0
18	16205806	T	C	0 21	0 24	0 29	0 33	0 26	0 27	0 6	0 26	0 21	0 11	0 23	0 16	0 36	0 9	0 3	0 7	0 10	0 11	0 15	0 8	0 31	0 19	0 8	0 14	0 11	0 20	0 10	0 8	14 8	0 23	0 27	0 6	0 8	0 0	0 0	0 0	0 0	0 0	0 0	0 0	0 0	0 0	0 0	0 0	0 0	0 0
18	16205808	TTTATTTTTATATA	ATTTTTATATG	0 21	0 24	0 29	0 33	0 26	0 27	0 6	0 26	0 21	0 11	0 23	0 16	0 36	0 9	0 3	0 7	0 10	0 11	0 15	0 8	0 31	0 19	0 8	0 14	0 11	0 20	0 10	0 8	0 8	0 23	0 27	0 6	0 8	0 0	0 0	0 0	0 0	0 0	0 0	0 0	0 0	0 0	0 0	0 0	0 0	0 0
18	16205809	T	G	0 21	0 24	0 29	0 33	0 26	0 27	0 6	0 26	0 21	0 11	0 23	0 16	0 36	0 9	0 3	0 7	0 10	0 11	0 15	0 8	0 31	0 19	0 8	0 14	0 11	0 20	0 10	0 8	0 8	0 23	0 27	0 6	0 8	0 0	0 0	0 0	0 0	0 0	0 0	0 0	0 0	0 0	0 0	0 0	0 0	0 0
18	16205811	ATTTTTATATA	TATTTTTATATG	0 21	0 24	0 29	0 33	0 26	0 27	0 6	0 26	0 21	0 11	0 23	0 16	0 36	0 9	0 3	0 7	0 10	0 11	0 15	0 8	0 31	0 19	0 8	0 14	0 11	0 20	0 10	0 8	0 8	0 23	0 27	0 6	4 8	0 0	0 0	5 0	20 0	22 0	0 0	0 0	0 0	0 0	0 0	0 0	0 0	14 0
18	16205811	ATTTTTATATA	TTATTTTTATATG	0 21	0 24	0 29	0 33	0 26	0 27	0 6	0 26	0 21	0 11	0 23	0 16	0 36	0 9	0 3	0 7	0 10	0 11	0 15	0 8	0 31	0 19	0 8	0 14	0 11	0 20	0 10	0 8	0 8	0 23	0 27	0 6	0 8	16 0	8 0	0 0	0 0	0 0	15 0	13 0	0 0	0 0	0 0	0 0	0 0	0 0
18	16205811	ATTTTTATATA	TTTTTATATG	0 21	0 24	0 29	0 33	0 26	0 27	0 6	0 26	0 21	0 11	0 23	0 16	0 36	0 9	0 3	0 7	0 10	0 11	0 15	0 8	0 31	0 19	0 8	0 14	0 11	0 20	0 10	0 8	0 8	0 23	0 27	0 6	0 8	0 0	0 0	0 0	0 0	0 0	0 0	0 0	0 0	0 0	0 0	0 0	0 0	0 0
18	16205821	A	G	0 21	0 24	0 29	0 33	0 26	0 27	0 6	0 26	0 21	0 11	0 23	0 16	0 36	0 9	0 3	0 7	0 10	0 11	0 15	0 8	0 31	0 19	0 8	0 14	0 11	0 20	0 10	0 8	0 8	0 23	0 27	0 6	0 8	12 0	10 0	7 0	0 0	8 0	9 0	13 0	28 0	15 0	16 0	18 0	29 0	21 0
18	16205827	C	T	0 25	0 30	0 42	0 37	0 35	0 39	0 11	0 36	0 35	0 19	0 25	0 15	0 49	0 12	0 3	0 8	0 11	0 11	0 20	0 11	0 38	0 26	0 11	0 14	0 11	0 20	0 11	0 10	0 34	0 24	0 37	0 7	0 21	0 32	0 20	0 16	0 25	0 34	0 31	0 30	0 30	0 22	0 21	0 20	0 29	0 35
18	16205827	CCAA	TCAC	0 25	0 30	0 42	0 37	0 35	0 39	0 11	0 36	0 35	0 19	0 25	0 15	0 49	0 12	0 3	0 8	0 11	0 11	0 20	0 11	0 38	0 26	0 11	0 14	0 11	0 20	0 11	0 10	0 34	0 24	0 37	0 7	0 21	0 32	0 20	0 16	0 25	0 34	0 31	0 30	0 30	0 22	0 21	0 20	0 29	0 35
18	16205829	AAATA	GAATT	0 25	0 30	0 42	0 37	0 35	0 39	0 11	0 36	0 35	0 19	0 25	0 15	0 49	0 12	0 3	0 8	0 11	0 11	0 20	0 11	0 38	0 26	0 11	0 14	0 11	0 20	0 11	0 10	0 34	0 24	0 37	0 7	0 21	0 32	0 20	0 16	0 25	0 34	0 31	0 30	0 30	0 22	0 21	0 20	0 29	0 35
18	16205833	A	T	0 25	0 30	0 42	0 37	0 35	0 39	0 11	0 36	0 35	0 19	0 25	0 15	0 49	0 12	0 3	0 8	0 11	0 11	0 20	0 11	0 38	0 26	0 11	0 14	0 11	0 20	0 11	0 10	0 34	0 24	0 37	0 7	0 21	0 32	0 20	0 16	0 25	0 34	0 31	0 30	0 30	0 22	0 21	0 20	0 29	0 35
18	16205840	C	CGAG	0 23	0 31	0 47	0 35	0 37	0 46	0 12	0 31	0 35	0 21	0 28	0 10	0 51	0 14	0 2	0 9	0 11	0 15	0 21	0 10	0 40	9 18	0 10	0 16	0 9	0 19	0 13	0 11	28 0	9 0	33 0	4 2	11 14	22 0	17 0	15 0	21 0	27 0	26 0	25 0	27 0	19 0	20 0	16 0	25 0	31 0
18	16205845	A	AGGT	0 23	0 31	0 47	0 35	0 37	0 46	0 12	0 31	0 35	0 21	0 28	0 10	0 51	0 14	0 2	0 9	0 11	0 15	0 21	0 10	0 40	0 18	0 10	0 16	0 9	0 19	0 13	0 11	0 0	0 0	0 0	0 2	0 14	0 0	0 0	0 0	0 0	0 0	0 0	0 0	0 0	0 0	0 0	0 0	0 0	0 0
18	16205848	T	A	0 26	0 32	0 50	0 39	0 40	0 47	0 12	0 31	0 39	0 26	0 30	0 10	0 53	0 17	0 2	0 10	0 11	0 15	0 23	0 10	0 41	0 34	0 14	0 16	0 11	0 20	0 14	0 14	0 34	0 17	0 39	0 7	0 33	0 26	0 23	0 18	0 25	0 35	0 31	0 27	0 36	0 23	0 23	0 19	0 30	0 38
18	16205848	T	G	0 26	0 32	0 50	0 39	0 40	0 47	0 12	0 31	0 39	0 26	0 30	0 10	0 53	0 17	0 2	0 10	0 11	0 15	0 23	0 10	0 41	0 34	0 14	0 16	0 11	0 20	0 14	0 14	0 34	0 17	0 39	0 7	0 33	0 26	0 23	0 18	0 25	0 35	0 31	0 27	0 36	0 23	0 23	0 19	0 30	0 38
18	16205856	G	T	0 26	0 32	0 48	1 39	0 38	0 50	0 11	0 33	0 40	1 28	0 31	0 9	0 55	0 21	0 2	0 9	0 13	0 17	0 24	0 10	0 40	0 37	0 14	0 14	0 10	0 16	0 16	0 13	12 31	9 14	0 40	0 6	0 35	0 26	0 25	0 19	0 25	0 36	0 32	0 32	0 35	0 26	0 23	0 21	0 30	0 38
18	16205861	A	AT	0 23	0 33	0 46	0 36	0 38	0 51	0 13	0 35	0 38	0 29	0 32	0 9	0 52	0 19	0 2	0 9	0 13	0 15	0 23	0 11	0 37	0 38	0 15	0 17	0 8	0 13	0 16	0 15	0 33	0 14	0 41	0 7	0 20	0 27	0 25	0 17	0 24	0 36	0 29	0 31	0 35	0 26	0 23	0 19	0 29	0 38
18	16205861	A	G	0 23	0 33	0 46	0 36	0 38	0 51	0 13	0 35	0 38	0 29	0 32	0 9	0 52	0 19	0 2	0 9	0 13	0 15	0 23	0 11	0 37	0 38	0 15	0 17	0 8	0 13	0 16	0 15	0 33	0 14	0 41	0 7	16 20	0 27	0 25	0 17	0 24	0 36	0 29	0 31	0 35	0 26	0 23	0 19	0 29	0 38
18	16205862	T	C	0 23	0 33	0 46	0 36	0 38	0 51	0 13	0 35	0 38	0 29	0 32	0 9	0 52	0 19	0 2	0 9	0 13	0 15	0 23	0 11	0 37	0 38	0 15	0 17	0 8	0 13	0 16	0 15	0 33	0 14	0 41	0 7	0 20	0 27	0 25	0 17	0 24	0 36	0 29	0 31	0 35	0 26	0 23	0 19	0 29	0 38
18	16205871	A	G	0 25	0 39	0 50	0 39	0 44	0 55	0 12	0 38	0 37	0 32	0 35	0 8	0 50	0 19	0 2	0 11	0 12	0 17	0 23	0 12	0 43	0 40	0 17	0 21	0 9	0 14	0 18	0 17	0 36	0 8	0 42	0 5	0 40	0 27	0 27	0 18	0 27	0 35	0 31	0 31	0 36	0 27	0 24	0 18	0 26	0 37
18	16205871	A	T	0 25	0 39	0 50	0 39	0 44	0 55	0 12	0 38	0 37	0 32	0 35	0 8	0 50	0 19	0 2	0 11	0 12	0 17	0 23	0 12	0 43	0 40	0 17	0 21	0 9	0 14	0 18	0 17	0 36	8 8	0 42	0 5	0 40	0 27	0 27	0 18	0 27	0 35	0 31	0 31	0 36	0 27	0 24	0 18	0 26	0 37
18	16205872	AAG	A	0 23	0 38	0 43	0 35	0 39	0 51	0 13	0 34	0 33	0 29	0 34	0 9	0 48	0 17	0 2	0 8	0 10	0 16	0 23	0 11	0 36	0 36	0 15	0 21	0 8	0 9	0 14	0 16	0 34	0 15	0 38	0 6	0 38	0 21	0 26	0 20	0 27	0 33	0 29	0 29	0 35	0 26	0 23	0 19	11 13	0 34
18	16205876	GAGTG	TACTT	0 23	0 38	0 43	0 35	0 39	0 51	0 13	0 34	0 33	0 29	0 34	0 9	0 48	0 17	0 2	0 8	0 10	0 16	0 23	0 11	0 36	0 36	0 15	0 21	0 8	0 9	0 14	0 16	0 34	0 15	0 38	0 6	0 38	0 21	0 26	0 20	0 27	0 33	0 29	0 29	0 35	0 26	0 23	0 19	0 13	0 34
18	16205887	TAT	A	0 22	0 41	0 50	0 41	0 44	0 49	0 14	0 31	0 35	0 31	0 30	0 12	0 50	0 20	0 2	0 11	0 12	0 16	0 24	0 9	0 41	0 41	0 18	0 19	0 12	0 7	0 15	0 19	0 32	0 22	0 38	0 9	0 41	0 21	0 29	0 20	0 28	0 35	0 27	0 28	0 36	0 26	0 24	0 19	0 30	0 31
18	16205895	G	A	0 23	0 41	0 52	0 43	0 50	0 48	0 14	0 32	0 34	0 30	0 30	0 15	0 51	0 22	0 2	0 10	0 11	0 19	0 23	0 12	0 43	0 45	0 19	0 19	0 12	0 7	0 15	0 19	0 31	0 24	0 37	0 9	0 44	0 20	0 29	0 18	0 27	0 38	0 26	0 26	0 39	0 25	0 23	0 17	0 30	0 29
18	16205902	C	T	0 22	0 40	0 55	0 40	0 49	0 52	0 15	0 34	0 33	0 33	0 30	0 15	0 51	0 22	0 2	0 10	0 11	0 19	0 25	0 12	0 42	19 24	0 21	0 17	0 12	0 7	0 15	0 18	0 30	0 26	0 35	0 8	0 44	0 23	0 29	0 17	0 27	0 40	0 28	0 29	0 38	0 28	0 24	0 17	0 33	0 30
18	16205905	TAA	T	0 19	0 40	0 51	0 36	0 45	0 48	0 13	0 36	0 35	0 31	0 28	0 15	0 50	0 20	0 2	0 9	0 10	0 18	0 21	0 10	0 45	0 40	0 22	0 18	0 12	0 7	0 15	0 17	0 30	0 23	0 32	0 8	0 41	12 7	13 15	0 15	0 27	14 25	10 17	9 18	34 0	23 0	22 0	16 0	30 0	16 13
18	16205917	ATTA	GTTG	0 22	0 41	0 47	0 41	0 48	0 53	0 14	0 42	0 37	0 29	0 28	0 17	0 47	0 20	0 1	0 9	0 12	0 20	0 24	0 11	0 42	0 38	0 22	0 17	0 15	0 9	0 15	0 15	0 31	0 28	0 36	0 8	0 43	0 20	0 28	0 15	0 25	0 39	0 26	0 27	0 37	0 28	0 25	0 17	0 31	0 26
18	16205924	TCGGTTGTTAAC	T	0 20	0 37	0 36	0 37	0 43	0 48	0 13	0 46	0 27	0 28	0 26	0 20	0 34	0 18	0 2	0 7	0 11	0 17	0 13	0 10	0 38	0 31	0 20	0 13	0 12	0 9	0 14	0 14	0 31	0 29	0 29	0 10	0 40	0 19	0 25	0 14	0 25	0 32	0 24	0 29	0 31	0 25	0 23	0 14	0 28	0 21
18	16205935	C	T	0 20	0 37	0 36	0 37	0 43	0 48	0 13	0 46	0 27	0 28	0 26	0 20	0 34	0 18	0 2	0 7	0 11	0 17	8 13	0 10	0 38	0 31	0 20	0 13	0 12	0 9	0 14	0 14	0 31	0 29	0 29	0 10	0 40	0 19	0 25	0 14	0 25	0 32	0 24	0 29	0 31	0 25	0 23	0 14	0 28	0 21
18	16205940	T	G	0 21	0 40	0 43	0 41	0 51	0 50	0 15	0 53	0 37	0 29	0 27	0 22	0 38	0 22	0 2	0 10	0 14	0 19	0 24	0 13	0 45	0 33	0 23	0 15	0 17	0 9	0 14	0 12	0 42	0 36	0 38	0 9	0 43	13 10	14 13	0 14	0 26	14 18	12 15	12 19	35 0	27 0	25 0	15 0	26 0	14 9
18	16205941	T	A	0 20	0 40	0 45	0 43	0 52	0 50	0 15	0 54	1 36	0 27	0 26	0 22	0 38	0 20	0 2	0 10	0 14	0 20	0 24	0 13	1 44	18 16	0 22	0 15	0 17	0 8	0 14	0 12	19 22	17 20	20 19	2 7	18 24	10 13	12 14	14 0	26 0	17 14	14 12	19 12	0 34	0 26	0 25	0 14	0 28	9 14
18	16205948	T	A	0 19	0 43	0 45	0 41	0 50	0 51	0 16	0 54	0 37	0 24	0 27	0 23	0 36	0 21	0 2	0 9	0 14	0 21	0 24	0 13	0 46	0 32	0 21	0 17	0 17	0 9	0 12	0 10	0 40	0 39	0 32	0 9	0 37	0 23	13 14	0 13	0 28	0 32	0 24	0 33	0 32	0 30	0 27	0 19	0 29	0 24
18	16205948	T	C	0 19	0 43	0 45	0 41	0 50	0 51	0 16	0 54	0 37	0 24	0 27	0 23	0 36	0 21	0 2	0 9	0 14	0 21	0 24	0 13	0 46	0 32	0 21	0 17	0 17	0 9	0 12	0 10	0 40	0 39	0 32	0 9	0 37	0 23	0 14	0 13	0 28	0 32	0 24	0 33	0 32	0 30	0 27	0 19	0 29	0 24
18	16205960	A	C	0 17	0 42	0 51	0 44	0 45	0 50	0 13	0 56	0 42	0 21	0 26	0 23	0 34	0 16	0 1	0 8	0 13	0 18	0 23	0 13	1 48	0 30	0 20	0 16	0 17	0 11	0 11	0 11	0 43	0 39	0 36	0 10	0 35	0 22	0 27	0 12	0 28	0 30	0 23	0 33	0 35	0 25	0 25	0 19	0 32	0 25
18	16205960	A	G	0 17	0 42	0 51	0 44	0 45	0 50	0 13	1 56	0 42	0 21	0 26	0 23	0 34	1 16	0 1	0 8	0 13	0 18	0 23	0 13	0 48	0 30	0 20	0 16	0 17	0 11	0 11	0 11	0 43	0 39	0 36	0 10	0 35	0 22	0 27	0 12	0 28	0 30	0 23	0 33	0 35	0 25	0 25	0 19	0 32	0 25
18	16205971	TTGGTTT	ATGGTTA	0 11	0 28	0 33	0 26	0 27	0 36	0 9	0 43	0 27	0 15	0 17	0 13	0 26	0 14	0 2	0 7	0 9	0 13	0 14	0 7	1 30	11 10	0 12	0 10	0 11	0 11	0 7	0 7	10 0	17 15	12 12	2 7	12 9	0 0	0 0	0 0	10 0	14 0	0 0	0 0	0 0	0 0	0 0	0 0	0 0	6 0
18	16205971	TTGGTTT	ATGGTTAAAAACTTA	0 11	0 28	0 33	0 26	0 27	0 36	0 9	0 43	0 27	0 15	0 17	0 13	0 26	0 14	0 2	0 7	0 9	0 13	0 14	0 7	0 30	0 10	0 12	0 10	0 11	0 11	0 7	0 7	0 0	0 15	0 12	0 7	0 9	6 0	9 0	8 0	10 0	0 0	8 0	12 0	0 0	0 0	0 0	0 0	0 0	0 0
18	16205973	GGTTT	AGTTA	0 11	0 28	0 33	0 26	0 27	0 36	0 9	0 43	0 27	0 15	0 17	0 13	0 26	0 14	0 2	0 7	0 9	0 13	0 14	0 7	0 30	0 10	0 12	0 10	0 11	0 11	0 7	0 7	0 0	0 15	0 12	0 7	0 9	0 0	0 0	0 0	0 0	0 0	0 0	0 0	0 0	0 0	0 0	0 0	0 0	0 0
18	16205977	T	A	0 11	0 28	0 33	0 26	0 27	0 36	0 9	0 43	0 27	0 15	0 17	0 13	0 26	0 14	0 2	0 7	0 9	0 13	0 14	0 7	0 30	0 10	0 12	0 10	0 11	0 11	0 7	0 7	19 0	0 15	0 12	0 7	0 9	0 0	0 0	0 0	0 0	0 0	0 0	0 0	0 0	0 0	0 0	0 0	12 0	0 0
18	16205977	TAAACTTTAAATCTCTTGTTGC	AAAA	0 11	0 28	0 33	0 26	0 27	0 36	0 9	0 43	0 27	0 15	0 17	0 13	0 26	0 14	0 2	0 7	0 9	0 13	0 14	0 7	0 30	0 10	0 12	0 10	0 11	0 11	0 7	0 7	0 0	0 15	0 12	0 7	0 9	8 0	7 0	0 0	0 0	6 0	6 0	12 0	24 0	21 0	18 0	15 0	10 0	8 0
18	16206005	G	T	0 23	0 39	0 49	0 46	0 41	0 48	0 16	0 64	0 40	0 23	0 24	0 23	0 40	0 20	0 3	0 8	0 11	0 17	0 18	0 14	0 52	0 31	0 15	0 18	0 12	0 16	0 14	0 14	0 57	0 52	0 45	0 9	0 26	0 18	0 19	0 13	0 27	0 26	0 20	0 25	0 26	0 26	0 20	0 17	0 31	0 24
18	16206015	C	G	0 24	0 34	0 51	0 49	0 44	0 45	0 15	0 60	0 38	0 42	0 42	0 45	0 43	0 36	0 5	0 15	0 10	0 15	0 16	0 12	0 56	0 33	0 15	1 19	0 9	0 16	0 12	0 15	0 52	0 47	0 42	0 9	0 26	0 22	0 19	0 12	0 25	0 29	0 21	0 26	0 28	0 28	0 21	0 19	0 32	0 26
18	16206017	A	C	0 23	0 34	0 53	0 50	0 43	0 45	0 13	0 59	0 40	0 45	0 44	0 44	0 43	0 37	0 5	0 16	0 11	0 16	0 16	0 13	0 56	0 34	0 14	0 20	0 10	0 16	0 13	0 15	27 24	0 46	0 40	0 9	0 26	0 21	0 19	0 13	0 25	0 30	0 24	0 25	0 28	0 28	0 21	0 20	0 33	0 27
18	16206018	A	G	0 23	0 36	0 52	0 49	0 42	0 45	0 12	0 59	0 40	0 46	0 44	0 43	0 43	0 36	0 5	0 16	0 11	0 16	0 16	0 13	0 55	21 13	0 14	0 20	0 10	0 16	0 13	0 15	24 28	25 21	24 16	3 4	0 26	0 21	0 18	0 12	0 26	0 30	0 23	0 25	0 27	0 27	0 22	0 20	0 33	0 27
18	16206026	T	C	0 25	0 35	0 55	0 50	0 44	0 42	0 11	0 58	0 45	0 48	0 46	0 48	0 45	0 35	0 4	0 16	0 11	0 15	0 18	0 12	0 62	0 38	0 15	0 21	0 9	0 16	0 12	0 16	0 48	0 43	0 40	0 9	0 28	0 22	0 19	0 14	0 23	0 29	0 24	0 25	0 29	0 26	0 22	0 18	0 32	0 29
18	16206028	G	A	0 25	0 35	0 54	0 49	0 43	0 45	0 12	0 59	0 45	0 49	0 48	0 48	0 46	0 37	0 5	0 17	0 11	0 15	0 18	0 12	0 61	0 38	0 15	1 20	0 9	0 16	0 12	0 16	0 49	0 44	0 41	0 10	0 29	0 22	0 18	0 14	0 22	0 30	0 23	0 25	0 27	0 27	0 20	0 21	0 32	0 28
18	16206030	A	T	0 25	0 36	0 54	0 49	0 44	0 44	0 12	0 58	0 44	0 49	0 47	0 50	0 49	0 38	0 5	0 16	0 10	0 16	0 19	0 13	0 62	0 38	0 13	0 22	0 9	0 17	0 12	0 15	0 47	0 45	0 41	0 11	14 14	12 9	6 12	14 0	22 0	18 11	10 13	10 16	0 27	0 27	0 21	0 21	0 31	13 15
18	16206048	C	A	0 25	0 33	0 47	0 51	0 36	0 42	0 11	0 60	0 43	0 47	0 54	0 52	0 53	0 35	0 6	0 19	0 12	0 14	0 18	0 13	0 59	18 15	0 16	0 28	0 7	0 18	0 13	0 13	30 17	24 19	23 18	5 6	0 27	0 21	0 17	0 17	0 27	0 26	1 30	0 25	0 25	0 25	0 22	0 22	0 31	0 29
18	16206050	C	T	0 27	0 30	0 47	0 51	0 36	0 42	0 11	0 59	0 43	0 45	0 55	0 55	0 53	0 35	0 6	0 19	0 13	0 14	0 15	0 14	0 59	0 33	0 16	0 28	0 7	0 18	0 13	0 14	0 48	0 42	0 38	0 11	0 28	0 20	0 15	0 17	0 29	0 24	0 30	0 26	0 25	0 26	0 21	0 22	0 31	0 29
18	16206060	T	C	0 33	0 29	0 40	0 50	0 36	0 44	0 12	0 55	0 39	0 48	0 56	0 50	0 53	0 34	0 7	0 17	0 12	0 15	0 18	0 15	0 56	19 16	0 15	0 24	0 9	0 17	0 13	0 13	33 19	23 16	17 17	5 6	0 27	0 21	0 20	0 17	0 30	0 24	0 34	0 25	0 23	0 24	0 22	0 23	0 29	0 29
18	16206066	G	A	0 35	0 29	0 42	0 47	0 34	0 42	0 13	0 53	0 39	0 45	0 56	0 51	0 53	0 33	0 7	0 15	0 11	0 17	0 20	0 15	0 52	0 33	0 15	0 24	0 9	0 17	0 12	0 14	0 50	0 40	0 34	0 11	0 30	0 22	0 23	0 16	0 28	0 24	0 35	0 22	0 23	0 25	0 22	0 26	12 16	0 28
18	16206070	C	CTTAA	0 36	0 30	0 40	0 46	0 34	0 42	0 13	0 51	0 41	0 46	0 56	0 49	0 48	0 31	0 6	0 13	0 10	0 17	0 21	0 16	0 50	0 35	0 18	0 24	0 10	0 16	0 13	0 14	0 47	0 35	0 33	0 12	0 31	0 21	0 23	0 17	0 29	0 25	0 37	0 21	0 25	0 26	0 23	0 25	0 25	0 28
18	16206075	T	C	0 37	0 31	0 42	0 47	0 36	0 43	0 12	0 50	0 42	0 49	0 58	0 52	0 48	0 32	0 7	0 12	0 13	0 15	0 22	0 15	0 53	0 35	0 17	0 24	0 11	0 16	0 14	0 15	0 46	0 38	17 17	0 12	0 34	0 20	0 23	0 16	0 30	0 24	0 36	0 20	0 25	0 26	0 22	0 22	0 23	0 28
18	16206086	A	T	0 38	0 31	0 40	0 46	0 37	0 44	0 12	0 51	0 44	0 49	0 59	1 52	0 45	0 31	0 9	0 14	0 14	0 14	0 24	0 16	0 53	0 34	0 18	0 25	0 11	0 13	0 16	0 11	0 38	0 34	0 28	0 12	0 39	0 19	0 23	0 20	0 31	0 30	0 35	0 19	0 22	0 26	0 21	0 26	0 25	0 29
18	16206091	A	T	0 38	0 31	0 37	0 44	0 36	0 46	0 13	0 52	0 45	0 47	0 60	0 50	0 44	0 33	0 10	0 14	0 13	0 15	0 23	0 17	0 49	0 32	0 19	0 23	0 12	0 13	0 14	0 11	0 39	0 34	0 27	0 11	0 40	0 19	0 22	0 21	0 32	0 31	1 37	0 19	0 22	0 27	0 22	0 25	0 26	0 31
18	16206094	A	G	0 39	0 30	0 37	0 44	0 32	0 46	0 13	0 52	0 48	0 49	0 62	0 53	0 44	0 35	0 10	0 14	0 13	0 15	0 22	0 15	0 48	0 34	0 21	0 25	0 13	0 12	0 15	0 12	13 26	0 36	0 30	0 13	0 40	0 20	0 21	0 22	0 32	0 30	0 37	0 20	0 23	0 26	0 22	0 26	0 28	0 29
18	16206101	T	G	0 35	0 34	0 33	0 42	0 33	0 48	0 12	0 49	1 45	0 48	0 60	0 52	0 46	0 34	0 9	0 13	0 14	0 15	0 23	0 15	0 48	19 17	0 21	0 25	0 12	0 12	0 16	0 13	40 0	36 0	27 0	13 0	17 27	19 0	19 0	22 0	29 0	30 0	36 0	20 0	21 0	25 0	22 0	27 0	27 0	29 0
18	16206105	CCT	C	0 32	0 36	0 31	0 43	0 34	0 47	0 12	0 50	0 46	0 48	0 60	0 47	0 48	0 34	0 9	0 15	0 12	0 16	0 23	0 14	0 48	0 37	0 22	0 23	0 12	0 10	0 17	0 14	0 43	0 37	0 28	0 13	0 44	0 19	0 19	0 21	0 30	0 31	0 35	0 21	0 19	0 26	0 22	0 26	0 15	0 29
18	16206107	T	C	0 32	0 36	0 31	0 43	0 34	0 47	0 12	0 50	0 46	0 48	0 60	1 47	0 48	0 34	0 9	0 15	0 12	0 16	0 23	0 14	0 48	0 37	0 22	0 23	0 12	0 10	0 17	0 14	0 43	0 37	0 28	0 13	0 44	0 19	0 19	0 21	0 30	0 31	0 35	0 21	0 19	0 26	0 22	0 26	11 15	0 29
18	16206110	A	G	0 32	0 39	0 31	0 47	0 34	0 49	0 13	0 53	0 47	0 49	0 61	0 51	0 48	0 36	0 9	0 15	0 13	0 15	0 24	0 14	0 49	0 39	0 22	0 24	0 12	0 11	0 17	0 14	0 48	0 36	0 28	0 12	0 47	0 19	0 19	0 19	0 30	0 29	0 36	0 19	0 17	0 26	0 25	0 25	0 25	0 28
18	16206117	AAG	A	0 26	0 33	0 20	0 37	0 24	0 41	0 11	0 42	0 35	0 37	0 50	0 38	0 42	0 29	0 8	0 11	0 12	0 13	0 20	0 12	0 37	0 15	8 12	0 20	0 13	0 9	0 15	0 11	0 0	0 0	0 0	0 0	0 26	8 7	5 11	19 0	11 0	0 8	12 24	7 9	0 16	0 20	0 20	0 22	0 23	0 28
18	16206119	GAGAG	TGATAAAGAGAA	0 26	0 33	0 20	0 37	0 24	0 41	0 11	0 42	0 35	0 37	0 50	0 38	0 42	0 29	0 8	0 11	0 12	0 13	0 20	0 12	0 37	0 15	0 12	0 20	0 13	0 9	0 15	0 11	0 0	0 0	0 0	0 0	0 26	0 7	0 11	0 0	0 0	0 8	0 24	0 9	0 16	0 20	0 20	0 22	0 23	0 28
18	16206123	G	A	0 26	0 33	0 20	0 37	0 24	0 41	0 11	0 42	0 35	0 37	0 50	0 38	0 42	0 29	0 8	0 11	0 12	0 13	0 20	0 12	0 37	16 15	0 12	0 20	0 13	0 9	0 15	0 11	40 0	30 0	25 0	12 0	15 26	0 7	0 11	0 0	14 0	17 8	0 24	0 9	0 16	0 20	0 20	0 22	0 23	0 28
18	16206155	CA	C	0 29	0 45	0 32	0 38	0 45	0 49	0 18	0 54	0 41	0 44	0 58	0 41	0 40	0 40	0 8	0 15	0 13	0 20	0 23	0 12	0 47	0 43	0 21	0 18	0 13	0 9	0 18	0 23	0 48	0 35	0 35	0 11	0 55	0 20	0 19	0 22	0 31	0 26	0 38	0 22	0 23	0 22	0 24	0 25	0 25	0 29
18	16206156	ATT	TTC	0 29	0 45	0 32	0 38	0 45	0 49	0 18	0 54	0 41	0 44	0 58	0 41	0 40	0 40	0 8	0 15	0 13	0 20	0 23	0 12	0 47	0 43	0 21	0 18	0 13	0 9	0 18	0 23	0 48	0 35	0 35	0 11	0 55	0 20	0 19	0 22	0 31	0 26	0 38	0 22	0 23	0 22	0 24	0 25	0 25	0 29
18	16206164	GC	AT	0 27	0 48	0 32	0 35	0 48	0 51	0 18	0 58	0 45	0 48	0 61	0 44	0 41	0 43	0 8	0 16	0 15	0 19	0 21	0 11	0 49	0 44	0 22	0 19	0 15	0 11	0 19	0 23	0 46	0 32	0 36	0 12	0 63	0 19	0 20	0 21	0 31	0 25	0 38	0 19	0 23	0 21	0 23	0 26	0 25	0 31
18	16206165	C	T	0 27	0 48	0 32	0 35	0 48	0 51	0 18	0 58	0 45	0 48	0 61	0 44	0 41	0 43	0 8	0 16	0 15	0 19	0 21	0 11	0 49	0 44	0 22	0 19	0 15	0 11	0 19	0 23	0 46	0 32	0 36	0 12	0 63	0 19	0 20	0 21	0 31	0 25	0 38	0 19	0 23	1 21	0 23	0 26	0 25	0 31
18	16206172	A	T	0 29	0 52	0 35	0 38	0 49	0 54	0 17	0 57	0 48	0 50	0 59	0 47	0 39	0 49	0 9	0 18	0 16	0 19	0 19	0 15	0 53	0 45	0 17	0 20	0 14	0 11	0 21	0 25	0 50	0 37	0 41	0 13	0 59	0 22	0 21	0 19	0 31	0 26	0 36	0 19	0 21	0 22	0 23	0 27	0 26	0 32
18	16206190	TA	AT	0 27	0 49	0 36	0 39	0 47	0 45	0 16	0 54	0 46	0 55	0 53	0 39	0 44	0 46	0 5	0 20	0 15	10 10	0 20	0 13	0 53	0 53	0 18	0 21	0 15	0 12	0 20	0 26	0 53	0 36	0 44	0 14	0 55	0 21	0 21	0 19	0 30	0 30	0 33	0 20	0 23	0 24	0 25	0 26	0 25	0 30
18	16206218	G	A	0 29	0 43	0 47	0 38	0 50	0 50	0 15	0 38	0 45	0 53	0 62	0 43	0 39	0 39	0 4	0 20	0 14	0 24	0 22	0 17	0 52	25 23	0 20	0 21	0 13	0 11	0 17	0 26	52 0	25 17	54 0	6 7	28 23	20 0	17 0	17 0	27 0	33 0	22 0	23 0	22 0	23 0	21 0	29 0	26 0	34 0
18	16206218	G	T	0 29	0 43	0 47	0 38	0 50	0 50	0 15	0 38	0 45	0 53	0 62	0 43	0 39	0 39	0 4	0 20	0 14	0 24	0 22	0 17	0 52	0 23	0 20	0 21	0 13	0 11	0 17	0 26	0 0	0 17	0 0	0 7	0 23	0 0	0 0	0 0	0 0	0 0	0 0	0 0	0 0	0 0	0 0	0 0	0 0	0 0
18	16206229	T	A	0 30	0 52	0 50	1 41	0 48	0 53	0 14	0 42	0 49	0 59	0 66	0 52	0 46	0 43	0 4	0 20	0 14	0 26	0 22	0 21	0 52	0 46	0 17	0 22	0 14	0 10	0 17	0 28	0 51	0 41	0 57	0 14	0 47	0 20	0 19	0 16	0 26	0 31	0 21	0 24	0 22	0 23	0 23	0 30	0 27	0 33
18	16206236	T	C	0 30	0 52	0 47	0 43	0 48	0 55	0 15	0 42	0 49	0 55	0 68	0 53	0 46	0 43	0 4	0 20	0 12	0 27	0 23	0 21	0 55	0 44	0 16	0 22	0 14	0 9	0 18	0 25	0 54	0 41	0 55	0 13	0 46	0 23	0 20	0 16	0 27	0 29	0 21	0 25	0 24	0 21	0 24	0 32	0 26	0 31
18	16206237	G	A	0 29	0 51	1 47	0 43	0 49	0 54	0 14	0 41	0 49	0 54	0 67	0 53	0 47	0 42	0 4	0 19	0 12	0 29	0 22	0 21	0 55	0 45	0 16	0 21	0 14	0 9	0 17	0 26	0 53	0 41	0 54	0 13	0 47	0 25	0 22	0 16	0 26	0 29	0 21	0 25	0 24	0 22	0 27	0 32	0 28	0 32
18	16206237	G	T	0 29	0 51	0 47	0 43	0 49	0 54	0 14	0 41	0 49	0 54	0 67	0 53	0 47	0 42	0 4	0 19	0 12	0 29	0 22	0 21	0 55	0 45	0 16	0 21	0 14	0 9	0 17	0 26	0 53	0 41	0 54	0 13	0 47	0 25	0 22	0 16	0 26	0 29	0 21	0 25	0 24	0 22	0 27	0 32	0 28	0 32
18	16206255	A	G	0 31	0 52	0 51	0 53	0 51	0 58	0 11	0 39	0 51	0 57	0 63	0 47	0 47	0 45	0 5	0 18	0 12	0 25	0 18	0 22	0 47	0 38	0 17	0 19	0 17	0 9	0 20	0 32	0 55	0 45	0 62	0 13	0 47	0 28	0 26	0 14	0 35	0 32	0 19	0 22	0 26	0 25	0 29	0 31	0 25	0 35
18	16206258	A	G	0 32	0 51	0 51	0 53	0 50	0 53	0 10	0 39	0 50	0 56	0 63	0 47	0 51	0 43	0 5	0 18	0 12	0 25	0 18	0 23	0 48	0 38	0 17	0 18	0 15	0 9	0 20	0 32	0 55	0 44	0 57	0 13	0 46	0 29	0 27	0 16	0 35	0 31	0 18	0 23	0 25	0 26	0 29	0 28	0 26	0 36
18	16206271	CAG	C	0 30	0 47	0 53	0 53	0 48	0 55	0 12	0 41	0 46	0 54	0 63	0 43	0 50	0 43	0 5	0 16	0 10	0 24	0 20	0 20	0 47	0 41	0 17	0 17	0 14	0 9	0 18	0 30	23 27	0 48	0 55	0 13	0 39	0 31	0 27	0 17	0 33	0 30	0 19	0 21	0 26	0 26	0 30	0 32	0 25	0 36
18	16206271	C	CGCAGGGACTA	0 30	0 47	0 53	0 53	0 48	0 55	0 12	0 41	0 46	0 54	0 63	0 43	0 50	0 43	0 5	0 16	0 10	0 24	0 20	0 20	0 47	0 41	0 17	0 17	0 14	0 9	0 18	0 30	0 27	0 48	0 55	0 13	0 39	0 31	0 27	0 17	0 33	0 30	0 19	0 21	0 26	0 26	0 30	0 32	0 25	0 36
18	16206273	G	C	0 30	0 47	0 53	0 53	0 48	0 55	0 12	0 41	0 46	0 54	0 63	0 43	0 50	0 43	0 5	0 16	0 10	0 24	0 20	0 20	0 47	0 41	0 17	0 17	0 14	0 9	0 18	0 30	0 27	0 48	0 55	0 13	0 39	0 31	0 27	0 17	0 33	0 30	0 19	0 21	0 26	0 26	0 30	0 32	0 25	0 36
18	16206273	G	T	0 30	0 47	0 53	0 53	0 48	0 55	0 12	0 41	0 46	0 54	0 63	0 43	0 50	0 43	0 5	0 16	0 10	0 24	0 20	0 20	0 47	0 41	0 17	0 17	0 14	0 9	0 18	0 30	1 27	0 48	0 55	0 13	0 39	0 31	0 27	0 17	0 33	0 30	0 19	0 21	0 26	0 26	0 30	0 32	0 25	0 36
18	16206286	C	T	0 38	0 48	0 59	0 50	0 50	0 62	0 14	0 44	0 44	0 56	0 67	0 43	0 47	0 44	0 7	0 14	0 14	0 24	0 18	0 22	0 42	0 36	0 21	0 20	0 14	0 11	0 22	0 33	0 47	0 47	0 60	0 12	0 42	0 26	0 27	0 18	0 31	0 28	0 20	0 20	0 28	0 27	0 32	0 30	0 22	0 36
18	16206292	CA	AATAT	0 37	0 46	0 46	0 43	0 42	0 59	0 12	0 42	0 38	0 54	0 58	0 36	0 47	0 37	0 8	0 14	0 14	0 23	0 14	0 21	0 40	0 32	0 16	0 16	0 12	0 9	0 18	0 33	0 38	16 25	0 42	8 4	0 36	0 0	0 0	0 0	0 0	0 0	0 0	0 0	0 0	0 0	0 0	0 0	0 8	0 0
18	16206296	CAATG	TAATA	0 37	0 46	0 46	0 43	0 42	0 59	0 12	0 42	0 38	0 54	0 58	0 36	0 47	0 37	0 8	0 14	0 14	0 23	0 14	0 21	0 40	0 32	0 16	0 16	0 12	0 9	0 18	0 33	0 38	0 25	0 42	0 4	0 36	18 0	12 0	19 0	17 0	0 0	11 0	12 0	0 0	0 0	0 0	0 0	0 8	0 0
18	16206300	G	A	0 37	0 46	0 46	0 43	0 42	0 59	0 12	0 42	0 38	0 54	0 58	0 36	0 47	0 37	0 8	0 14	0 14	0 23	0 14	0 21	0 40	0 32	0 16	0 16	0 12	0 9	0 18	0 33	0 38	0 25	0 42	0 4	0 36	8 0	15 0	0 0	16 0	26 0	7 0	6 0	31 0	27 0	30 0	30 0	11 8	34 0
18	16206311	C	T	0 42	0 49	0 51	0 51	0 44	0 65	0 18	0 52	0 45	0 57	0 71	0 40	0 60	0 41	0 9	0 15	0 18	0 23	0 17	0 20	0 50	0 34	0 16	0 19	0 15	0 11	0 16	0 33	0 37	0 45	0 42	0 12	0 42	0 31	0 26	0 22	0 35	0 30	0 18	0 22	0 33	0 25	0 33	0 31	0 20	0 35
18	16206320	G	A	0 39	0 47	1 53	0 54	0 49	0 63	0 19	0 53	0 48	0 57	0 71	0 44	0 58	0 42	0 11	0 14	0 17	0 23	0 16	0 16	0 45	0 36	0 15	0 18	0 15	0 9	0 14	0 37	0 40	0 49	0 42	0 14	0 46	0 30	0 25	0 23	0 34	0 29	0 16	0 25	0 38	0 28	0 36	0 32	9 11	0 32
18	16206325	G	A	0 40	0 47	0 56	0 54	0 47	0 63	0 19	0 52	0 45	0 58	0 69	0 43	0 51	0 41	0 11	0 15	0 18	0 24	0 16	0 15	0 45	0 36	0 14	0 16	0 14	0 12	0 15	0 35	20 17	0 47	0 46	0 14	0 42	0 31	0 25	0 26	0 36	0 26	0 17	0 28	0 37	0 32	0 37	0 34	0 21	0 33
18	16206325	GA	G	0 40	0 47	0 56	0 54	0 47	0 63	0 19	0 52	0 45	0 58	0 69	0 43	0 51	0 41	0 11	0 15	0 18	0 24	0 16	0 15	0 45	0 36	0 14	0 16	0 14	0 12	0 15	0 35	0 17	0 47	0 46	0 14	0 42	0 31	0 25	0 26	0 36	0 26	0 17	0 28	0 37	0 32	0 37	0 34	0 21	0 33
18	16206329	C	T	0 41	0 46	0 57	0 55	0 48	0 62	0 20	0 54	0 44	0 56	0 71	0 42	0 51	0 44	0 11	0 16	0 17	0 24	0 14	0 15	0 45	0 36	0 13	0 16	0 14	0 12	0 16	0 37	0 35	0 48	0 47	0 14	0 44	0 31	0 25	0 26	0 37	0 25	0 19	0 26	0 38	0 33	0 37	0 33	10 12	0 33
18	16206330	G	T	0 41	0 46	0 57	0 55	0 46	0 63	0 20	0 54	0 45	0 56	0 69	0 44	0 52	0 44	0 11	0 15	0 18	0 23	0 13	0 15	0 46	0 37	0 14	0 16	0 14	0 12	0 15	0 37	0 34	0 45	0 45	0 13	0 46	0 31	0 24	0 26	0 37	0 26	0 19	0 28	0 37	0 33	0 37	0 35	0 23	0 34
18	16206338	A	G	0 44	0 45	0 55	0 56	0 46	0 64	0 21	0 55	0 50	0 59	0 70	0 43	0 49	0 43	0 11	0 16	0 20	0 21	0 13	0 15	0 44	0 40	0 17	0 16	0 14	0 13	0 14	0 37	0 39	0 47	0 41	0 15	0 40	0 33	0 23	0 27	0 36	0 27	0 21	0 28	0 41	0 32	0 36	0 36	0 23	0 35
18	16206345	T	TC	0 45	0 39	0 56	0 53	0 43	0 65	0 23	0 53	0 50	0 54	0 68	0 40	0 50	0 45	0 10	0 13	0 17	0 20	0 15	0 15	0 44	0 42	0 16	0 15	0 11	0 14	0 14	0 32	0 37	0 45	0 39	0 15	0 43	0 31	0 22	0 26	0 34	0 22	0 20	0 27	0 41	0 30	0 34	0 32	0 20	0 33
18	16206390	T	C	0 46	0 48	0 45	0 51	0 40	0 49	0 17	0 52	0 42	0 54	0 75	0 48	0 48	0 47	0 8	0 14	0 20	0 21	0 18	0 14	0 45	22 17	0 22	0 13	0 12	0 16	0 16	0 30	26 22	25 26	0 42	7 7	0 42	0 31	0 15	0 33	0 44	0 24	0 28	0 28	0 45	0 36	0 33	0 38	0 23	0 37
18	16206398	CCAC	TTAT	0 45	0 46	0 43	0 43	0 40	0 41	0 16	0 49	0 44	0 48	0 70	0 47	0 46	0 45	0 9	0 14	0 19	0 20	0 21	0 16	0 44	0 16	0 22	0 12	0 11	0 16	0 14	0 32	0 0	0 0	0 46	0 0	0 44	0 0	0 0	0 0	0 0	0 0	0 0	0 0	0 0	0 0	0 0	0 0	0 0	0 0
18	16206399	CAC	TAT	0 45	0 46	0 43	0 43	0 40	0 41	0 16	0 49	0 44	0 48	0 70	0 47	0 46	0 45	0 9	0 14	0 19	0 20	0 21	0 16	0 44	23 16	0 22	0 12	0 11	0 16	0 14	0 32	44 0	47 0	0 46	13 0	0 44	29 0	13 0	32 0	32 0	20 0	24 0	28 0	44 0	32 0	28 0	35 0	22 0	30 0
18	16206453	T	A	0 43	0 40	0 43	0 37	0 43	0 39	0 13	0 46	0 37	0 51	0 73	0 41	0 46	0 42	0 13	0 13	0 22	0 17	0 24	0 23	0 51	0 36	0 26	0 12	0 8	0 15	0 19	0 35	0 39	13 26	0 36	6 8	0 55	0 33	0 12	0 33	0 40	0 27	0 26	0 32	0 44	0 41	0 34	0 33	0 22	0 32
18	16206456	G	A	0 41	0 39	0 44	0 39	0 44	0 43	0 13	0 45	0 36	0 49	0 70	0 40	0 46	0 40	0 11	0 13	0 21	0 16	0 24	0 23	0 51	0 37	0 24	0 12	0 8	0 14	0 18	0 35	0 38	0 37	0 34	0 14	0 53	0 33	0 14	0 31	0 42	0 27	0 26	0 31	0 45	0 42	0 37	0 34	0 23	0 31
18	16206462	T	G	0 39	0 42	0 46	0 39	0 44	0 48	0 12	19 24	22 19	0 51	0 71	0 37	0 43	0 40	0 11	0 12	0 21	0 16	0 24	0 22	0 53	0 34	0 22	0 14	0 7	6 9	0 17	0 35	0 43	0 40	0 33	0 14	0 55	0 30	0 13	0 29	0 45	0 27	0 22	0 29	0 44	0 43	0 37	0 35	0 22	0 32
18	16206467	T	A	0 40	0 41	0 43	0 35	0 42	0 49	0 13	0 42	0 41	0 49	0 70	0 43	0 43	0 39	0 12	0 12	0 20	0 16	0 24	0 23	0 55	0 34	0 20	0 15	0 7	0 13	0 16	0 33	0 38	0 35	0 37	0 14	0 56	0 31	0 13	0 32	0 45	0 27	0 24	0 27	0 42	0 43	0 39	0 33	0 24	0 34
18	16206488	C	T	0 37	0 36	0 47	0 47	0 43	0 48	0 18	0 46	0 44	0 45	0 63	0 38	0 45	0 34	0 11	0 11	0 15	0 14	0 23	0 20	0 63	0 38	0 18	0 12	0 7	0 15	0 14	0 31	0 39	0 39	16 15	0 14	0 53	0 31	0 21	0 30	0 46	0 31	0 21	0 22	0 41	0 42	0 41	0 34	0 26	0 35
18	16206498	G	A	0 35	0 37	0 44	0 56	0 41	0 49	0 18	0 49	0 42	0 47	0 61	0 41	0 43	0 37	0 10	0 11	0 14	0 16	0 20	0 17	0 58	0 39	0 19	0 14	0 8	0 14	0 13	0 30	16 26	0 41	0 30	0 16	0 50	0 31	0 19	0 27	0 46	0 32	0 25	0 22	0 42	0 48	0 42	0 35	0 25	0 35
18	16206509	C	T	0 39	0 35	0 41	0 54	0 40	0 46	0 14	0 51	0 40	0 45	0 59	0 44	0 42	0 37	0 10	0 11	0 14	0 18	0 18	0 15	0 59	19 21	0 18	0 15	0 8	0 12	0 11	0 30	0 43	0 35	0 30	0 14	0 42	31 0	20 0	27 0	45 0	36 0	24 0	22 0	45 0	50 0	44 0	32 0	25 0	38 0
18	16206523	G	A	0 37	0 29	0 35	0 54	0 39	0 46	0 12	0 55	0 39	0 46	0 65	0 43	0 44	0 33	0 8	0 10	0 10	0 16	0 16	0 14	0 54	16 24	0 16	0 12	0 4	0 14	0 6	0 28	41 0	33 0	0 26	14 0	0 41	34 0	24 0	27 0	48 0	34 0	22 0	22 0	43 0	48 0	41 0	16 0	26 0	35 0
18	16206523	GGCC	AGCG	0 37	0 29	0 35	0 54	0 39	0 46	0 12	0 55	0 39	0 46	0 65	0 43	0 44	0 33	0 8	0 10	0 10	0 16	0 16	0 14	0 54	0 24	0 16	0 12	0 4	0 14	0 6	0 28	0 0	0 0	0 26	0 0	0 41	0 0	0 0	0 0	0 0	0 0	0 0	0 0	0 0	0 0	0 0	16 0	0 0	0 0
18	16206537	G	GTAC	0 45	0 30	0 33	0 51	0 38	0 43	0 14	0 57	0 40	0 48	0 65	0 41	0 40	0 31	0 7	0 11	0 14	0 13	0 17	0 12	0 55	0 38	0 15	0 12	0 8	0 16	0 7	0 27	20 17	13 14	0 32	7 8	0 43	0 37	0 25	0 31	0 46	0 34	0 23	0 24	0 43	0 47	0 44	0 26	0 28	0 31
18	16206539	G	A	0 45	0 30	0 33	0 51	0 38	0 43	0 14	0 57	0 40	0 48	0 65	0 41	0 40	0 31	0 7	0 11	0 14	0 13	0 17	0 12	0 55	0 38	0 15	0 12	0 8	0 16	0 7	0 27	0 17	1 14	0 32	0 8	0 43	0 37	0 25	0 31	0 46	0 34	0 23	0 24	0 43	0 47	0 44	0 26	0 28	0 31
18	16206547	G	T	0 48	0 28	0 28	0 52	0 39	0 45	0 13	0 62	0 44	0 48	0 64	0 43	0 41	0 32	0 5	0 10	0 14	0 15	0 18	0 12	0 58	0 40	0 19	0 14	0 8	0 16	0 8	0 27	0 41	0 33	0 32	0 14	0 38	0 35	0 26	0 28	0 46	0 39	0 22	0 26	0 43	0 42	0 45	0 26	0 28	0 34
18	16206548	C	A	0 46	0 27	0 26	0 52	0 39	0 45	0 13	0 62	0 43	0 48	0 63	0 47	0 42	0 32	0 5	0 10	0 14	0 15	0 18	0 12	0 59	0 40	0 18	0 14	0 7	0 15	0 9	0 26	0 40	0 33	0 33	0 14	0 39	0 34	0 26	0 28	0 47	0 40	0 21	0 26	0 43	0 44	0 45	0 26	0 28	0 34
18	16206558	C	A	0 39	0 28	0 31	0 55	0 37	0 46	0 14	0 63	0 48	0 49	0 59	0 47	0 44	0 33	0 8	0 11	0 13	0 20	0 16	0 16	0 57	0 36	0 19	0 15	0 8	0 15	0 13	0 26	0 42	0 33	0 28	0 13	0 40	0 34	0 23	0 25	0 45	0 35	0 19	0 21	0 39	0 41	0 43	0 23	0 27	0 36
18	16206572	T	C	0 41	0 38	0 29	0 52	0 41	0 45	0 14	0 62	0 48	0 48	0 65	0 50	0 42	0 36	0 9	0 10	0 14	0 19	0 15	0 19	0 54	0 36	0 20	0 13	0 8	0 16	0 14	0 25	0 44	0 35	0 30	0 14	0 40	0 36	0 22	0 23	0 40	0 34	0 24	0 19	0 42	0 38	0 41	0 22	0 30	0 36
18	16206574	AG	A	0 41	0 36	0 26	0 48	0 39	0 44	0 13	0 58	0 42	0 44	0 64	0 45	0 37	0 33	0 8	0 9	0 15	0 20	0 14	0 16	0 50	0 34	0 19	0 12	0 9	0 16	0 15	0 23	0 42	0 32	0 31	0 14	0 38	0 35	0 21	0 24	0 38	0 34	0 24	0 20	0 40	0 34	0 37	0 22	0 30	0 32
18	16206591	G	A	0 50	0 35	0 33	0 49	0 44	0 46	0 13	0 58	0 44	0 46	0 70	0 52	0 47	0 37	0 10	0 13	0 18	0 23	0 15	0 15	0 58	0 35	0 20	0 12	0 10	0 15	0 18	0 26	0 44	0 43	0 35	0 14	0 44	0 34	0 27	0 20	0 41	0 35	0 23	0 20	0 44	0 38	0 39	0 24	0 33	0 30
18	16206602	T	A	0 53	0 36	0 41	0 51	0 48	0 49	0 14	0 56	0 47	0 41	0 71	0 51	0 52	0 36	0 10	0 14	0 19	0 21	0 17	0 17	0 53	0 36	0 18	0 14	0 12	0 14	0 23	0 30	0 49	0 50	0 41	0 11	0 44	0 34	0 24	0 18	0 37	0 35	0 21	0 18	0 42	0 38	0 38	0 26	0 31	0 29
18	16206618	TAA	CAG	0 47	0 40	0 48	0 52	0 53	0 50	0 17	0 49	0 42	0 47	0 68	0 54	0 47	0 39	0 12	0 13	0 22	0 23	0 23	0 21	0 60	0 33	0 23	0 12	0 15	0 15	0 25	0 33	0 55	0 55	0 45	0 13	0 41	0 0	0 0	0 0	0 0	0 0	0 0	0 0	0 0	0 0	0 0	0 0	0 12	0 0
18	16206619	A	G	0 47	0 40	0 48	0 52	0 53	0 50	0 17	0 49	0 42	0 47	0 68	0 54	0 47	0 39	0 12	0 13	0 22	0 23	0 23	0 21	0 60	0 33	0 23	0 12	0 15	0 15	0 25	0 33	0 55	0 55	0 45	0 13	0 41	29 0	25 0	20 0	36 0	37 0	22 0	21 0	45 0	34 0	34 0	24 0	19 12	28 0
18	16206629	A	C	0 48	0 43	0 49	0 59	0 54	0 54	0 15	0 44	0 45	0 47	0 76	0 51	0 49	1 39	0 12	0 13	0 22	0 25	0 20	0 24	0 55	0 35	0 21	0 15	0 15	0 16	0 25	0 34	0 52	0 56	0 54	0 13	0 40	0 31	0 25	0 20	0 38	0 33	0 21	0 19	0 42	0 37	0 33	0 28	0 30	0 29
18	16206640	G	A	0 45	0 42	0 53	0 62	0 52	0 57	0 18	0 49	0 46	0 49	0 73	0 54	0 54	0 40	0 12	0 14	0 18	0 22	0 20	0 26	0 54	0 37	0 23	0 16	0 15	0 15	0 25	0 34	0 54	0 58	0 58	0 13	0 41	33 0	29 0	19 0	37 0	32 0	24 0	20 0	41 0	35 0	31 0	23 0	17 9	27 0
18	16206641	A	G	0 44	0 42	0 54	0 62	0 53	0 57	0 19	0 51	0 46	0 49	0 75	0 53	0 53	0 40	0 12	0 14	0 18	0 22	0 21	0 26	0 54	0 37	0 21	0 16	0 15	0 15	0 25	0 34	25 30	29 31	0 60	7 6	0 42	0 30	0 27	0 18	0 34	0 29	0 20	0 18	0 41	0 31	0 29	0 19	0 25	0 25
18	16206642	A	T	0 45	0 42	0 54	0 62	0 53	0 56	0 21	0 51	0 45	0 50	0 76	0 51	0 53	0 40	0 12	0 14	0 19	0 22	0 21	0 26	0 54	0 37	0 21	0 16	0 15	0 15	0 25	0 35	0 55	0 61	0 61	0 13	0 41	0 34	0 29	0 20	0 36	0 31	0 23	0 20	0 40	0 31	0 31	0 23	0 24	0 27
18	16206648	C	G	0 38	0 42	0 46	0 52	0 46	0 49	0 21	0 39	0 38	0 44	0 70	0 44	0 46	0 34	0 9	0 12	0 17	0 16	0 19	0 21	0 43	0 33	0 21	0 17	0 14	0 12	0 19	0 33	0 48	0 55	0 54	0 11	0 36	0 37	0 29	0 20	0 31	0 29	0 21	0 19	0 39	0 28	0 26	0 19	0 24	0 23
18	16206648	CAGAGGTAATA	TTACCT	0 38	0 42	0 46	0 52	0 46	0 49	0 21	0 39	0 38	0 44	0 70	0 44	0 46	0 34	0 9	0 12	0 17	0 16	0 19	0 21	0 43	0 33	0 21	0 17	0 14	0 12	0 19	0 33	0 48	0 55	0 54	0 11	0 36	0 37	0 29	0 20	0 31	0 29	0 21	0 19	0 39	0 28	0 26	0 19	0 24	0 23
18	16206659	C	A	0 44	0 49	1 50	0 61	0 54	0 56	0 22	0 49	0 42	0 52	0 76	0 47	0 54	0 41	0 9	0 16	0 22	0 16	0 21	0 24	0 48	0 40	0 24	0 18	0 14	0 13	0 21	0 37	0 56	0 63	0 55	0 11	0 47	0 37	0 29	0 26	19 14	15 16	0 22	0 20	0 44	0 35	0 26	0 22	0 25	0 27
18	16206677	A	G	0 41	0 48	0 58	0 60	0 67	0 57	0 25	0 58	0 41	0 57	0 76	0 45	0 53	0 41	0 6	0 17	0 19	0 15	0 20	0 26	0 52	0 37	0 26	0 17	0 14	0 13	0 21	0 41	0 50	1 66	0 58	0 11	0 48	0 35	0 26	0 20	0 35	0 29	0 19	0 21	0 42	0 33	0 26	0 23	0 21	0 30
18	16206679	C	T	0 41	0 49	0 55	0 63	0 67	0 58	0 25	0 57	0 41	0 58	0 78	0 44	0 53	0 43	0 5	0 16	0 18	0 14	0 24	0 27	0 51	0 38	0 27	0 17	0 14	0 12	0 22	0 42	21 28	33 37	0 57	7 4	0 49	0 30	0 25	0 21	0 32	0 29	0 18	0 21	0 41	0 33	0 23	0 23	0 21	0 32
18	16206701	TTCTTTTTTTCAAA	T	0 34	0 49	0 46	0 47	0 52	0 47	0 15	0 46	0 39	0 41	0 66	0 32	0 39	0 13	0 5	0 13	0 15	0 6	0 14	0 20	0 40	0 12	0 19	0 14	0 10	0 13	0 16	0 24	0 37	0 52	0 39	0 9	0 40	0 0	0 0	0 0	0 0	0 0	0 0	0 0	0 0	0 0	0 0	0 0	0 7	0 0
18	16206703	CT	C	0 34	0 49	0 46	0 47	0 52	0 47	0 15	0 46	0 39	0 41	0 66	0 32	0 39	0 13	0 5	0 13	0 15	0 6	0 14	0 20	0 40	0 12	0 19	0 14	0 10	0 13	0 16	0 24	0 37	0 52	0 39	0 9	0 40	25 0	25 0	17 0	31 0	21 0	19 0	18 0	42 0	26 0	23 0	22 0	13 7	24 0
18	16206703	C	CT	0 34	0 49	0 46	0 47	0 52	0 47	0 15	0 46	0 39	0 41	0 66	0 32	0 39	20 13	0 5	0 13	0 15	0 6	0 14	0 20	0 40	0 12	0 19	0 14	0 10	0 13	0 16	0 24	0 37	0 52	0 39	0 9	0 40	0 0	0 0	0 0	0 0	0 0	0 0	0 0	0 0	0 0	0 0	0 0	0 7	0 0
18	16206710	T	A	0 34	0 49	0 46	0 47	0 52	0 47	0 15	0 46	0 39	0 41	0 66	0 32	0 39	0 13	0 5	0 13	0 15	0 6	0 14	0 20	0 40	17 12	0 19	0 14	0 10	0 13	0 16	0 24	0 37	0 52	0 39	0 9	0 40	0 0	0 0	0 0	0 0	0 0	0 0	0 0	0 0	0 0	0 0	0 0	0 7	0 0
18	16206711	CAAA	TCAAT	0 34	0 49	0 46	0 47	0 52	0 47	0 15	0 46	0 39	0 41	0 66	0 32	0 39	0 13	0 5	0 13	0 15	0 6	0 14	0 20	0 40	0 12	0 19	0 14	0 10	0 13	0 16	0 24	0 37	0 52	0 39	0 9	0 40	0 0	0 0	0 0	0 0	0 0	0 0	0 0	0 0	0 0	0 0	0 0	0 7	0 0
18	16206719	C	T	0 39	0 53	0 55	0 60	0 61	0 60	0 18	0 60	0 47	0 43	0 73	0 38	0 44	0 39	0 7	0 15	0 17	0 15	0 15	0 22	0 48	0 32	0 26	0 16	0 9	0 21	0 21	0 36	0 47	0 60	0 56	0 9	0 51	28 0	28 0	21 0	36 0	24 0	18 0	18 0	40 2	32 0	22 0	27 0	17 7	28 0
18	16206725	A	T	0 41	0 52	0 57	0 59	0 60	0 58	0 19	0 63	0 44	0 42	0 69	0 36	0 47	0 41	0 7	0 16	0 17	0 16	0 16	0 25	0 47	0 36	0 26	0 16	0 12	0 22	0 23	0 36	0 45	0 57	0 56	0 9	0 52	0 28	0 29	0 23	19 17	12 14	0 19	0 20	0 38	0 30	0 21	0 25	0 21	0 27
18	16206747	G	C	0 47	0 53	0 58	0 53	0 61	0 54	0 18	0 55	0 41	0 35	0 72	0 36	0 49	0 34	0 8	0 16	0 15	0 17	0 16	0 25	0 53	0 40	0 21	0 11	0 11	0 19	0 30	0 35	40 0	60 0	0 55	8 0	0 55	29 0	26 0	25 0	30 0	30 0	24 0	15 0	38 0	32 0	20 0	22 0	26 0	33 0
18	16206754	G	C	0 47	1 52	0 58	0 51	0 62	0 55	0 19	0 53	0 41	0 35	1 72	0 34	0 52	0 35	0 7	0 15	0 17	0 17	0 15	0 25	0 55	0 39	0 21	0 13	0 11	0 19	0 29	0 39	0 39	0 57	0 55	0 8	0 55	0 30	0 28	0 26	0 33	0 31	0 23	0 17	0 38	0 30	0 22	0 23	0 26	0 34
18	16206785	T	C	0 46	0 47	0 56	0 52	25 25	0 45	8 7	0 48	0 40	0 35	0 76	0 34	0 59	0 37	0 9	0 13	0 20	0 19	0 20	0 20	0 48	0 41	0 20	0 19	0 12	0 20	0 30	0 31	0 46	0 46	0 51	0 9	0 50	0 31	0 25	0 29	0 28	0 33	0 21	0 15	0 43	0 36	0 19	0 24	0 35	0 31
18	16206789	A	C	0 46	0 47	0 59	0 51	0 50	0 47	0 16	0 51	0 40	0 35	0 74	0 36	0 57	0 38	0 8	0 14	0 20	0 19	0 21	0 21	0 49	0 42	0 19	0 22	0 11	0 17	0 29	0 30	0 12	0 19	26 25	0 5	0 29	0 32	0 22	0 24	0 28	0 35	0 21	0 15	0 43	0 35	0 18	0 22	0 35	0 30
18	16206789	A	G	0 46	0 47	0 59	0 51	0 50	0 47	0 16	0 51	0 40	0 35	0 74	0 36	0 57	0 38	0 8	0 14	0 20	0 19	0 21	0 21	0 49	0 42	0 19	0 22	0 11	0 17	0 29	0 30	33 12	25 19	0 25	4 5	23 29	0 32	0 22	0 24	0 28	0 35	0 21	0 15	0 43	0 35	0 18	0 22	0 35	0 30
18	16206792	T	C	0 46	0 47	0 60	0 50	0 50	0 45	0 16	0 53	0 40	0 35	0 69	0 37	0 58	0 39	0 8	0 13	0 20	0 19	0 21	0 19	0 52	0 40	0 20	0 21	0 11	0 15	0 29	0 30	12 34	0 44	0 50	0 8	0 51	0 34	0 24	0 30	0 30	0 35	0 22	0 17	0 41	0 34	0 19	0 23	0 38	0 31
18	16206795	GAC	TAT	0 44	0 44	0 58	0 50	0 49	0 48	0 14	0 55	0 34	0 34	0 74	0 36	0 59	0 39	0 8	0 14	0 20	0 19	0 21	0 19	0 53	0 39	0 21	0 19	0 12	0 17	0 27	0 29	0 45	0 42	0 51	0 9	0 52	0 30	0 25	0 29	0 32	0 34	0 20	0 17	0 43	0 35	0 18	0 25	0 37	0 30
18	16206807	C	A	0 49	0 40	0 57	0 52	0 49	0 51	0 17	0 53	0 30	0 37	0 68	0 34	0 59	0 39	0 9	0 16	0 17	0 20	0 22	0 19	0 53	0 44	0 21	0 19	0 12	0 17	0 30	0 29	0 43	0 43	0 36	0 9	22 24	0 30	0 26	0 27	0 33	0 34	0 24	0 18	0 39	0 27	0 20	0 28	0 36	0 29
18	16206812	A	G	0 47	0 41	0 55	0 48	0 50	0 46	0 15	0 55	0 32	0 38	0 66	0 36	0 59	0 42	0 8	0 15	0 17	0 17	0 22	0 18	0 55	0 43	0 22	0 20	0 13	0 16	0 30	0 24	0 42	0 42	0 32	0 7	0 44	27 0	24 0	24 0	30 0	34 0	23 0	18 0	37 0	27 0	21 0	27 0	25 11	27 0
18	16206822	C	T	0 43	0 40	0 52	0 38	0 49	0 42	0 18	0 53	0 33	0 37	0 72	0 39	0 58	0 34	0 9	0 14	0 22	0 15	0 21	0 17	0 56	0 43	0 22	0 20	0 11	0 16	0 30	0 25	0 41	0 41	0 29	0 7	0 44	29 0	21 0	28 0	29 0	35 0	27 0	17 0	34 0	30 0	22 0	29 0	24 12	25 0
18	16206840	C	G	0 40	0 39	0 46	0 38	0 44	0 44	0 19	0 57	0 31	0 37	0 62	0 36	0 52	0 37	0 9	0 14	0 19	0 13	0 22	0 16	0 55	0 38	0 21	0 21	0 10	0 17	0 28	0 24	0 45	0 40	0 30	0 7	0 45	0 33	0 30	0 29	0 31	0 38	0 27	0 16	0 32	0 28	0 22	0 27	0 36	0 27
18	16206848	C	CA	0 37	0 35	0 45	0 38	0 48	0 44	0 20	0 56	0 30	0 39	0 62	0 33	0 46	0 39	0 9	0 13	0 20	0 12	0 20	0 20	0 55	0 35	0 21	0 18	0 8	0 18	0 25	0 19	23 13	24 18	0 30	4 3	24 21	0 32	0 28	0 28	0 29	0 37	0 26	0 17	0 29	0 31	0 24	0 29	0 35	0 28
18	16206860	T	C	0 40	0 40	0 42	0 41	0 47	0 45	0 19	0 56	0 35	0 41	0 62	0 38	0 44	0 38	0 9	0 12	0 17	0 12	0 18	0 23	0 61	0 37	0 21	0 15	0 8	0 18	0 24	0 21	0 37	0 44	0 30	0 7	22 22	0 33	0 27	0 24	0 30	0 33	0 25	0 17	0 31	0 31	0 25	0 28	0 36	2 30
18	16206865	A	AACCGTT	0 35	0 34	0 37	0 38	0 39	0 43	0 17	0 55	0 30	0 38	0 57	0 39	0 38	0 32	0 8	0 11	0 14	0 11	0 16	0 20	0 54	14 16	0 20	0 14	0 5	0 17	0 20	0 22	28 0	30 0	19 0	5 0	17 24	26 0	20 0	19 0	22 0	25 0	20 0	12 1	27 2	22 0	22 0	25 1	23 0	26 0
18	16206867	TGCCA	CCGTTATGCCG	0 35	0 34	0 37	0 38	0 39	0 43	0 17	0 55	0 30	0 38	0 57	0 39	0 38	0 32	0 8	0 11	0 14	0 11	0 16	0 20	0 54	0 16	0 20	0 14	0 5	0 17	0 20	0 22	0 0	0 0	0 0	0 0	0 24	0 0	0 0	0 0	0 0	0 0	0 0	0 1	0 2	0 0	0 0	0 1	0 0	0 0
18	16206892	G	T	0 37	0 33	0 33	0 46	0 52	0 46	0 19	0 50	0 33	0 35	0 56	0 35	0 33	0 25	0 7	0 12	0 18	0 9	0 16	0 21	0 53	0 27	0 25	0 20	0 9	0 20	0 21	0 25	0 36	0 41	0 32	0 10	0 46	0 27	0 23	0 23	0 33	0 29	0 24	0 16	0 31	0 27	0 37	0 31	0 30	0 25
18	16206900	A	G	20 17	17 18	19 15	23 25	19 30	23 23	11 8	49 0	37 0	35 0	53 0	37 0	15 12	22 0	8 0	12 0	9 12	3 4	8 8	21 0	53 0	11 14	25 0	18 0	10 0	16 0	19 0	24 0	37 0	42 0	33 0	11 0	47 0	29 0	26 0	28 0	33 0	32 0	23 0	17 0	34 0	28 0	39 0	30 0	29 0	25 0
18	16206900	A	T	0 17	0 18	0 15	0 25	0 30	0 23	0 8	0 0	0 0	0 0	0 0	0 0	0 12	0 0	0 0	0 0	0 12	0 4	0 8	0 0	0 0	0 14	0 0	0 0	0 0	0 0	0 0	0 0	0 0	0 0	0 0	0 0	0 0	0 0	0 0	0 0	0 0	0 0	0 0	0 0	0 0	0 0	0 0	0 0	0 0	0 0
18	16206910	C	T	0 44	0 34	0 33	0 53	1 48	0 41	0 21	0 44	0 35	0 36	0 54	0 36	0 30	0 21	0 5	0 13	0 19	0 6	0 12	0 20	0 49	0 24	0 22	0 19	0 11	0 17	0 20	0 25	0 39	0 39	0 34	0 11	0 44	0 29	0 25	0 23	0 33	0 31	0 26	0 19	0 35	0 27	0 39	0 26	0 29	0 26
18	16206911	G	A	0 47	0 32	0 35	0 53	0 51	0 39	0 21	0 44	0 35	0 36	0 55	0 37	0 30	0 22	0 5	0 13	0 19	0 6	0 11	0 20	0 50	0 24	0 21	0 19	0 11	0 16	0 19	0 24	0 38	18 22	0 36	5 6	0 44	0 30	0 25	0 23	0 32	0 31	0 26	0 18	0 34	0 27	0 38	0 26	0 30	0 25
18	16206923	A	G	0 50	0 31	0 39	0 55	0 53	0 42	0 22	0 45	0 34	0 38	0 53	0 37	0 31	0 23	0 4	0 14	0 18	0 8	0 16	0 25	0 49	0 22	0 20	0 20	0 11	0 16	0 20	0 26	0 32	0 37	0 38	0 10	0 43	0 32	0 26	0 25	0 35	0 31	0 26	0 19	0 30	0 24	0 40	0 28	0 29	0 26
18	16206925	A	ACTTT	0 46	0 28	0 38	0 48	0 50	0 40	0 17	0 39	0 31	0 34	0 51	0 33	0 29	0 22	0 3	0 13	0 17	0 8	0 14	0 22	0 46	0 20	0 17	0 16	0 10	0 13	0 20	0 24	0 29	0 29	0 31	0 11	0 33	0 25	0 23	0 26	0 32	0 26	0 26	0 18	0 26	0 22	0 39	0 27	0 25	0 25
18	16206942	G	A	0 52	0 34	0 44	0 54	0 53	0 40	0 19	0 48	0 36	0 36	0 59	0 41	0 29	0 25	0 4	0 14	0 17	0 10	0 19	0 18	0 50	0 21	0 19	0 21	0 12	0 13	0 20	0 28	0 36	0 33	0 33	0 10	0 33	0 27	0 28	0 25	0 33	0 27	0 25	0 17	0 27	0 24	0 40	0 29	0 25	0 30
18	16206945	G	A	0 52	0 33	0 44	0 57	0 53	0 41	0 19	0 48	0 37	0 35	0 57	0 42	0 28	0 25	0 4	0 14	0 17	0 10	0 20	0 17	0 49	0 19	0 18	0 22	0 13	0 14	0 21	0 30	0 39	0 34	0 32	0 13	0 32	27 0	29 0	25 0	33 0	27 0	24 0	15 0	28 0	26 0	39 0	29 0	8 16	29 0
18	16206952	A	G	0 53	0 31	0 45	0 57	0 53	0 45	0 20	0 53	0 38	0 37	0 56	0 43	0 27	0 21	0 5	0 15	0 18	0 8	0 18	0 19	0 50	0 21	0 18	0 23	0 16	0 13	0 23	0 28	0 39	19 17	0 35	4 7	0 30	0 30	0 28	0 25	0 30	0 26	0 23	0 15	0 28	0 29	0 39	0 28	0 24	0 30
18	16206957	A	C	0 52	0 29	0 46	0 56	0 50	0 43	0 21	0 53	0 39	0 33	0 57	0 41	1 27	0 21	0 5	0 16	0 18	0 10	0 19	0 17	0 48	0 20	0 20	0 24	0 15	0 12	0 24	0 28	0 41	20 17	0 35	5 8	0 32	0 31	0 26	0 23	0 30	0 24	0 21	0 15	0 29	0 29	0 40	0 27	0 24	0 32
18	16206960	C	A	0 53	0 29	0 44	0 57	0 53	0 43	0 24	0 55	0 36	0 34	0 61	0 42	0 31	0 21	0 6	0 17	0 19	0 10	0 21	0 16	0 47	0 21	0 18	0 28	0 16	0 11	0 28	0 28	0 18	0 20	0 41	0 5	0 35	0 30	0 28	0 25	0 31	0 24	0 23	0 16	0 28	0 28	0 42	0 28	0 25	0 34
18	16206960	C	T	0 53	0 29	0 44	0 57	0 53	0 43	0 24	0 55	0 36	0 34	0 61	0 42	0 31	0 21	0 6	0 17	0 19	0 10	0 21	0 16	0 47	0 21	0 18	0 28	0 16	0 11	0 28	0 28	24 18	18 20	0 41	8 5	0 35	0 30	0 28	0 25	0 31	0 24	0 23	0 16	0 28	0 28	0 42	0 28	0 25	0 34
18	16206972	A	T	0 52	0 29	0 46	0 63	0 57	0 43	0 24	0 53	0 39	0 39	0 64	0 37	0 32	0 23	0 6	0 17	0 18	0 11	0 20	0 17	0 49	11 11	0 21	0 31	0 15	0 9	0 28	0 31	0 44	0 41	0 37	0 13	0 38	0 27	0 23	0 20	0 29	0 24	0 22	0 15	0 29	0 29	0 45	0 29	0 26	0 31
18	16206974	T	C	0 52	0 30	0 45	0 61	0 59	0 42	0 24	0 52	0 38	0 40	0 64	0 35	0 32	0 23	0 6	0 17	0 19	0 13	0 20	0 17	0 49	0 21	0 21	0 30	0 18	0 9	0 27	0 30	0 44	0 42	0 37	0 13	0 39	0 29	0 22	0 22	0 29	0 25	0 24	0 14	0 31	0 30	0 44	0 30	0 26	0 32
18	16206980	A	T	0 52	0 32	0 46	0 63	0 56	0 44	0 25	0 52	0 36	0 37	0 59	0 36	0 34	0 23	0 6	0 17	0 17	0 14	0 20	0 18	0 47	0 25	0 19	0 31	0 17	0 9	0 25	0 29	0 45	20 20	0 39	5 8	0 39	0 27	0 19	0 23	0 31	0 27	0 22	0 16	0 30	0 31	0 50	0 30	0 29	0 33
18	16206993	T	A	0 48	0 35	0 49	0 60	0 51	0 44	0 26	0 54	0 41	0 36	0 65	0 39	0 35	0 31	0 6	0 20	0 12	0 17	0 18	0 19	0 47	0 27	0 18	1 31	0 19	0 9	0 27	0 31	0 50	0 44	0 45	0 13	0 38	0 27	0 24	0 24	0 33	0 31	0 22	0 19	0 29	0 30	0 46	0 29	0 27	0 31
18	16207005	G	A	0 47	0 39	0 48	0 59	0 53	0 46	0 24	0 53	0 40	0 41	0 64	0 36	0 37	0 32	0 8	0 22	0 16	0 19	0 18	0 21	0 49	0 38	0 20	0 32	0 21	0 11	0 27	0 30	0 51	0 51	0 43	0 13	0 41	0 27	0 24	0 24	0 32	0 30	0 25	0 20	0 30	0 29	0 43	0 33	0 28	0 30
18	16207005	G	C	0 47	0 39	0 48	0 59	0 53	0 46	0 24	0 53	0 40	0 41	0 64	0 36	0 37	0 32	0 8	0 22	0 16	0 19	0 18	0 21	0 49	0 38	0 20	0 32	0 21	0 11	0 27	0 30	0 51	0 51	0 43	0 13	0 41	0 27	0 24	0 24	0 32	0 30	0 25	0 20	0 30	0 29	0 43	0 33	0 28	0 30
18	16207011	G	A	0 45	0 40	0 49	0 56	0 50	0 42	0 24	0 53	0 38	0 36	0 65	0 36	0 43	0 33	0 9	0 23	0 19	0 17	0 17	0 21	0 51	0 41	0 20	0 32	0 20	0 11	0 28	0 29	24 25	28 25	0 46	4 8	0 43	0 27	0 23	0 24	0 31	0 28	0 25	0 22	0 31	0 32	0 43	0 33	0 29	0 30
18	16207019	T	G	0 44	0 42	0 52	0 55	0 45	0 44	0 24	0 50	0 38	0 39	0 65	0 36	0 41	0 35	0 9	0 23	0 20	0 18	0 18	0 22	0 49	0 42	0 21	0 33	0 20	0 8	0 30	0 30	0 45	0 56	0 45	0 13	0 45	0 27	0 24	0 22	0 28	0 28	0 23	0 22	0 32	0 30	0 41	0 34	0 29	0 30
18	16207029	C	A	0 43	0 43	0 47	0 55	0 48	0 44	0 24	0 50	0 39	0 41	0 63	0 37	0 42	0 37	0 9	0 21	0 22	0 17	0 15	0 21	0 50	0 43	0 18	0 33	0 20	0 9	0 28	0 31	0 50	0 60	0 49	0 12	0 47	0 26	0 25	0 21	0 27	0 27	0 23	0 22	0 32	0 30	0 41	0 35	0 28	0 31
18	16207039	G	T	0 44	0 43	0 46	0 56	0 48	0 46	0 24	0 46	0 37	0 40	0 65	1 36	0 45	0 38	0 8	0 20	0 25	0 20	0 16	0 23	0 53	0 44	0 20	0 33	0 21	0 9	0 26	0 30	20 30	28 31	0 51	9 5	25 20	0 24	0 25	0 22	0 30	0 29	0 24	0 21	0 32	0 30	0 37	0 36	0 28	0 30
18	16207043	T	C	0 42	20 21	0 48	0 57	0 49	0 47	0 22	0 44	0 38	0 40	0 65	0 39	0 46	0 37	0 8	0 20	0 26	0 25	0 16	0 24	0 51	0 43	0 20	0 30	0 21	0 10	0 25	0 30	0 47	0 57	0 48	0 14	0 46	0 23	0 26	0 20	0 31	0 28	0 23	0 23	0 37	0 32	0 35	0 36	0 25	0 30
18	16207057	G	A	0 38	0 49	0 48	0 57	0 51	0 42	0 25	0 42	0 37	0 40	0 61	0 40	0 49	0 39	0 7	0 20	0 27	0 23	0 15	0 29	0 54	0 44	0 21	0 28	0 18	0 12	0 25	0 27	0 43	0 53	0 44	0 14	0 53	0 27	0 25	0 18	0 32	0 27	0 25	0 20	0 34	0 31	0 32	0 36	0 24	0 31
18	16207065	G	A	0 43	1 51	0 48	0 57	0 49	0 42	0 26	0 39	0 40	0 39	0 60	0 39	0 50	0 36	0 6	0 20	0 25	0 24	0 15	0 28	0 53	0 42	0 20	0 28	0 21	0 13	0 28	0 28	32 15	0 55	0 40	0 17	0 48	0 26	0 27	0 19	0 32	0 28	0 26	0 20	0 34	0 32	0 33	0 38	0 23	0 31
18	16207070	G	GGTAC	0 43	0 51	0 47	0 51	0 43	0 44	0 25	0 35	0 41	0 38	0 56	0 38	0 52	0 35	0 8	0 20	0 25	0 24	0 14	0 28	0 52	0 41	0 21	0 24	0 18	0 11	0 27	0 25	0 46	0 57	0 39	0 16	0 49	0 23	0 24	0 12	0 29	0 27	0 24	0 21	0 35	0 31	0 36	0 36	0 21	0 27
18	16207085	ATAACC	A	0 47	0 51	0 45	0 50	0 42	0 40	0 21	0 29	0 36	0 47	0 58	0 38	0 51	0 32	0 8	0 20	0 27	0 20	0 22	0 27	0 51	0 44	0 20	0 25	0 16	0 15	0 24	0 22	0 31	0 28	0 43	0 4	0 27	0 22	0 21	0 13	0 29	0 28	0 28	0 23	0 36	0 31	0 36	0 38	0 21	0 28
18	16207089	C	T	0 47	0 51	0 45	0 50	0 42	0 40	0 21	0 29	0 36	0 47	0 58	0 38	0 51	0 32	0 8	0 20	0 27	0 20	0 22	0 27	0 51	0 44	0 20	0 25	0 16	0 15	0 24	0 22	12 31	18 28	0 43	12 4	17 27	0 22	0 21	0 13	0 29	0 28	0 28	0 23	0 36	0 31	0 36	0 38	0 21	0 28
18	16207097	T	G	0 48	0 53	0 55	0 53	0 48	0 47	0 22	0 32	0 40	0 49	0 65	0 47	0 56	0 32	0 8	0 20	0 26	0 19	0 23	0 27	0 55	0 41	0 18	0 29	0 16	0 14	0 21	0 22	0 49	0 50	0 49	0 16	0 48	0 22	0 22	0 16	0 32	0 29	0 32	0 25	0 36	0 31	0 38	0 41	0 23	0 31
18	16207104	A	C	0 49	0 50	0 50	0 53	0 48	0 46	0 23	0 33	0 39	0 48	0 65	0 47	0 57	0 34	0 7	0 18	0 27	0 22	0 23	0 31	0 52	0 40	0 19	0 30	0 15	0 15	0 22	0 22	0 50	0 49	0 51	0 15	0 47	0 21	0 23	0 16	0 32	0 29	0 33	0 24	0 39	0 30	0 38	0 37	0 24	0 33
18	16207111	T	G	0 46	0 48	0 47	0 52	0 49	0 49	0 22	0 31	0 44	0 52	0 67	0 48	0 54	0 33	0 6	0 17	0 24	0 22	0 25	0 31	0 49	0 38	0 20	0 30	0 16	0 14	0 21	0 24	0 47	0 49	0 52	0 15	0 46	0 23	0 21	0 14	0 32	0 29	0 32	0 24	0 38	0 31	0 34	0 40	0 24	0 35
18	16207115	A	T	0 47	0 48	0 45	0 52	0 50	0 49	0 20	0 29	0 46	0 52	0 69	0 48	0 54	0 33	0 5	0 17	0 23	0 23	0 22	0 31	0 50	0 36	0 20	0 29	0 16	0 14	0 20	0 23	0 49	0 47	0 51	0 15	0 47	0 24	0 21	0 14	0 34	0 29	0 31	0 22	0 40	0 30	0 34	0 42	9 14	0 37
18	16207118	GT	AG	0 45	0 48	0 44	0 50	0 53	0 49	0 19	0 29	0 45	0 50	0 68	0 48	0 56	0 32	0 6	0 16	0 24	0 23	0 22	0 31	0 50	0 35	0 19	0 28	0 16	0 14	0 21	0 22	0 46	0 44	0 51	0 15	0 48	0 25	0 23	0 15	0 34	0 26	0 33	0 23	0 41	0 29	0 36	0 41	0 23	0 38
18	16207123	T	C	0 44	0 44	0 45	0 49	0 59	0 51	0 21	0 32	0 43	0 48	0 66	0 49	0 52	0 31	0 6	0 16	0 24	0 23	0 21	0 31	0 50	0 34	0 19	0 30	0 18	0 15	0 21	0 20	0 47	0 51	0 49	0 15	0 50	0 26	0 22	0 17	0 34	0 23	0 28	0 24	0 35	0 28	0 33	0 40	0 23	0 39
18	16207143	A	C	0 43	0 44	0 44	0 43	0 59	0 50	0 18	0 35	1 38	0 47	0 60	0 49	0 59	0 27	0 6	0 18	0 23	0 20	0 23	0 32	0 50	0 38	0 16	0 27	0 14	0 15	0 23	0 19	0 46	0 44	0 53	0 13	0 44	0 27	0 22	0 14	0 32	0 22	0 31	0 21	0 40	0 28	0 28	0 41	0 23	0 40
18	16207154	T	TTAA	0 42	0 38	0 41	0 37	0 55	0 52	0 17	0 35	0 32	0 41	0 56	0 44	0 53	0 25	0 4	0 15	0 20	0 19	0 22	0 26	0 44	0 36	0 16	0 28	0 11	0 12	0 19	0 18	0 36	0 19	0 50	0 8	0 37	0 29	0 18	0 17	0 33	0 24	0 30	0 22	0 38	0 28	0 32	0 37	0 24	0 36
18	16207157	T	G	0 42	0 38	0 41	0 37	0 55	0 52	0 17	0 35	0 32	0 41	0 56	0 44	0 53	0 25	0 4	0 15	0 20	0 19	0 22	0 26	0 44	0 36	0 16	0 28	0 11	0 12	0 19	0 18	0 36	19 19	0 50	4 8	0 37	0 29	0 18	0 17	0 33	0 24	0 30	0 22	0 38	0 28	0 32	0 37	0 24	0 36
18	16207167	C	T	0 40	0 36	0 46	0 37	0 59	0 56	0 23	19 22	18 18	0 40	0 53	0 46	0 49	0 23	0 5	0 18	0 22	0 23	0 21	0 26	0 47	0 36	0 20	0 29	0 12	6 6	0 20	0 19	0 39	0 45	0 47	0 11	0 43	0 27	0 21	0 18	0 33	0 25	0 28	0 23	0 37	0 26	0 32	0 35	0 25	0 36
18	16207170	C	T	0 38	0 38	0 49	0 38	0 63	0 53	0 22	0 42	0 34	0 40	0 49	0 46	0 47	0 24	0 4	0 17	0 23	0 22	0 20	0 26	0 44	0 37	0 19	0 27	0 11	0 12	0 21	0 21	0 39	0 46	0 46	0 11	0 42	0 28	0 19	0 18	0 33	0 25	0 27	0 24	0 39	0 27	0 30	0 35	12 14	0 36
18	16207185	A	T	0 36	0 31	0 47	0 32	32 29	0 54	14 12	0 40	0 31	0 32	0 48	0 47	0 42	0 22	0 4	0 13	0 19	0 18	0 14	0 25	0 46	0 34	0 19	0 24	0 14	0 10	0 16	0 21	0 38	0 45	0 41	0 11	0 47	0 29	0 18	0 17	0 31	0 25	0 27	0 27	0 35	0 25	0 30	0 33	0 30	0 38
18	16207191	CA	C	0 34	0 25	0 40	0 35	0 54	0 48	0 26	0 39	0 28	0 30	0 44	0 45	0 38	0 21	0 4	0 14	0 17	0 21	0 15	0 27	0 47	0 32	0 18	0 23	0 15	0 10	0 18	0 18	21 12	21 22	0 30	7 3	0 45	0 13	0 8	0 19	0 26	0 26	0 12	0 14	0 30	0 23	0 26	0 32	0 29	0 41
18	16207194	T	C	0 34	0 25	0 40	0 35	0 54	0 48	0 26	0 39	0 28	0 30	0 44	0 45	0 38	0 21	0 4	0 14	0 17	0 21	0 15	0 27	0 47	0 32	0 18	0 23	0 15	0 10	0 18	0 18	0 12	0 22	0 30	0 3	0 45	10 13	10 8	0 19	0 26	0 26	12 12	12 14	0 30	0 23	0 26	0 32	0 29	0 41
18	16207201	C	T	0 32	0 25	0 44	0 34	0 54	0 47	0 26	0 39	0 28	0 28	0 48	0 45	0 39	0 19	0 6	0 12	0 18	0 18	0 16	0 30	0 51	0 31	0 16	0 22	0 14	0 8	0 17	0 20	0 39	0 42	0 26	0 11	0 48	0 25	0 20	0 19	0 29	0 25	0 25	0 25	0 30	0 22	0 25	0 38	0 29	0 42
18	16207205	G	C	0 32	0 24	0 45	0 37	0 52	0 45	0 27	0 38	0 26	0 25	0 45	0 43	0 35	0 20	0 6	0 11	0 17	0 18	0 16	0 25	0 53	0 31	0 18	0 22	0 13	0 11	0 16	0 17	0 36	0 43	0 26	0 10	0 50	0 25	0 20	0 19	0 29	0 26	0 26	0 26	0 29	0 21	0 25	0 39	0 30	0 43
18	16207218	C	A	0 30	0 19	0 46	0 33	24 22	0 38	15 13	15 23	12 9	0 22	0 39	0 37	0 30	12 9	0 4	0 16	0 17	0 18	6 6	14 14	0 51	20 13	0 17	0 22	1 14	7 7	5 12	0 17	30 0	45 0	21 0	11 0	17 23	28 0	21 0	21 0	28 0	25 0	24 0	30 0	29 0	21 0	27 0	39 0	30 0	45 0
18	16207225	C	G	0 29	0 19	0 43	0 34	0 42	0 36	0 26	0 35	0 21	0 20	0 39	0 38	0 31	0 22	0 4	0 15	9 8	7 10	0 12	14 14	0 50	0 32	17 0	23 0	14 1	7 8	5 9	8 8	0 29	0 44	0 19	0 11	0 37	0 30	0 21	0 23	0 28	0 24	0 24	0 30	0 31	0 21	0 27	0 38	0 29	0 45
18	16207232	G	A	0 30	0 19	0 44	0 32	0 46	0 31	0 25	0 36	0 21	0 18	0 37	0 36	0 28	0 20	0 4	0 13	0 16	0 18	0 12	0 25	0 49	0 30	0 18	0 22	0 16	0 14	0 15	0 15	0 28	0 42	0 16	0 11	0 38	0 28	0 19	0 22	0 29	0 26	0 21	0 25	0 32	0 21	0 29	0 36	0 29	0 45
18	16207240	G	GGCTT	0 24	0 17	0 40	0 37	0 38	0 25	0 22	0 33	0 21	0 19	0 35	0 32	0 24	0 19	0 5	0 12	0 11	0 15	0 12	0 24	0 47	0 26	0 16	0 20	0 16	0 14	0 13	0 13	0 27	0 36	0 16	0 11	0 36	0 33	0 20	0 20	0 26	0 27	0 18	0 23	0 34	0 21	0 29	0 32	10 16	0 40
18	16207253	C	T	0 25	0 21	0 40	0 38	0 39	0 21	0 20	0 35	0 24	0 21	0 34	0 32	0 23	0 20	0 5	0 13	0 10	0 17	0 16	0 24	0 47	0 27	0 16	0 19	0 19	0 15	0 12	0 12	20 12	22 13	0 24	8 3	0 34	0 32	0 23	0 20	0 28	0 27	0 16	0 23	0 30	0 22	0 31	0 34	0 25	0 40
18	16207254	AC	GG	0 25	0 20	0 41	0 37	0 37	0 21	0 18	0 34	0 24	0 20	0 35	0 32	0 23	0 20	0 5	0 12	0 9	0 16	0 15	0 24	0 46	0 26	0 15	0 18	0 19	0 15	0 11	0 12	0 28	0 34	0 24	0 11	0 36	0 33	0 23	0 19	0 27	0 27	0 16	0 24	0 30	0 21	0 31	0 35	0 25	0 40
18	16207255	C	G	0 25	0 20	0 41	0 37	0 37	0 21	0 18	0 34	0 24	0 20	0 35	0 32	0 23	0 20	0 5	0 12	0 9	0 16	0 15	0 24	0 46	0 26	0 15	0 18	0 19	0 15	0 11	0 12	0 28	0 34	0 24	0 11	0 36	0 33	0 23	0 19	0 27	0 27	0 16	0 24	0 30	0 21	0 31	0 35	0 25	0 40
18	16207260	C	A	0 24	0 21	0 34	0 34	0 32	0 19	0 13	0 30	0 22	0 19	0 35	0 25	0 23	0 20	0 5	0 10	0 10	0 15	0 16	0 24	0 46	0 26	0 14	0 21	0 18	0 15	0 11	0 13	0 33	0 30	0 24	0 10	11 20	31 0	22 0	19 0	28 0	28 0	21 0	24 0	28 0	23 0	32 0	32 0	23 0	36 0
18	16207260	C	CATG	0 24	0 21	0 34	0 34	0 32	0 19	0 13	0 30	0 22	0 19	0 35	0 25	0 23	0 20	0 5	0 10	0 10	0 15	0 16	0 24	0 46	0 26	0 14	0 21	0 18	0 15	0 11	0 13	0 33	0 30	0 24	0 10	0 20	0 0	0 0	0 0	0 0	0 0	0 0	0 0	0 0	0 0	0 0	0 0	0 0	0 0
18	16207266	T	C	0 24	0 21	0 34	0 37	0 32	0 19	0 14	0 31	0 22	0 19	0 34	0 29	0 27	0 20	0 5	0 13	0 10	0 14	0 15	0 24	0 51	0 27	0 17	0 23	0 18	0 15	0 13	0 14	0 39	0 31	0 25	0 10	0 33	13 18	12 11	0 22	0 28	0 27	8 13	13 12	0 29	0 24	0 30	0 36	0 23	0 40
18	16207269	A	G	0 24	0 20	0 31	0 39	0 30	0 17	0 14	0 31	0 20	0 19	0 34	0 29	0 27	0 20	0 5	0 15	0 11	0 13	0 16	0 23	0 50	0 25	0 16	0 24	0 18	0 15	0 12	0 12	0 38	0 30	0 24	0 9	0 33	0 31	0 22	0 24	0 28	0 31	0 21	0 25	0 31	0 22	0 29	0 33	0 24	0 37
18	16207273	C	T	0 22	0 20	0 30	0 40	0 30	0 19	0 12	0 29	0 20	0 20	0 35	0 27	0 25	0 21	0 6	0 15	0 11	0 13	0 14	0 22	0 49	0 27	0 17	0 22	0 17	0 15	0 14	0 14	23 13	21 9	0 23	7 3	0 31	0 29	0 20	0 19	0 29	0 30	0 19	0 24	0 28	0 19	0 27	0 28	0 23	0 34
18	16207275	A	C	0 23	0 20	0 28	0 38	0 30	0 19	0 12	0 30	0 19	0 20	0 37	0 27	0 24	0 21	0 7	0 15	0 11	0 13	0 15	0 22	0 51	0 27	0 18	0 23	0 16	0 14	0 15	0 14	0 36	0 31	0 23	1 8	0 29	0 31	0 20	0 23	0 29	0 29	0 20	0 25	0 29	0 24	0 29	0 34	0 25	0 37
18	16207276	T	C	0 23	0 20	0 28	0 39	0 29	0 20	0 12	0 30	0 18	0 21	0 37	0 27	0 23	0 21	0 7	0 15	0 11	0 13	0 15	0 22	0 51	12 14	0 18	0 23	0 17	0 14	0 15	0 14	0 36	0 30	0 23	0 10	0 29	0 31	0 21	0 22	0 29	0 31	0 20	0 25	0 30	0 23	0 25	0 33	0 24	0 35
18	16207281	T	C	0 21	0 22	0 29	0 39	0 28	0 19	0 9	0 32	0 19	0 20	0 37	0 28	0 23	0 21	0 7	0 14	0 12	0 13	0 15	0 21	0 52	0 24	0 17	0 23	0 17	0 13	0 15	0 12	0 36	0 30	0 25	0 11	0 29	0 28	0 21	0 21	0 27	0 30	0 19	0 25	0 29	0 23	0 29	0 30	0 24	0 32
18	16207293	TTTCAATG	ATTTAATT	0 18	0 22	0 30	0 36	0 28	0 17	0 7	0 32	0 18	0 19	0 31	0 27	0 23	0 22	0 5	0 13	0 13	0 10	0 15	0 11	0 44	0 24	0 17	0 21	0 13	0 11	0 12	0 8	0 31	0 31	0 23	0 8	0 20	0 25	0 22	0 21	0 26	0 27	0 17	0 21	0 31	0 21	0 28	0 27	0 20	0 36
18	16207294	TTCA	ATCT	0 18	0 22	0 30	0 36	0 28	0 17	0 7	0 32	0 18	0 19	0 31	0 27	0 23	0 22	0 5	0 13	0 13	0 10	0 15	0 11	0 44	0 24	0 17	0 21	0 13	0 11	0 12	0 8	0 31	0 31	0 23	0 8	0 20	0 25	0 22	0 21	0 26	0 27	0 17	0 21	0 31	0 21	0 28	0 27	0 20	0 36
18	16207297	A	T	0 18	0 22	0 30	0 36	0 28	0 17	0 7	0 32	0 18	0 19	0 31	0 27	0 23	0 22	0 5	0 13	0 13	0 10	0 15	0 11	0 44	0 24	0 17	0 21	0 13	0 11	0 12	0 8	0 31	0 31	0 23	0 8	0 20	0 25	0 22	0 21	0 26	0 27	0 17	1 21	0 31	0 21	0 28	0 27	0 20	0 36
18	16207307	GA	G	0 18	0 24	0 21	0 36	0 25	0 22	0 6	0 36	0 20	0 22	0 35	0 30	0 25	0 22	0 6	0 11	0 17	0 9	0 17	0 16	0 42	0 20	0 16	0 19	0 16	0 9	0 13	0 7	0 11	0 13	0 26	0 3	4 14	26 0	15 0	19 0	25 0	28 0	16 0	18 0	26 0	17 0	25 0	29 0	18 0	37 0
18	16207312	T	G	0 18	0 24	0 21	0 36	0 25	0 22	0 6	0 36	0 20	0 22	0 35	0 30	0 25	0 22	0 6	0 11	0 17	0 9	0 17	0 16	0 42	0 20	0 16	0 19	0 16	0 9	0 13	0 7	23 11	14 13	0 26	5 3	0 14	0 0	0 0	0 0	0 0	0 0	0 0	0 0	0 0	0 0	0 0	0 0	0 0	0 0
18	16207324	T	C	0 19	0 27	0 26	0 38	0 29	0 25	0 10	0 37	0 25	0 28	0 40	0 29	0 25	0 18	0 6	0 12	0 16	0 9	0 16	0 14	0 43	0 23	0 22	0 17	0 16	0 6	0 12	0 8	0 37	0 34	0 26	0 7	0 20	0 28	0 20	0 19	0 25	0 26	0 16	0 16	0 29	0 15	0 29	0 31	0 15	0 38
18	16207338	T	G	0 24	0 24	0 26	0 39	0 26	0 25	0 14	0 34	0 28	0 26	0 40	0 32	0 25	0 14	0 7	0 12	0 18	0 10	0 14	0 14	0 47	0 22	0 22	0 21	0 13	0 7	0 13	0 9	0 32	0 29	0 21	0 7	0 23	0 27	0 19	0 16	0 25	0 23	0 14	0 11	0 26	0 17	0 27	0 30	0 12	0 33
18	16207345	G	A	0 23	0 23	0 28	0 37	0 25	0 23	0 14	0 32	0 28	0 28	0 44	0 31	0 27	0 13	0 7	0 12	0 17	0 12	0 15	0 15	0 49	0 20	0 22	0 19	0 11	0 8	0 13	0 10	0 27	0 29	9 6	0 7	0 23	0 24	0 16	0 15	0 25	0 20	0 13	0 12	0 29	0 17	0 26	0 24	0 13	0 32
18	16207351	C	T	0 26	0 24	0 30	0 41	0 24	0 26	0 15	0 34	0 29	0 29	0 47	0 33	0 31	0 14	0 7	0 14	0 19	0 14	0 14	0 16	0 53	0 20	0 28	0 23	0 10	0 7	0 13	0 11	0 23	0 29	0 19	0 7	0 23	0 26	0 15	0 21	0 26	0 23	0 14	0 12	0 30	0 16	0 30	0 24	8 4	0 29
18	16207359	T	G	0 29	0 28	0 34	0 42	0 29	0 26	0 18	0 34	0 33	0 30	0 48	0 33	0 32	0 12	0 9	0 13	0 21	0 14	0 15	0 16	0 52	0 23	0 25	0 20	0 10	0 6	0 12	0 12	0 18	0 29	0 20	0 7	0 20	0 24	0 15	0 21	0 24	0 22	0 12	0 11	0 30	0 17	0 30	0 20	0 11	0 30
18	16207420	G	A	0 31	0 28	0 37	0 25	0 34	0 27	0 22	0 29	0 26	0 21	0 40	0 37	0 32	0 19	0 5	0 10	0 14	0 21	0 15	0 19	0 39	14 7	0 16	0 16	0 11	0 10	0 10	0 11	0 0	0 18	0 33	0 3	0 15	0 0	0 0	0 0	0 0	0 0	0 0	0 0	0 0	0 0	0 0	0 0	0 0	0 0
18	16207438	T	C	0 27	0 28	0 35	0 25	0 34	0 27	0 16	0 29	0 20	0 16	0 34	0 34	0 36	0 20	0 3	0 9	0 11	0 20	0 15	0 17	0 32	0 21	0 11	0 10	0 9	0 7	0 8	0 13	6 5	5 16	0 34	1 3	0 16	0 11	0 13	0 16	0 25	0 17	0 16	0 21	0 29	0 15	0 18	0 16	0 9	0 23
18	16207443	G	A	0 25	0 29	0 37	0 31	0 39	0 30	0 16	0 30	0 17	0 15	0 33	0 37	0 38	0 22	0 3	0 11	0 12	0 19	0 16	0 15	0 33	0 21	0 11	0 10	0 11	0 8	0 8	0 11	0 13	0 21	0 32	0 6	0 13	0 14	0 13	0 18	0 27	0 19	0 16	0 21	0 29	0 15	0 21	0 18	0 11	0 23
18	16207450	T	A	0 22	0 27	0 38	0 30	0 41	0 31	0 15	0 27	0 18	0 10	0 29	0 36	0 35	0 20	0 3	0 10	0 9	0 17	0 14	0 16	0 26	0 21	0 9	0 7	0 12	0 6	0 7	0 8	0 16	0 23	0 31	0 6	0 13	0 14	0 13	0 18	0 27	0 19	0 17	0 20	0 30	0 16	0 23	0 19	9 2	0 24
18	16207458	AAAAGTTTTTCCTTTTTTTTTT	GTTTTTCC	0 4	0 5	0 19	0 12	0 8	0 12	0 2	0 0	0 0	0 1	0 2	0 4	0 7	0 3	0 0	0 2	0 4	0 5	0 2	0 3	0 8	0 1	0 6	0 2	0 7	0 3	0 0	0 5	0 8	0 1	0 4	0 0	4 3	12 0	10 0	7 0	17 0	12 0	14 0	10 0	14 0	9 0	16 0	11 0	1 0	14 0
18	16207458	AAAAGTTTTTCCTTTTTTTTTT	GTTTTTCCTTTTTTTTTTCC	0 4	0 5	0 19	0 12	0 8	0 12	0 2	0 0	0 0	0 1	0 2	0 4	0 7	0 3	0 0	0 2	0 4	0 5	0 2	0 3	0 8	0 1	0 6	0 2	0 7	0 3	0 0	0 5	0 8	0 1	0 4	0 0	0 3	0 0	0 0	0 0	0 0	0 0	0 0	0 0	0 0	0 0	0 0	0 0	4 0	0 0
18	16207461	AGTTTTTCCTTTTTTT	GTTTCTCCTTTA	0 4	0 5	0 19	0 12	0 8	0 12	0 2	0 0	0 0	0 1	0 2	0 4	0 7	0 3	0 0	0 2	0 4	0 5	0 2	0 3	0 8	0 1	0 6	0 2	0 7	0 3	0 0	0 5	0 8	0 1	0 4	0 0	0 3	0 0	0 0	0 0	0 0	0 0	0 0	0 0	0 0	0 0	0 0	0 0	0 0	0 0
18	16207466	TTCCTTTT	CTCC	0 4	0 5	0 19	0 12	0 8	0 12	0 2	0 0	0 0	0 1	0 2	0 4	0 7	0 3	0 0	0 2	0 4	0 5	0 2	0 3	0 8	0 1	0 6	0 2	0 7	0 3	0 0	0 5	0 8	0 1	0 4	0 0	0 3	0 0	0 0	0 0	0 0	0 0	0 0	0 0	0 0	0 0	0 0	0 0	0 0	0 0
18	16207466	TTCCTTT	CTCC	0 4	0 5	0 19	0 12	0 8	0 12	0 2	0 0	0 0	0 1	0 2	0 4	0 7	0 3	0 0	0 2	0 4	0 5	0 2	0 3	0 8	0 1	0 6	0 2	0 7	0 3	0 0	0 5	0 8	0 1	0 4	0 0	0 3	0 0	0 0	0 0	0 0	0 0	0 0	0 0	0 0	0 0	0 0	0 0	0 0	0 0
18	16207469	CT	C	0 4	0 5	3 19	2 12	12 8	0 12	3 2	8 0	4 0	1 1	8 2	7 4	12 7	5 3	0 0	1 2	0 4	2 5	0 2	0 3	2 8	0 1	0 6	0 2	0 7	0 3	0 0	0 5	5 8	5 1	3 4	3 0	0 3	0 0	0 0	0 0	0 0	0 0	0 0	0 0	0 0	0 0	0 0	0 0	0 0	0 0
18	16207469	CTT	C	0 4	0 5	0 19	0 12	1 8	0 12	0 2	1 0	1 0	0 1	0 2	1 4	0 7	0 3	0 0	0 2	0 4	0 5	0 2	0 3	0 8	3 1	0 6	0 2	0 7	0 3	0 0	0 5	0 8	1 1	0 4	0 0	0 3	0 0	0 0	0 0	0 0	0 0	0 0	0 0	0 0	0 0	0 0	0 0	0 0	0 0
18	16207469	CTTT	C	0 4	0 5	0 19	0 12	0 8	0 12	0 2	0 0	0 0	0 1	0 2	0 4	0 7	0 3	0 0	0 2	0 4	0 5	0 2	0 3	0 8	1 1	0 6	0 2	0 7	0 3	0 0	0 5	0 8	0 1	0 4	0 0	0 3	0 0	0 0	0 0	0 0	0 0	0 0	0 0	0 0	0 0	0 0	0 0	0 0	0 0
18	16207469	CTTTT	C	0 4	0 5	0 19	0 12	0 8	0 12	0 2	0 0	0 0	0 1	0 2	0 4	0 7	0 3	0 0	0 2	0 4	0 5	0 2	0 3	0 8	1 1	0 6	0 2	0 7	0 3	0 0	0 5	1 8	0 1	0 4	0 0	0 3	0 0	0 0	0 0	0 0	0 0	0 0	0 0	0 0	0 0	0 0	0 0	0 0	0 0
18	16207483	T	C	0 4	0 5	0 19	0 12	0 8	0 12	0 2	0 0	0 0	0 1	0 2	0 4	0 7	0 3	0 0	0 2	0 4	0 5	3 2	2 3	0 8	0 1	0 6	0 2	0 7	0 3	0 0	0 5	0 8	0 1	0 4	0 0	0 3	0 0	0 0	0 0	0 0	0 0	0 0	0 0	0 0	0 0	0 0	0 0	0 0	0 0
18	16207499	ATTTTCTAGT	A	0 7	0 17	0 27	0 14	0 25	0 14	0 4	0 17	0 12	0 10	0 16	0 18	0 24	0 15	0 3	0 7	0 2	0 12	0 12	0 5	0 18	0 16	0 8	0 9	0 9	0 7	0 1	0 4	10 18	16 0	0 20	6 0	0 10	0 16	0 18	0 15	0 29	0 20	0 21	0 19	0 26	0 17	0 27	0 24	0 17	0 26
18	16207501	T	A	0 7	0 17	0 27	7 14	0 25	0 14	0 4	0 17	0 12	0 10	0 16	0 18	0 24	0 15	0 3	0 7	0 2	0 12	0 12	0 5	0 18	0 16	0 8	0 9	0 9	0 7	0 1	0 4	0 18	0 0	0 20	0 0	0 10	0 16	0 18	0 15	0 29	0 20	0 21	0 19	0 26	0 17	0 27	0 24	0 17	0 26
18	16207502	TTCTAG	CTCTAT	0 7	0 17	0 27	0 14	0 25	0 14	0 4	0 17	0 12	0 10	0 16	0 18	0 24	0 15	0 3	0 7	0 2	0 12	0 12	0 5	0 18	0 16	0 8	0 9	0 9	0 7	0 1	0 4	0 18	0 0	0 20	0 0	0 10	0 16	0 18	0 15	0 29	0 20	0 21	0 19	0 26	0 17	0 27	0 24	0 17	0 26
18	16207507	G	TT	0 7	0 17	0 27	0 14	0 25	0 14	0 4	0 17	0 12	0 10	0 16	0 18	0 24	0 15	0 3	0 7	0 2	0 12	0 12	0 5	0 18	0 16	0 8	0 9	0 9	0 7	0 1	0 4	0 18	0 0	0 20	0 0	0 10	0 16	0 18	0 15	0 29	0 20	0 21	0 19	0 26	0 17	0 27	0 24	0 17	0 26
18	16207512	T	C	0 7	0 17	0 27	0 14	0 25	0 14	0 4	0 17	0 12	0 10	0 16	0 18	0 24	0 15	0 3	0 7	0 2	0 12	0 12	0 5	0 18	0 16	0 8	0 9	0 9	0 7	0 1	0 4	0 18	0 0	0 20	0 0	0 10	0 16	0 18	0 15	0 29	0 20	0 21	0 19	0 26	0 17	0 27	0 24	0 17	0 26
18	16207523	A	T	0 10	0 21	0 33	0 31	0 30	0 16	0 3	0 25	0 18	0 24	0 29	0 22	0 26	0 21	0 4	0 10	0 5	0 15	0 15	0 6	0 28	0 28	0 3	0 11	0 10	0 13	0 2	0 5	0 37	0 27	0 26	0 7	7 5	17 0	19 0	15 0	36 0	22 0	25 0	21 0	28 0	20 0	31 0	27 0	19 0	27 0
18	16207523	ATA	TTT	0 10	0 21	0 33	0 31	0 30	0 16	0 3	0 25	0 18	0 24	0 29	0 22	0 26	0 21	0 4	0 10	0 5	0 15	0 15	0 6	0 28	0 28	0 3	0 11	0 10	0 13	0 2	0 5	0 37	0 27	0 26	0 7	0 5	0 0	0 0	0 0	0 0	0 0	0 0	0 0	0 0	0 0	0 0	0 0	0 0	0 0
18	16207528	T	A	0 9	0 22	0 33	0 33	0 29	0 21	0 5	0 24	0 19	0 25	0 31	0 25	0 26	0 21	0 4	0 10	0 6	0 14	0 16	0 7	0 28	0 29	0 5	0 12	0 9	0 12	0 2	0 4	0 40	0 30	0 29	7 0	0 13	0 19	0 21	0 17	0 36	0 23	0 25	0 22	0 28	0 23	0 32	0 28	0 20	0 30
18	16207529	A	C	0 8	0 22	0 33	0 33	0 30	0 20	0 5	0 24	0 19	0 25	0 32	0 25	0 25	0 21	0 4	0 10	0 6	0 14	0 17	0 7	0 28	0 29	0 5	0 12	0 9	0 12	0 2	0 4	0 41	0 30	0 30	0 7	8 5	19 0	20 0	16 0	34 0	24 0	25 0	22 0	28 0	24 0	32 0	27 0	5 14	30 0
18	16207536	T	G	0 9	0 22	0 35	0 35	0 28	0 18	0 5	0 26	0 22	0 28	0 34	0 28	0 25	0 22	0 4	0 10	0 6	0 14	0 16	0 8	0 30	0 29	0 5	0 11	0 9	0 12	0 3	0 4	0 38	0 35	0 32	0 7	0 14	0 20	0 21	0 19	0 36	0 26	0 25	0 22	0 29	0 25	0 33	0 28	0 20	0 31
18	16207537	G	T	0 9	0 23	0 35	0 36	0 27	0 19	0 5	0 25	0 21	0 28	0 34	0 28	0 25	0 22	0 4	0 9	0 6	0 14	0 16	0 8	0 31	0 29	0 5	0 11	0 9	0 12	0 3	0 4	0 38	0 35	0 32	0 7	0 14	20 0	22 0	19 0	36 0	26 0	26 0	23 0	30 0	25 0	33 0	29 0	5 14	31 0
18	16207538	T	C	0 9	0 24	0 36	0 35	0 29	0 18	0 5	0 26	0 22	0 28	0 36	0 29	0 24	0 21	0 4	0 9	0 6	0 14	0 16	0 8	0 33	0 30	0 5	0 11	0 9	0 12	0 3	0 4	0 37	0 36	0 32	0 7	0 14	0 22	0 23	0 20	0 36	0 27	0 26	0 24	0 30	0 25	0 32	0 29	0 20	0 31
18	16207542	T	C	0 11	0 25	0 36	0 36	0 28	0 19	0 5	0 28	0 24	0 30	0 35	0 26	0 23	0 20	0 5	0 10	0 5	0 16	0 17	0 9	0 33	0 29	0 5	0 10	0 8	0 12	0 3	0 4	0 34	0 36	0 32	0 7	0 14	0 24	0 21	0 15	0 34	0 29	0 25	0 24	0 29	0 29	0 31	0 28	0 20	0 30
18	16207548	C	A	0 14	0 26	0 39	0 35	0 26	0 20	0 6	0 28	0 23	0 29	0 40	0 29	0 22	0 22	0 4	0 12	0 6	0 16	0 18	0 10	0 36	0 33	0 6	0 12	0 10	0 15	0 5	0 8	0 37	0 35	0 35	0 6	0 15	0 25	0 19	0 18	0 35	0 28	0 24	0 20	0 27	0 27	0 31	0 28	0 19	0 31
18	16207561	G	C	0 16	0 30	0 39	0 36	0 26	0 23	0 6	0 33	0 25	0 26	0 48	0 33	0 21	0 26	0 3	0 12	0 6	0 16	0 19	0 10	0 38	0 34	0 6	0 14	0 13	0 16	0 6	0 8	0 43	0 35	0 37	0 4	0 16	0 26	0 16	0 18	0 34	0 28	0 23	0 22	0 25	0 32	0 31	0 25	0 17	0 34
18	16207567	T	C	0 17	0 33	0 38	0 40	0 26	0 24	0 6	0 36	0 28	0 29	1 47	0 33	0 21	0 27	0 3	0 13	0 7	0 16	0 20	0 12	0 38	0 42	0 6	0 13	0 14	0 14	0 6	0 9	0 44	0 37	0 37	0 5	0 18	0 25	0 17	0 17	0 33	0 29	0 23	0 22	0 25	0 29	0 29	0 25	0 16	0 34
18	16207572	T	C	0 18	0 33	0 37	0 39	0 25	0 24	0 6	0 35	0 29	0 30	0 49	0 35	0 19	0 26	0 2	0 13	0 7	0 16	0 20	0 11	0 36	0 43	0 6	0 14	0 13	0 13	0 7	0 9	16 21	0 37	0 33	0 5	0 18	0 25	0 20	0 17	0 33	0 29	0 22	0 21	0 25	0 27	0 31	0 23	0 16	0 30
18	16207573	AAG	TAAA	0 18	0 33	0 37	0 39	0 25	0 24	0 6	0 35	0 29	0 30	0 49	0 35	0 19	0 26	0 2	0 13	0 7	0 16	0 20	0 11	0 36	0 43	0 6	0 14	0 13	0 13	0 7	0 9	0 21	0 37	0 33	0 5	0 18	0 25	0 20	0 17	0 33	0 29	0 22	0 21	0 25	0 27	0 31	0 23	0 16	0 30
18	16207575	G	A	0 18	0 33	0 37	0 39	0 25	0 24	0 6	0 35	0 29	0 30	0 49	0 35	0 19	0 26	0 2	0 13	0 7	0 16	0 20	0 11	0 36	0 43	0 6	0 14	0 13	0 13	0 7	0 9	0 21	0 37	0 33	0 5	0 18	0 25	0 20	0 17	0 33	0 29	0 22	0 21	0 25	0 27	0 31	0 23	0 16	0 30
18	16207576	A	T	0 18	0 35	0 39	0 43	0 24	0 25	0 6	0 35	0 30	0 32	0 49	0 35	0 19	0 26	0 2	0 14	0 7	0 17	0 19	0 11	0 38	0 45	0 6	0 15	0 13	0 15	0 8	0 10	0 38	0 38	0 34	0 5	0 19	0 26	0 21	0 17	0 33	0 27	0 23	0 22	0 26	0 26	0 31	0 22	12 5	0 30
18	16207586	A	G	0 20	0 34	0 36	0 45	0 24	0 21	0 5	0 38	0 28	0 29	0 50	0 31	0 20	0 24	0 2	0 14	0 9	0 15	0 13	0 11	0 37	23 20	0 5	0 16	0 12	0 17	0 9	0 10	20 15	34 0	30 0	5 0	11 7	25 0	22 0	18 0	32 0	32 0	20 0	22 0	25 0	25 0	29 0	22 0	19 0	31 0
18	16207586	AA	GT	0 20	0 34	0 36	0 45	0 24	0 21	0 5	0 38	0 28	0 29	0 50	0 31	0 20	0 24	0 2	0 14	0 9	0 15	0 13	0 11	0 37	0 20	0 5	0 16	0 12	0 17	0 9	0 10	0 15	0 0	0 0	0 0	0 7	0 0	0 0	0 0	0 0	0 0	0 0	0 0	0 0	0 0	0 0	0 0	0 0	0 0
18	16207601	A	C	0 22	0 32	0 35	0 44	0 24	0 27	0 6	0 40	0 31	0 29	0 46	0 36	0 26	0 23	0 3	0 14	0 11	0 15	0 11	0 12	0 39	0 45	0 7	0 15	0 12	0 16	0 10	0 13	0 37	0 33	0 33	0 5	0 26	0 24	0 21	0 20	0 31	0 32	0 19	0 19	0 22	0 25	0 27	0 22	0 17	0 29
18	16207603	GTA	ATT	0 21	0 32	0 32	0 42	0 24	0 28	0 7	0 40	0 30	0 28	0 46	0 35	0 26	0 22	0 3	0 14	0 10	0 15	0 10	0 12	0 37	0 44	0 7	0 14	0 12	0 14	0 10	0 12	0 36	0 33	0 35	0 5	0 27	0 24	0 20	0 19	0 29	0 31	0 18	0 19	0 22	0 28	0 26	0 23	0 16	0 29
18	16207606	TTA	T	0 20	0 33	0 30	0 39	0 22	0 28	0 7	0 40	0 30	0 26	0 43	0 34	0 26	0 21	0 2	0 14	0 10	0 14	0 11	0 12	0 38	0 42	0 7	0 15	0 14	0 14	0 10	0 12	0 35	0 32	0 34	0 6	17 10	23 0	19 0	18 0	29 0	29 0	16 0	18 0	22 0	25 0	21 0	20 0	7 10	27 0
18	16207609	T	A	0 20	0 33	0 30	0 39	0 22	0 28	0 7	0 40	0 30	0 26	0 43	0 34	0 26	0 21	0 2	0 14	0 10	0 14	0 11	0 12	0 38	0 42	0 7	0 15	0 14	0 14	0 10	0 12	0 35	0 32	0 34	0 6	0 10	0 0	0 0	0 0	0 0	0 0	0 0	0 0	0 0	0 0	0 0	0 0	0 10	0 0
18	16207613	C	G	0 23	0 33	0 30	0 37	0 22	0 30	0 7	0 42	0 28	0 25	0 44	0 36	0 28	0 21	0 3	0 14	0 10	0 15	0 10	0 13	0 43	0 41	0 9	0 13	0 14	0 15	0 10	0 14	0 38	0 33	0 36	0 5	0 29	0 27	0 22	0 20	0 29	0 32	0 21	0 21	0 23	0 26	0 24	0 22	0 18	0 28
18	16207620	TTT	CTC	0 23	0 36	0 34	0 37	0 21	0 29	0 9	0 40	0 27	0 20	0 41	0 36	0 26	0 21	0 3	0 12	0 12	0 15	0 11	0 14	0 42	0 41	0 11	0 15	0 12	0 13	0 11	0 14	0 34	0 30	0 33	0 6	0 27	0 30	0 18	0 21	0 28	0 30	0 21	0 21	0 25	0 25	0 26	0 22	0 21	0 26
18	16207624	C	T	0 22	0 37	0 38	0 39	0 22	0 29	0 8	0 43	0 30	0 20	0 45	0 37	0 27	0 22	0 3	0 13	0 11	0 15	0 9	0 13	0 41	0 41	0 10	0 17	0 13	0 13	0 11	0 16	0 36	7 22	0 32	2 4	1 26	0 31	0 19	0 20	0 28	0 31	0 20	0 21	0 26	0 24	0 25	0 19	0 21	0 26
18	16207629	TA	T	0 23	0 35	0 35	0 35	0 18	0 25	0 10	0 43	0 25	0 18	0 39	0 34	0 26	0 24	0 4	0 14	0 10	0 15	0 9	0 13	0 35	0 39	0 10	0 16	0 13	0 12	0 10	0 15	0 37	0 31	0 28	0 11	0 24	0 31	0 17	0 21	0 22	0 29	0 21	0 21	0 28	0 26	0 23	0 19	0 24	0 27
18	16207636	C	T	0 23	0 38	0 38	0 36	0 22	0 29	0 10	0 44	0 28	0 20	0 39	0 36	0 28	0 26	0 5	0 14	0 12	0 15	0 9	0 12	0 39	0 38	0 10	0 17	0 15	0 12	0 11	0 18	0 37	9 23	0 27	0 12	0 26	0 30	0 18	0 23	0 23	0 30	0 21	0 21	0 29	0 27	0 22	0 20	0 24	0 27
18	16207644	C	T	0 22	0 37	0 38	0 36	0 22	0 31	0 10	0 43	0 29	0 19	0 38	0 35	0 31	0 25	0 5	0 16	0 12	0 14	0 8	0 15	0 39	0 37	0 10	0 16	0 15	0 11	0 10	0 18	0 32	0 33	0 29	0 11	1 29	0 30	0 18	0 22	0 24	0 29	0 22	0 21	0 29	0 30	0 24	0 17	0 25	0 27
18	16207661	CG	C	0 23	0 36	0 43	0 30	0 21	0 31	0 14	0 40	0 24	0 24	0 35	0 26	0 30	0 25	0 7	0 12	0 11	0 13	0 9	0 13	0 42	0 36	0 11	0 15	0 11	0 10	0 7	0 19	18 14	0 37	0 27	0 12	0 28	0 36	0 21	0 24	0 26	0 28	0 23	0 21	0 29	0 31	0 26	0 15	0 23	0 27
18	16207666	G	A	0 23	0 37	0 41	0 31	0 23	0 29	0 16	0 40	0 22	0 23	0 38	0 30	0 31	0 24	0 7	0 12	0 11	0 13	0 9	0 14	0 42	0 33	0 11	0 17	0 11	0 10	0 9	0 21	0 34	0 38	0 25	0 13	15 12	0 37	0 22	0 24	0 27	0 30	0 22	0 22	0 31	0 28	0 26	0 16	0 22	0 28
18	16207666	G	T	0 23	0 37	0 41	0 31	0 23	0 29	0 16	0 40	0 22	0 23	0 38	0 30	0 31	0 24	0 7	0 12	0 11	0 13	0 9	0 14	0 42	0 33	0 11	0 17	0 11	0 10	0 9	0 21	0 34	0 38	0 25	0 13	0 12	0 37	0 22	0 24	0 27	0 30	0 22	0 22	0 31	0 28	0 26	0 16	0 22	0 28
18	16207668	C	G	0 23	0 37	0 40	0 30	0 23	0 28	0 17	0 41	0 24	0 27	0 39	0 29	0 32	0 25	0 7	0 12	0 11	0 13	0 10	0 16	0 43	0 35	0 11	0 17	0 10	0 10	0 9	0 21	0 34	0 38	0 25	0 13	0 26	0 38	0 20	0 26	0 25	0 30	0 20	0 20	0 32	0 29	0 25	0 18	0 24	0 29
18	16207672	CAATGTTTTCCACT	C	0 17	0 30	0 37	0 21	0 22	0 27	0 15	0 35	0 20	0 24	0 34	0 21	0 29	0 22	0 8	0 9	0 10	0 9	0 10	0 14	0 40	0 26	0 11	0 12	0 8	0 5	0 6	0 19	0 26	0 32	0 21	0 13	0 20	0 34	0 20	0 24	0 28	0 26	0 19	0 19	0 29	0 25	0 22	0 18	0 25	0 26
18	16207689	G	A	0 26	0 33	0 45	0 31	0 25	0 30	0 17	0 39	0 22	0 28	0 47	0 29	0 33	0 27	0 8	0 11	0 11	0 8	0 13	0 18	0 52	0 31	0 15	0 15	0 11	0 7	0 7	0 20	0 32	0 36	0 24	0 12	0 26	0 38	0 23	0 26	0 34	0 29	0 21	0 21	0 32	0 28	0 26	0 21	0 28	0 29
18	16207692	A	C	0 24	0 35	0 46	0 32	0 25	0 30	0 17	0 41	0 20	0 27	0 47	0 28	0 32	0 27	0 8	0 11	0 12	0 7	0 11	0 18	0 52	23 9	0 15	0 15	0 10	0 8	0 7	0 20	0 29	0 37	0 23	0 15	0 24	0 34	0 21	0 26	0 33	0 27	0 21	0 19	0 31	0 29	0 27	0 21	0 28	0 31
18	16207695	T	C	0 26	0 33	0 42	0 31	0 26	0 33	0 19	21 20	9 11	0 28	0 48	0 29	0 30	0 29	0 8	0 12	0 12	0 7	0 13	0 18	0 52	0 31	0 15	0 15	0 10	6 2	0 7	0 20	0 31	0 38	0 22	0 15	0 23	0 34	0 19	0 25	0 32	0 25	0 20	0 20	0 33	0 28	0 26	0 22	0 30	0 30
18	16207716	T	A	0 23	0 29	0 48	0 36	0 32	0 30	0 21	0 38	0 19	0 34	0 52	0 33	0 28	0 27	0 6	0 14	0 13	0 8	0 13	0 17	0 48	0 28	0 14	0 15	0 7	0 8	0 7	0 17	0 26	0 32	0 20	0 14	0 24	0 28	0 18	0 22	0 34	0 25	0 22	0 16	0 30	0 26	0 27	0 25	0 11	0 29
18	16207716	T	C	0 23	0 29	0 48	0 36	0 32	0 30	0 21	0 38	0 19	0 34	0 52	0 33	0 28	0 27	0 6	0 14	0 13	0 8	0 13	0 17	0 48	0 28	0 14	0 15	0 7	0 8	0 7	0 17	0 26	0 32	0 20	0 14	0 24	0 28	0 18	0 22	0 34	0 25	0 22	0 16	0 30	0 26	0 27	0 25	19 11	0 29
18	16207721	GCAA	ACAT	0 23	0 26	0 44	0 34	0 33	0 31	0 18	0 37	0 18	0 35	0 47	0 32	0 26	0 27	0 7	0 13	0 13	0 8	0 13	0 17	0 49	0 28	0 15	0 14	0 7	0 9	0 8	0 15	0 14	0 16	0 19	0 11	0 24	0 34	0 23	0 23	0 36	0 22	0 20	0 13	0 30	0 31	0 25	0 25	0 32	0 29
18	16207724	A	T	0 23	0 26	0 44	0 34	0 33	0 31	0 18	0 37	0 18	0 35	0 47	0 32	0 26	0 27	0 7	0 13	0 13	0 8	0 13	0 17	0 49	0 28	0 15	0 14	0 7	0 9	0 8	0 15	13 14	17 16	1 19	3 11	0 24	0 34	0 23	0 23	0 36	0 22	0 20	0 13	0 30	0 31	0 25	0 25	0 32	0 29
18	16207726	T	G	0 24	0 26	0 45	0 35	0 35	0 32	0 18	0 38	0 21	0 37	0 46	0 34	0 28	0 26	0 6	0 14	0 13	0 8	0 12	0 18	0 53	0 27	0 18	0 14	0 7	0 9	0 8	0 16	0 28	0 35	0 21	0 14	0 26	0 35	0 23	0 23	0 38	0 23	0 21	0 15	0 29	0 32	0 26	0 25	19 12	0 32
18	16207731	G	T	0 24	0 26	0 46	0 36	0 35	0 33	0 18	0 39	0 20	0 37	0 45	0 33	0 30	0 23	0 6	0 13	0 12	0 8	0 13	0 17	0 52	18 9	0 19	0 14	0 8	0 10	0 8	0 15	0 27	0 35	0 18	0 13	0 27	0 34	0 24	0 22	0 38	0 22	0 21	0 16	0 27	0 33	0 27	0 25	0 34	0 28
18	16207737	A	T	0 24	0 23	0 46	0 37	0 35	0 31	0 18	0 39	0 20	0 35	0 46	0 35	0 27	0 24	0 6	0 13	0 15	0 9	0 12	0 16	0 51	0 26	0 19	0 13	0 6	0 11	0 7	0 13	15 12	19 17	0 23	11 3	14 11	34 0	23 0	24 0	39 0	23 0	21 0	16 0	28 0	34 0	28 0	26 0	13 20	29 0
18	16207742	C	T	0 25	0 21	0 44	0 35	0 33	0 33	0 18	0 39	0 19	0 38	0 48	0 36	0 26	0 26	0 5	0 12	0 16	0 9	0 12	0 15	0 49	0 28	0 19	0 13	0 6	0 10	0 8	0 13	0 26	0 33	0 21	0 15	0 24	0 35	0 25	0 22	0 38	0 23	0 20	0 17	0 28	0 33	0 28	0 26	0 34	0 29
18	16207748	G	A	0 23	0 20	0 44	0 37	0 34	0 35	0 19	0 40	0 18	0 38	0 50	0 38	0 28	0 28	0 4	0 12	0 18	0 9	0 11	0 16	0 52	0 27	0 22	0 14	0 6	0 12	0 8	0 15	11 13	0 32	0 24	0 14	0 24	0 35	0 24	0 22	0 40	0 22	0 21	0 17	0 28	0 35	0 26	0 26	0 31	0 31
18	16207755	C	T	0 22	0 17	0 44	0 38	0 38	0 40	0 15	0 40	0 20	0 36	0 48	0 39	0 32	0 28	0 4	0 12	0 19	0 8	0 12	0 17	0 50	0 26	0 22	0 13	0 9	0 12	0 8	0 14	0 25	0 27	0 25	0 17	0 24	0 34	0 24	0 22	0 42	0 23	0 18	0 16	0 29	0 33	0 26	0 26	0 34	0 33
18	16207774	C	A	0 26	0 22	0 46	0 41	0 39	0 40	0 12	0 43	0 23	0 34	0 51	0 39	0 30	0 24	0 3	0 10	0 18	0 10	0 15	0 14	0 53	0 27	0 19	0 15	0 11	0 16	0 7	0 14	0 26	0 34	0 30	0 17	0 25	0 27	0 27	0 21	0 45	0 26	0 14	0 17	0 32	0 36	0 27	0 27	0 26	0 38
18	16207776	TAC	CAA	0 24	0 22	0 46	0 37	0 36	0 38	0 13	0 42	0 25	0 32	0 51	0 33	0 27	0 24	0 3	0 8	0 18	0 10	0 15	0 13	0 51	0 28	0 18	0 14	0 10	0 16	0 7	0 14	0 25	0 32	0 31	0 17	0 23	0 25	0 27	0 22	0 45	0 26	0 14	0 17	0 29	0 33	0 26	0 28	0 28	0 36
18	16207788	G	T	0 22	0 27	0 47	0 38	0 39	0 41	0 12	0 47	0 27	0 36	0 46	0 37	0 30	0 23	0 4	0 11	0 17	0 13	0 16	0 10	0 55	0 29	0 21	0 17	0 10	0 17	0 8	0 15	0 30	0 34	0 36	0 15	0 24	0 27	0 31	0 24	0 48	0 29	0 15	0 17	0 32	0 35	0 32	0 31	0 29	0 41
18	16207790	C	G	0 22	0 25	0 47	0 36	0 38	0 42	0 12	0 46	0 27	0 39	0 48	0 37	0 31	0 23	0 4	0 11	0 16	0 13	0 16	0 10	0 56	0 29	0 20	0 16	0 11	0 17	0 7	0 14	0 31	0 33	0 38	0 16	0 23	0 27	0 31	0 24	0 47	0 29	0 15	0 18	0 33	0 35	0 33	0 33	0 29	0 41
18	16207798	G	T	0 20	0 27	0 47	0 41	0 36	0 38	0 10	0 46	0 28	0 41	0 42	0 35	0 31	0 26	0 4	0 11	0 16	0 14	0 19	0 10	0 58	0 36	0 24	0 16	0 12	0 19	0 9	0 16	0 35	0 35	0 37	0 16	0 22	0 25	0 30	0 26	0 45	0 28	0 15	0 21	0 32	0 34	0 34	0 33	0 30	0 45
18	16207801	C	A	0 20	0 28	0 45	0 42	0 36	0 38	0 11	0 45	0 28	0 42	0 44	0 35	0 31	0 27	0 4	0 13	0 16	0 13	0 19	0 10	0 58	0 35	0 24	0 16	0 12	0 20	0 10	0 16	0 34	0 35	0 41	0 15	13 12	0 24	1 28	0 28	0 43	0 28	0 13	0 21	0 32	0 34	0 34	0 33	0 28	0 45
18	16207806	A	G	0 22	0 31	0 46	1 41	0 34	0 38	0 11	0 46	0 30	0 40	0 48	0 35	0 31	0 28	0 4	0 10	0 16	0 14	0 20	0 10	0 58	0 39	0 21	0 18	0 13	0 19	0 11	0 15	0 34	0 34	0 41	0 16	0 29	1 21	0 28	0 28	0 39	0 30	0 13	0 21	0 34	0 33	0 34	0 34	0 32	20 27
18	16207807	G	A	0 23	0 31	0 47	0 42	0 33	0 36	0 11	0 44	0 30	0 41	0 47	0 36	0 32	0 29	0 4	0 11	0 16	0 13	0 19	0 9	0 57	0 40	0 21	0 16	0 13	0 20	0 11	0 16	0 35	0 35	0 41	0 16	0 30	0 22	0 26	0 27	0 39	0 30	0 13	0 23	0 35	0 34	0 34	0 34	0 32	0 46
18	16207848	A	G	0 37	0 42	0 48	0 47	0 42	0 39	0 10	0 42	0 31	0 39	0 59	0 34	0 36	0 37	0 6	0 14	0 12	0 16	0 21	0 18	0 49	0 50	0 19	0 17	0 16	0 21	0 17	0 20	0 36	0 35	0 37	0 18	0 32	0 25	0 29	0 25	0 38	0 35	0 13	0 23	0 36	0 27	0 33	0 34	0 28	0 47
18	16207863	ATAT	A	0 38	0 38	0 47	0 50	0 39	0 37	0 11	0 38	0 30	0 36	0 58	0 33	0 31	0 36	0 7	0 14	0 15	0 19	0 19	0 17	0 47	0 48	0 23	0 19	0 9	0 19	0 20	0 19	28 0	23 0	25 0	14 0	18 15	21 0	26 0	26 0	32 0	35 0	15 0	23 0	36 0	24 0	30 0	32 0	28 0	42 0
18	16207872	A	G	0 40	0 37	0 46	0 50	0 41	0 42	0 16	0 41	0 34	0 36	0 64	0 37	0 32	0 38	0 7	0 17	0 17	0 19	0 21	0 20	0 44	0 50	0 24	0 17	0 8	0 18	0 22	0 20	0 39	0 30	0 33	0 16	0 38	0 24	0 29	0 29	0 35	0 35	0 18	0 23	0 39	0 28	0 33	0 32	0 31	0 44
18	16207872	A	T	0 40	0 37	0 46	0 50	0 41	0 42	0 16	0 41	0 34	0 36	0 64	0 37	0 32	0 38	0 7	0 17	0 17	0 19	0 21	0 20	0 44	0 50	0 24	0 17	0 8	0 18	0 22	0 20	0 39	0 30	0 33	0 16	0 38	0 24	0 29	0 29	0 35	0 35	0 18	0 23	0 39	0 28	0 33	0 32	0 31	0 44
18	16207888	CCT	TCG	0 43	0 39	0 49	0 56	0 41	0 58	0 19	0 37	0 35	0 36	0 63	0 39	0 33	0 42	0 6	0 14	0 18	0 22	0 21	0 25	0 41	0 47	0 18	0 19	0 12	0 17	0 25	0 20	0 38	0 30	0 33	0 14	0 44	0 25	0 30	0 30	0 33	0 33	0 20	0 24	0 42	0 28	0 32	0 38	0 28	0 43
18	16207908	T	A	0 48	0 43	0 56	0 55	0 42	0 58	0 23	0 37	0 38	0 39	0 67	0 39	0 34	0 39	0 6	0 15	0 18	0 22	0 17	0 29	0 41	0 44	0 17	0 19	0 11	0 13	0 24	0 26	0 39	0 37	0 35	0 14	0 41	0 26	0 33	0 33	0 29	0 34	0 20	0 26	0 39	0 29	0 34	0 39	0 27	0 43
18	16207930	T	C	0 43	0 40	0 55	0 52	0 40	0 52	0 27	0 40	0 47	0 40	0 65	0 38	0 35	0 32	0 6	0 13	0 19	0 22	0 16	0 26	0 49	0 43	0 17	0 17	0 9	0 13	0 21	0 26	47 0	20 0	0 38	14 0	20 22	33 0	30 0	31 0	31 0	37 0	22 0	28 0	41 0	28 0	34 0	34 0	10 16	40 0
18	16207930	TCA	CCC	0 43	0 40	0 55	0 52	0 40	0 52	0 27	0 40	0 47	0 40	0 65	0 38	0 35	0 32	0 6	0 13	0 19	0 22	0 16	0 26	0 49	0 43	0 17	0 17	0 9	0 13	0 21	0 26	1 0	14 0	0 38	0 0	0 22	0 0	1 0	0 0	0 0	0 0	0 0	0 0	0 0	1 0	0 0	0 0	0 16	0 0
18	16207937	T	C	0 44	0 41	0 54	0 50	0 42	0 56	0 30	0 43	0 51	0 44	0 71	0 43	0 36	0 32	0 8	0 14	0 21	0 22	0 16	0 24	0 50	0 45	0 20	0 16	0 8	0 12	0 22	0 28	0 48	0 40	0 42	0 18	0 44	0 33	0 26	0 31	0 28	0 40	0 19	0 27	0 40	0 27	0 30	0 33	0 24	0 41
18	16207942	G	T	0 41	0 40	0 56	0 49	0 41	0 56	0 28	0 46	0 49	0 45	0 72	0 45	0 38	0 32	0 7	0 15	0 21	0 21	0 17	0 23	0 51	29 15	0 21	0 17	0 8	0 12	0 20	0 27	0 49	0 42	0 44	0 18	0 43	0 34	0 30	0 30	0 29	0 38	0 20	0 30	0 37	0 25	0 32	0 30	0 25	0 41
18	16207945	AC	A	0 41	0 38	0 55	0 48	15 26	0 54	11 17	0 47	0 51	0 47	0 69	0 43	0 38	0 31	0 7	0 15	0 22	0 21	0 16	0 21	0 54	0 40	0 19	0 16	0 9	0 10	0 20	0 26	0 50	0 45	0 44	0 17	0 39	0 36	0 31	0 30	0 30	0 37	0 20	0 28	0 37	0 27	0 30	0 31	0 25	0 37
18	16207946	C	G	0 41	0 38	0 55	0 48	0 26	0 54	0 17	0 47	0 51	0 47	0 69	0 43	0 38	0 31	0 7	0 15	0 22	0 21	0 16	0 21	0 54	0 40	0 19	0 16	0 9	0 10	0 20	0 26	0 50	0 45	0 44	0 17	0 39	0 36	0 31	0 30	0 30	0 37	0 20	0 28	0 37	0 27	0 30	0 31	0 25	0 37
18	16207946	C	T	0 41	0 38	0 55	0 48	0 26	0 54	0 17	0 47	0 51	0 47	0 69	0 43	0 38	0 31	0 7	0 15	0 22	0 21	0 16	0 21	0 54	0 40	0 19	0 16	0 9	0 10	0 20	0 26	0 50	0 45	0 44	0 17	0 39	0 36	0 31	0 30	0 30	0 37	0 20	0 28	0 37	0 27	0 30	0 31	0 25	0 37
18	16207964	T	C	0 41	0 44	0 53	0 45	0 40	0 53	0 28	0 51	0 50	0 47	0 74	0 51	0 42	0 45	0 7	0 16	0 21	0 20	0 13	0 22	0 54	0 42	0 18	0 14	0 15	0 9	0 19	0 28	0 47	0 44	0 46	0 19	0 42	0 37	0 34	0 26	0 31	0 38	0 21	0 29	0 34	0 25	0 30	0 29	0 24	0 38
18	16207975	T	C	0 40	0 43	0 58	0 48	0 43	0 52	0 23	0 52	0 47	0 48	0 76	0 51	0 42	0 47	0 7	0 17	0 23	0 19	0 10	0 21	0 52	0 42	0 18	0 15	0 16	0 9	0 21	0 28	0 46	0 42	0 49	0 17	0 39	0 35	0 33	0 24	0 24	0 34	0 21	0 28	0 36	0 30	0 30	0 27	0 25	0 36
18	16207976	T	C	0 40	0 44	0 56	0 47	0 44	0 52	0 24	0 53	0 48	0 48	0 78	0 50	0 42	0 47	0 7	0 17	0 23	0 19	0 10	0 20	0 53	0 42	0 19	0 15	0 16	0 9	0 21	0 27	0 46	0 42	0 49	0 16	0 40	0 35	0 32	0 28	0 26	0 34	0 19	0 29	0 36	0 30	0 31	0 26	0 25	0 38
18	16207984	T	TTGA	0 35	0 40	0 54	0 38	0 41	0 39	0 22	0 52	0 43	0 47	0 79	0 52	0 38	0 42	0 8	0 17	0 26	0 14	0 9	0 20	0 48	0 42	0 18	0 14	0 13	0 8	0 17	0 30	0 43	0 36	0 48	0 17	0 38	0 35	0 31	0 26	0 25	0 34	0 19	0 28	0 35	0 33	0 30	0 29	0 26	0 38
18	16207991	C	A	0 38	0 39	0 56	0 39	1 41	0 40	0 26	0 52	0 47	0 53	0 79	0 55	0 39	0 44	0 8	0 17	0 25	0 16	0 11	0 19	0 52	0 42	0 20	0 16	0 13	0 10	0 19	0 29	46 0	37 0	52 0	18 0	16 21	33 0	28 0	24 0	26 0	32 0	18 0	28 0	32 0	31 0	28 0	25 0	23 0	33 0
18	16207998	G	T	0 40	0 40	0 59	0 41	0 43	0 42	0 25	0 54	0 45	0 53	0 78	0 54	0 40	0 45	0 8	0 17	0 28	0 16	0 11	0 17	0 55	0 42	0 21	0 17	0 16	0 10	0 20	0 29	0 43	0 38	0 53	0 17	0 40	34 0	34 1	26 0	30 0	36 0	21 0	29 0	33 0	31 0	35 0	30 0	12 11	37 0
18	16208000	T	C	0 40	0 40	0 58	0 41	0 45	0 43	0 24	0 56	0 45	0 52	0 80	0 54	0 37	0 44	0 8	0 17	0 26	0 14	0 11	0 16	0 55	0 41	0 20	0 16	0 16	0 10	0 20	0 29	0 41	0 39	0 54	0 17	0 41	0 35	0 32	0 25	0 30	0 36	0 23	0 30	0 34	0 31	0 35	0 29	0 23	0 38
18	16208008	GGAATGT	G	0 34	0 33	0 56	0 44	0 47	0 39	0 20	0 53	0 43	0 49	0 75	0 54	0 35	0 42	0 8	0 14	0 21	0 12	0 7	0 13	0 55	0 34	0 18	0 15	0 17	0 9	0 20	0 25	0 38	0 42	0 51	0 16	0 36	0 34	0 31	0 22	0 28	0 33	0 22	0 29	0 30	0 30	0 37	0 25	0 24	0 35
18	16208019	ATTGCAGGGT	A	0 33	0 30	0 57	0 40	0 46	0 39	0 17	0 51	0 33	0 49	0 72	0 55	0 38	0 42	0 7	0 16	0 18	0 13	0 8	0 17	0 46	0 35	0 23	0 16	0 17	0 7	0 21	0 26	0 41	0 35	0 42	0 15	0 33	0 31	0 29	0 19	0 28	0 35	0 18	0 28	0 28	0 25	0 32	0 21	0 26	0 35
18	16208020	T	A	0 33	0 30	0 57	0 40	0 46	0 39	0 17	0 51	0 33	0 49	0 72	0 55	0 38	0 42	0 7	0 16	0 18	0 13	0 8	0 17	0 46	0 35	0 23	0 16	0 17	0 7	0 21	0 26	0 41	0 35	0 42	0 15	0 33	0 31	0 29	0 19	0 28	0 35	0 18	0 28	0 28	0 25	0 32	0 21	0 26	0 35
18	16208024	AG	A	0 33	0 30	0 57	0 40	0 46	0 39	0 17	0 51	0 33	0 49	0 72	0 55	0 38	0 42	0 7	0 16	0 18	0 13	0 8	0 17	0 46	0 35	0 23	0 16	0 17	0 7	0 21	0 26	0 41	0 35	0 42	0 15	0 33	0 31	0 29	0 19	0 28	0 35	0 18	0 28	0 28	0 25	0 32	0 21	0 26	0 35
18	16208037	A	G	0 37	0 29	0 66	0 50	0 55	0 45	0 17	0 60	0 40	0 48	0 79	0 64	0 39	0 48	0 6	0 16	0 20	0 15	0 12	0 28	0 54	0 43	0 24	0 22	0 18	0 9	0 28	0 33	0 46	0 43	0 47	0 15	0 40	0 31	0 28	0 21	0 26	0 40	0 20	0 29	0 32	0 28	0 38	0 24	0 27	0 38
18	16208052	G	T	0 41	0 32	0 64	0 54	0 55	0 47	0 18	0 51	0 36	0 44	0 75	0 56	0 37	0 51	0 7	0 16	1 22	0 12	0 15	0 25	0 48	0 45	0 24	0 22	0 17	0 12	0 21	0 34	0 47	0 43	0 45	0 14	0 39	0 32	0 26	0 22	0 26	0 42	0 22	0 30	0 34	0 28	0 40	0 24	0 29	0 40
18	16208056	C	CATCA	0 41	0 30	0 64	0 56	0 53	0 48	0 19	0 48	0 36	0 42	0 74	0 56	0 36	0 45	0 8	0 16	0 23	0 13	0 15	0 24	0 50	0 45	0 24	0 21	0 14	0 13	0 23	0 33	0 44	0 50	0 44	0 13	0 39	0 32	0 27	0 21	0 27	0 41	0 22	0 28	0 34	0 27	0 40	0 24	0 29	0 37
18	16208060	A	T	0 41	0 30	0 67	0 57	0 56	0 48	0 19	0 51	0 37	0 44	0 75	0 55	0 37	0 44	0 8	0 15	0 23	0 13	0 15	0 23	0 54	0 44	0 26	0 21	0 13	0 14	0 23	0 34	0 45	0 52	0 46	0 13	0 41	0 29	0 27	0 22	0 26	0 37	0 24	0 28	0 36	0 27	0 43	0 24	0 29	0 37
18	16208061	A	G	0 41	0 30	0 67	1 56	0 58	0 50	0 19	0 52	0 37	0 45	0 75	0 54	0 39	24 19	0 8	0 15	0 23	0 13	0 15	0 23	0 55	0 44	0 25	0 21	0 12	0 14	0 23	0 35	0 45	0 53	0 45	0 13	0 40	0 30	0 25	0 22	0 25	0 38	0 24	0 29	0 35	0 27	0 40	0 25	0 28	0 35
18	16208063	A	G	0 42	0 29	0 66	0 54	0 58	0 49	0 17	0 52	0 38	0 44	0 73	0 53	0 38	0 42	0 8	0 16	0 23	0 13	0 15	0 23	1 54	0 43	0 25	0 21	0 12	0 14	0 22	0 34	0 44	0 53	0 46	0 11	0 40	0 29	0 26	0 22	0 25	0 37	0 24	0 30	0 35	0 27	0 41	0 25	0 28	0 39
18	16208080	TG	T	0 45	0 23	0 63	0 55	0 51	0 50	0 20	0 48	0 35	0 46	0 64	0 52	0 38	0 41	0 8	0 13	0 17	0 13	0 17	0 23	0 56	0 43	0 26	0 19	0 11	0 16	0 22	0 37	0 38	0 53	0 43	0 11	0 45	0 26	0 24	0 20	0 22	0 36	0 22	0 28	0 30	0 28	0 41	0 24	0 30	0 35
18	16208083	A	G	0 46	0 23	0 64	0 58	0 52	0 52	0 19	0 50	0 36	0 47	0 67	0 53	0 38	0 42	0 8	0 13	0 18	0 13	0 17	0 22	0 58	0 44	0 27	0 20	0 11	0 14	0 23	0 39	0 38	0 52	0 45	0 11	0 46	0 27	0 24	0 19	0 22	0 36	0 25	0 27	0 31	0 28	0 41	0 24	0 30	0 35
18	16208092	C	A	0 46	0 20	0 65	0 56	0 47	0 54	0 19	0 52	0 35	0 45	0 71	0 52	0 38	0 41	0 8	0 13	0 16	0 11	0 18	0 23	0 51	0 42	0 28	0 18	0 11	0 14	0 24	0 38	0 38	0 51	0 42	0 11	0 53	0 29	0 24	0 20	0 21	0 37	0 27	0 27	0 30	0 28	0 38	0 25	0 28	0 31
18	16208099	AAA	TTT	0 44	0 19	0 56	0 53	0 41	0 54	0 18	0 43	0 34	0 38	0 67	0 47	0 36	0 39	0 8	0 11	0 18	0 9	0 17	0 22	0 46	0 43	0 27	0 17	0 7	0 13	0 23	0 38	0 29	0 45	0 42	0 11	0 50	0 27	0 23	0 18	0 20	0 35	0 26	0 26	0 27	0 26	0 37	0 26	0 28	0 20
18	16208101	A	C	0 44	0 19	0 56	0 53	0 41	0 54	0 18	0 43	0 34	0 38	0 67	0 47	0 36	0 39	0 8	0 11	0 18	0 9	0 17	0 22	0 46	0 43	0 27	0 17	0 7	0 13	0 23	0 38	0 29	0 45	0 42	0 11	0 50	0 27	0 23	0 18	0 20	0 35	0 26	0 26	0 27	0 26	0 37	0 26	0 28	11 20
18	16208101	AATAT	CATAG	0 44	0 19	0 56	0 53	0 41	0 54	0 18	0 43	0 34	0 38	0 67	0 47	0 36	0 39	0 8	0 11	0 18	0 9	0 17	0 22	0 46	0 43	0 27	0 17	0 7	0 13	0 23	0 38	0 29	0 45	0 42	0 11	0 50	0 27	0 23	0 18	0 20	0 35	0 26	0 26	0 27	0 26	0 37	0 26	0 28	0 20
18	16208107	CAA	TAG	0 46	0 19	0 59	0 54	0 44	0 58	0 24	0 46	0 35	0 45	0 68	0 47	0 36	0 46	0 6	0 11	0 18	0 12	0 19	0 24	0 44	0 46	0 26	0 20	0 6	0 12	0 25	0 38	0 29	0 16	0 43	0 6	0 54	0 26	0 23	0 21	0 19	0 34	0 25	0 26	0 28	0 27	0 42	0 28	0 29	0 33
18	16208109	A	G	0 46	0 19	1 59	0 54	0 44	0 58	0 24	0 46	0 35	0 45	0 68	0 47	0 36	0 46	0 6	0 11	0 18	0 12	0 19	0 24	0 44	0 46	0 26	0 20	0 6	0 12	0 25	0 38	0 29	31 16	0 43	4 6	0 54	0 26	0 23	0 21	0 19	0 34	0 25	0 26	0 28	0 27	0 42	0 28	0 29	0 33
18	16208110	C	T	0 47	0 21	0 60	0 56	0 45	0 58	0 24	0 48	0 36	0 46	0 68	0 49	0 38	0 46	0 6	0 11	0 22	0 11	0 19	0 26	0 45	27 20	0 27	0 20	0 6	0 12	0 26	0 38	0 30	0 49	0 45	0 10	0 55	0 27	0 23	0 21	0 19	0 35	0 27	0 26	0 30	0 27	0 44	0 28	0 30	0 34
18	16208120	T	C	0 50	0 25	0 59	0 56	0 44	0 55	0 24	0 47	0 36	0 47	0 72	0 42	0 34	0 47	0 6	0 11	0 23	0 12	0 18	0 22	0 45	0 44	0 24	0 21	0 5	0 15	0 24	0 38	0 29	0 50	0 45	0 12	0 53	0 27	0 19	0 15	0 19	0 35	0 24	0 24	0 23	0 23	0 44	0 30	0 29	0 31
18	16208127	C	CCTGTGTGG	0 47	0 24	0 54	0 55	0 39	0 52	0 26	0 46	0 31	0 51	0 67	0 35	0 34	0 46	0 6	0 13	0 21	0 11	0 17	0 16	0 40	0 32	0 22	0 17	0 5	0 13	0 23	0 37	0 16	0 41	0 42	0 12	0 49	0 29	0 20	0 19	0 16	0 35	0 27	0 28	0 28	0 24	0 41	0 28	0 29	0 31
18	16208133	C	T	0 46	0 26	0 55	0 60	0 42	0 54	0 28	0 48	0 32	0 56	0 72	0 41	0 35	0 46	0 7	0 14	0 22	0 14	0 17	0 18	0 49	0 38	0 24	0 18	0 5	0 14	0 23	0 37	0 17	0 45	0 45	0 12	0 55	0 31	0 21	0 19	0 17	0 36	0 26	0 29	0 29	0 24	0 42	0 27	0 30	0 32
18	16208137	GA	G	0 49	0 27	0 51	0 61	0 37	0 51	0 27	0 47	0 32	0 54	0 71	0 40	0 31	0 45	0 8	0 12	0 21	0 13	0 16	0 19	0 51	0 39	0 26	0 18	0 4	0 15	0 24	0 34	0 16	0 46	0 44	0 12	0 51	0 27	0 21	0 19	0 17	0 35	0 26	0 27	0 30	0 23	0 42	0 27	0 31	0 31
18	16208142	C	A	0 47	0 26	0 54	0 64	0 39	0 52	0 29	0 47	0 32	0 57	0 72	0 41	0 31	0 45	0 8	0 14	0 21	0 13	0 16	0 21	0 53	0 40	0 26	0 18	0 5	0 14	0 26	0 33	0 19	0 47	0 45	0 11	24 27	29 0	21 0	19 0	16 0	36 0	25 0	26 0	30 0	22 0	44 0	27 0	17 16	31 0
18	16208145	G	A	0 47	0 26	0 53	0 62	0 44	0 53	0 28	0 48	0 33	0 57	0 70	0 41	0 29	0 44	0 7	0 14	0 22	0 13	0 20	0 21	0 53	0 41	0 28	0 17	0 6	0 14	0 26	0 32	0 18	0 45	0 47	0 11	0 54	0 31	0 17	0 19	0 12	0 35	0 24	0 26	0 32	0 23	0 42	0 27	0 30	0 30
18	16208161	CC	TT	0 45	0 32	0 49	0 56	0 43	0 58	0 30	0 50	0 32	0 58	0 67	0 38	0 27	0 40	0 7	0 16	0 20	0 14	0 19	0 23	0 54	0 44	0 27	0 21	0 5	0 14	0 23	0 30	0 20	0 47	0 49	0 14	0 49	0 34	0 20	0 20	0 14	0 36	0 24	0 31	0 32	0 27	0 40	0 25	0 33	0 32
18	16208165	G	GT	0 42	0 32	0 41	0 56	0 47	0 57	0 30	0 48	0 28	0 53	0 62	0 36	0 27	0 33	0 5	0 17	0 20	0 14	0 19	0 23	0 52	0 39	0 26	0 21	0 5	0 12	0 22	0 27	0 22	0 44	0 48	0 15	0 44	0 34	0 20	0 22	0 13	0 35	0 22	0 29	0 26	0 24	0 41	0 26	0 31	0 32
18	16208171	G	T	0 42	0 32	0 41	0 56	0 47	0 57	0 30	0 48	0 28	0 53	0 62	0 36	0 27	0 33	0 5	0 17	0 20	0 14	0 19	0 23	0 52	0 39	0 26	0 21	0 5	0 12	0 22	0 27	0 22	0 44	0 48	0 15	0 44	0 34	0 20	0 22	0 13	0 35	0 22	0 29	0 26	0 24	0 41	0 26	0 31	0 32
18	16208175	G	T	0 43	0 35	0 46	0 56	0 52	0 60	0 32	0 50	0 30	0 55	0 66	0 38	0 29	0 35	0 6	0 23	0 21	0 15	0 18	0 23	0 54	0 43	0 29	0 24	0 6	0 14	0 24	0 26	24 0	24 24	0 51	6 11	0 43	0 33	0 19	0 26	0 15	0 35	0 24	0 29	0 29	0 26	0 37	0 26	0 30	0 31
18	16208178	AT	A	0 39	0 35	0 45	0 52	0 52	0 56	0 31	0 51	0 32	0 55	0 63	0 34	0 30	0 34	0 5	0 24	0 21	0 16	0 17	0 21	0 48	0 41	0 29	0 23	0 6	0 13	0 23	0 20	0 22	0 46	50 0	0 15	0 41	0 33	0 21	0 25	0 15	0 33	0 23	0 28	0 29	0 25	0 38	0 25	0 30	0 29
18	16208179	TTC	CTG	0 39	0 35	0 45	0 52	0 52	0 56	0 31	0 51	0 32	0 55	0 63	0 34	0 30	0 34	0 5	0 24	0 21	0 16	0 17	0 21	0 48	0 41	0 29	0 23	0 6	0 13	0 23	0 20	0 22	0 46	0 0	0 15	0 41	0 33	0 21	0 25	0 15	0 33	0 23	0 28	0 29	0 25	0 38	0 25	0 30	0 29
18	16208186	T	C	0 44	0 39	0 52	0 51	0 57	0 59	0 32	0 55	0 33	0 58	0 67	0 40	0 33	0 37	0 5	0 24	0 22	0 18	0 17	0 24	0 51	0 43	0 29	0 25	0 6	0 15	0 24	0 20	0 23	0 44	0 52	0 15	0 41	0 35	0 20	0 24	0 15	0 32	0 24	0 28	0 30	0 28	0 38	0 23	0 31	0 29
18	16208198	AC	GT	0 44	0 39	0 52	0 50	0 55	0 65	0 29	0 53	0 40	0 60	0 66	0 39	0 34	0 38	0 5	0 22	0 20	0 21	0 18	0 25	0 56	0 41	0 25	0 24	0 8	0 15	0 19	0 23	0 25	0 44	0 48	0 16	0 44	0 37	0 20	0 26	0 17	0 30	0 23	0 25	0 30	0 25	0 38	0 22	0 30	0 27
18	16208201	CGTCA	TGTCC	0 41	0 39	0 48	0 49	0 54	0 64	0 23	0 52	0 37	0 58	0 66	0 38	0 32	0 35	0 5	0 20	0 20	0 18	0 16	0 22	0 55	0 40	0 26	0 23	0 7	0 14	0 19	0 18	0 24	0 43	0 49	0 15	0 40	0 37	0 19	0 25	0 16	0 28	0 22	0 26	0 31	0 23	0 38	0 23	0 30	0 27
18	16208210	G	A	0 42	0 41	0 50	0 51	0 56	0 67	0 26	0 55	0 43	0 58	0 69	0 37	0 32	0 33	0 5	0 22	0 20	0 17	0 15	0 23	0 61	0 40	0 27	0 23	0 7	0 15	0 20	0 19	0 27	0 45	0 56	0 17	0 41	0 39	0 16	0 27	0 19	0 29	0 23	0 27	0 32	0 23	0 39	0 22	0 31	0 26
18	16208215	A	AT	0 39	0 38	0 47	0 47	0 51	0 68	0 25	0 51	0 44	0 51	0 62	0 39	0 29	0 30	0 5	0 23	0 18	0 18	0 16	0 21	0 59	0 37	0 26	0 23	0 9	0 12	0 20	0 21	0 23	0 43	0 50	0 17	0 25	0 0	0 0	0 0	0 0	0 0	0 0	0 0	0 0	0 0	0 0	0 0	0 17	0 0
18	16208217	T	C	0 39	0 38	0 47	0 47	0 51	0 68	0 25	0 51	0 44	0 51	1 62	0 39	0 29	0 30	0 5	0 23	0 18	0 18	0 16	0 21	0 59	0 37	0 26	0 23	0 9	0 12	0 20	0 21	0 23	0 43	0 50	0 17	17 25	40 0	16 0	24 0	19 0	26 0	26 0	26 0	32 0	19 0	41 0	25 0	14 17	26 0
18	16208221	C	T	0 37	0 38	0 47	0 49	0 51	0 66	0 25	0 53	0 48	0 53	0 65	0 42	0 32	0 31	0 5	0 21	0 18	0 19	0 18	0 22	0 62	0 37	0 26	0 24	0 10	0 13	0 23	0 22	0 23	0 44	0 51	0 17	0 45	0 41	0 18	0 24	0 19	0 28	0 26	0 27	0 33	0 19	0 42	0 26	0 32	0 27
18	16208225	T	A	0 36	0 40	0 46	0 48	0 52	0 64	0 25	0 50	0 51	0 52	0 66	0 42	0 31	0 28	0 5	0 20	0 18	0 21	0 15	0 21	0 65	0 38	0 27	0 24	0 10	0 13	0 22	0 21	0 23	18 25	0 50	11 5	0 46	0 39	0 18	0 26	0 19	0 28	0 27	0 28	0 31	0 20	0 43	0 29	0 32	0 29
18	16208228	G	A	0 38	0 39	0 46	0 49	0 50	0 64	0 27	0 46	0 50	0 51	0 65	0 43	0 33	0 28	0 5	0 20	0 17	0 20	0 17	0 19	0 64	0 37	0 26	0 24	0 11	0 13	0 22	0 22	0 21	0 42	25 24	0 18	0 45	0 41	0 18	0 25	0 19	0 31	0 27	0 27	0 33	0 21	0 44	0 31	0 31	0 29
18	16208252	C	T	0 43	0 39	0 51	1 55	0 44	0 64	0 27	0 52	0 57	0 44	0 66	1 47	0 43	0 41	0 4	0 21	0 17	0 17	0 12	0 16	0 56	0 41	0 17	0 23	0 13	0 15	0 19	0 22	0 22	0 40	21 16	0 18	0 48	0 40	0 14	0 25	0 24	0 33	0 23	0 27	0 35	0 25	0 45	0 30	0 32	0 24
18	16208262	A	C	0 40	0 34	0 54	0 54	0 41	0 54	0 25	0 52	0 56	0 42	0 70	0 49	0 44	0 43	0 5	0 19	0 15	0 21	0 10	0 17	0 55	0 44	0 16	0 21	0 14	0 14	0 20	0 23	0 29	0 41	0 40	0 16	0 50	0 38	0 12	0 26	0 28	0 31	0 23	0 25	0 31	0 23	0 43	0 29	0 28	0 19
18	16208278	A	G	0 41	0 37	0 54	0 59	0 42	0 55	0 26	0 52	0 59	0 44	0 72	0 50	0 45	0 44	0 4	0 14	0 15	0 22	0 13	0 19	0 60	0 42	0 10	0 18	0 14	0 15	0 18	0 26	0 35	0 38	0 36	0 18	0 50	0 37	0 14	0 27	0 31	0 28	0 26	0 25	0 36	0 22	0 46	0 27	0 27	0 23
18	16208285	T	G	0 36	0 40	0 51	0 58	0 42	0 51	0 24	0 48	0 60	0 40	0 66	0 49	0 42	0 42	0 5	0 13	0 15	0 21	0 12	0 19	0 59	0 43	0 9	0 17	0 15	0 14	0 17	0 26	20 12	25 17	0 39	7 11	0 49	0 35	0 15	0 29	0 29	0 29	0 25	0 25	0 37	0 22	0 45	0 28	0 28	0 23
18	16208293	G	C	0 35	0 42	0 45	0 54	0 44	0 45	0 23	0 50	0 55	0 40	0 66	0 50	0 43	0 41	0 5	0 12	0 15	0 19	0 11	0 15	0 53	0 44	0 9	0 18	0 14	0 14	0 18	0 25	0 13	0 18	0 30	0 11	0 42	0 34	0 16	0 32	0 29	0 29	0 26	0 26	0 37	0 23	0 46	0 29	0 30	0 24
18	16208293	GT	G	0 35	0 42	0 45	0 54	0 44	0 45	0 23	0 50	0 55	0 40	0 66	0 50	0 43	0 41	0 5	0 12	0 15	0 19	0 11	0 15	0 53	0 44	0 9	0 18	0 14	0 14	0 18	0 25	19 13	20 18	0 30	7 11	0 42	0 34	0 16	0 32	0 29	0 29	0 26	0 26	0 37	0 23	0 46	0 29	0 30	0 24
18	16208293	G	GTATA	0 35	0 42	0 45	0 54	0 44	0 45	0 23	0 50	0 55	0 40	0 66	0 50	0 43	0 41	0 5	0 12	0 15	0 19	0 11	0 15	0 53	0 44	0 9	0 18	0 14	0 14	0 18	0 25	0 13	0 18	0 30	0 11	0 42	0 34	0 16	0 32	0 29	0 29	0 26	0 26	0 37	0 23	0 46	0 29	0 30	0 24
18	16208294	T	C	0 35	0 42	0 45	0 54	0 44	0 45	0 23	0 50	0 55	0 40	0 66	0 50	0 43	0 41	0 5	0 12	0 15	0 19	0 11	0 15	0 53	0 44	0 9	0 18	0 14	0 14	0 18	0 25	0 13	0 18	0 30	0 11	0 42	0 34	0 16	0 32	0 29	0 29	0 26	0 26	0 37	0 23	0 46	0 29	0 30	0 24
18	16208298	C	T	0 38	0 46	0 48	0 53	0 45	0 44	0 24	0 55	0 51	0 42	0 68	0 52	0 45	0 43	0 5	0 13	0 15	0 17	0 11	0 17	0 54	0 45	0 11	0 17	0 14	0 14	0 20	0 24	0 31	0 42	0 31	0 19	0 43	0 34	0 16	0 33	0 27	0 30	0 26	0 27	0 37	0 26	0 47	0 29	0 31	0 24
18	16208300	G	T	0 37	0 46	0 49	0 52	0 45	0 45	0 25	0 52	0 54	0 41	0 66	0 50	0 46	0 42	0 5	0 13	0 15	0 19	0 12	0 16	0 56	0 44	0 10	0 18	0 14	0 14	0 21	0 26	0 32	0 43	0 30	0 19	0 44	0 33	0 13	0 33	0 28	0 27	0 26	0 27	0 37	0 25	0 47	0 29	0 31	0 22
18	16208319	G	A	0 38	0 43	0 45	0 53	0 46	0 49	0 24	0 56	0 43	0 43	0 75	0 49	0 52	0 45	0 8	0 18	0 14	0 21	0 10	0 19	0 55	0 46	0 12	0 18	0 15	0 13	0 22	0 25	0 39	0 44	0 34	0 20	0 39	0 35	0 13	0 31	0 29	0 29	0 27	0 24	0 40	0 24	0 56	0 29	0 29	0 22
18	16208321	G	A	0 41	0 43	0 46	0 53	0 48	0 47	0 24	0 55	0 44	0 43	0 72	0 51	0 51	0 44	0 8	0 18	0 15	0 20	0 9	0 20	0 52	0 46	0 12	0 18	0 15	0 13	0 22	0 27	0 41	0 46	0 33	0 20	0 40	0 34	0 16	0 29	0 29	0 28	0 28	0 25	2 37	0 24	0 56	0 29	0 28	0 22
18	16208340	A	ACGAT	0 34	0 39	0 38	0 46	0 42	0 45	0 17	0 48	0 35	0 48	0 64	0 49	0 43	0 39	0 9	0 16	0 18	0 20	0 9	0 20	0 48	0 35	0 11	0 18	0 16	0 7	0 25	0 30	0 40	0 40	0 37	0 21	0 39	0 31	0 18	0 31	0 27	0 27	0 28	0 24	0 38	0 20	0 60	0 32	0 29	0 27
18	16208340	A	G	0 34	0 39	0 38	0 46	0 42	0 45	0 17	0 48	0 35	0 48	0 64	0 49	0 43	0 39	0 9	0 16	0 18	0 20	0 9	0 20	0 48	0 35	0 11	0 18	0 16	0 7	0 25	0 30	0 40	0 40	0 37	0 21	0 39	0 31	0 18	0 31	0 27	0 27	0 28	0 24	0 38	0 20	0 60	0 32	0 29	0 27
18	16208350	T	A	0 37	0 39	0 45	0 46	0 47	0 52	0 19	0 50	1 36	0 52	0 67	0 50	0 52	0 42	0 9	0 17	0 19	0 19	0 11	0 22	0 47	0 43	0 12	0 18	0 18	0 10	0 29	0 34	0 42	0 45	0 42	0 22	0 45	0 30	0 17	0 32	0 28	0 27	0 30	0 26	0 37	0 20	0 58	0 29	0 29	0 29
18	16208356	T	G	0 38	0 37	0 44	0 47	0 48	0 53	0 20	0 49	0 35	0 50	0 65	0 50	0 48	0 41	0 8	0 16	0 20	0 16	0 11	0 20	0 48	0 43	0 11	0 21	0 18	0 10	0 31	0 34	0 42	0 42	0 42	0 22	0 42	0 31	0 20	0 33	0 31	0 27	0 31	0 24	0 38	0 24	0 57	0 31	0 29	0 31
18	16208362	A	T	0 40	0 40	0 42	0 45	0 50	0 56	0 21	0 51	0 35	0 55	0 66	0 48	0 49	0 37	0 8	0 17	0 21	0 14	0 12	0 22	0 47	0 44	0 15	0 22	0 17	0 11	0 30	0 33	0 43	0 47	0 41	0 20	0 44	0 31	0 21	0 34	0 29	0 25	0 27	0 26	0 36	0 24	0 53	0 27	0 27	0 31
18	16208365	G	T	0 38	0 41	0 43	0 46	0 46	0 54	0 20	0 47	0 33	0 54	0 64	0 48	0 50	0 40	0 8	0 18	0 21	0 14	0 12	0 22	0 47	0 44	0 15	0 22	0 16	0 11	0 30	0 34	0 44	0 47	0 39	0 22	0 43	0 32	0 19	0 34	0 32	0 27	0 30	0 25	0 36	0 26	0 52	0 26	0 29	0 32
18	16208369	GC	CT	0 36	0 40	0 40	0 44	0 43	0 55	0 19	0 46	0 30	0 54	0 62	0 44	0 48	0 39	0 8	0 18	0 17	0 13	0 11	0 23	0 46	0 47	0 16	0 24	0 17	0 9	0 31	0 33	0 43	0 46	0 37	0 21	0 45	0 32	0 19	0 33	0 33	0 26	0 31	0 26	0 35	0 25	0 52	0 25	0 28	0 30
18	16208372	A	G	0 36	0 39	0 41	0 44	0 42	0 54	0 18	0 50	0 29	0 55	0 61	0 44	0 49	0 39	0 9	0 17	0 19	0 13	0 11	0 21	0 46	0 48	0 16	0 25	0 17	0 12	0 30	0 34	0 42	0 45	0 41	0 22	0 46	0 31	0 17	0 32	0 33	0 29	0 31	0 26	0 35	0 24	0 51	0 23	0 27	0 33
18	16208374	GT	G	0 35	0 36	0 39	0 39	0 43	0 53	0 16	0 51	0 30	0 53	0 59	0 41	0 45	0 39	0 8	0 16	0 18	0 10	0 10	0 20	0 43	0 49	0 15	0 23	0 16	0 12	0 28	0 35	0 39	0 45	0 41	0 22	0 47	0 31	0 19	0 32	0 33	0 26	0 30	0 23	0 33	0 22	0 49	0 19	0 26	0 31
18	16208382	A	T	0 37	0 37	0 41	0 42	0 45	0 53	0 17	0 53	0 32	0 54	0 59	0 43	0 45	0 36	0 8	0 18	0 19	0 11	0 12	0 24	0 42	0 49	0 15	0 22	0 15	0 11	0 28	0 37	0 45	0 44	0 44	0 21	0 47	0 30	0 18	0 34	0 31	0 26	0 29	0 24	0 34	0 25	0 48	0 21	15 13	0 34
18	16208383	C	A	0 38	0 36	0 42	0 41	0 47	0 55	0 18	0 54	0 36	0 56	0 60	0 42	0 46	0 36	0 8	0 18	0 19	0 11	0 12	0 25	0 43	0 48	0 16	0 23	0 15	0 10	0 28	0 36	0 46	0 45	0 45	0 20	0 48	0 30	0 20	0 33	0 31	0 27	0 31	0 24	0 34	0 25	0 48	0 22	0 27	0 35
18	16208384	T	G	0 39	0 35	0 43	0 43	0 44	0 54	0 18	0 55	0 37	0 56	0 58	0 42	0 47	0 36	0 8	0 17	0 19	0 11	0 13	15 11	0 44	0 48	0 16	0 23	0 14	0 11	0 27	0 36	0 46	0 45	0 44	0 21	0 48	0 31	0 19	0 34	0 32	0 28	0 29	0 24	0 34	0 24	0 48	0 22	0 27	0 34
18	16208399	A	G	0 40	0 32	0 43	0 38	0 46	0 54	0 19	0 52	0 38	0 59	0 62	0 36	0 50	0 37	0 8	0 20	0 20	0 10	0 15	0 24	0 49	0 52	0 16	0 23	0 17	0 14	0 22	0 34	0 50	0 46	0 48	0 21	0 47	0 30	0 23	0 38	12 15	10 16	0 30	0 27	0 39	0 25	0 44	0 23	0 27	0 37
18	16208405	T	CGATC	0 41	0 33	0 42	0 35	0 42	0 54	0 17	0 51	0 39	0 60	0 63	0 35	0 48	0 34	0 7	0 18	0 21	0 8	0 14	0 24	0 45	0 53	0 15	0 22	0 16	0 14	0 23	0 35	0 50	0 46	0 47	0 21	0 48	0 33	0 24	0 38	0 27	0 25	0 30	0 26	0 41	0 23	0 44	0 25	0 28	0 39
18	16208416	T	G	0 44	0 34	0 46	0 40	0 43	0 58	0 17	0 53	0 38	0 59	0 59	0 33	0 46	0 38	0 6	0 16	0 19	0 6	0 15	0 24	0 41	0 54	0 18	0 21	0 14	0 18	0 22	0 31	0 49	0 50	0 48	0 19	1 46	0 33	0 22	0 35	0 23	0 26	0 29	0 24	0 43	0 25	0 43	0 27	0 31	0 37
18	16208419	A	T	0 44	0 34	0 48	0 40	0 44	0 59	0 18	0 54	0 38	0 56	0 55	0 34	0 48	0 37	0 6	0 16	0 19	0 5	0 15	0 25	0 41	0 52	0 19	0 20	0 15	0 17	0 23	0 31	0 49	0 47	0 49	0 19	0 51	0 36	0 22	0 35	0 23	0 28	0 27	0 24	0 42	0 25	0 44	0 27	0 33	0 37
18	16208428	A	T	0 40	0 35	0 46	0 42	0 46	0 58	0 18	0 56	0 36	0 59	0 58	0 35	0 46	0 40	0 8	0 17	0 18	0 4	0 13	0 22	0 41	0 58	0 20	0 18	0 13	0 19	0 24	0 30	0 47	0 43	0 48	0 18	24 24	37 0	22 0	35 0	22 0	29 0	27 0	23 0	42 0	25 0	43 0	28 0	14 17	34 0
18	16208429	TG	T	0 40	0 34	0 46	0 41	0 44	0 56	0 17	0 54	0 34	0 58	0 56	0 33	0 46	0 40	0 7	0 18	0 18	0 5	0 11	0 21	0 38	30 26	0 20	0 17	0 11	0 19	0 23	0 30	0 45	0 45	0 48	0 18	0 47	0 37	0 22	0 35	0 22	0 28	0 27	0 23	0 42	0 25	0 44	0 28	0 31	0 35
18	16208440	T	C	0 43	0 33	0 48	0 42	0 45	0 56	0 19	0 55	0 35	0 56	0 57	0 39	0 45	0 35	0 5	0 17	0 20	0 7	0 13	0 19	0 39	0 61	0 20	0 24	0 9	0 17	0 21	0 31	0 51	0 47	0 45	0 19	0 47	0 38	0 23	0 35	0 24	0 25	0 30	0 23	0 43	0 25	0 40	0 28	0 29	0 36
18	16208453	T	C	0 42	0 34	0 50	0 43	0 43	0 49	0 22	0 56	0 35	0 56	0 55	0 41	0 37	1 35	0 5	0 19	0 21	0 11	0 16	0 17	0 43	0 57	0 23	0 26	0 8	0 17	0 20	0 30	0 52	0 47	0 51	0 15	0 47	0 39	0 23	0 30	0 23	0 29	0 35	0 24	0 47	0 21	0 34	0 30	0 29	0 36
18	16208456	A	G	0 42	0 35	0 50	0 42	0 44	0 49	0 22	0 55	0 36	0 57	0 55	0 43	0 38	0 35	0 5	0 17	0 20	0 11	0 15	0 18	0 43	0 57	0 22	0 25	0 8	0 14	0 16	0 29	0 50	0 49	0 53	0 16	0 44	0 39	0 22	0 30	0 23	0 29	0 33	0 25	0 46	0 23	0 34	0 30	0 30	0 36
18	16208464	A	T	0 42	0 33	0 50	0 41	0 42	0 47	0 22	0 53	0 36	0 56	0 55	0 44	0 35	0 36	0 5	0 20	0 18	0 11	0 16	0 17	0 45	0 56	0 20	0 21	0 11	0 15	0 19	0 25	0 50	27 21	0 49	6 9	0 44	0 38	0 23	0 29	0 26	0 29	0 33	0 27	0 47	0 21	0 31	0 28	0 30	0 33
18	16208466	C	A	0 40	0 33	0 53	0 45	0 44	0 52	0 23	0 56	0 37	0 56	0 56	0 44	0 37	0 37	0 5	0 20	0 18	0 11	0 16	0 19	0 45	0 59	0 20	0 22	0 11	0 15	0 17	0 26	0 50	0 52	0 47	0 14	0 45	0 38	0 23	0 30	0 27	0 27	0 34	0 27	0 45	0 22	0 31	0 27	0 30	0 34
18	16208468	C	T	0 43	0 34	0 52	0 45	0 48	0 52	0 23	0 55	0 36	0 56	0 59	0 47	0 39	0 36	0 5	0 20	0 19	0 11	0 16	0 20	0 48	0 60	0 19	0 24	0 10	0 15	0 18	0 28	0 50	0 52	0 47	0 13	0 47	0 38	0 25	0 30	0 27	0 29	0 33	0 27	0 45	0 22	0 29	0 27	0 31	0 35
18	16208469	T	C	0 42	0 36	0 53	0 46	0 49	0 52	0 23	0 56	0 36	0 55	0 60	0 48	0 37	0 36	0 5	0 20	0 19	0 11	0 17	0 20	0 49	0 60	0 19	0 24	0 9	0 15	0 18	0 27	0 52	0 52	0 48	0 13	0 46	0 36	0 26	0 31	0 27	0 30	0 32	0 26	0 44	0 21	0 28	0 29	0 30	0 35
18	16208473	G	C	0 39	0 36	0 52	0 48	0 48	0 55	0 24	0 50	0 37	0 56	0 60	0 53	0 36	0 36	0 4	0 21	0 18	0 12	0 16	0 18	0 51	0 58	0 19	0 27	0 10	0 14	0 18	0 25	0 51	0 56	0 50	0 12	0 45	0 36	0 22	0 30	0 29	0 30	0 31	0 26	0 43	0 17	0 30	0 26	0 31	0 31
18	16208484	A	T	0 44	0 43	0 55	0 50	0 49	0 58	0 25	0 50	0 34	0 58	0 67	0 49	0 35	0 43	0 7	0 22	0 19	0 14	0 16	0 16	1 50	23 31	0 18	0 28	0 14	0 14	0 22	0 25	0 51	0 55	0 53	0 12	0 51	0 38	0 23	0 30	0 29	0 31	0 30	0 26	0 42	0 22	0 26	0 28	0 31	0 30
18	16208494	A	C	0 41	0 43	0 55	0 50	0 45	0 60	0 24	0 49	0 34	0 55	0 61	0 48	0 34	0 48	0 7	0 25	0 19	0 15	0 13	0 17	0 49	0 53	0 20	0 28	0 12	0 14	0 17	0 25	27 27	0 59	0 54	0 13	0 48	0 39	0 26	0 28	0 29	0 34	0 30	0 25	0 43	0 23	0 27	0 30	0 31	0 31
18	16208500	A	G	0 36	0 43	0 56	0 53	0 52	0 56	0 24	0 47	0 34	0 54	0 59	0 55	0 33	0 49	0 8	0 23	0 20	0 16	0 14	0 19	0 49	0 54	0 20	0 27	0 12	0 14	0 17	0 24	0 54	0 58	0 53	0 13	0 45	0 37	0 26	0 28	0 27	0 34	0 28	0 23	0 44	0 23	0 25	0 32	0 28	0 30
18	16208502	T	C	0 36	0 44	0 57	0 52	0 51	0 57	0 23	0 47	0 35	0 53	0 59	0 56	0 33	0 48	0 8	0 23	0 19	0 16	0 14	0 19	0 53	0 51	0 20	0 26	0 12	0 14	0 17	0 23	0 55	0 52	0 53	1 12	0 45	0 37	0 28	0 29	0 27	0 35	0 29	0 26	0 44	0 24	0 26	0 32	0 30	0 32
18	16208503	G	T	0 36	0 44	0 58	0 53	0 53	0 57	0 24	0 45	0 34	0 54	0 57	0 55	0 33	0 48	0 8	0 23	0 19	0 16	0 14	0 18	0 53	0 51	0 20	0 26	0 12	0 14	0 17	0 23	0 55	0 51	0 53	0 13	0 45	0 39	0 27	0 29	0 26	0 35	0 29	0 26	0 44	0 23	0 26	0 34	0 30	0 30
18	16208507	C	T	0 35	0 47	0 60	0 51	0 53	0 55	0 24	0 49	0 35	0 55	0 54	0 52	0 33	0 45	0 9	0 21	0 21	0 18	0 14	0 16	0 50	0 54	0 17	0 26	0 12	0 14	0 19	0 24	0 58	0 51	0 54	0 13	0 44	0 37	0 26	0 25	0 26	0 32	0 27	0 24	0 41	0 22	0 25	0 33	0 30	0 32
18	16208511	A	G	0 38	0 47	0 60	0 49	0 53	0 52	0 25	0 43	0 37	0 55	0 58	0 52	0 35	21 23	0 9	0 18	0 19	0 18	0 13	0 15	0 52	0 55	0 16	0 26	0 12	0 13	0 18	0 27	0 59	0 53	0 55	0 13	0 47	0 35	0 27	0 24	0 27	0 33	0 27	0 22	0 44	0 20	0 26	0 37	0 29	0 31
18	16208511	A	T	0 38	0 47	0 60	0 49	0 53	0 52	0 25	0 43	0 37	0 55	0 58	0 52	0 35	0 23	0 9	0 18	0 19	0 18	0 13	0 15	0 52	0 55	0 16	0 26	0 12	0 13	0 18	0 27	0 59	0 53	0 55	0 13	0 47	0 35	0 27	0 24	0 27	0 33	0 27	0 22	0 44	0 20	0 26	0 37	0 29	0 31
18	16208521	G	C	0 33	0 49	0 59	0 47	0 55	0 49	0 22	0 39	0 37	0 57	0 57	27 24	0 37	0 43	0 8	0 20	0 18	0 21	0 15	0 15	0 52	0 53	0 17	0 26	0 12	0 13	0 16	0 26	0 55	0 59	0 58	0 12	0 40	0 35	0 27	0 25	0 24	0 29	0 26	0 21	0 46	0 23	0 25	0 37	0 30	0 28
18	16208523	A	G	0 32	0 47	0 60	0 47	0 52	0 45	0 22	0 37	1 34	0 52	0 55	1 47	0 39	0 39	0 7	0 18	0 16	0 21	0 15	0 15	0 50	0 48	0 16	0 25	0 12	0 12	0 16	0 26	24 28	0 56	0 55	0 12	0 39	0 34	0 28	0 25	0 23	0 28	0 27	0 21	0 47	0 21	0 25	0 39	0 28	0 27
18	16208523	AAAAG	GAAGC	0 32	0 47	0 60	0 47	0 52	0 45	0 22	0 37	0 34	0 52	0 55	0 47	0 39	0 39	0 7	0 18	0 16	0 21	0 15	0 15	0 50	0 48	0 16	0 25	0 12	0 12	0 16	0 26	0 28	0 56	0 55	0 12	0 39	0 34	0 28	0 25	0 23	0 28	0 27	0 21	0 47	0 21	0 25	0 39	0 28	0 27
18	16208525	A	G	0 32	0 47	0 60	0 47	0 52	0 45	0 22	0 37	0 34	0 52	0 55	0 47	0 39	0 39	0 7	0 18	0 16	0 21	0 15	0 15	0 50	0 48	0 16	0 25	0 12	0 12	0 16	0 26	0 28	0 56	0 55	0 12	0 39	0 34	0 28	0 25	0 23	0 28	0 27	0 21	0 47	0 21	0 25	0 39	0 28	0 27
18	16208535	TA	T	0 35	0 48	0 56	0 48	0 55	0 46	0 23	0 40	0 35	0 55	0 58	0 50	0 41	0 41	0 8	0 20	0 15	0 20	0 13	0 18	0 56	0 43	0 16	0 19	0 13	0 14	0 16	0 22	0 48	0 56	0 50	0 11	15 26	34 0	28 0	25 0	26 0	23 0	24 0	20 0	45 0	20 0	25 0	37 0	17 12	23 0
18	16208536	A	G	0 35	0 48	0 56	0 48	0 55	0 46	0 23	0 40	0 35	0 55	0 58	0 50	0 41	0 41	0 8	0 20	0 15	0 20	0 13	0 18	0 56	0 43	0 16	0 19	0 13	0 14	0 16	0 22	0 48	0 56	0 50	0 11	0 26	0 0	0 0	0 0	0 0	0 0	0 0	0 0	0 0	0 0	0 0	0 0	0 12	0 0
18	16208551	T	C	0 37	0 53	0 59	0 50	0 54	0 57	0 21	0 43	0 38	0 55	0 67	0 54	0 45	0 44	0 7	0 21	0 14	0 22	0 14	0 22	0 52	0 48	0 18	0 19	0 17	0 16	0 16	0 24	0 47	0 57	0 49	0 12	0 41	0 31	0 24	0 20	0 26	0 25	0 24	0 17	0 41	0 22	0 26	0 33	0 34	0 23
18	16208557	C	T	0 37	0 52	0 57	0 48	0 56	0 57	0 22	0 44	0 37	0 56	0 66	0 51	0 47	0 42	0 7	0 19	0 15	0 24	0 15	0 19	0 53	0 48	0 18	0 19	0 16	0 17	0 18	0 26	0 48	0 51	0 52	0 10	0 39	0 28	0 24	0 19	0 29	0 26	0 26	0 18	0 44	0 25	0 24	0 35	0 35	0 27
18	16208562	C	A	0 37	0 48	0 55	0 47	0 56	0 56	0 22	0 43	0 35	0 57	0 67	0 51	0 48	0 41	0 7	0 16	0 17	0 24	0 15	0 20	0 51	0 47	0 18	0 19	0 15	0 17	0 17	0 27	0 46	0 48	21 28	0 9	18 22	28 0	24 0	18 0	28 2	25 0	23 0	17 0	43 0	25 0	22 0	32 0	20 14	28 0
18	16208563	ACTC	CCTG	0 38	0 48	0 52	0 47	0 55	0 54	0 22	0 41	0 32	0 56	0 73	0 52	0 48	0 41	0 7	0 15	0 17	0 24	0 15	0 21	0 51	0 46	0 17	0 20	0 16	0 17	0 18	0 26	0 45	0 47	0 48	0 9	0 37	0 27	0 23	0 19	0 31	0 25	0 26	0 18	0 41	0 25	0 24	0 33	0 35	0 29
18	16208569	C	T	0 41	0 48	0 56	0 50	0 53	0 56	0 23	0 42	0 38	0 56	0 69	0 54	0 48	0 44	0 8	0 15	0 18	0 26	0 14	0 20	0 54	0 47	0 18	0 19	0 21	0 18	0 20	0 28	0 43	0 49	0 55	0 9	0 41	0 29	0 23	0 18	0 32	0 26	0 26	0 18	0 41	0 25	0 23	0 34	0 34	0 29
18	16208570	A	T	0 40	0 47	0 56	0 49	0 54	0 55	0 22	0 42	0 38	0 56	0 69	0 55	0 50	0 45	0 9	0 14	0 17	0 27	0 15	0 21	0 54	0 47	0 18	0 17	0 20	0 18	0 19	0 28	0 44	0 50	32 22	0 9	0 41	0 26	0 24	0 18	0 32	0 25	0 27	0 18	0 41	0 24	0 22	0 34	0 33	0 28
18	16208571	G	C	0 40	0 49	0 56	0 50	0 56	0 55	0 22	0 43	0 38	0 56	0 69	0 56	0 50	0 44	0 11	0 14	0 18	0 27	0 15	0 21	0 54	0 48	0 19	0 16	0 21	0 18	0 19	0 28	0 45	0 49	0 53	0 9	0 42	0 27	0 24	0 18	0 33	0 25	0 27	0 16	0 40	0 24	0 21	0 34	0 33	0 30
18	16208577	TCGAGGGT	CCGTGGGC	0 38	0 40	0 49	0 43	0 49	0 45	0 19	0 39	0 33	0 48	0 62	0 49	0 47	0 34	0 8	0 12	0 14	0 23	0 13	0 21	0 47	0 45	0 20	0 16	0 16	0 18	0 15	0 26	0 38	0 40	0 46	0 9	0 32	0 23	0 24	0 14	0 30	0 25	0 23	0 17	0 35	0 23	0 23	0 32	0 31	0 26
18	16208584	T	C	0 38	0 40	0 49	0 43	0 49	0 45	0 19	0 39	0 33	0 48	0 62	0 49	0 47	0 34	0 8	0 12	0 14	0 23	0 13	0 21	0 47	0 45	0 20	0 16	0 16	0 18	0 15	0 26	0 38	0 40	0 46	0 9	0 32	0 23	0 24	0 14	0 30	0 25	0 23	0 17	0 35	0 23	0 23	0 32	0 31	0 26
18	16208592	T	A	0 45	0 48	0 54	0 49	0 57	0 55	0 21	0 43	0 38	0 53	0 67	0 50	0 49	0 36	0 8	0 17	0 17	0 24	0 16	0 21	0 56	0 49	0 21	0 16	0 17	0 20	0 17	0 29	0 39	25 21	0 52	0 10	0 38	0 25	0 24	0 13	0 29	0 28	0 25	0 20	0 36	0 25	0 29	0 42	0 34	0 31
18	16208593	A	G	0 46	0 48	0 53	0 49	0 55	0 57	0 20	0 42	0 38	0 53	0 67	0 50	0 47	0 34	0 8	0 18	0 17	0 24	0 16	0 21	0 56	1 46	0 21	0 15	0 17	0 19	0 17	0 29	0 20	0 24	0 25	0 6	0 39	0 25	13 11	0 16	0 29	0 28	13 11	9 10	0 34	0 27	0 29	0 42	0 33	0 30
18	16208593	A	T	0 46	0 48	0 53	0 49	0 55	0 57	0 20	0 42	0 38	0 53	0 67	0 50	0 47	0 34	0 8	0 18	0 17	0 24	0 16	0 21	0 56	0 46	0 21	0 15	0 17	0 19	0 17	0 29	19 20	21 24	27 25	4 6	0 39	0 25	0 11	0 16	0 29	0 28	0 11	0 10	0 34	0 27	0 29	0 42	0 33	0 30
18	16208598	CCA	ACG	0 46	0 42	0 52	0 43	0 48	0 56	0 17	0 39	0 35	0 49	0 63	0 48	0 49	0 34	0 8	0 17	0 15	0 23	0 16	0 19	0 52	0 42	0 19	0 15	0 18	0 19	0 19	0 30	0 34	0 42	0 45	0 10	0 43	0 23	0 23	0 16	0 29	0 25	0 22	0 19	0 30	0 24	0 27	0 40	0 31	0 29
18	16208598	CCAATT	TCGATC	0 46	0 42	0 52	0 43	0 48	0 56	0 17	0 39	0 35	0 49	0 63	0 48	0 49	0 34	0 8	0 17	0 15	0 23	0 16	0 19	0 52	0 42	0 19	0 15	0 18	0 19	0 19	0 30	0 34	0 42	0 45	0 10	0 43	0 23	0 23	0 16	0 29	0 25	0 22	0 19	0 30	0 24	0 27	0 40	0 31	0 29
18	16208599	CA	TG	0 46	0 42	0 52	0 43	0 48	0 56	0 17	0 39	0 35	0 49	0 63	0 48	0 49	0 34	0 8	0 17	0 15	0 23	0 16	0 19	0 52	0 42	0 19	0 15	0 18	0 19	0 19	0 30	0 34	0 42	0 45	0 10	0 43	0 23	0 23	0 16	0 29	0 25	0 22	0 19	0 30	0 24	0 27	0 40	0 31	0 29
18	16208600	A	C	0 46	0 42	0 52	0 43	0 48	0 56	0 17	0 39	0 35	0 49	0 63	0 48	0 49	0 34	0 8	0 17	0 15	0 23	0 16	0 19	0 52	0 42	0 19	0 15	0 18	0 19	0 19	0 30	0 34	0 42	0 45	0 10	0 43	0 23	0 23	0 16	0 29	0 25	0 22	0 19	0 30	0 24	0 27	0 40	0 31	0 29
18	16208608	CT	TG	0 45	0 45	0 52	0 50	0 52	0 55	0 16	0 38	0 41	0 51	0 67	0 52	0 51	0 39	0 7	0 19	0 14	0 22	0 18	0 19	0 53	0 47	0 22	0 17	0 19	0 17	0 19	0 32	0 38	0 41	0 41	0 10	0 40	0 27	0 24	0 21	0 31	0 25	0 22	0 17	0 31	0 24	0 30	0 42	0 31	0 32
18	16208609	T	G	0 45	0 45	0 52	0 50	0 52	0 55	0 16	0 38	0 41	0 51	0 67	0 52	0 51	0 39	0 7	0 19	0 14	0 22	0 18	0 19	0 53	0 47	0 22	0 17	0 19	0 17	0 19	0 32	0 38	0 41	0 41	0 10	0 40	0 27	0 24	0 21	0 31	0 25	0 22	0 17	0 31	0 24	0 30	0 42	0 31	0 32
18	16208618	C	A	0 46	0 47	0 53	0 48	0 55	0 61	0 18	0 43	0 44	0 53	0 68	0 54	0 48	0 41	0 7	0 18	0 18	0 21	0 16	0 22	0 58	0 46	0 24	0 22	0 21	0 15	0 17	0 31	0 45	0 40	0 38	0 11	0 42	0 26	0 24	0 19	0 28	0 23	0 20	0 16	0 36	0 24	0 30	0 41	0 34	0 33
18	16208634	A	T	0 43	0 46	0 55	0 55	0 49	0 61	0 16	0 47	0 42	0 49	0 65	0 54	0 50	0 38	0 8	0 22	0 19	0 18	0 16	0 20	0 53	0 55	0 26	0 25	0 22	0 13	0 16	0 32	0 42	0 37	0 37	0 10	0 42	0 22	0 21	0 17	0 29	0 23	0 25	0 14	0 37	0 22	0 29	0 40	0 36	0 35
18	16208635	T	C	0 42	0 46	0 54	0 56	0 49	0 61	0 16	0 47	0 38	0 50	0 64	0 53	0 50	0 38	0 8	0 22	0 19	0 19	0 16	0 20	0 52	0 55	0 25	0 25	0 22	0 13	0 16	0 32	0 42	0 38	0 39	0 11	0 42	0 24	0 21	6 12	0 29	0 22	0 24	0 15	0 35	0 23	0 29	0 41	0 36	0 34
18	16208645	A	T	0 46	0 51	0 53	0 54	0 48	0 57	0 15	0 50	0 40	0 51	0 63	0 52	0 50	0 40	0 8	0 20	0 21	0 17	0 16	0 16	0 56	0 55	0 25	0 25	0 22	0 11	0 18	0 30	0 46	0 37	0 37	0 10	0 38	0 23	0 18	0 16	0 34	0 23	0 24	0 17	0 36	0 23	0 26	0 39	0 37	0 36
18	16208650	T	A	0 48	0 47	0 53	0 58	0 52	0 57	0 13	0 49	0 37	0 49	0 60	0 53	0 48	0 38	0 9	0 21	0 20	0 16	0 17	0 15	0 55	0 52	0 24	0 27	0 22	0 8	0 18	0 32	20 24	0 39	0 38	0 9	0 38	0 24	0 18	0 16	0 35	0 22	0 24	0 18	0 34	0 21	0 28	0 37	0 36	0 35
18	16208654	T	C	0 48	0 46	0 51	0 58	0 53	0 55	0 11	0 51	0 37	0 47	0 62	0 52	0 48	0 37	0 10	0 21	0 19	0 15	0 17	0 15	0 54	0 47	0 22	0 27	0 21	0 8	0 15	0 30	0 45	0 41	0 34	0 10	0 37	0 25	0 19	0 16	0 36	0 23	0 24	0 17	0 37	0 23	0 28	0 36	0 39	0 35
18	16208662	T	C	0 49	0 48	0 52	0 60	0 52	0 59	0 10	0 52	0 38	0 46	0 58	0 50	0 51	0 40	0 10	0 23	0 17	0 16	0 17	0 13	0 58	0 49	0 24	0 30	0 19	0 7	0 16	0 30	0 43	0 45	0 31	0 10	0 36	0 24	0 16	0 16	0 33	0 24	0 21	0 16	0 33	0 22	0 25	0 31	0 37	0 32
18	16208671	T	G	0 48	0 49	0 51	0 55	0 53	0 61	0 13	0 54	0 39	0 44	0 58	0 46	0 54	0 38	0 6	0 24	0 17	0 13	0 14	0 12	0 51	0 47	0 23	0 29	0 17	0 7	0 18	0 25	0 48	0 45	0 32	0 11	0 39	0 24	0 17	0 15	0 35	0 25	0 24	0 18	0 37	0 26	0 29	0 31	0 37	0 33
18	16208673	T	C	0 48	0 51	0 52	0 53	0 54	0 62	0 12	0 53	0 38	0 44	0 59	0 45	0 56	0 38	0 6	0 23	0 18	0 13	0 14	0 11	0 53	0 48	0 23	0 28	0 17	0 7	0 18	0 24	0 45	0 45	0 31	0 11	0 38	0 23	0 17	0 16	0 36	0 24	0 23	0 17	0 36	0 26	10 20	0 32	0 37	0 33
18	16208675	T	C	0 45	0 52	0 51	0 52	0 52	0 61	0 13	0 53	0 39	0 44	0 58	0 45	0 56	0 39	0 6	0 23	0 19	0 13	0 14	0 12	0 54	21 28	0 22	0 28	0 17	0 7	0 18	0 25	0 45	0 45	0 33	0 11	0 38	0 23	0 17	0 16	0 35	0 24	0 23	0 18	0 35	0 26	0 30	0 32	0 35	0 34
18	16208681	T	C	0 43	0 50	0 49	0 51	0 54	0 58	0 13	0 50	0 39	0 46	0 56	0 46	0 59	0 38	0 6	0 20	0 20	0 12	0 15	0 12	0 51	0 48	0 22	0 28	0 16	0 8	0 18	0 27	0 43	0 46	11 20	0 11	0 38	0 22	0 18	0 15	0 35	0 26	0 23	0 19	0 35	0 26	0 30	0 35	0 36	0 33
18	16208685	A	G	0 41	0 50	0 51	0 48	0 55	0 58	0 14	0 49	0 37	0 44	0 55	0 47	0 57	0 41	0 6	0 21	0 19	0 12	0 15	0 12	0 50	0 49	0 22	0 29	0 17	0 9	0 19	0 28	0 42	0 44	0 34	0 11	0 37	0 22	0 16	0 14	0 34	0 26	0 21	0 19	0 36	0 25	0 30	0 37	0 36	17 16
18	16208690	GGA	AGG	0 39	0 49	0 50	0 50	0 50	0 53	0 17	0 48	0 34	0 44	0 55	0 45	0 57	0 41	0 6	0 18	0 19	0 10	0 13	0 13	0 46	0 48	0 21	0 28	0 16	0 8	0 20	0 27	0 44	0 44	0 38	0 12	0 35	0 24	0 17	0 15	0 35	0 26	0 23	0 19	0 36	0 25	0 30	0 39	0 33	0 33
18	16208697	T	C	0 37	0 51	0 48	0 52	0 52	0 55	0 18	0 49	0 31	0 46	0 58	0 42	0 56	0 40	0 6	0 18	0 20	0 11	0 14	0 14	0 50	0 50	0 19	0 31	0 16	0 8	0 21	0 26	21 23	0 42	0 36	0 15	0 39	0 25	0 17	0 15	0 39	0 26	0 23	0 19	0 35	0 25	0 30	0 39	0 30	0 34
18	16208705	G	C	0 38	0 52	0 52	0 50	0 52	0 56	0 21	0 56	0 31	0 46	0 56	0 43	0 55	0 38	0 5	0 17	0 21	0 12	0 14	0 16	0 49	0 46	0 21	0 32	0 14	0 9	0 23	0 23	0 46	0 44	0 36	0 15	0 38	0 26	0 17	0 15	0 38	0 22	0 23	0 18	0 31	0 23	0 30	0 35	0 27	0 34
18	16208707	A	T	0 36	0 51	0 51	0 52	0 53	0 55	0 21	0 57	0 31	0 47	0 56	0 42	0 57	0 36	0 5	0 19	0 20	0 11	0 13	0 16	0 50	0 45	0 18	0 33	0 14	0 9	0 22	0 23	0 45	0 45	0 35	0 15	0 39	0 26	0 17	0 15	0 37	0 22	0 23	0 17	0 31	0 23	0 30	0 35	0 26	0 33
18	16208710	C	T	0 36	0 47	0 51	0 51	0 52	0 55	0 21	0 58	0 30	0 45	0 56	0 45	0 54	0 33	0 5	0 19	0 19	0 10	0 15	0 16	0 51	0 46	0 18	0 32	0 12	0 9	0 22	0 24	0 46	0 47	0 36	0 15	0 40	0 25	0 18	0 16	0 35	0 22	0 22	0 18	0 32	0 23	0 28	0 35	0 24	0 34
18	16208714	C	CTTGCTAATTATCTTATTCAA	0 27	0 33	0 37	0 30	0 32	0 34	0 19	0 34	0 21	0 32	0 40	0 29	0 31	0 23	0 2	0 12	0 11	0 7	0 6	0 10	0 36	0 25	0 9	0 22	0 8	0 5	0 16	0 18	0 32	0 17	2 8	0 4	0 30	0 20	0 6	0 0	0 20	0 16	0 6	0 6	0 28	0 18	0 16	0 22	4 9	0 26
18	16208726	C	G	0 27	0 33	0 37	0 30	0 32	0 34	0 19	0 34	0 21	0 32	0 40	0 29	0 31	0 23	0 2	0 12	0 11	0 7	0 6	0 10	0 36	0 25	0 9	0 22	0 8	0 5	0 16	0 18	0 32	0 17	0 8	0 4	0 30	0 20	9 6	12 0	13 20	0 16	10 6	7 6	0 28	0 18	0 16	0 22	0 9	0 26
18	16208734	A	ATTGCTAATTATCTTATTCAG	0 27	0 33	0 37	0 30	0 32	0 34	0 19	0 34	0 21	0 32	0 40	0 29	0 31	0 23	0 2	0 12	0 11	0 7	0 6	0 10	0 36	0 25	0 9	0 22	0 8	0 5	0 16	0 18	0 32	0 17	0 8	0 4	0 30	0 20	0 6	0 0	0 20	0 16	0 6	0 6	0 28	0 18	0 16	0 22	0 9	0 26
18	16208734	A	G	0 27	0 33	0 37	0 30	0 32	0 34	0 19	0 34	0 21	0 32	0 40	0 29	0 31	0 23	0 2	0 12	0 11	0 7	0 6	0 10	0 36	0 25	0 9	0 22	0 8	0 5	0 16	0 18	0 32	17 17	0 8	8 4	0 30	0 20	0 6	0 0	0 20	0 16	0 6	0 6	0 28	0 18	0 16	0 22	0 9	0 26
18	16208736	ACTGTCCA	TCTCTCCT	0 27	0 33	0 37	0 30	0 32	0 34	0 19	0 34	0 21	0 32	0 40	0 29	0 31	0 23	0 2	0 12	0 11	0 7	0 6	0 10	0 36	0 25	0 9	0 22	0 8	0 5	0 16	0 18	0 32	0 17	0 8	0 4	0 30	0 20	0 6	0 0	0 20	0 16	0 6	0 6	0 28	0 18	0 16	0 22	0 9	0 26
18	16208751	G	A	0 43	0 41	0 58	0 43	0 48	0 45	0 27	0 49	0 30	0 46	0 56	0 43	0 54	0 35	0 6	0 17	0 21	0 11	0 18	0 19	0 49	0 40	0 17	0 23	0 7	0 9	0 21	0 24	0 51	0 37	0 34	0 13	0 34	0 26	0 22	0 14	0 36	0 22	0 19	0 18	0 33	0 23	0 19	0 25	0 23	0 29
18	16208752	TTA	T	0 41	0 41	0 53	0 39	0 46	0 46	0 26	0 46	0 30	0 46	0 53	0 42	0 51	0 32	0 5	0 15	0 20	0 9	0 18	0 17	0 49	0 39	0 18	0 23	0 7	0 9	0 21	0 23	0 49	0 33	0 34	0 13	0 33	0 24	0 22	0 12	0 35	0 21	0 19	0 18	0 33	0 22	0 18	0 24	9 11	0 28
18	16208765	A	T	0 40	0 40	0 54	0 42	0 48	0 45	0 22	0 44	0 34	0 49	0 63	0 43	0 48	0 34	0 5	0 19	0 20	0 10	0 18	0 20	0 52	0 41	0 17	0 23	0 7	0 10	0 15	0 23	0 49	0 34	0 34	0 12	0 39	0 23	0 18	0 14	0 35	0 20	0 17	0 18	0 30	0 25	0 20	0 28	0 21	0 29
18	16208770	G	A	0 39	0 37	0 54	0 42	0 44	0 45	0 21	0 44	0 36	0 52	0 63	0 44	0 49	0 36	0 6	0 18	0 19	0 14	0 21	0 23	0 50	0 42	0 17	0 25	0 6	0 11	0 15	0 24	25 25	20 14	0 33	7 8	0 38	0 22	0 20	0 13	0 35	0 19	0 17	0 18	0 31	0 25	0 20	0 27	0 19	0 29
18	16208774	TCGAA	GCGAG	0 38	0 36	0 52	0 40	0 44	0 44	0 21	0 45	0 35	0 50	0 61	0 39	0 46	0 38	0 6	0 18	0 16	0 15	0 19	0 22	0 46	0 41	0 18	0 26	0 6	0 11	0 15	0 18	0 49	0 31	0 33	0 14	0 38	0 23	0 19	0 14	0 36	0 18	0 15	0 18	0 31	0 24	0 18	0 26	0 17	0 26
18	16208789	C	T	0 40	0 39	0 50	0 44	0 44	0 55	0 15	0 51	0 39	0 50	0 61	0 43	0 45	0 37	0 10	0 18	0 18	0 19	0 17	0 26	0 47	0 47	0 19	0 22	0 8	0 9	0 13	0 22	0 48	0 34	0 34	0 11	0 34	0 25	0 19	0 13	0 35	0 18	0 15	0 18	0 29	0 26	0 16	0 27	12 6	0 28
18	16208790	A	G	0 40	0 41	0 48	0 44	0 43	0 55	0 14	0 50	0 38	0 47	0 58	0 43	0 44	0 36	0 10	0 19	0 17	0 19	0 17	0 24	0 46	0 46	0 20	0 22	0 7	0 9	0 13	0 23	0 49	0 31	0 32	0 12	20 14	24 0	20 0	13 0	33 0	18 0	16 0	17 0	30 0	23 0	17 0	26 0	6 12	27 0
18	16208790	AGT	GGC	0 40	0 41	0 48	0 44	0 43	0 55	0 14	0 50	0 38	0 47	0 58	0 43	0 44	0 36	0 10	0 19	0 17	0 19	0 17	0 24	0 46	0 46	0 20	0 22	0 7	0 9	0 13	0 23	0 49	0 31	0 32	0 12	0 14	0 0	0 0	0 0	0 0	0 0	0 0	0 0	0 0	0 0	0 0	0 0	0 12	0 0
18	16208793	G	A	0 39	0 41	0 50	0 44	0 44	0 55	0 14	0 51	0 40	0 47	0 60	0 42	0 44	0 37	0 10	0 18	0 18	0 18	0 17	0 24	0 47	0 45	0 20	0 21	0 8	0 9	0 13	0 24	0 48	0 33	0 34	0 11	0 33	0 25	0 20	0 13	0 33	0 18	0 16	0 17	0 30	0 25	0 17	0 26	0 18	0 26
18	16208814	C	T	0 41	0 47	0 42	0 52	0 52	0 52	0 12	0 42	0 39	0 51	0 63	0 42	0 48	0 42	0 13	0 17	0 19	0 18	0 18	0 22	0 49	0 52	0 21	0 14	0 8	0 12	0 9	0 26	0 42	0 33	0 34	0 14	0 33	0 23	0 26	0 16	0 30	0 16	0 20	0 15	0 35	0 24	0 19	0 29	0 23	0 32
18	16208821	C	T	0 36	0 49	0 37	0 51	0 53	0 50	0 12	0 36	0 38	0 48	0 61	0 44	0 44	0 45	0 12	0 17	0 20	0 17	0 17	0 24	0 50	0 53	0 20	0 15	0 10	0 12	0 8	0 26	0 47	0 36	0 34	0 14	22 11	23 0	27 0	15 0	29 0	15 0	18 0	18 0	35 0	25 0	17 0	29 0	8 15	31 0
18	16208829	T	C	0 39	0 50	0 37	0 52	0 50	0 50	0 11	0 37	0 38	0 50	0 68	0 46	0 43	0 46	0 13	0 15	0 18	0 20	0 19	0 22	0 49	0 52	0 20	0 18	0 10	0 12	0 8	0 27	0 41	0 33	0 31	0 15	0 35	0 23	0 27	0 16	0 26	0 17	0 19	0 16	0 36	0 25	0 17	0 30	0 24	0 33
18	16208841	A	G	0 40	0 48	0 35	0 47	0 48	0 50	0 9	0 33	0 42	0 51	0 68	0 43	0 42	0 44	0 14	0 16	0 18	0 22	0 17	0 22	0 51	0 53	0 19	0 16	0 12	0 11	0 10	0 31	0 45	0 36	0 30	0 17	0 33	0 23	0 22	0 18	0 24	0 20	0 18	0 16	0 36	0 28	0 15	0 27	0 25	0 34
18	16208864	A	G	0 40	0 51	0 33	0 44	0 44	0 52	0 12	0 32	0 33	0 48	0 59	0 45	0 37	0 45	0 12	0 13	0 15	0 22	7 15	8 12	0 45	0 46	0 18	0 18	0 10	0 15	0 9	0 32	0 45	0 42	0 29	0 18	0 33	0 23	0 22	0 18	0 24	0 23	0 19	0 18	0 34	0 26	0 16	0 28	0 27	0 29
18	16208875	G	T	0 39	0 52	0 33	0 41	0 45	0 48	0 10	0 28	0 31	0 40	0 58	0 45	0 37	0 42	0 11	0 14	0 17	0 18	0 18	0 16	0 41	0 40	0 19	0 17	0 11	0 17	0 11	0 30	0 47	0 39	11 16	0 18	0 30	0 25	0 20	0 20	0 24	0 25	0 17	0 16	0 32	0 26	0 13	0 28	0 25	0 27
18	16208893	T	C	0 43	0 45	0 31	0 35	0 39	0 42	0 12	0 28	0 29	0 46	0 60	0 42	0 37	0 39	0 7	0 16	0 15	0 17	0 21	0 13	0 38	0 39	0 26	0 20	0 8	0 18	0 13	0 27	0 45	0 37	8 18	0 18	0 34	0 19	0 19	0 21	0 27	0 22	0 21	0 16	0 30	0 27	0 17	0 31	0 21	0 27
18	16208915	T	C	0 37	0 44	0 33	0 30	0 30	0 44	0 18	0 26	0 23	0 43	0 52	0 42	0 37	0 38	0 4	0 20	0 16	0 16	0 18	0 13	0 35	0 32	0 27	0 22	0 9	0 14	0 14	0 23	0 44	0 40	0 24	0 14	0 36	0 25	0 22	0 16	0 24	0 24	0 26	0 16	0 29	0 25	0 18	0 27	0 23	0 32
18	16208923	T	C	0 36	0 42	0 38	0 31	0 31	0 46	0 19	0 26	0 22	0 45	0 47	0 41	0 37	0 37	0 4	0 19	0 16	0 17	0 18	0 12	0 34	0 32	0 28	0 20	0 9	0 14	0 13	0 24	0 41	0 42	0 27	0 14	0 36	0 27	0 22	0 16	0 23	0 27	0 24	0 17	0 33	0 25	0 22	0 26	0 25	0 30
18	16208925	A	C	0 34	0 42	0 36	0 31	0 32	0 49	0 21	0 26	0 22	0 45	0 45	0 41	0 37	0 37	0 4	0 20	0 16	0 15	0 19	0 12	0 34	0 32	0 27	0 18	0 9	0 13	0 12	0 21	0 40	0 43	0 27	0 14	0 36	0 26	0 22	0 15	0 23	0 28	0 25	0 17	0 33	0 25	0 22	0 24	0 23	0 29
18	16208937	G	A	0 32	0 42	0 37	0 31	0 30	0 48	0 21	0 30	0 18	0 43	0 41	0 38	0 32	0 33	0 5	0 19	0 15	0 13	0 18	0 16	0 30	0 28	0 28	0 21	0 9	0 14	0 11	0 18	0 35	0 42	0 26	0 14	0 33	0 24	0 24	0 17	0 22	0 30	0 25	0 16	0 29	0 23	0 23	0 25	0 22	0 29
18	16208944	A	G	0 28	0 44	0 32	0 32	0 31	0 48	0 23	0 29	0 20	0 44	0 38	0 38	0 32	0 34	0 3	0 20	0 14	0 12	0 17	0 16	0 25	0 29	0 28	0 19	0 9	0 14	0 11	0 18	0 32	0 43	0 22	0 14	0 33	0 24	0 23	0 19	0 22	0 29	0 24	0 17	0 30	0 23	0 23	0 26	0 22	0 30
18	16208948	C	T	0 26	0 42	0 33	0 32	0 29	0 48	0 25	0 31	0 19	0 45	0 39	0 37	0 31	0 34	0 3	0 21	0 14	0 12	0 16	0 15	0 24	0 27	0 30	0 18	0 9	0 12	0 17	0 23	0 31	26 13	0 22	9 6	0 30	0 24	0 22	0 19	0 21	0 31	0 23	0 19	0 28	0 25	0 23	0 25	0 21	0 26
18	16208952	TC	T	0 26	0 40	0 33	0 27	0 28	0 45	0 19	0 32	0 22	0 42	0 37	0 33	0 30	0 31	0 3	0 22	0 13	0 10	0 16	0 14	0 20	0 24	0 29	0 15	0 9	0 12	0 13	0 20	28 0	37 0	0 22	15 0	13 14	23 0	19 0	17 0	20 0	29 0	22 0	17 0	23 0	22 0	23 0	21 0	18 0	24 0
18	16208953	CA	T	0 26	0 40	0 33	0 27	0 28	0 45	0 19	0 32	0 22	0 42	0 37	0 33	0 30	0 31	0 3	0 22	0 13	0 10	0 16	0 14	0 20	0 24	0 29	0 15	0 9	0 12	0 13	0 20	0 0	0 0	0 22	0 0	0 14	0 0	0 0	0 0	0 0	0 0	0 0	0 0	0 0	0 0	0 0	0 0	0 0	0 0
18	16208969	A	C	0 27	0 35	0 29	0 26	0 24	0 41	0 24	0 32	0 23	0 40	0 36	0 33	0 31	0 29	0 3	0 19	5 6	7 4	0 11	9 5	0 30	0 26	29 0	19 0	7 0	6 6	1 9	11 11	0 26	0 43	0 26	0 15	0 28	0 24	0 17	0 17	0 21	0 30	0 21	0 16	0 21	0 23	0 17	0 24	0 19	0 27
18	16208970	C	T	0 25	0 37	0 31	0 25	0 22	0 41	0 24	0 32	0 24	0 41	0 35	0 34	0 30	0 29	0 3	0 18	0 12	0 11	0 11	0 14	0 30	0 27	0 29	0 20	0 7	0 12	0 10	0 22	11 15	16 28	0 27	6 9	0 29	0 24	0 16	0 17	0 20	0 30	0 21	0 15	0 21	0 23	0 17	0 25	0 19	0 26
18	16208992	A	T	0 18	0 32	0 32	0 25	0 24	0 37	0 22	0 31	0 25	0 39	0 30	0 24	0 26	0 30	0 3	0 20	0 8	0 7	0 11	0 18	0 30	0 25	0 20	0 19	0 8	0 12	0 15	0 21	0 23	25 13	0 27	8 6	0 25	0 25	0 18	0 16	0 21	0 28	0 23	0 14	0 20	0 24	0 19	0 19	0 21	0 29
18	16209000	T	C	0 17	0 29	0 30	0 23	0 22	0 35	0 19	0 33	0 24	0 37	0 29	0 23	0 24	0 30	0 4	0 16	0 6	0 8	0 11	0 15	0 29	0 23	0 17	0 16	0 6	0 12	0 16	0 20	0 14	0 30	0 26	0 11	0 23	0 27	0 18	0 18	0 20	0 25	0 25	0 12	0 21	0 24	0 20	0 18	0 21	0 32
18	16209000	TCA	CCG	0 17	0 29	0 30	0 23	0 22	0 35	0 19	0 33	0 24	0 37	0 29	0 23	0 24	0 30	0 4	0 16	0 6	0 8	0 11	0 15	0 29	0 23	0 17	0 16	0 6	0 12	0 16	0 20	0 14	0 30	0 26	0 11	0 23	0 27	0 18	0 18	0 20	0 25	0 25	0 12	0 21	0 24	0 20	0 18	0 21	0 32
18	16209002	A	G	0 17	0 29	0 30	0 23	0 22	0 35	0 19	0 33	0 24	0 37	0 29	0 23	0 24	0 30	0 4	0 16	0 6	0 8	0 11	0 15	0 29	0 23	0 17	0 16	0 6	0 12	0 16	0 20	10 14	0 30	0 26	0 11	0 23	0 27	0 18	0 18	0 20	0 25	0 25	0 12	0 21	0 24	0 20	0 18	0 21	0 32
18	16209009	TTG	T	0 19	0 27	0 31	0 20	0 21	0 32	0 15	0 32	0 24	0 35	0 30	0 23	0 23	0 30	0 5	0 15	0 8	0 8	0 13	0 14	0 27	0 24	0 15	0 17	0 6	0 12	0 18	0 19	0 23	0 30	0 24	0 11	0 22	0 27	0 20	0 17	0 19	0 26	0 24	0 12	0 20	0 22	0 22	0 17	0 20	0 33
18	16209035	A	G	0 23	0 28	0 26	0 22	0 21	0 30	0 15	0 31	0 24	0 29	0 26	0 21	0 25	0 31	0 5	0 14	0 8	0 7	7 5	7 6	0 26	0 24	0 12	0 16	0 3	0 13	8 8	0 18	0 27	0 29	0 21	0 10	0 22	0 25	0 20	0 17	0 17	0 24	0 24	0 19	0 21	0 22	0 25	0 14	0 21	0 36
18	16209059	T	C	0 25	0 28	0 25	0 25	0 25	0 27	0 10	0 31	0 20	0 26	0 27	0 22	0 23	0 30	0 6	0 12	0 11	0 7	0 14	0 11	0 29	0 25	0 13	0 14	0 7	0 10	0 17	0 17	0 29	0 27	0 19	0 9	0 25	0 20	0 17	0 16	0 23	0 26	0 19	0 15	0 18	0 19	0 24	0 16	0 16	0 34
18	16209063	G	A	0 25	0 29	0 26	0 27	0 26	0 27	0 10	0 31	0 18	0 26	0 29	0 22	0 24	0 30	0 6	0 12	0 11	0 7	0 15	0 13	0 31	0 25	0 13	0 14	0 7	0 10	0 17	0 16	16 14	9 16	0 22	3 6	0 24	0 19	0 18	0 16	0 23	0 26	0 18	0 14	0 16	0 20	0 24	0 16	0 16	0 33
18	16209070	A	C	0 23	0 29	0 27	0 28	0 26	0 28	0 8	0 29	0 18	0 23	0 30	0 22	0 25	0 33	0 7	0 11	0 11	0 7	0 15	0 13	0 29	0 23	0 11	0 11	0 7	0 9	0 10	0 16	0 30	0 27	0 25	0 9	0 22	0 20	0 19	0 17	0 22	0 25	0 18	0 14	0 18	0 20	0 24	0 15	0 13	0 34
18	16209074	T	A	0 26	0 30	0 24	0 28	0 25	0 28	0 9	0 28	0 19	0 20	0 31	0 22	0 23	0 32	0 6	0 11	0 12	0 7	0 13	0 11	0 32	0 24	0 11	0 11	0 5	0 7	0 9	0 18	0 30	0 27	0 23	0 9	0 23	0 19	0 19	0 18	0 22	0 24	0 19	0 13	0 18	0 20	0 23	0 17	0 13	0 34
18	16209089	T	A	0 28	0 29	0 28	0 28	0 26	0 26	0 8	0 27	0 17	0 23	0 36	0 23	0 27	0 30	0 6	0 10	0 13	0 7	0 13	0 14	0 31	0 25	0 14	0 9	0 6	0 6	0 6	0 16	0 30	19 14	0 18	7 2	0 21	21 0	17 0	19 0	23 0	20 0	21 0	13 0	25 0	21 0	23 0	19 0	16 0	35 0
18	16209100	CA	AC	0 29	0 32	0 30	0 30	0 27	0 24	0 9	0 23	0 15	0 23	0 32	0 21	0 29	0 28	0 5	0 8	0 10	0 7	0 12	0 12	0 27	0 25	0 14	0 7	0 7	0 6	0 9	0 12	0 29	0 31	0 20	0 8	0 18	0 20	0 17	0 18	0 23	0 23	0 20	0 12	0 25	0 21	0 23	0 18	0 15	0 33
18	16209107	G	A	0 27	0 32	0 29	0 33	0 30	0 26	0 8	0 23	0 16	0 23	0 32	0 19	0 27	0 27	0 5	0 7	0 10	0 7	0 10	0 12	0 27	0 25	0 15	0 6	0 8	0 7	0 9	0 12	13 15	12 16	0 23	1 7	0 19	0 20	0 16	0 17	0 22	0 22	0 21	0 12	0 25	0 21	0 23	0 17	0 15	0 31
18	16209110	C	G	0 21	0 30	0 26	0 27	0 25	0 24	0 6	0 19	0 12	0 21	0 29	0 15	0 24	0 8	0 4	0 5	0 8	0 7	0 7	0 8	0 23	0 16	0 12	0 3	0 8	0 6	0 5	0 11	0 12	0 0	0 20	7 0	0 15	0 19	0 18	0 15	0 22	0 20	0 16	0 12	0 24	0 17	0 24	0 14	0 7	0 24
18	16209110	CCATGATCGATTAGCCT	GCA	0 21	0 30	0 26	0 27	0 25	0 24	0 6	0 19	0 12	0 21	0 29	0 15	0 24	0 8	0 4	0 5	0 8	0 7	0 7	0 8	0 23	0 16	0 12	0 3	0 8	0 6	0 5	0 11	0 12	8 0	0 20	0 0	0 15	0 19	0 18	0 15	0 22	0 20	0 16	0 12	0 24	0 17	0 24	0 14	0 7	0 24
18	16209112	A	C	0 21	0 30	0 26	0 27	0 25	0 24	0 6	0 19	0 12	0 21	0 29	0 15	0 24	0 8	0 4	0 5	0 8	0 7	0 7	0 8	0 23	0 16	0 12	0 3	0 8	0 6	0 5	0 11	0 12	0 0	0 20	0 0	0 15	0 19	0 18	0 15	0 22	0 20	0 16	0 12	0 24	0 17	0 24	0 14	5 7	0 24
18	16209114	G	C	0 21	0 30	0 26	0 27	0 25	0 24	0 6	0 19	0 12	0 21	0 29	0 15	0 24	16 8	0 4	0 5	0 8	0 7	0 7	0 8	0 23	0 16	0 12	0 3	0 8	0 6	0 5	0 11	0 12	0 0	0 20	0 0	0 15	0 19	0 18	0 15	0 22	0 20	0 16	0 12	0 24	0 17	0 24	0 14	0 7	0 24
18	16209131	G	C	0 19	0 29	0 23	0 30	0 26	0 24	0 5	0 19	0 16	0 22	0 31	0 20	0 23	13 8	0 4	0 6	0 8	0 9	0 9	0 9	0 25	0 24	0 15	0 4	0 8	0 7	0 6	0 9	15 0	20 0	0 20	9 0	0 6	0 0	0 0	0 0	0 0	0 0	0 0	0 0	0 0	0 0	0 0	0 0	0 0	0 0
18	16209131	GGATC	CGATA	0 19	0 29	0 23	0 30	0 26	0 24	0 5	0 19	0 16	0 22	0 31	0 20	0 23	0 8	0 4	0 6	0 8	0 9	0 9	0 9	0 25	0 24	0 15	0 4	0 8	0 7	0 6	0 9	16 0	0 0	0 20	0 0	0 6	0 0	0 0	0 0	0 0	0 0	0 0	0 0	0 0	0 0	0 0	0 0	0 0	0 0
18	16209131	G	T	0 19	0 29	0 23	0 30	0 26	0 24	0 5	0 19	0 16	0 22	0 31	0 20	0 23	0 8	0 4	0 6	0 8	0 9	0 9	0 9	0 25	0 24	0 15	0 4	0 8	0 7	0 6	0 9	0 0	0 0	0 20	0 0	0 6	19 0	25 0	14 0	21 0	22 0	16 0	16 0	27 0	14 0	26 0	19 0	14 0	26 0
18	16209149	TTTCATTTTAG	CTTCAA	0 13	0 28	0 20	0 26	0 18	0 15	0 8	0 14	0 13	0 19	0 25	0 16	0 22	0 20	0 4	0 10	0 4	0 8	0 8	0 9	0 20	0 18	0 14	0 5	0 4	0 12	0 3	0 3	6 16	5 11	0 15	1 9	0 10	0 15	0 20	0 12	0 19	0 18	0 16	0 16	0 22	0 17	0 25	0 19	0 10	0 18
18	16209149	TTTCATTTTAG	GTTCAA	0 13	0 28	0 20	0 26	0 18	0 15	0 8	0 14	0 13	0 19	0 25	0 16	0 22	0 20	0 4	0 10	0 4	0 8	0 8	0 9	0 20	0 18	0 14	0 5	0 4	0 12	0 3	0 3	0 16	0 11	0 15	0 9	0 10	0 15	0 20	0 12	0 19	0 18	0 16	0 16	0 22	0 17	0 25	0 19	0 10	0 18
18	16209152	CATTTT	C	0 13	0 28	0 20	0 26	0 18	0 15	0 8	0 14	0 13	0 19	0 25	0 16	0 22	0 20	0 4	0 10	0 4	0 8	0 8	0 9	0 20	0 18	0 14	0 5	0 4	0 12	0 3	0 3	0 16	0 11	0 15	0 9	0 10	0 15	0 20	0 12	0 19	0 18	0 16	0 16	0 22	0 17	0 25	0 19	0 10	0 18
18	16209165	TAAAAAAATTAG	ATAAAAAATTAA	0 9	0 22	0 19	0 22	0 20	0 15	0 7	0 15	0 17	0 23	0 20	0 16	0 20	0 19	0 3	0 12	0 3	0 8	0 5	0 8	0 17	0 17	0 14	0 7	0 5	0 14	0 2	0 1	6 0	5 13	0 18	1 9	0 9	0 14	0 19	0 9	0 15	0 16	0 11	0 12	0 20	0 17	0 20	0 18	0 7	0 15
18	16209165	T	TA	0 9	0 22	0 19	0 22	0 20	0 15	0 7	0 15	0 17	0 23	0 20	0 16	0 20	0 19	0 3	0 12	0 3	0 8	0 5	0 8	0 17	0 17	0 14	0 7	0 5	0 14	0 2	0 1	0 0	0 13	0 18	0 9	0 9	0 14	0 19	0 9	0 15	0 16	0 11	0 12	0 20	0 17	0 20	0 18	0 7	0 15
18	16209171	AATTAG	CATTAA	0 9	0 22	0 19	0 22	0 20	0 15	0 7	0 15	0 17	0 23	0 20	0 16	0 20	0 19	0 3	0 12	0 3	0 8	0 5	0 8	0 17	0 17	0 14	0 7	0 5	0 14	0 2	0 1	0 0	0 13	0 18	0 9	0 9	0 14	0 19	0 9	0 15	0 16	0 11	0 12	0 20	0 17	0 20	0 18	0 7	0 15
18	16209174	T	G	0 9	0 22	0 19	0 22	0 20	0 15	0 7	0 15	0 17	0 23	0 20	0 16	0 20	0 19	0 3	0 12	0 3	0 8	0 5	0 8	0 17	0 17	0 14	0 7	0 5	0 14	0 2	0 1	17 0	0 13	0 18	0 9	0 9	0 14	0 19	0 9	0 15	0 16	0 11	0 12	0 20	0 17	0 20	0 18	0 7	0 15
18	16209176	G	C	0 9	0 22	0 19	0 22	0 20	0 15	0 7	0 15	0 17	0 23	0 20	0 16	0 20	0 19	0 3	0 12	0 3	0 8	0 5	0 8	0 17	0 17	0 14	0 7	0 5	0 14	0 2	0 1	0 0	0 13	0 18	0 9	0 9	0 14	0 19	0 9	0 15	0 16	0 11	0 12	0 20	0 17	0 20	0 18	0 7	0 15
18	16209182	TC	T	0 8	0 26	0 23	0 22	9 13	0 16	4 5	0 14	0 19	0 25	0 21	0 19	0 26	0 21	0 3	0 14	0 4	0 11	0 4	0 6	0 19	0 20	0 15	0 9	0 4	0 17	0 2	0 4	0 30	0 24	0 21	0 13	0 5	0 0	0 0	0 0	0 0	0 0	0 0	0 0	0 0	0 0	0 0	0 0	0 0	0 0
18	16209183	C	T	0 8	0 26	0 23	0 22	0 13	0 16	0 5	0 14	0 19	0 25	0 21	0 19	0 26	0 21	0 3	0 14	0 4	0 11	0 4	0 6	0 19	0 20	0 15	0 9	0 4	0 17	0 2	0 4	0 30	0 24	0 21	0 13	6 5	14 0	18 0	9 0	15 0	13 0	12 0	9 0	21 0	16 0	18 0	17 0	7 0	14 0
18	16209185	GCATA	ACAATT	0 5	0 20	0 15	0 14	0 15	0 12	0 7	0 10	0 13	0 21	0 15	0 16	0 19	0 18	0 2	0 13	0 3	0 11	0 5	0 5	0 16	0 17	0 13	0 9	0 3	0 16	0 2	0 4	0 0	0 0	0 14	0 0	0 4	0 0	0 0	0 0	0 0	0 0	0 2	0 0	0 0	0 0	0 0	0 0	0 0	0 0
18	16209189	A	AC	0 5	0 20	0 15	0 14	0 15	0 12	0 7	0 10	0 13	0 21	0 15	0 16	0 19	0 18	0 2	0 13	0 3	0 11	0 5	0 5	0 16	0 17	0 13	0 9	0 3	0 16	0 2	0 4	16 0	0 0	0 14	0 0	0 4	0 0	0 0	0 0	0 0	0 0	0 2	0 0	0 0	0 0	0 0	0 0	0 0	0 0
18	16209189	A	AT	0 5	0 20	0 15	0 14	0 15	0 12	0 7	0 10	0 13	0 21	0 15	0 16	0 19	0 18	0 2	0 13	0 3	0 11	0 5	0 5	0 16	0 17	0 13	0 9	0 3	0 16	0 2	0 4	11 0	17 0	0 14	10 0	6 4	11 0	16 0	7 0	8 0	11 0	9 2	10 0	21 0	15 0	14 0	14 0	5 0	10 0
18	16209196	T	TG	0 5	0 20	0 15	0 14	0 15	0 12	0 7	0 10	0 13	0 21	0 15	0 16	0 19	0 18	0 2	0 13	0 3	0 11	0 5	0 5	0 16	0 17	0 13	0 9	0 3	0 16	0 2	0 4	0 0	0 0	0 14	0 0	0 4	0 0	0 0	0 0	0 0	0 0	0 2	0 0	0 0	0 0	0 0	0 0	0 0	0 0
18	16209202	CT	C	0 5	0 19	0 15	0 13	0 14	0 10	0 7	0 10	0 15	0 21	0 14	0 16	0 21	0 23	0 2	0 13	0 3	0 11	0 6	0 4	0 16	0 17	0 13	0 9	0 3	0 20	0 2	0 5	16 11	0 21	0 15	0 11	0 9	0 13	0 17	0 7	0 7	0 14	0 13	0 10	0 22	0 16	0 17	0 14	0 6	0 10
18	16209217	C	G	0 4	0 19	0 14	0 10	0 13	0 9	0 8	0 10	0 11	0 19	0 13	0 15	0 19	0 5	0 1	0 13	0 3	0 10	0 5	0 2	0 14	0 14	0 12	0 8	0 3	0 19	0 2	0 5	11 17	11 10	0 16	5 7	0 8	0 12	0 15	0 6	0 7	0 12	0 14	0 10	0 18	0 16	0 18	0 16	0 6	0 9
18	16209217	C	T	0 4	0 19	0 14	0 10	0 13	0 9	0 8	0 10	0 11	0 19	0 13	0 15	0 19	18 5	0 1	0 13	0 3	0 10	0 5	0 2	0 14	0 14	0 12	0 8	0 3	0 19	0 2	0 5	0 17	0 10	0 16	0 7	0 8	0 12	0 15	0 6	0 7	0 12	0 14	0 10	0 18	0 16	0 18	0 16	0 6	0 9
18	16209224	C	A	0 3	0 17	0 14	0 10	0 12	0 8	0 8	0 9	0 10	0 19	0 11	0 15	0 20	0 21	0 1	0 12	0 3	0 9	0 5	0 2	0 13	0 13	0 13	0 8	0 3	0 20	0 1	0 4	0 27	10 13	0 16	7 5	6 1	13 0	17 0	6 0	7 0	11 0	14 0	10 0	17 0	16 0	16 0	15 0	6 0	8 0
18	16209230	A	C	0 3	0 13	0 13	0 8	0 10	0 7	0 7	0 10	0 10	0 17	0 11	0 14	0 19	0 21	0 1	0 10	0 3	0 6	0 3	0 2	0 13	0 10	0 12	0 7	0 3	0 19	0 1	0 5	12 17	12 11	0 13	5 6	0 6	0 11	0 15	0 1	0 4	0 12	0 14	0 9	0 20	0 14	0 16	0 15	0 6	0 7
18	16209230	AATT	CACC	0 3	0 13	0 13	0 8	0 10	0 7	0 7	0 10	0 10	0 17	0 11	0 14	0 19	0 21	0 1	0 10	0 3	0 6	0 3	0 2	0 13	0 10	0 12	0 7	0 3	0 19	0 1	0 5	0 17	0 11	0 13	0 6	0 6	0 11	0 15	0 1	0 4	0 12	0 14	0 9	0 20	0 14	0 16	0 15	0 6	0 7
18	16209243	TTCT	CTTTTTTCC	0 2	0 7	0 11	0 5	0 10	0 5	0 4	0 4	0 10	0 15	0 9	0 11	0 16	0 4	0 0	0 7	0 2	0 6	0 3	0 2	0 9	0 8	0 10	0 10	0 3	0 14	0 0	0 5	0 25	0 16	0 9	0 10	0 5	0 9	0 13	0 1	0 3	0 8	0 11	0 12	0 16	0 11	0 14	0 13	0 6	0 9
18	16209245	C	A	0 2	0 7	0 11	0 5	0 10	0 5	0 4	5 4	0 10	0 15	0 9	0 11	0 16	0 4	0 0	0 7	0 2	0 6	0 3	0 2	0 9	0 8	0 10	0 10	0 3	0 14	0 0	0 5	0 25	0 16	0 9	0 10	0 5	0 9	0 13	0 1	0 3	0 8	0 11	0 12	0 16	0 11	0 14	0 13	0 6	0 9
18	16209250	T	C	0 2	0 7	0 11	0 5	0 10	0 5	0 4	0 9	0 10	0 15	0 11	0 11	0 15	0 4	0 0	0 7	0 2	0 6	0 3	0 2	0 9	0 8	0 10	0 10	0 3	0 13	0 0	0 5	0 30	8 10	0 9	0 10	0 5	0 10	0 13	0 1	0 3	0 8	0 13	0 13	0 17	0 11	0 17	0 13	0 6	0 11
18	16209252	C	A	0 2	0 7	0 11	0 5	0 10	0 5	0 4	0 9	0 10	0 14	0 11	0 10	0 15	0 4	0 0	0 7	0 2	0 6	0 3	0 2	0 9	5 3	0 9	0 9	0 3	0 13	0 0	0 5	0 28	0 18	0 7	0 10	0 5	0 10	0 12	0 1	0 3	0 9	0 12	0 13	0 16	0 11	0 17	0 14	0 6	0 12
18	16209254	C	A	0 2	0 6	0 10	0 4	0 10	0 5	0 4	0 8	0 10	0 13	0 10	0 10	0 15	0 4	0 0	0 7	0 2	0 5	0 3	0 2	0 8	0 8	0 9	0 10	0 3	0 12	0 0	0 5	0 9	0 17	0 6	0 10	0 4	0 10	0 13	0 1	0 3	0 8	0 13	0 14	0 16	0 11	0 17	0 13	0 7	1 11
18	16209254	C	T	0 2	0 6	0 10	0 4	0 10	0 5	0 4	0 8	0 10	0 13	0 10	0 10	0 15	0 4	0 0	0 7	0 2	0 5	0 3	0 2	0 8	0 8	0 9	0 10	0 3	0 12	0 0	0 5	19 9	0 17	0 6	0 10	0 4	0 10	0 13	0 1	0 3	0 8	0 13	0 14	0 16	0 11	0 17	0 13	0 7	0 11
18	16209255	G	A	0 2	0 6	0 9	0 4	0 8	0 3	0 4	2 3	5 3	0 12	0 9	0 8	0 11	0 4	0 0	0 5	0 2	0 5	0 2	0 2	0 5	0 7	0 8	0 9	0 2	4 8	0 0	0 5	0 26	0 15	0 6	0 9	0 4	0 8	0 12	0 0	0 2	0 9	0 11	0 15	0 15	0 11	0 16	0 14	0 7	0 12
18	16209255	GTAA	ATAG	0 2	0 6	0 9	0 4	0 8	0 3	0 4	0 3	0 3	0 12	0 9	0 8	0 11	0 4	0 0	0 5	0 2	0 5	0 2	0 2	0 5	0 7	0 8	0 9	0 2	0 8	0 0	0 5	0 26	0 15	0 6	0 9	0 4	0 8	0 12	0 0	0 2	0 9	0 11	0 15	0 15	0 11	0 16	0 14	0 7	0 12
18	16209265	AATATATATATATATATATATATATAT	A	0 0	0 0	0 0	0 0	0 0	0 0	0 0	0 0	1 0	0 0	0 0	0 0	0 0	0 0	0 0	0 0	0 0	0 0	0 0	0 0	0 0	0 0	0 0	1 0	1 0	2 0	0 0	0 0	0 0	0 0	0 0	0 0	0 0	0 0	0 0	0 0	0 0	0 0	0 0	0 0	0 0	0 0	0 0	0 0	0 0	0 0
18	16209265	AATATATATATATATATAT	A	0 0	0 0	0 0	0 0	0 0	0 0	0 0	0 0	0 0	0 0	2 0	0 0	0 0	0 0	0 0	0 0	0 0	0 0	0 0	0 0	0 0	0 0	0 0	0 0	0 0	0 0	0 0	0 0	0 0	0 0	0 0	0 0	0 0	0 0	0 0	0 0	0 0	0 0	0 0	0 0	0 0	0 0	0 0	0 0	0 0	0 0
18	16209317	A	G	0 2	0 5	0 9	0 4	0 13	0 9	0 7	0 9	0 8	0 8	0 8	0 2	0 8	0 17	0 2	0 2	0 1	0 2	0 8	0 5	0 4	0 4	0 5	0 5	0 9	0 10	1 9	0 2	0 0	0 0	0 3	0 0	0 4	6 0	2 0	4 0	3 0	10 0	1 0	6 0	17 0	7 0	13 0	11 0	2 0	11 0
18	16209317	AA	TC	0 2	0 5	0 9	0 4	0 13	0 9	0 7	0 9	0 8	0 8	0 8	0 2	0 8	0 17	0 2	0 2	0 1	0 2	0 8	0 5	0 4	0 4	0 5	0 5	0 9	0 10	0 9	0 2	0 0	0 0	0 3	0 0	0 4	0 0	4 0	0 0	0 0	0 0	0 0	6 0	0 0	0 0	1 0	4 0	0 0	1 0
18	16209320	T	A	0 2	0 5	0 10	0 5	0 12	0 10	0 7	0 8	0 8	0 9	0 7	0 3	0 8	0 17	0 2	0 2	0 2	0 3	0 8	2 4	0 5	0 4	0 5	0 5	0 9	0 10	3 8	0 2	0 6	0 3	0 2	0 0	0 4	0 6	0 6	0 4	0 3	0 10	0 1	0 12	0 17	0 7	0 14	0 15	0 1	0 12
18	16209325	C	T	1 2	0 7	0 13	0 5	0 16	0 13	0 7	0 11	0 9	0 10	0 12	0 4	0 9	0 18	0 1	2 0	0 4	0 3	0 8	0 4	0 5	0 4	0 5	0 6	0 10	0 10	0 13	0 3	0 0	0 0	0 3	0 0	4 0	0 6	0 6	0 4	0 3	0 9	0 0	0 12	0 17	0 7	0 15	0 15	1 1	0 12
18	16209327	CTGT	TTGA	0 2	0 7	0 13	0 5	0 16	0 13	0 7	0 11	0 9	0 10	0 12	0 4	0 9	0 18	0 1	0 0	0 4	0 3	0 8	0 4	0 5	0 4	0 5	0 6	0 10	0 10	0 13	0 3	5 0	0 0	0 3	0 0	0 0	0 6	0 6	0 4	0 3	0 9	0 0	0 12	0 17	0 7	0 15	0 15	0 1	0 12
18	16209329	G	A	0 2	0 7	0 13	0 5	0 16	0 13	0 7	0 11	0 9	0 10	0 12	0 4	0 9	0 18	0 1	0 0	0 4	0 3	0 8	0 4	0 5	0 4	0 5	0 6	0 10	0 10	0 13	0 3	1 0	3 0	0 3	0 0	0 0	0 6	0 6	0 4	0 3	0 9	1 0	0 12	0 17	0 7	0 15	0 15	0 1	0 12
18	16209333	C	T	0 3	0 8	0 15	0 8	0 18	0 14	0 6	0 13	0 10	0 12	0 13	0 4	0 9	0 21	0 2	0 2	0 6	0 4	0 9	0 7	0 6	0 5	0 7	0 6	0 11	0 12	4 12	0 3	0 6	0 3	0 3	0 0	0 5	0 6	0 6	0 4	0 3	0 10	0 1	0 12	0 17	0 7	0 15	0 15	0 2	0 12
18	16209334	GCGG	ACGT	0 1	0 0	0 10	0 9	0 18	0 15	0 8	0 14	0 10	0 13	0 13	0 4	0 9	18 2	0 2	0 2	0 5	0 4	0 8	0 7	0 6	0 2	0 7	0 7	0 10	0 12	0 16	0 3	0 5	0 0	0 3	0 0	0 5	0 6	0 6	0 4	0 3	0 10	0 1	0 12	0 17	0 7	0 15	0 15	0 2	0 12
18	16209334	G	C	2 1	4 0	5 10	0 9	0 18	0 15	0 8	0 14	0 10	0 13	0 13	0 4	0 9	0 2	0 2	0 2	0 5	0 4	0 8	0 7	0 6	3 2	0 7	0 7	0 10	0 12	0 16	0 3	0 5	0 0	0 3	0 0	0 5	0 6	0 6	0 4	0 3	0 10	0 1	0 12	0 17	0 7	0 15	0 15	0 2	0 12
18	16209335	CGGG	TGGA	0 1	0 0	0 10	0 9	0 18	0 15	0 8	0 14	0 10	0 13	0 13	0 4	0 9	0 2	0 2	0 2	0 5	0 4	0 8	0 7	0 6	0 2	0 7	0 7	0 10	0 12	0 16	0 3	1 5	3 0	0 3	0 0	0 5	0 6	0 6	0 4	0 3	0 10	0 1	0 12	0 17	0 7	0 15	0 15	0 2	0 12
18	16209341	A	C	0 4	0 9	0 18	0 8	0 19	0 15	0 10	0 16	6 4	0 14	0 13	0 6	0 10	0 21	0 2	0 2	0 7	0 4	0 9	0 8	0 7	0 7	0 9	0 8	0 10	0 10	0 17	0 4	0 6	0 3	0 3	0 0	0 11	0 0	0 2	0 0	0 0	0 0	0 0	0 5	0 0	0 0	0 1	0 4	0 0	0 1
18	16209343	CA	TG	0 5	0 9	0 18	0 8	0 18	0 15	0 10	0 16	0 10	0 14	0 13	0 7	0 10	0 20	0 2	0 2	0 7	0 4	0 9	0 9	0 7	0 5	0 8	0 10	0 10	0 10	0 17	0 4	6 0	3 0	3 0	0 0	0 12	0 0	0 0	0 0	0 0	0 0	0 0	0 0	0 0	0 0	0 0	0 0	0 0	0 0
18	16209347	C	T	0 5	0 10	0 20	0 9	0 18	0 15	0 10	0 15	0 10	0 16	0 14	0 7	0 10	19 3	0 2	0 2	0 7	0 4	0 10	0 8	0 8	0 7	0 8	0 10	0 10	0 10	0 17	0 4	0 6	0 3	0 3	0 0	0 12	0 0	0 0	0 0	0 0	0 0	0 0	0 0	0 0	0 0	0 0	0 0	0 0	0 0
18	16209354	A	G	0 5	0 12	0 20	0 10	14 7	0 19	6 3	10 6	7 4	0 19	0 15	0 9	0 10	20 3	0 2	0 2	0 7	0 4	1 9	5 6	0 8	3 5	0 9	0 10	0 10	7 4	5 12	0 4	6 0	3 0	2 0	0 0	0 14	0 0	0 0	0 0	0 0	0 0	0 0	0 0	0 0	0 0	0 0	0 0	0 0	0 0
18	16209356	T	G	0 5	0 12	0 21	0 10	0 21	0 19	0 10	0 18	0 11	0 19	0 15	0 9	0 10	0 24	0 2	0 2	0 7	0 4	0 10	0 11	0 8	0 9	7 2	8 2	2 8	4 7	4 13	3 1	0 6	0 3	0 2	0 0	0 13	0 0	0 0	0 0	0 0	0 0	0 0	0 0	0 0	0 0	0 0	0 0	0 0	0 0
18	16209363	A	G	0 5	0 12	0 21	0 9	0 21	0 19	0 8	0 18	0 10	0 20	0 14	0 9	0 10	0 24	0 2	0 2	0 7	0 4	0 11	0 9	0 9	0 6	0 8	0 9	0 10	0 12	0 17	0 4	0 0	8 0	0 0	1 0	1 14	0 0	0 0	0 0	0 0	0 0	0 0	0 0	0 0	0 0	0 0	0 0	3 0	0 0
18	16209363	ATGGA	GTGC	0 5	0 12	0 21	0 9	0 21	0 19	0 8	0 18	0 10	0 20	0 14	0 9	0 10	0 24	0 2	0 2	0 7	0 4	0 11	0 9	0 9	0 6	0 8	0 9	0 10	0 12	0 17	0 4	0 0	1 0	0 0	0 0	0 14	0 0	0 0	0 0	0 0	0 0	0 0	0 0	0 0	0 0	0 0	0 0	0 0	0 0
18	16209365	G	A	0 5	0 12	0 21	0 9	0 21	0 19	0 8	0 18	0 10	0 20	0 14	0 9	0 10	0 24	0 2	0 2	0 7	0 4	0 11	0 9	0 9	0 6	0 8	0 9	0 10	0 12	0 17	0 4	0 0	0 0	0 0	0 0	0 14	0 0	0 0	0 0	0 0	0 0	0 0	0 0	0 0	0 0	0 0	0 0	0 0	0 0
18	16209370	C	T	0 6	0 12	0 21	0 11	0 24	0 20	0 7	0 19	0 10	0 20	0 16	0 9	0 10	0 22	0 2	0 2	0 7	0 4	0 12	0 10	0 11	0 9	0 9	0 11	0 11	0 13	0 18	0 6	0 0	0 1	0 0	0 0	0 16	5 0	0 0	0 0	1 0	2 0	5 0	4 0	6 0	14 0	7 0	9 0	3 4	6 0
18	16209370	CATTG	TATTA	0 6	0 12	0 21	0 11	0 24	0 20	0 7	0 19	0 10	0 20	0 16	0 9	0 10	0 22	0 2	0 2	0 7	0 4	0 12	0 10	0 11	0 9	0 9	0 11	0 11	0 13	0 18	0 6	0 0	0 1	0 0	0 0	0 16	0 0	0 0	0 0	0 0	0 0	0 0	0 0	0 0	0 0	0 0	0 0	0 4	0 0
18	16209371	A	G	0 6	0 12	0 21	0 11	0 24	0 20	0 7	0 19	0 10	0 20	0 16	0 9	0 10	0 22	0 2	0 2	0 7	0 4	0 12	0 10	0 11	0 9	0 9	0 11	0 11	0 13	0 18	0 6	0 0	8 1	0 0	1 0	0 16	0 0	0 0	0 0	0 0	0 0	0 0	0 0	0 0	0 0	0 0	0 0	0 4	0 0
18	16209376	GAGC	TAGT	0 6	0 12	0 24	0 11	0 24	0 20	0 9	0 18	0 10	0 22	0 17	0 9	0 11	0 23	0 2	0 1	0 7	0 5	0 12	0 11	0 12	0 9	0 9	0 10	0 12	0 14	0 16	0 6	0 0	0 0	0 0	0 0	2 16	6 0	0 0	0 0	1 0	3 0	6 0	4 0	7 0	14 0	7 0	11 0	7 0	7 0
18	16209379	C	A	0 6	0 12	0 24	0 11	0 24	0 20	0 9	0 18	0 10	0 22	0 17	0 9	0 11	0 23	0 2	0 1	0 7	0 5	0 12	0 11	0 12	0 9	0 9	0 10	0 12	0 14	0 16	0 6	0 0	0 0	0 0	0 0	0 16	0 0	0 0	1 0	5 0	0 0	0 0	0 0	0 0	0 0	0 0	0 0	0 0	0 0
18	16209379	C	T	0 6	0 12	0 24	0 11	0 24	0 20	0 9	0 18	0 10	0 22	0 17	0 9	0 11	0 23	0 2	0 1	0 7	0 5	0 12	0 11	0 12	0 9	0 9	0 10	0 12	0 14	0 16	0 6	3 0	9 0	2 0	1 0	0 16	0 0	1 0	0 0	0 0	0 0	0 0	0 0	0 0	0 0	0 0	0 0	0 0	0 0
18	16209385	C	T	0 6	0 13	0 26	0 11	0 25	0 19	0 9	0 16	1 9	0 21	0 17	0 9	0 10	0 19	0 2	0 1	0 8	0 6	0 12	0 12	0 13	0 9	0 11	0 9	0 11	0 12	0 17	0 5	0 0	0 0	0 2	0 0	0 21	0 0	0 1	9 1	13 5	1 0	5 0	3 0	0 0	0 0	0 0	0 0	0 4	0 0
18	16209385	CATTG	TATTA	0 6	0 13	0 26	0 11	0 25	0 19	0 9	0 16	0 9	0 21	0 17	0 9	0 10	0 19	0 2	0 1	0 8	0 6	0 12	0 12	0 13	0 9	0 11	0 9	0 11	0 12	0 17	0 5	0 0	0 0	0 2	0 0	0 21	6 0	0 1	0 1	0 5	2 0	7 0	4 0	9 0	14 0	9 0	13 0	3 4	7 0
18	16209387	TTG	CTA	0 6	0 13	0 26	0 11	0 25	0 19	0 9	0 16	0 9	0 21	0 17	0 9	0 10	0 19	0 2	0 1	0 8	0 6	0 12	0 12	0 13	0 9	0 11	0 9	0 11	0 12	0 17	0 5	0 0	0 0	0 2	0 0	0 21	0 0	0 1	0 1	0 5	0 0	0 0	0 0	0 0	0 0	0 0	0 0	0 4	0 0
18	16209387	TTGTG	CTGTA	0 6	0 13	0 26	0 11	0 25	0 19	0 9	0 16	0 9	0 21	0 17	0 9	0 10	0 19	0 2	0 1	0 8	0 6	0 12	0 12	0 13	0 9	0 11	0 9	0 11	0 12	0 17	0 5	0 0	0 0	0 2	0 0	0 21	0 0	0 1	0 1	0 5	0 0	0 0	0 0	0 0	0 0	0 0	0 0	0 4	0 0
18	16209387	TTGTGG	CTGTGA	0 6	0 13	0 26	0 11	0 25	0 19	0 9	0 16	0 9	0 21	0 17	0 9	0 10	0 19	0 2	0 1	0 8	0 6	0 12	0 12	0 13	0 9	0 11	0 9	0 11	0 12	0 17	0 5	0 0	9 0	0 2	1 0	0 21	0 0	0 1	0 1	0 5	0 0	0 0	0 0	0 0	0 0	0 0	0 0	0 4	0 0
18	16209394	C	T	0 7	0 13	0 26	0 14	0 28	0 19	0 10	0 15	0 11	0 21	0 18	0 11	0 10	0 19	0 2	0 2	0 8	0 6	0 11	0 16	0 14	0 10	0 12	0 10	0 10	0 13	0 17	0 6	0 10	0 11	0 2	0 1	0 21	0 6	0 2	0 10	0 18	0 3	0 15	0 8	0 11	0 17	0 9	0 15	4 3	0 9
18	16209397	CACTGTAGCGCG	TACTATAGCGCA	0 6	0 10	0 21	0 13	0 7	0 11	0 3	0 5	0 3	0 14	0 15	0 12	0 4	0 2	0 0	0 1	0 7	0 5	0 6	0 14	0 12	0 9	0 10	0 9	0 8	0 6	0 11	0 6	0 10	9 0	0 1	1 0	0 17	0 0	0 0	0 0	0 0	0 0	0 0	0 0	0 0	0 0	0 0	0 0	0 0	0 0
18	16209397	CACTGTAGCGC	TACTGTAGCAT	0 6	0 10	0 21	0 13	0 7	0 11	0 3	0 5	0 3	0 14	0 15	0 12	0 4	0 2	0 0	0 1	0 7	0 5	0 6	0 14	0 12	0 9	0 10	0 9	0 8	0 6	0 11	0 6	0 10	0 0	0 1	0 0	0 17	0 0	0 0	0 0	0 0	0 0	0 0	0 0	0 0	0 0	0 0	0 0	0 0	0 0
18	16209401	G	A	0 6	0 10	0 21	0 13	0 7	0 11	0 3	0 5	0 3	0 14	0 15	0 12	0 4	0 2	0 0	0 1	0 7	0 5	0 6	0 14	0 12	0 9	0 10	0 9	0 8	0 6	0 11	0 6	0 10	1 0	0 1	0 0	0 17	0 0	0 0	0 0	0 0	0 0	0 0	0 0	0 0	0 0	0 0	0 0	0 0	0 0
18	16209401	GTAGC	ATAAT	0 6	0 10	0 21	0 13	0 7	0 11	0 3	0 5	0 3	0 14	0 15	0 12	0 4	0 2	0 0	0 1	0 7	0 5	0 6	0 14	0 12	0 9	0 10	0 9	0 8	0 6	0 11	0 6	0 10	0 0	0 1	0 0	0 17	6 0	1 0	9 0	6 0	2 0	9 0	5 0	12 0	18 0	9 0	14 0	3 0	9 0
18	16209401	GTAGCG	ATAATA	0 6	0 10	0 21	0 13	0 7	0 11	0 3	0 5	0 3	0 14	0 15	0 12	0 4	0 2	0 0	0 1	0 7	0 5	0 6	0 14	0 12	0 9	0 10	0 9	0 8	0 6	0 11	0 6	0 10	0 0	0 1	0 0	0 17	0 0	0 0	0 0	0 0	0 0	7 0	3 0	0 0	0 0	0 0	0 0	5 0	0 0
18	16209401	GTAGCGC	ATAATGT	0 6	0 10	0 21	0 13	0 7	0 11	0 3	0 5	0 3	0 14	0 15	0 12	0 4	0 2	0 0	0 1	0 7	0 5	0 6	0 14	0 12	0 9	0 10	0 9	0 8	0 6	0 11	0 6	0 10	0 0	0 1	0 0	0 17	0 0	0 0	0 0	7 0	1 0	0 0	0 0	0 0	0 0	0 0	0 0	0 0	0 0
18	16209401	GTAGCG	ATAGCA	0 6	0 10	0 21	0 13	0 7	0 11	0 3	0 5	0 3	0 14	0 15	0 12	0 4	0 2	0 0	0 1	0 7	0 5	0 6	0 14	0 12	0 9	0 10	0 9	0 8	0 6	0 11	0 6	0 10	0 0	0 1	0 0	0 17	0 0	0 0	0 0	0 0	0 0	0 0	0 0	0 0	0 0	0 0	0 0	0 0	0 0
18	16209401	GTAGCGCGG	ATAGCACGA	0 6	0 10	0 21	0 13	0 7	0 11	0 3	0 5	0 3	0 14	0 15	0 12	0 4	0 2	0 0	0 1	0 7	0 5	0 6	0 14	0 12	0 9	0 10	0 9	0 8	0 6	0 11	0 6	0 10	0 0	0 1	0 0	0 17	0 0	0 0	0 0	0 0	0 0	0 0	0 0	0 0	0 0	0 0	0 0	0 0	0 0
18	16209401	GTAGCGC	ATAGCAT	0 6	0 10	0 21	0 13	0 7	0 11	0 3	0 5	0 3	0 14	0 15	0 12	0 4	0 2	0 0	0 1	0 7	0 5	0 6	0 14	0 12	0 9	0 10	0 9	0 8	0 6	0 11	0 6	0 10	0 0	0 1	0 0	0 17	0 0	0 0	0 0	0 0	0 0	0 0	0 0	0 0	0 0	0 0	0 0	0 0	0 0
18	16209401	GTAGCGCG	ATAGCATA	0 6	0 10	0 21	0 13	0 7	0 11	0 3	0 5	0 3	0 14	0 15	0 12	0 4	0 2	0 0	0 1	0 7	0 5	0 6	0 14	0 12	0 9	0 10	0 9	0 8	0 6	0 11	0 6	0 10	0 0	0 1	0 0	0 17	0 0	0 0	0 0	0 0	0 0	0 0	0 0	0 0	0 0	0 0	0 0	0 0	0 0
18	16209404	G	A	0 6	0 10	0 21	0 13	0 7	0 11	0 3	10 5	3 3	0 14	0 15	0 12	0 4	12 2	0 0	0 1	0 7	0 5	0 6	0 14	0 12	0 9	0 10	0 9	0 8	7 6	0 11	0 6	0 10	0 0	0 1	0 0	0 17	0 0	0 0	0 0	0 0	0 0	0 0	0 0	0 0	0 0	0 0	0 0	0 0	0 0
18	16209404	GCGCG	ACGCT	0 6	0 10	0 21	0 13	10 7	0 11	4 3	0 5	0 3	0 14	0 15	0 12	0 4	0 2	0 0	0 1	0 7	0 5	0 6	0 14	0 12	0 9	0 10	0 9	0 8	0 6	0 11	0 6	0 10	0 0	0 1	0 0	0 17	0 0	0 0	0 0	0 0	0 0	0 0	0 0	0 0	0 0	0 0	0 0	0 0	0 0
18	16209413	C	T	0 6	0 13	0 21	0 15	0 17	0 10	0 9	0 16	0 6	0 18	0 14	0 13	0 8	11 3	0 0	0 1	0 10	0 5	0 8	0 18	0 12	0 9	0 11	0 11	0 8	0 11	0 9	0 7	0 11	0 11	0 1	0 1	0 21	0 9	0 2	0 11	0 18	0 3	0 21	0 12	0 19	0 21	0 12	0 18	0 13	0 10
18	16209415	G	A	0 7	0 14	0 20	0 14	0 17	0 10	0 8	1 15	0 7	0 18	0 13	0 11	0 8	0 14	0 0	0 1	0 9	0 6	0 8	0 18	0 12	3 6	0 11	0 12	0 8	0 10	0 9	0 7	0 10	0 11	0 1	0 1	0 20	0 9	0 2	0 11	5 13	0 3	0 21	0 12	0 19	0 21	0 11	0 18	0 13	0 10
18	16209418	CACTA	TACTG	0 7	0 11	0 15	0 4	0 7	0 7	0 5	0 4	0 3	0 16	0 11	0 12	0 7	0 3	0 0	0 2	0 6	0 6	0 7	0 17	0 11	0 6	0 13	0 11	0 7	0 6	0 6	0 6	0 0	0 0	0 0	0 0	0 14	0 0	0 0	0 0	0 0	0 0	0 0	0 0	0 0	0 0	0 0	0 0	0 0	0 0
18	16209420	CTA	TTG	0 7	0 11	0 15	0 4	0 7	0 7	0 5	10 4	3 3	0 16	0 11	0 12	0 7	0 3	0 0	0 2	0 6	0 6	0 7	0 17	0 11	2 6	0 13	0 11	0 7	4 6	0 6	0 6	0 0	0 0	0 0	0 0	0 14	0 0	0 0	0 0	0 0	0 0	0 0	0 0	0 0	0 0	0 0	0 0	0 0	0 0
18	16209422	A	G	0 7	0 11	0 15	0 4	8 7	0 7	3 5	0 4	0 3	1 16	0 11	0 12	0 7	3 3	0 0	0 2	0 6	0 6	0 7	0 17	0 11	0 6	0 13	0 11	0 7	0 6	0 6	0 6	0 0	6 0	0 0	1 0	5 14	9 0	2 0	10 0	13 0	3 0	21 0	11 0	18 0	21 0	12 0	17 0	13 0	10 0
18	16209422	ATG	GTA	0 7	0 11	0 15	0 4	0 7	0 7	0 5	0 4	0 3	0 16	0 11	0 12	0 7	0 3	0 0	0 2	0 6	0 6	0 7	0 17	0 11	0 6	0 13	0 11	0 7	0 6	0 6	0 6	10 0	0 0	0 0	0 0	0 14	0 0	0 0	2 0	5 0	0 0	0 0	1 0	0 0	0 0	0 0	0 0	0 0	0 0
18	16209430	TTGCACTGTTGAC	T	0 5	0 8	0 8	1 5	0 8	0 6	0 4	0 4	0 4	0 15	0 10	0 9	0 8	0 3	0 0	0 2	0 5	0 6	2 5	9 3	0 9	0 6	0 9	0 7	0 6	0 7	0 1	0 6	0 0	1 0	0 0	1 0	2 5	5 0	1 0	7 0	8 0	3 0	10 0	6 0	13 0	12 0	5 0	13 0	8 0	7 0
18	16209437	G	A	0 5	0 8	0 8	0 5	7 8	0 6	2 4	6 4	2 4	0 15	0 10	0 9	0 8	9 3	0 0	0 2	0 5	0 6	0 5	0 3	0 9	0 6	0 9	0 7	0 6	4 7	0 1	0 6	0 0	0 0	0 0	0 0	0 5	0 0	0 0	0 0	0 0	0 0	0 0	0 0	0 0	0 0	0 0	0 0	0 0	0 0
18	16209440	G	A	0 5	0 8	0 8	0 5	0 8	0 6	0 4	0 4	0 4	0 15	0 10	0 9	0 8	0 3	0 0	0 2	0 5	0 6	0 5	0 3	0 9	0 6	0 9	0 7	0 6	0 7	0 1	0 6	10 0	0 0	0 0	0 0	0 5	0 0	0 0	0 0	0 0	0 0	0 0	0 0	0 0	0 0	0 0	0 0	0 0	0 0
18	16209447	C	T	0 5	0 9	0 7	0 7	7 8	0 7	0 8	0 12	0 7	0 14	0 9	0 10	0 12	0 13	0 0	0 4	0 5	0 6	0 8	0 13	0 9	0 7	0 10	0 8	0 8	0 12	0 1	0 5	0 12	0 4	0 0	0 3	0 10	0 8	0 7	0 15	0 19	0 5	0 17	0 14	0 20	0 17	0 7	0 18	0 12	0 10
18	16209453	A	G	0 4	0 5	0 5	0 8	5 6	0 3	3 5	0 3	0 5	0 10	0 8	0 8	0 11	10 3	0 0	0 5	0 4	0 6	3 4	9 3	0 7	2 3	0 9	0 8	0 9	0 6	0 1	0 4	0 0	0 0	0 0	0 0	3 2	8 0	8 0	15 0	19 0	5 0	18 0	14 0	21 0	18 0	8 0	18 0	12 0	10 0
18	16209453	ATGGGGGC	GGGGGT	0 4	0 5	0 5	0 8	0 6	0 3	0 5	0 3	0 5	0 10	0 8	0 8	0 11	0 3	0 0	0 5	0 4	0 6	0 4	0 3	0 7	0 3	0 9	0 8	0 9	0 6	0 1	0 4	5 0	0 0	0 0	0 0	0 2	0 0	0 0	0 0	0 0	0 0	0 0	0 0	0 0	0 0	0 0	0 0	0 0	0 0
18	16209453	ATGGGGGCAT	GGGGGTAA	0 4	0 5	0 5	0 8	0 6	0 3	0 5	0 3	0 5	0 10	0 8	0 8	0 11	0 3	0 0	0 5	0 4	0 6	0 4	0 3	0 7	0 3	0 9	0 8	0 9	0 6	0 1	0 4	0 0	0 0	0 0	0 0	0 2	0 0	0 0	0 0	0 0	0 0	0 0	0 0	0 0	0 0	0 0	0 0	0 0	0 0
18	16209453	ATGGG	GTGGA	0 4	0 5	0 5	0 8	0 6	0 3	0 5	4 3	2 5	0 10	0 8	0 8	0 11	0 3	0 0	0 5	0 4	0 6	0 4	0 3	0 7	0 3	0 9	0 8	0 9	4 6	0 1	0 4	0 0	0 0	0 0	0 0	0 2	0 0	0 0	0 0	0 0	0 0	0 0	0 0	0 0	0 0	0 0	0 0	0 0	0 0
18	16209453	ATGGGGGC	GTTGGAGT	0 4	0 5	0 5	0 8	0 6	0 3	0 5	0 3	0 5	0 10	0 8	0 8	0 11	0 3	0 0	0 5	0 4	0 6	0 4	0 3	0 7	0 3	0 9	0 8	0 9	0 6	0 1	0 4	2 0	2 0	0 0	2 0	0 2	0 0	0 0	0 0	0 0	0 0	0 0	0 0	0 0	0 0	0 0	0 0	0 0	0 0
18	16209455	G	T	0 4	1 5	0 5	0 8	0 6	0 3	0 5	0 3	0 5	0 10	0 8	0 8	0 11	0 3	0 0	0 5	0 4	0 6	0 4	0 3	0 7	0 3	0 9	0 8	0 9	0 6	0 1	0 4	0 0	0 0	0 0	0 0	0 2	0 0	0 0	0 0	0 0	0 0	0 0	0 0	0 0	0 0	0 0	0 0	0 0	0 0
18	16209465	A	G	0 4	0 6	0 5	0 9	0 9	0 3	0 8	0 8	0 7	0 13	0 7	0 10	0 13	0 14	0 1	0 6	0 4	0 6	0 6	0 13	0 7	0 5	0 8	0 7	0 8	0 14	0 1	0 4	0 10	0 6	0 0	0 3	0 5	0 11	0 8	0 18	5 15	0 5	0 19	3 11	0 24	0 19	0 13	0 22	0 14	0 14
18	16209466	G	T	0 4	0 6	0 5	0 9	0 9	0 3	0 9	0 8	0 7	0 13	0 6	0 10	0 13	0 14	0 1	0 7	0 4	0 6	0 6	0 13	0 7	0 6	0 8	0 8	0 8	0 14	0 1	0 4	0 10	0 6	0 0	0 3	0 5	0 11	0 8	0 18	0 20	0 5	0 19	0 14	0 23	0 19	0 13	0 22	0 14	0 14
18	16209467	G	A	0 4	0 6	0 4	0 9	0 8	0 3	0 10	5 3	2 5	0 13	0 7	0 10	0 13	0 14	0 1	0 7	0 4	0 6	0 6	0 13	0 6	0 6	0 8	0 8	0 8	6 8	0 1	0 4	0 10	0 6	0 0	0 3	3 2	11 0	8 0	15 2	15 5	5 0	18 0	11 3	24 0	19 0	13 0	22 0	14 0	14 0
18	16209472	CTGT	TTGC	0 0	0 0	0 0	0 0	0 0	0 0	0 0	0 0	0 0	0 0	0 0	0 0	0 0	0 0	0 0	0 0	0 0	0 0	0 0	0 0	0 0	0 0	0 0	0 0	0 0	0 0	0 0	0 0	0 0	0 0	0 0	0 0	0 0	0 0	0 0	0 0	0 0	0 0	0 0	0 0	0 0	0 0	0 0	0 0	0 0	0 0
18	16209472	CTGTAGCT	TTGCAGCC	0 0	0 0	0 0	0 0	0 0	0 0	0 0	0 0	0 0	0 0	0 0	0 0	0 0	0 0	0 0	0 0	0 0	0 0	0 0	0 0	0 0	0 0	0 0	0 0	0 0	0 0	0 0	0 0	0 0	0 0	0 0	0 0	0 0	0 0	0 0	0 0	0 0	0 0	0 0	0 0	0 0	0 0	0 0	0 0	0 0	0 0
18	16209474	GTAGCTTG	ACAGCCTA	0 0	0 0	0 0	0 0	0 0	0 0	0 0	0 0	0 0	0 0	0 0	0 0	0 0	0 0	0 0	0 0	0 0	0 0	0 0	0 0	0 0	0 0	0 0	0 0	0 0	0 0	0 0	0 0	3 0	0 0	0 0	0 0	0 0	0 0	0 0	0 0	0 0	0 0	0 0	0 0	0 0	0 0	0 0	0 0	0 0	0 0
18	16209475	TAGCT	CAGCC	0 0	0 0	0 0	0 0	0 0	0 0	0 0	0 0	0 0	0 0	0 0	0 0	0 0	0 0	0 0	0 0	0 0	0 0	0 0	0 0	0 0	0 0	0 0	0 0	0 0	0 0	0 0	0 0	0 0	4 0	0 0	1 0	3 0	12 0	8 0	17 0	15 0	6 0	19 0	11 0	25 0	19 0	14 0	22 0	14 0	15 0
18	16209478	CT	TC	0 0	0 0	0 0	0 0	0 0	0 0	0 0	0 0	0 0	0 0	0 0	0 0	0 0	0 0	0 0	0 0	0 0	0 0	3 0	8 0	0 0	0 0	0 0	0 0	0 0	0 0	0 0	0 0	0 0	0 0	0 0	0 0	0 0	0 0	0 0	0 0	0 0	0 0	0 0	0 0	0 0	0 0	0 0	0 0	0 0	0 0
18	16209479	T	C	4 0	5 0	1 0	8 0	6 0	5 0	7 0	7 0	7 0	11 0	6 0	8 0	13 0	14 0	1 0	6 0	4 0	5 0	1 0	4 0	4 0	5 0	4 0	5 0	6 0	13 0	0 0	3 0	6 0	2 0	0 0	2 0	3 0	0 0	0 0	0 0	0 0	0 0	0 0	0 0	0 0	0 0	0 0	0 0	0 0	0 0
18	16209483	AG	A	0 4	0 6	0 1	0 7	0 5	0 4	0 11	0 7	0 5	0 12	0 8	0 9	0 14	0 15	0 1	0 8	0 4	0 3	0 4	0 12	0 3	0 4	0 5	0 5	0 6	0 14	0 0	0 3	0 10	0 8	0 0	0 3	0 7	0 13	0 8	0 20	0 21	0 7	0 20	0 16	0 26	0 19	0 16	0 26	0 15	0 17
18	16209489	C	T	0 3	0 6	0 1	0 8	0 5	0 5	0 11	0 7	0 4	0 12	0 9	0 9	0 15	0 14	0 1	0 7	1 3	3 0	0 5	3 7	0 3	0 4	0 6	0 5	0 6	8 5	0 0	2 1	0 4	0 6	0 0	0 1	0 7	0 15	0 9	0 21	0 22	0 8	0 20	0 16	0 33	0 25	0 15	0 27	0 16	0 19
18	16209489	CAAG	TAAT	0 3	0 6	0 1	0 8	0 5	0 5	0 11	0 7	0 4	0 12	0 9	0 9	0 15	0 14	0 1	0 7	0 3	0 0	0 5	0 7	0 3	0 4	0 6	0 5	0 6	0 5	0 0	0 1	5 4	2 6	0 0	2 1	0 7	0 15	0 9	0 21	0 22	0 8	0 20	0 16	0 33	0 25	0 15	0 27	0 16	0 19
18	16209493	C	T	0 3	0 6	0 1	0 8	0 5	0 6	0 12	0 7	0 4	0 13	0 9	0 9	0 15	0 14	0 1	0 7	0 4	0 3	0 6	0 10	0 3	0 4	0 7	0 5	0 6	0 13	0 0	0 3	0 9	0 9	0 0	0 3	0 7	0 15	0 9	0 20	7 14	3 5	0 20	0 19	0 32	0 25	0 16	0 27	0 16	0 19
18	16209494	G	A	0 3	0 6	0 1	0 8	0 4	0 6	0 12	0 7	0 4	0 13	0 8	0 9	0 15	0 13	0 1	0 7	0 4	0 3	0 6	0 10	0 3	0 4	0 7	0 5	0 6	0 13	0 0	0 2	0 9	0 9	0 0	0 3	0 7	0 15	0 9	2 19	0 21	0 8	0 20	2 16	0 33	0 25	0 16	0 27	0 16	0 19
18	16209502	G	A	0 2	0 6	0 1	0 9	0 5	0 5	0 12	0 10	0 3	0 13	0 7	0 7	0 14	0 13	0 1	0 7	0 2	0 3	0 6	0 7	0 3	0 2	0 7	0 4	0 7	0 13	0 0	0 1	3 0	0 6	0 0	0 1	0 6	0 15	0 10	2 19	1 17	0 8	0 19	2 16	0 32	0 22	0 15	0 24	0 15	0 18
18	16209502	GG	AA	0 2	0 6	0 1	0 9	0 5	0 5	0 12	0 10	0 3	0 13	0 7	0 7	0 14	0 13	0 1	0 7	0 2	0 3	0 6	0 7	0 3	0 2	0 7	0 4	0 7	0 13	0 0	0 1	0 0	0 6	0 0	0 1	0 6	0 15	0 10	0 19	0 17	0 8	0 19	0 16	0 32	0 22	0 15	0 24	0 15	0 18
18	16209503	G	A	0 2	0 6	0 1	0 9	0 5	0 5	0 12	0 10	0 3	0 13	0 7	0 7	0 14	0 13	0 1	0 7	0 2	0 3	0 6	0 7	0 3	0 2	0 7	0 4	0 7	0 13	0 0	0 1	4 0	0 6	0 0	2 1	0 6	0 15	0 10	0 19	0 17	0 8	0 19	0 16	0 32	0 22	0 15	0 24	0 15	0 18
18	16209507	C	T	0 2	0 5	0 1	0 7	0 4	0 5	0 11	0 9	0 3	0 12	0 8	0 7	0 14	0 11	0 1	0 7	0 3	0 3	0 6	0 7	0 1	0 2	0 6	0 4	0 5	0 13	0 0	0 1	0 7	0 6	0 0	0 3	0 4	0 15	0 9	0 21	0 17	0 8	0 19	0 19	0 32	0 22	0 14	0 24	0 15	0 17
18	16209509	CGCCTCCTGGGATTGCG	TGCCCCTTGGGGCTGCA	0 0	0 2	0 0	0 4	0 0	0 4	0 3	0 2	0 1	0 6	0 6	0 4	0 12	0 0	0 1	0 6	0 1	0 0	0 1	0 2	0 0	0 1	0 5	0 2	0 6	0 6	0 0	0 1	0 0	0 0	0 0	0 0	0 3	10 0	3 0	0 0	0 0	3 0	2 0	6 0	20 0	10 0	9 0	14 0	5 0	8 0
18	16209534	G	A	0 0	0 2	0 1	2 4	0 1	0 4	0 8	0 5	0 1	2 8	0 6	0 4	0 12	9 1	0 1	0 6	0 1	0 0	0 5	0 4	0 0	0 2	0 9	0 5	0 6	0 12	0 0	0 1	0 10	0 7	0 0	0 2	1 3	11 1	7 0	7 1	12 0	8 0	5 0	13 3	26 4	12 3	12 0	17 0	15 0	16 0
18	16209535	C	T	0 0	0 2	0 1	0 6	0 1	0 4	0 8	0 5	0 1	0 10	0 5	0 4	0 12	0 9	0 1	0 6	0 1	0 0	0 5	0 5	0 0	0 2	0 9	0 6	0 5	0 12	0 1	0 1	4 5	2 5	0 0	1 1	0 4	0 12	1 6	0 7	0 12	0 8	0 6	0 16	0 31	0 16	0 13	0 18	0 15	0 16
18	16209536	G	A	0 0	0 2	0 1	0 6	0 1	0 4	0 8	0 5	0 1	0 10	0 5	0 4	0 12	0 10	0 1	0 6	0 1	0 0	0 5	0 5	0 0	0 2	0 9	0 6	0 5	0 13	0 1	0 1	0 9	0 7	0 0	0 2	0 4	0 12	0 7	3 5	0 12	0 8	0 6	0 16	0 32	0 16	0 13	0 18	0 15	0 16
18	16209537	C	T	0 0	0 2	0 1	0 6	0 1	0 4	0 8	0 5	0 1	0 10	0 5	0 4	0 11	0 11	0 1	0 6	0 1	0 0	0 5	0 5	0 0	0 1	0 9	0 6	0 5	0 13	0 1	0 1	0 9	5 2	0 0	1 1	0 4	0 12	1 6	0 8	0 12	0 8	0 5	0 16	0 32	0 16	0 12	0 18	0 15	0 16
18	16209540	GGGCTGCCTACCTGGGGCT	AGGCTGCCTGCTTGGAGCG	0 0	0 1	0 1	0 2	0 1	0 4	0 8	0 3	0 0	0 6	0 5	0 1	0 6	0 9	0 0	0 5	0 1	0 0	0 4	0 3	0 0	0 0	0 3	0 6	0 3	0 7	0 1	0 0	0 0	0 0	0 0	0 0	0 2	11 0	3 0	0 0	8 0	8 0	3 0	9 0	24 0	12 0	13 0	17 0	13 0	16 0
18	16209540	GGGCTGCCTACCTGGGGCT	AGGCTGTCTGCTTGGAGCG	0 0	0 1	0 1	0 2	0 1	0 4	0 8	0 3	0 0	0 6	0 5	0 1	0 6	0 9	0 0	0 5	0 1	0 0	0 4	0 3	0 0	0 0	0 3	0 6	0 3	0 7	0 1	0 0	0 0	0 0	0 0	0 0	0 2	0 0	3 0	0 0	0 0	0 0	3 0	4 0	0 0	0 0	0 0	0 0	0 0	0 0
18	16209540	GGGCTGCCTACCTGGGGCTGAG	AGGCTGTCTGCTTGGAGCGGAA	0 0	0 1	0 1	0 2	0 1	0 4	0 8	0 3	0 0	0 6	0 5	0 1	0 6	0 9	0 0	0 5	0 1	0 0	0 4	0 3	0 0	0 0	0 3	0 6	0 3	0 7	0 1	0 0	0 0	0 0	0 0	0 0	0 2	0 0	0 0	7 0	4 0	0 0	0 0	0 0	0 0	0 0	0 0	0 0	0 0	0 0
18	16209541	GGCTGCCTACCTGGGGCTGAG	AGCTGCCTGCCTGAGGCTGAA	0 0	0 1	0 1	0 2	0 1	0 4	0 8	0 3	0 0	0 6	0 5	0 1	0 6	0 9	0 0	0 5	0 1	0 0	0 4	0 3	0 0	0 0	0 3	0 6	0 3	0 7	0 1	0 0	4 0	0 0	0 0	0 0	0 2	0 0	0 0	0 0	0 0	0 0	0 0	0 0	0 0	0 0	0 0	0 0	0 0	0 0
18	16209545	GCCTACCTGGGGCTGA	ACCTGCTTGGGGTTGG	0 0	0 1	0 1	0 2	0 1	0 4	0 8	0 3	0 0	0 6	0 5	0 1	0 6	0 9	0 0	0 5	0 1	0 0	0 4	0 3	0 0	0 0	0 3	0 6	0 3	0 7	0 1	0 0	1 0	2 0	0 0	1 0	0 2	0 0	0 0	0 0	0 0	0 0	0 0	0 0	0 0	0 0	0 0	0 0	0 0	0 0
18	16209549	ACCTGGGGCTGAGC	GATTGGGGTGGAGT	0 0	0 1	0 1	0 2	0 1	0 4	0 8	0 3	0 0	0 6	0 5	0 1	0 6	0 9	0 0	0 5	0 1	0 0	0 4	0 3	0 0	0 0	0 3	0 6	0 3	0 7	0 1	0 0	0 0	0 0	0 0	0 0	0 2	0 0	0 0	0 0	0 0	0 0	0 0	0 0	0 0	0 0	0 0	0 0	0 0	0 0
18	16209549	ACCTGGGG	GCCTGGGA	0 0	0 1	0 1	0 2	0 1	0 4	0 8	0 3	0 0	0 6	0 5	0 1	0 6	0 9	0 0	0 5	0 1	0 0	0 4	0 3	0 0	0 0	0 3	0 6	0 3	0 7	0 1	0 0	0 0	0 0	0 0	0 0	0 2	0 0	0 0	0 0	0 0	0 0	0 0	0 0	0 0	0 0	0 0	0 0	0 0	0 0
18	16209549	ACCTGGGGCT	GCTTGGGGCG	0 0	0 1	0 1	0 2	0 1	0 4	0 8	0 3	0 0	0 6	0 5	0 1	0 6	0 9	0 0	0 5	0 1	0 0	0 4	0 3	0 0	0 0	0 3	0 6	0 3	0 7	0 1	0 0	0 0	0 0	0 0	0 0	0 2	0 0	0 0	0 0	0 0	0 0	0 0	0 0	0 0	0 0	0 0	0 0	0 0	0 0
18	16209549	ACCTGGGGCTGAG	GCTTGGGGCGGAA	0 0	0 1	0 1	0 2	0 1	0 4	0 8	0 3	0 0	0 6	0 5	0 1	0 6	0 9	0 0	0 5	0 1	0 0	0 4	0 3	0 0	0 0	0 3	0 6	0 3	0 7	0 1	0 0	0 0	0 0	0 0	0 0	0 2	0 0	0 0	0 0	0 0	0 0	0 0	0 0	0 0	0 0	0 0	0 0	0 0	0 0
18	16209549	ACCTGGGGCTGAGC	GCTTGGGGCGGAGT	0 0	0 1	0 1	0 2	0 1	0 4	0 8	0 3	0 0	0 6	0 5	0 1	0 6	0 9	0 0	0 5	0 1	0 0	0 4	0 3	0 0	0 0	0 3	0 6	0 3	0 7	0 1	0 0	0 0	3 0	0 0	1 0	0 2	0 0	0 0	0 0	0 0	0 0	0 0	0 0	0 0	0 0	0 0	0 0	0 0	0 0
18	16209556	G	A	0 0	0 1	0 1	0 2	0 1	0 4	0 8	0 3	0 0	0 6	0 5	0 1	0 6	0 9	0 0	0 5	0 1	0 0	0 4	0 3	0 0	0 0	5 3	0 6	0 3	0 7	0 1	0 0	0 0	0 0	0 0	0 0	0 2	0 0	0 0	0 0	0 0	0 0	0 0	0 0	0 0	0 0	0 0	0 0	0 0	0 0
18	16209570	GCAT	ACGC	0 0	0 1	0 1	0 2	0 2	0 4	0 4	0 2	0 0	0 8	0 4	0 1	0 5	0 2	0 0	0 2	0 2	0 1	0 8	0 0	0 1	0 0	0 10	0 8	0 4	0 4	0 1	0 1	6 0	0 0	0 0	0 0	0 1	0 0	0 0	0 0	0 0	0 0	0 0	0 0	0 0	0 0	0 0	0 0	4 0	0 0
18	16209572	A	G	0 0	0 1	0 1	0 2	0 2	0 4	0 4	0 2	0 0	0 8	0 4	0 1	0 5	0 2	0 0	0 2	0 2	0 1	0 8	0 0	0 1	0 0	0 10	0 8	0 4	0 4	0 1	0 1	0 0	3 0	0 0	1 0	0 1	0 0	0 0	0 0	0 0	0 0	0 0	0 0	0 0	0 0	0 0	0 0	0 0	0 0
18	16209572	AT	GC	0 0	0 1	0 1	0 2	0 2	0 4	0 4	0 2	0 0	0 8	0 4	0 1	0 5	0 2	0 0	0 2	0 2	0 1	0 8	0 0	0 1	0 0	0 10	0 8	0 4	0 4	0 1	0 1	3 0	4 0	0 0	0 0	1 1	14 0	9 0	13 0	14 0	8 0	12 0	18 0	26 0	11 0	15 0	19 0	5 0	20 0
18	16209572	AT	TC	0 0	0 1	0 1	0 2	0 2	0 4	0 4	0 2	0 0	0 8	0 4	0 1	0 5	0 2	0 0	0 2	0 2	0 1	0 8	0 0	0 1	0 0	0 10	0 8	0 4	0 4	0 1	0 1	0 0	0 0	0 0	0 0	0 1	0 0	0 0	0 0	0 0	0 0	0 0	0 0	0 0	0 0	0 0	0 0	0 0	0 0
18	16209573	T	C	0 0	0 1	0 1	0 2	2 2	0 4	3 4	3 2	0 0	0 8	0 4	0 1	0 5	8 2	0 0	0 2	0 2	0 1	2 8	1 0	0 1	0 0	0 10	0 8	0 4	6 4	0 1	0 1	0 0	0 0	1 0	0 0	0 1	0 0	0 0	0 0	0 0	0 0	0 0	0 0	0 0	0 0	0 0	0 0	0 0	0 0
18	16209579	G	A	0 0	0 0	0 1	0 2	0 4	0 4	0 4	0 5	0 0	0 10	0 2	0 0	0 5	0 10	0 0	0 1	0 2	0 1	0 11	0 1	0 1	0 0	0 9	0 8	0 4	0 10	0 1	0 1	0 7	0 0	0 1	0 0	0 5	0 15	0 10	0 13	0 14	0 8	0 12	0 19	0 25	0 12	0 14	0 18	0 9	0 20
18	16209579	GGT	AGC	0 0	0 0	0 1	0 2	0 4	0 4	0 4	0 5	0 0	0 10	0 2	0 0	0 5	0 10	0 0	0 1	0 2	0 1	0 11	0 1	0 1	0 0	0 9	0 8	0 4	0 10	0 1	0 1	4 7	4 0	0 1	0 0	0 5	0 15	1 10	0 13	0 14	0 8	0 12	0 19	0 25	0 12	0 14	0 18	0 9	0 20
18	16209580	G	A	0 0	0 0	0 1	0 2	0 4	0 4	0 4	0 5	0 0	0 10	0 2	0 0	0 5	0 10	0 0	0 1	0 2	0 1	0 11	0 1	0 1	0 0	0 9	0 8	0 4	0 10	0 1	0 1	0 7	4 0	0 1	1 0	0 5	0 15	0 10	0 13	0 14	0 8	0 12	0 19	0 25	0 12	0 14	0 18	0 9	0 20
18	16209582	G	A	0 0	0 0	0 1	0 2	0 4	0 4	0 4	0 5	0 0	0 10	0 2	0 0	0 5	0 10	0 0	0 1	0 2	0 1	0 11	0 1	0 1	0 0	0 9	0 8	0 4	0 10	0 1	0 1	0 11	0 7	0 1	0 2	0 5	0 14	7 4	0 13	0 14	0 8	7 7	8 10	0 25	0 12	0 14	0 18	0 9	0 21
18	16209587	G	A	0 2	0 0	0 1	0 1	0 3	0 5	0 5	0 5	0 0	0 10	0 2	0 0	0 5	0 10	0 0	0 2	0 2	0 1	0 13	0 1	0 1	0 2	0 9	0 8	0 4	0 10	0 1	0 1	0 11	0 8	0 1	0 2	5 0	14 0	10 1	13 0	14 0	8 0	14 0	17 1	24 0	12 0	14 0	18 0	9 0	20 0
18	16209589	C	T	0 2	0 0	0 1	0 1	0 4	0 5	0 5	0 5	0 0	0 9	0 2	0 0	0 5	0 11	0 0	0 2	0 2	0 1	0 12	0 1	0 1	0 2	0 8	0 8	0 4	0 10	0 1	0 1	0 11	0 8	0 1	0 2	0 5	0 14	0 11	0 13	0 14	0 8	0 14	0 17	0 24	0 12	0 14	0 18	0 8	0 20
18	16209591	G	A	0 2	0 1	0 1	0 1	0 4	0 5	0 5	0 4	0 0	0 9	0 2	0 0	0 6	0 11	0 0	0 2	0 2	0 1	0 12	0 1	0 1	0 1	0 7	0 8	0 4	0 10	0 1	0 1	0 4	3 5	0 1	1 0	0 5	0 12	0 9	0 12	0 12	0 8	0 13	0 16	0 22	1 9	0 13	0 17	0 8	0 17
18	16209591	GCTTC	ACTTT	0 2	0 1	0 1	0 1	0 4	0 5	0 5	0 4	0 0	0 9	0 2	0 0	0 6	0 11	0 0	0 2	0 2	0 1	0 12	0 1	0 1	0 1	0 7	0 8	0 4	0 10	0 1	0 1	7 4	0 5	0 1	0 0	0 5	0 12	0 9	0 12	0 12	0 8	0 13	0 16	0 22	0 9	0 13	0 17	0 8	0 17
18	16209592	C	T	0 2	0 1	0 1	0 1	0 4	0 5	0 5	0 4	0 0	0 9	0 2	0 0	0 6	0 11	0 0	0 2	0 2	0 1	0 12	0 1	0 1	1 1	0 7	0 8	0 4	0 10	0 1	0 1	0 4	0 5	0 1	0 0	0 5	0 12	0 9	0 12	0 12	0 8	0 13	0 16	0 22	0 9	0 13	0 17	0 8	3 17
18	16209603	G	A	0 2	0 2	0 1	0 1	0 4	0 7	0 5	0 3	0 0	0 11	0 3	0 1	0 6	0 10	0 0	0 2	0 3	0 1	0 13	0 2	0 1	0 2	0 6	0 9	0 3	0 11	0 1	0 1	0 16	0 9	0 1	0 1	5 3	11 0	6 1	11 0	10 0	6 0	12 0	16 0	20 0	11 0	13 0	15 0	9 0	20 0
18	16209606	G	C	0 2	0 2	0 1	0 1	0 4	0 7	0 5	0 4	0 0	0 11	0 2	0 1	0 4	0 7	0 0	0 2	0 2	0 1	0 12	0 2	0 1	0 2	0 6	0 8	0 2	0 10	0 1	0 1	7 7	5 3	0 1	0 0	0 8	0 9	0 6	0 11	0 10	0 6	0 12	0 16	0 20	0 10	0 11	0 14	0 9	0 17
18	16209614	GCAC	G	0 3	0 2	0 2	0 0	0 5	0 7	0 4	0 4	0 0	0 10	0 5	0 1	0 4	0 6	0 0	0 1	0 2	0 1	0 11	0 1	0 1	0 2	0 1	0 6	0 2	0 7	0 1	0 1	0 4	1 0	0 1	0 0	0 4	0 0	0 0	0 0	0 0	0 0	0 0	0 0	0 0	0 0	0 0	0 0	0 0	0 0
18	16209618	CACGTGG	GTGA	0 3	0 2	0 2	0 0	0 5	0 7	0 4	0 4	0 0	0 10	0 5	0 1	0 4	0 6	0 0	0 1	0 2	0 1	0 11	0 1	0 1	0 2	0 1	0 6	0 2	0 7	0 1	0 1	0 4	0 0	0 1	0 0	0 4	0 0	0 0	0 0	0 0	0 0	0 0	0 0	0 0	0 0	0 0	0 0	0 0	0 0
18	16209621	GTGGA	ATGGC	0 3	0 2	0 2	0 0	0 5	0 7	0 4	0 4	0 0	0 10	0 5	0 1	0 4	0 6	0 0	0 1	0 2	0 1	0 11	0 1	0 1	0 2	0 1	0 6	0 2	0 7	0 1	0 1	0 4	0 0	0 1	0 0	0 4	0 0	0 0	0 0	0 0	0 0	0 0	0 0	0 0	0 0	0 0	0 0	4 0	0 0
18	16209622	T	A	0 3	0 2	0 2	0 0	0 5	0 7	0 4	0 4	0 0	0 10	0 5	0 1	0 4	0 6	0 0	0 1	0 2	0 1	0 11	0 1	0 1	0 2	0 1	0 6	0 2	0 7	0 1	0 1	0 4	0 0	0 1	0 0	5 4	0 0	0 0	0 0	0 0	0 0	0 0	0 0	0 0	0 0	0 0	0 0	0 0	0 0
18	16209625	A	C	0 3	0 2	0 2	0 0	0 5	0 7	0 4	0 4	0 0	0 10	0 5	0 1	0 4	0 6	0 0	0 1	0 2	0 1	0 11	0 1	0 1	0 2	0 1	0 6	0 2	0 7	0 1	0 1	6 4	5 0	0 1	1 0	0 4	8 0	6 0	8 0	8 0	5 0	10 0	15 0	16 0	10 0	9 0	11 0	3 0	15 0
18	16209632	GCAT	ACAA	0 3	0 7	0 6	0 1	0 9	0 8	0 6	0 4	0 4	0 15	0 10	0 2	0 6	0 8	0 0	0 2	0 6	0 3	0 10	0 2	0 5	0 4	0 4	0 7	0 7	0 8	0 3	0 1	0 12	0 5	0 0	0 1	0 7	7 0	6 0	6 0	6 0	3 0	10 0	14 0	13 0	7 0	7 0	9 0	7 0	10 0
18	16209633	C	T	0 3	0 7	0 6	0 1	0 9	0 8	0 6	0 4	0 4	0 15	0 10	0 2	0 6	0 8	0 0	0 2	0 6	0 3	0 10	0 2	0 5	0 4	0 4	0 7	0 7	0 8	0 3	0 1	0 12	1 5	0 0	0 1	4 7	0 0	0 0	0 0	0 0	0 0	0 0	0 0	0 0	0 0	0 0	0 0	0 0	0 0
18	16209643	C	T	0 5	0 9	0 14	0 5	0 9	0 15	0 8	0 5	0 5	0 20	0 12	0 3	0 6	0 7	0 0	0 3	0 11	0 5	0 11	0 7	0 9	0 6	0 7	0 10	0 11	0 9	0 5	0 5	0 5	0 5	0 0	0 1	0 15	0 6	0 5	0 6	0 5	0 3	0 10	0 11	0 13	0 7	0 7	0 9	0 6	0 11
18	16209645	AAGCC	TAGCT	0 5	0 12	0 15	0 6	0 8	0 17	0 10	0 5	0 5	0 13	0 9	0 4	0 3	0 5	0 1	0 1	0 11	0 4	0 8	0 7	0 6	0 6	0 6	0 9	0 10	0 9	0 7	0 6	0 12	0 5	0 0	0 1	0 11	0 0	4 0	5 0	1 0	0 0	4 0	5 0	0 0	0 0	0 0	0 0	0 0	0 0
18	16209647	G	A	0 5	0 12	0 15	0 6	0 8	0 17	0 10	0 5	0 5	7 13	5 9	1 4	3 3	1 5	0 1	2 1	0 11	0 4	0 8	0 7	4 6	0 6	0 6	0 9	0 10	0 9	0 7	0 6	0 12	0 5	0 0	0 1	0 11	0 0	0 0	0 0	0 0	0 0	0 0	0 0	0 0	0 0	0 0	0 0	0 0	0 0
18	16209649	C	T	0 5	0 12	0 15	0 6	0 8	0 17	0 10	0 5	0 5	0 13	0 9	0 4	0 3	0 5	0 1	0 1	0 11	0 4	0 8	0 7	0 6	0 6	0 6	0 9	0 10	0 9	0 7	0 6	0 12	0 5	0 0	0 1	4 11	5 0	1 0	0 0	4 0	3 0	7 0	4 0	13 0	7 0	7 0	9 0	5 0	10 0
18	16209650	A	C	0 6	2 11	1 15	1 6	0 9	2 15	1 10	0 6	0 6	0 21	0 15	1 5	0 8	0 6	0 1	0 3	0 11	0 4	0 9	0 7	1 9	0 6	0 6	0 9	0 11	0 9	0 8	0 6	5 8	4 0	0 0	1 0	0 15	0 5	0 4	0 5	0 5	0 3	0 11	0 7	0 12	0 7	0 6	0 9	0 6	0 10
18	16209651	G	A	0 6	0 13	0 16	0 7	0 9	0 17	0 11	0 6	0 6	0 21	0 15	0 5	0 8	0 6	0 1	0 4	0 11	0 4	0 9	0 7	0 9	0 6	0 6	0 8	0 11	0 9	0 8	0 6	0 13	0 4	0 0	0 1	0 14	0 4	0 5	0 8	0 5	0 4	0 12	0 9	0 14	0 7	0 6	0 9	0 6	0 11
18	16209655	CACAAC	TATAAT	0 6	0 14	0 17	0 7	0 7	0 17	0 8	0 3	0 5	0 20	0 14	0 7	0 6	0 1	0 1	0 4	0 11	0 4	0 6	0 7	0 9	0 5	0 7	0 7	0 11	0 4	0 8	0 4	0 8	0 0	0 0	0 0	0 11	0 0	0 0	0 3	0 0	0 1	0 1	0 0	0 2	0 0	0 0	0 1	0 0	0 0
18	16209655	CACAA	TATAG	0 6	0 14	0 17	0 7	0 7	0 17	0 8	0 3	0 5	0 20	0 14	0 7	0 6	0 1	0 1	0 4	0 11	0 4	0 6	0 7	0 9	0 5	0 7	0 7	0 11	0 4	0 8	0 4	0 8	0 0	0 0	0 0	3 11	4 0	5 0	5 3	3 0	3 1	11 1	7 0	10 2	5 0	5 0	7 1	4 0	9 0
18	16209655	CACAAC	TATAGT	0 6	0 14	0 17	0 7	0 7	0 17	0 8	0 3	0 5	0 20	0 14	0 7	0 6	0 1	0 1	0 4	0 11	0 4	0 6	0 7	0 9	0 5	0 7	0 7	0 11	0 4	0 8	0 4	0 8	0 0	0 0	0 0	0 11	0 0	0 0	0 3	0 0	0 1	0 1	0 0	0 2	0 0	0 0	0 1	0 0	0 0
18	16209659	A	G	0 6	0 14	0 17	0 7	1 7	0 17	3 8	1 3	1 5	0 20	0 14	0 7	0 6	4 1	0 1	0 4	0 11	0 4	0 6	0 7	0 9	0 5	0 7	0 7	0 11	4 4	0 8	0 4	0 8	0 0	0 0	0 0	0 11	0 0	0 0	0 3	0 0	0 1	0 1	0 0	0 2	0 0	0 0	0 1	0 0	0 0
18	16209663	C	T	0 6	0 14	0 21	0 11	0 9	0 15	0 11	0 6	0 6	0 21	0 15	0 10	0 8	0 4	0 2	0 5	0 11	0 4	0 7	0 8	0 9	0 5	0 7	0 7	0 11	0 8	0 9	0 5	8 0	0 0	0 0	0 0	0 18	0 4	0 5	0 8	0 3	0 5	0 12	0 8	0 12	0 5	0 6	0 8	0 4	0 9
18	16209668	G	A	0 6	0 14	0 22	0 11	0 9	0 18	0 11	0 7	0 6	0 21	0 18	0 11	0 10	0 5	0 3	0 5	0 10	0 5	0 7	0 8	0 11	0 4	0 8	0 7	0 11	0 7	0 11	0 6	0 8	0 0	0 0	0 0	0 19	0 4	0 5	0 8	0 3	0 3	0 11	0 6	0 11	0 5	0 5	0 7	0 3	0 8
18	16209670	C	T	0 7	0 14	0 22	0 12	0 11	0 19	0 11	0 6	0 6	0 21	0 18	0 11	0 10	0 5	0 3	0 5	0 10	0 5	0 7	0 8	0 11	0 5	0 9	0 7	0 12	0 7	0 11	0 6	0 8	0 0	0 0	0 0	0 19	0 4	0 5	3 4	0 3	1 2	1 11	0 7	2 9	0 4	0 5	1 6	0 4	0 8
18	16209684	GC	CT	0 7	0 15	0 23	0 11	0 14	0 19	0 9	0 7	0 7	0 18	0 17	0 15	0 10	0 5	0 3	0 4	0 7	0 5	0 5	0 5	0 14	0 6	0 9	0 9	0 12	0 5	0 11	0 6	0 7	0 0	0 0	0 0	0 15	0 4	0 4	3 1	0 2	1 1	1 8	0 4	2 6	0 3	0 3	1 4	0 2	0 7
18	16209690	G	C	0 7	0 15	0 22	0 11	0 14	0 18	0 7	0 7	0 6	0 19	0 17	0 15	0 11	0 5	0 4	0 4	0 6	0 4	0 4	0 4	0 15	0 5	0 9	0 9	0 13	0 4	0 11	0 6	7 0	0 0	0 0	0 0	0 15	0 3	0 3	0 3	0 2	0 2	0 8	0 4	0 7	0 2	0 3	0 5	0 0	0 7
18	16209701	T	C	0 7	0 12	0 20	0 11	0 15	0 17	0 7	0 9	0 4	0 20	0 16	0 14	0 11	0 6	0 4	0 5	0 4	0 3	0 4	0 4	0 14	1 5	0 8	0 8	0 14	0 3	0 11	0 5	0 0	0 0	0 0	0 0	0 13	0 0	0 0	0 0	0 0	0 0	0 0	0 0	0 0	0 0	0 0	0 0	0 0	0 0
18	16209710	C	T	2 5	0 14	5 17	0 11	1 13	0 16	1 7	2 7	1 5	0 17	0 16	0 15	0 13	2 4	0 4	0 5	0 3	0 3	0 4	0 3	0 14	6 1	0 9	0 8	0 13	1 3	0 12	0 5	0 0	0 0	0 1	0 0	0 13	0 0	0 1	0 0	0 1	0 0	0 2	0 0	0 5	0 4	0 1	0 5	0 3	0 1
18	16209734	A	G	0 5	0 10	0 15	0 14	0 15	0 16	0 7	0 8	0 6	0 14	0 14	0 12	0 13	0 6	0 3	0 4	0 0	0 3	0 6	0 1	0 11	0 6	0 11	0 3	0 6	0 5	0 5	0 2	3 0	0 0	0 2	0 0	0 10	0 0	1 0	0 0	1 0	0 0	3 0	0 0	5 0	5 0	1 0	5 0	3 0	1 0
18	16209743	AT	A	0 5	0 7	0 13	0 11	0 14	0 12	0 4	0 8	0 6	0 9	0 11	0 11	0 13	0 6	0 2	0 5	0 1	0 3	0 6	0 1	0 7	0 4	0 9	0 3	0 6	0 5	0 2	0 3	3 0	0 1	0 2	0 0	0 10	0 0	0 1	0 0	0 1	0 0	0 4	0 0	0 4	0 4	0 1	0 5	0 2	0 1
18	16209751	C	A	0 4	0 6	0 12	0 13	0 14	0 10	0 3	0 6	0 6	0 9	0 10	0 11	0 13	0 6	0 2	0 5	0 1	0 3	0 5	0 1	0 7	0 4	0 10	0 3	0 5	0 7	0 2	0 3	0 4	0 0	0 2	0 0	0 8	0 0	0 1	0 0	0 1	0 0	0 4	0 0	0 3	0 4	0 1	0 5	0 2	0 1
18	16209760	C	T	0 4	0 6	0 9	0 12	0 13	0 10	0 2	0 6	0 5	0 10	0 8	0 10	0 11	0 5	0 1	0 5	0 1	0 3	0 5	0 1	0 7	0 4	0 9	0 5	0 6	0 5	0 2	0 3	0 5	0 1	0 1	0 0	0 5	0 0	0 1	0 0	0 1	0 0	0 4	0 0	0 3	0 4	0 1	0 4	0 2	0 1
18	16209766	ATTC	A	0 2	0 6	0 5	0 10	0 5	0 6	0 1	0 2	0 4	0 6	0 4	0 5	0 5	0 2	0 1	0 1	0 1	0 2	0 2	0 0	0 2	0 3	0 6	0 4	0 4	0 2	0 2	0 2	0 5	0 0	0 0	0 0	0 3	0 0	0 1	0 0	0 1	0 1	0 4	0 1	0 3	0 4	0 1	0 3	0 3	0 1
18	16209769	C	A	0 2	0 6	0 5	0 10	0 5	0 6	0 1	0 2	0 4	2 6	1 4	2 5	2 5	1 2	0 1	4 1	0 1	0 2	0 2	0 0	1 2	0 3	0 6	0 4	0 4	0 2	0 2	0 2	0 5	0 0	0 0	0 0	0 3	0 0	0 1	0 0	0 1	0 1	0 4	0 1	0 3	0 4	0 1	0 3	0 3	0 1
18	16209769	C	T	0 2	0 6	0 5	0 10	0 5	0 6	0 1	2 2	0 4	0 6	0 4	0 5	0 5	0 2	0 1	0 1	0 1	0 2	0 2	0 0	0 2	0 3	0 6	0 4	0 4	3 2	0 2	0 2	0 5	0 0	0 0	0 0	0 3	0 0	0 1	0 0	0 1	0 1	0 4	0 1	0 3	0 4	0 1	0 3	0 3	0 1
18	16209804	GGTAAAAATATTATTGTTTT	AGTAAAAATATTATTGTTTG	0 0	0 2	0 2	0 1	0 0	0 0	0 0	0 0	0 0	0 2	0 0	0 1	0 2	0 0	0 0	0 1	0 0	0 0	0 1	0 0	0 0	0 0	0 0	0 0	0 0	0 0	0 0	0 0	0 0	0 0	0 0	0 0	0 1	0 0	0 0	0 0	0 0	0 0	0 0	0 0	0 0	0 0	0 0	0 0	0 0	0 0
18	16209854	A	G	0 0	0 1	0 2	0 3	0 2	0 0	0 0	0 1	0 0	0 1	0 1	0 0	0 1	0 0	0 0	0 2	0 0	0 0	0 1	0 0	0 0	0 0	0 0	0 3	0 1	0 1	0 0	0 0	0 0	0 0	0 1	0 0	0 1	0 0	0 0	0 0	1 0	1 0	2 0	2 0	1 0	1 0	0 0	0 0	1 0	0 0
18	16209895	T	A	0 0	0 0	0 1	0 0	0 2	0 0	0 0	0 0	0 0	0 0	0 1	0 0	0 0	0 0	0 0	0 1	0 0	0 1	0 2	0 0	0 0	0 0	0 0	0 0	0 0	0 0	0 0	0 0	0 0	0 0	0 1	0 0	0 0	0 0	0 0	0 0	0 1	0 1	0 0	0 3	0 1	0 0	0 0	0 0	0 1	0 0
18	16209905	A	C	0 0	0 0	0 1	0 0	0 1	0 0	0 0	0 0	0 0	0 0	0 1	0 0	0 0	0 0	0 0	0 1	0 0	0 1	1 0	0 0	0 0	0 0	0 0	0 1	0 0	0 0	0 0	0 0	0 0	0 0	1 0	0 0	0 0	0 0	0 0	0 0	0 0	1 0	0 0	3 0	1 0	0 0	0 0	0 0	1 0	0 0
18	16209915	GTGTTGATC	G	0 0	0 0	0 1	0 0	0 0	0 0	0 0	0 0	0 0	0 0	0 0	0 1	0 0	0 0	0 0	0 1	0 0	0 1	0 1	0 0	0 0	0 0	0 0	0 1	0 0	0 0	0 0	0 0	0 0	0 0	0 1	0 0	0 0	0 0	0 0	0 1	0 0	0 0	0 0	0 2	0 1	0 0	0 0	0 0	0 0	0 0
18	16209933	T	A	0 0	0 0	0 1	0 0	0 0	0 0	0 0	0 0	0 0	0 0	0 0	0 1	0 0	0 0	0 0	0 1	0 0	0 1	0 1	0 0	0 0	0 0	0 0	0 1	0 0	0 0	0 0	0 0	0 0	0 0	0 1	0 0	0 0	0 0	0 0	0 1	0 0	0 0	0 0	0 1	0 1	0 0	0 0	0 0	0 0	0 0
18	16209939	C	T	0 0	0 0	0 1	0 0	0 1	0 0	0 0	0 0	0 0	0 0	0 0	0 1	0 0	0 0	0 0	0 0	0 0	0 1	0 1	0 0	0 0	0 0	0 0	0 1	0 0	0 0	0 0	0 0	0 0	0 0	1 0	0 0	0 0	0 0	0 0	1 0	0 0	0 0	0 0	1 0	1 0	0 0	0 0	0 0	0 0	0 0
18	16209947	T	C	0 0	0 0	0 1	0 0	0 1	0 0	0 0	0 0	0 0	0 0	0 0	0 1	0 0	0 0	0 1	0 0	0 0	0 1	0 1	0 0	0 0	0 0	0 0	0 1	0 0	0 0	0 0	0 0	0 0	0 0	0 0	0 0	0 0	0 0	0 0	1 0	0 0	0 0	0 0	1 0	1 0	0 0	0 0	0 0	1 0	0 0
18	16209968	A	T	0 0	0 0	0 1	0 0	0 2	0 0	0 0	0 0	0 0	0 0	0 0	0 1	0 0	0 0	0 1	0 0	0 0	0 1	0 0	0 0	0 0	0 0	0 0	0 1	0 0	0 0	0 0	0 0	0 0	0 0	0 0	0 0	0 0	0 0	0 0	0 1	0 0	0 0	0 1	0 1	0 0	0 0	0 0	0 0	0 1	0 0
18	16210017	G	A	0 0	0 0	0 0	0 0	1 1	0 0	0 0	0 0	0 0	0 0	0 0	0 0	0 0	0 0	1 0	0 0	0 0	0 0	0 1	0 0	0 0	0 0	0 0	0 0	0 0	0 0	0 0	0 0	0 0	0 0	1 0	0 0	0 0	0 0	1 0	1 0	0 0	0 0	2 0	0 0	0 0	2 0	0 0	0 0	1 0	0 0
18	16210043	T	A	0 0	0 0	0 0	0 0	0 0	0 0	0 0	0 0	0 0	0 0	0 0	0 0	0 1	0 0	0 0	0 0	0 0	0 0	0 1	0 0	0 0	0 1	0 0	0 0	0 0	0 0	0 0	0 0	0 1	0 0	0 5	0 0	0 0	0 0	1 0	1 0	0 0	1 0	1 0	1 0	1 0	0 1	0 0	0 1	1 0	0 0
18	16210043	TATTGCC	T	0 0	0 0	0 0	0 0	0 0	0 0	0 0	0 0	0 0	0 0	0 0	0 0	0 1	0 0	0 0	0 0	0 0	0 0	0 1	0 0	0 0	0 1	0 0	0 0	0 0	0 0	0 0	0 0	0 1	0 0	0 5	0 0	0 0	0 0	0 0	2 0	0 0	0 0	1 0	0 0	0 0	2 1	0 0	1 1	0 0	0 0
18	16210057	A	C	0 0	0 0	0 0	0 1	0 0	0 0	0 0	0 0	0 0	0 0	0 0	0 0	0 1	0 0	0 0	0 1	0 0	0 1	0 1	0 0	0 0	0 1	0 1	0 2	0 0	0 0	0 0	0 0	0 1	0 0	0 5	0 0	0 0	0 0	2 0	1 1	0 0	1 0	1 0	1 0	1 0	0 0	1 0	0 1	1 0	0 0
18	16210058	T	A	0 0	0 0	0 0	0 1	0 0	0 0	0 0	0 0	0 0	0 0	0 0	0 0	0 1	0 0	0 0	0 1	0 0	0 1	0 1	0 0	0 0	0 1	0 1	0 2	0 0	0 0	0 0	0 0	0 1	0 0	0 5	0 0	0 0	0 0	0 0	2 1	0 0	0 0	2 0	1 0	0 0	2 0	0 0	1 1	0 0	0 0
18	16210069	G	A	0 0	0 0	0 1	0 1	0 1	0 3	0 0	0 0	0 1	0 0	0 1	0 0	0 2	0 1	0 0	0 2	0 1	0 3	0 2	0 0	0 0	0 3	0 2	0 3	0 0	0 3	0 0	0 0	0 3	0 1	0 8	0 0	0 0	0 0	2 0	3 3	0 0	1 1	2 3	1 1	1 0	0 6	1 0	1 2	1 0	0 0
18	16210072	T	C	0 0	0 0	0 1	0 1	0 1	0 3	0 0	0 0	0 1	0 0	0 1	0 1	0 2	0 1	0 0	0 2	0 1	0 3	0 2	0 0	0 0	0 3	0 2	0 3	0 0	0 3	0 0	0 0	3 0	0 0	0 8	0 0	0 0	0 0	0 2	0 3	0 0	0 1	0 2	0 1	0 1	0 0	0 1	0 1	0 1	0 0
18	16210074	T	G	0 0	0 0	0 1	0 1	0 1	0 3	0 0	0 0	0 1	0 0	0 1	0 1	0 2	0 1	0 0	0 2	0 1	0 3	0 2	0 0	0 0	0 3	0 2	0 3	0 0	0 3	0 0	0 0	0 0	0 0	0 8	0 0	0 0	0 0	0 2	2 3	0 0	0 1	3 2	1 1	0 1	4 0	0 1	1 1	0 1	0 0
18	16210079	AA	TT	0 1	0 1	0 2	0 1	0 1	0 3	0 0	0 2	0 1	0 0	0 1	0 1	0 3	0 1	0 0	0 3	0 1	0 4	0 2	0 0	0 0	0 4	0 2	0 3	0 0	0 4	0 0	0 0	0 4	0 0	0 8	0 0	0 0	0 0	0 0	0 4	0 0	0 0	0 4	0 1	0 1	0 5	0 0	0 2	0 0	0 0
18	16210080	A	T	0 1	0 1	0 2	0 1	0 1	0 3	0 0	0 2	0 1	0 0	0 1	0 1	0 3	0 1	0 0	0 3	0 1	0 4	0 2	0 0	0 0	0 4	0 2	0 3	0 0	0 4	0 0	0 0	0 4	1 0	0 8	0 0	0 0	0 0	2 0	3 4	0 0	2 0	2 4	2 1	1 1	1 5	1 0	1 2	1 0	0 0
18	16210086	G	A	0 1	0 2	0 2	0 1	0 1	0 4	0 0	0 3	0 1	0 1	0 2	0 2	0 4	0 3	0 0	0 3	0 1	0 4	0 2	0 0	0 0	0 4	0 2	0 4	0 2	0 4	0 0	0 0	0 4	0 1	0 8	0 0	0 0	0 0	0 2	3 3	0 0	0 3	3 3	1 2	0 2	4 2	0 1	1 2	0 1	0 0
18	16210086	G	T	0 1	0 2	0 2	0 1	0 1	0 4	0 0	0 3	0 1	0 1	0 2	0 2	0 4	0 3	0 0	0 3	0 1	0 4	0 2	0 0	0 0	0 4	0 2	0 4	0 2	0 4	0 0	0 0	0 4	0 1	0 8	0 0	0 0	0 0	0 2	0 3	0 0	0 3	0 3	0 2	0 2	0 2	0 1	0 2	0 1	0 0
18	16210098	A	T	0 1	0 3	0 2	0 4	0 1	0 6	0 1	0 3	0 2	0 2	0 4	0 5	0 5	0 6	0 0	0 3	0 2	0 5	0 1	0 0	0 1	0 5	0 2	0 4	0 2	0 5	0 0	0 0	0 4	0 1	0 10	0 0	0 0	0 0	0 2	0 7	0 0	0 4	0 6	0 4	0 2	0 6	0 1	0 3	0 0	0 0
18	16210103	T	A	0 1	0 6	0 3	0 5	0 1	0 7	0 2	0 3	0 4	0 2	0 6	0 7	0 6	0 8	0 0	0 3	0 2	0 6	0 1	0 1	0 2	0 6	0 2	0 4	0 2	0 5	0 0	0 0	0 4	0 1	0 9	0 0	0 1	0 0	0 2	3 4	0 0	0 4	3 3	1 3	0 2	4 2	0 2	1 2	0 0	0 0
18	16210103	T	C	0 1	0 6	0 3	0 5	0 1	0 7	0 2	0 3	0 4	0 2	0 6	0 7	0 6	0 8	0 0	0 3	0 2	0 6	0 1	0 1	0 2	0 6	0 2	0 4	0 2	0 5	0 0	0 0	0 4	0 1	0 9	0 0	0 1	0 0	0 2	0 4	0 0	0 4	0 3	0 3	0 2	0 2	0 2	0 2	0 0	0 0
18	16210110	G	A	0 1	0 10	0 3	0 6	0 6	0 7	0 4	0 3	0 5	0 3	0 9	0 8	0 7	0 8	0 0	0 3	0 3	0 7	0 1	0 1	0 3	0 7	0 2	0 7	0 2	0 5	0 1	0 3	0 4	1 0	0 8	0 0	0 1	0 1	0 2	0 7	0 0	0 4	0 5	0 4	0 1	0 5	0 2	0 2	0 0	0 0
18	16210111	C	T	0 1	3 7	0 3	3 3	0 6	0 7	2 2	0 3	0 5	1 2	2 7	1 7	0 7	0 8	0 0	0 4	0 3	0 7	0 1	0 2	0 3	2 5	0 2	0 6	0 2	0 5	0 1	0 3	4 0	0 1	0 9	0 0	0 1	0 1	0 2	4 3	0 0	0 4	3 3	1 3	0 2	3 1	0 2	1 2	0 0	0 0
18	16210126	C	T	0 3	0 11	0 4	0 9	0 6	0 7	0 6	0 3	0 7	0 6	0 11	0 8	0 8	0 8	0 1	0 5	0 3	0 8	0 1	0 4	0 4	0 10	0 2	0 7	0 2	0 5	0 1	0 3	0 3	0 1	0 7	0 0	0 1	0 1	0 2	0 9	0 0	0 4	0 7	0 4	0 2	0 6	0 2	0 2	0 0	0 0
18	16210129	C	G	0 4	0 15	0 4	0 10	0 8	0 9	0 7	0 4	0 10	0 12	0 18	0 9	0 9	0 8	0 3	0 9	0 3	0 10	0 4	0 4	0 6	0 12	0 3	0 11	0 2	0 5	0 1	0 4	0 3	0 1	0 10	0 0	0 1	0 1	0 4	0 9	0 0	0 4	0 8	0 5	0 2	0 6	0 2	0 4	0 0	0 0
18	16210129	C	T	0 4	0 15	0 4	0 10	0 8	0 9	0 7	0 4	0 10	0 12	0 18	0 9	0 9	0 8	0 3	0 9	0 3	0 10	0 4	0 4	0 6	0 12	0 3	0 11	0 2	0 5	0 1	0 4	0 3	0 1	0 10	0 0	0 1	0 1	0 4	0 9	0 0	0 4	0 8	0 5	0 2	0 6	0 2	0 4	0 0	0 0
18	16210132	T	C	0 5	0 17	0 4	0 12	0 9	0 11	0 7	0 6	0 10	0 15	0 18	0 12	0 12	0 8	0 3	0 9	0 6	0 12	0 4	0 4	0 6	0 12	0 3	0 11	0 2	0 5	0 2	0 5	0 3	0 1	0 10	0 0	0 1	0 1	0 4	0 8	0 0	0 4	0 8	0 5	0 2	0 6	0 3	0 3	0 0	0 0
18	16210142	T	A	0 6	2 17	0 6	0 15	0 9	0 13	2 6	0 8	0 11	0 16	4 16	0 14	0 13	0 9	0 3	0 9	0 6	0 12	0 6	0 7	0 8	0 11	0 5	0 11	0 3	0 7	0 2	0 5	0 3	0 1	0 13	0 0	0 2	0 1	0 4	0 9	0 0	0 6	0 8	0 5	0 2	0 6	0 3	0 3	0 0	0 0
18	16210142	T	C	0 6	0 17	0 6	0 15	0 9	0 13	0 6	0 8	0 11	0 16	0 16	0 14	0 13	0 9	0 3	0 9	0 6	0 12	0 6	0 7	0 8	0 11	0 5	0 11	0 3	0 7	0 2	0 5	0 3	0 1	0 13	0 0	0 2	0 1	0 4	0 9	0 0	0 6	0 8	0 5	0 2	0 6	0 3	0 3	0 0	0 0
18	16210143	A	T	0 6	0 19	0 6	0 15	0 9	0 13	0 8	0 8	0 12	0 17	0 20	0 14	0 13	0 9	0 3	0 9	0 6	0 12	0 6	0 7	0 8	0 11	0 5	0 11	0 3	0 7	0 2	0 5	0 3	0 1	0 13	0 0	0 2	0 1	0 4	0 9	0 0	0 6	1 7	0 5	1 1	1 5	0 3	1 3	0 0	0 0
18	16210148	A	C	0 7	0 18	0 7	0 15	0 8	0 15	0 5	0 5	0 9	0 19	0 16	0 16	0 13	0 9	0 3	0 8	0 7	0 13	0 6	0 7	0 8	0 11	0 5	0 12	0 3	0 5	0 2	0 5	0 0	0 0	0 12	0 0	0 3	0 1	0 2	2 3	0 0	0 2	3 2	2 3	0 1	2 0	0 2	2 1	0 0	0 0
18	16210148	ACTGC	TATGT	0 7	0 18	0 7	0 15	0 8	0 15	0 5	0 5	0 9	0 19	0 16	0 16	0 13	0 9	0 3	0 8	0 7	0 13	0 6	0 7	0 8	0 11	0 5	0 12	0 3	0 5	0 2	0 5	0 0	0 0	0 12	0 0	0 3	0 1	0 2	0 3	0 0	0 2	0 2	0 3	0 1	1 0	0 2	0 1	0 0	0 0
18	16210149	C	T	0 7	0 18	0 7	0 15	0 8	0 15	0 5	0 5	0 9	0 19	0 16	0 16	0 13	0 9	0 3	0 8	0 7	0 13	0 6	0 7	0 8	0 11	0 5	0 12	0 3	0 5	0 2	0 5	0 0	0 0	0 12	0 0	0 3	0 1	0 2	0 3	0 0	2 2	1 2	0 3	1 1	3 0	0 2	0 1	0 0	0 0
18	16210150	T	A	0 7	0 18	0 7	0 15	0 8	0 15	0 5	0 5	0 9	0 19	0 16	0 16	0 13	0 9	0 3	0 8	0 7	0 13	0 6	0 7	0 8	0 11	0 5	0 12	0 3	0 5	0 2	0 5	3 0	0 0	0 12	0 0	0 3	0 1	0 2	0 3	0 0	0 2	0 2	0 3	0 1	0 0	0 2	0 1	0 0	0 0
18	16210151	G	A	0 7	0 18	0 7	0 15	0 8	0 15	0 5	0 5	0 9	0 19	0 16	0 16	0 13	0 9	0 3	0 8	0 7	0 13	0 6	0 7	0 8	0 11	0 5	0 12	0 3	0 5	0 2	0 5	0 0	1 0	0 12	0 0	0 3	0 1	2 2	2 3	0 0	1 2	2 2	0 3	0 1	0 0	1 2	0 1	0 0	0 0
18	16210158	C	T	0 8	0 21	0 8	0 15	0 12	0 15	0 10	0 10	0 11	0 22	0 20	0 18	0 14	0 9	0 3	0 8	0 7	0 14	0 6	0 8	0 10	0 11	0 6	0 11	0 3	0 7	0 2	0 5	0 1	0 0	0 11	0 0	0 3	1 0	1 2	3 5	0 0	4 2	2 6	3 2	0 1	2 4	2 2	1 3	0 0	0 0
18	16210181	G	A	0 9	0 27	0 6	0 15	0 13	0 15	0 13	0 11	0 11	0 27	0 24	0 19	0 11	0 9	0 3	0 7	0 9	0 14	5 2	6 5	0 11	0 10	0 5	0 12	0 1	0 4	0 2	0 6	0 1	0 0	0 8	0 0	0 7	0 1	2 1	0 6	0 0	0 4	0 4	0 2	0 1	0 1	0 4	0 1	0 0	0 0
18	16210185	C	T	0 9	0 27	0 6	0 15	0 13	0 15	0 13	0 11	0 11	0 27	0 24	0 19	0 11	0 9	0 3	0 7	0 9	0 14	0 2	0 5	0 11	0 10	0 5	0 12	0 1	0 4	0 2	0 6	0 1	0 0	4 8	0 0	0 7	0 1	0 1	0 6	0 0	2 4	0 4	0 2	0 1	1 1	0 4	0 1	0 0	0 0
18	16210186	G	A	0 10	0 28	0 6	0 18	0 13	0 15	0 13	0 12	0 11	0 26	0 24	0 19	0 11	0 7	0 3	0 7	0 9	0 14	0 7	0 13	0 11	3 7	0 5	0 13	0 1	0 4	0 3	0 6	0 1	0 0	0 11	0 0	0 7	0 1	0 3	0 6	0 0	2 4	0 3	0 2	0 0	1 1	0 4	0 1	0 0	0 0
18	16210187	TGGC	GGGT	0 10	0 27	0 6	0 17	0 2	0 15	0 12	0 12	0 12	0 26	0 23	0 18	0 10	0 7	0 3	0 7	0 4	0 13	0 7	0 13	0 11	0 10	0 5	0 13	0 1	0 3	0 3	0 6	0 1	0 0	0 0	0 0	0 7	0 1	0 1	0 6	0 0	0 2	0 4	0 2	0 1	0 1	0 2	0 1	0 0	0 0
18	16210189	G	A	0 10	0 27	0 6	0 17	11 2	0 15	0 12	0 12	0 12	0 26	0 23	0 18	0 10	0 7	0 3	0 7	5 4	0 13	0 7	0 13	0 11	0 10	0 5	0 13	0 1	0 3	0 3	0 6	0 1	0 0	0 0	0 0	0 7	0 1	0 1	0 6	0 0	2 2	0 4	0 2	0 1	1 1	0 2	0 1	0 0	0 0
18	16210190	C	T	0 10	0 27	0 6	0 17	0 2	0 15	0 12	0 12	0 12	0 26	0 23	0 18	0 10	0 7	0 3	0 7	0 4	0 13	0 7	0 13	0 11	0 10	0 5	0 13	0 1	0 3	0 3	0 6	0 1	0 0	10 0	0 0	0 7	0 1	2 1	0 6	0 0	1 2	0 4	0 2	0 1	0 1	2 2	0 1	0 0	0 0
18	16210196	G	A	0 10	0 26	0 7	0 16	0 13	0 14	7 6	0 13	0 12	0 24	0 25	0 16	7 2	0 4	0 2	0 7	0 8	0 13	0 7	0 13	0 9	3 6	0 5	0 13	0 1	0 3	0 2	0 7	0 1	0 0	0 11	0 0	0 6	0 1	0 3	0 5	0 0	2 3	0 3	0 2	0 0	1 0	0 4	0 1	0 0	0 0
18	16210200	CCTCCTA	TCTCTTG	0 10	0 16	0 3	0 8	0 7	0 10	0 5	0 4	0 4	0 20	0 14	0 8	0 6	0 1	0 1	0 6	0 8	0 7	0 7	0 11	0 6	0 4	0 3	0 9	0 0	0 1	0 2	0 4	0 0	0 0	9 0	0 0	0 6	0 0	0 0	0 0	0 0	0 0	0 0	0 0	0 0	0 0	0 0	0 0	0 0	0 0
18	16210200	CCTCCTAG	TTTCTTGA	0 10	0 16	0 3	0 8	0 7	0 10	0 5	0 4	0 4	0 20	0 14	0 8	0 6	0 1	0 1	0 6	0 8	0 7	0 7	0 11	0 6	0 4	0 3	0 9	0 0	0 1	0 2	0 4	0 0	0 0	0 0	0 0	0 6	0 0	0 0	0 0	0 0	0 0	0 0	0 0	0 0	0 0	0 0	0 0	0 0	0 0
18	16210206	A	G	0 10	2 16	0 3	0 8	2 7	0 10	4 5	10 4	3 4	0 20	5 14	0 8	0 6	1 1	0 1	0 6	0 8	0 7	0 7	0 11	0 6	0 4	0 3	0 9	0 0	2 1	0 2	0 4	1 0	0 0	0 0	0 0	0 6	0 0	0 0	0 0	0 0	0 0	0 0	0 0	0 0	0 0	0 0	0 0	0 0	0 0
18	16210213	G	A	0 9	0 15	0 4	0 6	0 7	0 12	0 8	0 11	0 4	0 16	0 17	0 7	0 6	0 2	0 1	0 8	0 8	0 7	0 7	0 10	0 5	0 9	0 3	0 11	0 0	0 3	0 2	0 5	0 1	0 0	0 9	0 0	0 6	0 0	2 0	1 0	0 0	2 1	1 0	0 2	0 0	1 0	2 1	0 0	0 0	0 0
18	16210220	CAAGT	GAAGC	0 6	0 11	0 4	0 5	0 6	0 10	0 8	0 10	0 3	0 12	0 12	0 6	0 4	0 2	0 1	0 4	0 7	0 6	0 6	0 10	0 4	0 7	0 4	0 9	0 1	0 3	0 1	0 6	0 0	0 0	0 7	0 0	0 6	0 0	2 0	1 0	0 0	1 0	1 0	0 1	0 0	0 0	2 0	0 0	0 0	0 0
18	16210224	T	C	0 6	0 11	0 4	1 5	0 6	0 10	0 8	0 10	1 3	0 12	2 12	0 6	0 4	0 2	0 1	0 4	0 7	0 6	0 6	0 10	0 4	0 7	0 4	0 9	0 1	0 3	0 1	0 6	1 0	0 0	0 7	0 0	0 6	0 0	0 0	0 0	0 0	0 0	0 0	0 1	0 0	0 0	0 0	0 0	0 0	0 0
18	16210228	A	T	0 6	0 11	0 4	0 6	0 5	0 10	0 7	0 11	0 3	0 11	0 10	0 7	0 4	0 3	0 1	0 5	0 7	0 7	0 6	0 10	0 4	0 7	0 3	0 9	0 1	0 4	0 1	0 6	0 1	0 0	0 6	0 0	0 6	0 0	0 2	0 2	0 1	0 2	0 1	0 1	0 0	0 1	0 2	0 0	0 0	0 0
18	16210229	C	T	0 6	0 11	0 4	0 7	0 4	0 10	0 7	0 11	0 3	0 11	0 10	0 7	0 3	0 3	0 1	0 5	0 5	0 7	0 6	1 10	0 4	0 8	0 3	0 9	0 1	0 4	0 1	0 6	0 1	0 0	4 1	0 0	0 6	0 0	0 2	0 2	1 0	0 2	0 1	0 1	0 0	0 1	0 2	0 0	0 0	0 0
18	16210232	GGCGCTTA	G	0 4	0 9	0 4	0 5	0 4	0 9	0 4	0 2	0 1	0 8	0 9	0 7	0 2	0 2	0 1	0 6	0 3	0 6	0 2	0 2	0 3	0 2	0 1	0 9	0 1	0 1	0 1	0 6	0 0	0 0	0 0	0 0	0 5	0 0	0 0	0 0	0 0	0 0	0 0	0 0	0 0	0 0	0 0	0 0	0 0	0 0
18	16210233	G	A	0 4	0 9	0 4	0 5	0 4	0 9	0 4	0 2	0 1	0 8	0 9	0 7	0 2	0 2	0 1	0 6	0 3	0 6	0 2	0 2	0 3	0 2	0 1	0 9	0 1	0 1	0 1	0 6	0 0	0 0	0 0	0 0	0 5	0 0	0 0	0 0	0 0	0 0	0 0	0 0	0 0	0 0	0 0	0 0	0 0	0 0
18	16210234	CGCTTA	TGCTTG	0 4	0 9	0 4	0 5	0 4	0 9	0 4	0 2	0 1	0 8	0 9	0 7	0 2	0 2	0 1	0 6	0 3	0 6	0 2	0 2	0 3	0 2	0 1	0 9	0 1	0 1	0 1	0 6	1 0	0 0	4 0	0 0	0 5	0 0	0 0	0 0	0 0	0 0	0 0	0 0	0 0	1 0	0 0	0 0	0 0	0 0
18	16210239	A	G	0 4	0 9	0 4	0 5	0 4	0 9	0 4	0 2	0 1	0 8	0 9	0 7	0 2	0 2	0 1	0 6	0 3	0 6	3 2	7 2	0 3	0 2	0 1	0 9	0 1	0 1	0 1	0 6	0 0	0 0	1 0	0 0	0 5	0 0	0 0	1 0	1 0	0 0	0 0	0 0	0 0	0 0	0 0	0 0	0 0	0 0
18	16210239	AG	GA	0 4	0 9	0 4	0 5	0 4	0 9	4 4	6 2	1 1	0 8	0 9	0 7	0 2	1 2	0 1	0 6	0 3	0 6	0 2	0 2	0 3	6 2	0 1	0 9	0 1	2 1	0 1	0 6	0 0	0 0	0 0	0 0	0 5	0 0	0 0	0 0	0 0	0 0	0 0	0 0	0 0	0 0	0 0	0 0	0 0	0 0
18	16210248	TCTC	CTTT	0 3	0 8	0 3	0 4	0 4	0 5	0 8	0 7	0 1	0 5	0 8	0 7	0 2	0 4	0 1	0 7	0 2	0 6	0 4	0 9	0 0	0 9	0 2	0 7	0 1	0 4	0 0	0 3	0 0	0 0	0 3	0 0	0 4	0 0	0 0	0 0	0 0	0 0	0 0	0 0	0 0	0 0	0 0	0 0	0 0	0 0
18	16210249	C	T	0 3	0 8	0 3	0 4	0 4	3 5	0 8	0 7	0 1	0 5	0 8	0 7	0 2	0 4	0 1	0 7	0 2	0 6	0 4	0 9	2 0	0 9	0 2	0 7	0 1	0 4	1 0	3 3	0 0	0 0	0 3	0 0	0 4	0 0	0 0	0 0	0 0	0 0	0 0	0 0	0 0	0 0	0 0	0 0	0 0	0 0
18	16210258	GC	G	0 3	0 6	0 2	0 4	0 3	0 9	0 6	0 6	0 1	0 4	0 7	0 5	0 0	0 4	0 1	0 7	0 3	0 5	0 4	0 10	0 2	0 9	0 2	0 12	0 1	0 4	0 1	0 8	0 1	0 0	0 4	0 0	0 4	0 0	0 0	0 1	0 1	0 1	0 1	0 0	0 0	0 0	0 0	3 0	2 0	0 0
18	16210269	GC	AT	0 1	0 1	0 3	0 2	0 1	0 5	0 3	0 3	0 0	0 0	0 3	0 4	0 0	0 3	0 1	0 6	0 4	0 5	0 3	0 8	0 1	0 8	0 2	0 9	0 1	0 6	0 1	0 7	0 1	0 0	0 1	0 0	0 1	0 0	0 2	0 2	0 1	0 1	0 0	0 2	0 1	0 1	0 0	0 1	0 0	0 0
18	16210273	C	T	0 1	0 1	0 3	0 2	0 1	0 5	0 3	0 3	0 0	0 0	0 3	0 4	0 0	0 3	0 1	0 6	0 4	0 5	0 3	0 8	0 1	0 8	0 2	0 9	0 1	0 6	0 1	0 7	0 1	0 0	0 1	0 0	0 1	0 0	0 2	0 2	0 1	0 1	0 0	1 2	0 1	0 1	1 0	2 1	4 0	0 0
18	16210274	G	A	0 0	0 1	0 3	0 2	0 1	1 4	0 5	1 3	0 0	0 2	0 2	0 3	0 1	2 1	0 0	0 7	2 4	1 5	0 3	2 8	0 1	0 8	0 2	5 5	0 2	0 6	0 1	1 6	0 1	0 0	0 2	0 0	0 0	0 1	0 3	0 4	0 2	0 1	0 1	0 5	0 1	0 2	0 2	0 4	0 4	0 0
18	16210276	G	C	0 0	0 1	0 3	0 2	0 1	0 5	0 5	2 2	0 0	0 2	0 2	0 3	0 1	1 1	0 0	0 7	0 6	0 6	0 3	0 11	0 1	0 8	0 2	0 10	0 2	3 3	0 1	0 7	0 1	0 0	0 2	0 0	0 0	0 1	0 3	0 4	0 4	0 1	0 1	0 5	0 2	0 3	0 2	0 5	0 4	0 0
18	16210277	G	A	0 0	0 1	0 3	0 2	0 3	0 5	0 5	0 4	0 0	0 2	0 2	0 3	0 1	0 2	0 0	0 7	0 6	0 5	0 3	0 11	0 1	7 1	0 2	0 10	0 2	0 6	0 1	0 7	0 1	0 0	0 2	0 0	0 0	0 1	0 3	0 4	0 4	0 1	0 1	0 5	0 2	0 3	0 2	0 5	0 4	0 0
18	16210289	G	A	0 0	0 1	0 3	0 1	0 3	0 3	0 7	0 3	0 2	0 3	0 1	0 3	0 1	0 2	0 0	0 8	0 5	0 4	0 4	0 9	0 2	0 9	0 2	0 10	0 2	0 7	0 0	0 6	0 0	0 0	0 1	0 0	0 1	0 2	0 3	4 3	1 4	0 3	0 2	0 4	0 4	0 3	0 4	0 5	0 5	0 0
18	16210290	G	A	0 0	0 1	0 3	0 1	0 3	1 3	0 8	0 3	0 3	0 3	0 2	0 3	0 1	0 3	0 0	0 8	0 6	0 5	0 5	0 9	0 2	0 9	0 2	0 11	0 2	0 7	0 0	1 6	0 0	0 0	0 1	0 0	0 1	0 2	0 3	0 6	0 5	0 4	1 1	1 4	3 1	0 3	2 2	2 2	4 1	0 0
18	16210291	G	A	0 0	0 1	0 3	0 1	0 3	0 4	0 8	0 3	0 3	0 3	0 2	0 3	0 1	0 3	0 0	0 8	0 6	0 5	0 5	0 9	0 2	0 9	0 2	0 10	0 2	0 7	0 0	0 7	0 1	0 0	0 1	0 0	0 1	0 2	0 3	0 7	0 5	0 4	0 1	0 5	0 4	0 3	0 4	0 4	0 5	0 0
18	16210292	C	T	0 0	0 1	0 3	0 0	0 3	0 4	0 7	0 3	0 3	0 3	0 2	0 3	0 1	0 2	0 0	0 8	0 4	0 4	0 5	0 9	0 2	0 9	0 2	0 10	0 2	0 7	0 0	0 5	0 1	0 0	0 1	0 0	0 1	1 1	0 3	2 5	1 4	0 4	0 2	2 2	0 4	0 4	2 2	1 4	0 5	0 0
18	16210294	C	T	0 0	0 1	0 3	0 0	0 3	0 3	0 7	0 3	0 4	0 4	0 2	0 3	0 1	0 2	0 0	0 8	0 5	0 3	0 5	0 9	0 2	0 9	0 2	0 10	0 2	0 7	0 1	0 5	0 1	0 0	0 1	0 0	0 1	0 2	0 2	0 7	0 4	0 5	0 2	0 4	0 4	0 4	0 5	0 5	0 5	0 0
18	16210300	G	A	0 0	0 0	0 4	0 0	0 3	0 2	0 8	0 2	0 4	0 4	0 1	0 3	0 1	0 0	0 0	0 8	0 5	0 2	0 4	0 8	0 1	0 10	0 2	0 10	0 2	0 6	0 1	0 5	0 1	0 0	0 1	0 0	0 1	0 2	0 3	0 7	2 4	0 7	0 2	0 4	0 4	0 4	0 6	0 4	0 5	0 1
18	16210303	ATGGC	CTGGG	0 0	0 0	0 4	0 0	0 3	0 2	0 8	0 1	0 4	0 4	0 1	0 2	0 1	0 2	0 0	0 5	0 4	0 2	0 2	0 4	0 1	0 7	0 2	0 8	0 2	0 4	0 1	0 4	0 0	0 0	0 1	0 0	0 1	0 1	2 1	4 1	3 1	6 1	1 1	1 1	3 1	2 3	3 0	3 1	4 0	0 0
18	16210306	G	A	0 0	0 0	0 4	0 0	0 3	0 2	0 8	0 1	0 4	0 4	0 1	0 2	0 1	0 2	0 0	0 5	0 4	0 2	0 2	0 4	0 1	2 7	0 2	0 8	0 2	0 4	0 1	0 4	0 0	0 0	0 1	0 0	0 1	1 1	0 1	2 1	1 1	0 1	0 1	2 1	0 1	0 3	3 0	1 1	0 0	1 0
18	16210306	G	C	0 0	0 0	0 4	0 0	0 3	0 2	0 8	0 1	0 4	0 4	0 1	0 2	0 1	0 2	0 0	0 5	0 4	0 2	2 2	2 4	0 1	0 7	0 2	0 8	0 2	0 4	0 1	0 4	0 0	0 0	0 1	0 0	0 1	0 1	0 1	0 1	0 1	0 1	0 1	0 1	0 1	0 3	0 0	0 1	0 0	0 0
18	16210312	G	C	0 1	0 0	0 3	0 0	0 2	0 1	0 7	0 1	0 4	0 4	0 1	0 0	0 2	0 2	0 0	0 5	0 4	0 2	0 3	0 4	0 1	0 9	0 2	0 7	0 2	0 2	0 1	0 5	0 0	0 0	0 1	0 0	0 0	1 1	0 3	2 5	1 6	0 7	0 2	2 2	0 4	0 4	3 4	1 3	0 4	1 0
18	16210314	C	T	0 1	0 0	0 3	0 0	0 2	0 1	0 7	0 1	0 4	0 5	0 1	0 1	0 2	0 2	0 0	0 6	0 4	0 2	0 4	0 5	0 2	0 9	0 2	0 7	0 2	0 2	0 1	0 5	0 0	0 0	0 1	0 0	0 1	0 2	0 4	0 7	0 6	0 7	0 3	0 4	0 4	1 5	0 7	0 5	0 4	0 1
18	16210323	GGCA	AGCC	0 1	0 0	0 2	0 0	0 2	0 1	0 3	0 1	0 4	0 6	0 0	0 1	0 2	0 2	0 0	0 7	0 2	0 0	0 3	0 1	0 2	0 4	0 0	0 3	0 0	0 2	0 2	0 5	0 0	0 0	0 0	0 0	0 1	0 0	3 0	5 0	1 0	0 0	3 0	0 0	0 0	0 0	0 0	0 0	0 0	0 0
18	16210326	A	C	0 1	0 0	0 2	0 0	0 2	0 1	0 3	0 1	0 4	0 6	0 0	0 1	0 2	0 2	0 0	0 7	0 2	0 0	0 3	0 1	0 2	0 4	0 0	0 3	0 0	0 2	0 2	0 5	0 0	0 0	0 0	0 0	0 1	1 0	0 0	1 0	4 0	7 0	0 0	3 0	3 0	2 0	8 0	3 0	3 0	1 0
18	16210326	A	T	0 1	0 0	0 2	0 0	0 2	0 1	3 3	0 1	0 4	0 6	1 0	0 1	0 2	0 2	0 0	0 7	0 2	1 0	0 3	1 1	0 2	0 4	1 0	1 3	0 0	0 2	0 2	0 5	0 0	0 0	0 0	0 0	0 1	0 0	0 0	0 0	0 0	0 0	0 0	0 0	0 0	0 0	0 0	0 0	0 0	0 0
18	16210329	G	A	0 1	0 0	0 3	0 1	0 3	0 1	0 8	0 1	0 2	0 6	0 2	0 1	0 3	0 3	0 0	0 6	0 4	0 1	0 4	0 2	0 1	0 8	0 1	0 4	0 0	0 2	0 2	0 5	0 0	0 0	0 0	0 0	0 0	0 1	0 4	0 7	0 5	0 9	0 4	0 4	0 5	0 3	0 8	0 5	0 4	0 2
18	16210330	T	C	0 1	0 0	0 3	0 1	0 3	0 1	0 8	0 1	2 2	0 6	0 2	1 1	0 3	0 3	0 0	0 6	0 4	0 1	0 4	0 2	0 1	1 8	0 1	1 4	0 0	0 2	0 2	0 5	0 0	0 0	0 0	0 0	1 0	0 1	0 4	0 7	0 5	0 9	0 4	0 4	0 5	0 3	0 8	0 5	0 4	0 2
18	16210334	GC	AG	0 1	0 0	0 3	0 1	0 4	0 2	0 4	0 2	0 2	0 6	0 1	0 3	0 3	0 3	0 0	0 5	0 4	0 1	0 4	0 2	0 1	0 8	0 1	0 4	0 1	0 2	0 2	0 6	0 0	0 0	0 0	0 0	0 0	0 1	0 4	2 5	0 4	0 9	0 4	0 4	0 5	0 4	3 5	0 5	0 4	0 2
18	16210335	C	T	0 1	0 0	0 3	0 1	0 4	0 2	0 4	0 2	0 2	0 6	0 1	0 3	0 3	0 3	0 0	0 5	0 4	0 1	0 4	0 2	0 1	0 8	0 1	0 4	0 1	0 2	0 2	0 6	0 0	0 0	0 0	0 0	0 0	0 1	0 4	0 5	0 4	0 9	0 4	0 4	0 5	0 4	0 5	0 5	0 4	0 2
18	16210340	C	T	0 1	0 0	0 2	0 1	0 4	0 2	0 7	0 2	0 2	0 6	0 2	0 3	0 3	0 3	0 0	0 5	0 4	0 1	2 2	1 1	0 1	0 9	0 0	0 3	0 1	0 4	0 3	0 6	0 0	0 0	0 0	0 0	0 0	0 1	1 3	0 7	0 5	0 9	0 4	1 3	1 5	0 3	0 8	0 4	0 4	0 2
18	16210341	C	A	0 1	0 0	0 2	0 1	2 2	0 2	1 3	0 2	1 1	0 6	0 1	0 3	0 3	3 1	0 0	0 5	0 4	0 1	0 4	0 1	0 1	0 9	0 0	0 3	0 1	1 3	0 3	0 6	0 0	0 0	0 0	0 0	0 0	0 0	0 4	0 5	0 4	0 10	0 5	0 2	0 6	0 4	0 5	0 4	0 4	0 1
18	16210342	A	C	0 1	0 0	0 2	0 1	0 2	0 2	0 3	0 2	0 1	0 6	0 1	0 3	0 3	0 1	0 0	0 5	0 4	0 1	0 4	0 1	0 1	0 9	0 0	0 3	0 1	0 3	0 3	0 6	0 0	0 0	0 0	0 0	0 0	1 0	0 4	2 5	1 4	0 10	0 5	2 2	0 6	0 4	3 5	1 4	0 4	1 1
18	16210349	G	A	0 1	0 0	0 2	0 1	0 4	0 3	0 8	0 2	0 2	0 6	0 4	0 3	0 3	0 4	0 0	0 5	0 4	0 1	0 3	0 1	0 1	0 8	0 0	0 4	0 1	0 3	0 3	0 6	0 0	0 0	0 0	0 0	0 1	0 1	2 0	6 2	5 1	11 0	4 0	3 3	5 1	3 1	5 3	3 1	4 0	1 1
18	16210354	G	A	0 1	0 1	0 2	0 1	0 3	0 3	0 8	0 2	0 3	0 6	0 4	0 3	0 3	0 4	0 0	0 5	0 5	0 1	0 3	0 1	0 1	0 8	0 0	0 4	0 1	0 3	0 3	0 7	0 0	0 0	0 0	0 0	0 1	0 1	0 3	0 9	0 6	0 12	0 5	0 7	0 7	0 4	0 9	0 5	0 4	0 2
18	16210370	C	T	0 1	0 1	0 2	0 1	0 4	0 4	0 6	0 1	0 3	0 7	0 4	0 4	0 3	0 4	0 0	0 4	0 5	0 4	0 3	0 1	0 1	0 7	0 1	0 4	0 1	0 3	0 3	0 7	0 0	0 0	0 0	0 0	0 1	0 0	0 7	0 16	0 7	0 12	0 7	1 5	1 6	0 3	0 9	0 6	0 5	0 1
18	16210379	CACCAT	TAACAC	0 1	0 2	0 3	0 2	0 4	0 5	0 6	0 1	0 5	0 10	0 4	0 5	0 3	0 4	0 0	0 5	0 5	0 3	0 1	0 3	0 0	0 8	0 2	0 6	0 1	0 3	0 3	0 7	0 0	0 0	0 0	0 0	0 1	0 0	0 0	0 0	0 0	0 0	0 0	0 0	0 0	0 0	0 0	0 0	0 0	0 0
18	16210381	CCAT	TCAC	0 1	0 2	0 3	0 2	0 4	0 5	0 6	0 1	0 5	0 10	0 4	0 5	0 3	0 4	0 0	0 5	0 5	0 3	0 1	0 3	0 0	0 8	0 2	0 6	0 1	0 3	0 3	0 7	0 0	0 0	0 0	0 0	0 1	0 0	0 0	0 0	6 0	5 0	0 0	0 0	0 0	0 0	0 0	0 0	0 0	0 0
18	16210384	T	C	0 1	0 2	0 3	0 2	0 4	0 5	0 6	0 1	0 5	0 10	0 4	0 5	0 3	0 4	0 0	0 5	0 5	0 3	0 1	0 3	0 0	0 8	0 2	0 6	0 1	0 3	0 3	0 7	1 0	0 0	0 0	0 0	0 1	0 0	7 0	16 0	2 0	7 0	10 0	5 0	9 0	3 0	7 0	6 0	5 0	2 0
18	16210391	C	T	0 1	0 3	0 3	0 2	0 4	0 5	0 5	0 1	0 6	0 10	0 4	0 11	0 3	0 5	0 0	0 6	0 5	0 4	0 2	0 3	0 2	0 9	0 3	0 6	0 1	0 3	0 2	0 9	1 0	0 0	0 1	0 0	0 1	0 0	0 9	0 16	0 10	0 12	0 9	0 5	0 10	0 4	0 8	0 7	0 3	0 2
18	16210399	A	G	0 1	0 3	0 2	0 2	0 4	0 6	0 5	0 2	0 8	0 11	0 4	0 11	0 3	0 5	0 0	0 8	0 5	0 6	0 2	0 4	0 2	0 7	0 3	0 6	0 1	0 3	0 2	0 7	0 1	0 0	0 3	0 0	0 1	1 0	10 0	17 0	8 1	11 1	9 0	3 0	9 1	4 1	6 2	4 1	2 0	2 0
18	16210407	C	T	0 1	0 6	0 2	0 2	0 6	0 9	0 8	0 5	0 8	0 14	0 7	0 15	0 3	0 6	0 0	0 8	0 5	0 5	0 2	0 4	0 3	0 8	0 4	0 9	0 2	0 4	0 2	0 9	0 1	0 0	0 4	0 0	0 2	1 0	2 8	0 17	0 9	7 5	4 5	2 0	9 0	4 1	5 2	4 1	2 0	2 0
18	16210408	C	T	0 1	0 6	0 2	0 2	0 6	0 8	0 8	0 4	0 8	0 14	0 7	0 13	0 3	0 6	0 0	0 8	0 5	0 5	0 2	0 4	0 3	0 8	0 4	0 9	0 2	0 4	0 2	0 8	0 1	0 0	0 4	0 0	0 2	0 1	0 10	0 17	0 9	0 12	0 10	0 3	0 9	0 4	0 7	0 5	0 2	0 2
18	16210409	A	C	0 1	0 7	0 2	0 2	0 6	0 9	0 8	0 5	0 8	0 15	0 7	0 13	0 4	0 6	0 0	0 8	0 5	0 6	0 2	0 4	0 3	0 8	0 4	0 9	0 2	0 4	0 3	0 9	0 1	0 0	0 4	0 0	0 2	0 1	0 10	0 15	0 8	0 11	0 9	0 3	0 9	0 4	0 7	0 5	0 2	0 2
18	16210414	A	C	0 3	0 8	0 4	0 2	3 3	0 10	2 6	2 3	1 7	0 15	0 9	0 12	0 3	3 4	0 0	0 7	0 4	0 6	1 2	2 3	0 3	3 5	0 4	0 9	0 2	1 3	0 3	0 9	1 0	0 0	4 0	0 0	0 2	1 0	9 0	18 0	9 1	13 1	10 0	5 0	9 0	3 1	7 2	6 1	1 0	1 0
18	16210424	C	T	0 4	0 8	0 4	0 1	0 5	0 15	0 7	0 3	0 6	0 11	0 9	0 12	0 2	0 5	0 0	0 7	0 3	0 8	0 3	0 6	0 3	0 6	0 4	0 10	0 2	0 5	0 3	0 9	0 1	0 0	0 4	0 0	0 2	0 4	0 8	0 20	0 2	0 8	0 11	0 5	0 10	0 4	0 7	0 7	0 2	0 2
18	16210426	C	T	0 4	0 8	0 4	0 1	0 5	0 15	0 7	0 3	0 6	0 11	0 9	0 12	0 2	0 5	0 0	0 7	0 3	0 8	0 3	0 6	0 3	0 6	0 4	0 10	0 2	0 5	0 3	0 9	0 1	0 0	0 4	0 0	0 2	0 4	0 8	0 20	7 2	7 8	0 11	0 5	0 10	0 4	0 7	0 7	0 2	0 2
18	16210427	C	A	0 6	0 10	0 4	0 2	0 6	0 17	0 7	0 6	0 8	0 15	0 10	0 12	0 3	0 5	0 1	0 7	0 3	0 8	0 5	0 7	0 6	0 6	0 5	0 12	0 2	0 6	0 3	0 10	0 1	0 1	0 4	0 0	0 7	0 5	0 8	0 20	0 11	0 16	0 12	0 4	0 10	0 5	0 10	0 9	0 3	0 4
18	16210430	C	T	0 6	0 10	0 3	0 3	0 6	0 18	0 7	0 6	0 10	0 15	0 11	0 13	0 3	0 5	0 1	0 7	0 2	0 8	0 5	0 8	0 6	2 3	0 5	0 14	0 1	0 6	0 2	0 10	1 0	0 1	0 4	0 0	0 8	1 4	0 8	0 18	1 10	0 17	0 11	0 5	0 10	0 5	1 10	1 8	0 4	1 3
18	16210435	G	T	0 7	0 15	0 5	0 4	0 5	0 17	0 7	0 9	0 11	0 15	0 19	0 13	0 3	0 5	0 1	0 8	0 2	0 9	0 6	0 10	0 5	0 5	0 5	0 15	0 1	0 5	0 4	0 9	0 2	0 1	0 5	0 0	0 8	1 4	2 6	0 20	0 11	8 7	3 8	4 1	5 3	3 2	7 2	7 3	2 2	3 1
18	16210440	G	A	0 9	0 17	0 7	0 6	0 5	0 20	0 8	0 10	0 12	0 17	0 22	0 13	0 5	0 5	0 1	0 8	0 3	0 9	0 6	0 11	0 6	0 6	0 5	0 15	0 1	0 5	0 3	0 8	0 2	0 1	0 5	0 0	0 10	0 4	0 8	0 20	0 11	0 17	0 16	0 6	0 10	0 5	0 10	0 11	0 5	0 4
18	16210445	C	T	0 9	0 15	0 5	0 6	0 5	0 21	0 8	0 6	0 12	0 16	0 12	0 10	0 5	0 3	0 1	0 7	0 2	0 11	0 6	0 10	0 6	0 7	0 5	0 14	0 1	0 5	0 3	0 7	0 0	0 1	0 5	0 0	5 5	1 1	7 0	20 1	8 0	10 0	10 1	6 1	6 1	1 0	4 0	6 1	2 3	3 0
18	16210445	CTTCC	TTTCT	0 9	0 15	0 5	0 6	0 5	0 21	0 8	0 6	0 12	0 16	0 12	0 10	0 5	0 3	0 1	0 7	0 2	0 11	0 6	0 10	0 6	0 7	0 5	0 14	0 1	0 5	0 3	0 7	0 0	0 1	0 5	0 0	0 5	0 1	0 0	0 1	0 0	0 0	0 1	0 1	0 1	0 0	0 0	0 1	0 3	0 0
18	16210451	T	C	0 9	5 15	4 5	0 6	0 5	0 21	0 8	5 6	0 12	0 16	7 12	0 10	0 5	0 3	0 1	0 7	0 2	0 11	0 6	0 10	0 6	0 7	0 5	0 14	0 1	0 5	0 3	0 7	1 0	0 1	0 5	0 0	0 5	1 1	0 0	0 1	1 0	1 0	1 1	0 1	1 1	0 0	1 0	1 1	0 3	1 0
18	16210455	G	A	0 9	0 23	0 9	0 7	0 5	0 21	0 9	0 13	0 11	0 18	0 22	0 12	0 6	0 7	0 1	0 8	0 5	0 15	0 7	0 11	0 8	0 9	0 6	0 15	0 1	0 6	0 3	0 8	0 2	0 1	6 0	0 0	0 11	0 3	0 9	0 22	0 10	0 14	0 12	0 7	0 9	0 3	0 8	0 10	0 5	0 4
18	16210461	G	A	0 9	0 24	0 10	0 8	0 5	0 21	0 9	0 13	0 11	0 18	0 23	0 13	0 6	0 8	0 1	0 6	0 5	0 15	0 7	0 11	0 8	0 10	0 6	0 14	0 1	0 6	0 3	0 8	0 4	0 1	0 6	0 0	0 12	0 3	0 9	0 22	0 10	0 14	0 13	0 7	1 8	0 4	0 8	0 10	0 5	0 5
18	16210464	A	C	0 9	0 18	0 5	0 9	0 5	0 20	0 8	0 8	0 10	0 17	0 13	0 10	0 5	0 7	0 1	0 6	0 5	0 12	0 7	0 11	0 8	0 9	0 6	0 12	0 2	0 6	0 3	0 8	0 0	1 0	0 6	0 0	0 7	0 0	0 0	0 0	0 0	0 0	0 0	0 0	0 0	0 0	0 0	0 0	0 0	0 0
18	16210468	CA	GCG	0 9	0 18	0 5	0 9	0 5	0 20	0 8	0 8	0 10	0 17	0 13	0 10	0 5	0 7	0 1	0 6	0 5	0 12	0 7	0 11	0 8	0 9	0 6	0 12	0 2	0 6	0 3	0 8	0 0	0 0	0 6	0 0	0 7	0 0	0 0	0 0	0 0	1 0	1 0	0 0	0 0	0 0	0 0	0 0	0 0	0 0
18	16210468	CA	TG	0 9	0 18	0 5	0 9	0 5	0 20	0 8	0 8	0 10	0 17	0 13	0 10	0 5	0 7	0 1	0 6	0 5	0 12	0 7	0 11	0 8	0 9	0 6	0 12	0 2	0 6	0 3	0 8	0 0	0 0	0 6	0 0	0 7	0 0	7 0	18 0	4 0	0 0	7 0	1 0	1 0	0 0	0 0	0 0	0 0	0 0
18	16210469	A	G	0 9	0 18	0 5	0 9	0 5	0 20	0 8	0 8	0 10	0 17	0 13	0 10	0 5	0 7	0 1	0 6	0 5	0 12	0 7	0 11	0 8	0 9	0 6	0 12	0 2	0 6	0 3	0 8	0 0	0 0	0 6	0 0	6 7	1 0	2 0	0 0	4 0	11 0	3 0	4 0	7 0	2 0	4 0	6 0	2 0	4 0
18	16210469	AC	GA	0 9	0 18	0 5	0 9	0 5	0 20	0 8	0 8	0 10	0 17	0 13	0 10	0 5	0 7	0 1	0 6	0 5	0 12	0 7	0 11	0 8	0 9	0 6	0 12	0 2	0 6	0 3	0 8	4 0	0 0	0 6	0 0	0 7	0 0	0 0	0 0	0 0	0 0	0 0	1 0	0 0	0 0	0 0	0 0	0 0	0 0
18	16210474	G	A	0 10	0 24	0 11	0 11	0 5	0 20	0 9	0 13	0 7	0 15	0 22	0 13	0 7	0 8	0 1	0 6	0 4	0 12	3 4	6 3	0 8	0 10	0 4	0 10	0 2	0 9	0 2	0 8	0 0	0 2	0 7	0 0	0 12	0 2	0 3	0 0	0 6	0 12	0 4	0 5	0 7	0 6	0 6	0 6	0 3	0 4
18	16210475	T	C	0 10	0 24	0 11	0 11	0 5	0 20	0 9	0 13	0 7	0 15	0 22	0 13	0 7	0 8	0 1	0 6	0 4	0 12	0 4	0 3	0 8	0 10	0 4	0 10	0 2	0 9	0 2	0 8	4 0	0 2	0 7	0 0	0 12	0 2	0 3	0 0	0 6	0 12	0 4	0 5	0 7	0 6	0 6	0 6	0 3	0 4
18	16210477	GC	AT	0 10	0 24	0 11	0 11	0 5	0 20	0 9	0 13	0 7	0 15	0 22	0 13	0 7	0 8	0 1	0 6	0 4	0 12	0 4	0 3	0 8	0 10	0 4	0 10	0 2	0 9	0 2	0 8	0 0	0 2	0 7	0 0	0 12	0 2	0 3	18 0	4 6	0 12	0 4	0 5	0 7	0 6	0 6	0 6	0 3	0 4
18	16210478	C	T	0 10	0 24	0 11	0 11	0 5	0 20	0 9	0 13	0 7	0 15	0 22	0 13	0 7	0 8	0 1	0 6	0 4	0 12	0 4	0 3	0 8	0 10	0 4	0 10	0 2	0 9	0 2	0 8	0 0	0 2	0 7	0 0	0 12	0 2	8 3	0 0	0 6	0 12	6 4	1 5	0 7	0 6	0 6	0 6	0 3	0 4
18	16210480	C	T	0 10	0 24	0 11	0 11	0 5	0 20	0 9	0 13	0 7	0 15	0 22	0 13	0 7	0 8	0 1	0 6	0 4	0 12	0 4	0 3	0 8	0 10	0 4	0 10	0 2	0 9	0 2	0 8	0 0	0 2	0 7	0 0	0 12	0 2	0 3	0 0	0 6	0 12	0 4	0 5	0 7	0 6	0 6	0 6	0 3	0 4
18	16210483	GGGCTGT	CGACTGC	0 10	0 19	0 7	0 11	0 10	0 18	0 8	0 9	0 7	0 16	0 15	0 13	0 9	0 7	0 1	0 6	0 1	0 9	0 6	0 6	0 10	0 3	0 1	0 8	0 0	0 7	0 2	0 7	0 0	1 0	0 0	0 0	0 6	0 0	0 0	0 0	2 0	1 0	0 0	0 0	0 0	2 0	2 0	1 0	0 0	0 0
18	16210486	C	A	0 10	0 19	0 7	0 11	0 10	0 18	0 8	0 9	0 7	0 16	0 15	0 13	0 9	0 7	0 1	0 6	3 1	3 9	0 6	3 6	0 10	0 3	3 1	3 8	3 0	0 7	0 2	0 7	0 0	0 0	0 0	0 0	0 6	0 0	0 0	0 0	0 0	0 0	0 0	0 0	0 0	0 0	0 0	0 0	0 0	0 0
18	16210486	CTGT	TTGC	0 10	0 19	0 7	0 11	0 10	0 18	0 8	0 9	0 7	0 16	0 15	0 13	0 9	0 7	0 1	0 6	0 1	0 9	0 6	0 6	0 10	0 3	0 1	0 8	0 0	0 7	0 2	0 7	0 0	0 0	0 0	0 0	6 6	2 0	11 0	18 0	8 0	12 0	10 0	4 0	5 0	3 0	4 0	6 0	3 0	4 0
18	16210488	GT	AC	0 10	0 19	0 7	0 11	0 10	0 18	0 8	0 9	0 7	0 16	0 15	0 13	0 9	0 7	0 1	0 6	0 1	0 9	0 6	0 6	0 10	0 3	0 1	0 8	0 0	0 7	0 2	0 7	0 0	0 0	0 0	0 0	0 6	0 0	0 0	0 0	0 0	0 0	0 0	0 0	0 0	0 0	0 0	0 0	0 0	0 0
18	16210489	T	C	0 10	6 19	5 7	0 11	0 10	1 18	0 8	5 9	0 7	0 16	8 15	3 13	0 9	1 7	0 1	0 6	0 1	0 9	0 6	0 6	0 10	6 3	0 1	0 8	0 0	0 7	0 2	0 7	0 0	0 0	1 0	0 0	0 6	1 0	0 0	1 0	0 0	0 0	1 0	1 0	1 0	0 0	0 0	1 0	3 0	0 0
18	16210489	TC	CT	0 10	0 19	0 7	0 11	0 10	0 18	0 8	0 9	0 7	0 16	0 15	0 13	0 9	0 7	0 1	0 6	0 1	0 9	0 6	0 6	0 10	0 3	0 1	0 8	0 0	0 7	0 2	0 7	4 0	0 0	0 0	0 0	0 6	0 0	0 0	0 0	0 0	0 0	0 0	0 0	0 0	0 0	0 0	0 0	0 0	0 0
18	16210491	T	A	0 10	0 25	0 12	0 12	0 10	0 19	0 8	0 16	0 8	0 17	0 24	0 16	0 8	0 8	0 2	0 7	0 5	0 13	0 6	0 10	0 10	0 9	0 4	0 13	0 3	0 8	0 2	0 7	0 4	0 1	0 6	0 0	0 12	0 4	0 11	0 21	0 12	0 14	0 13	0 6	0 7	0 6	0 8	0 11	0 6	0 4
18	16210495	C	T	0 10	0 23	0 12	0 11	0 10	0 19	0 8	0 15	0 8	0 17	0 23	0 16	0 8	0 8	0 1	0 7	0 5	0 12	0 6	6 4	0 10	0 9	0 4	0 12	0 3	0 8	0 1	0 7	0 4	0 1	0 6	0 0	0 12	0 4	0 10	0 21	0 9	1 11	1 12	0 5	0 7	0 5	0 8	0 11	0 6	0 4
18	16210503	G	A	0 9	1 22	1 10	0 11	0 8	1 17	0 6	0 13	0 8	0 15	1 20	3 11	0 8	1 5	0 2	0 7	0 5	0 11	0 6	0 10	0 9	1 7	0 4	0 10	0 3	0 6	0 0	0 5	0 4	0 1	0 7	0 0	0 11	0 4	0 8	1 18	0 11	0 13	0 13	0 5	1 6	1 5	0 7	0 11	0 6	0 4
18	16210514	T	A	0 6	0 20	0 9	0 9	0 8	0 14	0 5	0 12	0 8	0 13	0 17	0 12	0 6	0 5	0 2	0 7	0 7	0 11	0 5	0 8	0 7	0 8	0 3	0 7	0 2	0 6	0 0	0 4	0 4	0 1	0 6	0 0	0 11	0 2	0 10	0 15	0 11	0 13	0 11	0 4	0 6	0 6	0 8	0 9	0 3	0 4
18	16210518	G	A	0 4	0 18	0 9	0 8	0 7	0 9	0 4	0 11	0 6	0 8	0 15	0 10	0 4	0 4	0 1	0 5	0 6	0 11	0 3	0 7	0 5	0 7	0 2	0 6	0 3	0 5	0 0	0 3	0 4	1 0	0 7	0 0	0 7	0 2	0 8	0 12	0 9	0 12	0 10	0 4	0 6	0 5	0 9	0 8	0 1	0 4
18	16210519	G	A	0 4	0 18	0 9	0 8	0 7	0 9	0 4	0 11	0 6	0 8	0 15	0 10	0 4	0 4	0 1	0 5	0 6	0 11	0 3	0 7	0 5	0 7	0 2	0 6	0 3	0 5	0 0	0 3	0 4	0 0	0 7	0 0	0 7	0 2	0 8	0 12	0 9	0 12	0 10	0 4	0 6	0 5	0 9	0 8	0 1	0 4
18	16210529	T	A	0 2	0 14	1 5	0 6	0 4	0 6	0 4	0 6	0 6	0 5	1 7	0 9	0 1	0 4	0 1	0 3	0 5	0 10	0 1	0 5	0 3	0 7	0 1	0 4	0 3	0 4	0 0	0 2	0 3	0 1	0 8	0 0	0 5	0 2	0 7	0 12	0 8	0 12	0 8	0 4	0 4	0 5	0 6	0 8	0 2	0 5
18	16210535	TT	GC	0 2	0 14	0 4	0 5	0 3	0 6	0 3	0 6	0 4	0 5	0 4	0 7	0 2	0 5	0 1	0 3	0 5	0 10	0 0	0 3	0 2	0 3	0 1	0 4	0 3	0 4	0 0	0 2	0 0	0 0	0 0	0 0	0 4	0 1	0 6	0 11	0 6	0 10	0 7	0 4	0 3	0 3	0 4	0 5	0 1	0 4
18	16210536	T	C	0 2	0 14	0 4	0 5	0 3	0 6	0 3	0 6	0 4	0 5	0 4	0 7	0 2	0 5	0 1	0 3	0 5	0 10	0 0	0 3	0 2	4 3	0 1	0 4	0 3	0 4	0 0	0 2	3 0	0 0	8 0	0 0	0 4	0 1	0 6	0 11	1 6	1 10	0 7	0 4	0 3	1 3	2 4	1 5	0 1	0 4
18	16210545	C	T	0 1	0 6	0 3	0 4	0 2	0 3	0 3	0 5	0 2	0 3	0 5	0 2	0 1	0 3	0 0	0 3	0 2	0 8	0 0	0 2	0 1	0 4	0 1	0 4	0 2	0 4	0 0	0 3	0 2	0 1	0 9	0 0	1 2	0 1	4 0	8 0	3 1	10 1	7 0	4 0	3 0	2 1	4 2	4 1	1 0	4 0
18	16210552	TTA	T	0 0	0 6	0 1	0 1	0 1	0 2	0 1	0 2	0 0	0 1	0 2	0 0	0 1	0 1	0 0	0 3	0 2	0 6	0 0	0 1	0 0	0 0	0 0	0 2	0 2	0 1	0 0	0 2	0 0	0 0	0 0	0 0	0 2	0 0	5 0	7 2	2 1	10 0	5 0	4 0	2 0	2 0	4 0	4 0	1 0	4 0
18	16210554	A	C	0 0	0 6	0 1	0 1	1 1	0 2	1 1	2 2	1 0	0 1	0 2	0 0	0 1	1 1	0 0	0 3	0 2	0 6	0 0	0 1	0 0	1 0	0 0	0 2	0 2	2 1	0 0	0 2	0 0	0 0	10 0	0 0	0 2	0 0	0 0	0 2	1 1	1 0	0 0	0 0	0 0	1 0	2 0	1 0	0 0	0 0
18	16210567	A	G	0 0	0 5	0 1	0 2	0 1	0 3	0 1	0 5	0 2	0 2	0 2	0 0	0 1	0 2	0 0	0 3	0 2	0 5	0 0	0 1	0 0	0 0	0 0	0 2	0 1	0 2	0 0	0 2	0 1	0 0	9 2	0 0	0 1	0 0	0 6	0 10	0 4	0 13	0 5	0 3	0 3	0 3	0 4	0 4	0 1	0 4
18	16210595	A	G	0 0	0 3	0 0	0 1	0 1	0 1	0 0	0 2	0 2	0 1	0 1	0 0	0 1	0 2	0 0	0 1	0 2	0 5	0 1	0 0	0 1	0 0	0 0	0 1	0 0	0 0	0 0	0 1	1 0	0 0	0 11	0 0	0 1	0 0	0 5	0 6	0 1	0 8	0 4	0 3	0 1	0 1	0 1	0 2	0 1	0 3
18	16210597	T	C	0 0	0 3	0 0	0 1	0 1	0 1	0 0	0 2	0 2	0 1	0 1	0 0	0 1	0 2	0 0	0 1	0 2	0 5	0 1	0 0	0 1	0 0	0 0	0 1	0 0	0 0	0 0	0 1	0 0	0 0	0 11	0 0	0 1	0 0	0 5	0 6	0 1	0 8	0 4	0 3	0 1	0 1	0 1	0 2	0 1	0 3
18	16210617	AT	A	0 0	0 2	0 1	0 1	0 1	0 1	0 0	0 1	0 2	0 1	0 1	0 0	0 1	0 2	0 0	0 1	0 1	0 1	0 1	0 0	0 1	0 0	0 0	0 2	0 1	0 0	0 0	0 1	0 2	0 0	0 6	0 0	0 1	0 0	0 2	0 4	1 0	1 3	0 1	0 3	0 1	0 0	0 1	0 2	0 0	0 1
18	16210617	A	AT	0 0	0 2	0 1	0 1	0 1	0 1	0 0	0 1	0 2	0 1	0 1	0 0	0 1	0 2	0 0	0 1	0 1	0 1	0 1	0 0	0 1	1 0	0 0	0 2	0 1	0 0	0 0	0 1	0 2	0 0	0 6	0 0	0 1	0 0	0 2	0 4	0 0	0 3	0 1	0 3	0 1	0 0	0 1	0 2	0 0	0 1
18	16210623	TTTG	T	0 0	0 2	0 1	0 1	0 1	0 1	0 0	0 1	0 2	0 1	0 1	0 0	0 1	0 2	0 0	0 1	0 1	0 1	0 1	0 0	0 1	0 0	0 0	0 2	0 1	0 0	0 0	0 1	0 2	0 0	0 6	0 0	0 1	0 0	0 2	0 4	0 0	1 3	0 1	0 3	0 1	0 0	0 1	0 2	0 0	0 1
18	16210642	A	G	0 0	0 2	0 1	0 0	0 1	0 1	0 0	0 1	0 1	0 1	0 0	0 0	0 0	0 1	0 0	0 1	0 1	0 0	0 1	0 0	0 1	0 1	0 0	0 2	0 1	0 0	0 0	0 0	0 2	0 0	0 5	0 0	0 0	0 0	0 2	0 4	0 0	1 5	0 2	0 2	0 1	0 0	1 1	0 2	0 0	0 1
18	16210649	AT	A	0 0	0 1	0 1	0 0	0 1	0 0	0 0	0 1	0 0	0 0	0 0	0 0	0 0	0 0	0 0	0 0	0 1	0 1	0 1	0 0	0 1	0 0	0 0	0 1	0 1	0 0	0 0	0 0	0 0	0 0	0 2	0 0	0 0	0 0	0 1	0 0	0 0	0 4	0 0	0 0	0 0	0 0	0 1	0 0	0 0	0 1
18	16210652	ATATTT	A	0 0	0 1	0 1	0 0	0 1	0 0	0 0	0 1	0 0	0 0	0 0	0 0	0 0	0 0	0 0	0 0	0 1	0 1	0 1	0 0	0 1	0 0	0 0	0 1	0 1	0 0	0 0	0 0	1 0	0 0	0 2	0 0	0 0	0 0	0 1	0 0	0 0	0 4	0 0	0 0	0 0	0 0	0 1	0 0	0 0	0 1
18	16210654	A	AT	0 0	0 1	0 1	0 0	0 1	0 0	0 0	0 1	0 0	0 0	0 0	0 0	0 0	0 0	0 0	0 0	0 1	0 1	0 1	0 0	0 1	0 0	0 0	0 1	0 1	0 0	0 0	0 0	0 0	0 0	0 2	0 0	0 0	0 0	0 1	3 0	0 0	1 4	1 0	1 0	0 0	0 0	0 1	0 0	0 0	0 1
18	16210668	T	TA	0 0	0 1	0 1	0 0	0 1	0 0	0 0	0 0	0 0	0 0	0 0	0 0	0 0	0 0	0 0	0 0	0 1	0 1	0 0	0 0	0 0	0 1	0 0	0 0	0 1	0 0	0 0	0 0	0 1	0 0	0 0	0 0	0 0	0 0	0 1	0 3	0 0	0 4	0 0	0 2	0 0	0 0	0 0	0 0	0 0	0 0
18	16210682	GT	AA	0 0	0 1	0 1	0 0	0 1	0 0	0 0	0 0	0 0	0 0	0 0	0 0	0 0	0 0	0 0	0 0	0 1	0 1	0 0	0 0	0 0	0 1	0 0	0 0	0 1	0 0	0 0	0 0	0 1	0 0	0 0	0 0	0 0	0 0	0 1	0 3	0 0	0 4	0 0	0 2	0 0	0 0	0 0	0 0	0 0	0 0
18	16210690	AGTC	GGTA	0 0	0 0	0 1	0 0	0 1	0 0	0 0	0 0	0 0	0 0	0 0	0 0	0 0	0 0	0 0	0 0	0 0	0 1	0 0	0 0	0 0	0 1	0 0	0 1	0 2	0 1	0 0	0 0	0 1	0 1	0 0	0 0	0 0	0 0	1 0	3 0	0 0	3 1	0 1	1 0	0 0	0 0	0 0	0 1	0 0	0 0
18	16210693	C	T	0 0	0 0	0 1	0 0	0 1	0 0	0 0	0 0	0 0	0 0	0 0	0 0	0 0	0 0	0 0	0 0	0 0	0 1	0 0	0 0	0 0	0 1	0 0	0 1	0 2	0 1	0 0	0 0	0 1	0 1	0 0	0 0	0 0	0 0	0 0	0 0	0 0	0 1	0 1	0 0	0 0	0 0	0 0	0 1	0 0	0 0
18	16210703	GTGTTGATC	G	0 0	0 0	0 0	0 0	0 0	0 0	0 0	0 0	0 0	0 0	0 0	0 0	0 0	0 0	0 0	0 0	0 0	0 1	0 0	0 0	0 0	0 0	0 0	0 0	0 2	0 1	0 0	0 0	0 0	0 3	0 0	0 0	0 0	0 1	0 0	0 0	0 0	0 0	0 2	0 0	0 0	0 0	0 0	0 1	0 0	0 0
18	16210705	G	A	0 0	0 0	0 0	0 0	0 0	0 0	0 0	0 0	0 0	0 0	0 0	0 0	0 0	0 0	0 0	0 0	0 0	0 1	0 0	0 0	0 0	0 0	0 0	0 0	0 2	0 1	0 0	0 0	0 0	0 3	0 0	0 0	0 0	0 1	0 0	0 0	0 0	0 0	0 2	0 0	0 0	0 0	0 0	0 1	0 0	0 0
18	16210718	C	A	0 0	0 0	0 0	0 0	0 0	0 0	0 0	0 0	0 0	0 0	0 0	0 0	0 0	0 0	0 0	0 0	0 0	0 1	0 0	0 0	0 0	0 0	0 0	0 1	0 1	0 1	0 0	0 0	0 0	4 0	0 0	0 0	0 0	0 1	0 0	1 1	0 1	1 0	0 2	0 0	0 0	0 0	0 0	1 0	0 1	0 0
18	16210737	C	T	0 0	0 0	0 0	0 0	0 0	0 0	0 0	0 0	0 0	0 0	0 0	0 0	0 0	0 0	0 0	0 0	0 0	0 1	0 0	0 0	0 0	0 0	0 0	0 1	0 1	0 1	0 0	0 0	0 0	4 0	0 0	0 0	0 0	1 0	0 0	1 0	2 0	0 0	0 0	0 0	1 0	1 0	0 0	0 0	1 0	0 0
18	16210737	CAAT	TAAA	0 0	0 0	0 0	0 0	0 0	0 0	0 0	0 0	0 0	0 0	0 0	0 0	0 0	0 0	0 0	0 0	0 0	0 1	0 0	0 0	0 0	0 0	0 0	0 1	0 1	0 1	0 0	0 0	0 0	0 0	0 0	0 0	0 0	0 0	0 0	0 0	0 0	0 0	0 0	0 0	0 0	0 0	0 0	0 0	0 0	0 0
18	16210743	TA	T	0 0	0 0	0 0	0 0	0 0	0 0	0 0	0 0	0 0	0 0	0 0	0 0	0 0	0 0	0 0	0 0	0 0	0 0	0 0	0 0	0 0	0 0	0 0	0 1	0 1	0 1	0 0	0 0	0 0	0 0	0 0	0 0	0 0	1 0	1 0	1 0	2 0	0 0	0 0	0 0	1 0	1 0	0 0	0 0	1 0	0 0
18	16210745	A	T	0 0	0 0	0 0	0 0	0 0	0 0	0 0	0 0	0 0	0 0	0 0	0 0	0 0	0 0	0 0	0 0	0 0	0 0	0 0	0 0	0 0	0 0	0 0	0 1	0 1	0 1	0 0	0 0	0 0	4 0	0 0	0 0	0 0	0 0	0 0	0 0	0 0	0 0	0 0	0 0	0 0	0 0	0 0	0 0	0 0	0 0
18	16210751	T	G	0 0	0 0	0 1	0 0	0 0	0 0	0 0	0 0	0 0	0 0	0 0	0 0	0 0	0 0	0 0	0 0	0 0	0 0	0 0	0 0	0 0	0 0	0 0	0 1	0 1	0 1	0 0	0 0	0 0	0 4	0 0	0 0	0 0	0 1	0 3	0 3	0 2	0 0	0 1	0 0	0 2	0 1	0 2	0 1	0 1	0 0
18	16210757	A	T	0 0	0 0	0 1	0 0	0 0	0 0	0 0	0 0	0 0	0 0	0 0	0 0	0 0	0 0	0 0	0 0	0 0	0 0	0 0	0 0	0 0	0 0	0 0	0 1	0 1	0 1	0 0	0 0	0 0	0 4	0 0	0 0	0 0	0 2	0 4	0 3	0 4	0 0	0 2	0 0	0 2	0 1	0 2	0 2	0 1	0 0
18	16210773	C	A	0 0	0 0	0 2	0 0	0 0	0 0	0 0	0 0	0 0	0 0	0 0	0 0	0 0	0 0	0 0	0 2	0 0	0 0	0 0	0 0	0 0	0 0	0 0	0 1	0 1	0 0	0 0	0 0	0 0	0 3	0 0	0 0	0 0	2 0	1 4	1 3	3 1	0 0	0 4	0 1	3 1	1 0	2 3	0 2	1 1	0 0
18	16210797	G	T	0 0	0 0	0 2	0 2	0 0	0 0	0 0	0 0	0 0	0 0	0 1	0 0	0 0	0 0	0 0	0 3	0 0	0 0	0 0	0 0	0 0	0 0	0 0	0 1	0 0	0 0	0 0	0 0	0 2	3 0	0 0	1 0	0 0	0 2	0 6	0 4	0 5	0 1	0 5	0 1	0 5	0 2	0 6	0 3	0 3	0 3
18	16210829	T	C	0 0	0 1	0 2	0 2	0 0	0 0	0 0	0 0	0 0	0 0	0 1	0 0	0 0	0 0	0 0	0 4	0 0	0 0	0 0	0 0	0 0	0 0	0 0	0 1	0 0	0 0	0 0	0 0	0 3	0 2	0 2	0 1	0 0	0 2	7 4	5 3	3 6	3 0	4 5	2 0	2 4	2 1	3 3	2 5	0 7	4 1
18	16210832	T	A	0 0	0 1	0 2	0 2	0 0	0 0	0 0	0 0	0 0	0 0	0 1	0 0	0 0	0 0	0 0	0 4	0 0	0 0	0 0	0 0	0 0	0 0	0 0	0 1	0 0	0 1	0 0	0 0	0 3	0 2	0 2	0 1	0 0	2 0	4 8	1 6	3 6	0 3	2 7	0 2	5 2	1 2	3 5	4 4	5 2	1 4
18	16210846	A	C	0 0	0 1	0 2	0 2	0 0	0 0	0 0	0 0	0 0	0 0	0 1	0 1	0 0	0 0	0 0	0 5	0 0	0 0	0 0	0 0	0 0	0 0	0 1	0 1	0 0	0 3	0 0	0 0	0 4	0 2	0 6	0 1	0 0	2 0	3 10	3 6	3 7	0 3	2 7	0 3	4 4	1 1	5 4	4 4	5 1	1 3
18	16210851	A	G	0 0	0 1	0 1	0 2	0 1	0 0	0 0	0 0	0 0	0 0	0 1	0 1	0 0	0 0	0 0	0 5	0 0	0 0	0 0	0 0	0 0	0 1	0 1	0 2	0 3	0 3	0 0	0 0	0 4	0 2	0 6	0 1	0 0	0 3	10 5	5 4	4 3	3 0	4 4	3 0	5 5	3 1	3 6	1 6	2 8	6 1
18	16210858	G	A	0 0	0 2	0 2	0 2	0 1	0 0	0 0	0 0	0 0	0 0	0 1	0 3	0 0	0 1	0 0	0 5	0 0	0 1	0 0	0 0	0 1	0 1	0 2	0 3	0 3	0 3	0 0	0 0	0 5	0 2	0 6	0 1	0 0	2 0	6 11	3 5	4 4	0 4	3 6	0 3	5 5	1 3	6 5	5 2	3 7	1 6
18	16210869	A	T	0 0	0 2	0 3	0 2	0 1	0 0	0 0	0 1	0 0	0 0	0 1	0 3	0 1	0 2	0 0	0 5	0 0	0 1	0 0	0 0	0 2	0 1	0 2	0 4	0 4	0 4	0 0	0 0	0 4	0 2	0 9	0 1	0 0	2 0	6 12	2 7	3 3	2 3	4 9	0 4	6 5	3 3	8 5	5 4	6 4	2 6
18	16210897	G	A	0 0	0 7	0 3	0 0	0 4	0 2	0 0	0 2	0 0	0 4	0 4	0 6	0 2	0 2	0 1	0 3	0 0	0 2	0 0	0 0	0 4	0 3	0 3	0 4	0 5	0 7	0 0	0 0	0 4	0 0	7 4	0 1	0 2	0 5	0 18	0 11	0 8	0 9	0 17	0 6	0 14	0 6	0 17	0 9	0 10	0 8
18	16210899	G	A	0 1	0 7	0 3	0 0	0 4	0 2	0 0	0 2	0 0	0 4	0 4	0 6	0 2	0 2	0 1	0 3	0 0	0 3	0 0	0 0	0 4	0 3	0 4	0 3	0 5	0 7	0 0	0 0	0 4	0 0	0 10	1 0	0 2	0 5	12 7	7 5	5 3	4 4	9 8	4 2	7 9	4 2	7 11	2 8	3 7	8 3
18	16210900	C	T	0 1	0 7	0 3	0 0	0 4	0 2	0 0	0 2	0 0	0 4	0 4	0 6	0 2	0 2	0 1	0 2	0 1	0 3	0 0	0 0	0 4	0 3	0 4	0 3	0 5	0 7	0 0	0 0	1 2	0 0	0 10	0 2	0 2	1 3	0 19	0 14	0 9	1 8	0 18	0 7	0 17	0 7	0 18	0 9	0 12	0 11
18	16210911	T	C	0 1	0 8	0 5	0 2	0 7	0 3	0 0	0 4	0 0	0 7	0 5	0 8	0 2	0 5	0 1	0 3	0 1	0 4	0 2	0 0	0 5	0 3	0 4	0 3	0 5	0 11	0 0	0 0	0 5	0 0	0 12	0 2	0 2	0 7	0 21	0 15	0 9	0 12	0 20	0 6	0 22	0 7	0 17	0 11	0 12	0 13
18	16210914	T	G	0 1	0 8	0 5	0 3	0 8	0 4	0 0	0 4	0 0	0 7	0 5	0 9	0 3	0 6	0 2	0 3	0 1	0 5	0 2	0 0	0 5	0 3	0 4	0 3	0 5	0 12	0 1	0 0	0 5	0 0	0 14	0 2	0 2	0 7	11 10	9 7	6 3	7 6	13 14	4 3	11 12	4 2	8 9	5 8	1 11	10 3
18	16210918	T	C	0 1	0 8	0 5	0 3	0 9	0 4	0 0	0 4	0 0	0 7	0 5	0 9	0 3	0 7	0 2	0 2	0 1	0 6	0 1	0 0	0 6	0 3	0 4	0 3	0 5	0 13	0 0	0 0	3 2	0 0	10 4	0 0	0 2	7 0	10 13	5 10	3 6	5 7	13 12	3 4	11 11	2 5	9 8	7 5	8 3	3 10
18	16210918	T	G	0 1	0 8	0 5	0 3	0 9	0 4	0 0	0 4	0 0	0 7	0 5	0 9	0 3	0 7	0 2	0 2	0 1	0 6	0 1	0 0	0 6	0 3	0 4	0 3	0 5	0 13	0 0	0 0	0 2	0 0	0 4	2 0	0 2	0 0	0 13	0 10	0 6	0 7	0 12	0 4	0 11	0 5	0 8	0 5	0 3	0 10
18	16210932	AAAAAACTGTTATTACTATGAAAAAAAT	TAAAAACTGTTATTATTATGAAAAAAAC	0 2	0 6	0 5	0 4	0 1	0 6	0 1	0 2	0 0	0 9	0 8	0 8	0 3	0 2	0 2	0 4	0 2	0 6	0 2	0 0	0 6	0 1	0 3	0 3	0 3	0 6	0 0	0 1	0 0	0 0	0 0	0 0	0 3	0 0	11 0	10 0	2 0	3 0	9 0	3 0	12 0	3 0	7 0	4 0	2 0	8 0
18	16210967	G	A	0 8	0 10	0 7	0 4	0 17	0 13	0 5	0 10	0 9	0 27	0 16	0 15	0 12	0 14	0 5	0 7	0 7	0 10	0 9	0 7	0 11	0 4	0 6	0 5	0 3	0 16	0 6	0 4	0 5	0 1	0 10	0 0	0 15	0 9	6 19	7 10	4 8	0 16	9 20	6 10	0 29	0 7	0 23	0 14	1 17	0 14
18	16210968	G	A	0 8	0 10	0 7	0 4	0 17	0 13	0 5	0 10	0 9	0 27	0 16	0 15	0 12	0 14	0 5	0 7	0 7	0 10	0 9	0 7	0 11	0 4	0 6	0 5	0 3	0 16	0 6	0 4	1 5	0 1	0 10	3 0	0 15	0 9	0 19	1 10	0 8	3 16	0 20	0 10	0 29	0 7	2 23	0 14	0 17	1 14
18	16210973	G	A	0 9	0 10	0 7	0 6	0 4	0 14	0 3	0 9	0 10	0 27	0 16	0 19	0 13	0 16	0 4	0 7	0 7	0 10	3 6	5 4	0 11	0 4	0 9	0 5	0 4	0 15	2 5	0 6	1 2	0 1	0 8	0 3	0 16	1 10	0 18	0 13	0 12	0 17	0 17	0 15	0 28	0 7	0 26	0 14	0 14	0 15
18	16210976	G	A	0 9	0 10	0 7	0 6	11 4	0 14	2 3	0 9	0 10	0 27	1 16	0 19	0 13	0 16	0 4	0 7	0 7	0 10	0 6	0 4	0 11	0 4	0 9	0 5	0 4	0 15	0 5	0 6	0 2	0 1	0 8	0 3	0 16	0 10	10 18	8 13	3 12	0 17	8 17	1 15	0 28	0 7	0 26	0 14	0 14	0 15
18	16210976	G	T	0 9	0 10	0 7	0 6	0 4	0 14	0 3	0 9	0 10	0 27	0 16	0 19	0 13	0 16	0 4	0 7	0 7	0 10	0 6	0 4	0 11	0 4	0 9	0 5	0 4	0 15	0 5	0 6	0 2	0 1	0 8	0 3	0 16	0 10	0 18	0 13	0 12	0 17	0 17	0 15	0 28	0 7	0 26	0 14	0 14	0 15
18	16210977	C	T	0 9	0 10	0 7	0 6	0 4	0 14	0 3	0 9	0 10	0 27	0 16	0 19	0 13	0 16	0 4	0 7	0 7	0 10	0 6	0 4	0 11	0 4	0 9	0 5	0 4	0 15	0 5	0 6	0 2	0 1	0 8	0 3	0 16	0 10	0 18	0 13	0 12	0 17	1 17	0 15	0 28	0 7	0 26	0 14	0 14	0 15
18	16210978	G	A	0 9	0 10	0 7	0 6	0 4	0 14	0 3	0 9	0 10	0 27	0 16	0 19	0 13	0 16	0 4	0 7	0 7	0 10	0 6	0 4	0 11	3 4	0 9	0 5	0 4	0 15	0 5	0 6	0 2	0 1	0 8	0 3	0 16	0 10	0 18	0 13	0 12	0 17	1 17	0 15	0 28	0 7	0 26	0 14	0 14	0 15
18	16210982	G	T	0 10	0 10	0 10	0 7	0 16	0 14	0 5	0 10	0 10	0 28	0 19	0 19	0 14	0 18	0 5	0 7	0 8	0 11	0 9	0 8	0 11	0 9	0 10	0 7	0 5	0 15	0 8	0 8	0 5	0 0	0 8	0 3	0 17	0 12	0 26	0 23	0 15	0 22	0 34	0 22	0 32	0 6	0 28	0 18	0 18	0 16
18	16210989	CTCCTGAGAGCGGACAG	ATCCTGAGGGCGGACAA	0 7	0 5	0 3	0 2	0 4	0 6	0 2	0 3	0 3	0 8	0 5	0 3	0 12	0 3	0 3	0 5	0 4	0 5	0 4	0 0	0 2	0 5	0 7	0 5	0 4	0 2	0 3	0 4	0 0	0 0	0 0	0 0	0 9	8 0	8 0	3 0	6 0	0 0	8 0	15 0	14 0	0 0	9 0	8 0	3 0	6 0
18	16211022	C	A	0 7	0 7	0 8	0 4	0 11	0 12	0 3	0 8	0 9	0 20	0 12	0 8	0 14	0 18	0 4	0 6	0 10	0 8	0 7	0 8	0 11	0 12	0 7	0 5	0 5	0 11	0 9	0 8	0 3	0 0	0 3	0 0	0 19	10 3	3 23	0 12	0 15	6 16	6 26	8 15	17 12	0 3	13 13	13 9	5 15	4 11
18	16211023	A	G	0 7	0 7	0 8	0 4	0 11	0 12	0 3	0 8	0 9	0 20	0 12	0 8	0 14	0 18	0 4	0 6	0 10	0 8	0 7	0 8	0 11	0 12	0 7	0 5	0 5	0 11	0 9	0 8	0 3	0 0	0 3	0 0	0 19	1 3	0 23	8 12	4 15	0 16	0 26	0 15	0 12	0 3	0 13	0 9	0 15	0 11
18	16211028	G	A	0 6	0 7	0 7	0 4	0 11	0 11	0 3	0 8	0 7	0 18	0 11	0 6	0 14	0 18	0 5	0 7	0 11	0 8	0 8	0 7	0 10	0 12	0 7	0 7	0 5	0 11	0 8	0 8	0 1	0 0	0 3	0 2	0 17	0 14	0 24	0 19	0 20	0 22	0 32	0 23	0 28	0 5	0 27	0 21	0 20	0 15
18	16211033	CTTCCTCTTGGCTGCAGTT	TTTCCTCTTAGCTGCAGTC	0 2	0 4	0 6	0 4	0 5	0 9	0 1	0 4	0 4	0 13	0 7	0 3	0 6	0 12	0 4	0 5	0 4	0 2	0 2	0 2	0 7	0 8	0 0	0 0	0 0	0 6	0 2	0 2	0 0	0 0	0 0	0 0	0 3	0 0	0 0	0 0	0 0	0 0	0 0	0 0	0 0	0 0	0 0	0 0	0 0	0 0
18	16211039	CTTGGCTGCAGTT	TTTGACTACAGTC	0 2	0 4	0 6	0 4	0 5	0 9	0 1	0 4	0 4	0 13	0 7	0 3	0 6	0 12	0 4	0 5	0 4	0 2	0 2	0 2	0 7	0 8	0 0	0 0	0 0	0 6	0 2	0 2	0 0	0 0	0 0	0 0	0 3	3 0	8 0	5 0	6 0	10 0	14 0	3 0	7 0	4 0	10 0	4 0	5 0	6 0
18	16211039	CTTGGCTGCAGTT	TTTGACTATAGTC	0 2	0 4	0 6	0 4	0 5	0 9	0 1	0 4	0 4	0 13	0 7	0 3	0 6	0 12	0 4	0 5	0 4	0 2	0 2	0 2	0 7	0 8	0 0	0 0	0 0	0 6	0 2	0 2	0 0	0 0	0 0	0 0	0 3	0 0	0 0	0 0	0 0	0 0	0 0	0 0	0 0	0 0	0 0	0 0	0 0	0 0
18	16211041	TG	GC	0 2	0 4	0 6	0 4	0 5	0 9	0 1	0 4	0 4	0 13	0 7	0 3	0 6	0 12	0 4	0 5	0 4	0 2	0 2	0 2	0 7	0 8	0 0	0 0	0 0	0 6	0 2	0 2	0 0	0 0	0 0	0 0	0 3	0 0	0 0	0 0	0 0	0 0	0 0	0 0	0 0	0 0	0 0	0 0	0 0	0 0
18	16211043	GCTGCAGTT	ACTGCAGTC	0 2	0 4	0 6	0 4	0 5	0 9	0 1	0 4	0 4	0 13	0 7	0 3	0 6	0 12	0 4	0 5	0 4	0 2	0 2	0 2	0 7	0 8	0 0	0 0	0 0	0 6	0 2	0 2	0 0	0 0	0 0	0 0	0 3	0 0	0 0	0 0	0 0	0 0	0 0	0 0	0 0	0 0	0 0	0 0	0 0	0 0
18	16211044	C	T	0 2	0 4	0 6	0 4	0 5	0 9	0 1	0 4	0 4	0 13	0 7	0 3	0 6	0 12	0 4	0 5	4 4	2 2	0 2	0 2	0 7	0 8	2 0	1 0	3 0	0 6	0 2	0 2	0 0	0 0	0 0	0 0	0 3	0 0	0 0	0 0	0 0	0 0	0 0	0 0	0 0	0 0	0 0	0 0	0 0	0 0
18	16211047	CAGTT	AGTC	0 2	0 4	0 6	0 4	0 5	0 9	0 1	0 4	0 4	0 13	0 7	0 3	0 6	0 12	0 4	0 5	0 4	0 2	0 2	0 2	0 7	0 8	0 0	0 0	0 0	0 6	0 2	0 2	0 0	0 0	0 0	0 0	0 3	8 0	3 0	0 0	0 0	0 0	5 0	8 0	12 0	0 0	13 0	10 0	5 0	5 0
18	16211047	C	T	0 2	0 4	0 6	0 4	0 5	0 9	0 1	0 4	0 4	0 13	0 7	0 3	0 6	0 12	0 4	0 5	0 4	0 2	0 2	0 2	0 7	0 8	4 0	5 0	3 0	2 6	0 2	1 2	0 0	0 0	0 0	0 0	0 3	0 0	0 0	0 0	0 0	0 0	0 0	0 0	0 0	0 0	0 0	0 0	0 0	0 0
18	16211049	GTT	ATC	0 2	0 4	0 6	0 4	0 5	0 9	0 1	0 4	0 4	0 13	0 7	0 3	0 6	0 12	0 4	0 5	0 4	0 2	0 2	0 2	0 7	0 8	0 0	0 0	0 0	0 6	0 2	0 2	0 0	0 0	0 0	2 0	0 3	0 0	0 0	13 0	10 0	0 0	0 0	2 0	0 0	0 0	0 0	0 0	0 0	0 0
18	16211051	T	C	0 2	0 4	0 6	0 4	0 5	0 9	0 1	0 4	0 4	0 13	0 7	0 3	0 6	0 12	0 4	0 5	0 4	0 2	0 2	0 2	0 7	0 8	0 0	0 0	0 0	0 6	0 2	0 2	0 0	0 0	0 0	0 0	5 3	1 0	6 0	0 0	0 0	0 0	8 0	8 0	1 0	0 0	0 0	1 0	7 0	0 0
18	16211056	CGCCAC	TGTCAG	0 1	0 5	0 8	0 4	0 4	0 7	0 1	0 1	0 2	0 7	0 5	0 1	0 6	0 13	0 2	0 6	0 6	0 3	0 4	0 2	0 5	0 7	0 5	0 5	0 6	0 6	0 2	0 5	0 0	0 0	0 0	0 0	0 7	0 3	0 13	0 19	0 16	0 14	0 18	0 11	0 6	0 4	0 7	0 4	0 13	0 9
18	16211057	GC	AT	0 1	0 5	0 8	0 4	0 4	0 7	0 1	0 1	0 2	0 7	0 5	0 1	0 6	0 13	0 2	0 6	0 6	0 3	0 4	0 2	0 5	0 7	0 5	0 5	0 6	0 6	0 2	0 5	0 0	2 0	0 0	3 0	0 7	0 3	0 13	0 19	0 16	0 14	0 18	0 11	0 6	0 4	0 7	0 4	0 13	0 9
18	16211059	CAC	TAT	0 1	0 5	0 8	0 4	0 4	0 7	0 1	0 1	0 2	0 7	0 5	0 1	0 6	0 13	0 2	0 6	0 6	0 3	0 4	0 2	0 5	0 7	0 5	0 5	0 6	0 6	0 2	0 5	0 0	0 0	0 0	0 0	0 7	0 3	0 13	0 19	0 16	0 14	0 18	0 11	0 6	0 4	0 7	0 4	0 13	0 9
18	16211061	C	T	0 1	0 5	0 8	0 4	0 4	0 7	0 1	0 1	0 2	0 7	0 5	0 1	0 6	0 13	0 2	0 6	0 6	0 3	0 4	0 2	0 5	0 7	0 5	0 5	0 6	0 6	0 2	0 5	0 0	0 0	0 0	0 0	0 7	9 3	2 13	0 19	0 16	5 14	4 18	10 11	12 6	0 4	13 7	11 4	5 13	3 9
18	16211066	T	C	0 1	0 4	0 7	0 3	0 3	0 6	0 1	0 1	0 1	0 5	0 4	0 0	0 6	0 13	0 4	0 6	0 6	0 3	0 3	0 1	0 5	0 7	0 4	0 5	0 5	0 7	0 2	0 4	0 1	0 2	0 0	0 4	0 6	2 14	0 17	0 13	0 15	0 19	0 26	0 21	0 18	0 4	0 20	1 15	0 17	0 14
18	16211074	C	T	0 1	0 3	0 5	0 3	0 4	0 8	0 1	0 1	0 1	0 6	0 1	0 0	0 6	0 10	0 3	0 6	0 6	0 3	0 5	0 1	0 6	0 6	0 5	0 5	0 6	0 7	0 1	0 4	0 1	0 2	0 0	0 4	0 4	0 15	0 17	0 15	0 14	0 18	0 23	0 22	0 15	0 4	0 20	0 14	0 13	0 15
18	16211077	GGA	AGG	0 1	0 2	0 5	0 3	0 2	0 5	0 0	0 0	0 1	0 5	0 1	0 0	0 5	0 2	0 3	0 6	0 5	0 3	0 3	0 0	0 6	0 1	0 5	0 4	0 4	0 1	0 0	0 3	0 0	0 0	0 0	0 0	0 0	0 2	0 0	11 0	9 0	0 0	0 0	2 0	0 0	0 0	0 0	0 0	0 0	0 0
18	16211078	GA	AG	0 1	0 2	0 5	0 3	0 2	0 5	0 0	0 0	0 1	0 5	0 1	0 0	0 5	0 2	0 3	0 6	0 5	0 3	0 3	0 0	0 6	0 1	0 5	0 4	0 4	0 1	0 0	0 3	0 0	0 0	0 0	0 0	0 0	11 2	2 0	0 0	0 0	4 0	5 0	11 0	10 0	0 0	13 0	11 0	5 0	6 0
18	16211079	A	G	0 1	0 2	0 5	0 3	1 2	0 5	1 0	0 0	0 1	0 5	0 1	0 0	0 5	5 2	0 3	0 6	0 5	0 3	3 3	1 0	0 6	2 1	0 5	0 4	0 4	7 1	0 0	0 3	0 0	2 0	0 0	4 0	3 0	3 2	14 0	3 0	6 0	14 0	17 0	8 0	4 0	4 0	5 0	3 0	7 0	8 0
18	16211085	A	G	0 1	0 1	0 5	0 4	0 2	0 6	0 0	0 0	0 1	0 6	0 1	0 1	0 5	0 9	0 3	0 6	0 5	0 3	0 6	0 1	0 6	0 3	0 5	0 4	0 4	0 8	0 1	0 3	0 0	0 2	0 0	0 4	0 2	0 17	5 11	0 17	0 14	0 21	0 16	5 16	0 15	0 5	0 19	0 14	0 12	0 15
18	16211085	AC	GT	0 1	0 1	0 5	0 4	0 2	0 6	0 0	0 0	0 1	0 6	0 1	0 1	0 5	0 9	0 3	0 6	0 5	0 3	0 6	0 1	0 6	0 3	0 5	0 4	0 4	0 8	0 1	0 3	0 0	0 2	0 0	0 4	0 2	0 17	0 11	0 17	0 14	0 21	9 16	0 16	0 15	0 5	0 19	0 14	0 12	0 15
18	16211086	C	T	0 1	0 1	0 5	0 4	1 2	0 6	1 0	0 0	0 1	0 6	0 1	0 1	0 5	0 9	0 3	0 6	0 5	0 3	0 6	0 1	0 6	0 3	0 5	0 4	0 4	0 8	0 1	0 3	0 0	0 2	1 0	0 4	0 2	0 17	0 11	0 17	0 14	0 21	0 16	0 16	0 15	0 5	0 19	0 14	0 12	0 15
18	16211088	G	A	0 1	0 1	0 5	0 4	0 3	0 6	0 1	0 0	0 0	0 6	0 1	0 1	0 6	0 9	0 3	0 6	0 5	0 2	0 6	0 1	0 7	0 2	0 5	0 4	0 5	0 8	0 1	0 3	0 0	0 0	0 1	0 0	0 1	0 19	0 16	4 14	3 11	0 20	0 24	0 21	0 17	0 4	0 18	0 15	0 12	0 16
18	16211088	G	T	0 1	0 1	0 5	0 4	0 3	0 6	0 1	0 0	0 0	0 6	0 1	0 1	0 6	0 9	0 3	0 6	0 5	0 2	0 6	0 1	0 7	0 2	0 5	0 4	0 5	0 8	0 1	0 3	0 0	2 0	0 1	4 0	0 1	0 19	0 16	0 14	0 11	0 20	0 24	0 21	0 17	0 4	0 18	0 15	0 12	0 16
18	16211091	ATAGC	CTGGG	0 1	0 1	0 4	0 3	0 2	0 6	0 1	0 0	0 0	0 4	0 1	0 1	0 6	0 9	0 3	0 5	0 4	0 1	0 6	0 1	0 7	0 0	0 5	0 3	0 5	0 8	0 1	0 2	0 0	0 0	0 1	0 0	0 0	8 0	6 0	12 0	8 0	6 0	14 0	15 0	8 0	0 0	10 0	9 0	8 0	5 0
18	16211093	A	G	0 1	0 1	0 4	0 3	0 2	0 6	0 1	0 0	0 0	0 4	0 1	0 1	0 6	0 9	0 3	0 5	0 4	0 1	0 6	0 1	0 7	0 0	0 5	0 3	0 5	0 8	0 1	0 2	0 0	2 0	0 1	4 0	0 0	7 0	5 0	5 0	4 0	14 0	8 0	5 0	6 0	2 0	4 0	4 0	3 0	8 0
18	16211102	C	T	0 1	0 1	0 4	0 2	0 2	0 6	0 1	0 0	0 0	0 4	0 1	0 1	0 5	0 4	0 3	0 3	0 3	0 1	0 5	0 0	0 6	0 0	0 5	0 3	0 5	0 9	0 1	0 2	0 0	0 2	0 1	0 4	0 0	0 13	0 10	0 18	0 15	0 22	0 27	0 22	0 12	0 3	0 18	0 12	0 12	0 14
18	16211110	G	A	0 1	0 1	0 3	0 1	0 4	0 5	0 1	0 0	0 0	0 6	0 1	0 1	0 6	0 4	0 3	0 5	0 2	0 1	0 5	0 0	0 6	0 0	0 5	0 3	0 5	0 10	0 1	0 1	0 0	0 3	0 1	0 5	0 0	0 19	0 13	0 18	0 15	0 22	0 30	0 26	0 15	0 6	0 24	0 14	0 14	0 16
18	16211111	G	A	0 1	0 1	0 3	0 1	0 4	0 5	0 1	0 0	0 0	0 6	0 1	0 1	0 6	0 4	0 2	0 5	0 2	0 1	0 5	0 0	0 6	0 0	0 5	0 3	0 5	0 10	0 1	0 2	0 0	0 3	0 1	0 5	0 0	0 20	2 10	10 10	8 6	0 22	10 19	5 23	0 16	0 9	0 24	0 15	0 13	0 17
18	16211114	C	T	0 0	0 1	0 3	0 1	0 4	0 5	0 0	0 0	0 0	0 7	0 1	0 1	0 4	0 4	0 1	0 4	0 2	0 1	0 4	0 0	0 3	0 0	0 4	0 2	0 5	0 9	0 1	0 1	0 0	0 3	0 1	0 5	0 0	4 10	2 7	0 19	0 13	0 14	0 23	2 18	1 9	1 1	0 20	1 10	0 7	0 12
18	16211116	G	A	0 0	0 1	0 3	0 1	0 4	0 5	0 0	0 0	0 0	0 7	0 1	0 1	0 4	0 4	0 1	0 4	0 2	0 1	0 4	0 0	0 3	0 0	0 4	0 2	0 5	0 9	0 1	0 1	0 0	0 3	0 1	0 5	0 0	4 10	4 7	0 19	0 13	3 14	4 23	4 18	5 9	4 1	5 20	4 10	4 7	5 12
18	16211126	G	A	0 0	0 1	0 3	0 1	0 3	0 5	0 0	0 1	0 0	0 7	0 1	0 3	0 4	0 4	0 2	0 4	0 0	0 2	0 3	0 0	0 3	0 1	0 4	0 2	0 5	0 9	0 1	0 0	0 0	0 3	0 1	0 5	0 0	0 13	0 5	0 7	0 7	0 5	0 17	0 15	0 10	0 1	0 16	0 10	0 5	0 5
18	16211128	C	T	0 0	0 1	0 3	0 1	0 3	0 5	0 0	0 1	0 0	0 7	0 1	0 3	0 4	0 4	0 2	0 4	0 0	0 2	0 3	0 0	0 3	0 1	0 4	0 2	0 5	0 9	0 1	0 0	0 0	0 3	0 1	0 5	0 0	5 13	5 5	5 7	6 7	14 5	11 17	8 15	6 10	6 1	4 16	4 10	6 5	9 5
18	16211129	C	A	0 0	0 1	0 3	0 1	0 3	0 5	0 0	0 1	0 0	0 7	0 1	0 3	0 4	0 4	0 2	0 4	0 0	0 2	0 3	0 0	0 3	0 1	0 4	0 2	0 5	0 9	0 1	0 0	0 0	0 3	0 1	0 5	0 1	0 16	0 12	0 18	0 11	1 20	0 31	0 23	0 18	0 7	1 17	0 15	0 10	0 16
18	16211130	A	C	0 0	0 1	0 3	0 1	0 3	0 5	0 0	0 1	0 0	0 7	0 1	0 3	0 4	0 4	0 2	0 4	0 0	0 2	0 3	0 1	0 4	0 1	0 4	0 2	0 4	0 8	0 1	0 0	0 0	0 3	0 1	0 5	0 1	6 12	4 8	0 18	0 13	0 22	2 31	3 18	3 14	1 9	1 18	1 15	0 11	1 16
18	16211137	G	A	0 0	0 0	0 4	0 1	0 4	0 5	0 0	0 1	0 0	0 6	0 2	0 3	0 3	0 5	0 2	0 4	0 0	0 2	0 3	0 1	0 3	0 1	0 5	0 2	0 4	0 9	0 1	0 0	0 0	0 2	0 1	0 5	0 1	6 10	2 9	6 10	11 2	13 5	14 16	11 10	6 9	1 8	13 5	9 7	4 7	5 13
18	16211142	G	A	0 0	0 0	0 3	0 1	0 4	0 5	0 0	0 1	0 0	0 6	0 1	0 5	0 3	0 5	0 2	0 4	0 0	0 2	0 3	0 1	0 4	0 1	0 4	0 2	0 4	0 9	0 1	0 0	0 0	0 2	0 2	0 5	0 1	0 16	0 12	0 18	0 15	0 18	0 32	0 25	0 17	0 9	0 20	0 16	1 9	0 18
18	16211144	GTCATGGC	ATCATGGT	0 0	0 0	0 1	0 1	0 3	0 3	0 0	0 0	0 0	0 5	0 1	0 4	0 3	0 2	0 1	0 0	0 0	0 0	0 2	0 0	0 1	0 1	0 0	0 0	0 0	0 0	0 0	0 0	0 0	0 0	0 0	0 0	0 0	0 0	0 0	0 0	0 0	0 0	0 0	0 0	0 0	0 0	0 0	0 0	0 0	0 0
[truncated: 19,962 more rows]
[truncated: 40 more columns]
