# Supplementary material for: Genome Assembly and Sex-Determining Region of Male and Female Populus × sibirica
Source: Front Plant Sci. 2021 Sep 8;12:625416. doi: 10.3389/fpls.2021.625416 (PMC8455832; doi:10.3389/fpls.2021.625416)
Supplement: Supplementary Data 11 — Genetic polymorphisms of P. × sibirica, P. nigra, P. deltoides, P. trichocarpa, P. balsamifera, P. simonii, P. cathayana, P. koreana males based on Illumina WGS data aligned to the male P. × sibirica genome assembly with a further search for polymorphisms in the Y SDR haplotype. The numbers located one below the other indicate the number of reads with the reference (bottom) and alternative (top) alleles. [file Data_Sheet_11.XLSX]

## Sheet: SNP table
Supplementary Data 11. Genetic polymorphisms of P. × sibirica, P. nigra, P. deltoides, P. trichocarpa, P. balsamifera, P. simonii, P. cathayana, P. koreana males based on Illumina WGS data aligned to the male P. × sibirica genome assembly with a further search for polymorphisms in the Y SDR haplotype.
The numbers located one below the other indicate the number of reads with the reference (bottom) and alternative (top) alleles.
Contig	Nucleotide position	Reference allele	Alternative allele	P.trichocarpa - SRR1821244	P.trichocarpa - SRR1821248	P.trichocarpa - SRR1821241	P.balsamifera - SRR1821322	P.trichocarpa - SRR1821247	P.trichocarpa - SRR1821249	P.trichocarpa - SRR1821251	P.trichocarpa - SRR1821239	P.trichocarpa - SRR1821254	P.trichocarpa - SRR1821235	P.trichocarpa - SRR1821240	P.trichocarpa - SRR1821237	P.trichocarpa - SRR1821246	P.trichocarpa - SRR1821252	P.balsamifera - SRR1821331	P.balsamifera - SRR1821333	P.balsamifera - SRR1821325	P.balsamifera - SRR1821346	P.balsamifera - SRR1821345	P.balsamifera - SRR1821336	P.trichocarpa - SRR1821238	P.trichocarpa - SRR1821250	P.balsamifera - SRR1821255	P.balsamifera - SRR1821718	P.balsamifera - SRR1821328	P.balsamifera - SRR1821259	P.balsamifera - SRR1821337	P.balsamifera - SRR1821347	P.balsamifera - SRR1821319	P.cathayana - SRR9007071	P.simonii - SRR9007072	P.koreana - SRR12235434	P.deltoides - SRR11622692	P.deltoides - SRR11622726	P.deltoides - SRR11622709	P.deltoides - SRR11622702	P.deltoides - SRR11622725	P.deltoides - SRR11622707	P.deltoides - SRR11622701	P.deltoides - SRR11622705	P.deltoides - SRR11622687	P.deltoides - SRR11622693	P.deltoides - SRR11622724	P.deltoides - SRR11622708	P.deltoides - SRR11622686	P.deltoides - SRR11622703
tig00001299	1090334	A	G	0 0	0 0	0 0	0 0	0 0	0 0	0 0	0 0	0 0	0 0	0 0	0 0	0 0	0 0	0 0	0 0	0 0	0 0	0 0	0 0	0 0	0 0	0 0	0 0	0 0	0 0	0 0	0 0	0 0	0 3	0 4	0 0	0 1	0 0	0 0	0 0	0 2	0 2	0 2	0 0	0 5	0 0	0 2	0 2	0 2	0 0
tig00001299	1090410	T	A	0 0	0 0	0 0	0 0	0 0	0 0	0 0	0 0	0 0	0 0	0 0	0 0	0 0	0 0	0 0	0 0	0 0	0 0	0 0	0 0	0 0	0 0	0 0	0 0	0 0	0 0	0 0	0 0	0 0	0 0	0 0	0 0	0 0	0 0	0 0	0 0	0 0	0 0	0 0	0 0	0 0	0 0	0 0	0 0	0 0	0 0
tig00001299	1090410	T	C	0 0	0 0	0 0	0 0	0 0	0 0	0 0	0 0	0 0	0 0	0 0	0 0	0 0	0 0	0 0	0 0	0 0	0 0	0 0	0 0	0 0	0 0	0 0	0 0	0 0	0 0	0 0	0 0	0 0	0 0	0 0	0 0	0 0	0 0	0 0	1 0	2 0	0 0	2 0	0 0	6 0	5 0	0 0	0 0	5 0	1 0
tig00001299	1090425	A	G	0 0	0 0	0 0	0 0	0 0	0 0	0 0	0 0	0 0	0 0	0 0	0 0	0 0	0 0	0 0	0 0	0 0	0 0	0 0	0 0	0 0	0 0	0 0	0 0	0 0	0 0	0 0	0 0	0 0	0 0	0 1	0 0	0 0	0 0	0 0	0 1	0 2	0 0	0 4	0 2	0 4	0 5	0 0	0 0	0 5	0 1
tig00001299	1090487	T	C	0 0	0 0	0 0	0 0	0 0	0 0	0 0	0 0	0 0	0 0	0 0	0 0	0 0	0 0	0 0	0 0	0 0	0 0	0 0	0 0	0 0	0 0	0 0	0 0	0 0	0 0	0 0	0 0	0 0	0 0	0 1	0 0	0 3	0 0	0 1	0 1	0 0	0 1	0 8	0 3	0 13	0 9	0 1	0 1	0 3	0 1
tig00001299	1090496	G	T	0 0	0 0	0 0	0 0	0 0	0 0	0 0	0 0	0 0	0 0	0 0	0 0	0 0	0 0	0 0	0 0	0 0	0 0	0 0	0 0	0 0	0 0	0 0	0 0	0 0	0 0	0 0	0 0	0 0	2 1	5 0	0 0	0 3	0 0	0 1	0 1	0 0	0 1	0 8	0 3	0 13	0 9	0 1	0 1	0 3	0 1
tig00001299	1090518	A	T	0 0	0 0	0 0	0 0	0 0	0 0	0 0	0 0	0 0	0 0	0 0	0 0	0 0	0 0	0 0	0 0	0 0	0 0	0 0	0 0	0 0	0 0	0 0	0 0	0 0	0 0	0 0	0 0	0 0	6 0	7 0	0 0	3 0	0 0	1 0	1 0	1 0	1 0	7 0	3 0	10 0	9 0	1 0	1 0	0 0	0 0
tig00001299	1090530	G	T	0 0	0 0	0 0	0 0	0 0	0 0	0 0	0 0	0 0	0 0	0 0	0 0	0 0	0 0	0 0	0 0	0 0	0 0	0 0	0 0	0 0	0 0	0 0	0 0	0 0	0 0	0 0	0 0	1 0	8 0	10 0	1 0	3 0	1 0	2 0	6 0	4 0	3 0	14 0	5 0	20 0	8 0	4 0	5 0	2 0	1 0
tig00001299	1090555	CT	C	0 0	0 0	0 0	0 0	0 1	0 0	0 0	0 0	0 0	0 0	0 0	0 0	0 0	0 0	0 1	0 0	0 0	0 0	0 0	0 0	0 0	0 0	0 0	0 0	0 0	0 0	0 0	0 0	0 7	1 13	0 11	0 1	0 0	0 0	0 0	0 0	0 0	0 3	0 0	0 0	0 24	0 9	0 0	0 1	0 0	0 0
tig00001299	1090555	C	CT	0 0	0 0	0 0	0 0	0 1	0 0	0 0	0 0	0 0	0 0	0 0	0 0	0 0	0 0	0 1	0 0	0 0	0 0	0 0	0 0	0 0	0 0	0 0	0 0	0 0	0 0	0 0	0 0	0 7	0 13	0 11	0 1	3 0	1 0	1 0	7 0	10 0	0 3	18 0	3 0	0 24	5 9	5 0	6 1	6 0	3 0
tig00001299	1090588	G	A	3 0	0 0	1 0	1 0	4 0	3 0	1 0	4 0	2 0	8 0	0 0	2 0	1 0	3 0	1 0	1 0	2 0	0 0	1 0	1 0	3 0	3 0	1 0	1 0	0 0	1 0	2 0	1 0	12 0	11 0	8 0	1 0	6 0	5 0	9 0	10 0	13 0	5 0	19 0	6 0	29 0	21 0	8 0	10 0	12 0	3 0
tig00001299	1090588	G	T	0 0	0 0	0 0	0 0	0 0	0 0	0 0	0 0	0 0	0 0	0 0	0 0	0 0	0 0	0 0	0 0	0 0	0 0	0 0	0 0	0 0	0 0	0 0	0 0	0 0	0 0	0 0	0 0	0 0	0 0	0 0	0 0	0 0	0 0	0 0	0 0	0 0	0 0	0 0	0 0	0 0	0 0	0 0	0 0	0 0	0 0
tig00001299	1090596	C	A	0 10	0 5	0 8	0 6	0 11	0 12	0 2	0 11	0 4	0 11	0 11	0 4	0 8	0 6	0 1	0 2	0 6	0 4	0 4	0 2	0 8	0 7	0 2	0 3	0 2	0 7	0 4	0 2	0 14	0 12	0 8	0 1	0 6	0 5	0 8	0 11	0 15	0 5	0 19	0 8	0 27	0 19	0 9	0 10	0 12	0 3
tig00001299	1090604	C	T	0 17	0 14	0 12	0 11	0 16	0 17	0 2	0 12	0 7	0 17	0 22	0 7	0 12	0 11	0 1	0 5	0 8	0 5	0 6	0 3	0 15	0 11	0 4	0 4	0 2	0 8	0 8	0 3	0 14	0 11	0 6	0 1	0 7	0 7	0 8	0 13	0 15	0 5	0 25	0 9	0 28	0 20	0 10	0 11	0 12	0 3
tig00001299	1090619	C	CCA	0 19	0 15	0 14	0 11	0 19	0 19	0 4	0 15	0 9	0 20	0 26	0 8	0 15	0 14	0 1	0 6	0 8	0 6	0 8	0 5	0 19	0 12	0 5	0 5	0 4	0 10	0 10	0 5	0 19	0 11	0 6	0 1	0 7	0 8	0 16	0 16	0 18	0 9	0 29	0 10	0 29	0 21	0 10	0 11	0 13	0 3
tig00001299	1090619	C	T	0 19	0 15	0 14	0 11	0 19	0 19	0 4	0 15	0 9	0 20	0 26	0 8	0 15	0 14	0 1	0 6	0 8	0 6	0 8	0 5	0 19	0 12	0 5	0 5	0 4	0 10	0 10	0 5	0 19	0 11	0 6	0 1	0 7	0 8	0 16	0 16	0 18	0 9	0 29	0 10	0 29	0 21	0 10	0 11	0 13	0 3
tig00001299	1090620	G	A	0 19	0 15	0 14	0 11	0 19	0 19	0 4	0 15	0 9	0 20	0 26	0 8	0 15	0 14	0 1	0 6	0 8	0 6	0 8	0 5	0 19	0 12	0 5	0 5	0 4	0 10	0 10	0 5	0 19	0 11	0 6	0 1	0 7	0 8	0 16	0 16	0 18	0 9	0 29	0 10	0 29	0 21	0 10	0 11	0 13	0 3
tig00001299	1090620	G	CAA	0 19	0 15	0 14	0 11	0 19	0 19	0 4	0 15	0 9	0 20	0 26	0 8	0 15	0 14	0 1	0 6	0 8	0 6	0 8	0 5	0 19	0 12	0 5	0 5	0 4	0 10	0 10	0 5	0 19	0 11	0 6	0 1	0 7	0 8	0 16	0 16	0 18	0 9	0 29	0 10	0 29	0 21	0 10	0 11	0 13	0 3
tig00001299	1090620	GC	CAGT	0 19	0 15	0 14	0 11	0 19	0 19	0 4	0 15	0 9	0 20	0 26	0 8	0 15	0 14	0 1	0 6	0 8	0 6	0 8	0 5	0 19	0 12	0 5	0 5	0 4	0 10	0 10	0 5	0 19	0 11	0 6	0 1	0 7	0 8	0 16	0 16	0 18	0 9	0 29	0 10	0 29	0 21	0 10	0 11	0 13	0 3
tig00001299	1090625	A	C	0 19	0 15	0 14	0 11	0 19	0 19	0 4	0 15	0 12	0 20	0 26	0 8	0 16	0 16	0 1	0 6	0 8	0 6	0 8	0 5	0 19	0 12	0 5	0 5	0 4	0 10	0 10	0 6	0 18	0 12	0 6	0 1	0 6	0 8	0 16	8 7	0 18	0 9	0 30	0 10	0 25	0 21	0 10	0 11	0 14	0 3
tig00001299	1090634	G	C	20 0	16 0	16 0	10 0	19 0	23 0	4 0	17 0	14 0	23 0	29 0	8 0	19 0	16 0	2 0	8 0	8 0	6 0	8 0	6 0	20 0	15 0	7 0	6 0	5 0	11 0	12 0	6 0	19 0	10 0	8 0	1 0	5 0	8 0	16 0	16 0	21 0	12 0	29 0	9 0	21 0	19 0	11 0	11 0	14 0	2 0
tig00001299	1090640	C	A	0 23	0 23	0 19	0 11	0 21	0 23	0 6	0 17	0 14	0 24	0 34	0 11	0 21	0 18	0 3	0 8	0 11	0 6	0 8	0 10	0 22	0 19	0 6	0 8	0 5	0 11	0 14	0 8	0 22	0 9	0 9	0 1	0 5	0 9	0 16	0 18	0 23	0 17	0 30	0 9	15 8	0 19	0 12	0 12	0 17	0 3
tig00001299	1090643	A	G	0 23	0 26	0 22	0 11	0 23	0 25	0 6	0 18	0 19	0 26	0 36	0 14	0 23	0 21	0 5	0 8	0 11	0 6	0 8	0 10	0 22	0 21	0 7	0 8	0 5	0 11	0 16	0 8	0 21	0 9	0 9	0 1	0 5	0 10	0 16	0 18	0 24	0 17	0 30	0 9	8 15	6 16	0 12	0 13	0 16	0 3
tig00001299	1090648	GAC	G	0 24	0 29	0 23	0 11	0 24	0 29	0 6	0 21	0 21	0 29	0 41	0 15	0 26	0 23	0 4	0 9	0 11	0 8	0 8	0 12	0 23	0 22	0 8	0 9	0 5	0 10	0 19	0 8	0 20	0 13	0 11	0 1	0 5	0 11	0 19	0 19	0 25	0 17	0 35	0 10	0 23	0 24	0 13	0 13	0 17	0 3
tig00001299	1090657	A	G	0 27	0 34	0 25	0 16	0 31	0 33	0 9	0 27	0 24	0 32	0 50	0 20	0 32	0 25	0 4	0 11	0 12	0 11	0 11	0 13	0 26	0 23	0 13	0 11	0 6	1 11	0 20	0 9	0 23	0 14	0 12	0 1	0 5	0 14	0 19	0 20	0 25	0 23	0 37	0 11	0 23	0 24	0 15	0 14	0 16	0 4
tig00001299	1090658	C	A	0 28	0 34	0 24	0 16	0 31	0 33	0 9	0 27	0 24	0 32	0 50	0 20	0 33	0 24	0 4	0 10	0 12	0 11	0 11	0 14	0 26	10 13	0 13	0 11	0 6	0 12	0 20	0 9	0 23	0 14	0 12	0 1	0 5	0 14	0 19	0 20	0 25	0 23	0 36	0 12	0 22	0 23	0 15	0 14	0 17	0 4
tig00001299	1090666	TATA	CATG	0 28	0 34	0 25	0 15	0 31	0 33	0 9	0 26	0 24	0 32	0 50	0 20	0 33	0 25	0 3	0 11	0 12	0 11	0 11	0 14	0 26	0 23	0 13	0 11	0 6	0 12	0 20	0 9	0 22	0 14	0 12	0 2	0 5	0 14	0 19	0 19	0 27	0 23	0 39	0 12	0 22	0 23	0 12	0 14	0 17	0 3
tig00001299	1090676	C	T	0 28	0 34	0 25	0 16	0 31	0 33	0 9	0 26	0 22	0 32	0 50	0 20	0 33	0 24	0 4	0 10	0 12	0 11	0 11	0 14	0 26	0 23	0 12	0 11	0 6	0 12	0 20	0 9	0 23	0 14	0 11	0 2	0 5	0 12	0 20	0 15	0 27	0 16	0 41	0 10	0 21	0 24	0 12	0 14	0 16	0 4
tig00001299	1090690	C	T	0 25	0 32	0 20	0 13	0 26	0 25	0 7	0 22	0 18	0 24	0 48	0 18	0 28	0 19	0 4	0 9	0 6	0 8	0 9	0 11	0 23	0 19	0 11	0 9	0 5	0 9	0 16	0 6	0 16	0 11	0 10	0 2	0 4	0 16	0 18	7 3	0 23	0 15	0 29	0 9	0 15	0 19	0 10	0 10	0 9	0 3
tig00001299	1090700	A	G	0 14	0 25	0 13	0 8	0 19	0 16	0 7	0 15	1 14	0 20	0 34	0 15	0 22	0 14	0 4	0 7	0 6	0 5	0 6	0 9	0 16	0 13	0 9	0 7	0 4	0 5	0 13	0 6	0 13	0 11	0 9	0 2	0 2	0 16	0 18	0 13	0 21	0 18	0 28	0 8	0 11	0 16	0 11	0 7	0 11	0 3
tig00001299	1090721	C	T	0 10	0 19	0 11	0 5	0 13	0 14	0 5	0 12	0 10	0 12	0 22	0 13	0 17	0 6	0 4	0 4	0 4	0 4	0 4	0 8	0 7	0 8	0 7	0 6	0 2	0 2	0 9	0 3	0 8	0 7	0 5	0 2	0 1	0 14	0 13	0 13	0 19	0 18	0 26	0 8	0 13	0 16	0 9	0 6	0 10	0 4
tig00001299	1090766	A	G	0 0	0 0	0 0	0 0	0 0	0 0	0 0	0 0	0 0	0 0	0 0	0 1	0 0	0 0	0 0	0 0	0 0	0 0	0 0	0 1	0 0	0 0	0 0	0 0	0 0	0 0	0 0	0 0	0 0	0 3	0 4	0 1	0 0	0 10	0 8	0 9	0 12	0 12	0 21	0 5	0 12	0 13	0 7	0 3	0 7	0 4
tig00001299	1090778	T	A	0 0	0 0	0 0	0 0	0 0	0 0	0 0	0 0	0 0	0 0	0 0	0 1	0 0	1 0	0 0	0 0	0 0	1 0	1 0	0 0	0 0	0 0	0 0	2 0	0 0	0 0	0 0	0 0	0 0	4 0	4 0	1 0	0 0	11 0	8 0	9 0	14 0	10 0	16 0	6 0	12 0	13 0	7 0	2 0	7 0	4 0
tig00001299	1090874	A	G	0 0	0 0	0 0	0 0	0 0	0 0	0 0	0 0	0 0	0 0	0 0	0 0	0 0	0 0	0 0	0 0	0 0	0 0	0 0	0 0	0 0	0 0	0 0	0 0	0 0	1 0	0 0	0 0	0 0	5 0	8 0	1 0	3 0	5 0	4 0	7 0	4 0	1 0	3 0	2 0	3 0	4 0	1 0	0 0	3 0	0 0
tig00001299	1090887	G	GAA	0 0	0 0	0 0	0 0	0 0	0 0	0 0	0 0	0 0	0 0	0 0	0 0	0 0	0 0	0 0	0 0	0 0	0 0	0 0	0 0	0 0	0 0	0 0	0 0	0 0	0 0	0 0	0 0	0 0	0 3	0 9	0 1	0 3	0 5	0 3	0 5	0 3	0 0	0 2	0 1	0 0	0 4	0 0	0 0	0 5	0 0
tig00001299	1090888	AAAAAAAT	GAAAAAAA	0 0	0 0	0 0	0 0	0 0	0 0	0 0	0 0	0 0	0 0	0 0	0 0	0 0	0 0	0 0	0 0	0 0	0 0	0 0	0 0	0 0	0 0	0 0	0 0	0 0	0 0	0 0	0 0	0 0	0 3	0 9	0 1	0 3	0 5	0 3	0 5	0 3	0 0	0 2	0 1	0 0	0 4	0 0	0 0	0 5	0 0
tig00001299	1090894	A	T	0 0	0 0	0 0	0 0	0 0	0 0	0 0	0 0	0 0	0 0	0 0	0 0	0 0	0 0	0 0	0 0	0 0	0 0	0 0	0 0	0 0	0 0	0 0	0 0	0 0	0 0	0 0	0 0	0 0	0 3	0 9	0 1	0 3	0 5	0 3	0 5	0 3	0 0	0 2	0 1	0 0	0 4	0 0	0 0	0 5	0 0
tig00001299	1090924	A	G	0 0	0 0	0 0	0 0	0 0	0 0	0 0	0 0	0 0	0 0	0 0	0 0	0 0	0 0	0 0	0 0	0 0	0 0	0 0	0 0	0 0	0 0	0 0	0 0	0 0	0 0	0 0	0 0	0 0	3 0	6 2	2 0	0 5	0 4	0 1	0 5	0 3	0 1	0 3	0 1	0 3	0 3	0 0	0 0	0 3	0 0
tig00001299	1090942	AGCTAAT	GGCAAA	0 0	0 0	0 0	0 0	0 0	0 0	0 0	0 0	0 0	0 0	0 0	0 0	0 0	0 0	0 0	0 0	0 0	0 0	0 0	0 0	0 0	0 0	0 0	0 0	0 0	0 0	0 0	0 0	0 0	0 0	0 2	0 0	0 4	0 4	0 1	0 2	0 0	0 1	0 2	0 1	0 3	0 2	0 0	0 0	0 4	0 2
tig00001299	1090945	T	A	0 0	0 0	0 0	0 0	0 0	0 0	0 0	0 0	0 0	0 0	0 0	0 0	0 0	0 0	0 0	0 0	0 0	0 0	0 0	0 0	0 0	0 0	0 0	0 0	0 0	0 0	0 0	0 0	0 0	0 0	0 2	0 0	0 4	0 4	0 1	0 2	0 0	0 1	0 2	0 1	0 3	0 2	0 0	0 0	0 4	0 2
tig00001299	1090945	TAATC	AAAT	0 0	0 0	0 0	0 0	0 0	0 0	0 0	0 0	0 0	0 0	0 0	0 0	0 0	0 0	0 0	0 0	0 0	0 0	0 0	0 0	0 0	0 0	0 0	0 0	0 0	0 0	0 0	0 0	0 0	3 0	4 2	3 0	0 4	0 4	0 1	0 2	0 0	0 1	0 2	0 1	0 3	0 2	0 0	0 0	0 4	0 2
tig00001299	1090959	AT	GG	0 0	0 0	0 0	0 0	0 0	0 0	0 0	0 0	0 0	0 0	0 0	0 0	0 0	0 0	0 0	0 0	0 0	0 0	0 0	0 0	0 0	0 0	0 0	0 0	0 0	0 0	0 0	0 0	0 0	0 5	0 7	0 3	0 4	0 6	0 1	0 3	0 0	0 2	0 2	0 1	0 3	0 0	0 0	0 0	0 4	0 2
tig00001299	1090966	TTTA	T	0 0	0 0	0 0	0 0	0 0	0 0	0 0	0 0	0 0	0 0	0 0	0 0	0 0	0 0	0 0	0 0	0 0	0 0	0 0	0 0	0 0	0 0	0 0	0 0	0 0	0 0	0 0	0 0	0 0	0 4	0 2	0 2	0 4	0 7	0 1	0 2	0 0	0 1	0 2	0 0	0 4	0 0	0 1	0 0	0 4	0 2
tig00001299	1090983	ATG	CGA	0 0	0 0	0 0	0 0	0 0	0 0	0 0	0 0	0 0	0 0	0 0	0 0	0 0	0 0	0 0	0 0	0 0	0 0	0 0	0 0	0 0	0 0	0 0	0 0	0 0	0 0	0 0	0 0	0 0	0 0	0 0	0 0	0 0	0 0	0 0	0 0	0 0	0 0	0 0	0 0	0 0	0 0	0 0	0 0	0 0	0 0
tig00001299	1090984	T	C	0 0	0 0	0 0	0 0	0 0	0 0	0 0	0 0	0 0	0 0	0 0	0 0	0 0	0 0	0 0	0 0	0 0	0 0	0 0	0 0	0 0	0 0	0 0	0 0	0 0	0 0	0 0	0 0	0 0	5 0	1 0	3 0	4 0	6 0	0 0	2 0	0 0	0 0	2 0	1 0	0 0	0 0	0 0	0 0	4 0	2 0
tig00001299	1090984	TGT	CGC	0 0	0 0	0 0	0 0	0 0	0 0	0 0	0 0	0 0	0 0	0 0	0 0	0 0	0 0	0 0	0 0	0 0	0 0	0 0	0 0	0 0	0 0	0 0	0 0	0 0	0 0	0 0	0 0	0 0	0 0	0 0	0 0	0 0	0 0	0 0	0 0	0 0	2 0	0 0	0 0	5 0	1 0	1 0	0 0	0 0	0 0
tig00001299	1090992	A	T	0 0	0 0	0 0	0 0	0 0	0 0	0 0	0 0	0 0	0 0	0 0	0 0	0 0	0 0	0 0	0 0	0 0	0 0	0 0	0 0	0 0	0 0	0 0	0 0	0 0	0 0	0 0	0 0	0 0	0 5	0 1	0 3	0 4	0 6	0 0	0 4	0 1	0 2	0 2	0 1	0 5	0 1	0 1	0 0	0 6	0 4
tig00001299	1090993	C	T	0 0	0 0	0 0	0 0	0 0	0 0	0 0	0 0	0 0	0 0	0 0	0 0	0 0	0 0	0 0	0 0	0 0	0 0	0 0	0 0	0 0	0 0	0 0	0 0	0 0	0 0	0 0	0 0	0 0	0 5	0 1	0 3	0 4	0 6	0 0	0 4	0 1	0 2	0 2	0 1	0 5	0 1	0 1	0 0	0 6	0 4
tig00001299	1091004	T	A	0 0	0 0	0 0	0 0	0 0	0 0	0 0	0 0	0 0	0 0	0 0	0 0	0 0	0 0	0 0	0 0	0 0	0 0	0 0	0 0	0 0	0 0	0 0	0 0	0 0	0 0	0 0	0 0	0 0	0 7	0 3	0 4	0 4	0 6	0 0	0 5	0 1	0 2	0 2	0 1	0 4	0 1	0 1	0 0	0 6	0 4
tig00001299	1091019	C	G	0 0	0 0	0 0	0 0	0 0	0 0	0 0	0 0	0 0	0 0	0 0	0 0	0 0	0 0	0 0	0 0	0 0	0 0	0 0	0 0	0 0	0 0	0 0	0 0	0 0	0 0	0 0	0 0	0 0	0 7	0 4	0 5	0 3	0 7	0 1	0 5	0 2	0 2	0 2	0 1	0 6	0 1	0 2	0 1	0 7	0 4
tig00001299	1091042	C	A	0 0	0 0	0 0	0 0	0 0	0 0	0 0	0 0	0 0	0 0	0 0	0 0	0 0	0 0	0 0	0 0	0 0	0 0	0 0	0 0	0 0	0 0	0 0	0 0	0 0	0 0	0 0	0 0	0 0	0 10	0 4	0 5	0 6	0 7	0 9	0 9	0 2	0 2	0 3	0 1	0 8	0 2	0 2	0 1	0 7	0 4
tig00001299	1091044	A	G	0 0	0 0	0 0	0 0	0 0	0 0	0 0	0 0	0 0	0 0	0 0	0 0	0 0	0 0	0 0	0 0	0 0	0 0	0 0	0 0	0 0	0 0	0 0	0 0	0 0	0 0	0 0	0 0	0 0	6 5	0 4	0 5	0 5	0 7	0 9	0 9	0 2	0 2	0 3	0 1	0 7	0 2	0 2	0 1	0 7	0 4
tig00001299	1091090	A	G	0 0	0 0	0 0	0 0	0 0	0 0	0 0	0 0	0 0	0 0	0 0	0 0	0 0	0 0	0 0	0 0	0 0	0 0	0 0	0 0	0 0	0 0	0 0	0 0	0 0	0 0	0 0	0 0	0 0	0 8	0 3	0 7	0 4	0 7	0 12	0 13	0 7	0 6	0 5	0 1	0 12	0 5	0 2	0 5	0 9	0 5
tig00001299	1091096	A	T	0 0	0 0	0 0	0 0	0 0	0 0	0 0	0 0	0 0	0 0	0 0	0 0	0 0	0 0	0 0	0 0	0 0	0 0	0 0	0 0	0 0	0 0	0 0	0 0	0 0	0 0	0 0	0 0	0 0	0 6	0 1	0 7	0 4	0 9	0 13	0 14	0 7	0 5	0 4	0 1	0 12	0 9	0 2	0 6	0 12	0 5
tig00001299	1091098	TATCAATTA	T	0 0	0 0	0 0	0 0	0 0	0 0	0 0	0 0	0 0	0 0	0 0	0 0	0 0	0 0	0 0	0 0	0 0	0 0	0 0	0 0	0 0	0 0	0 0	0 0	0 0	0 0	0 0	0 0	0 0	2 2	0 0	5 0	0 4	0 7	0 13	0 13	0 7	0 5	0 5	0 1	0 12	0 9	0 2	0 6	0 12	0 5
tig00001299	1091129	A	T	0 0	0 0	0 0	0 0	0 0	0 0	0 0	0 0	0 0	0 0	0 0	0 0	0 0	0 0	0 0	0 0	0 0	0 0	0 0	0 0	0 0	0 0	0 0	0 0	0 0	0 0	0 0	0 0	0 0	0 2	0 0	0 10	0 9	0 10	0 17	0 15	0 14	0 7	0 5	0 4	0 14	0 9	0 6	0 9	0 13	0 6
tig00001299	1091137	AT	GA	0 0	1 0	1 0	0 0	1 0	1 0	0 0	0 0	0 0	1 0	1 0	0 0	0 0	0 0	0 0	0 0	0 0	0 0	0 0	0 0	0 0	2 0	0 0	1 0	0 0	0 0	0 0	0 0	0 0	1 0	0 0	10 0	0 0	0 0	0 0	0 0	0 0	0 0	0 0	0 0	0 0	0 0	0 0	0 0	0 0	0 0
tig00001299	1091138	T	A	0 0	0 0	0 0	0 0	0 0	0 0	0 0	0 0	0 0	0 0	0 0	0 0	0 0	0 0	0 0	0 0	0 0	0 0	0 0	0 0	0 0	0 0	0 0	0 0	0 0	0 0	0 0	0 0	1 0	0 0	0 0	0 0	7 0	9 0	18 0	14 0	11 0	5 0	5 0	3 0	14 0	9 0	5 0	7 0	12 0	6 0
tig00001299	1091138	T	TAA	0 0	0 0	0 0	0 0	0 0	0 0	0 0	0 0	0 0	0 0	0 0	0 0	0 0	0 0	0 0	0 0	0 0	0 0	0 0	0 0	0 0	0 0	0 0	0 0	0 0	0 0	0 0	0 0	0 0	0 0	0 0	0 0	0 0	0 0	0 0	0 0	0 0	0 0	0 0	0 0	0 0	0 0	0 0	0 0	0 0	0 0
tig00001299	1091167	A	T	0 12	0 17	0 22	0 4	0 22	0 24	0 7	0 25	0 14	0 19	0 20	0 21	0 22	0 16	0 3	0 5	0 7	0 4	0 9	0 7	0 17	0 18	0 7	0 10	0 4	0 5	0 9	0 5	0 18	0 8	0 7	0 8	0 13	0 15	0 25	0 26	0 17	0 12	0 16	0 6	0 21	0 14	0 7	0 12	0 16	0 12
tig00001299	1091169	G	A	0 14	0 19	0 23	0 4	0 23	0 24	0 7	0 25	0 14	0 19	0 22	0 21	0 22	0 17	0 3	0 7	0 7	0 4	0 9	0 7	0 17	0 19	0 7	0 11	0 5	0 5	0 9	0 7	0 18	0 8	0 7	0 8	0 15	0 15	0 25	0 29	0 18	0 12	0 16	0 6	0 21	0 13	0 7	0 12	0 16	0 12
tig00001299	1091173	C	G	0 17	0 19	0 25	0 4	0 26	0 27	0 7	0 26	0 15	0 20	0 24	0 21	0 24	0 18	0 4	0 8	0 8	0 5	0 10	0 8	0 17	0 20	0 9	0 12	0 6	0 5	0 9	0 8	0 19	0 10	0 8	0 9	0 15	0 18	0 24	0 28	0 19	0 13	0 15	0 6	0 24	0 14	0 7	0 13	0 20	0 13
tig00001299	1091189	C	A	0 23	0 35	0 36	0 7	0 34	0 42	0 13	0 33	0 18	0 30	0 37	0 29	0 37	0 28	0 7	0 14	0 14	0 9	0 10	0 15	0 29	0 30	0 11	0 19	0 10	0 10	0 13	0 13	0 33	0 13	0 10	0 6	0 15	0 19	0 19	0 28	0 19	0 15	0 17	0 12	0 27	0 16	0 11	0 16	0 24	0 20
tig00001299	1091190	A	T	0 25	0 36	0 36	0 8	0 34	0 44	0 14	0 34	0 18	0 30	0 38	0 30	0 37	0 29	0 7	0 14	0 14	0 9	0 10	0 16	0 29	0 30	0 11	0 19	0 10	0 10	0 14	0 13	0 34	0 13	0 12	0 7	0 14	0 20	0 19	0 28	0 19	1 15	0 18	0 12	0 28	0 15	0 11	0 16	0 24	0 21
tig00001299	1091193	A	C	0 27	0 40	1 36	0 10	0 35	0 44	0 16	0 35	0 19	0 34	0 41	0 31	0 40	0 29	0 7	0 16	0 14	0 10	0 11	0 16	0 29	0 30	0 11	0 19	0 13	0 10	0 15	0 15	0 34	0 13	0 13	0 7	0 12	0 18	0 19	0 28	0 18	0 17	0 17	0 11	0 29	0 16	0 11	0 15	0 22	0 21
tig00001299	1091212	G	A	0 36	0 55	0 52	0 13	0 48	0 53	0 23	0 49	0 32	0 51	0 52	0 39	0 48	0 39	0 11	0 17	0 16	0 12	0 16	0 17	0 41	0 40	0 14	0 23	0 17	0 17	0 17	0 16	0 43	0 18	0 20	0 8	0 18	0 26	0 21	0 27	0 18	0 17	0 20	0 13	14 19	9 6	0 17	0 17	0 25	0 21
tig00001299	1091240	T	C	52 0	73 0	64 0	13 0	46 0	59 0	25 0	58 0	39 0	59 0	65 0	49 0	60 0	49 0	10 0	21 0	22 0	9 6	20 0	19 6	46 0	19 27	21 0	33 0	21 1	14 6	21 0	17 0	28 23	0 19	0 26	0 10	0 20	0 26	0 21	0 26	0 16	0 16	0 25	0 20	0 30	0 13	0 19	0 15	0 27	0 19
tig00001299	1091252	C	A	0 54	0 78	0 61	0 17	0 43	0 60	0 24	0 57	0 45	0 56	0 63	0 43	0 58	0 51	0 9	0 24	0 18	0 19	0 17	0 26	0 52	0 49	0 20	0 31	0 24	0 18	0 22	0 15	0 49	0 16	0 27	0 9	0 20	1 27	0 19	0 27	0 16	0 16	0 26	0 20	0 30	0 13	0 15	0 15	0 24	0 19
tig00001299	1091256	C	A	0 55	0 75	0 62	0 18	0 44	0 59	0 25	0 55	0 42	0 55	0 65	0 43	0 56	0 55	0 9	0 23	0 21	0 19	0 16	0 24	0 54	0 46	0 19	0 29	0 23	0 17	0 24	0 16	0 48	0 16	0 25	0 9	21 0	28 0	10 9	12 15	7 10	0 16	26 0	20 0	0 28	5 7	10 5	9 4	25 0	20 0
tig00001299	1091281	A	C	0 62	0 68	0 58	0 18	0 36	0 60	0 25	0 48	0 46	0 59	0 63	0 46	0 54	0 58	0 10	0 21	0 16	0 16	0 16	0 24	0 55	0 45	0 18	0 22	0 18	0 14	0 24	0 14	0 41	0 14	0 24	0 9	0 19	0 24	0 15	0 27	0 15	0 16	0 29	0 20	0 29	0 14	0 17	0 12	0 23	0 20
tig00001299	1091285	ATAT	GTAA	0 0	0 0	0 0	0 0	0 0	0 0	0 0	17 0	20 0	0 0	0 0	0 0	0 0	0 0	0 0	0 0	0 0	0 0	0 0	0 0	0 0	0 0	0 0	0 0	0 0	0 0	0 0	3 0	0 13	0 13	0 22	0 9	0 16	0 25	0 4	0 24	0 15	0 15	0 25	0 19	0 26	0 13	0 17	0 10	0 21	0 18
tig00001299	1091288	T	A	58 0	64 0	53 0	15 0	32 0	52 0	24 0	27 0	23 0	55 0	60 0	42 0	49 0	52 0	7 0	18 0	13 0	16 0	16 0	20 0	49 0	42 0	18 0	18 0	16 0	14 0	20 0	7 0	19 13	0 13	0 22	0 9	0 16	0 25	0 4	0 24	0 15	0 15	0 25	0 19	0 26	0 13	0 17	0 10	0 21	0 18
tig00001299	1091291	A	G	0 57	0 62	0 51	0 14	0 33	0 50	0 22	0 44	0 41	0 52	0 57	0 39	0 48	0 52	0 7	0 16	0 13	0 15	0 16	0 18	0 47	0 41	0 18	0 18	0 14	0 13	0 19	0 10	0 31	0 13	0 21	0 9	0 16	0 23	0 9	0 25	0 15	0 15	0 25	0 20	0 28	0 11	0 17	0 10	0 21	0 18
tig00001299	1091305	GTCAGG	TGTCAGA	0 0	0 0	0 0	0 0	0 0	0 0	0 0	0 0	0 0	0 0	0 0	0 0	0 0	0 0	0 0	0 0	0 0	0 0	0 0	0 0	0 0	0 0	0 0	0 0	0 0	0 0	0 0	0 0	0 7	3 0	11 0	6 0	0 14	0 20	0 7	0 15	0 13	0 11	0 21	0 17	0 24	0 10	0 16	0 8	0 19	0 12
tig00001299	1091310	G	A	12 0	14 0	10 0	2 0	5 0	7 0	4 0	5 0	3 0	8 0	14 0	8 0	11 0	7 0	0 0	2 0	0 0	3 0	1 0	0 0	4 0	6 0	1 0	3 0	3 0	2 0	5 0	2 0	3 7	0 0	0 0	0 0	0 14	0 20	0 7	0 15	0 13	0 11	0 21	0 17	0 24	0 10	0 16	0 8	0 19	0 12
tig00001299	1091310	GGTCT	AGTCC	0 0	0 0	0 0	0 0	0 0	0 0	0 0	0 0	0 0	0 0	0 0	0 0	0 0	0 0	0 0	0 0	0 0	0 0	0 0	0 0	0 0	0 0	0 0	0 0	0 0	0 0	0 0	0 0	0 7	0 0	0 0	0 0	0 14	0 20	0 7	0 15	0 13	0 11	0 21	0 17	0 24	0 10	0 16	0 8	0 19	0 12
tig00001299	1091339	A	T	0 50	0 48	0 32	0 14	0 33	0 44	0 18	0 31	0 31	0 37	0 43	0 27	0 35	0 33	0 8	0 14	0 11	0 13	0 14	0 10	0 45	0 36	0 12	0 9	0 14	0 9	0 16	0 10	0 12	0 10	0 10	0 10	0 12	0 19	0 6	0 11	0 10	0 12	0 14	0 13	0 17	0 11	0 12	0 5	0 8	0 8
tig00001299	1091359	A	G	0 39	0 32	0 20	0 8	0 26	0 31	0 16	0 21	0 23	0 29	0 32	0 20	0 25	0 22	0 7	0 8	0 6	0 7	0 10	0 7	0 27	0 25	0 10	0 7	0 11	0 8	0 12	0 8	0 8	0 5	0 9	0 10	0 7	0 12	0 2	0 8	0 9	0 8	0 10	0 10	0 9	0 9	0 6	0 3	0 7	0 8
tig00001299	1091361	A	G	0 38	0 32	0 19	0 8	0 25	0 30	0 16	0 21	0 21	0 29	0 30	0 19	0 23	0 22	0 6	0 8	0 7	0 6	0 10	0 7	0 28	0 23	0 10	0 7	0 11	0 8	0 12	0 8	0 8	0 6	0 9	0 11	0 7	0 12	0 2	3 5	0 9	0 8	0 11	0 11	0 9	0 9	0 6	0 3	0 7	0 8
tig00001299	1091362	A	G	0 38	0 31	0 19	0 8	0 25	0 30	0 16	0 19	0 21	0 29	0 30	0 19	0 21	0 22	0 6	0 8	0 7	0 6	0 10	0 7	0 27	0 22	0 10	0 7	0 11	0 8	0 11	0 8	0 8	0 6	0 9	0 11	0 7	0 11	0 2	0 8	0 9	0 8	0 11	0 11	0 8	0 9	0 6	0 3	0 7	0 8
tig00001299	1091396	C	T	0 22	0 25	0 15	0 7	0 20	0 16	0 10	0 17	0 17	0 16	0 21	0 9	0 14	0 13	0 5	0 4	0 5	0 5	0 9	0 4	0 20	0 15	0 6	0 6	0 10	0 6	0 8	0 6	0 6	0 5	0 8	0 11	5 0	8 0	1 0	4 0	7 0	7 0	3 0	5 0	7 0	4 0	4 0	1 0	3 0	7 0
tig00001299	1091416	T	C	0 13	0 16	0 3	0 5	0 7	0 7	0 6	0 7	0 8	0 6	0 8	0 1	0 4	0 6	0 1	0 3	0 2	0 3	0 2	0 3	0 10	0 7	0 4	0 2	0 5	0 3	0 2	0 4	0 2	0 4	0 4	0 9	0 2	0 8	0 1	0 4	0 1	0 4	0 6	0 3	0 7	0 4	0 4	0 1	0 2	0 8
tig00001299	1091426	TATGG	CATGA	0 0	0 0	0 0	0 0	0 0	0 0	0 0	0 0	0 0	0 0	0 0	0 0	0 0	0 0	0 0	0 0	0 0	0 0	0 0	0 0	0 0	0 0	0 0	0 0	0 0	0 0	0 0	0 0	0 0	0 0	0 0	0 0	1 0	4 0	0 0	5 0	0 0	0 0	6 0	3 0	0 0	1 0	1 0	1 0	2 0	6 0
tig00001299	1091430	G	A	0 0	3 0	1 0	1 0	0 0	2 0	0 0	1 0	2 0	0 0	0 0	0 0	0 0	0 0	0 0	0 0	0 0	1 0	0 0	0 0	2 0	0 0	0 0	0 0	0 0	0 0	0 0	0 0	0 0	0 0	0 0	8 0	0 0	0 0	1 0	0 0	1 0	4 0	0 0	0 0	4 0	2 0	0 0	1 0	0 0	0 0
tig00001299	1091455	T	C	0 9	0 20	0 20	0 6	0 15	0 16	0 7	0 13	0 11	0 11	0 16	0 10	0 17	0 10	0 1	0 1	0 6	0 10	0 4	0 3	0 10	0 9	0 8	0 6	0 11	0 2	0 3	0 5	0 5	0 3	0 6	0 10	0 1	0 2	0 1	0 4	0 0	0 0	0 7	0 2	0 2	0 3	0 1	0 2	0 2	0 5
tig00001299	1091466	CTTTG	ATTTA	0 11	0 27	0 28	0 7	0 20	0 24	0 8	0 21	0 12	0 17	0 22	0 16	0 21	0 10	0 1	0 2	0 10	0 12	0 5	0 5	0 16	0 15	0 9	0 10	0 11	0 5	0 5	0 6	0 6	0 5	0 7	0 10	0 1	0 0	0 1	0 2	0 0	0 0	0 7	0 2	0 2	0 2	0 0	0 2	0 4	0 5
tig00001299	1091472	T	C	0 15	0 27	0 30	0 8	0 21	0 27	0 9	0 27	0 13	0 19	0 24	0 21	0 22	0 12	0 2	0 2	0 10	0 14	0 7	0 6	0 17	0 18	0 11	0 11	0 13	0 7	0 5	0 7	0 8	0 6	0 8	0 9	0 1	0 0	0 1	0 2	0 0	0 0	0 10	0 2	0 2	0 2	0 0	0 2	0 4	0 5
tig00001299	1091479	C	A	18 0	28 0	34 0	9 0	22 0	29 0	10 0	28 0	20 0	22 0	28 0	25 0	24 0	15 0	4 0	4 0	10 0	14 0	8 0	6 0	21 0	22 0	13 0	13 0	14 0	9 0	7 0	9 0	10 0	0 8	0 9	0 10	0 1	0 0	0 1	0 2	0 0	0 0	0 9	0 1	0 1	0 2	0 0	0 1	0 4	0 3
tig00001299	1091482	A	G	0 20	0 28	0 35	0 11	0 22	0 31	0 10	0 29	0 21	0 23	0 31	0 27	0 27	0 15	0 4	0 4	0 12	0 16	0 8	0 7	0 25	0 23	0 13	0 13	0 15	0 10	0 7	0 9	0 10	0 9	9 0	0 10	0 0	0 0	0 0	0 2	0 0	0 0	0 9	0 1	0 0	0 1	0 0	0 1	0 4	0 4
tig00001299	1091496	A	G	0 25	0 31	0 37	0 13	0 26	0 37	0 12	0 34	0 29	0 30	0 41	0 31	0 32	0 24	0 4	0 6	0 13	0 21	0 9	0 11	0 29	0 33	0 14	0 14	0 16	0 10	0 7	0 10	0 14	0 12	0 11	0 11	0 0	0 0	0 0	3 0	0 0	0 0	9 0	1 0	0 0	1 0	0 0	1 0	3 0	3 0
tig00001299	1091503	TG	GC	0 26	0 31	0 39	0 13	0 28	0 37	0 13	0 34	0 30	0 30	0 42	0 32	0 33	0 24	0 4	0 7	0 13	0 21	0 9	0 11	0 28	0 13	0 14	0 14	0 16	0 10	0 7	0 10	0 14	1 13	0 11	0 10	0 0	0 0	0 1	0 3	0 0	0 0	0 10	0 1	0 1	0 1	0 0	0 1	0 3	0 2
tig00001299	1091504	G	C	0 26	0 31	0 39	0 13	0 28	0 37	0 13	0 34	0 30	0 30	0 42	0 32	0 33	0 24	0 4	0 7	0 13	0 21	0 9	0 11	0 28	0 13	0 14	0 14	0 16	0 10	0 7	0 10	0 14	0 13	0 11	0 10	0 0	0 0	0 1	0 3	0 0	0 0	0 10	0 1	0 1	0 1	0 0	0 1	0 3	0 2
tig00001299	1091512	A	G	0 26	0 31	0 39	0 13	0 28	0 37	0 13	0 34	0 30	0 30	0 41	0 32	0 33	0 23	0 4	0 7	0 13	0 21	0 9	0 11	0 28	0 33	0 14	0 14	0 16	0 10	0 7	0 10	0 14	0 14	0 12	0 9	0 0	0 0	0 1	0 3	0 0	0 0	0 10	0 1	0 1	0 1	0 0	0 1	0 3	0 2
tig00001299	1091594	T	C	0 0	0 0	0 0	0 0	0 0	0 0	0 0	0 0	0 0	0 0	0 0	0 0	0 0	0 0	0 0	0 0	0 0	0 0	0 0	0 0	0 0	0 0	0 0	0 0	0 0	0 0	0 0	0 0	0 0	0 9	0 11	0 7	0 2	0 0	0 0	0 3	0 0	0 0	0 3	0 3	0 1	0 0	0 0	0 0	0 2	0 0
tig00001299	1091601	G	A	0 0	0 0	0 0	0 0	0 0	0 0	0 0	0 0	0 0	0 0	0 0	0 0	0 0	0 0	0 0	0 0	0 0	0 0	0 0	0 0	0 0	0 0	0 0	0 0	0 0	0 0	0 0	0 0	0 0	0 11	0 11	0 5	0 2	0 0	0 1	0 4	0 0	0 0	0 3	0 3	0 1	0 0	0 0	0 0	0 2	0 0
tig00001299	1091607	A	G	0 0	0 0	0 0	0 0	0 0	0 0	0 0	0 0	0 0	0 0	0 0	0 0	0 0	0 0	0 0	0 0	0 0	0 0	0 0	0 0	0 0	0 0	0 0	0 0	0 0	0 0	0 0	0 0	0 0	0 12	0 13	0 5	0 2	0 0	1 0	0 4	0 0	0 0	0 4	0 3	1 0	0 0	0 0	0 0	0 2	0 0
tig00001299	1091644	A	C	0 0	0 0	0 0	0 0	0 0	0 0	0 0	0 0	0 0	0 0	0 0	0 0	0 0	0 0	0 0	0 0	0 0	0 0	0 0	0 0	0 0	0 0	0 0	0 0	0 0	0 0	0 0	0 0	0 0	0 11	0 17	0 4	0 2	0 0	0 1	0 3	0 0	0 0	0 1	0 2	0 1	0 0	0 0	0 0	0 0	0 0
tig00001299	1091656	G	A	0 0	0 0	0 0	0 0	0 0	0 0	0 0	0 0	0 0	0 0	0 0	0 0	0 0	0 0	0 0	0 0	0 0	0 0	0 0	0 0	0 0	0 0	0 0	0 0	0 0	0 0	0 0	0 0	0 0	0 10	0 16	4 0	0 2	0 0	0 0	0 3	0 0	0 0	0 1	0 2	0 0	0 0	0 0	0 0	0 0	0 0
tig00001299	1091661	G	A	0 0	0 0	0 0	0 0	0 0	0 0	0 0	0 0	0 0	0 0	0 0	0 0	0 0	0 0	0 0	0 0	0 0	0 0	0 0	0 0	0 0	0 0	0 0	0 0	0 0	0 0	0 0	0 0	0 0	0 9	0 16	0 4	0 2	0 0	0 0	0 3	0 0	0 0	0 1	0 2	0 0	0 0	0 0	0 0	0 0	0 0
tig00001299	1091681	ATG	TTT	0 0	0 0	0 0	0 0	0 0	0 0	0 0	0 0	0 0	0 0	0 0	0 0	0 0	0 0	0 0	0 0	0 0	0 0	0 0	0 0	0 0	0 0	0 0	0 0	0 0	0 0	0 0	0 0	0 0	0 5	0 9	0 4	0 2	0 0	0 0	0 1	0 0	0 0	0 1	0 1	0 0	0 0	0 0	0 0	0 0	0 0
tig00001299	1091688	T	C	0 0	0 0	0 0	0 0	0 0	0 0	0 0	0 0	0 0	0 0	0 0	0 0	0 0	0 0	0 0	0 0	0 0	0 0	0 0	0 0	0 0	0 0	0 0	0 0	0 0	0 0	0 0	0 0	0 0	0 5	0 10	0 4	0 0	0 0	0 0	0 0	0 0	0 0	0 1	0 1	0 0	0 0	0 0	0 0	0 0	0 0
tig00001299	1091702	G	A	0 0	0 0	0 0	0 0	0 0	0 0	0 0	0 0	0 0	0 0	0 0	0 0	0 0	0 0	0 0	0 0	0 0	0 0	0 0	0 0	0 0	0 0	0 0	0 0	0 0	0 0	0 0	0 0	0 0	0 4	0 8	0 4	0 0	0 0	0 0	0 0	0 0	0 0	0 1	0 0	0 0	0 0	0 0	0 0	0 0	0 0
tig00001299	1091704	T	C	0 0	0 0	0 0	0 0	0 0	0 0	0 0	0 0	0 0	0 0	0 0	0 0	0 0	0 0	0 0	0 0	0 0	0 0	0 0	0 0	0 0	0 0	0 0	0 0	0 0	0 0	0 0	0 0	0 0	0 4	0 6	0 4	0 0	0 0	0 0	0 0	0 0	0 0	0 1	0 0	0 0	0 0	0 0	0 0	0 0	0 0
tig00001299	1091710	TAG	T	0 0	0 0	0 0	0 0	0 0	0 0	0 0	0 0	0 0	0 0	0 0	0 0	0 0	0 0	0 0	0 0	0 0	0 0	0 0	0 0	0 0	0 0	0 0	0 0	0 0	0 0	0 0	0 0	0 0	3 0	6 0	3 0	0 0	0 0	0 0	0 0	0 0	0 0	0 1	0 0	0 0	0 0	0 0	0 0	0 0	0 0
tig00001299	1091740	C	A	0 0	0 0	0 0	0 0	0 0	0 0	0 0	0 0	0 0	0 0	0 0	0 0	0 0	0 0	0 0	0 0	0 0	0 0	0 0	0 0	0 0	0 0	0 0	0 0	0 0	0 0	0 0	0 0	0 0	0 2	0 6	0 2	0 0	0 0	0 0	0 0	0 0	0 0	0 1	0 0	0 0	0 0	0 0	0 0	0 0	0 0
tig00001299	1091877	C	T	0 0	0 0	0 0	0 0	0 0	0 0	0 0	0 0	0 0	0 0	0 0	0 0	0 0	0 0	0 0	0 0	0 0	0 0	0 0	0 0	0 0	0 0	0 0	0 0	0 0	0 0	0 0	0 0	0 0	0 10	0 6	0 0	0 0	0 0	0 0	0 0	0 0	0 0	0 0	0 0	0 0	0 0	0 0	0 0	0 0	0 0
tig00001299	1091889	C	T	0 0	0 0	0 0	0 0	0 0	0 0	0 0	0 0	0 0	0 0	0 0	0 0	0 0	0 0	0 0	0 0	0 0	0 0	0 0	0 0	0 0	0 0	0 0	0 0	0 0	0 0	0 0	0 0	0 0	0 10	0 6	0 0	0 0	0 0	0 0	0 0	0 0	0 0	0 0	0 0	0 0	0 0	0 0	0 0	0 0	0 0
tig00001299	1091890	G	A	0 0	0 0	0 0	0 0	0 0	0 0	0 0	0 0	0 0	0 0	0 0	0 0	0 0	0 0	0 0	0 0	0 0	0 0	0 0	0 0	0 0	0 0	0 0	0 0	0 0	0 0	0 0	0 0	0 0	0 10	0 6	0 0	0 0	0 0	0 0	0 0	0 0	0 0	0 0	0 0	0 0	0 0	0 0	0 0	0 0	0 0
tig00001299	1091928	T	C	0 0	0 0	0 0	0 0	0 0	0 0	0 0	0 0	0 0	0 0	0 0	0 0	0 0	0 0	0 0	0 0	0 0	0 0	0 0	0 0	0 0	0 0	0 0	0 0	0 0	0 0	0 0	0 0	0 0	0 8	0 2	0 0	0 0	0 0	0 0	0 0	0 0	0 0	0 0	0 0	0 0	0 0	0 0	0 0	0 0	0 0
tig00001299	1091945	T	C	0 0	0 0	0 0	0 0	0 0	0 0	0 0	0 0	0 0	0 0	0 0	0 0	0 0	0 0	0 0	0 0	0 0	0 0	0 0	0 0	0 0	0 0	0 0	0 0	0 0	0 0	0 0	0 0	0 0	3 0	1 0	0 0	0 0	0 0	0 0	0 0	0 0	0 0	0 0	0 0	0 0	0 0	0 0	0 0	0 0	0 0
tig00001299	1092030	A	G	0 0	0 0	0 0	0 0	0 0	0 0	0 0	0 0	0 0	0 0	0 0	0 0	0 0	0 0	0 0	0 0	0 0	0 0	0 0	0 0	0 0	0 0	0 0	0 0	0 0	0 0	0 0	0 0	0 0	0 0	0 0	0 0	0 0	0 0	0 0	0 0	0 0	0 0	0 0	0 0	0 0	0 0	0 0	0 0	0 0	0 0
tig00001299	1092162	C	T	0 0	0 0	0 0	0 0	0 0	0 0	0 0	0 0	0 0	0 0	0 0	0 0	0 0	0 0	0 0	0 0	0 0	0 0	0 0	0 0	0 0	0 0	0 0	0 0	0 0	0 0	0 0	0 0	0 0	0 0	0 0	0 0	0 0	0 0	0 0	0 0	0 0	0 0	0 0	0 0	0 0	0 0	0 0	0 0	0 0	0 0
tig00001299	1092177	T	C	0 0	0 0	0 0	0 0	0 1	0 0	0 0	0 1	0 1	0 0	0 0	0 0	0 0	0 0	0 0	0 0	0 0	0 0	0 0	0 0	0 0	0 0	0 0	0 0	0 0	0 0	0 0	0 0	0 0	0 0	0 1	0 0	0 0	0 0	0 0	0 0	0 0	0 0	0 0	0 0	0 0	0 0	0 0	0 0	0 0	0 0
tig00001299	1092184	C	T	0 0	0 1	0 0	0 0	0 1	0 0	0 0	0 1	0 1	0 0	0 0	0 0	0 0	0 0	0 0	0 0	0 0	0 0	0 0	0 0	0 0	0 0	0 0	0 0	0 0	0 0	0 0	0 0	0 0	0 0	0 1	0 0	0 0	0 0	0 0	0 0	0 0	0 0	0 0	0 0	0 0	0 0	0 0	0 0	0 0	0 0
tig00001299	1092198	A	T	0 0	0 1	0 0	0 0	0 1	0 0	0 0	0 1	0 1	0 0	0 0	0 0	0 0	0 0	0 0	0 0	0 0	0 0	0 0	0 0	0 0	0 1	0 0	0 0	0 0	0 0	0 0	0 0	0 0	0 0	0 1	0 0	0 0	0 0	0 0	0 0	0 0	0 0	0 0	0 0	0 0	0 0	0 0	0 0	0 0	0 0
tig00001299	1092205	T	C	0 0	0 1	0 0	0 0	0 1	0 0	0 0	0 1	0 1	0 0	0 0	0 0	0 0	0 0	0 0	0 0	0 0	0 0	0 0	0 0	0 0	0 1	0 0	0 0	0 0	0 0	0 0	0 0	0 0	0 0	0 1	0 0	0 0	0 0	0 0	0 0	0 0	0 0	0 0	0 0	0 0	0 0	0 0	0 0	0 0	0 0
tig00001299	1092232	C	A	0 0	0 0	0 0	0 0	0 0	0 0	0 0	0 0	0 0	0 0	0 0	0 0	0 0	0 0	0 0	0 0	0 0	0 0	0 0	0 0	0 0	0 0	0 0	0 0	0 0	0 0	0 0	0 0	0 0	0 0	0 0	0 0	0 0	0 0	0 0	0 0	0 0	0 0	0 0	0 0	0 0	0 0	0 0	0 0	0 0	0 0
tig00001299	1092252	ATATG	GTATA	0 0	0 0	0 0	0 0	0 0	0 0	0 0	0 1	0 0	0 0	0 0	0 0	0 0	0 0	0 0	0 0	0 0	0 0	0 0	0 0	0 0	0 0	0 0	0 0	0 0	0 0	0 0	0 0	0 0	0 0	0 0	0 0	0 0	0 0	0 0	0 0	0 0	0 0	0 0	0 0	0 0	0 0	0 0	0 0	0 0	0 0
tig00001299	1092282	T	C	0 0	0 0	0 0	0 0	0 0	0 0	0 0	0 0	0 0	0 0	0 0	0 0	0 0	0 0	0 0	0 0	0 0	0 0	0 0	0 0	0 0	0 0	0 0	0 0	0 0	0 0	0 0	0 0	0 0	0 0	0 0	0 0	0 0	0 0	0 0	0 0	0 0	0 0	0 0	0 0	0 0	0 0	0 0	0 0	0 0	0 0
tig00001299	1092305	T	A	0 0	0 0	0 0	0 0	0 0	0 0	0 0	0 0	0 0	0 0	0 0	0 0	0 0	0 0	0 0	0 0	0 0	0 0	0 0	0 0	0 0	0 0	0 0	0 0	0 0	0 0	0 0	0 0	0 0	0 0	0 0	0 0	0 0	0 0	0 0	0 0	0 0	0 0	0 0	0 0	0 0	0 0	0 0	0 0	0 0	0 0
tig00001299	1092315	A	T	0 0	0 0	0 0	0 0	0 0	0 0	0 0	0 0	0 0	0 0	0 0	0 0	0 0	0 0	0 0	0 0	0 0	0 0	0 0	0 0	0 0	0 0	0 0	0 0	0 0	0 0	0 0	0 0	0 0	0 0	0 0	0 0	0 0	0 0	0 0	0 0	0 0	0 0	0 0	0 0	0 0	0 0	0 0	0 0	0 0	0 0
tig00001299	1092339	T	G	0 0	0 0	0 0	0 0	0 0	0 0	0 0	0 0	0 0	0 0	0 0	0 0	0 0	0 0	0 0	0 0	0 0	0 0	0 0	0 0	0 0	0 0	0 0	0 0	0 0	0 0	0 0	0 0	0 0	0 0	0 0	0 0	0 0	0 0	0 0	0 0	0 0	0 0	0 0	0 0	0 0	0 0	0 0	0 0	0 0	0 0
tig00001299	1092348	C	CT	0 0	0 0	0 0	0 0	0 0	0 0	0 0	0 0	0 0	0 0	0 0	0 0	0 0	0 0	0 0	0 0	0 0	0 0	0 0	0 0	0 0	0 0	0 0	0 0	0 0	0 0	0 0	0 0	0 0	0 0	0 0	0 0	0 0	0 0	0 0	0 0	0 0	0 0	0 0	0 0	0 0	0 0	0 0	0 0	0 0	0 0
tig00001299	1092351	TTTTTTTC	CTTTTTTTTAA	0 0	0 0	0 0	0 0	0 0	0 0	0 0	0 0	0 0	0 0	0 0	0 0	0 0	0 0	0 0	0 0	0 0	0 0	0 0	0 0	0 0	0 0	0 0	0 0	0 0	0 0	0 0	0 0	0 0	0 0	0 0	0 0	0 0	0 0	0 0	0 0	0 0	0 0	0 0	0 0	0 0	0 0	0 0	0 0	0 0	0 0
tig00001299	1092509	C	A	0 0	0 0	0 0	0 0	0 0	0 0	0 0	0 0	0 0	0 0	0 0	0 0	0 0	0 0	0 0	0 0	0 0	0 0	0 0	0 0	0 0	0 0	0 0	0 0	0 0	0 0	0 0	0 0	0 0	0 0	0 0	0 0	0 0	0 0	0 0	0 0	0 0	0 0	0 0	0 0	0 0	0 0	0 0	0 0	0 0	0 0
tig00001299	1092523	G	A	0 0	0 0	0 0	0 0	0 0	0 0	0 0	0 0	0 0	0 0	0 0	0 0	0 0	0 0	0 0	0 0	0 0	0 0	0 0	0 0	0 0	0 0	0 0	0 0	0 0	0 0	0 0	0 0	0 0	0 0	0 2	0 0	0 0	0 0	0 0	0 0	0 0	0 0	0 0	0 0	0 0	0 0	0 0	0 0	0 0	0 0
tig00001299	1092530	C	T	0 0	0 0	0 0	0 0	0 0	0 0	0 0	0 0	0 0	0 0	0 0	0 0	0 0	0 0	0 0	0 0	0 0	0 0	0 0	0 0	0 0	0 0	0 0	0 0	0 0	0 0	0 0	0 0	0 0	0 1	0 2	0 0	0 0	0 0	0 0	0 0	0 0	0 0	0 0	0 0	0 0	0 2	0 0	0 0	0 0	0 0
tig00001299	1092538	TAAATTTATACTTGAAG	T	0 0	0 0	0 0	0 0	0 0	0 0	0 0	0 0	0 0	0 0	0 0	0 0	0 0	0 0	0 0	0 0	0 0	0 0	0 0	0 0	0 0	0 0	0 0	0 0	0 0	0 0	0 0	0 0	0 0	0 2	0 3	0 0	0 0	0 0	0 0	0 0	0 0	0 0	0 0	0 0	0 0	0 0	0 0	0 0	0 0	0 0
tig00001299	1092550	T	A	0 0	0 0	0 0	0 0	0 0	0 0	0 0	0 0	0 0	0 0	0 0	0 0	0 0	0 0	0 0	0 0	0 0	0 0	0 0	0 0	0 0	0 0	0 0	0 0	0 0	0 0	0 0	0 0	0 0	0 2	0 3	0 0	0 0	0 0	0 0	0 0	0 0	0 0	0 0	0 0	0 0	2 0	0 0	0 0	0 0	0 0
tig00001299	1092564	A	C	0 0	0 0	0 0	0 0	0 0	0 0	0 0	0 0	0 0	0 0	0 0	0 0	0 0	0 0	0 0	0 0	0 0	0 0	0 0	0 0	0 0	0 0	0 0	0 0	0 0	0 0	0 0	0 0	0 0	0 3	0 4	0 0	0 0	0 0	0 0	0 0	0 0	0 0	0 0	0 0	0 0	0 2	0 0	0 1	0 0	0 0
tig00001299	1092578	A	T	0 0	0 0	0 0	0 0	0 0	0 0	0 0	0 0	0 0	0 0	0 0	0 0	0 0	0 0	0 0	0 0	0 0	0 0	0 0	0 0	0 0	0 0	0 0	0 0	0 0	0 0	0 0	0 0	0 0	0 3	0 4	0 0	0 0	0 0	0 0	0 0	0 0	0 0	0 0	0 0	0 0	0 2	0 0	0 1	0 0	0 0
tig00001299	1092584	A	G	0 0	0 0	0 0	0 0	0 0	0 0	0 0	0 0	0 0	0 0	0 0	0 0	0 0	0 0	0 0	0 0	0 0	0 0	0 0	0 0	0 0	0 0	0 0	0 0	0 0	0 0	0 0	0 0	0 0	0 3	0 4	0 0	0 0	0 0	0 0	0 0	0 0	0 0	0 0	0 0	0 0	0 2	0 0	0 1	0 0	0 0
tig00001299	1092630	A	G	0 0	0 0	0 0	0 0	0 0	0 0	0 0	0 0	0 0	0 0	0 0	0 0	0 0	0 0	0 0	0 0	0 0	0 0	0 0	0 0	0 0	0 0	0 0	0 0	0 0	0 0	0 0	0 0	0 0	0 1	0 0	0 0	0 0	0 0	1 0	0 1	0 0	0 0	0 1	0 0	1 0	2 0	0 0	1 0	0 3	0 0
tig00001299	1092635	C	G	0 0	0 0	0 0	0 0	0 0	0 0	0 0	0 0	0 0	0 0	0 0	0 0	0 0	0 0	0 0	0 0	0 0	0 0	0 0	0 0	0 0	0 0	0 0	0 0	0 0	0 0	0 0	0 0	0 0	0 1	0 0	0 0	0 0	0 1	0 1	0 1	0 0	0 0	0 1	0 0	0 1	0 4	0 0	0 1	0 3	0 0
tig00001299	1092640	C	A	0 0	0 0	0 0	0 0	0 0	0 0	0 0	0 0	0 0	0 0	0 0	0 0	0 0	0 0	0 0	0 0	0 0	0 0	0 0	0 0	0 0	0 0	0 0	0 0	0 0	0 0	0 0	0 0	0 0	0 1	0 0	0 0	0 0	1 0	0 1	0 1	0 0	0 0	2 0	0 0	0 1	0 4	0 0	0 1	3 0	0 0
tig00001299	1092644	TA	T	0 0	0 0	0 0	0 0	0 0	0 0	0 0	0 0	0 0	0 0	0 0	0 0	0 0	0 0	0 0	0 0	0 0	0 0	0 0	0 0	0 0	0 0	0 0	0 0	0 0	0 0	0 0	0 0	0 0	0 0	0 0	0 0	0 0	0 1	0 1	0 1	0 0	0 0	0 2	0 0	0 1	0 4	0 0	0 1	0 3	0 0
tig00001299	1092646	G	T	0 0	0 0	0 0	0 0	0 0	0 0	0 0	0 0	0 0	0 0	0 0	0 0	0 0	0 0	0 0	0 0	0 0	0 0	0 0	0 0	0 0	0 0	0 0	0 0	0 0	0 0	0 0	0 0	0 0	0 0	0 0	0 0	0 0	0 1	0 1	0 1	0 0	0 0	0 2	0 0	0 1	0 4	0 0	0 1	0 3	0 0
tig00001299	1092651	A	C	0 0	0 0	0 0	0 0	0 0	0 0	0 0	0 0	0 0	0 0	0 0	0 0	0 0	0 0	0 0	0 0	0 0	0 0	0 0	0 0	0 0	0 0	0 0	0 0	0 0	0 0	0 0	0 0	0 0	0 0	0 0	0 0	0 0	0 1	0 1	0 1	0 0	0 0	0 2	0 0	0 1	0 4	0 0	0 1	0 3	0 0
tig00001299	1092661	A	T	0 0	0 0	0 0	0 0	0 0	0 0	0 0	0 0	0 0	0 0	0 0	0 0	0 0	0 0	0 0	0 0	0 0	0 0	0 0	0 0	0 0	0 0	0 0	0 0	0 0	0 0	0 0	0 0	0 0	0 0	0 0	0 0	0 0	0 1	0 1	0 1	0 0	0 0	0 1	0 0	0 1	0 7	0 0	0 1	0 3	0 0
tig00001299	1092669	C	A	0 0	0 0	0 0	0 0	0 0	0 0	0 0	0 0	0 0	0 0	0 0	0 0	0 0	0 0	0 0	0 0	0 0	0 0	0 0	0 0	0 0	0 0	0 0	0 0	0 0	0 0	0 0	0 0	0 0	0 0	0 0	0 0	0 0	0 1	0 1	0 1	0 0	0 0	0 2	0 0	0 1	0 7	0 0	0 1	0 3	0 0
tig00001299	1092693	A	T	0 0	0 0	0 0	0 0	0 0	0 0	0 0	0 0	0 0	0 0	0 0	0 0	0 0	0 0	0 0	0 0	0 0	0 0	0 0	0 0	0 0	0 0	0 0	0 0	0 0	0 0	0 0	0 0	0 0	0 0	0 0	0 0	0 0	0 0	0 1	0 1	0 0	0 0	0 2	0 0	0 2	0 5	0 2	0 1	0 3	0 0
tig00001299	1092700	G	C	0 0	0 0	0 0	0 0	0 0	0 0	0 0	0 0	0 0	0 0	0 0	0 0	0 0	0 0	0 0	0 0	0 0	0 0	0 0	0 0	0 0	0 0	0 0	0 0	0 0	0 0	0 0	0 0	0 0	0 0	0 0	0 0	0 0	0 0	0 2	0 1	0 0	0 0	0 2	0 0	0 2	0 5	0 2	0 1	0 3	0 0
tig00001299	1092714	T	C	0 0	0 0	0 0	0 0	0 0	0 0	0 0	0 0	0 0	0 0	0 0	0 0	0 0	0 0	0 0	0 0	0 0	0 0	0 0	0 0	0 0	0 0	0 0	0 0	0 0	0 0	0 0	0 0	0 0	0 0	0 0	0 0	1 0	0 0	3 0	1 0	2 0	2 0	2 0	0 0	6 0	6 0	4 0	0 0	4 0	0 0
tig00001299	1092722	A	G	0 0	0 0	0 0	0 0	0 0	0 0	0 0	0 0	0 0	0 0	0 0	0 0	0 0	0 0	0 0	0 0	0 0	0 0	0 0	0 0	0 0	0 0	0 0	0 0	0 0	0 0	0 0	0 0	0 0	0 0	0 0	0 0	0 1	0 1	0 3	0 1	0 2	0 2	0 2	0 0	0 6	0 6	0 4	0 1	0 4	0 0
tig00001299	1092724	T	A	0 0	0 0	0 0	0 0	0 0	0 0	0 0	0 0	0 0	0 0	0 0	0 0	0 0	0 0	0 0	0 0	0 0	0 0	0 0	0 0	0 0	0 0	0 0	0 0	0 0	0 0	0 0	0 0	0 0	0 0	0 0	0 0	0 1	0 1	0 3	0 1	0 2	0 2	0 2	0 0	0 6	0 6	0 4	0 1	0 4	0 0
tig00001299	1092733	A	T	0 0	0 0	0 0	0 0	0 0	0 0	0 0	0 0	0 0	0 0	0 0	0 0	0 0	0 0	0 0	0 0	0 0	0 0	0 0	0 0	0 0	0 0	0 0	0 0	0 0	0 0	0 0	0 0	0 0	0 0	0 0	0 0	0 1	0 1	2 1	0 1	2 0	2 0	0 2	0 0	4 3	0 6	3 1	1 0	0 4	0 0
tig00001299	1092740	GA	G	0 0	0 0	0 0	0 0	0 0	0 0	0 0	0 0	0 0	0 0	0 0	0 0	0 0	0 0	0 0	0 0	0 0	0 0	0 0	0 0	0 0	0 0	0 0	0 0	0 0	0 0	0 0	0 0	0 0	0 0	0 0	0 0	0 1	0 1	0 2	0 0	0 2	0 3	0 3	0 0	0 6	0 7	0 5	0 2	0 1	0 1
tig00001299	1092769	T	C	0 0	0 0	0 0	0 0	0 0	0 0	0 0	0 0	0 0	0 0	0 0	0 0	0 0	0 0	0 0	0 0	0 0	0 0	0 0	0 0	0 0	0 0	0 0	0 0	0 0	0 0	0 0	0 0	0 0	0 0	0 0	0 0	0 1	0 2	1 2	0 0	2 1	3 0	0 2	0 0	5 2	0 9	5 3	2 0	0 2	0 2
tig00001299	1092775	A	T	0 0	0 0	0 0	0 0	0 0	0 0	0 0	0 0	0 0	0 0	0 0	0 0	0 0	0 0	0 0	0 0	0 0	0 0	0 0	0 0	0 0	0 0	0 0	0 0	0 0	0 0	0 0	0 0	0 0	0 0	0 0	0 0	0 1	0 2	0 3	0 0	0 4	0 3	0 2	0 0	0 7	0 10	0 8	0 2	0 3	0 2
tig00001299	1092837	A	G	0 2	0 4	0 2	0 0	0 2	0 2	0 4	0 0	0 2	0 3	0 3	0 2	0 2	0 2	0 0	0 1	0 1	0 1	0 2	0 0	0 4	0 0	0 1	0 1	0 0	0 0	0 2	0 0	0 0	0 0	0 0	0 0	0 2	0 3	5 2	0 0	4 1	11 0	0 5	0 1	9 7	0 13	10 5	9 1	0 14	0 6
tig00001299	1092851	T	G	3 0	7 0	6 0	2 0	2 0	9 0	4 0	2 0	2 0	6 0	6 0	2 0	3 0	7 0	0 0	3 0	2 0	2 0	3 0	0 0	4 0	3 0	2 0	5 0	0 0	1 0	3 0	0 0	0 2	1 0	0 0	0 0	0 2	0 2	0 7	0 0	0 4	0 11	0 6	0 2	0 18	0 13	0 19	0 11	0 15	0 9
tig00001299	1092866	A	G	0 8	0 15	0 9	0 3	0 5	0 24	0 8	0 8	0 5	0 15	0 17	0 2	0 8	0 13	0 1	0 6	0 4	0 4	0 6	0 0	0 10	0 6	0 3	0 8	0 1	0 1	0 4	0 0	0 6	0 1	0 1	0 0	0 1	0 1	0 8	0 2	0 2	0 11	0 8	0 2	0 15	0 14	0 17	0 11	0 17	0 10
tig00001299	1092866	A	T	0 8	0 15	0 9	0 3	0 5	0 24	0 8	0 8	0 5	0 15	0 17	0 2	0 8	0 13	0 1	0 6	0 4	0 4	0 6	0 0	0 10	0 6	0 3	0 8	0 1	0 1	0 4	0 0	0 6	0 1	0 1	0 0	0 1	0 1	0 8	0 2	0 2	0 11	0 8	0 2	0 15	0 14	0 17	0 11	0 17	0 10
tig00001299	1092881	C	A	0 11	0 20	0 15	0 4	0 6	0 31	0 15	0 8	0 7	0 24	0 26	0 2	0 15	0 20	0 1	0 9	0 6	0 6	0 6	0 1	0 20	0 10	0 5	0 12	0 3	0 1	0 4	0 1	0 10	0 1	0 2	0 0	0 1	0 1	0 8	0 2	0 4	0 13	0 8	0 2	0 15	0 15	0 21	0 11	0 18	0 10
tig00001299	1092893	TAATTTTTTTTTTTCTA	ATTTTTTTTTTTCTG	0 0	0 0	0 0	0 0	0 0	0 0	0 0	0 0	0 0	0 0	0 0	0 0	0 0	0 0	0 0	0 0	0 0	0 0	0 0	0 0	0 0	0 0	0 0	0 0	0 0	0 0	0 0	0 0	0 0	0 0	0 0	0 0	0 0	0 0	0 1	0 1	0 0	0 0	0 1	0 0	0 0	0 0	0 0	0 0	0 18	0 0
tig00001299	1092895	AT	A	0 0	0 0	0 0	0 0	0 0	0 0	0 0	0 0	0 0	0 0	0 0	0 0	0 0	0 0	0 0	0 0	0 0	1 0	0 0	0 0	0 0	0 0	0 0	0 0	0 0	0 0	0 0	0 0	0 0	1 0	2 0	0 0	1 0	0 0	0 1	1 1	0 0	0 0	3 1	3 0	0 0	0 0	3 0	1 0	0 18	7 0
tig00001299	1092895	ATT	A	3 0	4 0	8 0	0 0	2 0	7 0	4 0	1 0	2 0	13 0	7 0	1 0	5 0	16 0	2 0	2 0	1 0	0 0	1 0	0 0	5 0	9 0	1 0	0 0	2 0	0 0	2 0	1 0	3 0	0 0	0 0	0 0	0 0	0 0	0 1	0 1	0 0	0 0	2 1	0 0	0 0	0 0	0 0	0 0	0 18	0 0
tig00001299	1092895	A	AT	0 0	0 0	0 0	0 0	0 0	0 0	0 0	0 0	0 0	0 0	0 0	0 0	0 0	0 0	0 0	0 0	0 0	0 0	0 0	0 0	0 0	0 0	0 0	0 0	0 0	0 0	0 0	0 0	0 0	0 0	0 0	0 0	0 0	0 0	0 1	0 1	0 0	0 0	0 1	0 0	0 0	0 0	0 0	0 0	0 18	0 0
tig00001299	1092906	T	C	0 0	0 0	0 0	0 0	0 0	0 0	0 0	0 0	0 0	0 0	0 0	0 0	0 0	0 0	0 0	0 0	0 0	0 0	0 0	0 0	0 0	0 0	0 0	0 0	0 0	0 0	0 0	0 0	0 0	0 0	0 0	0 0	0 0	0 0	3 1	0 1	3 0	13 0	0 1	0 0	6 0	0 0	15 0	9 0	0 18	0 0
tig00001299	1092906	TCTA	CCTG	0 0	0 0	0 0	0 0	0 0	0 0	0 0	0 0	0 0	0 0	0 0	0 0	0 0	0 0	0 0	0 0	0 0	0 0	0 0	0 0	0 0	0 0	0 0	0 0	0 0	0 0	0 0	0 0	6 0	0 0	0 0	0 0	0 0	0 0	0 1	0 1	0 0	0 0	0 1	0 0	8 0	11 0	0 0	0 0	0 18	0 0
tig00001299	1092929	G	T	0 33	0 39	0 40	0 8	0 14	0 47	0 24	0 26	0 18	0 48	0 46	0 19	0 32	0 63	0 5	0 13	0 15	0 13	0 14	0 5	0 37	0 41	0 7	0 19	0 8	0 1	0 13	0 10	0 17	0 11	0 12	0 0	0 4	0 3	0 11	0 6	0 4	0 21	0 11	0 4	0 20	0 18	0 24	0 17	0 17	0 12
tig00001299	1092930	A	G	0 33	0 39	0 40	0 7	0 14	0 47	0 24	0 26	0 18	0 48	0 46	0 19	0 32	0 64	0 5	0 13	0 15	0 13	0 14	0 5	0 37	0 42	0 7	0 18	0 8	0 1	0 13	0 10	0 17	0 11	0 12	0 0	0 4	0 4	0 12	0 6	0 5	0 20	0 12	0 4	0 20	0 18	0 27	0 17	0 19	0 12
tig00001299	1092940	T	A	0 31	0 35	0 37	0 7	0 12	0 45	0 20	0 26	0 15	0 45	0 42	0 17	0 29	0 61	0 5	0 12	0 13	0 12	0 12	0 5	0 33	0 42	0 6	0 18	0 8	0 2	0 10	0 10	0 17	0 10	0 12	0 0	0 4	0 4	0 10	0 7	0 5	0 22	0 13	0 4	0 18	0 18	0 25	0 16	0 18	0 13
tig00001299	1092959	G	A	0 28	0 28	0 33	0 5	0 11	0 28	0 16	0 20	0 15	0 39	0 33	0 17	0 24	0 53	0 4	0 8	0 13	0 11	0 10	0 5	0 29	0 39	0 4	0 12	0 8	0 1	0 9	0 9	0 12	0 9	0 11	0 0	0 4	0 3	0 6	0 8	0 6	0 19	0 15	0 4	0 16	0 14	0 32	0 16	0 15	0 14
tig00001299	1092967	A	G	0 24	0 26	0 31	0 5	0 9	0 23	0 15	0 19	0 12	0 34	0 30	0 17	0 23	0 47	0 4	0 7	0 9	0 9	0 8	0 5	0 27	0 38	0 4	0 11	0 7	0 1	0 9	0 9	0 10	0 9	0 10	0 0	0 4	0 4	0 8	0 8	0 6	0 18	0 15	0 4	0 13	0 13	0 31	0 15	0 12	0 15
tig00001299	1092973	T	A	0 24	0 21	0 30	0 5	0 9	0 20	0 13	0 18	0 11	0 31	0 23	0 17	0 20	0 46	0 4	0 5	0 8	0 7	0 8	0 4	0 25	0 34	0 4	0 8	0 7	0 1	0 9	0 8	0 10	0 9	0 10	0 0	0 4	0 4	0 8	0 8	0 5	0 17	0 14	0 4	0 13	0 13	0 30	0 15	0 12	0 14
tig00001299	1092973	T	C	0 24	0 21	0 30	0 5	0 9	0 20	0 13	0 18	0 11	0 31	0 23	0 17	0 20	0 46	0 4	0 5	0 8	0 7	0 8	0 4	0 25	0 34	0 4	0 8	0 7	0 1	0 9	0 8	0 10	0 9	0 10	0 0	0 4	0 4	0 8	0 8	0 5	0 17	0 14	0 4	0 13	0 13	0 30	0 15	0 12	0 14
tig00001299	1093003	A	T	10 0	13 0	14 0	3 0	6 0	7 0	4 0	9 0	6 0	10 0	12 0	8 0	10 0	16 0	1 0	2 0	4 0	4 0	4 0	4 0	9 0	18 0	1 0	4 0	2 0	0 0	4 0	4 0	3 0	4 0	3 0	0 0	3 0	4 0	6 0	6 0	6 0	18 0	9 0	2 0	11 0	9 0	21 0	8 0	10 0	8 0
tig00001299	1093039	G	A	0 0	0 0	0 0	0 0	0 0	0 0	0 0	0 0	0 0	0 0	0 0	0 0	0 0	0 0	0 0	0 0	0 0	0 0	0 0	0 0	0 0	0 0	0 0	0 0	0 0	0 0	0 0	0 0	0 0	0 0	0 0	0 0	0 3	0 3	0 3	0 5	0 3	0 13	0 8	0 2	0 8	0 10	0 15	0 7	0 12	0 8
tig00001299	1093086	A	T	0 0	0 0	0 0	0 0	0 0	0 0	0 0	0 0	0 0	0 0	0 0	0 0	0 0	0 0	0 0	0 0	0 0	0 0	0 0	0 0	0 0	0 0	0 0	0 0	0 0	0 0	0 0	0 0	0 0	0 0	0 0	0 0	0 0	0 0	0 1	0 2	0 2	0 7	0 4	0 0	0 3	0 3	0 9	0 1	0 8	0 4
tig00001299	1093089	G	A	0 0	0 0	0 0	0 0	0 0	0 0	0 0	0 0	0 0	0 0	0 0	0 0	0 0	0 0	0 0	0 0	0 0	0 0	0 0	0 0	0 0	0 0	0 0	0 0	0 0	0 0	0 0	0 0	0 0	0 0	0 0	0 0	0 0	0 0	0 1	0 2	0 2	0 7	0 4	0 0	0 3	0 3	0 9	0 1	0 8	0 3
tig00001299	1093092	T	G	0 0	0 0	0 0	0 0	0 0	0 0	0 0	0 0	0 0	0 0	0 0	0 0	0 0	0 0	0 0	0 0	0 0	0 0	0 0	0 0	0 0	0 0	0 0	0 0	0 0	0 0	0 0	0 0	0 0	0 0	0 0	0 0	0 0	0 0	0 1	0 1	0 2	0 6	0 4	0 0	0 4	0 3	0 8	0 1	0 8	0 3
tig00001299	1093094	C	T	0 0	0 0	0 0	0 0	0 0	0 0	0 0	0 0	0 0	0 0	0 0	0 0	0 0	0 0	0 0	0 0	0 0	0 0	0 0	0 0	0 0	0 0	0 0	0 0	0 0	0 0	0 0	0 0	0 0	0 0	0 0	0 0	0 0	0 0	0 1	0 1	0 2	0 6	0 3	0 0	0 4	0 3	0 8	0 1	0 8	0 3
tig00001299	1093102	C	T	0 0	0 0	0 0	0 0	0 0	0 0	0 0	0 0	0 0	0 0	0 0	0 0	0 0	0 0	0 0	0 0	0 0	0 0	0 0	0 0	0 0	0 0	0 0	0 0	0 0	0 0	0 0	0 0	0 0	0 0	0 0	0 0	0 0	0 0	0 1	0 1	0 1	0 4	0 3	0 0	0 3	0 3	0 5	0 1	0 7	0 1
tig00001299	1093122	AAA	TAAAG	0 0	0 0	0 0	0 0	0 0	0 0	0 0	0 0	0 0	0 0	0 0	0 0	0 0	0 0	0 0	0 0	0 0	0 0	0 0	0 0	0 0	0 0	0 0	0 0	0 0	0 0	0 0	0 0	0 0	0 0	0 0	0 0	0 0	0 0	0 0	0 0	0 0	0 4	0 2	0 0	0 2	0 3	0 2	0 1	0 6	0 0
tig00001299	1093125	TCAT	AAGTCAA	0 0	0 0	0 0	0 0	0 0	0 0	0 0	0 0	0 0	0 0	0 0	0 0	0 0	0 0	0 0	0 0	0 0	0 0	0 0	0 0	0 0	0 0	0 0	0 0	0 0	0 0	0 0	0 0	0 0	0 0	0 0	0 0	0 0	0 0	0 0	0 0	0 0	0 4	0 2	0 0	0 2	0 3	0 2	0 1	0 6	0 0
tig00001299	1093130	A	T	0 0	0 0	0 0	0 0	0 0	0 0	0 0	0 0	0 0	0 0	0 0	0 0	0 0	0 0	0 0	0 0	0 0	0 0	0 0	0 0	0 0	0 0	0 0	0 0	0 0	0 0	0 0	0 0	0 0	0 0	0 0	0 0	0 0	0 0	0 0	0 0	0 0	4 0	0 2	0 0	2 0	3 0	1 1	1 0	0 7	0 0
tig00001299	1093133	G	GA	0 0	0 0	0 0	0 0	0 0	0 0	0 0	0 0	0 0	0 0	0 0	0 0	0 0	0 0	0 0	0 0	0 0	0 0	0 0	0 0	0 0	0 0	0 0	0 0	0 0	0 0	0 0	0 0	0 0	0 0	0 0	0 0	0 0	0 0	0 0	0 0	0 0	0 3	0 2	0 0	0 1	0 2	0 2	0 0	0 7	0 0
tig00001299	1093165	C	T	0 0	0 0	0 0	0 0	0 0	0 0	0 0	0 0	0 0	0 0	0 0	0 0	0 0	0 0	0 0	0 0	0 0	0 0	0 0	0 0	0 0	0 0	0 0	0 0	0 0	0 0	0 0	0 0	0 0	0 0	0 0	0 0	0 0	0 0	0 0	0 0	0 0	2 0	1 0	0 0	2 0	2 0	1 0	0 0	2 0	0 0
tig00001299	1093171	A	G	0 0	0 0	0 0	0 0	0 0	0 0	0 0	0 0	0 0	0 0	0 0	0 0	0 0	0 0	0 0	0 0	0 0	0 0	0 0	0 0	0 0	0 0	0 0	0 0	0 0	0 0	0 0	0 0	0 0	0 0	0 0	0 0	0 0	0 0	0 0	0 0	0 0	0 3	0 1	0 0	0 2	0 2	0 0	0 0	0 2	0 0
tig00001299	1093177	A	C	0 0	0 0	0 0	0 0	0 0	0 0	0 0	0 0	0 0	0 0	0 0	0 0	0 0	0 0	0 0	0 0	0 0	0 0	0 0	0 0	0 0	0 0	0 0	0 0	0 0	0 0	0 0	0 0	0 0	0 0	0 0	0 0	0 0	0 0	0 0	0 0	0 0	3 0	0 1	0 0	2 0	2 0	0 0	0 0	0 2	0 0
tig00001299	1093238	C	T	0 9	0 14	0 6	0 0	0 5	0 12	0 1	0 8	0 4	0 10	0 9	0 8	0 8	0 8	0 0	0 3	0 1	0 1	0 5	0 4	0 13	0 11	0 2	0 1	0 2	0 2	0 2	0 4	0 2	0 0	0 2	0 0	0 0	0 0	0 0	0 0	0 0	0 2	0 1	0 0	0 2	0 0	0 0	0 0	0 1	0 0
tig00001299	1093243	CTCG	C	0 13	0 18	0 6	0 0	0 5	0 14	0 1	0 10	0 7	0 12	0 10	0 9	0 9	0 10	0 0	0 5	0 1	0 1	0 9	0 4	0 14	0 13	0 2	0 1	0 2	0 2	0 3	0 5	0 3	0 0	0 2	0 0	0 0	0 0	0 0	0 0	0 0	0 2	0 0	0 0	0 1	0 0	0 0	0 0	0 1	0 0
tig00001299	1093264	C	T	0 23	0 23	0 11	0 4	0 10	0 30	0 5	0 20	0 14	0 24	0 18	0 11	0 26	0 23	0 1	0 9	0 3	0 7	0 14	0 12	0 31	0 24	0 6	0 5	0 3	0 5	0 9	0 7	0 4	0 2	0 5	0 0	0 0	0 0	0 0	0 0	0 0	0 2	0 0	0 0	0 1	0 0	0 0	0 0	0 1	0 0
tig00001299	1093273	TAA	CAG	0 0	0 0	0 0	0 0	0 0	0 0	0 0	0 0	0 0	0 0	0 0	0 0	0 0	0 0	0 0	0 0	0 0	0 0	0 0	0 0	0 0	0 0	0 0	0 0	0 0	0 0	0 0	0 0	0 0	0 1	0 0	0 0	0 0	0 0	0 0	0 0	0 0	0 2	0 0	0 0	0 1	0 0	0 0	0 0	0 1	0 0
tig00001299	1093275	A	G	27 0	29 0	18 0	6 0	16 0	31 0	6 0	23 0	15 0	30 0	24 0	12 0	28 0	29 0	1 0	10 0	5 0	9 0	14 0	11 0	37 0	29 0	6 0	7 0	6 0	5 0	9 0	7 0	4 0	2 1	6 0	0 0	0 0	0 0	0 0	0 0	0 0	0 2	0 0	0 0	0 1	0 0	0 0	0 0	0 1	0 0
tig00001299	1093281	T	A	0 28	0 33	0 19	0 7	0 17	0 32	0 10	0 25	0 18	0 30	0 26	0 12	0 32	0 35	0 1	0 11	0 5	0 10	0 14	0 12	0 40	0 31	0 6	0 8	0 6	0 6	0 10	0 7	0 5	0 4	0 8	0 0	0 0	0 0	0 0	0 0	0 0	0 2	0 0	0 0	0 1	0 0	0 0	0 0	0 0	0 0
tig00001299	1093318	T	C	0 29	0 35	0 21	0 7	0 17	0 33	0 11	0 26	0 20	0 31	0 25	0 13	0 32	0 36	0 1	0 11	0 5	0 10	0 14	0 12	0 40	0 31	0 6	0 8	0 6	0 6	0 12	0 7	0 5	2 4	0 12	0 0	0 0	0 0	0 0	0 0	0 0	1 0	0 0	0 0	0 0	0 0	0 0	0 0	0 0	0 0
tig00001299	1093331	GAA	G	0 19	0 19	0 16	0 7	0 12	0 21	0 10	0 18	0 12	0 20	0 17	0 4	0 22	0 23	0 1	0 8	0 4	0 7	0 7	0 7	0 25	0 19	0 4	0 7	0 4	0 4	0 8	0 3	0 3	0 4	0 8	0 0	0 0	0 0	0 0	0 0	0 0	0 0	0 0	0 0	0 0	0 0	0 0	0 0	0 0	0 0
tig00001299	1093343	G	A	0 17	0 17	0 16	0 7	0 12	0 19	0 9	0 16	0 10	0 19	0 16	0 3	0 22	0 23	0 1	0 6	0 4	0 7	0 5	0 7	0 25	0 17	0 4	0 7	0 4	0 4	0 8	0 2	0 2	0 4	0 7	0 0	0 0	0 0	0 0	0 0	0 0	0 0	0 0	0 0	0 0	0 0	0 0	0 0	0 0	0 0
tig00001299	1093366	C	A	0 5	0 7	0 8	0 3	0 7	0 1	0 6	0 5	0 4	0 3	0 5	0 1	0 4	0 9	0 0	0 2	0 2	0 1	0 0	0 0	0 7	0 5	0 0	0 3	0 2	0 1	0 1	0 0	0 1	0 3	0 6	0 0	0 0	0 0	0 0	0 0	0 0	0 0	0 0	0 0	0 0	0 0	0 0	0 0	0 0	0 0
tig00001299	1093372	G	A	0 0	0 0	0 0	0 0	0 0	0 0	0 0	0 0	0 0	0 0	0 0	0 0	0 0	0 0	0 0	0 0	0 0	0 0	0 0	0 0	0 0	0 0	0 0	0 0	0 0	0 0	0 0	0 0	0 0	2 0	4 0	0 0	0 0	0 0	0 0	0 0	0 0	0 0	0 0	0 0	0 0	0 0	0 0	0 0	0 0	0 0
tig00001299	1093543	C	T	0 0	0 0	0 0	0 0	0 0	0 0	0 0	0 0	0 0	0 0	0 0	0 0	0 0	0 0	0 0	0 0	0 0	0 0	0 0	0 0	0 0	0 0	0 0	0 0	0 0	0 0	0 0	0 0	0 0	0 0	0 0	0 0	0 0	0 0	0 0	0 0	0 0	0 0	0 0	0 0	0 0	0 0	0 0	0 0	0 0	0 0
tig00001299	1093592	G	A	0 0	0 0	0 0	0 0	0 0	0 0	0 0	0 0	0 0	0 0	0 0	0 0	0 0	0 0	0 0	0 0	0 0	0 0	0 0	0 0	0 0	0 0	0 0	0 0	0 0	0 0	0 0	0 0	0 0	6 0	4 0	0 0	0 0	0 0	0 0	0 0	0 0	0 0	0 0	0 0	0 0	0 0	0 0	0 0	0 0	0 0
tig00001299	1093600	A	G	0 0	0 0	0 0	0 0	0 0	0 0	0 0	0 0	0 0	0 0	0 0	0 0	0 0	0 0	0 0	0 0	0 0	0 0	0 0	0 0	0 0	0 0	0 0	0 0	0 0	0 0	0 0	0 0	0 0	0 9	0 8	0 0	0 0	0 0	0 0	0 0	0 0	0 0	0 0	0 0	0 0	0 0	0 0	0 0	0 0	0 0
tig00001299	1093600	ACATG	GCATC	0 0	0 0	0 0	0 0	0 0	0 0	0 0	0 0	0 0	0 0	0 0	0 0	0 0	0 0	0 0	0 0	0 0	0 0	0 0	0 0	0 0	0 0	0 0	0 0	0 0	0 0	0 0	0 0	0 0	0 9	0 8	0 0	0 0	0 0	0 0	0 0	0 0	0 0	0 0	0 0	0 0	0 0	0 0	0 0	0 0	0 0
tig00001299	1093674	G	A	0 0	0 0	0 0	0 0	0 0	0 0	0 0	0 0	0 0	0 0	0 0	0 0	0 0	0 0	0 0	0 0	0 0	0 0	0 0	0 0	0 0	0 0	0 0	0 0	0 0	0 0	0 0	0 0	0 0	0 19	0 18	0 0	0 0	0 0	0 0	0 0	0 0	0 0	0 0	0 0	0 1	0 4	0 0	0 0	0 0	0 0
tig00001299	1093697	T	C	0 0	0 0	0 0	0 0	0 0	0 0	0 0	0 0	0 0	0 0	0 0	0 0	0 0	0 0	0 0	0 0	0 0	0 0	0 0	0 0	0 0	0 0	0 0	0 0	0 0	0 0	0 0	0 0	0 0	0 12	0 9	0 0	0 0	0 0	0 0	0 0	0 0	0 0	0 0	0 0	0 1	0 4	0 0	0 0	0 0	0 0
tig00001299	1093756	G	A	0 0	0 0	0 0	0 0	0 0	0 0	0 0	0 0	0 0	0 0	0 0	0 0	0 0	0 0	0 0	0 0	0 0	0 0	0 0	0 0	0 0	0 0	0 0	0 0	0 0	0 0	0 0	0 0	0 0	0 2	0 0	0 0	0 3	0 1	0 5	0 2	0 0	0 5	0 0	0 3	0 4	0 10	0 5	0 0	0 3	0 0
tig00001299	1093791	C	A	0 0	0 0	0 0	0 0	0 0	0 0	0 0	0 0	0 0	0 0	0 0	0 0	0 0	0 0	0 0	0 0	0 0	0 0	0 0	0 0	0 0	0 0	0 0	0 0	0 0	0 0	0 0	0 0	0 0	0 1	0 0	0 0	0 5	0 5	4 1	0 2	0 1	6 0	0 6	0 6	6 0	7 6	1 6	1 1	0 7	0 1
tig00001299	1093811	C	T	0 0	0 0	0 0	0 0	0 0	0 0	0 0	0 0	0 0	0 0	0 0	0 0	0 0	0 0	0 0	0 0	0 0	0 0	0 0	0 0	0 0	0 0	0 0	0 0	0 0	0 0	0 0	0 0	0 0	0 1	0 0	0 0	0 5	0 6	4 1	0 4	1 4	7 0	0 7	0 9	2 4	0 15	1 9	4 1	0 12	0 8
tig00001299	1093849	G	T	0 0	0 0	0 0	0 0	0 0	0 0	0 0	0 0	0 0	0 0	0 0	0 0	0 0	0 0	0 0	0 0	0 0	0 0	0 0	0 0	0 0	0 0	0 0	0 0	0 0	0 0	0 0	0 0	0 0	0 0	0 0	0 0	7 0	10 0	8 0	8 0	8 0	10 0	11 0	11 0	10 0	14 0	11 0	8 0	12 0	13 0
tig00001299	1093884	C	A	0 1	0 2	0 0	0 0	0 1	0 0	0 0	0 1	0 1	0 0	0 0	0 0	0 1	0 1	0 0	0 0	0 0	0 0	0 0	0 1	0 0	0 0	0 1	0 0	0 0	0 0	0 0	0 0	0 2	0 0	0 0	0 0	0 7	0 13	0 10	0 6	0 16	0 9	0 16	0 12	0 11	0 12	0 14	0 19	0 17	0 19
tig00001299	1093885	G	A	0 3	0 2	0 0	0 1	0 1	0 1	0 1	0 1	0 1	0 1	0 0	0 1	0 1	0 2	0 0	0 0	0 0	0 1	0 0	0 1	0 1	0 0	0 1	0 1	0 0	0 0	0 0	0 0	1 1	0 0	0 0	0 0	0 7	0 14	5 5	0 5	7 10	9 0	0 16	0 12	12 0	5 7	5 9	9 10	0 16	0 19
tig00001299	1093936	G	A	0 28	0 21	0 22	0 15	0 14	0 19	0 15	0 17	0 17	0 30	0 35	0 21	0 32	0 23	0 1	0 7	0 7	0 6	0 10	0 9	0 31	0 26	0 15	0 7	0 3	0 15	0 6	0 8	0 29	4 7	3 3	1 0	0 12	0 18	0 20	0 13	0 23	0 12	0 22	0 18	0 20	0 21	0 20	0 22	0 22	0 24
tig00001299	1093959	TTA	CTC	0 39	0 33	0 36	0 21	0 24	0 28	0 21	0 28	0 28	0 41	0 58	0 37	0 45	0 34	0 2	0 9	0 7	0 13	0 15	0 14	0 43	0 41	0 17	0 15	0 5	0 18	0 15	0 13	0 36	0 19	0 15	0 1	0 15	0 21	0 24	0 19	0 20	0 16	0 21	0 19	0 26	0 31	0 22	0 20	0 23	0 18
tig00001299	1093967	A	G	0 46	0 39	0 39	0 22	0 27	0 35	0 25	0 37	0 31	0 46	0 66	0 40	0 50	0 37	0 4	0 9	0 7	0 13	0 17	0 16	0 44	0 45	0 21	0 15	0 5	0 18	0 17	0 14	0 37	0 24	0 17	0 1	0 16	0 22	0 26	0 17	0 20	0 18	0 20	0 19	0 26	0 31	0 21	2 20	0 23	0 20
tig00001299	1093979	C	T	0 50	0 43	0 47	0 24	0 31	0 37	0 28	0 47	0 35	0 50	0 73	0 43	0 54	0 43	0 6	0 9	0 9	0 15	0 20	0 16	0 55	0 49	0 22	0 17	0 5	0 19	0 17	0 16	0 41	0 28	0 25	0 1	0 16	0 22	0 26	0 20	0 20	0 20	0 23	0 24	0 25	0 37	0 26	0 24	0 27	0 17
tig00001299	1094017	C	T	0 45	0 43	0 52	0 21	0 34	0 47	0 30	0 48	0 41	0 52	0 77	0 40	0 57	0 49	0 10	0 3	0 10	0 20	0 22	0 15	0 59	0 53	0 29	0 22	0 2	0 12	0 18	0 20	0 29	0 35	0 39	0 2	0 19	0 22	0 33	0 22	0 25	0 33	0 27	0 24	0 29	0 50	0 29	0 26	0 34	0 24
tig00001299	1094018	G	A	0 44	0 41	0 52	0 19	0 34	0 49	0 31	0 48	0 41	0 50	0 78	0 39	0 57	0 49	0 10	0 4	0 10	0 21	0 21	0 16	0 58	0 54	0 28	0 22	0 2	0 12	0 18	0 20	0 31	0 38	0 39	0 2	0 19	0 21	0 32	0 23	0 25	0 34	0 26	0 24	0 27	0 49	0 29	0 25	0 34	0 24
tig00001299	1094041	G	A	0 47	0 55	0 48	0 13	0 35	0 49	0 27	0 53	0 44	0 60	0 76	0 37	0 46	0 46	0 13	0 9	0 12	0 22	0 24	0 11	0 58	0 53	0 25	0 22	0 11	0 9	0 21	0 20	0 33	0 41	0 31	0 2	0 20	0 18	0 28	0 23	0 16	0 31	0 21	0 26	0 28	0 49	0 25	0 20	0 30	0 21
tig00001299	1094048	G	C	0 46	0 55	0 46	0 10	0 33	0 49	0 26	0 57	0 44	0 60	0 78	0 36	0 45	0 52	0 14	0 9	0 12	0 19	0 23	0 13	0 57	0 50	0 25	0 21	0 11	0 9	0 19	0 21	0 30	0 37	0 30	0 2	0 16	0 19	0 25	0 22	0 17	0 29	0 20	0 27	0 31	0 46	0 24	0 19	0 24	0 21
tig00001299	1094048	G	T	0 46	0 55	0 46	0 10	0 33	0 49	0 26	0 57	0 44	0 60	0 78	0 36	0 45	0 52	0 14	0 9	0 12	0 19	0 23	0 13	0 57	0 50	0 25	0 21	0 11	0 9	0 19	0 21	0 30	0 37	0 30	0 2	0 16	0 19	0 25	0 22	0 17	0 29	0 20	0 27	0 31	0 46	0 24	0 19	0 24	0 21
tig00001299	1094052	A	C	0 49	0 54	0 46	0 10	0 31	0 49	0 27	0 56	0 42	0 59	0 77	0 33	0 40	0 53	0 14	0 9	0 12	0 19	0 23	0 14	0 56	0 49	0 27	0 16	0 9	0 9	0 18	0 19	0 32	0 36	0 31	0 2	0 16	0 19	0 26	0 22	0 19	0 29	0 20	0 22	0 31	0 46	0 24	0 18	0 25	0 21
tig00001299	1094061	T	A	0 49	0 58	0 51	0 12	0 32	0 46	0 25	0 54	0 44	0 62	0 78	0 34	0 40	0 58	0 13	0 9	0 13	0 18	0 22	0 13	0 62	0 46	0 26	0 17	0 13	0 11	0 17	0 21	22 14	0 32	0 25	0 2	14 0	16 0	25 0	20 0	17 0	29 0	18 0	20 0	27 0	41 0	23 0	17 0	22 0	21 0
tig00001299	1094069	AG	GA	0 0	0 0	0 0	0 0	0 0	0 0	0 0	0 0	0 0	0 0	0 0	0 0	0 0	0 0	0 0	0 0	0 0	0 0	0 0	0 0	0 0	0 0	0 0	0 0	0 0	0 0	0 0	0 0	0 23	0 13	0 5	0 0	0 13	0 15	0 22	0 19	0 14	0 27	0 16	0 20	0 27	0 41	0 20	0 16	0 21	0 19
tig00001299	1094070	G	A	8 0	21 0	21 0	3 0	11 0	20 0	12 0	6 0	7 0	19 0	28 0	8 0	18 0	24 0	6 0	1 0	8 0	11 0	7 0	5 0	28 0	23 0	17 0	9 0	0 0	1 0	7 0	5 0	5 23	15 13	11 5	2 0	0 13	0 15	0 22	0 19	0 14	0 27	0 16	0 20	0 27	0 41	0 20	0 16	0 21	0 19
tig00001299	1094070	GCT	ACC	19 0	1 0	0 0	4 0	0 0	0 0	0 0	26 0	24 0	0 0	0 0	13 0	0 0	0 0	0 0	0 0	0 0	0 0	0 0	0 0	0 0	0 0	0 0	0 0	0 0	0 0	0 0	6 0	0 23	0 13	0 5	0 0	0 13	0 15	0 22	0 19	0 14	0 27	0 16	0 20	0 27	0 41	0 20	0 16	0 21	0 19
tig00001299	1094077	T	C	40 0	49 0	43 0	10 0	23 0	38 0	20 0	37 0	37 0	54 0	66 0	30 0	30 0	51 0	9 0	9 0	12 0	16 0	17 0	12 0	54 0	42 0	24 0	15 0	13 0	9 0	16 0	16 0	13 21	0 26	0 17	0 2	0 13	0 14	0 23	0 19	0 13	0 26	0 14	0 20	0 26	0 45	0 21	0 15	0 21	0 18
tig00001299	1094078	A	T	0 40	0 49	0 42	0 10	0 23	0 38	0 20	0 37	0 37	0 54	0 66	0 29	0 30	0 50	0 9	0 9	0 12	0 15	0 18	0 12	0 54	0 40	0 24	0 15	0 13	0 10	0 16	0 15	0 33	0 25	0 17	0 2	0 13	0 13	0 22	0 19	0 13	0 27	0 14	0 20	0 25	0 45	0 21	0 14	0 21	0 18
tig00001299	1094115	T	C	27 0	31 0	24 0	5 0	14 0	19 0	9 0	23 0	21 0	40 0	40 0	18 0	17 0	27 0	5 0	8 0	3 0	6 0	14 0	7 0	28 0	19 0	10 0	6 0	13 0	9 0	10 0	10 0	8 16	0 7	0 3	0 2	0 10	0 8	0 19	0 14	0 12	0 20	0 12	0 14	0 19	0 32	0 16	0 15	0 16	0 15
tig00001299	1094135	C	A	0 17	0 15	0 15	0 2	0 7	0 6	0 6	0 16	0 12	0 14	0 26	0 10	0 7	0 10	0 2	0 3	0 1	0 0	0 6	0 6	0 18	0 12	0 4	0 1	0 4	0 5	0 6	0 4	0 13	0 5	0 1	0 2	0 7	0 7	0 13	0 13	0 8	15 1	0 8	0 10	9 7	0 19	0 9	0 9	0 11	0 11
tig00001299	1094149	T	C	0 6	0 9	0 8	0 1	0 5	0 2	0 5	0 9	0 5	0 6	0 11	0 5	0 3	0 5	0 0	0 0	0 1	0 0	0 3	0 2	0 10	0 4	0 3	0 1	0 4	0 3	0 3	0 3	0 7	0 5	0 4	0 2	0 8	0 6	0 11	0 13	0 5	0 5	0 7	0 9	0 15	0 17	0 9	0 8	0 9	0 8
tig00001299	1094160	C	T	0 0	3 0	1 0	0 0	0 0	0 0	0 0	0 0	0 0	1 0	2 0	0 0	0 0	1 0	0 0	0 0	0 0	0 0	0 0	0 0	0 0	0 0	0 0	0 0	0 0	1 0	1 0	0 0	0 0	9 0	4 0	3 0	6 0	2 0	10 0	14 0	4 0	5 0	4 0	8 0	16 0	16 0	7 0	4 0	4 0	4 0
tig00001299	1094173	AT	A	0 0	0 0	0 0	0 0	0 0	0 0	0 0	0 0	0 0	0 0	0 0	0 0	0 0	0 0	0 0	0 0	0 0	0 0	0 0	0 0	0 0	0 0	0 0	0 0	0 0	0 0	0 0	0 0	0 3	0 12	0 6	0 3	0 0	0 0	0 9	0 6	0 1	0 4	0 0	0 0	0 15	0 11	0 3	0 2	0 0	0 0
tig00001299	1094174	T	A	0 0	0 0	0 0	0 0	0 0	0 0	0 0	0 0	0 0	0 0	0 0	0 0	0 0	0 0	0 0	0 0	0 0	0 0	0 0	0 0	0 0	0 0	0 0	0 0	0 0	0 0	0 0	0 0	0 3	0 12	0 6	0 3	0 0	0 0	0 9	0 6	0 1	0 4	0 0	0 0	0 15	0 11	0 3	0 2	0 0	0 0
tig00001299	1094181	G	A	0 0	0 0	0 0	0 0	0 0	0 0	0 0	0 0	0 0	0 0	0 0	0 0	0 0	0 0	0 0	0 0	0 0	0 0	0 0	0 0	0 0	0 0	0 0	0 0	0 0	0 0	0 0	0 0	0 3	0 12	0 6	0 3	6 0	3 0	3 9	5 6	2 1	0 4	3 0	4 0	0 15	2 11	2 3	0 2	2 0	4 0
tig00001299	1094195	G	A	0 0	0 0	0 0	0 0	0 0	0 0	0 0	0 0	0 0	0 0	0 0	0 0	0 0	0 0	0 0	0 0	0 0	0 0	0 0	0 0	0 0	0 0	0 0	0 0	0 0	0 0	0 0	0 0	0 3	8 6	10 0	3 0	0 3	0 6	0 12	0 12	0 2	0 5	0 4	0 2	0 12	0 13	0 4	0 1	0 2	0 1
tig00001299	1094198	A	G	0 0	0 0	0 0	0 0	0 0	0 0	0 0	0 0	0 0	0 0	0 0	0 0	0 0	0 0	0 0	0 0	0 0	0 0	0 0	0 0	0 0	0 0	0 0	0 0	0 0	0 0	0 0	0 0	0 3	6 8	0 9	0 3	0 6	0 5	0 12	0 11	0 2	0 5	0 4	0 2	0 11	0 13	0 4	0 1	0 2	0 1
tig00001299	1094208	T	A	0 0	0 0	0 0	0 0	0 0	0 0	0 0	0 0	0 0	0 0	0 0	0 0	0 0	0 0	0 0	0 0	0 0	0 0	0 0	0 0	0 0	0 0	0 0	0 0	0 0	0 0	0 0	0 0	0 3	0 13	0 10	0 3	0 6	0 5	0 11	0 14	0 0	0 5	0 4	0 2	0 11	0 13	0 4	0 1	0 1	0 1
tig00001299	1094250	G	A	0 0	0 0	0 0	0 0	0 0	0 0	0 0	0 0	0 0	0 0	0 0	0 0	0 0	0 0	0 0	0 0	0 0	0 0	0 0	0 0	0 0	0 0	0 0	0 0	0 0	0 0	0 0	0 0	0 3	0 6	0 5	0 2	0 7	0 4	0 5	0 14	0 0	0 4	0 5	0 4	0 13	0 9	0 2	0 0	0 4	0 0
tig00001299	1094269	C	T	0 0	0 0	0 0	0 0	0 0	0 0	0 0	0 0	0 0	0 0	0 0	0 0	0 0	0 0	0 0	0 0	0 0	0 0	0 0	0 0	0 0	0 0	0 0	0 0	0 0	0 0	0 0	0 0	0 1	0 2	0 2	0 2	0 6	0 5	0 5	0 8	0 0	0 4	0 4	0 4	0 12	0 7	0 1	0 0	0 5	0 0
tig00001299	1094294	C	T	0 0	0 0	0 0	0 0	0 0	0 0	0 0	0 0	0 0	0 0	0 0	0 0	0 0	0 0	0 0	0 0	0 0	0 0	0 0	0 0	0 0	0 0	0 0	0 0	0 0	0 0	0 0	0 0	0 0	0 0	0 3	0 1	0 5	0 4	0 7	0 5	0 0	0 3	0 8	0 6	0 16	0 5	0 1	0 0	0 5	0 1
tig00001299	1094298	T	C	0 0	0 0	0 0	0 0	0 0	0 0	0 0	0 0	0 0	0 0	0 0	0 0	0 0	0 0	0 0	0 0	0 0	0 0	0 0	0 0	0 0	0 0	0 0	0 0	0 0	0 0	0 0	0 0	0 0	0 0	4 0	1 0	5 0	4 0	7 0	4 0	0 0	3 0	8 0	7 0	15 0	5 0	0 0	0 0	5 0	1 0
tig00001299	1094312	C	T	0 0	0 0	0 0	0 0	0 0	0 0	0 0	0 0	0 0	0 0	0 0	0 0	0 0	0 0	0 0	0 0	0 0	0 0	0 0	0 0	0 0	0 0	0 0	0 0	0 0	0 0	0 0	0 0	0 0	0 1	0 5	0 2	0 5	0 5	0 9	0 5	0 1	0 5	0 9	0 8	0 13	0 4	0 3	0 0	0 7	0 3
tig00001299	1094325	T	C	0 0	0 0	0 0	0 0	0 0	0 0	0 0	0 0	0 0	0 0	0 0	0 0	0 0	0 0	0 0	0 0	0 0	0 0	0 0	0 0	0 0	0 0	0 0	0 0	0 0	0 0	0 0	0 0	0 0	0 7	0 8	0 2	0 8	0 5	0 7	0 10	0 1	0 4	0 10	0 8	0 15	0 6	0 4	0 0	0 7	0 4
tig00001299	1094329	G	A	0 0	0 0	0 0	0 0	0 0	0 0	0 0	0 0	0 0	0 0	0 0	0 0	0 0	0 0	0 0	0 0	0 0	0 0	0 0	0 0	0 0	0 0	0 0	0 0	0 0	0 0	0 0	0 0	0 0	0 7	0 11	0 2	0 8	0 6	0 7	0 11	0 1	0 4	0 13	0 8	0 15	0 6	0 5	0 2	0 7	0 4
tig00001299	1094329	G	C	0 0	0 0	0 0	0 0	0 0	0 0	0 0	0 0	0 0	0 0	0 0	0 0	0 0	0 0	0 0	0 0	0 0	0 0	0 0	0 0	0 0	0 0	0 0	0 0	0 0	0 0	0 0	0 0	0 0	5 7	0 11	0 2	0 8	0 6	0 7	0 11	0 1	0 4	0 13	0 8	0 15	0 6	0 5	0 2	0 7	0 4
tig00001299	1094339	C	A	0 0	0 0	0 0	0 0	0 0	0 0	0 0	0 0	0 0	0 0	0 0	0 0	0 0	0 0	0 0	0 0	0 0	0 0	0 0	0 0	0 0	0 0	0 0	0 0	0 0	0 0	0 0	0 0	0 0	0 13	0 15	0 1	0 10	0 3	0 8	0 12	0 2	0 4	0 13	0 8	0 15	0 8	0 7	0 3	0 8	0 5
tig00001299	1094349	T	C	0 0	0 0	0 0	0 0	0 0	0 0	0 0	0 0	0 0	0 0	0 0	0 0	0 0	0 0	0 0	0 0	0 0	0 0	0 0	0 0	0 0	0 0	0 0	0 0	0 0	0 0	0 0	0 0	0 0	0 16	0 17	0 2	0 9	0 7	0 11	0 14	0 7	0 5	0 21	0 11	0 20	0 11	0 10	0 4	0 10	0 11
tig00001299	1094365	A	G	0 6	0 14	0 5	0 0	0 5	0 6	0 4	0 9	0 4	0 6	0 9	0 5	0 9	0 7	0 1	0 1	0 1	0 1	0 2	0 3	0 8	0 4	0 1	0 0	0 2	0 0	0 2	0 1	0 10	0 17	0 21	0 2	0 10	0 11	0 14	0 14	0 9	0 6	0 21	0 12	0 24	0 14	0 12	0 5	0 14	0 13
tig00001299	1094370	C	A	0 8	0 15	0 9	0 1	0 5	0 9	0 5	0 9	0 4	0 9	0 11	0 5	0 15	0 10	0 1	0 1	0 2	0 3	0 2	0 3	0 13	0 6	0 3	0 2	0 4	0 0	0 3	0 2	0 11	0 20	6 16	1 2	0 12	0 11	0 14	0 16	0 9	0 6	0 22	0 12	0 25	0 14	0 13	0 5	0 14	0 16
tig00001299	1094372	T	A	0 8	0 15	0 11	0 1	0 6	0 9	0 5	0 10	0 4	0 10	0 13	0 6	0 16	0 10	0 1	0 1	0 4	0 3	0 3	0 4	0 15	0 6	0 3	0 2	0 4	0 0	0 3	0 2	0 11	0 21	0 22	0 3	0 14	0 11	0 14	0 16	0 11	0 7	0 22	0 14	0 25	0 17	0 18	0 5	0 15	0 16
tig00001299	1094375	T	G	0 9	0 17	0 12	0 2	0 6	0 9	0 7	0 13	0 4	0 12	0 15	0 7	0 17	0 11	0 1	0 1	0 4	0 4	0 3	0 6	0 16	0 7	0 3	0 2	0 6	0 1	0 4	0 2	0 14	0 22	0 23	0 3	0 13	0 11	0 14	0 17	0 11	0 7	0 20	0 13	0 24	0 17	0 18	0 5	0 15	0 16
tig00001299	1094389	G	T	0 15	0 22	0 14	0 4	0 8	0 16	0 14	0 18	0 5	0 18	0 23	0 9	0 23	0 16	0 1	0 1	0 6	0 5	0 6	0 8	0 25	0 11	0 3	0 7	0 7	0 4	0 8	0 3	0 19	11 17	0 23	0 3	0 15	0 18	0 12	0 20	0 12	0 7	0 23	0 16	0 28	0 19	0 18	0 10	0 17	0 22
tig00001299	1094400	T	C	19 0	24 0	20 0	7 0	8 0	19 0	15 0	24 0	11 0	27 0	27 0	15 0	30 0	19 0	1 0	4 0	6 0	7 0	11 0	8 0	31 0	15 0	8 0	11 0	9 0	6 0	8 0	4 0	9 11	0 31	0 31	0 3	0 16	0 22	0 18	0 20	0 13	0 10	0 25	0 17	0 29	0 22	0 20	0 11	0 16	0 24
tig00001299	1094409	T	C	0 23	0 28	0 28	0 7	0 12	0 22	0 18	0 30	0 17	0 31	0 32	0 18	0 32	0 23	0 2	0 4	0 8	0 11	0 11	0 11	0 33	0 23	0 9	0 16	0 11	0 8	0 9	0 5	0 23	0 33	0 32	0 3	0 16	0 21	0 19	0 21	0 13	0 11	0 25	0 18	0 29	0 25	0 20	0 11	0 17	0 28
tig00001299	1094413	CCTTTTTTG	TCTTATATT	0 23	0 31	0 32	0 7	0 12	0 23	0 18	0 31	0 19	0 37	0 36	0 22	0 34	0 22	0 3	0 4	0 8	0 13	0 12	0 12	0 34	0 24	0 10	0 17	0 12	0 9	0 10	0 6	0 24	0 27	0 27	0 2	0 16	0 23	0 18	0 21	0 15	0 13	0 23	0 20	0 29	0 25	0 20	0 11	0 17	0 30
tig00001299	1094418	T	C	0 23	0 31	0 32	0 7	0 12	0 23	0 18	0 31	0 19	0 37	0 36	0 22	0 34	0 22	0 3	0 4	0 8	0 13	0 12	0 12	0 34	0 24	0 10	0 17	0 12	0 9	0 10	0 6	0 24	0 27	0 27	0 2	0 16	0 23	0 18	0 21	0 15	0 13	0 23	0 20	0 29	0 25	0 20	0 11	0 17	0 30
tig00001299	1094419	TTG	ATT	0 23	0 31	0 32	0 7	0 12	0 23	0 18	0 31	0 19	0 37	0 36	0 22	0 34	0 22	0 3	0 4	0 8	0 13	0 12	0 12	0 34	0 24	0 10	0 17	0 12	0 9	0 10	0 6	0 24	0 27	0 27	0 2	0 16	0 23	0 18	0 21	0 15	0 13	0 23	0 20	0 29	0 25	0 20	0 11	0 17	0 30
tig00001299	1094419	TTGATAT	ATTATAA	0 23	0 31	0 32	0 7	0 12	0 23	0 18	0 31	0 19	0 37	0 36	0 22	0 34	0 22	0 3	0 4	0 8	0 13	0 12	0 12	0 34	0 24	0 10	0 17	0 12	0 9	0 10	0 6	0 24	0 27	0 27	0 2	0 16	0 23	0 18	0 21	0 15	0 13	0 23	0 20	0 29	0 25	0 20	0 11	0 17	0 30
tig00001299	1094432	T	G	0 35	0 44	0 40	0 12	0 24	0 36	0 23	0 41	0 25	0 54	0 52	0 36	0 51	0 29	0 3	0 8	0 12	0 17	0 16	0 18	0 42	0 39	0 13	0 22	0 16	0 14	0 13	0 11	0 29	0 36	0 31	0 3	0 17	0 24	0 19	0 25	0 17	0 18	0 22	0 23	0 29	0 26	0 22	0 13	0 22	0 30
tig00001299	1094470	T	A	0 40	0 41	0 39	0 13	0 25	0 44	0 18	0 43	0 27	0 53	0 56	0 36	0 40	1 27	0 3	0 9	0 10	0 19	0 16	0 17	0 34	0 41	0 13	0 24	0 13	0 15	0 14	0 11	0 21	0 30	0 25	0 2	0 23	0 30	0 20	0 28	0 18	0 20	0 34	0 30	0 40	0 30	0 27	0 26	0 27	0 38
tig00001299	1094472	G	A	0 40	0 41	0 37	0 13	0 24	0 44	0 18	0 41	0 27	0 52	0 53	0 36	0 39	0 27	0 3	0 9	0 9	0 18	0 14	0 17	0 32	0 41	0 13	0 24	0 13	0 15	0 14	0 11	0 22	0 30	0 26	0 2	22 0	30 0	7 12	30 0	15 4	0 19	36 0	31 0	0 40	13 15	17 10	10 19	27 0	39 0
tig00001299	1094488	C	T	0 33	0 34	0 33	0 10	0 22	0 35	0 10	0 35	0 26	0 45	0 44	0 31	0 34	0 23	0 3	0 9	0 7	0 15	0 11	0 13	0 22	0 36	0 13	0 18	0 10	0 11	0 9	0 10	0 14	0 25	0 16	0 1	0 22	0 34	0 20	0 28	0 23	0 21	0 40	0 35	0 46	0 28	0 28	0 31	0 29	0 41
tig00001299	1094500	C	G	1 31	0 31	0 25	0 7	0 21	0 33	0 9	0 33	0 21	0 35	0 40	0 26	0 26	0 19	0 3	0 6	0 6	0 14	0 7	0 13	0 17	1 34	0 8	0 14	0 8	0 9	0 7	0 10	0 15	0 20	0 14	0 1	0 22	0 31	0 20	0 29	0 19	0 26	0 32	0 32	0 42	0 31	0 25	0 33	0 27	0 39
tig00001299	1094544	G	A	0 19	0 4	0 1	0 6	0 0	0 2	0 0	0 14	0 15	0 1	0 1	0 16	0 1	0 2	0 0	0 0	0 0	0 6	0 0	0 4	0 1	0 15	0 0	0 0	0 0	0 1	0 0	0 4	0 7	0 16	0 10	0 1	0 31	0 28	0 27	0 28	0 20	0 32	0 37	0 33	0 47	0 37	0 23	0 36	0 26	0 49
tig00001299	1094545	G	T	0 19	0 1	0 0	0 6	0 0	0 1	0 0	0 12	0 14	0 0	0 1	0 13	0 1	0 1	0 0	0 0	0 0	0 6	0 0	0 4	0 1	0 14	0 0	0 0	0 0	0 1	0 0	0 4	0 7	0 16	0 11	0 1	0 32	0 29	0 26	0 28	0 21	0 33	0 37	0 33	0 47	0 38	0 24	0 35	0 27	0 49
tig00001299	1094555	A	G	0 20	0 0	0 0	0 6	0 0	0 0	0 0	0 12	0 15	0 0	0 0	0 16	0 0	0 0	0 0	0 0	0 0	0 7	0 0	0 5	0 1	0 14	0 0	0 0	0 0	0 1	0 0	0 5	0 7	0 18	0 16	0 1	0 36	0 34	0 29	0 31	0 22	0 32	0 36	0 35	0 50	0 35	0 24	0 40	0 28	0 46
tig00001299	1094560	G	T	0 20	0 0	0 0	0 6	0 0	0 0	0 0	12 0	13 1	0 0	0 0	0 16	0 0	0 0	0 0	0 0	0 0	0 7	0 0	0 5	0 1	0 14	0 0	0 0	0 0	0 1	0 0	5 0	0 8	0 18	0 17	0 1	0 35	0 34	0 28	0 33	0 21	0 33	0 38	0 32	0 51	0 34	0 26	0 42	0 26	0 46
tig00001299	1094570	C	T	0 20	0 0	0 0	0 6	0 0	0 0	0 0	0 12	0 15	0 0	0 0	0 17	0 0	0 0	0 0	0 0	0 0	0 7	0 0	0 4	0 1	0 14	0 0	0 0	0 0	0 1	0 0	0 5	0 9	0 22	0 18	0 1	0 41	0 35	0 31	0 34	0 25	0 31	0 37	0 33	0 50	0 39	0 27	0 44	0 27	0 49
tig00001299	1094584	C	T	0 20	0 0	0 0	0 6	0 0	0 0	0 0	0 12	0 15	0 0	0 0	0 17	0 0	0 0	0 0	0 0	0 0	0 6	0 0	0 5	0 1	0 14	0 0	0 0	0 0	0 1	0 0	0 5	0 11	0 23	0 20	0 1	0 42	0 41	0 29	0 35	0 25	0 31	0 40	0 35	0 47	0 40	0 29	0 42	0 27	0 53
tig00001299	1094599	A	C	0 17	0 0	0 0	0 6	0 0	0 0	0 0	0 8	0 12	0 0	0 0	0 15	0 0	0 0	0 0	0 0	0 0	0 7	0 0	0 5	0 1	0 12	0 0	0 0	0 0	0 1	0 0	0 4	0 11	0 17	0 17	0 1	0 41	0 40	0 33	0 39	0 28	0 32	0 36	0 34	0 47	0 38	0 35	0 43	0 29	0 47
tig00001299	1094603	G	A	0 16	0 0	0 0	0 6	0 0	0 0	0 0	0 8	0 9	0 0	0 0	0 13	0 0	0 0	0 0	0 0	0 0	0 5	0 0	0 3	0 1	0 11	0 0	0 0	0 0	0 1	0 0	0 4	0 12	0 16	0 17	0 1	0 42	0 41	0 32	0 36	0 28	0 30	0 36	0 34	0 47	0 37	0 37	0 40	0 27	0 47
tig00001299	1094607	A	T	0 16	0 0	0 0	0 6	0 0	0 0	0 0	0 8	0 9	0 0	0 0	0 13	0 0	0 0	0 0	0 0	0 0	0 4	0 0	0 2	0 1	0 11	0 0	0 0	0 0	0 1	0 0	0 2	0 11	0 15	0 17	0 1	0 42	0 41	0 32	0 37	0 27	0 30	0 41	0 34	0 47	0 37	0 38	0 37	0 29	0 46
tig00001299	1094609	C	T	0 16	0 0	0 0	0 6	0 0	0 0	0 0	0 8	0 8	0 0	0 0	0 13	0 0	0 0	0 0	0 0	0 0	0 4	0 0	0 2	0 1	0 11	0 0	0 0	0 0	0 0	0 0	0 2	0 12	0 14	0 17	0 1	0 40	0 40	1 32	0 36	0 26	0 30	0 41	0 33	0 45	0 36	0 37	0 37	0 30	0 45
tig00001299	1094630	A	G	0 7	0 0	0 0	0 2	0 0	0 0	0 0	0 3	0 1	0 0	0 0	0 9	0 0	0 0	0 0	0 0	0 0	0 1	0 0	0 1	0 0	0 0	0 0	0 0	0 0	0 0	0 0	0 1	0 18	0 8	0 10	0 1	0 46	0 40	0 34	0 38	0 23	0 32	0 39	0 34	0 46	0 40	0 36	0 36	0 36	0 45
tig00001299	1094641	T	G	0 5	0 0	0 0	0 1	0 0	0 0	0 0	0 1	0 0	0 0	0 0	0 3	0 0	0 0	0 0	0 0	0 0	0 1	0 0	0 1	0 0	0 0	0 0	0 0	0 0	0 0	0 0	0 1	0 14	0 7	0 4	0 1	0 46	0 41	0 35	0 35	0 26	0 29	0 37	0 33	0 44	0 39	0 36	0 36	0 35	0 43
tig00001299	1094645	T	C	0 2	0 0	0 0	0 0	0 0	0 0	0 0	0 0	0 0	0 0	0 0	0 4	0 0	0 0	0 0	0 0	0 0	0 0	0 0	0 1	0 0	0 0	0 0	0 0	0 0	0 0	0 0	0 1	0 14	0 5	0 4	0 3	50 0	41 0	21 11	19 17	15 10	0 30	34 0	35 0	0 45	21 17	20 19	15 20	34 0	41 0
tig00001299	1094650	T	C	0 0	0 0	0 0	0 0	0 0	0 0	0 0	0 0	0 0	0 0	0 0	0 0	0 0	0 0	0 0	0 0	0 0	0 0	0 0	0 0	0 0	0 0	0 0	0 0	0 0	0 0	0 0	0 0	0 14	2 0	3 0	3 0	0 50	0 41	0 31	0 36	0 27	0 27	0 38	0 37	0 48	0 37	0 40	0 33	0 35	0 41
tig00001299	1094650	TG	CA	0 0	0 0	0 0	0 0	0 0	0 0	0 0	0 0	0 0	0 0	0 0	0 0	0 0	0 0	0 0	0 0	0 0	0 0	0 0	0 0	0 0	0 0	0 0	0 0	0 0	0 0	0 0	0 0	0 14	0 0	0 0	0 0	0 50	0 41	0 31	0 36	0 27	0 27	0 38	0 37	0 48	0 37	0 40	0 33	0 35	0 41
tig00001299	1094675	A	G	0 0	0 0	0 0	0 0	0 0	0 0	0 0	0 0	0 0	0 0	0 0	0 1	0 0	0 0	0 0	0 0	0 0	0 0	0 0	0 0	0 0	0 0	0 0	0 0	0 0	0 0	0 0	0 0	13 0	0 2	0 7	0 5	43 0	31 0	22 0	31 0	22 0	20 0	30 0	32 0	39 0	28 0	35 0	28 0	26 0	25 0
tig00001299	1094692	A	C	0 0	0 0	0 0	0 0	0 0	0 0	0 0	0 0	0 0	0 0	0 0	0 1	0 0	0 0	0 0	0 0	0 0	0 0	0 0	0 0	0 0	0 0	0 0	0 0	0 0	0 0	0 0	0 0	0 11	0 3	0 16	0 4	0 38	0 33	0 21	0 33	0 23	0 21	0 27	0 30	0 34	0 28	0 35	9 17	0 31	0 22
tig00001299	1094703	CT	C	0 0	0 0	0 0	0 0	0 0	0 0	0 0	0 0	0 0	0 0	0 0	0 1	0 0	0 0	0 0	0 0	0 0	0 0	0 0	0 0	0 0	0 0	0 0	0 0	0 0	0 0	0 0	0 0	0 4	0 5	0 17	0 4	0 37	0 28	0 17	0 25	0 19	0 22	0 26	0 29	0 29	0 26	0 34	0 18	0 29	0 19
tig00001299	1094746	A	G	0 0	0 0	0 0	0 0	0 0	0 0	0 0	0 0	0 0	0 0	0 0	0 0	0 0	0 0	0 0	0 0	0 0	0 0	0 0	0 0	0 0	0 0	0 0	2 0	0 0	0 0	0 0	0 0	0 0	0 12	0 27	0 6	33 0	19 0	18 0	19 0	18 0	17 0	25 0	27 0	33 0	24 0	29 0	16 0	27 0	15 0
tig00001299	1094772	G	A	0 1	0 0	0 0	0 0	0 0	0 0	0 0	0 0	0 0	0 0	0 0	0 0	0 0	0 0	0 0	0 0	0 0	0 0	0 0	0 0	0 0	0 0	0 0	0 1	0 0	0 0	0 0	0 0	0 0	0 16	0 20	0 6	0 29	0 12	0 12	0 19	0 16	0 15	0 17	0 25	0 27	0 20	0 26	0 11	0 18	0 10
tig00001299	1094780	T	C	0 1	0 0	0 0	0 0	0 0	0 0	0 0	0 0	0 0	0 0	0 0	0 0	0 0	0 0	0 0	0 0	0 0	0 0	0 0	0 0	0 0	0 0	0 0	0 1	0 0	0 0	0 0	0 0	0 0	0 17	0 21	0 7	25 0	12 0	7 4	6 9	12 5	0 14	13 0	22 0	0 26	12 5	12 10	6 7	5 11	4 5
tig00001299	1094795	A	C	0 0	0 0	0 0	0 0	0 0	0 0	0 0	0 0	0 0	0 0	0 0	0 0	0 0	0 0	0 0	0 0	0 0	0 0	0 0	0 0	0 0	0 0	0 0	0 0	0 0	0 0	0 0	0 0	0 0	0 17	0 20	0 5	0 21	0 11	0 10	0 15	0 12	0 12	0 10	0 16	0 14	0 13	0 15	0 11	0 19	0 8
tig00001299	1094828	CCCA	TCC	0 0	0 0	0 0	0 0	0 0	0 0	0 0	0 0	0 0	0 0	0 0	0 0	0 0	0 0	0 0	0 0	0 0	0 0	0 0	0 0	0 0	0 0	0 0	0 0	0 0	0 0	0 0	0 0	0 0	0 21	0 20	0 5	0 16	0 12	0 11	0 15	0 9	0 8	0 11	0 11	0 12	0 6	0 11	0 8	0 15	0 8
tig00001299	1094839	G	A	0 0	0 0	0 0	0 0	0 0	0 0	0 0	0 0	0 0	0 0	0 0	0 0	0 0	0 0	0 0	0 0	0 0	0 0	0 0	0 0	0 0	0 0	0 0	0 0	0 0	0 0	0 0	0 0	0 0	0 23	0 21	0 3	0 16	0 12	0 11	7 8	0 9	0 5	0 11	0 11	0 12	0 6	0 10	0 8	0 15	0 8
tig00001299	1094844	A	T	0 0	0 0	0 0	0 0	0 0	0 0	0 0	0 0	0 0	0 0	0 0	0 0	0 0	0 0	0 0	0 0	0 0	0 0	0 0	0 0	0 0	0 0	0 0	0 0	0 0	0 0	0 0	0 0	0 0	0 23	0 20	0 3	0 14	0 11	0 11	0 15	0 9	0 5	0 11	0 11	0 12	0 6	0 10	0 5	0 14	0 8
tig00001299	1094846	A	G	0 0	0 0	0 0	0 0	0 0	0 0	0 0	0 0	0 0	0 0	0 0	0 0	0 0	0 0	0 0	0 0	0 0	0 0	0 0	0 0	0 0	0 0	0 0	0 0	0 0	0 0	0 0	0 0	0 0	0 22	0 18	0 3	12 0	10 0	4 5	8 7	7 2	0 2	9 0	11 0	0 12	4 1	5 5	2 3	14 0	8 0
tig00001299	1094850	T	C	0 0	0 0	0 0	0 0	0 0	0 0	0 0	0 0	0 0	0 0	0 0	0 0	0 0	0 0	0 0	0 0	0 0	0 0	0 0	0 0	0 0	0 0	0 0	0 0	0 0	0 0	0 0	0 0	0 0	8 13	0 19	0 3	0 11	0 10	0 9	0 15	0 8	0 2	0 11	0 11	0 12	0 5	0 9	0 4	0 14	0 8
tig00001299	1094858	A	G	0 0	0 0	0 0	0 0	0 0	0 0	0 0	0 0	0 0	0 0	0 0	0 0	0 0	0 0	0 0	0 0	0 0	0 0	0 0	0 0	0 0	0 0	0 0	0 0	0 0	0 0	0 0	0 0	0 0	0 19	0 16	0 3	0 11	0 8	0 8	0 14	0 8	0 0	0 10	0 8	0 11	0 4	0 8	0 5	0 8	0 7
tig00001299	1094865	C	T	0 0	0 0	0 0	0 0	0 0	0 0	0 0	0 0	0 0	0 0	0 0	0 0	0 0	0 0	0 0	0 0	0 0	0 0	0 0	0 0	0 0	0 0	0 0	0 0	0 0	0 0	0 0	0 0	0 0	0 17	0 13	0 3	0 10	0 8	0 8	0 12	0 8	0 0	0 10	0 7	0 10	0 0	0 7	0 5	0 7	0 5
tig00001299	1094868	C	T	0 0	0 0	0 0	0 0	0 0	0 0	0 0	0 0	0 0	0 0	0 0	0 0	0 0	0 0	0 0	0 0	0 0	0 0	0 0	0 0	0 0	0 0	0 0	0 0	0 0	0 0	0 0	0 0	0 0	0 16	0 13	0 5	0 10	0 8	0 9	0 12	0 7	0 0	0 10	0 8	0 10	0 0	0 7	0 5	0 7	0 5
tig00001299	1094872	CCTG	ACTT	0 0	0 0	0 0	0 0	0 0	0 0	0 0	0 0	0 0	0 0	0 0	0 0	0 0	0 0	0 0	0 0	0 0	0 0	0 0	0 0	0 0	0 0	0 0	0 0	0 0	0 0	0 0	0 0	0 0	0 14	0 10	0 5	0 9	0 7	0 7	0 12	0 5	0 0	0 9	0 5	0 7	0 0	0 7	0 5	0 7	0 2
tig00001299	1094875	GCTCGG	TCTCAT	0 0	0 0	0 0	0 0	0 0	0 0	0 0	0 0	0 0	0 0	0 0	0 0	0 0	0 0	0 0	0 0	0 0	0 0	0 0	0 0	0 0	0 0	0 0	0 0	0 0	0 0	0 0	0 0	0 0	0 14	0 10	0 5	0 9	0 7	0 7	0 12	0 5	0 0	0 9	0 5	0 7	0 0	0 7	0 5	0 7	0 2
tig00001299	1094899	GATC	TATT	0 17	0 13	0 16	0 6	0 11	0 12	0 4	0 11	0 7	0 9	0 21	0 9	0 7	0 8	0 2	0 3	0 5	0 7	0 6	0 8	0 12	0 5	0 6	0 3	0 2	0 5	0 9	0 4	0 5	0 9	0 9	0 5	0 3	0 6	0 6	0 11	0 2	0 0	0 6	0 4	0 5	0 0	0 1	0 2	0 5	0 0
tig00001299	1094919	C	G	0 30	0 21	0 26	0 13	0 17	0 19	0 9	0 17	0 12	0 25	0 33	0 20	0 16	0 16	0 2	0 7	0 8	0 11	0 10	0 10	0 18	0 12	0 8	0 7	0 4	0 10	0 13	0 9	0 9	0 6	0 12	0 4	0 2	0 5	0 5	0 7	0 1	0 0	0 5	0 2	0 3	0 0	0 1	0 1	0 5	0 0
tig00001299	1094925	A	T	0 32	0 22	0 30	0 13	0 22	0 23	0 14	0 18	0 16	0 28	0 38	0 23	0 18	0 24	0 5	0 9	0 8	0 14	0 11	0 12	0 20	0 16	0 8	0 9	0 5	0 13	0 15	0 9	0 11	0 6	0 15	0 4	0 1	0 5	0 4	0 7	0 0	0 0	0 5	0 1	0 2	0 0	0 1	0 0	0 4	0 0
tig00001299	1094925	AGC	TGA	0 32	0 22	0 30	0 13	0 22	0 23	0 14	0 18	0 16	0 28	0 38	0 23	0 18	0 24	0 5	0 9	0 8	0 14	0 11	0 12	0 20	0 16	0 8	0 9	0 5	0 13	0 15	0 9	0 11	0 6	0 15	0 4	0 1	0 5	0 4	0 7	0 0	0 0	0 5	0 1	0 2	0 0	0 1	0 0	0 4	0 0
tig00001299	1094930	G	T	0 37	0 23	0 31	0 15	0 23	0 27	0 14	0 24	0 19	0 28	0 41	0 24	0 26	0 27	0 5	0 9	0 9	0 18	0 12	0 12	0 23	0 17	0 8	0 11	0 6	0 13	0 16	0 9	0 11	0 7	0 15	0 4	0 1	0 5	0 4	0 5	0 0	0 0	0 4	0 1	0 2	0 0	0 0	0 0	0 4	0 0
tig00001299	1094936	C	G	0 42	0 26	0 35	0 18	0 25	0 31	0 16	0 25	0 21	0 32	0 48	0 27	0 28	0 30	0 7	0 11	0 10	0 18	0 12	0 13	0 28	0 20	0 8	0 12	0 7	0 14	0 17	0 10	0 11	0 7	0 17	0 4	0 1	0 5	0 3	0 6	0 0	0 0	0 5	0 0	0 2	0 0	0 0	0 0	0 1	0 0
tig00001299	1094946	G	C	0 50	0 30	0 41	0 19	0 29	0 34	0 19	0 26	0 23	0 36	0 58	0 30	0 32	0 32	0 7	0 15	0 12	0 23	0 13	0 16	0 32	0 23	0 9	0 15	0 9	0 16	0 19	0 15	0 14	0 6	0 17	0 4	0 1	0 4	0 2	0 4	0 0	0 0	0 3	0 0	0 2	0 0	0 0	0 0	0 0	0 0
tig00001299	1094949	G	T	0 52	0 32	0 43	0 20	0 29	0 35	0 19	0 26	0 24	0 38	0 63	0 30	0 33	0 35	0 8	0 17	0 12	0 23	0 16	0 16	0 32	0 25	0 9	0 14	0 9	0 17	0 20	0 16	0 17	0 6	0 19	0 4	0 0	0 4	0 1	0 3	0 0	0 0	0 3	0 0	0 2	0 0	0 0	0 0	0 0	0 0
tig00001299	1094961	A	G	0 53	0 37	0 45	0 21	0 35	0 42	0 20	0 28	0 26	0 41	0 72	0 33	0 37	0 38	0 11	0 20	0 16	0 25	0 18	0 20	0 37	0 29	0 13	0 18	0 11	0 20	0 25	0 18	0 19	0 9	0 22	0 4	0 0	0 1	0 0	0 3	0 0	0 0	0 2	0 0	0 2	0 0	0 0	0 0	0 0	0 0
tig00001299	1094968	CTGCTTGATGGGTTCTAGCTGA	C	0 43	0 30	0 35	0 19	0 32	0 40	0 18	0 26	0 27	0 37	0 65	0 30	0 35	0 35	0 12	0 20	0 16	0 19	0 13	0 14	0 32	0 27	0 11	0 15	0 10	0 19	0 20	0 15	0 16	0 8	0 16	0 4	0 0	0 0	0 0	0 0	0 0	0 0	0 0	0 0	0 0	0 0	0 0	0 0	0 0	0 0
tig00001299	1094969	TG	CA	0 43	0 30	0 35	0 19	0 32	0 40	0 18	0 26	0 27	0 37	0 65	0 30	0 35	0 35	0 12	0 20	0 16	0 19	0 13	0 14	0 32	0 27	0 11	0 15	0 10	0 19	0 20	0 15	0 16	0 8	0 16	0 4	0 0	0 0	0 0	0 0	0 0	0 0	0 0	0 0	0 0	0 0	0 0	0 0	0 0	0 0
tig00001299	1094996	CCT	C	0 39	0 30	0 33	0 19	0 36	0 46	0 26	0 33	0 35	0 39	0 67	0 30	0 40	0 36	0 14	0 20	0 16	0 22	0 11	0 15	0 30	0 26	0 10	0 16	0 11	0 18	0 21	0 13	0 17	0 12	0 17	0 3	0 0	0 0	0 0	0 0	0 0	0 0	0 0	0 0	0 0	0 0	0 0	0 0	0 0	0 0
tig00001299	1095021	A	T	0 27	0 26	0 25	0 15	0 27	0 39	0 17	0 28	0 29	0 28	0 58	0 24	0 32	0 29	0 12	0 16	0 12	0 17	0 10	0 14	0 29	0 20	0 9	0 13	0 8	0 14	0 15	0 10	0 13	0 13	0 15	0 2	0 0	0 0	0 0	0 0	0 0	0 0	0 0	0 0	0 0	0 0	0 0	0 0	0 0	0 0
tig00001299	1095021	AAA	TAG	0 27	0 26	0 25	0 15	0 27	0 39	0 17	0 28	0 29	0 28	0 58	0 24	0 32	0 29	0 12	0 16	0 12	0 17	0 10	0 14	0 29	0 20	0 9	0 13	0 8	0 14	0 15	0 10	0 13	0 13	0 15	0 2	0 0	0 0	0 0	0 0	0 0	0 0	0 0	0 0	0 0	0 0	0 0	0 0	0 0	0 0
tig00001299	1095026	G	A	0 26	0 25	0 25	0 15	0 26	0 37	0 16	0 24	0 27	0 28	0 58	0 24	0 29	0 24	0 11	0 15	0 12	0 16	0 10	0 14	0 25	0 20	0 9	0 13	0 8	0 14	0 15	0 9	0 13	0 13	0 14	0 2	0 0	0 0	0 0	0 0	0 0	0 0	0 0	0 0	0 0	0 0	0 0	0 0	0 0	0 0
tig00001299	1095048	TGCC	T	0 8	0 14	0 12	0 9	0 17	0 20	0 11	0 20	0 19	0 17	0 31	0 15	0 14	0 15	0 7	0 5	0 6	0 9	0 6	0 10	0 13	0 10	0 6	0 6	0 3	0 10	0 9	0 0	0 6	0 13	0 15	0 1	0 0	0 0	0 0	0 0	0 0	0 0	0 0	0 0	0 0	0 0	0 0	0 0	0 0	0 0
tig00001299	1095067	T	C	0 6	0 8	0 9	0 6	0 9	0 14	0 9	0 14	0 13	0 11	0 21	0 9	0 11	0 11	0 3	0 3	0 2	0 5	0 4	0 5	0 8	0 3	0 1	0 3	0 1	0 5	0 3	0 0	0 4	0 12	0 20	0 2	0 0	0 0	0 0	0 0	0 0	0 0	0 0	0 0	0 0	0 0	0 0	0 0	0 0	0 0
tig00001299	1095073	T	A	0 3	0 7	0 8	0 3	0 6	0 11	0 6	0 8	0 9	0 9	0 12	0 6	0 6	0 8	0 2	0 3	0 1	0 3	0 2	0 5	0 5	0 1	0 1	0 3	0 1	0 2	0 2	0 0	0 2	0 13	0 24	0 1	0 0	0 0	0 0	0 0	0 0	0 0	0 0	0 0	0 0	0 0	0 0	0 0	0 0	0 0
tig00001299	1095087	G	A	0 0	0 1	0 0	0 0	0 0	0 0	0 0	0 1	0 1	0 0	0 0	0 0	0 0	0 1	0 0	0 0	0 0	0 1	0 0	0 1	0 0	0 0	0 0	0 0	0 0	0 0	0 0	0 0	0 0	0 10	0 23	0 1	0 0	0 0	0 0	0 0	0 0	0 0	0 0	0 0	0 0	0 0	0 0	0 0	0 0	0 0
tig00001299	1095094	A	G	0 0	0 0	0 0	0 0	0 0	0 0	0 0	0 0	0 0	0 0	0 0	0 0	0 0	0 0	0 0	0 0	0 0	0 0	0 0	0 0	0 0	0 0	0 0	0 0	0 0	0 0	0 0	0 0	0 0	0 10	0 23	0 2	0 0	0 0	0 0	0 0	0 0	0 0	0 0	0 0	0 0	0 0	0 0	0 0	0 0	0 0
tig00001299	1095111	AT	A	0 0	0 0	0 0	0 0	0 0	0 0	0 0	0 0	0 0	0 0	0 0	0 0	0 0	0 0	0 0	0 0	0 0	0 0	0 0	0 0	0 0	0 0	0 0	0 0	0 0	0 0	0 0	0 0	0 0	0 9	0 24	0 2	0 0	0 0	0 0	0 0	0 0	0 0	0 0	0 0	0 0	0 0	0 0	0 0	0 0	0 0
tig00001299	1095114	A	T	0 0	0 0	0 0	0 0	0 0	0 0	0 0	0 0	0 0	0 0	0 0	0 0	0 0	0 0	0 0	0 0	0 0	0 0	0 0	0 0	0 0	0 0	0 0	0 0	0 0	0 0	0 0	0 0	0 0	0 9	0 24	0 2	0 0	0 0	0 0	0 0	0 0	0 0	0 0	0 0	0 0	0 0	0 0	0 0	0 0	0 0
tig00001299	1095123	CAG	ACC	0 0	0 0	0 0	0 0	0 0	0 0	0 0	0 0	0 0	0 0	0 0	0 0	0 0	0 0	0 0	0 0	0 0	0 0	0 0	0 0	0 0	0 0	0 0	0 0	0 0	0 0	0 0	0 0	0 0	0 0	0 0	0 0	0 0	0 0	0 0	0 0	0 0	0 0	0 0	0 0	0 0	0 0	0 0	0 0	0 0	0 0
tig00001299	1095125	G	C	0 0	0 0	0 0	0 0	0 0	0 0	0 0	0 0	0 0	0 0	0 0	0 0	0 0	0 0	0 0	0 0	0 0	0 0	0 0	0 0	0 0	0 0	0 0	0 0	0 0	0 0	0 0	0 0	0 0	8 0	21 0	2 0	0 0	0 0	0 0	0 0	0 0	0 0	0 0	0 0	0 0	0 0	0 0	0 0	0 0	0 0
tig00001299	1095133	C	T	0 0	0 0	0 0	0 0	0 0	0 0	0 0	0 0	0 0	0 0	0 0	0 0	0 0	0 0	0 0	0 0	0 0	0 0	0 0	0 0	0 0	0 0	0 0	0 0	0 0	0 0	0 0	0 0	0 0	0 8	0 19	0 1	0 0	0 0	0 0	0 0	0 0	0 0	0 0	0 0	0 0	0 0	0 0	0 0	0 0	0 0
tig00001299	1095165	T	C	0 0	0 0	0 0	0 0	0 0	0 0	0 0	0 0	0 0	0 0	0 0	0 0	0 0	0 0	0 0	0 0	0 0	0 0	0 0	0 0	0 0	0 0	0 0	0 0	0 0	0 0	0 0	0 0	0 0	1 0	5 0	1 0	0 0	0 0	0 0	0 0	0 0	0 0	0 0	0 0	0 0	0 0	0 0	0 0	0 0	0 0
tig00001299	1095217	T	C	0 0	0 0	0 0	0 0	0 0	0 0	0 0	0 0	0 0	0 0	0 0	0 1	0 0	0 0	0 0	0 0	0 0	0 0	0 0	0 0	0 0	0 0	0 0	0 0	0 0	0 0	0 0	0 0	0 0	6 0	3 0	1 0	2 0	0 0	0 0	0 0	0 0	0 0	0 0	0 0	0 0	0 0	0 0	0 0	0 0	0 0
tig00001299	1095236	T	G	0 0	0 0	0 0	0 0	0 0	0 0	0 0	0 0	0 0	0 0	0 0	0 1	0 0	0 0	0 0	0 0	0 0	0 0	0 0	0 0	0 0	0 0	0 0	0 0	0 0	0 0	0 0	0 0	0 0	0 8	0 3	0 2	0 2	0 0	0 0	0 0	0 0	0 0	0 0	0 0	0 0	0 0	0 0	0 0	0 0	0 0
tig00001299	1095269	C	T	0 15	0 13	0 13	0 4	0 9	0 16	0 2	0 10	0 12	0 17	0 15	0 11	0 7	0 12	0 0	0 2	0 0	0 4	0 4	0 4	0 12	0 4	0 1	0 5	0 4	0 1	0 10	0 1	0 4	0 8	0 7	0 2	0 2	0 0	0 0	0 0	0 0	0 0	0 0	0 0	0 0	0 0	0 0	0 0	0 0	0 0
tig00001299	1095275	C	T	0 17	0 16	0 14	0 6	0 11	0 17	0 3	0 13	0 16	0 18	0 18	0 16	0 10	0 16	0 0	0 2	0 1	0 5	0 5	0 4	0 12	0 6	0 5	0 6	0 5	0 2	0 11	0 1	0 4	0 8	0 9	0 1	0 2	0 0	0 0	0 0	0 0	0 0	0 0	0 0	0 0	0 0	0 0	0 0	0 0	0 0
tig00001299	1095302	C	G	0 36	0 25	0 24	0 14	0 23	0 30	0 10	0 25	0 26	0 41	0 37	0 26	0 28	0 30	0 2	0 5	0 6	0 10	0 9	0 10	0 23	0 17	0 6	0 7	0 9	0 8	0 15	0 5	0 6	0 7	0 15	0 3	0 2	0 0	0 0	0 0	0 0	0 0	0 0	0 0	0 0	0 0	0 0	0 0	0 0	0 0
tig00001299	1095304	T	A	0 36	0 25	0 26	0 14	0 24	0 33	0 11	0 25	0 26	0 43	0 38	0 28	0 28	0 30	0 2	0 4	0 6	0 11	0 10	0 10	0 24	0 18	0 6	0 7	0 9	0 9	0 14	0 4	0 7	0 8	0 15	0 3	0 2	0 0	0 0	0 0	0 0	0 0	0 0	0 0	0 0	0 0	0 0	0 0	0 0	0 0
tig00001299	1095305	T	C	20 17	25 0	27 0	4 10	24 0	33 0	12 0	15 11	16 12	44 0	38 0	19 10	28 0	32 0	2 0	5 0	6 0	8 3	10 0	6 4	24 0	11 7	6 0	7 0	9 0	4 5	15 0	4 1	7 0	0 8	0 15	0 3	0 2	0 0	0 0	0 0	0 0	0 0	0 0	0 0	0 0	0 0	0 0	0 0	0 0	0 0
tig00001299	1095333	C	T	0 57	0 37	0 44	0 20	0 40	0 50	0 21	0 40	0 38	0 60	0 51	0 39	0 45	0 52	0 5	0 10	0 11	0 18	0 14	0 14	0 41	0 28	0 9	0 13	0 12	0 13	0 21	0 8	0 14	0 13	0 21	0 7	0 2	0 0	0 0	0 0	0 0	0 0	0 0	0 0	0 0	0 0	0 0	0 0	0 0	0 0
tig00001299	1095346	GCT	ACTG	0 53	0 34	0 43	0 21	0 40	0 49	0 20	0 40	0 38	0 57	0 52	0 39	0 46	0 48	0 5	0 11	0 12	0 19	0 13	0 13	0 38	0 27	0 9	0 13	0 12	0 15	0 19	0 9	0 15	0 14	0 22	0 6	0 0	0 0	0 0	0 0	0 0	0 0	0 0	0 0	0 0	0 0	0 0	0 0	0 0	0 0
tig00001299	1095346	GCTGC	ACTGGCA	0 53	0 34	0 43	0 21	0 40	0 49	0 20	0 40	0 38	0 57	0 52	0 39	0 46	0 48	0 5	0 11	0 12	0 19	0 13	0 13	0 38	0 27	0 9	0 13	0 12	0 15	0 19	0 9	0 15	0 14	0 22	0 6	0 0	0 0	0 0	0 0	0 0	0 0	0 0	0 0	0 0	0 0	0 0	0 0	0 0	0 0
tig00001299	1095357	C	G	0 49	0 29	0 34	0 21	0 37	0 46	0 20	0 38	0 35	0 53	0 47	0 35	0 43	0 44	0 5	0 8	0 12	0 17	0 12	1 11	0 36	0 27	0 9	0 12	0 11	0 16	0 17	0 9	0 14	13 0	22 0	7 0	0 0	0 0	0 0	0 0	0 0	0 0	0 0	0 0	0 0	0 0	0 0	0 0	0 0	0 0
tig00001299	1095366	G	A	0 45	0 25	0 30	0 18	0 32	0 40	0 19	0 32	0 29	0 49	0 37	0 30	0 41	0 38	0 5	0 8	0 10	0 13	0 11	0 11	0 32	0 26	0 8	0 10	0 10	0 15	0 13	0 9	0 12	0 15	0 18	0 7	0 0	0 0	0 0	0 0	0 0	0 0	0 0	0 0	0 0	0 0	0 0	0 0	0 0	0 0
tig00001299	1095379	GA	AT	0 39	0 21	0 30	0 15	0 31	0 42	0 17	0 29	0 24	0 44	0 35	0 24	0 37	0 30	0 5	0 7	0 8	0 11	0 9	0 10	0 23	0 24	0 4	0 9	0 6	0 13	0 12	0 7	0 12	0 18	0 16	0 8	0 0	0 0	0 0	0 0	0 0	0 0	0 0	0 0	0 0	0 0	0 0	0 0	0 0	0 0
tig00001299	1095381	A	G	0 39	0 22	0 30	0 13	0 30	0 46	0 20	0 31	0 23	0 44	0 36	0 23	0 37	0 35	0 5	0 7	0 8	0 12	0 9	0 11	0 23	0 24	0 4	0 11	0 6	0 12	0 13	0 7	0 12	0 18	0 16	0 8	0 0	0 0	0 0	0 0	0 0	0 0	0 0	0 0	0 0	0 0	0 0	0 0	0 0	0 0
tig00001299	1095387	T	C	0 35	0 23	0 27	0 11	0 27	0 44	0 23	0 30	0 21	0 37	0 29	0 23	0 32	0 36	0 6	0 8	0 6	0 11	0 9	0 9	0 22	0 25	0 7	0 12	0 5	0 9	0 12	0 7	0 11	0 18	0 14	0 8	0 0	0 0	0 0	0 0	0 0	0 0	0 0	0 0	0 0	0 0	0 0	0 0	0 0	0 0
tig00001299	1095387	T	TG	0 35	0 23	0 27	0 11	0 27	0 44	0 23	0 30	0 21	0 37	0 29	0 23	0 32	0 36	0 6	0 8	0 6	0 11	0 9	0 9	0 22	0 25	0 7	0 12	0 5	0 9	0 12	0 7	0 11	0 18	0 14	0 8	0 0	0 0	0 0	0 0	0 0	0 0	0 0	0 0	0 0	0 0	0 0	0 0	0 0	0 0
tig00001299	1095393	C	A	0 38	0 28	0 27	0 13	0 30	0 45	0 25	0 31	0 16	0 38	0 26	0 22	0 32	0 37	0 6	0 8	0 5	0 11	0 9	0 8	0 24	0 28	0 6	0 14	0 4	0 11	0 13	0 8	0 13	0 19	0 15	0 8	0 0	0 0	0 0	0 0	0 0	0 0	0 0	0 0	0 0	0 0	0 0	0 0	0 0	0 0
tig00001299	1095398	G	C	0 41	0 29	0 26	0 11	0 30	0 47	0 24	0 32	0 17	0 36	0 26	0 24	0 31	0 34	0 6	0 7	0 4	0 11	0 7	0 9	0 28	0 27	0 7	0 16	0 4	0 11	0 13	0 8	0 13	0 21	0 15	0 8	0 0	0 0	0 0	0 0	0 0	0 0	0 0	0 0	0 0	0 0	0 0	0 0	0 0	0 0
tig00001299	1095404	T	A	37 0	31 0	25 0	11 0	28 0	44 0	23 0	31 0	17 0	36 0	30 0	25 0	34 0	36 0	7 0	7 0	4 0	9 0	7 0	12 0	29 0	30 0	8 0	16 0	4 0	10 0	14 0	8 0	13 0	21 0	15 0	9 0	0 0	0 0	0 0	0 0	0 0	0 0	0 0	0 0	0 0	0 0	0 0	0 0	0 0	0 0
tig00001299	1095414	T	A	0 37	0 30	0 20	0 12	0 27	0 44	0 21	0 33	0 21	0 33	0 32	0 27	0 32	0 32	0 9	0 6	0 5	0 8	0 6	0 12	0 24	0 34	0 8	0 17	0 5	0 12	0 16	0 7	0 12	22 0	15 0	9 0	0 0	0 0	0 0	0 0	0 0	0 0	0 0	0 0	0 0	0 0	0 0	0 0	0 0	0 0
tig00001299	1095421	T	G	0 38	0 32	0 19	0 12	0 25	0 51	0 22	0 34	0 20	0 29	0 38	0 29	0 29	0 31	0 7	0 6	0 6	0 8	0 5	0 10	0 24	0 33	0 10	0 17	0 3	0 13	0 18	0 7	0 13	0 22	0 15	0 10	0 0	0 0	0 0	0 0	0 0	0 0	0 0	0 0	0 0	0 0	0 0	0 0	0 0	0 0
tig00001299	1095426	AG	A	0 32	0 37	0 19	0 9	0 19	0 44	0 20	0 35	0 20	0 28	0 35	0 29	0 27	0 27	0 6	0 4	0 6	0 6	0 5	0 11	0 23	0 27	0 9	0 15	0 4	0 12	0 17	0 7	0 9	0 22	0 16	0 9	0 0	0 0	0 0	0 0	0 0	0 0	0 0	0 0	0 0	0 0	0 0	0 0	0 0	0 0
tig00001299	1095436	T	C	0 31	0 41	0 22	0 7	0 23	0 42	0 20	0 37	0 23	0 37	0 39	0 30	0 26	0 34	0 6	0 5	0 7	0 6	0 6	0 12	0 23	0 30	0 11	0 16	0 5	0 13	0 13	0 5	0 10	22 0	20 0	10 0	0 0	0 0	0 0	0 0	0 0	0 0	0 0	0 0	0 0	0 0	0 0	0 0	0 0	0 0
tig00001299	1095447	A	T	0 37	0 43	0 26	0 9	0 25	0 43	0 27	0 39	0 30	0 41	0 46	0 32	0 28	0 43	0 7	0 7	0 8	0 8	0 8	0 15	0 32	0 36	0 11	0 18	0 6	0 14	0 16	0 8	0 11	0 25	0 22	0 10	0 0	0 0	0 0	0 0	0 0	0 0	0 0	0 0	0 0	0 0	0 0	0 0	0 0	0 0
tig00001299	1095457	C	T	0 41	0 50	1 34	0 13	0 31	0 46	0 28	0 46	0 32	0 44	0 55	0 36	0 33	0 48	0 7	0 7	0 10	0 11	0 8	0 17	0 39	0 42	0 12	0 23	0 6	0 15	0 21	0 8	0 19	0 25	0 23	0 11	0 0	0 0	0 0	0 0	0 0	0 0	0 0	0 0	0 0	0 0	0 0	0 0	0 0	0 0
tig00001299	1095458	A	G	0 41	0 51	0 36	0 15	0 31	0 45	0 28	0 46	0 32	0 44	0 55	0 36	0 33	0 47	0 7	0 7	0 10	0 11	0 7	0 17	0 40	0 41	0 12	0 23	0 7	0 15	0 22	0 8	0 20	0 25	0 23	0 11	0 0	0 0	0 0	0 0	0 0	0 0	0 0	0 0	0 0	0 0	0 0	0 0	0 0	0 0
tig00001299	1095466	GA	AC	0 45	0 55	0 41	0 17	0 32	0 52	0 30	0 51	0 40	0 47	0 60	0 41	0 37	0 54	0 8	0 8	0 13	0 13	0 11	0 19	0 46	0 44	0 13	0 26	0 7	0 16	0 25	0 8	0 20	0 25	0 25	0 11	0 0	0 0	0 0	0 0	0 0	0 0	0 0	0 0	0 0	0 0	0 0	0 0	0 0	0 0
tig00001299	1095482	TG	T	0 48	0 54	0 42	0 19	0 28	0 44	0 25	0 42	0 45	0 47	0 56	0 38	0 40	0 46	0 6	0 10	0 14	0 16	0 11	0 20	0 46	0 37	0 11	0 22	0 8	0 17	0 24	0 7	0 18	20 0	23 0	9 0	0 6	0 3	0 2	0 2	0 2	0 2	0 0	0 2	0 1	0 3	0 3	0 2	0 5	0 0
tig00001299	1095490	G	C	0 45	0 51	0 42	0 17	0 27	0 43	0 24	0 42	0 46	0 45	0 55	0 36	0 38	0 44	0 6	0 10	0 14	0 15	0 11	0 20	0 43	0 33	0 11	0 21	0 7	0 14	0 24	0 7	0 18	0 19	0 22	0 9	0 7	0 3	0 2	0 2	0 2	0 2	0 2	0 4	0 2	0 3	0 3	0 3	0 7	0 2
tig00001299	1095514	A	G	0 29	0 36	0 33	0 14	0 16	0 27	0 19	0 30	0 32	0 35	0 42	0 27	0 25	0 35	0 3	0 8	0 11	0 13	0 9	0 14	0 33	0 20	0 9	0 16	0 5	0 10	0 19	0 4	0 14	0 12	0 15	0 11	0 13	0 3	0 2	0 3	0 1	0 5	0 4	0 5	0 3	0 5	0 8	0 3	0 8	0 6
tig00001299	1095527	AT	A	0 25	0 25	0 26	0 14	0 13	0 18	0 18	0 24	0 30	0 23	0 31	0 18	0 18	0 25	0 3	0 6	0 8	0 11	0 5	0 13	0 26	0 20	0 9	0 15	0 3	0 9	0 15	0 4	0 10	0 6	0 8	0 11	0 16	0 5	0 2	0 5	0 4	0 8	0 11	0 7	0 6	0 13	0 8	0 7	0 8	0 7
tig00001299	1095532	G	A	0 25	0 25	0 26	0 14	0 13	0 18	0 18	0 24	0 30	0 23	0 31	0 18	0 18	0 25	0 3	0 6	0 8	0 11	0 5	0 13	0 26	0 20	0 9	0 15	0 3	0 9	0 15	0 4	0 10	0 6	0 8	0 11	0 16	0 5	0 2	0 5	0 4	0 8	0 11	0 7	0 6	0 13	0 8	0 7	0 8	0 7
tig00001299	1095535	A	G	0 30	0 27	0 30	0 15	0 13	0 28	0 20	0 27	1 29	0 20	0 31	0 17	0 21	0 27	0 3	0 7	0 12	0 12	0 7	0 17	0 29	0 22	0 8	0 16	0 3	0 8	0 18	0 5	0 13	0 8	0 7	0 11	10 6	5 0	2 0	2 3	1 5	0 8	11 0	7 0	0 7	3 10	4 3	1 6	3 6	4 3
tig00001299	1095545	C	T	0 27	0 24	0 31	0 14	0 14	0 30	0 18	0 26	0 33	0 22	0 27	0 15	0 22	0 22	0 2	0 6	0 11	0 14	0 6	0 17	0 27	0 18	0 7	0 14	0 5	0 8	0 17	0 2	0 13	0 7	0 5	0 10	0 16	0 6	0 3	0 5	0 10	0 12	0 11	0 7	0 8	0 17	0 11	0 9	0 14	0 8
tig00001299	1095549	A	T	0 26	0 25	0 36	0 15	0 15	0 30	0 18	0 24	0 34	0 22	0 26	0 15	0 22	0 21	0 2	0 6	0 11	0 13	0 7	0 18	0 26	0 17	0 7	0 12	0 5	0 8	0 14	0 2	0 12	0 7	0 4	0 10	0 16	0 6	0 3	0 5	0 10	0 11	0 11	0 8	0 8	0 17	0 11	0 9	0 14	0 8
tig00001299	1095555	CAT	C	0 26	0 23	0 28	0 9	0 13	0 30	0 18	0 26	0 33	0 20	0 22	0 13	0 20	0 19	0 2	0 6	0 10	0 11	0 8	0 18	0 23	0 14	0 7	0 10	0 6	0 8	0 13	0 4	0 10	0 2	0 0	0 9	0 17	0 6	0 3	0 8	0 10	0 12	0 12	0 8	0 9	0 17	0 11	0 9	0 14	0 9
tig00001299	1095558	A	T	0 26	0 23	0 28	0 9	0 13	0 30	0 18	0 26	0 33	0 20	0 22	0 13	0 20	0 19	0 2	0 6	0 10	0 11	0 8	0 18	0 23	0 14	0 7	0 10	0 6	0 8	0 13	0 4	0 10	5 2	0 0	0 9	0 17	0 6	0 3	0 8	0 10	0 12	0 12	0 8	0 9	0 17	0 11	0 9	0 14	0 9
tig00001299	1095579	A	G	0 31	0 29	0 27	0 9	0 24	0 32	0 24	0 27	0 23	0 19	0 18	0 11	0 18	0 16	0 0	0 4	0 8	0 11	0 11	0 20	0 29	0 16	0 7	0 8	0 9	0 12	0 14	0 9	0 20	0 15	0 5	0 10	0 20	0 10	0 7	0 8	0 9	0 11	0 13	0 10	0 10	0 18	0 12	0 11	0 20	0 10
tig00001299	1095583	T	C	0 33	0 33	0 27	0 10	0 27	0 34	0 26	0 28	0 28	0 21	0 21	0 13	0 21	0 17	0 0	0 4	0 8	0 11	0 11	0 21	0 29	0 16	0 8	0 10	0 10	0 12	0 16	0 10	0 23	0 16	0 5	0 10	0 20	0 10	0 8	0 8	0 10	0 12	0 12	0 10	0 10	0 18	0 13	0 11	0 20	0 11
tig00001299	1095585	T	C	0 34	0 34	0 27	0 10	0 28	0 34	0 27	0 31	0 28	0 21	0 22	0 13	0 21	0 18	0 0	0 4	0 8	0 12	0 11	0 21	0 32	0 17	0 8	0 10	0 10	0 12	0 17	0 10	0 25	0 16	0 5	0 9	0 20	0 10	0 8	0 6	0 10	0 14	0 13	0 9	0 10	0 19	0 13	0 10	0 21	0 11
tig00001299	1095589	A	G	0 36	0 41	0 29	0 11	0 31	0 35	0 27	0 32	0 30	0 22	0 25	0 13	0 22	0 19	0 0	0 4	0 8	0 13	0 13	0 21	0 35	0 19	0 8	0 10	0 11	0 12	0 18	0 11	0 27	0 16	0 6	0 9	0 20	0 13	0 9	0 9	0 10	0 16	0 13	0 9	0 10	0 19	0 13	0 11	0 22	0 11
tig00001299	1095590	AACAA	GACAG	0 38	0 41	0 29	0 11	0 31	0 36	0 28	0 32	0 30	0 23	0 25	0 13	0 23	0 19	0 0	0 4	0 8	0 14	0 13	0 21	0 35	0 19	0 8	0 10	0 12	0 12	0 18	0 12	0 29	0 17	0 7	0 9	0 21	0 13	0 10	0 9	0 10	0 16	0 13	0 10	0 10	0 18	0 13	0 11	0 22	0 13
tig00001299	1095597	C	T	0 38	0 41	0 29	0 11	0 31	0 37	0 29	0 32	0 34	0 23	0 25	0 14	0 27	0 19	0 0	0 4	0 9	0 14	0 13	0 22	0 35	0 19	0 8	0 10	0 12	0 12	0 18	0 13	0 30	0 19	0 10	0 8	0 23	0 15	0 10	0 9	0 11	0 15	0 13	0 10	0 10	0 19	0 14	0 11	0 23	0 13
tig00001299	1095609	AATA	GATC	0 38	0 41	0 28	0 11	0 30	0 37	0 29	0 32	0 35	0 22	0 26	0 15	0 28	0 23	0 0	0 4	0 10	0 14	0 13	0 22	0 36	0 19	0 8	0 10	0 12	0 12	0 19	0 15	0 31	0 21	0 11	0 6	0 28	0 15	0 10	0 10	0 12	0 17	0 13	0 13	0 10	0 19	0 14	0 11	0 25	0 15
tig00001299	1095609	AATATCT	GATCTCC	0 38	0 41	0 28	0 11	0 30	0 37	0 29	0 32	0 35	0 22	0 26	0 15	0 28	0 23	0 0	0 4	0 10	0 14	0 13	0 22	0 36	0 19	0 8	0 10	0 12	0 12	0 19	0 15	0 31	0 21	0 11	0 6	0 28	0 15	0 10	0 10	0 12	0 17	0 13	0 13	0 10	0 19	0 14	0 11	0 25	0 15
tig00001299	1095623	GT	TA	20 16	0 36	0 29	6 4	0 30	0 37	0 26	0 21	0 16	0 22	0 21	0 0	0 26	0 22	0 0	0 3	0 9	0 6	0 13	0 14	0 35	0 19	0 6	0 9	0 12	0 9	0 19	0 11	0 30	0 19	0 11	0 7	0 26	0 17	0 11	0 10	0 11	0 16	0 16	0 12	0 11	0 19	0 15	0 11	0 27	0 15
tig00001299	1095624	T	A	0 16	0 36	0 29	0 4	0 30	0 37	0 26	8 21	16 16	0 22	0 21	14 0	0 26	0 22	0 0	0 3	0 9	7 6	0 13	6 14	0 35	0 19	0 6	0 9	0 12	2 9	0 19	4 11	0 30	0 19	0 11	0 7	0 26	0 17	0 11	0 10	0 11	0 16	0 16	0 12	0 11	0 19	0 15	0 11	0 27	0 15
tig00001299	1095627	A	G	0 36	0 35	0 28	0 10	0 30	0 37	0 26	0 26	0 30	0 22	0 21	0 14	0 26	0 22	0 0	0 3	0 9	0 13	0 13	0 18	0 34	0 18	0 4	0 6	0 12	0 11	0 18	0 14	0 30	8 10	0 11	0 7	0 26	0 17	0 11	0 10	0 11	0 16	0 16	0 12	0 11	0 19	0 15	0 11	0 23	0 15
tig00001299	1095635	C	A	0 30	0 33	0 24	0 9	0 29	0 27	0 24	0 22	0 25	0 20	0 19	0 14	0 23	0 18	0 0	0 2	0 5	0 12	0 11	0 15	0 29	0 11	0 4	0 5	0 12	0 11	0 15	0 11	0 27	9 9	12 0	7 0	0 20	0 14	0 9	0 8	0 11	0 16	0 17	0 10	0 9	0 16	0 12	0 9	0 24	0 13
tig00001299	1095640	T	G	0 26	0 32	0 22	0 8	0 29	0 26	0 21	0 22	0 22	0 18	0 18	0 13	0 21	0 18	0 0	0 2	0 5	0 10	0 11	0 12	0 28	0 10	0 4	0 4	0 11	0 11	0 15	0 13	0 26	0 19	0 12	0 7	0 21	0 15	0 9	0 8	0 11	0 16	0 17	0 10	0 9	0 16	0 12	0 7	0 21	0 13
tig00001299	1095643	A	G	0 25	0 32	0 19	0 8	0 25	0 22	0 19	0 21	0 18	0 16	0 16	0 10	0 19	0 17	0 0	0 2	0 5	0 10	0 10	0 11	0 27	0 9	0 4	0 4	0 10	0 9	0 15	0 12	0 27	0 17	0 12	0 7	21 0	14 0	6 3	5 3	3 7	0 15	14 0	9 0	0 9	8 8	6 6	2 5	21 0	13 0
tig00001299	1095647	C	T	0 23	0 31	0 17	0 7	0 24	0 20	0 18	0 19	0 17	0 14	0 15	0 10	0 18	0 17	0 0	0 2	0 5	0 8	0 9	0 9	0 22	0 9	0 4	0 4	0 9	0 9	0 13	0 12	0 25	0 16	0 12	0 7	0 16	0 15	0 9	0 7	0 10	0 13	0 15	0 10	0 7	0 14	0 10	0 7	0 21	0 12
tig00001299	1095653	T	C	0 22	0 29	0 12	0 7	0 20	0 19	0 18	0 15	0 14	0 14	0 13	0 9	0 17	0 16	0 0	0 2	0 5	0 8	0 9	0 7	0 21	0 8	0 3	0 4	0 7	0 8	0 11	0 10	0 23	0 14	0 12	0 7	0 17	0 15	0 9	0 6	0 9	0 13	0 12	0 10	0 8	0 13	0 9	0 10	0 20	0 11
tig00001299	1095687	G	A	4 0	5 0	1 0	0 0	0 0	3 0	1 0	0 0	3 0	2 0	1 0	1 0	3 0	1 0	0 0	0 0	0 0	1 0	1 0	1 0	0 0	2 0	0 0	0 0	2 0	0 0	0 0	0 0	2 0	8 0	7 0	5 0	14 0	12 0	10 0	5 0	7 0	9 0	10 0	8 0	6 0	14 0	8 0	7 0	21 0	10 0
tig00001299	1095690	A	T	0 0	0 0	0 0	0 0	0 0	0 0	0 0	0 0	0 0	0 0	0 0	0 0	0 0	0 0	0 0	0 0	0 0	0 0	0 0	0 0	0 0	0 0	0 0	0 0	0 0	0 0	0 0	0 1	0 1	0 8	0 6	0 5	0 14	0 13	0 12	0 5	0 4	0 7	0 12	0 9	0 6	0 11	0 8	0 5	0 17	0 11
tig00001299	1095708	T	C	0 0	0 0	0 0	0 0	0 0	0 0	0 0	0 0	0 0	0 0	0 0	0 0	0 0	0 0	0 0	0 0	0 0	0 0	0 0	0 0	0 0	0 0	0 0	0 0	0 0	0 0	0 0	0 0	0 1	0 10	0 7	0 5	16 0	16 0	10 5	0 4	1 3	0 8	20 0	8 0	0 7	8 6	4 3	2 5	11 13	8 7
tig00001299	1095719	G	A	0 0	0 0	0 0	0 0	0 0	0 0	0 0	0 0	0 0	0 0	0 0	0 0	0 0	0 0	0 0	0 0	0 0	0 0	0 0	0 0	0 0	0 0	0 0	0 0	0 0	0 0	0 0	0 0	0 1	0 12	0 7	0 3	0 15	0 14	0 13	0 6	0 8	0 13	0 23	0 9	0 8	0 14	0 11	0 7	0 25	0 14
tig00001299	1095748	A	AAAACAAT	0 20	0 13	0 8	0 7	0 3	0 11	0 12	0 6	0 6	0 16	0 14	0 6	0 13	0 6	0 0	0 1	0 2	0 4	0 5	0 5	0 10	0 12	0 2	0 3	0 1	0 2	0 7	0 3	0 5	0 9	0 4	0 3	0 11	0 10	0 10	0 4	0 8	0 9	0 24	0 12	0 13	0 18	0 10	0 10	0 21	0 13
tig00001299	1095753	A	T	0 23	0 14	0 10	0 7	0 4	0 13	0 15	0 8	0 10	0 17	0 17	0 9	0 16	0 7	0 0	0 2	0 3	0 6	0 5	0 6	0 14	0 14	0 4	0 4	0 1	0 2	0 8	0 3	0 7	0 10	0 4	0 3	0 11	0 10	0 11	0 5	0 7	0 8	0 24	0 11	0 13	0 18	0 10	0 10	0 20	0 13
tig00001299	1095774	T	C	0 33	0 27	0 23	0 12	0 9	0 21	0 23	0 15	0 21	0 30	0 34	0 17	0 26	0 15	0 0	0 7	0 7	0 13	0 6	0 11	0 24	0 27	0 9	0 6	0 2	0 4	0 12	0 8	9 11	0 15	0 4	0 2	12 0	7 0	10 0	5 0	11 0	8 0	24 0	9 0	12 0	18 0	12 0	9 0	20 0	11 0
tig00001299	1095798	G	C	0 36	0 36	0 28	0 13	0 12	0 28	0 27	0 17	0 28	0 31	0 37	0 24	0 31	0 21	0 0	0 8	0 8	0 15	0 8	0 11	0 24	0 33	0 10	0 7	0 3	0 5	0 15	0 10	0 23	0 14	0 8	0 1	0 12	0 12	0 11	0 5	0 11	0 10	0 27	0 9	0 15	0 21	0 12	0 8	0 18	0 11
tig00001299	1095813	T	C	0 36	0 36	0 28	0 13	0 12	0 28	0 27	0 17	0 28	0 32	0 37	0 24	0 31	0 23	0 0	0 8	0 8	0 15	0 8	0 11	0 23	0 33	0 10	0 7	0 3	0 5	0 15	0 10	0 24	0 13	0 11	0 1	0 11	0 13	0 10	0 5	0 10	0 10	0 27	0 9	0 15	0 21	0 12	0 8	0 19	0 11
tig00001299	1095826	G	T	0 36	0 35	0 27	0 12	0 11	0 28	0 27	0 18	0 27	0 30	0 35	0 24	0 30	0 23	0 0	0 8	0 8	0 15	0 8	0 11	0 24	0 33	0 10	0 7	0 3	0 4	0 15	0 10	0 24	0 15	0 12	0 1	0 11	0 13	0 11	0 5	0 10	0 10	0 28	0 8	0 14	0 21	0 12	0 8	0 19	0 11
tig00001299	1095827	T	C	0 35	0 33	0 25	0 12	0 12	0 26	0 24	0 18	0 26	0 26	0 33	0 23	0 27	0 20	0 0	0 8	0 8	0 15	0 8	0 11	0 24	0 31	0 10	0 5	0 2	0 3	0 15	0 10	0 20	0 15	1 11	0 1	0 11	0 13	4 7	0 5	7 3	10 0	0 28	0 8	6 7	0 20	5 7	5 3	0 18	0 11
tig00001299	1095831	T	A	0 30	0 33	0 26	0 11	0 12	0 26	0 21	0 16	0 24	0 22	0 31	0 24	0 29	0 20	0 0	0 8	0 5	0 14	0 7	0 9	0 22	0 30	0 10	0 5	0 2	0 3	0 10	0 8	0 22	0 0	0 0	0 0	0 10	0 12	0 10	0 5	0 9	0 10	0 28	0 8	0 12	0 19	0 12	0 7	0 18	0 11
tig00001299	1095831	T	C	0 30	0 33	0 26	0 11	0 12	0 26	0 21	0 16	0 24	0 22	0 31	0 24	0 29	0 20	0 0	0 8	0 5	0 14	0 7	0 9	0 22	0 30	0 10	0 5	0 2	0 3	0 10	0 8	0 22	15 0	12 0	1 0	0 10	0 12	0 10	0 5	0 9	0 10	0 28	0 8	0 12	0 19	0 12	0 7	0 18	0 11
tig00001299	1095836	GCT	ACC	0 24	0 30	0 22	0 12	0 11	0 24	0 20	0 13	0 21	0 19	0 30	0 22	0 22	0 20	0 0	0 8	0 5	0 14	0 6	0 6	0 17	0 25	0 9	0 4	0 3	0 3	0 9	0 8	0 17	0 17	0 12	0 1	0 11	0 11	0 9	0 5	0 8	0 10	0 26	0 7	0 12	0 14	0 11	0 7	0 16	0 10
tig00001299	1095855	A	T	0 11	0 18	0 15	0 4	0 7	0 15	0 11	0 9	0 11	0 12	0 18	0 14	0 14	0 9	0 0	0 5	0 3	0 6	0 2	0 5	0 7	0 16	0 6	0 2	0 2	0 3	0 7	0 6	0 14	0 13	0 10	0 1	0 6	0 9	0 4	0 3	0 8	0 8	0 16	0 6	0 11	0 12	0 8	0 5	0 6	0 4
tig00001299	1095872	C	CA	0 0	0 0	0 0	0 0	0 0	0 0	0 0	0 0	0 0	0 0	0 0	0 0	0 0	0 0	0 0	0 0	0 0	0 0	0 0	0 0	0 0	0 0	0 0	0 0	0 0	0 0	0 0	0 0	0 0	8 0	4 0	1 0	0 0	3 0	0 0	0 0	2 0	0 0	2 0	3 0	1 0	4 0	0 0	1 0	1 0	1 0
tig00001299	1095990	T	A	0 0	0 0	0 0	0 0	0 0	0 0	0 0	0 0	0 0	0 0	0 0	0 0	0 0	0 0	0 0	0 0	0 0	0 0	0 0	0 0	0 0	0 0	0 0	0 0	0 0	0 0	0 0	0 0	0 0	0 11	0 6	0 0	0 0	0 0	0 2	0 2	0 0	0 1	0 2	0 1	0 5	0 2	0 0	0 1	0 4	0 2
tig00001299	1095994	G	A	0 0	0 0	0 0	0 0	0 0	0 0	0 0	0 0	0 0	0 0	0 0	0 0	0 0	0 0	0 0	0 0	0 0	0 0	0 0	0 0	0 0	0 0	0 0	0 0	0 0	0 0	0 0	0 0	0 0	0 11	0 6	0 0	0 0	0 0	0 2	0 2	0 0	0 1	0 2	0 1	0 5	0 2	0 0	0 1	0 5	0 2
tig00001299	1095996	A	C	0 0	0 0	0 0	0 0	0 0	0 0	0 0	0 0	0 0	0 0	0 0	0 0	0 0	0 0	0 0	0 0	0 0	0 0	0 0	0 0	0 0	0 0	0 0	0 0	0 0	0 0	0 0	0 0	0 0	0 11	0 6	0 0	0 0	0 0	0 2	0 2	0 0	0 1	0 2	0 1	0 5	0 2	0 0	0 1	0 5	0 2
tig00001299	1096011	C	T	0 0	0 0	0 0	0 0	0 0	0 0	0 0	0 0	0 0	0 0	0 0	0 0	0 0	0 0	0 0	0 0	0 0	0 0	0 0	0 0	0 0	0 0	0 0	0 0	0 0	0 0	0 0	0 0	0 0	0 10	0 6	0 0	0 0	0 0	0 2	0 2	0 0	0 1	0 3	0 1	0 6	0 2	0 0	0 1	0 5	0 2
tig00001299	1096030	G	T	0 0	0 0	0 0	0 0	0 0	0 0	0 0	0 0	0 0	0 0	0 0	0 0	0 0	0 0	0 0	0 0	0 0	0 0	0 0	0 0	0 0	0 0	0 0	0 0	0 0	0 0	0 0	0 0	0 0	0 7	0 5	0 0	0 0	0 1	0 1	0 1	0 0	0 1	0 3	0 1	0 4	0 2	0 0	0 1	0 7	0 3
tig00001299	1096035	T	A	0 0	0 0	0 0	0 0	0 0	0 0	0 0	0 0	0 0	0 0	0 0	0 0	0 0	0 0	0 0	0 0	0 0	0 0	0 0	0 0	0 0	0 0	0 0	0 0	0 0	0 0	0 0	0 0	0 0	0 6	0 3	0 0	0 0	0 1	0 1	0 1	0 0	0 1	0 3	0 0	0 4	0 2	0 0	0 0	0 7	0 3
tig00001299	1096169	T	A	0 0	0 0	0 0	0 0	0 0	0 0	0 0	0 0	0 0	0 0	0 0	0 0	0 0	0 0	0 0	0 0	0 0	0 0	0 0	0 0	0 0	0 0	0 0	0 0	0 0	0 0	0 0	0 0	0 0	0 0	0 0	0 0	0 0	0 0	0 0	0 0	0 0	0 0	0 0	0 0	0 0	0 0	0 0	0 0	1 0	1 0
tig00001299	1096188	T	C	0 0	0 0	0 4	0 0	0 0	0 2	0 1	0 0	0 0	0 0	0 20	0 0	0 0	0 4	0 0	0 0	0 0	0 0	0 0	0 0	0 5	0 2	0 0	0 1	0 1	0 0	0 2	0 4	0 0	0 0	0 0	0 0	0 2	0 0	0 0	0 0	0 0	0 0	0 0	0 0	0 0	0 0	0 1	0 0	0 0	0 0
tig00001299	1096194	T	C	0 0	0 0	1 3	0 0	0 0	0 2	0 1	0 0	0 0	0 0	0 20	0 0	0 0	4 0	0 0	0 0	0 0	0 0	0 0	0 0	5 0	2 0	0 0	1 0	0 1	0 0	0 2	0 4	0 0	0 0	0 0	0 0	2 0	0 0	0 0	0 0	0 0	0 0	0 0	0 0	0 0	0 0	1 0	0 0	0 0	0 0
tig00001299	1096212	C	T	0 0	0 0	0 4	0 0	0 0	0 2	0 1	0 0	0 0	0 0	20 0	0 0	0 0	0 6	0 0	0 0	0 0	0 0	0 0	0 0	0 5	0 2	0 0	0 1	0 0	0 0	0 0	0 4	0 0	0 0	0 0	0 0	0 2	0 0	0 0	0 0	0 0	0 0	0 0	0 0	0 0	0 0	0 1	0 0	0 1	0 0
tig00001299	1096217	C	T	0 0	0 0	0 4	0 0	0 1	0 2	0 1	0 0	0 0	0 4	20 0	0 0	0 0	0 6	0 0	0 0	0 0	0 0	0 0	0 0	0 5	0 2	0 0	0 1	0 0	0 0	0 0	0 3	0 0	0 0	0 0	0 0	0 2	0 0	0 0	0 0	0 0	0 0	0 0	0 0	0 0	0 0	0 1	0 0	1 0	0 0
tig00001299	1096222	G	A	0 0	0 0	0 4	0 0	0 1	0 1	0 1	0 0	0 0	0 4	20 0	0 0	0 0	0 6	0 0	0 0	0 0	0 0	0 0	0 0	0 5	0 2	0 0	0 1	0 0	0 0	0 0	0 2	0 0	0 0	0 0	0 0	0 2	0 0	0 0	0 0	0 0	0 0	0 0	0 0	0 0	0 0	0 1	0 0	0 1	0 0
tig00001299	1096230	CAC	TAT	0 0	0 0	0 0	0 0	0 0	0 0	0 0	0 0	0 0	0 0	17 0	0 0	0 0	0 0	0 0	0 0	0 0	0 0	0 0	0 0	0 0	0 0	0 0	0 0	0 0	0 0	0 0	0 0	0 0	0 0	0 0	0 0	0 2	0 0	0 0	0 0	0 0	0 0	0 0	0 0	0 0	0 0	0 1	0 0	0 1	0 0
tig00001299	1096254	G	A	0 0	0 0	0 0	0 0	0 0	0 0	0 0	0 0	0 0	0 1	0 0	0 0	0 0	0 0	0 0	0 0	0 0	0 0	0 0	0 0	0 0	0 0	0 0	0 0	0 0	0 0	0 0	0 0	0 0	0 0	0 0	0 0	0 0	0 0	0 0	0 0	0 0	0 0	0 0	0 0	0 0	0 0	0 0	0 0	0 0	0 0
tig00001299	1096259	T	C	0 0	0 0	0 0	0 0	0 0	0 0	0 0	0 0	0 0	1 0	0 0	0 0	0 0	0 0	0 0	0 0	0 0	0 0	0 0	0 0	0 0	0 0	1 0	0 0	0 0	0 0	0 0	0 0	0 0	0 0	0 0	0 0	0 0	0 0	0 0	0 0	0 0	0 0	0 0	0 0	0 0	0 0	0 0	0 0	0 0	0 0
tig00001299	1096268	AC	A	0 0	0 0	0 0	0 0	0 0	0 0	0 0	0 0	0 0	0 1	0 0	0 0	0 0	0 0	0 0	0 0	0 0	0 0	0 0	0 0	0 0	0 0	0 0	0 0	0 0	0 0	0 0	0 0	0 0	0 0	0 0	0 0	0 0	0 0	0 0	0 0	0 0	0 0	0 0	0 0	0 0	0 0	0 0	0 0	0 0	0 0
tig00001299	1096281	CAT	TAC	0 0	0 0	0 0	0 0	0 0	0 0	0 0	0 0	0 0	0 0	0 0	0 0	0 0	0 0	0 0	0 0	0 0	0 0	0 0	0 0	0 0	0 0	0 1	0 0	0 0	0 0	0 0	0 0	0 0	0 0	0 0	0 0	0 0	0 0	0 0	0 0	0 0	0 0	0 0	0 0	0 0	0 0	0 0	0 0	0 0	0 0
tig00001299	1096283	T	C	0 0	0 0	0 0	0 0	0 0	0 0	0 0	0 0	0 0	0 0	0 0	0 0	0 0	0 0	0 0	0 0	0 0	0 0	0 0	0 0	0 0	0 0	0 1	0 0	0 0	0 0	0 0	0 0	0 0	0 0	0 0	0 0	0 0	0 0	0 0	0 0	0 0	0 0	0 0	0 0	0 0	0 0	0 0	0 0	0 0	0 0
tig00001299	1096414	C	A	0 0	0 0	0 0	0 0	0 0	0 1	0 0	0 0	0 0	0 0	0 0	0 0	0 0	0 0	0 0	0 0	0 0	0 0	0 0	0 0	0 0	0 0	0 0	0 0	0 0	0 0	0 0	0 0	0 1	0 0	0 0	0 0	0 0	0 0	0 1	0 2	0 1	0 2	0 0	0 2	0 1	0 0	0 0	0 0	0 0	0 5
tig00001299	1096428	A	C	0 0	0 0	0 0	0 0	0 0	1 0	0 0	0 0	0 0	0 0	0 0	0 0	0 0	0 0	0 0	0 0	0 0	0 0	0 0	0 0	0 0	0 0	0 0	0 0	0 0	0 0	0 0	0 0	0 0	0 0	0 0	0 0	0 0	0 0	1 0	0 2	1 0	2 0	0 0	2 0	0 1	0 0	0 0	0 0	0 0	5 0
tig00001299	1096434	C	T	0 0	0 0	0 0	0 0	0 0	0 1	0 0	0 0	0 0	0 0	0 0	0 0	0 0	0 0	0 0	0 0	0 0	0 0	0 0	0 0	0 0	0 0	0 0	0 0	0 0	0 0	0 0	0 0	0 0	0 0	0 0	0 0	0 0	0 0	0 1	0 2	1 0	0 2	0 0	0 2	0 1	0 0	0 0	0 0	0 0	4 1
tig00001299	1096440	C	T	0 0	0 0	0 0	0 0	0 0	0 0	0 0	0 0	0 0	0 0	0 0	0 0	0 0	0 0	0 0	0 0	0 0	0 0	0 0	0 0	0 0	0 0	0 0	0 0	0 0	0 0	0 0	0 0	0 0	0 0	0 0	0 0	0 0	0 0	0 1	0 2	1 0	0 2	0 0	0 2	0 1	0 0	0 0	0 0	0 0	2 3
tig00001299	1096447	G	A	0 0	0 0	0 0	0 0	0 0	0 0	0 0	0 0	0 0	0 0	0 0	0 0	0 0	0 0	0 0	0 0	0 0	0 0	0 0	0 0	0 0	0 0	0 0	0 0	0 0	0 0	0 0	0 0	0 0	0 0	0 0	0 0	0 0	0 0	0 1	0 2	0 1	1 1	0 0	2 0	0 1	0 0	0 0	0 0	0 0	2 2
tig00001299	1096465	G	A	0 0	0 0	0 0	0 0	0 0	0 0	0 0	0 0	0 0	0 0	0 0	0 0	0 0	0 0	0 0	0 0	0 0	0 0	0 0	0 0	0 0	0 0	0 0	0 0	0 0	0 0	0 0	0 0	0 0	0 0	0 0	0 0	0 0	0 0	0 1	0 1	0 1	0 2	0 0	0 2	0 1	0 0	0 0	0 0	0 0	0 4
tig00001299	1096502	G	A	0 0	0 0	0 0	0 0	0 0	0 0	0 0	0 0	0 0	0 0	0 0	0 0	0 0	0 0	0 0	0 0	0 0	0 0	0 0	0 0	0 0	0 0	0 0	0 0	0 0	0 0	0 0	0 0	0 0	0 0	0 0	0 0	0 0	0 0	0 0	0 0	0 0	0 0	0 0	0 0	0 0	0 0	0 0	0 0	0 0	0 0
tig00001299	1096545	T	C	0 0	0 0	0 0	0 0	0 0	0 0	0 0	0 0	0 0	0 0	0 0	0 0	0 0	0 0	0 0	0 0	0 0	0 0	0 0	0 0	0 0	0 0	0 0	0 0	0 0	0 0	0 0	0 0	0 0	0 0	0 0	0 0	0 0	0 0	0 0	0 0	0 0	0 0	0 0	0 0	0 0	0 0	0 0	0 0	0 0	0 0
tig00001299	1096603	T	C	0 0	0 0	0 0	0 0	0 0	0 0	0 1	0 1	0 0	0 0	0 0	0 0	0 0	0 0	0 0	0 0	0 0	0 0	0 0	0 0	0 0	0 0	0 1	0 1	0 0	0 0	0 0	0 1	0 0	0 0	0 0	0 0	0 0	0 0	0 0	0 0	0 0	0 0	0 1	0 1	0 0	0 0	0 0	0 0	0 0	0 0
tig00001299	1096624	C	T	0 0	0 0	0 0	0 0	0 0	0 0	0 1	0 1	0 0	0 0	0 0	0 0	0 0	0 0	0 0	0 0	0 0	0 0	0 0	0 0	0 0	0 0	0 1	0 1	0 0	0 0	0 0	0 1	0 0	0 0	0 0	0 0	0 0	0 0	0 0	0 0	0 0	0 0	0 1	0 1	0 0	0 0	0 0	0 0	0 0	0 0
tig00001299	1096656	A	T	0 0	0 0	0 0	0 0	0 0	0 0	0 0	0 0	0 0	0 0	0 0	0 0	0 0	0 0	0 0	0 0	0 0	0 0	0 0	0 0	0 0	0 0	0 0	0 0	0 0	0 0	0 0	0 0	0 0	0 0	0 0	0 0	0 0	0 0	0 0	0 0	0 0	0 0	0 0	0 0	0 0	0 0	0 0	0 0	0 0	0 0
tig00001299	1096765	AT	A	0 0	0 0	0 0	0 0	0 0	0 0	0 0	0 0	0 0	0 0	0 0	0 0	0 0	0 0	0 0	0 0	0 0	0 0	0 0	0 0	0 0	0 0	0 0	0 0	0 0	0 0	0 0	0 0	0 0	0 0	0 0	0 0	0 0	0 0	0 0	0 0	0 0	0 0	0 0	0 0	0 0	0 0	0 0	0 0	0 0	0 0
tig00001299	1096768	TA	T	0 0	0 0	0 0	0 0	0 0	0 0	0 0	0 0	0 0	0 0	0 0	0 0	0 0	0 0	0 0	0 0	0 0	0 0	0 0	0 0	0 0	0 0	0 0	0 0	0 0	0 0	0 0	0 0	0 0	0 0	0 0	0 0	0 0	0 0	0 0	0 0	0 0	0 0	0 0	0 0	0 0	0 0	0 0	0 0	0 0	0 0
tig00001299	1096843	AC	A	0 0	0 1	0 0	0 0	0 0	0 0	0 0	0 0	0 0	0 0	0 0	0 0	0 0	0 0	0 0	0 0	0 0	0 0	0 0	0 0	0 0	0 0	0 0	0 0	0 0	0 0	0 0	0 0	0 0	0 0	0 0	0 0	0 0	0 0	0 0	0 0	0 0	0 0	0 0	0 0	0 0	0 4	0 0	0 0	0 0	0 0
tig00001299	1096844	C	A	0 0	0 1	0 0	0 0	0 0	0 0	0 0	0 0	0 0	0 0	0 0	0 0	0 0	0 0	0 0	0 0	0 0	0 0	0 0	0 0	0 0	0 0	0 0	0 0	0 0	0 0	0 0	0 0	0 0	0 0	0 0	0 0	0 0	0 0	0 0	0 0	0 0	0 0	0 0	0 0	0 0	0 4	0 0	0 0	0 0	0 0
tig00001299	1096854	A	G	0 0	0 1	0 0	0 0	0 0	0 0	0 0	0 0	0 0	0 0	0 0	0 0	0 0	0 0	0 0	0 0	0 0	0 0	0 0	0 0	0 0	0 0	0 0	0 0	0 0	0 0	0 0	0 0	0 0	0 0	0 0	0 0	0 0	0 0	0 0	0 0	0 0	0 0	0 0	0 0	0 0	0 3	0 0	0 0	0 0	0 0
tig00001299	1096875	A	G	0 0	1 0	0 0	0 0	0 0	0 0	0 0	0 0	0 0	0 0	0 0	0 0	0 0	0 0	0 0	0 0	0 0	0 0	0 0	0 0	0 0	0 0	0 0	0 0	0 0	0 0	0 0	0 0	0 0	0 0	0 0	0 0	0 0	0 0	0 0	0 0	0 0	0 0	0 0	0 0	0 0	2 0	0 0	0 0	0 0	0 0
tig00001299	1096895	AATTTTTATTTT	A	0 0	0 0	0 0	0 0	0 0	0 0	0 0	0 0	0 0	0 0	0 0	0 0	0 0	0 0	0 0	0 0	0 0	0 0	0 0	0 0	0 0	0 0	0 0	0 0	0 0	0 0	0 0	0 0	0 0	0 0	0 0	0 0	0 0	0 0	0 0	0 0	0 1	0 0	0 0	0 0	0 0	0 0	0 0	0 4	0 2	0 0
tig00001299	1096900	T	G	0 0	0 0	0 0	0 0	0 0	0 0	0 0	0 0	0 0	0 0	0 0	0 0	0 0	0 0	0 0	0 0	0 0	0 0	0 0	0 0	0 0	0 0	0 0	0 0	0 0	0 0	0 0	0 0	0 0	0 0	0 0	0 0	0 0	0 0	0 0	0 0	0 1	0 0	0 0	0 0	0 0	0 0	0 0	0 4	0 2	0 0
tig00001299	1096924	GAATCT	TGATCC	0 0	0 0	0 0	0 0	0 0	0 0	0 0	0 0	0 0	0 0	0 0	0 0	0 0	0 0	0 0	0 0	0 0	0 0	0 0	0 0	0 0	0 0	0 0	0 0	0 0	0 0	0 0	0 0	0 0	0 0	0 0	0 0	0 0	0 0	0 0	0 0	0 0	0 0	0 0	0 0	0 0	0 0	0 0	0 0	0 0	0 0
tig00001299	1096925	A	G	0 0	0 0	0 0	0 0	0 0	0 0	0 0	0 0	0 0	0 0	0 0	0 0	0 0	0 0	0 0	0 0	0 0	0 0	0 0	0 0	0 0	0 0	0 0	0 0	0 0	0 0	0 0	0 0	0 0	0 0	0 0	0 0	0 0	0 0	0 0	0 0	0 0	0 0	0 0	0 0	0 0	0 0	0 0	0 0	0 0	0 0
tig00001299	1096925	AATCT	GATCTGGC	0 0	0 0	0 0	0 0	0 0	0 0	0 0	0 0	0 0	0 0	0 0	0 0	0 0	0 0	0 0	0 0	0 0	0 0	0 0	0 0	0 0	0 0	0 0	0 0	0 0	0 0	0 0	0 0	0 0	0 0	0 0	0 0	0 0	0 0	0 0	0 0	0 0	0 0	0 0	0 0	0 0	0 0	0 0	0 0	0 0	0 0
tig00001299	1096938	CA	TG	0 0	0 0	0 0	0 0	0 0	0 0	0 0	0 0	0 0	0 0	0 0	0 0	0 0	0 0	0 0	0 0	0 0	0 0	0 0	0 0	0 0	0 0	0 0	0 0	0 0	0 0	0 0	0 0	0 0	0 0	0 0	0 0	0 0	0 0	0 0	0 0	0 0	0 0	0 0	0 0	0 0	0 0	0 0	0 0	0 0	0 0
tig00001299	1096946	C	CTAAGATATTTGGG	0 0	0 0	0 0	0 0	0 0	0 0	0 0	0 0	0 0	0 0	0 0	0 0	0 0	0 0	0 0	0 0	0 0	0 0	0 0	0 0	0 0	0 0	0 0	0 0	0 0	0 0	0 0	0 0	0 0	0 0	0 2	0 0	0 0	0 0	0 0	0 0	0 0	0 0	0 0	0 0	0 0	0 0	0 0	0 0	0 0	0 0
tig00001299	1096946	CTAAGATATTTGG	TTAAGATATTTGA	0 0	0 0	0 0	0 0	0 0	0 0	0 0	0 0	0 0	0 0	0 0	0 0	0 0	0 0	0 0	0 0	0 0	0 0	0 0	0 0	0 0	0 0	0 0	0 0	0 0	0 0	0 0	0 0	0 0	0 0	0 2	0 0	0 0	0 0	0 0	0 0	0 0	0 0	0 0	0 0	0 0	0 0	0 0	0 0	0 0	0 0
tig00001299	1096978	T	C	0 0	0 0	0 0	0 0	0 0	0 0	0 0	0 0	0 0	0 0	0 0	0 0	0 0	0 0	0 0	0 0	0 0	0 0	0 0	0 0	0 0	0 0	0 0	0 0	0 0	0 0	0 0	0 0	0 0	0 0	0 2	0 0	0 0	0 0	0 0	0 0	0 0	0 0	0 0	0 0	0 0	0 0	0 0	0 0	0 0	0 0
tig00001299	1096993	C	T	0 0	0 0	0 0	0 0	0 0	0 0	0 0	0 0	0 0	0 0	0 0	0 0	0 0	0 0	0 0	0 0	0 0	0 0	0 0	0 0	0 0	0 0	0 0	0 0	0 0	0 0	0 0	0 0	0 0	0 0	0 0	0 0	0 0	0 0	0 0	0 0	0 0	0 0	0 0	0 0	0 0	0 0	0 0	0 0	0 0	0 0
tig00001299	1096998	C	T	0 0	0 0	0 0	0 0	0 0	0 0	0 0	0 0	0 0	0 0	0 0	0 0	0 0	0 0	0 0	0 0	0 0	0 0	0 0	0 0	0 0	0 0	0 0	0 0	0 0	0 0	0 0	0 0	0 0	0 0	0 0	0 0	0 0	0 0	0 0	0 0	0 0	0 0	0 0	0 0	0 0	0 0	0 0	0 0	0 0	0 0
tig00001299	1097000	ATTT	GTTA	0 0	0 0	0 0	0 0	0 0	0 0	0 0	0 0	0 0	0 0	0 0	0 0	0 0	0 0	0 0	0 0	0 0	0 0	0 0	0 0	0 0	0 0	0 0	0 0	0 0	0 0	0 0	0 0	0 0	0 0	0 0	0 0	0 0	0 0	0 0	0 0	0 0	0 0	0 0	0 0	0 0	0 0	0 0	0 0	0 0	0 0
tig00001299	1097030	TATA	GTATG	0 0	0 0	0 0	0 0	0 0	0 0	0 0	0 0	0 0	0 0	0 0	0 0	0 0	0 0	0 0	0 0	0 0	0 0	0 0	0 0	0 0	0 0	0 0	0 0	0 0	0 0	0 0	0 0	0 0	0 0	0 0	0 0	0 0	0 0	0 0	0 0	0 0	0 0	0 0	0 0	0 0	0 0	0 0	0 0	0 0	0 0
tig00001299	1097053	GAAAAAAAAATACAAACAATT	AAAAAAAAATACAAACAATTA	0 0	0 0	0 0	0 0	0 0	0 0	0 0	0 0	0 0	0 0	0 0	0 0	0 0	0 0	0 0	0 0	0 0	0 0	0 0	0 0	0 0	0 0	0 0	0 0	0 0	0 0	0 0	0 0	0 0	0 0	0 0	0 0	0 0	0 0	0 0	0 0	0 0	0 0	0 0	0 0	0 0	0 0	0 0	0 0	0 0	0 0
tig00001299	1097062	ATACAAACAATT	TACAAACAATTA	0 0	0 0	0 0	0 0	0 0	0 0	0 0	0 0	0 0	0 0	0 0	0 0	0 0	0 0	0 0	0 0	0 0	0 0	0 0	0 0	0 0	0 0	0 0	0 0	0 0	0 0	0 0	0 0	0 0	0 0	0 0	0 0	0 0	0 0	0 0	0 0	0 0	0 0	0 0	0 0	0 0	0 0	0 0	0 0	0 0	0 0
tig00001299	1097063	TACAAACAATTAAAAAAC	ATACAAACAATTAAAAAAAT	0 0	0 0	0 0	0 0	0 0	0 0	0 0	0 0	0 0	0 0	0 0	0 0	0 0	0 0	0 0	0 0	0 0	0 0	0 0	0 0	0 0	0 0	0 0	0 0	0 0	0 0	0 0	0 0	0 0	0 0	0 0	0 0	0 0	0 0	0 0	0 0	0 0	0 0	0 0	0 0	0 0	0 0	0 0	0 0	0 0	0 0
tig00001299	1097073	T	TA	0 0	0 0	0 0	0 0	0 0	0 0	0 0	0 0	0 0	0 0	0 0	0 0	0 0	0 0	0 0	0 0	0 0	0 0	0 0	0 0	0 0	0 0	0 0	0 0	0 0	0 0	0 0	0 0	0 0	0 0	0 0	0 0	0 0	0 0	0 0	0 0	0 0	0 0	0 0	0 0	0 0	0 0	0 0	0 0	0 0	0 0
tig00001299	1097085	CA	C	0 0	0 0	0 0	0 0	0 0	0 0	0 0	0 0	0 0	0 0	0 0	0 0	0 0	0 0	0 0	0 0	0 0	0 0	0 0	0 0	0 0	0 0	0 0	0 0	0 0	0 0	0 0	0 0	0 0	0 0	0 0	0 0	0 0	0 0	0 0	0 0	0 0	0 0	0 0	0 0	0 0	0 0	0 0	0 0	0 0	0 0
tig00001299	1097087	A	AAAAAAT	0 0	0 0	0 0	0 0	0 0	0 0	0 0	0 0	0 0	0 0	0 0	0 0	0 0	0 0	0 0	0 0	0 0	0 0	0 0	0 0	0 0	0 0	0 0	0 0	0 0	0 0	0 0	0 0	0 0	0 0	0 0	0 0	0 0	0 0	0 0	0 0	0 0	0 0	0 0	0 0	0 0	0 0	0 0	0 0	0 0	0 0
tig00001299	1097126	A	T	0 0	0 0	0 0	0 0	0 0	0 0	0 0	0 0	0 0	0 0	0 0	0 0	0 0	0 0	0 0	0 0	0 0	0 0	0 0	0 0	0 0	0 0	0 0	0 0	0 0	0 0	0 0	0 0	0 0	0 0	0 0	0 0	0 0	0 0	0 0	0 0	0 0	0 0	0 0	0 0	0 0	0 0	1 0	0 0	1 0	3 0
tig00001299	1097151	A	ATCTC	0 0	0 0	0 0	0 0	0 0	0 0	0 0	0 0	0 0	0 0	0 0	0 0	0 0	0 0	0 0	0 0	0 0	0 0	0 0	0 0	0 0	0 0	0 0	0 0	0 0	0 0	0 0	0 0	0 0	0 0	0 0	0 0	0 0	0 0	0 0	0 0	0 2	0 0	0 1	0 1	0 0	0 0	0 3	0 0	0 1	0 6
tig00001299	1097151	A	ATCTCTC	0 0	0 0	0 0	0 0	0 0	0 0	0 0	0 0	0 0	0 0	0 0	0 0	0 0	0 0	0 0	0 0	0 0	0 0	0 0	0 0	0 0	0 0	0 0	0 0	0 0	0 0	0 0	0 0	0 0	0 0	0 0	0 0	0 0	0 0	0 0	0 0	0 2	0 0	0 1	0 1	0 0	0 0	0 3	0 0	0 1	0 6
tig00001299	1097167	T	A	0 0	0 0	0 0	0 0	0 0	0 0	0 0	0 0	0 0	0 0	0 0	0 0	0 0	0 0	0 0	0 0	0 0	0 0	0 0	0 0	0 0	0 0	0 0	0 0	0 0	0 0	0 0	0 0	0 0	0 0	0 0	0 0	0 0	0 0	0 0	0 0	0 2	0 0	0 1	0 1	0 0	0 1	0 3	0 0	0 1	0 6
tig00001299	1097182	C	G	0 0	0 0	0 0	0 0	0 0	0 0	0 0	0 0	0 0	0 0	0 0	0 0	0 0	0 0	0 0	0 0	0 0	0 0	0 0	0 0	0 0	0 0	0 0	0 0	0 0	0 0	0 0	0 0	0 0	0 0	0 0	0 0	0 0	0 0	0 0	0 0	0 2	0 0	0 1	0 1	0 0	0 1	0 2	0 0	0 1	0 6
tig00001299	1097188	G	A	0 0	0 0	0 0	0 0	0 0	0 0	0 0	0 0	0 0	0 0	0 0	0 0	0 0	0 0	0 0	0 0	0 0	0 0	0 0	0 0	0 0	0 0	0 0	0 0	0 0	0 0	0 0	0 0	0 0	0 0	0 0	0 0	0 0	0 0	0 0	0 0	0 2	0 0	0 1	0 1	0 0	0 1	0 3	0 0	0 1	0 6
tig00001299	1097191	C	T	0 0	0 0	0 0	0 0	0 0	0 0	0 0	0 0	0 0	0 0	0 0	0 0	0 0	0 0	0 0	0 0	0 0	0 0	0 0	0 0	0 0	0 0	0 0	0 0	0 0	0 0	0 0	0 0	0 0	0 0	0 0	0 0	0 0	0 0	0 0	0 0	2 0	0 0	1 0	1 0	0 0	1 0	3 0	0 0	1 0	6 0
tig00001299	1097193	G	T	0 0	0 0	0 0	0 0	0 0	0 0	0 0	0 0	0 0	0 0	0 0	0 0	0 0	0 0	0 0	0 0	0 0	0 0	0 0	0 0	0 0	0 0	0 0	0 0	0 0	0 0	0 0	0 0	0 0	0 0	0 0	0 0	0 0	0 0	0 0	0 0	0 2	0 0	0 1	0 1	0 0	0 1	0 3	0 0	0 1	0 6
tig00001299	1097215	C	T	0 0	0 0	0 0	0 0	0 0	0 0	0 0	0 0	0 0	0 0	0 0	0 0	0 0	0 0	0 0	0 0	0 0	0 0	0 0	0 0	0 0	0 0	0 0	0 0	0 0	0 0	0 0	0 0	0 0	0 0	0 0	0 0	0 0	0 0	0 0	0 0	0 2	0 0	0 1	0 1	0 0	0 1	0 2	0 0	0 1	0 6
tig00001299	1097219	T	C	0 0	0 0	0 0	0 0	0 0	0 0	0 0	0 0	0 0	0 0	0 0	0 0	0 0	0 0	0 0	0 0	0 0	0 0	0 0	0 0	0 0	0 0	0 0	0 0	0 0	0 0	0 0	0 0	0 0	0 0	0 0	0 0	0 0	0 0	0 0	0 0	0 2	0 0	0 1	0 1	0 0	0 1	0 2	0 0	0 1	0 6
tig00001299	1097230	C	G	0 0	0 0	0 0	0 0	0 0	0 0	0 0	0 0	0 0	0 0	0 0	0 0	0 0	0 0	0 0	0 0	0 0	0 0	0 0	0 0	0 0	0 0	0 0	0 0	0 0	0 0	0 0	0 0	0 0	0 0	0 0	0 0	0 0	0 0	0 0	0 0	0 0	0 0	0 0	0 0	0 0	0 0	0 0	0 0	0 0	0 0
tig00001299	1097244	G	A	0 0	0 0	0 0	0 0	0 0	0 0	0 0	0 0	0 0	0 0	0 0	0 0	0 0	0 0	0 0	0 0	0 0	0 0	0 0	0 0	0 0	0 0	0 0	0 0	0 0	0 0	0 0	0 0	0 0	0 0	0 0	0 0	0 0	0 0	0 0	0 0	0 0	0 0	0 0	0 0	0 0	0 0	0 0	0 0	0 0	0 0
tig00001299	1097269	C	A	0 0	0 0	0 0	0 0	0 0	0 0	0 0	0 0	0 0	0 0	0 0	0 1	0 0	0 0	0 0	0 0	0 0	0 0	0 0	0 0	0 0	0 0	0 0	0 0	0 0	0 0	0 0	0 0	0 0	0 0	0 0	0 0	0 0	0 0	0 0	0 0	0 2	0 0	0 1	0 1	0 0	0 1	0 2	0 0	0 1	0 3
tig00001299	1097269	C	T	0 0	0 0	0 0	0 0	0 0	0 0	0 0	0 0	0 0	0 0	0 0	0 1	0 0	0 0	0 0	0 0	0 0	0 0	0 0	0 0	0 0	0 0	0 0	0 0	0 0	0 0	0 0	0 0	0 0	0 0	0 0	0 0	0 0	0 0	0 0	0 0	0 2	0 0	0 1	0 1	0 0	0 1	0 2	0 0	0 1	0 3
tig00001299	1097274	G	A	0 0	0 0	0 0	0 0	0 0	0 0	0 0	0 0	0 0	0 0	0 0	0 1	0 0	0 0	0 0	0 0	0 0	0 0	0 0	0 0	0 0	0 0	0 0	0 0	0 0	0 0	0 0	0 0	0 0	0 0	0 0	0 0	0 0	0 0	0 0	0 0	0 2	0 0	0 1	0 1	0 0	0 1	0 1	0 0	0 1	0 3
tig00001299	1097280	C	T	0 0	0 0	0 0	0 0	0 0	0 0	0 0	0 0	0 0	0 0	0 0	0 0	0 0	0 0	0 0	0 0	0 0	0 0	0 0	0 0	0 0	0 0	0 0	0 0	0 0	0 0	0 0	0 0	0 0	0 0	1 0	0 0	0 0	0 0	0 0	0 0	2 0	0 0	1 0	1 0	0 0	1 0	2 0	0 0	1 0	3 0
tig00001299	1097281	C	A	0 0	0 0	0 0	0 0	0 0	0 0	0 0	0 0	0 0	0 0	0 0	0 1	0 0	0 0	0 0	0 0	0 0	0 0	0 0	0 0	0 0	0 0	0 0	0 0	0 0	0 0	0 0	0 0	0 0	0 0	0 1	0 0	0 0	0 0	0 0	0 0	0 2	0 0	0 1	0 1	0 0	0 1	0 2	0 0	0 1	0 3
tig00001299	1097284	C	T	0 0	0 0	0 0	0 0	0 0	0 0	0 0	0 0	0 0	0 0	0 0	0 1	0 0	0 0	0 0	0 0	0 0	0 0	0 0	0 0	0 0	0 0	0 0	0 0	0 0	0 0	0 0	0 0	0 0	0 0	0 2	0 0	0 0	0 0	0 0	0 0	0 2	0 0	0 1	0 1	0 0	0 1	0 2	0 0	0 1	0 3
tig00001299	1097305	A	G	0 0	0 0	0 0	0 0	0 0	0 0	0 0	0 0	0 0	0 0	0 0	0 0	0 0	0 0	0 0	0 0	0 0	0 0	0 0	0 0	0 0	0 0	0 0	0 0	0 0	0 0	0 0	0 0	0 0	0 0	2 0	0 0	0 0	0 0	0 0	0 0	2 0	0 0	0 0	0 0	0 0	0 0	1 0	0 0	0 0	3 0
tig00001299	1097322	G	T	0 0	0 0	0 0	0 0	0 0	0 0	0 0	0 0	0 0	0 0	0 0	0 0	0 0	0 0	0 0	0 0	0 0	0 0	0 0	0 0	0 0	0 0	0 0	0 0	0 0	0 0	0 0	0 0	0 0	0 0	0 2	0 0	0 0	0 0	0 0	0 0	0 0	0 0	0 0	0 0	0 0	0 0	0 0	0 0	0 0	0 0
tig00001299	1097341	G	A	0 0	0 0	0 0	0 0	0 0	0 0	0 0	0 0	0 0	0 0	0 0	0 0	0 0	0 0	0 0	0 0	0 0	0 0	0 0	0 0	0 0	0 0	0 0	0 0	0 0	0 0	0 0	0 0	0 0	0 0	0 2	0 0	0 0	0 0	0 0	0 0	0 0	0 0	0 0	0 0	0 0	0 0	0 0	0 0	0 0	0 0
tig00001299	1097351	A	G	0 0	0 0	0 0	0 0	0 0	0 0	0 0	0 0	0 0	0 0	0 0	0 0	0 0	0 0	0 0	0 0	0 0	0 0	0 0	0 0	0 0	0 0	0 0	0 0	0 0	0 0	0 0	0 0	0 0	0 0	0 2	0 0	0 0	0 0	0 0	0 0	0 0	0 0	0 0	0 0	0 0	0 0	0 0	0 0	0 0	0 0
tig00001299	1097383	C	T	0 0	0 0	0 0	0 0	0 0	0 0	0 0	0 0	0 0	0 0	0 0	0 0	0 0	0 0	0 0	0 0	0 0	0 0	0 0	0 0	0 0	0 0	0 0	0 0	0 0	0 0	0 0	0 0	0 0	0 0	0 0	0 0	0 0	0 0	0 0	0 0	0 0	0 0	0 0	0 0	0 0	0 0	0 0	0 0	0 0	0 0
tig00001299	1097394	C	T	0 0	0 0	0 0	0 0	0 0	0 0	0 0	0 0	0 0	0 0	0 0	0 0	0 0	0 0	0 0	0 0	0 0	0 0	0 0	0 0	0 0	0 0	0 0	0 0	0 0	0 0	0 0	0 0	0 0	0 0	0 0	0 0	0 0	0 0	0 0	0 0	0 0	0 0	0 0	0 0	0 0	0 0	0 0	0 0	0 0	0 0
tig00001299	1097399	G	A	0 0	0 2	0 11	0 0	0 0	0 0	0 0	0 0	0 0	0 0	0 0	0 0	0 0	0 0	0 0	0 0	0 0	0 0	0 0	0 0	0 0	0 0	0 0	0 0	0 0	0 0	0 0	0 0	0 0	0 0	0 0	0 0	0 0	0 0	0 0	0 0	0 0	0 0	0 0	0 0	0 0	0 0	0 0	0 0	0 0	0 0
tig00001299	1097413	A	G	0 0	0 5	0 12	0 0	0 0	0 0	0 0	0 0	0 0	0 0	0 0	0 0	0 0	0 0	0 0	0 0	0 0	0 0	0 0	0 0	0 0	0 0	0 0	0 0	0 0	0 0	0 0	0 0	0 0	0 0	0 0	0 0	0 0	0 0	0 0	0 0	0 0	0 0	0 0	0 0	0 0	0 0	0 0	0 0	0 0	0 0
tig00001299	1097415	AAGAGGC	A	0 0	0 0	0 0	0 0	0 0	0 0	0 0	0 0	0 0	0 0	0 0	0 0	0 0	0 0	0 0	0 0	0 0	0 0	0 0	0 0	0 0	0 0	0 0	0 0	0 0	0 0	0 0	0 0	0 0	0 0	0 0	0 0	0 0	0 0	0 0	0 0	0 0	0 0	0 0	0 0	0 0	0 0	0 0	0 0	0 0	0 0
tig00001299	1097415	AAGAGGCAGAGGC	A	0 0	0 0	0 0	0 0	0 0	0 0	0 0	0 0	0 0	0 0	0 0	0 0	0 0	0 0	0 0	0 0	0 0	0 0	0 0	0 0	0 0	0 0	0 0	0 0	0 0	0 0	0 0	0 0	0 0	0 0	0 0	0 0	0 0	0 0	0 0	0 0	0 0	0 0	0 0	0 0	0 0	0 0	0 0	0 0	0 0	0 0
tig00001299	1097415	AAGAGGCAGAGGCAGAGGC	A	0 0	0 0	0 0	0 0	0 0	0 0	0 0	0 0	0 0	0 0	0 0	0 0	0 0	0 0	0 0	0 0	0 0	0 0	0 0	0 0	0 0	0 0	0 0	0 0	0 0	0 0	0 0	0 0	0 0	0 0	0 0	0 0	0 0	0 0	0 0	0 0	0 0	0 0	0 0	0 0	0 0	0 0	0 0	0 0	0 0	0 0
tig00001299	1097433	CAGAGGC	T	0 0	4 0	12 0	0 0	0 0	0 0	0 0	0 0	0 0	0 0	0 0	0 0	0 0	0 0	0 0	0 0	0 0	0 0	0 0	0 0	0 0	0 0	0 0	0 0	0 0	0 0	0 0	0 0	0 0	0 0	0 0	0 0	0 0	0 0	0 0	0 0	0 0	0 0	0 0	0 0	0 0	0 0	0 0	0 0	0 0	0 0
tig00001299	1097458	G	A	0 18	0 17	0 31	0 0	0 8	2 11	0 6	0 9	0 0	0 15	0 13	1 5	0 5	0 9	0 0	0 0	0 6	0 2	0 0	0 0	0 0	0 7	0 0	0 0	0 1	0 0	0 0	0 2	0 12	0 0	0 0	0 0	0 0	0 0	0 0	0 0	0 0	0 4	0 0	0 2	0 0	0 2	0 1	0 0	0 0	0 2
tig00001299	1097459	C	T	0 18	0 17	0 31	0 0	0 8	0 11	0 6	0 9	0 0	0 15	0 13	0 5	0 5	0 9	0 0	0 0	0 6	0 2	0 0	0 0	0 0	0 7	0 0	0 0	0 1	0 0	0 0	0 2	0 12	0 0	0 0	0 0	0 0	0 0	0 0	0 0	0 0	0 4	0 0	0 2	0 0	0 2	0 1	0 0	1 0	0 2
tig00001299	1097462	C	T	0 19	0 18	0 33	0 0	0 8	0 14	0 7	0 9	0 0	0 17	0 14	0 7	0 5	0 12	0 0	0 0	0 6	0 3	0 0	0 1	0 0	0 7	0 0	0 0	0 2	0 0	0 1	0 2	0 12	0 5	0 0	0 0	0 0	0 0	0 0	0 0	0 1	4 0	0 0	0 2	0 0	2 0	1 0	0 0	0 1	0 2
tig00001299	1097478	T	G	0 19	0 19	0 39	0 0	0 8	0 17	0 7	0 9	0 0	0 18	0 14	0 7	0 5	0 14	0 0	0 0	0 6	0 4	0 0	0 1	0 0	0 7	0 0	0 0	0 2	0 0	0 2	0 4	0 12	0 6	0 0	0 0	0 0	0 0	0 0	0 0	0 1	0 5	0 0	0 2	0 0	0 2	0 1	0 0	0 1	0 2
tig00001299	1097485	C	T	0 19	0 20	0 37	0 0	0 8	0 17	0 7	0 9	0 0	0 18	0 14	0 7	0 5	2 12	0 0	0 0	0 6	0 4	0 0	0 1	0 0	0 7	0 0	0 0	0 3	0 0	0 2	0 5	0 12	0 7	0 0	0 0	0 0	0 0	0 0	0 0	0 0	5 0	0 0	0 2	0 0	2 0	0 1	0 0	0 1	0 2
tig00001299	1097487	ACCTCAGCT	A	0 0	0 9	0 14	0 0	0 0	0 0	0 0	0 0	0 0	0 0	0 0	0 0	0 0	0 0	0 0	0 0	0 0	0 4	0 0	0 1	0 0	0 0	0 0	0 0	0 3	0 0	0 2	0 5	0 0	0 7	0 0	0 0	0 0	0 0	0 0	0 0	0 1	0 4	0 0	0 2	0 0	0 3	0 1	0 0	0 0	0 2
tig00001299	1097496	CCTCAGCTC	T	0 0	0 9	0 14	0 0	0 0	0 0	0 0	0 0	0 0	0 0	0 0	0 0	0 0	0 0	0 0	0 0	0 0	0 4	0 0	0 1	0 0	0 0	0 0	0 0	0 3	0 0	0 2	0 5	0 0	0 7	0 0	0 0	0 0	0 0	0 0	0 0	0 1	0 4	0 0	0 2	0 0	0 3	0 1	0 0	0 0	0 2
tig00001299	1097509	G	A	0 0	0 9	0 20	0 0	0 0	0 0	0 0	0 0	0 0	0 0	0 0	0 0	0 0	0 0	0 0	0 0	0 0	0 0	0 0	0 0	0 0	0 0	0 0	0 0	0 0	0 0	0 0	0 0	0 0	0 7	0 0	0 1	0 0	0 0	0 0	0 0	0 1	0 0	0 0	0 0	0 0	1 0	0 1	0 0	0 0	0 0
tig00001299	1097521	C	T	0 0	0 8	0 19	0 0	0 0	0 6	0 0	0 0	0 0	0 3	0 0	0 2	0 0	0 5	0 0	0 0	0 0	0 3	0 0	0 1	0 0	0 0	0 0	0 0	0 3	0 0	0 2	0 5	0 0	0 7	0 0	0 1	0 0	0 0	0 0	0 0	0 1	0 5	0 0	0 2	0 0	0 3	0 1	0 0	0 0	0 2
tig00001299	1097527	C	A	0 0	0 9	0 18	0 0	0 0	0 6	0 0	0 0	0 0	0 3	0 0	0 2	0 0	0 5	0 0	0 0	0 0	0 3	0 0	0 1	0 0	0 0	0 0	0 0	0 3	0 0	0 2	0 5	0 0	0 7	0 0	0 1	0 0	0 0	0 0	0 0	0 1	0 5	0 0	0 2	0 0	0 3	0 1	0 0	0 0	0 2
tig00001299	1097532	G	A	0 0	0 11	0 20	0 0	0 0	0 6	0 0	0 0	0 0	0 3	0 0	0 2	0 0	0 4	0 0	0 0	0 0	0 3	0 0	0 1	0 0	0 0	0 0	0 0	0 3	0 0	0 2	0 5	0 0	0 2	0 0	0 0	0 0	0 0	0 0	0 0	0 3	0 5	0 0	0 2	0 0	0 3	0 1	0 0	0 0	0 2
tig00001299	1097534	GACA	AACG	0 0	0 0	0 0	0 0	0 0	0 0	0 0	0 0	0 0	0 0	0 0	0 0	0 0	0 0	0 0	0 0	0 0	0 0	0 0	0 0	0 0	0 0	0 0	0 0	0 0	0 0	0 0	0 0	0 0	0 0	0 0	0 0	0 0	0 0	0 0	0 0	0 2	0 5	0 0	0 0	0 0	0 3	0 0	0 0	0 0	0 0
tig00001299	1097537	A	G	0 0	9 0	17 0	0 0	0 0	6 0	0 0	0 0	0 0	3 0	0 0	2 0	0 0	2 0	0 0	0 0	0 0	1 0	0 0	1 0	0 0	0 0	0 0	0 0	3 0	0 0	2 0	4 0	0 0	1 0	0 0	0 0	0 0	0 0	0 0	0 0	0 2	0 5	0 0	0 0	0 0	0 3	1 0	0 0	0 0	0 0
tig00001299	1097544	G	A	0 0	0 9	0 21	0 0	0 0	0 6	0 0	0 0	0 0	0 3	0 0	0 2	0 0	0 1	0 0	0 0	0 0	0 2	0 0	0 1	0 0	0 0	0 0	0 0	0 3	0 0	0 2	0 4	0 0	0 2	0 0	0 0	0 0	0 0	0 0	0 0	0 3	0 5	0 0	0 2	0 0	0 2	0 1	0 0	0 0	0 2
tig00001299	1097548	G	A	0 0	6 0	12 0	0 0	0 0	2 0	0 0	0 0	0 0	0 0	0 0	0 0	0 0	0 0	0 0	0 0	0 0	0 0	0 0	0 0	0 0	0 0	0 0	0 0	1 0	0 0	0 0	2 0	0 0	0 0	0 0	0 0	0 0	0 0	0 0	0 0	0 0	0 0	0 0	0 0	0 0	0 0	1 0	0 0	0 0	0 0
tig00001299	1097549	TCAGCTGGG	T	0 0	0 0	0 0	0 0	0 0	0 0	0 0	0 0	0 0	0 0	0 0	0 0	0 0	0 0	0 0	0 0	0 0	0 0	0 0	0 0	0 0	0 0	0 0	0 0	0 0	0 0	0 0	0 0	0 0	0 0	0 0	0 0	0 0	0 0	0 0	0 0	0 0	0 0	0 0	0 0	0 0	0 0	0 0	0 0	0 0	0 0
tig00001299	1097580	C	T	0 0	0 7	0 25	0 0	0 0	0 0	0 0	0 0	0 0	0 0	0 0	0 0	0 0	0 0	0 0	0 0	0 0	0 0	0 0	0 0	0 0	0 0	0 0	0 0	0 0	0 0	0 0	0 0	0 0	0 0	0 0	0 0	0 0	0 0	0 0	0 0	0 0	0 0	0 0	0 0	0 0	0 0	0 0	0 0	0 0	0 0
tig00001299	1097582	G	A	0 0	0 7	0 24	0 0	0 0	0 0	0 0	0 0	0 0	0 0	0 0	0 0	0 0	0 0	0 0	0 0	0 0	0 0	0 0	0 0	0 0	0 0	0 0	0 0	0 0	0 0	0 0	0 0	0 0	0 0	0 0	0 0	0 0	0 0	0 0	0 0	0 0	0 0	0 0	0 0	0 0	0 0	0 0	0 0	0 0	0 0
tig00001299	1097602	G	A	0 0	0 7	15 14	0 0	0 0	0 0	0 0	0 0	0 0	0 0	0 0	0 0	0 0	0 0	0 0	0 0	0 0	0 0	0 0	0 0	0 0	0 0	0 0	0 0	0 0	0 0	0 0	0 0	0 0	0 0	0 0	0 0	0 0	0 0	0 0	0 0	0 0	0 0	0 0	0 0	0 0	0 0	0 0	0 0	0 0	0 0
tig00001299	1097603	G	A	0 0	0 7	0 30	0 0	0 0	0 0	0 0	0 0	0 0	0 0	0 0	0 0	0 0	0 0	0 0	0 0	0 0	0 0	0 0	0 0	0 0	0 0	0 0	0 0	0 0	0 0	0 0	0 0	0 0	0 0	0 0	0 0	0 0	0 0	0 0	0 0	0 0	0 0	0 0	0 0	0 0	0 0	1 0	0 0	0 0	0 0
tig00001299	1097612	G	T	0 0	0 7	0 30	0 0	0 0	0 0	0 0	0 0	0 0	0 0	0 0	0 0	0 0	0 0	0 0	0 0	0 0	0 0	0 0	0 0	0 0	0 0	0 0	0 0	0 0	0 0	0 0	0 0	0 0	0 0	0 0	0 0	0 0	0 1	0 0	0 0	0 0	0 0	0 0	0 0	0 0	0 0	0 1	0 0	0 0	0 0
tig00001299	1097617	G	C	0 0	0 7	0 33	0 0	0 0	0 0	0 0	0 0	0 0	0 0	0 0	0 0	0 0	0 0	0 0	0 0	0 0	0 0	0 0	0 0	0 0	0 0	0 0	0 0	0 0	0 0	0 0	0 0	0 0	0 0	0 0	0 0	0 0	0 1	0 0	0 0	0 0	0 0	0 0	0 2	0 0	0 0	0 1	0 0	0 0	0 0
tig00001299	1097619	C	T	0 0	0 7	0 31	0 0	0 0	0 0	0 0	0 0	0 0	0 0	0 0	0 0	0 0	0 0	0 0	0 0	0 0	0 0	0 0	0 0	0 0	0 0	0 0	0 0	0 0	0 0	0 0	0 0	0 0	0 0	0 0	0 0	0 0	0 1	0 0	0 0	0 0	0 0	0 0	0 0	0 0	0 0	0 1	0 0	0 0	0 0
tig00001299	1097637	CT	C	0 0	0 0	0 0	0 0	0 0	0 0	0 0	0 0	0 0	0 0	0 0	0 0	0 0	0 0	0 0	0 0	0 0	0 0	0 0	0 0	0 0	0 0	0 0	0 0	0 0	0 0	0 0	0 0	0 0	0 0	0 0	0 0	0 0	0 0	0 0	0 0	0 0	0 0	0 0	0 2	0 0	0 0	0 1	0 0	0 0	0 0
tig00001299	1097638	T	G	0 0	0 0	0 0	0 0	0 0	0 0	0 0	0 0	0 0	0 0	0 0	0 0	0 0	0 0	0 0	0 0	0 0	0 0	0 0	0 0	0 0	0 0	0 0	0 0	0 0	0 0	0 0	0 0	0 0	0 0	0 0	0 0	0 0	0 0	0 0	0 0	0 0	0 0	0 0	0 2	0 0	0 0	0 1	0 0	0 0	0 0
tig00001299	1097640	C	G	0 0	0 0	0 0	0 0	0 0	0 0	0 0	0 0	0 0	0 0	0 0	0 0	0 0	0 0	0 0	0 0	0 0	0 0	0 0	0 0	0 0	0 0	0 0	0 0	0 0	0 0	0 0	0 0	0 0	0 0	0 0	0 0	0 0	0 0	0 0	0 0	0 0	0 0	0 0	0 2	0 0	0 0	0 1	0 0	0 0	0 0
tig00001299	1097640	C	T	0 0	3 0	23 0	0 0	0 0	0 0	0 0	0 0	0 0	0 0	0 0	0 0	0 0	0 0	0 0	0 0	0 0	0 0	0 0	0 0	0 0	0 0	0 0	0 0	0 0	0 0	0 0	0 0	0 0	0 0	0 0	0 0	0 0	3 0	0 0	0 0	0 0	0 0	0 0	0 2	0 0	0 0	1 1	0 0	0 0	0 0
tig00001299	1097648	A	T	0 0	0 6	0 22	0 0	0 0	0 0	0 0	0 0	0 0	0 0	0 0	0 0	0 0	0 0	0 0	0 0	0 0	0 0	0 0	0 0	0 0	0 0	0 0	0 0	0 0	0 0	0 0	0 0	0 0	0 0	0 0	0 0	0 0	4 0	0 0	0 0	0 0	0 0	0 0	2 0	0 0	0 0	2 0	0 0	0 0	0 0
tig00001299	1097664	C	A	0 0	0 4	0 16	0 0	0 0	0 0	0 0	0 0	0 0	0 0	0 0	0 0	0 0	0 0	0 0	0 0	0 0	0 0	0 0	0 0	0 0	0 0	0 0	0 0	0 0	0 0	0 0	0 0	0 0	0 0	0 0	0 0	0 0	0 4	0 0	0 0	0 0	0 0	0 0	0 2	0 0	0 0	0 2	0 0	0 0	0 0
tig00001299	1097665	G	A	0 0	0 4	0 16	0 0	0 0	0 0	0 0	0 0	0 0	0 0	0 0	0 0	0 0	0 0	0 0	0 0	0 0	0 0	0 0	0 0	0 0	0 0	0 0	0 0	0 0	0 0	0 0	0 0	0 0	0 0	0 0	0 0	0 0	0 4	0 0	0 0	0 0	0 0	0 0	0 1	0 0	0 0	0 2	0 0	0 0	0 0
tig00001299	1097671	G	A	0 0	0 3	0 16	0 0	0 0	0 0	0 0	0 0	0 0	0 0	0 0	0 0	0 0	0 0	0 0	0 0	0 0	0 0	0 0	0 0	0 0	0 0	0 0	0 0	0 0	0 0	0 0	0 0	0 0	0 0	0 0	0 0	0 0	0 1	0 0	0 0	0 0	0 0	0 0	0 0	0 0	0 0	0 0	0 0	0 0	0 0
tig00001299	1097691	C	T	0 0	0 3	0 7	0 0	0 0	0 0	0 0	0 0	0 0	0 0	0 0	0 0	0 0	0 0	0 0	0 0	0 0	0 0	0 0	0 0	0 0	0 0	0 0	0 0	0 0	0 0	0 0	0 0	0 0	0 0	0 0	0 0	0 0	0 3	0 0	0 0	0 0	0 0	0 0	0 2	0 0	0 0	0 2	0 0	0 0	0 0
tig00001299	1097697	T	C	0 0	1 0	3 0	0 0	0 0	0 0	0 0	0 0	0 0	0 0	0 0	0 0	0 0	0 0	0 0	0 0	0 0	0 0	0 0	0 0	0 0	0 0	0 0	0 0	0 0	0 0	0 0	0 0	0 0	0 0	0 0	0 0	0 0	0 0	0 0	0 0	0 0	0 0	0 0	0 0	0 0	0 0	1 0	0 0	0 0	0 0
tig00001299	1097697	TG	CA	0 0	0 0	0 0	0 0	0 0	0 0	0 0	0 0	0 0	0 0	0 0	0 0	0 0	0 0	0 0	0 0	0 0	0 0	0 0	0 0	0 0	0 0	0 0	0 0	0 0	0 0	0 0	0 0	0 0	0 0	0 0	0 0	0 0	0 0	0 0	0 0	0 0	0 0	0 0	0 0	0 0	0 0	0 0	0 0	0 0	0 0
tig00001299	1097711	C	T	0 0	0 3	0 4	0 0	0 0	0 0	0 0	0 0	0 0	0 0	0 0	0 0	0 0	0 0	0 0	0 0	0 0	0 0	0 0	0 1	0 0	0 0	0 0	0 0	0 1	0 0	0 0	0 0	0 0	0 0	0 0	0 0	0 0	0 3	0 0	0 0	0 0	0 0	0 0	0 1	0 0	0 0	0 2	0 0	0 0	0 0
tig00001299	1097713	AT	A	0 0	0 0	0 0	0 0	0 0	0 0	0 0	0 0	0 0	0 0	0 0	0 0	0 0	0 0	0 0	0 0	0 0	0 0	0 0	0 0	0 0	0 0	0 0	0 0	0 0	0 0	0 0	0 0	0 0	0 0	0 0	0 0	0 0	0 0	0 0	0 0	0 0	0 0	0 0	0 0	0 0	0 0	0 0	0 0	0 0	0 0
tig00001299	1097714	TA	T	0 0	0 0	0 0	0 0	0 0	0 0	0 0	0 0	0 0	0 0	0 0	0 0	0 0	0 0	0 0	0 0	0 0	0 0	0 0	0 0	0 0	0 0	0 0	0 0	0 0	0 0	0 0	0 0	0 0	0 0	0 0	0 0	0 0	0 0	0 0	0 0	0 0	0 0	0 0	0 0	0 0	0 0	0 0	0 0	0 0	0 0
tig00001299	1097734	T	C	0 0	0 1	0 1	0 0	0 0	0 0	0 0	0 0	0 0	0 0	0 0	0 0	0 0	0 0	0 0	0 0	0 0	0 0	0 0	0 1	0 0	0 0	0 0	0 0	0 1	0 0	0 0	0 0	0 0	0 0	0 0	0 0	0 0	0 3	0 0	0 0	0 0	0 1	0 0	0 2	0 0	0 0	0 2	0 0	0 0	0 0
tig00001299	1097739	C	G	0 0	0 1	0 1	0 0	0 0	0 0	0 0	0 0	0 0	0 0	0 0	0 0	0 0	0 0	0 0	0 0	0 0	0 0	0 0	0 1	0 0	0 0	0 0	0 0	0 1	0 0	0 0	0 0	0 0	0 0	0 0	0 0	0 0	0 3	0 0	0 0	0 0	0 0	0 0	0 2	0 0	0 0	0 2	0 0	0 0	0 0
tig00001299	1097743	G	A	0 0	0 0	0 0	0 0	0 0	0 0	0 0	0 0	0 0	0 0	0 0	0 0	0 0	0 0	0 0	0 0	0 0	0 0	0 0	0 1	0 0	0 0	0 0	0 0	0 1	0 0	0 0	0 0	0 0	0 0	0 0	0 0	0 0	0 3	0 0	0 0	0 0	0 1	0 0	0 2	0 0	0 0	0 2	0 0	0 0	0 0
tig00001299	1097751	C	CG	0 0	0 0	0 0	0 0	0 0	0 0	0 0	0 0	0 0	0 0	0 0	0 0	0 0	0 0	0 0	0 0	0 0	0 0	0 0	0 0	0 0	0 0	0 0	0 0	0 0	0 0	0 0	0 0	0 0	0 0	0 0	0 0	0 0	0 0	0 0	0 0	0 0	0 0	0 0	0 0	0 0	0 0	0 0	0 0	0 0	0 0
tig00001299	1097757	A	AC	0 0	0 0	0 0	0 0	0 0	0 0	0 0	0 0	0 0	0 0	0 0	0 0	0 0	0 0	0 0	0 0	0 0	0 0	0 0	0 0	0 0	0 0	0 0	0 0	1 0	0 0	0 0	0 0	0 0	0 0	0 0	0 0	0 0	0 0	0 0	0 0	0 0	0 0	0 0	0 0	0 0	0 0	0 0	0 0	0 0	0 0
tig00001299	1097768	C	CG	0 0	0 0	0 0	0 0	0 0	0 0	0 0	0 0	0 0	0 0	0 0	0 0	0 0	0 0	0 0	0 0	0 0	0 0	0 0	0 0	0 0	0 0	0 0	0 0	0 0	0 0	0 0	0 0	0 0	0 0	0 0	0 0	0 0	0 0	0 0	0 0	0 0	0 0	0 0	0 0	0 0	0 0	0 0	0 0	0 0	0 0
tig00001299	1097815	CACC	ACCCG	0 0	0 0	0 0	0 0	0 0	0 0	0 0	0 0	0 0	0 0	0 0	0 0	0 0	0 0	0 0	0 0	0 0	0 0	0 0	0 0	0 0	0 0	0 0	0 0	0 0	0 0	0 0	0 0	0 0	0 0	0 0	0 0	0 0	0 0	0 0	0 0	0 0	0 0	0 0	0 0	0 0	0 0	0 0	0 0	0 0	0 0
tig00001299	1097828	GT	G	0 0	0 0	0 0	0 0	0 0	0 0	0 0	0 0	0 0	0 0	0 0	0 0	0 0	0 0	0 0	0 0	0 0	0 0	0 0	0 0	0 0	0 0	0 0	0 0	0 0	0 0	0 0	0 0	0 0	0 0	0 0	0 0	0 0	0 0	0 0	0 0	0 0	0 0	0 0	0 0	0 0	0 0	0 0	0 0	0 0	0 0
tig00001299	1097834	C	CG	0 0	0 0	0 0	0 0	0 0	0 0	0 0	0 0	0 0	0 0	0 0	0 0	0 0	0 0	0 0	0 0	0 0	0 0	0 0	0 0	0 0	0 0	0 0	0 0	0 0	0 0	0 0	0 0	0 0	0 0	0 0	0 0	0 0	0 0	0 0	0 0	0 0	0 0	0 0	0 0	0 0	0 0	0 0	0 0	0 0	0 0
tig00001299	1097840	A	AC	0 0	0 0	0 0	0 0	0 0	0 0	0 0	0 0	0 0	0 0	0 0	0 0	0 0	0 0	0 0	0 0	0 0	0 0	0 0	0 0	0 0	0 0	0 0	0 0	0 0	0 0	0 0	0 0	0 0	0 0	0 0	0 0	0 0	0 0	0 0	0 0	0 0	0 0	0 0	0 0	0 0	0 0	0 0	0 0	0 0	0 0
tig00001299	1097845	CTG	C	0 0	0 0	0 0	0 0	0 0	0 0	0 0	0 0	0 0	0 0	0 0	0 0	0 0	0 0	0 0	0 0	0 0	0 0	0 0	0 0	0 0	0 0	0 0	0 0	0 0	0 0	0 0	0 0	0 0	0 0	0 0	0 0	0 0	0 0	0 0	0 0	0 0	0 0	0 0	0 0	0 0	0 0	0 0	0 0	0 0	0 0
tig00001299	1097855	G	T	0 0	0 0	0 0	0 0	0 0	0 0	0 0	0 0	0 0	0 0	0 0	0 0	0 0	0 0	0 0	0 0	0 0	0 0	0 0	0 0	0 0	0 0	0 0	0 0	0 0	0 0	0 0	0 0	0 0	0 0	0 0	0 0	0 0	0 0	0 0	0 0	0 0	0 0	0 0	0 0	0 0	0 0	0 0	0 0	0 0	0 0
tig00001299	1097887	T	C	0 0	0 0	0 0	0 0	0 0	0 0	0 0	0 0	0 0	0 0	0 0	0 0	0 0	0 0	0 0	0 0	0 0	0 0	0 0	0 0	0 0	0 0	0 0	0 0	0 0	0 0	0 0	0 0	0 0	0 0	0 0	0 0	0 0	0 0	0 0	0 0	0 0	0 0	0 0	0 0	0 0	0 0	0 0	0 0	0 0	0 0
tig00001299	1097985	A	C	0 0	0 0	0 0	0 0	0 0	0 0	0 0	0 0	0 0	0 0	0 0	0 0	0 0	0 0	0 0	0 0	0 0	0 0	0 0	0 0	0 0	0 0	0 0	0 0	0 0	0 0	0 0	0 0	0 0	0 0	0 0	0 0	0 0	0 0	0 0	0 0	0 0	0 0	0 0	0 0	0 0	0 0	0 0	0 0	0 0	0 0
tig00001299	1098053	A	G	0 0	0 0	0 0	0 0	0 0	0 0	0 0	0 0	0 0	0 0	0 0	0 0	0 0	0 0	0 0	0 0	0 0	0 0	0 0	0 0	0 0	0 0	0 0	0 0	0 0	0 0	0 0	0 0	0 0	0 0	0 0	0 0	0 0	0 0	0 0	0 0	0 0	0 0	0 0	0 0	0 0	0 0	0 0	0 0	0 0	0 0
tig00001299	1098151	G	A	0 0	0 0	0 0	0 0	0 0	0 0	0 0	0 0	0 0	0 0	0 0	0 0	0 0	0 0	0 0	0 0	0 0	0 0	0 0	0 0	0 0	0 0	0 0	0 0	0 0	0 0	0 0	0 0	0 0	0 0	5 0	0 0	0 0	0 0	0 0	0 0	0 0	0 0	0 0	0 0	0 0	0 0	0 0	0 0	0 0	0 0
tig00001299	1098195	A	T	2 0	8 0	5 0	1 0	1 0	3 0	1 0	1 0	2 0	0 0	5 0	1 0	3 1	1 0	0 0	1 0	0 0	7 0	2 0	2 0	0 0	8 1	3 0	2 0	3 0	3 0	0 0	5 0	5 0	0 0	0 40	1 0	0 0	0 0	0 0	0 0	0 0	0 0	0 0	0 0	0 0	0 0	0 1	0 0	0 0	0 0
tig00001299	1098206	A	T	0 4	0 7	0 7	0 1	0 1	0 5	0 1	0 1	0 2	0 1	0 7	0 2	0 4	0 1	0 0	0 3	0 1	0 7	0 2	0 3	0 0	0 10	0 3	0 3	0 3	0 3	0 1	0 7	0 8	0 1	0 48	0 2	0 0	0 0	0 0	0 0	0 0	0 0	0 0	0 0	0 0	0 0	0 1	0 0	0 0	0 0
tig00001299	1098301	GGG	AAA	0 0	0 0	0 0	0 0	0 0	0 0	0 0	0 0	0 0	0 0	0 0	0 0	0 0	0 0	0 0	0 0	0 0	0 0	0 0	0 0	0 0	0 0	0 0	0 0	0 0	0 0	0 0	0 0	0 0	0 0	0 3	0 0	1 1	0 0	0 0	2 0	2 0	0 0	3 2	2 5	4 3	1 0	4 0	0 0	10 0	0 0
tig00001299	1098313	G	GAA	0 0	0 0	0 0	0 0	0 0	0 0	0 0	0 0	0 0	0 0	0 0	0 0	0 0	0 0	0 0	0 0	0 0	0 0	0 0	0 0	0 0	0 0	0 0	0 0	0 0	0 0	0 0	0 0	0 0	0 0	0 0	0 0	0 0	0 0	0 0	0 0	0 0	0 0	0 0	0 0	0 0	0 0	0 0	0 0	0 0	0 0
tig00001299	1098322	GGAG	AGAT	0 0	0 0	0 0	0 0	0 0	0 0	0 0	0 0	0 0	0 0	0 0	0 0	0 0	0 0	0 0	0 0	0 0	0 0	0 0	0 0	0 0	0 0	0 0	0 0	0 0	0 0	0 0	0 0	0 0	0 0	0 0	0 0	1 0	0 0	0 0	2 0	2 0	0 0	2 0	2 0	4 0	0 0	4 0	0 0	5 0	0 0
tig00001299	1098332	G	A	0 0	0 0	0 0	0 0	0 0	0 0	0 0	0 0	0 0	0 0	0 0	0 0	0 0	0 0	0 0	0 0	0 0	0 0	0 0	0 0	0 0	0 0	0 0	0 0	0 0	0 0	0 0	0 0	0 0	0 0	0 4	0 0	1 10	0 6	0 5	2 10	2 7	1 6	3 11	2 9	5 19	1 17	4 6	0 0	10 7	0 5
tig00001299	1098341	TT	AA	0 0	0 0	0 0	0 0	0 0	0 0	0 0	0 0	0 0	0 0	0 0	0 0	0 0	0 0	0 0	0 0	0 0	0 0	0 0	0 0	0 0	0 0	0 0	0 0	0 0	0 0	0 0	0 0	0 0	0 0	0 9	0 1	10 1	6 0	5 0	10 2	7 2	6 1	11 3	9 2	19 5	17 1	6 4	0 0	7 10	5 0
tig00001299	1098357	A	G	0 0	0 0	0 0	0 0	0 0	0 0	0 0	0 0	0 0	0 0	0 0	0 0	0 0	0 0	0 0	0 0	0 0	0 0	0 0	0 0	0 0	0 0	0 0	0 0	0 0	0 0	0 0	0 0	0 0	0 0	0 14	0 1	10 1	6 0	5 0	10 2	7 2	6 1	11 3	9 1	19 5	17 1	5 2	0 0	6 9	5 0
tig00001299	1098444	A	TG	0 0	0 0	0 0	0 0	0 0	0 0	0 0	0 0	0 0	0 0	0 0	0 0	0 0	0 0	0 0	0 0	0 0	0 0	0 0	0 0	0 0	0 0	0 0	0 0	0 0	0 0	0 0	0 0	0 0	0 0	0 20	0 0	8 1	2 3	4 1	8 0	7 0	4 1	5 3	2 2	13 3	12 4	4 2	0 0	3 4	3 0
tig00001299	1098458	G	T	0 0	0 0	0 0	0 0	0 0	0 0	0 0	0 0	0 0	0 0	0 0	0 0	0 0	0 0	0 0	0 0	0 0	0 0	0 0	0 0	0 0	0 0	0 0	0 0	0 0	0 0	0 0	0 0	0 0	0 0	12 13	0 4	0 10	0 4	0 6	0 11	0 8	0 5	0 6	0 4	0 17	0 20	0 7	0 0	0 8	0 5
tig00001299	1098470	AGA	GG	0 0	0 0	0 0	0 0	0 0	0 0	0 0	0 0	0 0	0 0	0 0	0 0	0 0	0 0	0 0	0 0	0 0	0 0	0 0	0 0	0 0	0 0	0 0	0 0	0 0	0 0	0 0	0 0	0 0	0 0	1 5	4 0	2 0	0 0	2 0	2 0	2 0	0 0	1 0	2 0	1 0	3 0	1 0	0 0	2 0	1 0
tig00001299	1098549	A	TT	0 0	0 0	0 0	0 0	0 0	0 0	0 0	0 0	0 0	0 0	0 0	0 0	0 0	0 0	0 0	0 0	0 0	0 0	0 0	0 0	0 0	0 0	0 0	0 0	0 0	0 0	0 0	0 0	0 0	0 0	0 10	0 7	6 0	2 3	3 0	8 0	6 0	4 0	5 0	2 0	9 1	11 1	2 0	0 0	4 0	3 0
tig00001299	1098551	T	G	0 0	0 0	0 0	0 0	0 0	0 0	0 0	0 0	0 0	0 0	0 0	0 0	0 0	0 0	0 0	0 0	0 0	0 0	0 0	0 0	0 0	0 0	0 0	0 0	0 0	0 0	0 0	0 0	0 0	0 0	0 10	0 7	0 6	0 3	0 4	0 9	0 5	0 6	0 7	0 7	0 14	0 13	0 5	0 0	0 5	0 3
tig00001299	1098566	TGTTGA	ATTGT	0 0	0 0	0 0	0 0	0 0	0 0	0 0	0 0	0 0	0 0	0 0	0 0	0 0	0 0	0 0	0 0	0 0	0 0	0 0	0 0	0 0	0 0	0 0	0 0	0 0	0 0	0 0	0 0	0 0	0 0	0 10	0 7	1 6	1 5	1 3	0 10	0 7	1 5	4 6	5 2	4 15	1 15	2 4	0 0	1 4	0 4
tig00001299	1098577	A	G	0 0	0 0	0 0	0 0	0 0	0 0	0 0	0 0	0 0	0 0	0 0	0 0	0 0	0 0	0 0	0 0	0 0	0 0	0 0	0 0	0 0	0 0	0 0	0 0	0 0	0 0	0 0	0 0	0 0	0 0	0 10	0 8	1 7	1 5	1 3	0 10	0 7	0 6	5 6	4 3	4 15	1 15	2 4	0 0	2 4	0 5
tig00001299	1098601	C	T	0 0	0 0	0 0	0 0	0 0	0 0	0 0	0 0	0 0	0 0	0 0	0 0	0 0	0 0	0 0	0 0	0 0	0 0	0 0	0 0	0 0	0 0	0 0	0 0	0 0	0 0	0 0	0 0	0 0	0 0	0 10	1 7	8 0	4 0	3 0	8 0	6 0	5 0	10 0	8 0	19 0	16 0	6 0	0 0	6 0	3 0
tig00001299	1098635	C	T	0 0	0 0	0 0	0 0	0 0	0 0	0 0	0 0	0 0	0 0	0 0	0 0	0 0	0 0	0 0	0 0	0 0	0 0	0 0	0 0	0 0	0 0	0 0	0 0	0 0	0 0	0 0	0 0	0 0	0 1	0 5	5 2	0 8	0 6	0 2	0 7	0 1	0 5	0 7	0 6	0 17	0 10	0 5	0 0	1 3	0 2
tig00001299	1098731	T	A	0 0	0 0	0 0	0 0	0 0	0 0	0 0	0 0	0 0	0 0	0 0	0 0	0 0	0 0	0 0	0 0	0 0	0 0	0 0	0 0	0 0	0 0	0 0	0 0	0 0	0 0	0 0	0 0	0 0	0 0	7 4	4 1	1 0	0 0	1 0	0 0	0 0	0 0	0 1	0 0	0 1	0 0	0 0	0 0	0 0	0 0
tig00001299	1098874	A	T	0 0	0 0	0 0	0 0	0 0	0 0	0 0	0 0	0 0	0 0	0 0	0 0	0 0	0 0	0 0	0 0	0 0	0 0	0 0	0 0	0 0	0 0	0 0	0 0	0 0	0 0	0 0	0 0	0 0	0 0	9 1	1 0	0 0	0 0	0 0	0 0	0 0	0 0	0 0	0 0	0 0	0 0	0 0	0 0	0 0	0 0
tig00001299	1098914	G	A	0 0	0 0	0 0	0 0	0 0	0 0	0 0	0 0	0 0	0 0	0 0	0 0	0 0	0 0	0 0	0 0	0 0	0 0	0 0	0 0	0 0	0 0	0 0	0 0	0 0	0 0	0 0	0 0	0 0	0 0	0 6	0 0	0 0	0 0	0 0	0 0	0 0	0 0	0 1	0 0	0 0	0 0	0 0	0 0	0 0	0 0
tig00001299	1098948	AAT	TG	0 0	0 0	0 0	0 0	0 0	0 0	0 0	0 0	0 0	0 0	0 0	0 0	0 0	0 0	0 0	0 0	0 0	0 0	0 0	0 0	0 0	0 0	0 0	0 0	0 0	0 0	0 0	0 0	0 0	0 0	0 0	0 0	0 0	0 0	0 0	0 0	0 0	0 0	0 0	0 0	0 0	0 0	0 0	0 0	0 0	0 0
tig00001299	1098975	A	T	0 0	0 0	0 0	0 0	0 0	0 0	0 0	0 0	0 0	0 0	0 0	0 0	0 0	0 0	0 0	0 0	0 0	0 0	0 0	0 0	0 0	0 0	0 0	0 0	0 0	0 0	0 0	0 0	0 0	0 0	0 1	0 0	0 0	0 0	0 0	0 0	0 0	0 0	0 1	0 1	0 0	0 0	0 0	0 0	0 0	0 0
tig00001299	1099009	A	C	0 0	0 0	0 0	0 0	0 0	0 0	0 0	0 0	0 0	0 0	0 0	0 0	0 0	0 0	0 0	0 0	0 0	0 0	0 0	0 0	0 0	0 0	0 0	0 0	0 0	0 0	0 0	0 0	0 0	0 0	0 1	0 0	0 0	0 0	0 0	0 0	0 0	0 0	0 1	0 1	0 0	0 0	0 0	0 0	0 0	0 0
tig00001299	1099012	C	A	0 0	0 0	0 0	0 0	0 0	0 0	0 0	0 0	0 0	0 0	0 0	0 0	0 0	0 0	0 0	0 0	0 0	0 0	0 0	0 0	0 0	0 0	0 0	0 0	0 0	0 0	0 0	0 0	0 0	0 0	0 1	0 0	0 0	0 0	0 0	0 0	0 0	0 0	1 0	1 0	0 0	0 0	0 0	0 0	0 0	0 0
tig00001299	1099091	C	T	0 0	0 0	0 0	0 0	0 0	0 0	0 0	0 0	0 0	0 0	0 0	0 0	0 0	0 0	0 0	0 0	0 0	0 0	0 0	0 0	0 0	0 0	0 0	0 0	0 0	0 0	0 0	0 0	0 0	0 0	0 0	0 0	0 0	0 0	0 0	0 0	0 0	0 0	0 0	0 0	0 0	0 0	0 0	0 0	0 0	0 0
tig00001299	1099166	C	T	0 0	0 0	0 0	0 0	0 0	0 0	0 0	0 0	0 0	0 0	0 0	0 0	0 0	0 0	0 0	0 0	0 0	0 0	0 0	0 0	0 0	0 0	0 0	0 0	0 0	0 0	0 0	0 0	0 0	0 2	0 2	0 0	0 0	0 0	0 0	0 0	0 0	0 0	0 0	0 0	0 0	0 0	0 0	0 0	0 0	0 0
tig00001299	1099182	CATT	TATA	0 0	0 0	0 0	0 0	0 0	0 0	0 0	0 0	0 0	0 0	0 0	0 0	0 0	0 0	0 0	0 0	0 0	0 0	0 0	0 0	0 0	0 0	0 0	0 0	0 0	0 0	0 0	0 0	0 0	0 1	0 4	0 0	0 0	0 0	0 0	0 0	0 0	0 0	0 0	0 0	0 0	0 0	0 0	0 0	0 0	0 0
tig00001299	1099228	T	TTA	0 0	0 0	0 0	0 0	0 0	0 0	0 0	0 0	0 0	0 0	0 0	0 0	0 0	0 0	0 0	0 0	0 0	0 0	0 0	0 0	0 0	0 0	0 0	0 0	0 0	0 0	0 0	0 0	0 0	0 0	0 5	0 0	0 0	0 0	0 0	0 0	0 0	0 0	0 0	0 0	0 0	0 0	0 0	0 0	0 0	0 0
tig00001299	1099499	C	CTG	0 0	0 0	0 0	0 0	0 0	0 0	0 0	0 0	0 0	0 0	0 0	0 0	0 0	0 0	0 0	0 0	0 0	0 0	0 0	0 0	0 0	0 0	0 0	0 0	0 0	0 0	0 0	0 0	0 0	0 0	0 0	0 0	0 0	0 0	0 0	0 0	0 0	0 0	0 0	0 0	0 0	0 0	0 0	0 0	0 0	0 0
tig00001299	1099637	C	CA	0 0	0 0	0 0	0 0	0 0	0 0	0 0	0 0	0 0	0 0	0 0	0 0	0 0	0 0	0 0	0 0	0 0	0 0	0 0	0 0	0 0	0 0	0 0	0 0	0 0	0 0	0 0	0 0	0 0	0 0	0 0	0 0	0 0	0 0	0 0	0 0	0 0	0 0	0 0	0 0	0 0	0 0	0 0	0 0	0 0	0 0
tig00001299	1099773	TC	T	0 0	0 0	0 0	0 0	0 0	0 0	0 0	0 0	0 0	0 0	0 0	0 0	0 0	0 0	0 0	0 0	0 0	0 0	0 0	0 0	0 0	0 0	0 0	0 0	0 0	0 0	0 0	0 0	0 0	0 0	0 0	0 0	0 0	0 0	0 0	0 0	0 0	0 0	0 0	0 0	0 0	0 0	0 0	0 0	0 0	0 0
tig00001299	1099817	G	T	0 0	0 0	0 0	0 0	0 0	0 0	0 8	0 0	0 0	0 0	0 0	0 0	0 0	0 0	0 0	0 0	0 0	0 0	0 0	0 0	0 0	0 0	0 0	0 0	0 0	0 0	0 0	0 0	0 0	0 0	0 0	0 0	0 0	0 0	0 0	0 0	0 0	0 0	0 0	0 0	0 0	0 0	0 1	0 0	0 0	0 0
tig00001299	1099840	T	G	0 0	0 0	0 0	0 0	0 0	0 0	8 0	0 0	0 0	0 0	0 0	0 0	0 0	0 0	0 0	0 0	0 0	0 0	0 0	0 0	0 0	0 0	0 0	0 0	0 0	0 0	0 0	0 0	0 0	0 0	0 0	0 0	0 0	0 0	0 0	0 0	0 0	0 0	0 0	0 0	0 0	0 0	2 0	0 0	0 0	0 0
tig00001299	1099867	C	T	0 0	0 0	0 0	0 0	0 0	0 0	0 8	0 0	0 0	0 0	0 0	0 0	0 0	0 0	0 0	0 0	0 0	0 0	0 0	0 0	0 0	0 0	0 0	0 0	0 0	0 0	0 0	0 0	0 0	0 0	0 1	0 0	0 0	0 0	0 0	0 0	0 0	0 0	0 0	0 0	0 0	0 0	0 2	0 0	0 0	0 0
tig00001299	1099872	C	A	0 0	0 0	0 0	0 0	0 0	0 0	0 8	0 0	0 0	0 0	0 0	0 0	0 0	0 0	0 0	0 0	0 0	0 0	0 0	0 0	0 0	0 0	0 0	0 0	0 0	0 0	0 0	0 0	0 0	0 0	0 1	0 0	0 0	0 0	0 0	0 0	0 0	0 0	0 0	0 0	0 0	0 0	0 2	0 0	0 0	0 0
tig00001299	1099890	G	A	0 0	0 0	0 0	0 0	0 0	0 0	0 3	0 0	0 0	0 0	0 0	0 0	0 0	0 0	0 0	0 0	0 0	0 0	0 0	0 0	0 0	0 0	0 0	0 0	0 0	0 0	0 0	0 0	0 0	0 0	0 1	0 0	0 0	0 0	0 0	0 0	0 0	0 0	0 0	0 0	0 0	0 0	0 2	0 0	0 0	0 0
tig00001299	1099892	A	G	0 0	0 0	0 0	0 0	0 0	0 0	0 3	0 0	0 0	0 0	0 0	0 0	0 0	0 0	0 0	0 0	0 0	0 0	0 0	0 0	0 0	0 0	0 0	0 0	0 0	0 0	0 0	0 0	0 0	0 0	0 1	0 0	0 0	0 0	0 0	0 0	0 0	0 0	0 0	0 0	0 0	0 0	0 2	0 0	0 0	0 0
tig00001299	1099898	G	A	0 0	0 0	0 0	0 0	0 0	0 0	0 0	0 0	0 0	0 0	0 0	0 0	0 0	0 0	0 0	0 0	0 0	0 0	0 0	0 0	0 0	0 0	0 0	0 0	0 0	0 0	0 0	0 0	0 0	0 0	0 0	0 0	0 0	0 0	0 0	0 0	0 0	0 0	0 0	0 0	0 0	0 0	0 0	0 0	0 0	0 0
tig00001299	1100056	C	CT	0 0	0 0	0 0	0 0	0 0	0 0	0 0	0 0	0 0	0 0	0 0	0 0	0 0	0 0	0 0	0 0	0 0	0 0	0 0	0 0	0 0	0 0	0 0	0 0	0 0	0 0	0 0	0 0	0 0	0 0	0 0	0 0	0 0	0 0	0 0	0 0	0 0	0 0	0 0	0 0	0 0	0 0	0 0	0 0	0 0	0 0
tig00001299	1100123	CT	C	0 0	0 0	0 0	0 0	0 0	0 0	0 0	0 0	0 0	0 0	0 0	0 0	0 0	0 0	0 0	0 0	0 0	0 0	0 0	0 0	0 0	0 0	0 0	0 0	0 0	0 0	0 0	0 0	0 0	0 0	0 0	0 0	0 0	0 0	0 0	0 0	0 0	0 0	0 0	0 0	0 0	0 0	0 0	0 0	0 0	0 0
tig00001299	1100136	C	CT	0 0	0 0	0 0	0 0	0 0	0 0	0 0	0 0	0 0	0 0	0 0	0 0	0 0	0 0	0 0	0 0	0 0	0 0	0 0	0 0	0 0	0 0	0 0	0 0	0 0	0 0	0 0	0 0	0 0	0 0	0 0	0 0	0 0	0 0	0 0	0 0	0 0	0 0	0 0	0 0	0 0	0 0	0 0	0 0	0 0	0 0
tig00001299	1100259	T	A	0 0	0 0	0 0	0 0	0 0	0 0	0 0	0 0	0 0	0 0	0 0	0 0	0 0	0 0	0 0	0 0	0 0	0 0	0 0	0 0	0 0	0 2	0 0	0 0	0 0	0 0	0 0	0 0	0 2	0 0	0 1	0 0	0 0	0 0	0 0	0 0	0 0	0 0	0 0	0 0	0 0	0 0	0 0	0 0	0 0	0 0
tig00001299	1100282	T	A	0 0	0 0	0 0	0 0	0 0	0 0	0 0	0 0	0 0	0 0	0 0	0 0	0 0	0 0	0 0	0 0	0 0	0 0	0 0	0 0	0 0	1 0	0 0	0 0	0 0	0 0	0 0	0 0	2 0	0 0	1 0	0 0	0 0	0 0	0 0	0 0	0 0	0 0	0 0	0 0	0 0	0 0	0 0	0 0	0 0	0 0
tig00001299	1100296	CCT	C	0 0	0 0	0 0	0 0	0 0	0 0	0 0	0 0	0 1	0 0	0 0	0 0	0 0	0 1	0 0	0 0	0 0	0 0	0 0	0 0	0 0	0 2	0 0	0 0	0 0	0 0	0 0	0 0	0 2	0 0	0 1	0 0	0 0	0 0	0 0	0 0	0 0	0 0	0 0	0 0	0 0	0 0	0 0	0 0	0 0	0 0
tig00001299	1100301	A	G	0 0	0 0	0 0	0 0	0 0	0 0	0 0	0 0	0 1	0 0	0 0	0 0	0 0	0 1	0 0	0 0	0 0	0 0	0 0	0 0	0 0	0 2	0 0	0 0	0 0	0 0	0 0	0 0	0 2	0 0	0 1	0 0	0 0	0 0	0 0	0 0	0 0	0 0	0 0	0 0	0 0	0 0	0 0	0 0	0 0	0 0
tig00001299	1100346	C	CA	0 0	0 0	0 0	0 0	0 0	0 0	0 0	0 0	0 0	0 0	0 0	0 0	0 0	0 0	0 0	0 0	0 0	0 0	0 0	0 0	0 0	0 0	0 0	0 0	0 0	0 0	0 0	0 0	0 0	0 0	0 0	0 0	0 0	0 0	0 0	0 0	0 0	0 0	0 0	0 0	0 0	0 0	0 0	0 0	0 0	0 0
tig00001299	1100348	T	TC	0 0	0 0	0 0	0 0	0 0	0 0	0 0	0 0	0 0	0 0	0 0	0 0	0 0	0 0	0 0	0 0	0 0	0 0	0 0	0 0	0 0	0 0	0 0	0 0	0 0	0 0	0 0	0 0	0 0	0 0	0 0	0 0	0 0	0 0	0 0	0 0	0 0	0 0	0 0	0 0	0 0	0 0	0 0	0 0	0 0	0 0
tig00001299	1100354	GC	AT	0 0	0 0	0 0	0 0	0 0	0 0	0 0	0 0	0 0	0 0	0 0	0 0	0 0	0 0	0 0	0 0	0 0	0 0	0 0	0 0	0 0	0 0	0 0	0 0	0 0	0 0	0 0	0 0	0 0	0 0	0 0	0 0	0 0	0 0	0 0	0 0	0 0	0 0	0 0	0 0	0 0	0 0	0 0	0 0	0 0	0 0
tig00001299	1100355	C	T	0 0	0 0	0 0	0 0	0 0	0 0	0 0	0 0	0 0	0 0	0 0	0 0	0 0	0 0	0 0	0 0	0 0	0 0	0 0	0 0	0 0	0 0	0 0	0 0	0 0	0 0	0 0	0 0	0 0	0 0	0 0	0 0	0 0	0 0	0 0	0 0	0 0	0 0	0 0	0 0	0 0	0 0	0 0	0 0	0 0	0 0
tig00001299	1100404	G	A	0 0	0 0	0 0	0 0	0 0	0 0	0 0	0 0	0 0	0 0	0 0	0 0	0 0	0 0	0 0	0 0	0 0	0 0	0 0	0 0	0 0	0 0	0 0	0 0	0 0	0 0	0 0	0 0	0 0	0 0	0 0	0 0	0 0	0 0	0 0	0 0	0 0	0 0	0 0	0 0	0 0	0 0	0 0	0 0	0 0	0 0
tig00001299	1100427	G	A	0 4	0 3	0 3	0 0	0 1	0 4	0 6	0 6	0 5	0 4	0 3	0 3	0 7	0 3	0 0	0 1	0 0	0 3	0 1	0 2	0 5	0 1	0 1	0 0	0 1	0 1	0 2	0 0	0 4	0 0	0 0	0 0	0 0	0 0	0 0	0 0	0 0	0 0	0 0	0 0	0 0	0 0	0 0	0 0	0 0	0 0
tig00001299	1100427	G	T	0 4	0 3	0 3	0 0	0 1	0 4	0 6	0 6	0 5	0 4	0 3	0 3	0 7	0 3	0 0	0 1	0 0	0 3	0 1	0 2	0 5	0 1	0 1	0 0	0 1	0 1	0 2	0 0	0 4	0 0	0 0	0 0	0 0	0 0	0 0	0 0	0 0	0 0	0 0	0 0	0 0	0 0	0 0	0 0	0 0	0 0
tig00001299	1100448	A	G	0 4	0 3	0 3	0 0	0 1	0 4	0 6	0 6	0 5	0 4	0 3	0 3	0 7	0 4	0 0	0 1	0 0	0 3	0 1	0 2	0 5	0 1	0 1	0 0	0 1	0 1	0 2	0 0	0 5	0 0	0 0	0 0	0 0	0 0	0 0	0 0	0 0	0 0	0 0	0 0	0 0	0 0	0 0	0 0	0 0	0 0
tig00001299	1100463	T	G	4 0	3 0	3 0	0 0	1 0	4 0	6 0	6 0	5 0	4 0	4 0	3 0	7 0	4 0	0 0	1 0	0 0	3 0	1 0	2 0	6 0	1 0	1 0	0 0	1 0	1 0	2 0	0 0	5 0	0 0	0 0	0 0	0 0	0 0	0 0	0 0	0 0	0 0	0 0	0 0	0 0	0 0	0 0	0 0	0 0	0 0
tig00001299	1100476	C	T	0 4	0 4	0 3	0 0	0 2	0 4	0 6	0 6	0 5	0 4	0 4	0 3	0 7	0 4	0 0	0 1	0 0	0 3	0 1	0 2	0 6	0 1	0 1	0 0	0 1	0 1	0 2	0 0	0 5	0 0	0 0	0 0	0 0	0 0	0 0	0 0	0 0	0 0	0 0	0 0	0 0	0 0	0 0	0 0	0 0	0 0
tig00001299	1100496	G	A	0 4	0 4	0 3	0 0	0 2	0 4	0 6	0 6	0 5	0 4	0 4	0 3	0 7	0 4	0 0	0 1	0 0	0 3	0 1	0 2	0 6	0 1	0 1	0 0	0 1	0 1	0 2	0 0	0 5	0 1	0 0	0 0	0 0	0 0	0 0	0 0	0 0	0 0	0 0	0 0	0 0	0 0	0 0	0 0	0 0	0 0
tig00001299	1100501	C	T	0 4	0 4	0 3	0 0	0 2	0 4	0 5	0 6	0 5	0 4	0 4	0 3	0 7	0 4	0 0	0 1	0 0	0 3	0 1	0 2	0 6	0 1	0 1	0 0	0 1	0 1	0 2	0 0	0 5	0 1	0 0	0 0	0 0	0 0	0 0	0 0	0 0	0 0	0 0	0 0	0 0	0 0	0 0	0 0	0 0	0 0
tig00001299	1100529	T	G	0 0	0 0	0 0	0 0	0 0	0 0	0 0	0 0	0 0	0 0	0 0	0 0	0 0	0 0	0 0	0 0	0 0	0 0	0 0	0 0	0 0	0 0	0 0	0 0	0 0	0 0	0 0	0 0	0 0	0 0	0 0	0 0	0 0	0 0	0 0	0 0	0 0	0 0	0 0	0 0	0 0	0 0	0 0	0 0	0 0	0 0
tig00001299	1100555	GG	AA	0 0	0 0	0 0	0 0	0 0	0 0	0 0	0 0	0 0	0 0	0 0	0 0	0 0	0 0	0 0	0 0	0 0	0 0	0 0	0 0	0 0	0 0	0 0	0 0	0 0	0 0	0 0	0 0	0 0	0 0	0 0	0 0	0 0	0 0	0 0	0 0	0 0	0 0	0 0	0 0	0 0	0 0	0 0	0 0	0 0	0 0
tig00001299	1100561	T	G	0 0	0 0	0 0	0 0	0 0	0 0	0 0	0 0	0 0	0 0	0 0	0 0	0 0	0 0	0 0	0 0	0 0	0 0	0 0	0 0	0 0	0 0	0 0	0 0	0 0	0 0	0 0	0 0	0 0	0 0	0 0	0 0	0 0	0 0	0 0	0 0	0 0	0 0	0 0	0 0	0 0	0 0	0 0	0 0	0 0	0 0
tig00001299	1100567	C	A	0 0	0 0	0 0	0 0	0 0	0 0	0 0	0 0	0 0	0 0	0 0	0 0	0 0	0 0	0 0	0 0	0 0	0 0	0 0	0 0	0 0	0 0	0 0	0 0	0 0	0 0	0 0	0 0	0 0	0 1	0 0	0 0	0 0	0 0	0 0	0 1	0 0	0 0	0 0	0 0	0 0	0 0	0 0	0 0	0 0	0 0
tig00001299	1100567	C	T	0 0	0 0	0 0	0 0	0 0	0 0	0 0	0 0	0 0	0 0	0 0	0 0	0 0	0 0	0 0	0 0	0 0	0 0	0 0	0 0	0 0	0 0	0 0	0 0	0 0	0 0	0 0	0 0	0 0	0 1	0 0	0 0	0 0	0 0	0 0	0 1	0 0	0 0	0 0	0 0	0 0	0 0	0 0	0 0	0 0	0 0
tig00001299	1100581	T	C	0 0	0 0	0 0	0 0	0 0	0 0	0 0	0 0	0 0	0 0	0 0	0 0	0 0	0 0	0 0	0 0	0 0	0 0	0 0	0 0	0 0	0 0	0 0	0 0	0 0	0 0	0 0	0 0	0 0	0 1	0 0	0 0	0 0	0 0	0 0	0 1	0 0	0 0	0 0	0 0	0 0	0 0	0 0	0 0	0 0	0 0
tig00001299	1100589	C	T	0 0	0 0	0 0	0 0	0 0	0 0	0 0	0 0	0 0	0 0	0 0	0 0	0 0	0 0	0 0	0 0	0 0	0 0	0 0	0 0	0 0	0 0	0 0	0 0	0 0	0 0	0 0	0 0	0 0	0 1	0 0	0 0	0 0	0 0	0 0	0 1	0 0	0 0	0 1	0 0	0 0	0 0	0 0	0 0	0 0	0 0
tig00001299	1100593	CC	GA	0 0	0 0	0 0	0 0	0 0	0 0	0 0	0 0	0 0	0 0	0 0	0 0	0 0	0 0	0 0	0 0	0 0	0 0	0 0	0 0	0 0	0 0	0 0	0 0	0 0	0 0	0 0	0 0	0 0	0 1	0 0	0 1	0 0	0 0	0 0	0 1	0 0	0 0	0 2	0 0	0 0	0 0	0 0	0 0	0 0	0 0
tig00001299	1100593	CC	TA	0 0	0 0	0 0	0 0	0 0	0 0	0 0	0 0	0 0	0 0	0 0	0 0	0 0	0 0	0 0	0 0	0 0	0 0	0 0	0 0	0 0	0 0	0 0	0 0	0 0	0 0	0 0	0 0	0 0	0 1	0 0	0 1	0 0	0 0	0 0	0 1	0 0	0 0	0 2	0 0	0 0	0 0	0 0	0 0	0 0	0 0
tig00001299	1100594	C	A	0 0	0 0	0 0	0 0	0 0	0 0	0 0	0 0	0 0	0 0	0 0	0 0	0 0	0 0	0 0	0 0	0 0	0 0	0 0	0 0	0 0	0 0	0 0	0 0	0 0	0 0	0 0	0 0	0 0	0 1	0 0	0 1	0 0	0 0	0 0	0 1	0 0	0 0	0 2	0 0	0 0	0 0	0 0	0 0	0 0	0 0
tig00001299	1100609	C	T	0 0	0 0	0 0	0 0	0 0	0 0	0 0	0 0	0 0	0 0	0 0	0 0	0 0	0 0	0 0	0 0	0 0	0 0	0 0	0 0	0 0	0 0	0 0	0 0	0 0	0 0	0 0	0 0	0 0	0 1	0 0	0 1	0 0	0 0	0 0	0 0	0 0	0 0	0 1	0 0	0 0	0 0	0 0	0 0	0 0	0 0
tig00001299	1100613	C	A	0 0	0 0	0 0	0 0	0 0	0 0	0 0	0 0	0 0	0 0	0 0	0 0	0 0	0 0	0 0	0 0	0 0	0 0	0 0	0 0	0 0	0 0	0 0	0 0	0 0	0 0	0 0	0 0	0 0	0 1	0 0	0 2	0 0	0 0	0 0	0 0	0 0	0 0	0 1	0 0	0 0	0 0	0 0	0 0	0 0	0 0
tig00001299	1100626	C	T	0 0	0 0	0 0	0 0	0 0	0 0	0 0	0 0	0 0	0 0	0 0	0 0	0 0	0 0	0 0	0 0	0 0	0 0	0 0	0 0	0 0	0 0	0 0	0 0	0 0	0 0	0 0	0 0	0 0	0 1	0 0	0 3	0 0	0 0	0 0	0 0	0 0	0 0	1 0	0 0	0 0	0 0	0 0	0 0	0 0	0 0
tig00001299	1100633	T	TGAA	0 0	0 0	0 0	0 0	0 0	0 0	0 0	0 0	0 0	0 0	0 0	0 0	0 0	0 0	0 0	0 0	0 0	0 0	0 0	0 0	0 0	0 0	0 0	0 0	0 0	0 0	0 0	0 0	0 0	0 1	0 0	0 3	0 0	0 0	0 0	0 0	0 0	0 0	0 0	0 0	0 0	0 0	0 0	0 0	0 0	0 0
tig00001299	1100639	T	G	0 0	0 0	0 0	0 0	0 0	0 0	0 0	0 0	0 0	0 0	0 0	0 0	0 0	0 0	0 0	0 0	0 0	0 0	0 0	0 0	0 0	0 0	0 0	0 0	0 0	0 0	0 0	0 0	0 0	0 0	0 0	0 0	0 0	0 0	0 0	0 0	0 0	0 0	0 0	0 0	0 0	0 0	0 0	0 0	0 0	0 0
tig00001299	1100646	C	T	0 0	0 0	0 0	0 0	0 0	0 0	0 0	0 0	0 0	0 0	0 0	0 0	0 0	0 0	0 0	0 0	0 0	0 0	0 0	0 0	0 0	0 0	0 0	0 0	0 0	0 0	0 0	0 0	0 0	0 1	0 1	0 3	0 1	0 0	0 0	0 0	0 0	0 0	0 0	0 0	0 0	0 0	0 0	0 0	0 0	0 0
tig00001299	1100647	C	T	0 0	0 0	0 0	0 0	0 0	0 0	0 0	0 0	0 0	0 0	0 0	0 0	0 0	0 0	0 0	0 0	0 0	0 0	0 0	0 0	0 0	0 0	0 0	0 0	0 0	0 0	0 0	0 0	0 0	0 1	0 1	0 3	0 1	0 0	0 0	0 0	0 0	0 0	0 0	0 0	0 0	0 0	0 0	0 0	0 0	0 0
tig00001299	1100681	C	T	0 0	0 0	0 0	0 0	0 0	0 0	0 0	0 0	0 0	0 0	0 0	0 0	0 0	0 0	0 0	0 0	0 0	0 0	0 0	0 0	0 0	0 0	0 0	0 0	0 0	0 0	0 0	0 0	0 0	0 1	0 1	0 5	0 2	0 0	0 0	0 0	0 0	0 0	0 0	0 0	0 0	0 0	0 0	0 0	0 0	0 1
tig00001299	1100688	T	C	0 0	0 0	0 0	0 0	0 0	0 0	0 0	0 0	0 0	0 0	0 0	0 0	0 0	0 0	0 0	0 0	0 0	0 0	0 0	0 0	0 0	0 0	0 0	0 0	0 0	0 0	0 0	0 0	0 0	1 0	1 0	3 2	0 2	0 0	0 0	0 0	0 0	0 0	2 0	0 0	0 0	0 0	0 0	0 0	0 0	1 0
tig00001299	1100702	G	A	0 0	0 0	0 0	0 0	0 1	0 0	0 0	0 0	0 0	0 0	0 1	0 0	0 0	0 0	0 0	0 1	0 0	0 0	0 0	0 0	0 0	0 0	0 2	0 0	0 0	0 0	0 0	0 0	0 0	0 1	0 1	0 5	0 11	0 7	0 3	0 4	0 6	0 7	0 20	0 9	0 8	0 20	0 6	0 7	0 16	0 9
tig00001299	1100706	G	A	0 0	0 0	0 0	0 0	0 1	0 0	0 0	0 0	0 0	0 0	0 1	0 0	0 0	0 0	0 0	0 1	0 0	0 0	0 0	0 0	0 0	0 0	0 2	0 0	0 0	0 0	0 0	0 0	0 0	0 1	0 1	2 3	9 2	8 0	4 0	4 0	6 0	7 0	5 13	3 6	8 0	20 0	5 0	8 0	17 0	8 0
tig00001299	1100728	A	G	0 0	0 0	0 0	0 0	0 0	0 0	1 0	0 0	0 0	0 0	0 0	0 0	0 0	0 0	0 0	0 0	0 0	0 0	0 0	0 0	0 0	0 0	0 0	0 0	0 0	0 0	0 0	0 0	0 0	0 0	0 0	4 0	2 9	0 8	0 3	0 4	0 6	0 7	0 20	0 9	0 8	0 20	0 6	0 8	0 16	0 8
tig00001299	1100734	C	T	0 0	0 0	0 0	0 0	0 0	0 0	0 0	0 0	0 0	0 0	0 0	0 0	0 0	0 0	0 0	0 0	0 0	0 0	0 0	0 0	0 0	0 0	0 0	0 0	0 0	0 0	0 0	0 0	0 0	0 0	0 0	0 0	0 9	0 8	0 3	0 4	0 6	0 7	0 20	0 9	0 8	0 20	0 6	0 8	0 16	0 8
tig00001299	1100741	G	GGCA	0 0	0 5	0 0	0 0	0 0	0 0	0 6	0 0	0 0	0 0	0 0	0 0	0 0	0 3	0 0	0 0	0 0	0 0	0 0	0 0	0 0	0 0	0 0	0 0	0 0	0 0	0 0	0 0	0 0	0 0	0 0	0 0	0 0	0 0	0 0	0 0	0 0	0 0	0 0	0 0	0 0	0 0	0 0	0 0	0 0	0 0
tig00001299	1100748	GCTGT	ACTAC	0 0	0 5	0 0	0 0	0 0	0 0	0 6	0 0	0 0	0 0	0 0	0 0	0 0	0 3	0 0	0 0	0 0	0 0	0 0	0 0	0 0	0 0	0 0	0 0	0 0	0 0	0 0	0 0	0 0	0 0	0 0	0 0	5 0	0 0	0 0	0 0	4 0	0 0	0 0	0 0	7 0	0 0	0 0	0 0	0 0	0 0
tig00001299	1100751	GT	AC	0 0	0 5	0 0	0 0	0 0	0 0	0 6	0 0	0 0	0 0	0 0	0 0	0 0	0 3	0 0	0 0	0 0	0 0	0 0	0 0	0 0	0 0	0 0	0 0	0 0	0 0	0 0	0 0	0 0	0 0	0 0	0 0	2 0	1 0	4 0	3 0	0 0	4 0	14 0	6 0	0 0	19 0	1 0	0 0	12 0	6 0
tig00001299	1100752	T	C	0 0	0 5	0 0	0 0	0 0	0 0	0 6	0 0	0 0	0 0	0 0	0 0	0 0	0 3	0 0	1 0	0 0	4 0	0 0	0 0	1 0	0 0	3 0	0 0	0 0	0 0	0 0	0 0	0 0	0 0	0 0	5 0	2 0	0 0	0 0	0 0	0 0	0 0	0 0	0 0	0 0	0 0	0 0	0 0	0 0	1 0
tig00001299	1100757	G	A	0 0	5 0	0 4	0 2	0 1	0 0	6 1	0 1	0 0	0 0	0 1	0 4	0 2	3 5	0 0	0 1	0 4	0 7	0 1	0 0	0 7	0 0	0 5	0 8	0 0	0 4	0 0	0 0	0 0	0 1	0 0	0 5	0 9	0 5	0 3	0 3	0 4	0 5	0 14	0 8	0 7	0 19	0 4	0 4	0 12	0 7
tig00001299	1100761	C	T	0 0	0 5	0 6	0 2	0 1	0 0	0 7	0 1	0 0	0 0	0 1	0 4	0 2	0 9	0 0	0 1	0 4	0 7	0 1	0 0	0 7	0 0	0 5	0 8	0 0	0 4	0 0	0 0	0 0	0 1	0 0	0 5	7 2	5 0	2 0	3 0	3 0	4 0	14 0	8 0	7 0	19 0	4 0	4 0	12 0	6 1
tig00001299	1100768	G	A	0 0	0 5	0 6	0 2	0 1	0 0	0 6	0 1	0 0	0 0	0 1	0 4	0 2	0 9	0 0	0 1	0 4	0 7	0 1	0 0	0 7	0 0	0 5	0 8	0 0	0 4	0 0	0 0	0 0	0 1	0 0	0 5	0 9	0 5	0 3	0 3	0 4	0 5	0 14	0 8	0 7	0 19	0 4	0 8	0 12	0 7
tig00001299	1100769	C	T	0 0	0 5	0 6	0 2	0 1	0 0	0 6	0 1	0 0	0 0	0 1	0 4	0 2	0 9	0 0	0 1	0 4	0 7	0 1	0 0	0 7	0 0	0 5	0 8	0 0	0 4	0 0	0 0	0 0	0 1	0 0	0 5	0 9	0 5	0 3	0 3	0 4	1 5	0 14	0 8	0 7	0 19	0 4	0 8	0 11	1 6
tig00001299	1100773	GAGTA	AAGTT	0 0	0 0	0 6	0 2	0 0	0 0	0 1	0 1	0 0	0 0	0 0	0 4	0 2	0 6	0 0	0 1	0 4	0 7	0 1	0 0	0 7	0 0	0 3	0 8	0 0	0 4	0 0	0 0	0 0	0 1	0 0	0 3	6 0	5 0	3 0	2 0	4 1	5 1	13 0	7 0	7 0	17 0	3 0	4 4	12 0	5 0
tig00001299	1100783	T	G	0 0	0 0	0 6	0 2	0 1	0 0	0 1	0 1	0 0	0 0	0 1	0 4	0 2	0 6	0 0	0 1	0 4	0 7	0 1	0 0	0 7	0 0	0 5	0 8	0 0	0 4	0 0	0 0	0 0	0 1	0 0	0 5	6 1	5 0	1 0	2 0	4 1	4 1	13 0	7 0	7 0	16 0	3 0	4 4	12 0	5 1
tig00001299	1100797	C	A	0 4	0 0	0 6	0 2	0 0	0 1	0 1	0 1	0 1	0 0	0 0	0 4	0 2	0 6	0 0	1 0	4 0	4 3	1 0	0 0	0 7	0 0	3 0	7 1	0 0	4 0	0 0	0 0	0 0	0 1	0 1	0 5	0 4	0 1	0 1	0 2	0 5	0 3	0 12	0 5	0 6	0 11	0 3	0 7	0 6	0 6
tig00001299	1100803	C	T	0 6	0 1	0 11	0 2	0 4	0 1	0 1	0 3	0 1	0 0	0 2	0 4	0 4	0 6	0 0	0 0	0 4	0 7	0 1	0 0	0 7	0 0	0 3	0 8	0 0	0 4	0 0	0 0	0 0	0 1	0 2	0 5	0 0	1 0	0 0	1 0	5 0	2 1	10 0	4 0	6 0	7 0	2 0	1 4	2 0	5 1
tig00001299	1100806	C	T	0 7	2 0	2 10	0 2	4 0	0 1	0 1	2 1	1 2	0 0	4 0	0 4	4 2	0 6	0 0	0 0	0 4	0 7	0 1	0 0	0 7	1 0	0 3	0 8	0 0	0 4	0 0	0 0	0 0	0 1	0 3	0 5	0 0	0 1	0 0	0 1	0 4	0 1	0 10	0 3	0 6	0 6	1 1	1 4	0 2	0 4
tig00001299	1100813	T	G	0 10	0 3	0 16	0 3	0 6	0 1	0 1	0 4	0 3	0 0	0 7	0 4	0 7	0 6	0 0	0 0	0 4	0 7	0 1	0 0	0 6	0 2	0 3	0 8	0 0	0 4	0 0	0 0	0 0	0 2	0 3	0 5	0 0	0 0	0 0	0 1	0 1	0 1	0 9	0 4	0 0	0 2	0 0	0 4	0 1	0 2
tig00001299	1100818	T	C	0 10	0 4	0 18	0 3	0 8	0 1	0 2	0 6	0 5	0 0	0 9	0 4	0 8	0 6	0 0	0 0	0 4	0 7	0 1	0 0	0 6	0 4	0 3	0 8	0 0	0 4	0 0	0 0	0 0	0 2	0 3	0 5	0 0	0 0	0 0	0 0	0 2	0 1	0 0	0 0	0 0	0 0	0 0	0 3	0 0	0 0
tig00001299	1100821	T	A	0 11	0 4	0 19	0 3	0 10	0 1	0 3	0 8	0 5	0 0	0 14	0 4	0 8	0 6	0 0	0 0	0 4	0 7	0 1	0 0	0 6	0 4	0 2	0 8	0 0	0 4	0 0	0 0	0 0	0 3	0 5	0 5	0 0	0 0	0 0	0 0	0 2	0 1	0 0	0 0	0 0	0 0	0 0	0 4	0 0	0 0
tig00001299	1100825	C	A	0 13	0 7	0 21	0 5	0 10	0 1	0 3	0 10	0 6	0 0	0 14	0 4	0 10	0 6	0 0	0 0	0 3	0 7	0 1	0 0	0 6	0 5	0 2	0 7	0 0	0 4	0 0	0 0	0 0	0 4	2 4	0 5	0 0	0 0	0 0	0 0	0 2	0 1	0 0	0 0	0 0	0 0	0 0	4 0	0 0	0 0
tig00001299	1100825	C	T	0 13	0 7	0 21	0 5	0 10	0 1	0 3	0 10	0 6	0 0	0 14	0 4	0 10	0 6	0 0	0 0	0 3	0 7	0 1	0 0	0 6	0 5	0 2	0 7	0 0	0 4	0 0	0 0	0 0	0 4	3 4	0 5	0 0	0 0	0 0	0 0	0 2	0 1	0 0	0 0	0 0	0 0	0 0	0 0	0 0	0 0
tig00001299	1100832	T	G	15 0	0 7	0 24	0 6	0 14	0 1	0 4	0 10	0 6	0 0	0 17	0 4	0 10	0 6	0 0	0 0	0 2	0 3	0 4	0 0	0 6	0 7	0 2	0 4	0 0	0 3	0 0	0 0	0 0	0 4	0 11	0 5	0 0	0 0	0 0	0 0	0 2	0 1	0 0	0 0	0 0	0 0	0 0	0 3	0 0	0 0
tig00001299	1100838	C	T	0 16	0 8	0 26	0 6	0 18	0 1	0 5	0 13	0 8	0 0	0 19	0 4	0 13	0 6	0 0	0 0	0 0	0 3	0 3	0 0	0 6	0 7	0 1	0 1	0 0	0 2	0 0	0 0	0 1	0 4	0 11	2 3	0 0	0 0	0 0	0 0	0 2	0 1	0 0	0 0	0 0	0 0	0 0	0 4	0 0	0 0
tig00001299	1100881	G	A	0 21	0 8	0 25	0 6	0 25	0 1	0 8	0 15	0 13	0 0	0 23	0 0	0 11	0 0	0 0	0 0	0 0	0 0	0 4	0 0	0 0	0 11	0 1	0 0	0 0	0 0	0 0	0 0	0 3	0 3	0 11	0 5	0 0	0 0	0 0	0 0	0 2	0 1	0 0	0 0	0 0	0 0	0 0	0 4	0 0	0 0
tig00001299	1100896	C	T	0 17	0 8	0 24	0 6	4 21	0 0	0 8	0 15	0 12	0 0	0 23	0 0	0 12	0 0	0 0	0 0	0 0	0 0	3 1	0 0	0 0	0 11	1 0	0 0	0 0	0 0	0 0	0 0	0 3	2 0	0 8	1 0	0 0	0 0	0 0	0 0	2 0	0 0	0 0	0 0	0 0	0 0	0 0	4 0	0 0	0 0
tig00001299	1100919	CA	C	9 0	1 0	10 0	1 0	13 0	0 0	6 0	7 0	6 0	0 0	2 0	0 0	6 0	0 0	0 0	0 0	0 0	0 0	2 0	0 0	0 0	3 0	0 0	0 0	0 0	0 0	0 0	0 0	3 0	0 0	0 0	0 0	0 0	0 0	0 0	0 0	0 0	0 0	0 0	0 0	0 0	0 0	0 0	0 0	0 0	0 0
tig00001299	1100930	ATATT	CTATC	6 0	0 0	3 0	1 0	9 0	0 0	5 0	4 0	2 0	0 0	2 0	0 0	2 0	0 0	0 0	0 0	0 0	0 0	0 0	0 0	0 0	0 0	0 0	0 0	0 0	0 0	0 0	0 0	3 0	0 0	0 0	0 0	0 0	0 0	0 0	0 0	0 0	0 0	0 0	0 0	0 0	0 0	0 0	0 0	0 0	0 0
tig00001299	1100945	C	T	0 2	0 0	0 0	0 0	0 1	0 0	0 0	0 0	0 1	0 0	0 1	0 0	0 0	0 0	0 0	0 0	0 0	0 0	0 0	0 0	0 0	0 0	0 0	0 0	0 0	0 0	0 0	0 0	0 1	0 0	0 0	0 0	0 0	0 0	0 0	0 0	0 0	0 0	0 0	0 0	0 0	0 0	0 0	0 0	0 0	0 0
tig00001299	1100954	C	A	0 0	0 0	0 0	0 0	0 0	0 0	0 0	0 0	0 0	0 0	0 0	0 0	0 0	0 0	0 0	0 0	0 0	0 0	0 0	0 0	0 0	0 0	0 0	0 0	0 0	0 0	0 0	0 0	0 1	0 0	0 0	0 0	0 0	0 0	0 0	0 0	0 0	0 0	0 0	0 0	0 0	0 0	0 0	0 0	0 0	0 0
tig00001299	1100959	AAAGT	GAAGC	0 0	0 0	0 0	0 0	0 0	0 0	0 0	0 0	0 0	0 0	0 0	0 0	0 0	0 0	0 0	0 0	0 0	0 0	0 0	0 0	0 0	0 0	0 0	0 0	0 0	0 0	0 0	0 0	0 0	0 0	0 0	0 0	0 0	0 0	0 0	0 0	0 0	0 0	0 0	0 0	0 0	0 0	0 0	0 0	0 0	0 0
tig00001299	1100991	G	A	0 0	0 0	0 2	0 0	0 0	0 0	0 0	0 0	0 0	0 0	0 0	0 0	0 0	0 0	0 0	0 0	0 0	0 0	0 0	0 0	0 0	0 0	0 0	0 0	0 0	0 0	0 0	0 0	0 0	0 1	0 0	0 0	0 0	0 5	0 0	0 1	0 2	0 0	0 0	0 0	0 1	0 0	0 0	0 0	0 0	0 1
tig00001299	1101015	AT	A	0 0	0 0	0 0	0 0	0 0	0 0	0 0	0 0	0 0	0 0	0 0	0 0	0 0	0 0	0 0	0 0	0 0	0 0	0 0	0 0	0 0	0 0	0 0	0 0	0 0	0 0	0 0	0 0	0 0	0 1	0 1	0 0	0 0	2 2	0 0	1 0	2 0	0 0	0 0	0 0	2 0	0 0	0 0	1 0	0 0	1 0
tig00001299	1101016	T	C	0 0	0 0	0 0	0 0	0 0	0 0	0 0	0 0	0 0	0 0	0 0	0 0	0 0	0 0	0 0	0 0	0 0	0 0	0 0	0 0	0 0	0 0	0 0	0 0	0 0	0 0	0 0	0 0	0 0	0 1	0 1	0 0	0 0	0 2	0 0	0 0	0 0	0 0	0 0	0 0	0 0	0 0	0 0	0 0	0 0	0 0
tig00001299	1101026	TAAAG	AAAAT	0 0	0 0	0 0	0 0	0 0	0 0	0 0	0 0	0 0	0 0	0 0	0 0	0 0	0 0	0 0	0 0	0 0	0 0	0 0	0 0	0 0	0 0	0 0	0 0	0 0	0 0	0 0	0 0	0 0	1 0	1 0	0 0	0 0	6 0	0 0	2 0	3 0	0 0	0 0	0 0	3 0	0 0	0 0	2 0	0 0	0 0
tig00001299	1101047	G	A	0 0	0 0	0 0	0 0	0 0	0 0	0 1	0 0	0 0	0 0	0 0	0 0	0 1	0 0	0 0	0 1	0 0	0 0	0 0	0 0	0 0	0 0	0 2	0 0	0 0	0 0	0 0	0 0	0 0	0 1	0 1	0 0	0 0	0 9	0 0	0 8	0 5	0 0	0 0	0 0	0 6	0 0	0 0	0 3	0 0	0 2
tig00001299	1101056	C	T	0 0	0 0	0 0	0 0	0 0	0 0	0 1	0 0	0 0	0 0	0 0	0 0	0 1	0 0	0 0	0 1	0 0	0 0	0 0	0 0	0 0	0 0	0 2	0 1	0 1	0 0	0 0	0 0	0 1	0 1	0 1	0 0	0 0	0 9	0 0	0 8	0 6	0 0	0 0	0 0	0 7	0 0	0 0	0 3	0 0	0 2
tig00001299	1101073	G	A	0 0	0 0	0 0	0 0	0 0	0 0	0 1	0 0	0 0	0 0	0 0	0 0	0 1	0 0	0 0	0 1	0 0	0 1	0 0	0 0	0 0	0 0	0 2	0 1	0 2	0 0	0 0	0 0	0 1	0 1	0 1	0 0	0 0	0 10	0 0	0 9	0 6	0 0	0 0	0 0	0 8	0 0	0 0	0 5	0 0	0 2
tig00001299	1101077	G	A	0 0	0 0	0 0	0 0	0 0	0 0	0 1	0 0	0 0	0 0	0 0	0 0	0 1	0 0	0 0	0 1	0 0	0 1	0 0	0 0	0 0	0 0	0 2	0 1	0 2	0 0	0 0	0 0	0 1	0 1	0 1	0 0	0 0	0 10	0 0	0 9	0 6	0 0	0 0	0 0	0 8	0 0	0 0	0 5	0 0	0 2
tig00001299	1101081	A	T	0 0	0 0	0 0	0 0	0 0	0 0	0 1	0 0	0 0	0 0	0 0	0 0	0 1	0 0	0 0	0 1	0 0	0 1	0 0	0 0	0 0	0 0	0 2	0 1	0 2	0 0	0 0	0 0	0 1	0 0	0 0	0 0	0 0	8 2	0 0	9 0	6 0	0 0	0 0	0 0	8 0	0 0	0 0	3 2	0 0	2 0
tig00001299	1101094	A	G	0 0	0 0	0 0	0 0	0 1	0 0	0 1	0 0	0 0	0 0	0 0	0 0	0 0	0 0	0 0	1 1	0 0	0 1	0 0	0 0	0 0	0 0	0 0	0 1	0 0	0 0	0 0	0 0	0 0	0 0	0 0	0 0	0 0	0 8	0 0	0 10	0 6	0 0	0 0	0 0	0 8	0 0	0 0	0 3	0 0	0 2
tig00001299	1101105	C	T	0 0	0 0	0 0	0 0	0 1	0 0	0 1	0 0	0 0	0 0	0 0	0 0	0 1	0 0	0 0	0 1	0 0	0 1	0 0	0 0	0 0	0 0	0 2	0 0	0 0	0 0	0 0	0 0	0 1	0 0	0 0	0 0	0 0	0 9	0 0	0 10	0 5	0 0	0 0	0 0	0 8	0 0	0 0	0 5	0 0	0 1
tig00001299	1101115	G	A	0 0	0 0	0 0	0 0	0 1	0 0	0 1	0 0	0 0	0 0	0 0	0 0	0 1	0 0	0 0	0 2	0 0	0 1	0 0	0 0	0 0	0 0	0 2	0 1	0 2	0 0	0 0	0 0	0 1	0 0	0 0	0 0	0 0	7 2	0 0	10 0	5 0	0 0	0 0	0 0	8 0	0 0	0 0	3 2	0 0	1 0
tig00001299	1101116	G	A	0 0	0 0	0 0	0 0	0 1	0 0	0 1	0 0	0 0	0 0	0 0	0 0	0 1	0 0	0 0	0 2	0 0	0 1	0 0	0 0	0 0	0 0	0 2	0 1	0 2	0 0	0 0	0 0	0 1	0 0	0 0	0 0	0 0	0 9	0 0	0 10	0 5	0 0	0 0	0 0	0 8	0 0	0 0	0 5	0 0	0 1
tig00001299	1101118	C	T	0 0	0 0	0 0	0 0	0 1	0 0	0 1	0 0	0 0	0 0	0 0	0 0	0 1	0 0	0 0	0 2	0 0	0 1	0 0	0 0	0 0	0 0	0 2	0 1	0 2	0 0	0 0	0 0	0 1	0 0	0 0	0 0	0 0	0 8	0 0	0 10	0 5	0 0	0 0	0 0	0 7	0 0	0 0	0 5	0 0	0 1
tig00001299	1101122	G	A	0 0	0 0	0 0	0 0	0 1	0 0	0 1	0 0	0 0	0 0	0 0	0 0	0 1	0 0	0 0	0 2	0 0	0 1	0 0	0 0	0 0	0 0	0 2	0 1	0 2	0 0	0 0	0 0	0 1	0 0	0 0	0 0	0 0	0 8	0 0	0 10	0 4	0 0	0 0	0 0	0 7	0 0	0 0	0 5	0 0	0 1
tig00001299	1101123	G	A	0 0	0 0	0 0	0 0	0 1	0 0	0 1	0 0	0 0	0 0	0 0	0 0	0 1	0 0	0 0	0 2	0 0	0 1	0 0	0 0	0 0	0 0	0 2	0 1	0 2	0 0	0 0	0 0	0 1	0 0	0 0	0 0	0 0	0 8	0 0	0 10	0 4	0 0	0 0	0 0	0 7	0 0	0 0	0 5	0 0	0 1
tig00001299	1101140	C	G	0 0	0 0	0 0	0 0	0 0	0 1	0 1	0 0	0 0	0 0	0 0	0 0	0 1	0 0	0 0	0 0	0 0	0 1	0 0	0 1	0 0	0 0	0 1	0 0	0 2	0 0	0 0	0 0	0 0	0 0	0 0	0 0	0 0	0 5	0 0	0 9	0 4	0 0	0 0	0 0	0 7	0 0	0 0	0 5	0 0	0 1
tig00001299	1101141	C	A	0 0	0 0	0 0	0 0	0 0	0 0	0 0	0 0	0 0	0 0	0 0	0 0	0 0	0 0	0 0	0 0	0 0	0 0	0 0	0 0	0 0	0 0	0 0	0 0	1 0	0 0	0 0	0 0	0 0	0 0	0 0	0 0	0 0	5 0	0 0	9 0	4 0	0 0	0 0	0 0	7 0	0 0	0 0	5 0	0 0	1 0
tig00001299	1101170	C	T	0 0	0 3	0 4	0 0	0 0	0 1	0 1	0 0	0 0	0 1	0 6	0 3	0 2	0 1	0 0	0 0	0 1	0 0	0 0	0 2	0 1	0 1	0 0	0 0	0 0	0 0	0 0	0 0	0 0	0 0	0 0	0 0	0 1	0 10	0 0	0 9	0 11	0 0	0 0	0 0	0 9	0 0	0 0	0 5	0 0	0 3
tig00001299	1101174	CA	TG	0 0	0 3	0 4	0 0	0 0	0 0	0 1	0 0	0 0	0 1	0 6	0 3	0 2	0 1	0 0	0 0	0 1	0 0	0 0	0 1	0 1	0 1	0 0	0 0	0 0	0 0	0 0	0 0	0 0	0 0	0 0	0 0	0 1	1 5	0 0	3 0	1 8	0 0	0 0	0 0	2 3	0 0	0 0	2 1	0 0	1 2
tig00001299	1101176	G	A	0 0	0 3	0 4	0 0	0 0	0 0	0 1	0 0	0 0	0 1	0 6	0 3	0 2	0 1	0 0	0 0	0 1	0 0	0 0	0 1	0 1	0 1	0 0	0 0	0 0	0 0	0 0	0 0	0 0	0 0	0 0	0 0	0 1	0 6	0 0	0 3	0 9	0 0	0 0	0 0	0 5	0 0	0 0	0 3	0 0	0 3
tig00001299	1101185	T	C	0 0	0 0	0 0	0 0	0 0	0 0	0 0	0 0	0 0	0 0	0 0	0 0	0 0	0 0	0 0	0 0	0 0	0 0	0 0	0 0	0 0	0 0	0 0	0 0	0 0	0 0	0 0	0 0	0 0	0 0	0 0	0 0	0 0	0 0	0 0	0 0	0 0	0 0	0 0	0 0	0 0	0 0	0 0	0 0	0 0	0 0
tig00001299	1101202	C	T	0 0	0 0	0 0	0 0	0 0	0 0	0 0	0 0	0 0	0 0	0 0	0 0	0 0	0 0	0 0	0 0	0 0	0 0	0 0	0 0	0 0	0 0	0 0	0 0	0 0	0 0	0 0	0 0	0 0	0 0	0 1	0 0	0 0	0 1	0 0	0 1	0 0	0 0	0 0	0 0	0 2	0 0	0 0	0 2	0 0	0 0
tig00001299	1101216	T	C	0 0	0 0	0 0	0 0	0 0	0 0	0 0	0 0	0 1	0 0	0 0	0 0	0 0	0 0	0 0	0 0	0 0	0 0	0 0	0 0	0 0	0 1	0 0	0 0	0 0	0 0	0 0	0 0	0 0	0 0	1 0	0 0	0 0	0 0	0 0	0 0	0 0	0 0	0 0	0 0	0 0	0 0	0 0	0 0	0 0	0 0
tig00001299	1101236	C	T	0 0	0 0	0 0	0 0	0 0	0 0	0 0	0 0	0 1	0 0	0 0	0 0	0 0	0 0	0 0	0 0	0 1	0 0	0 0	0 0	0 0	1 0	0 0	0 1	0 0	0 0	0 0	0 0	0 1	0 0	0 1	0 0	0 0	0 0	0 0	1 0	0 0	0 0	0 0	0 0	0 0	0 0	0 0	1 0	0 0	0 0
tig00001299	1101252	G	A	0 0	0 0	0 0	0 0	0 0	0 0	0 0	0 0	0 0	0 0	0 0	0 0	0 0	0 0	0 0	0 0	0 1	0 0	0 0	0 0	0 0	0 0	0 0	1 0	0 0	0 0	0 0	0 0	1 0	0 0	0 1	0 0	0 0	0 0	0 0	1 0	0 0	0 0	0 0	0 0	0 0	0 0	0 0	1 0	0 0	0 0
tig00001299	1101255	C	T	0 0	0 0	0 0	0 0	0 0	0 0	0 0	0 0	0 0	0 0	0 0	0 0	0 0	0 0	0 0	0 0	0 1	0 0	0 0	0 0	0 0	0 0	0 0	0 1	0 0	0 0	0 0	0 0	0 1	0 0	0 1	0 0	0 0	0 0	0 0	0 0	0 0	0 0	0 0	0 0	0 0	0 0	0 0	0 1	0 0	0 0
tig00001299	1101273	GCAC	ACAT	0 0	0 0	0 0	0 0	0 0	0 0	0 0	0 0	0 0	0 0	0 0	0 0	0 0	0 0	0 0	0 0	0 0	0 0	0 0	0 0	0 0	0 0	0 0	0 0	0 0	0 0	0 0	0 0	0 0	0 0	0 0	0 0	0 0	0 0	0 0	0 0	0 0	0 0	0 0	0 0	0 0	0 0	0 0	0 0	0 0	0 0
tig00001299	1101276	C	T	0 0	0 0	0 0	0 0	0 0	0 0	0 0	0 0	0 0	0 0	0 0	0 0	0 0	0 0	0 0	0 0	0 0	0 0	0 0	0 0	0 0	0 0	0 0	0 0	0 0	0 0	0 0	0 0	0 0	0 0	0 0	0 0	0 0	0 0	0 0	1 0	0 0	0 0	0 0	0 0	0 0	0 0	0 0	0 0	0 0	0 0
tig00001299	1101302	TAA	CAG	0 0	0 0	0 0	0 0	0 0	0 0	0 0	0 0	0 0	0 0	0 0	0 0	0 0	0 0	0 0	0 0	0 0	0 0	0 0	0 0	0 0	0 0	0 0	0 0	0 0	0 0	0 0	0 0	0 0	0 0	0 0	0 0	0 0	0 0	0 0	0 0	0 0	0 0	0 0	0 0	0 0	0 0	0 0	0 0	0 0	0 0
tig00001299	1101304	A	G	0 0	0 0	0 0	0 0	0 0	0 0	0 0	0 0	0 0	0 0	0 0	0 0	0 0	0 0	0 0	0 0	0 0	0 0	0 0	0 0	0 0	0 0	0 0	1 0	0 0	0 0	0 0	0 0	1 0	0 0	0 0	0 0	0 0	0 0	0 0	0 0	0 0	0 0	0 0	0 0	0 0	0 0	0 0	0 0	0 0	0 0
tig00001299	1101325	G	A	0 3	0 1	0 7	0 6	0 3	0 0	0 6	0 14	0 3	0 3	0 0	0 6	0 5	0 4	0 1	0 1	0 2	0 1	0 2	0 0	0 9	0 3	0 1	0 4	0 2	0 3	0 4	0 4	0 3	0 1	0 0	0 0	0 0	0 0	0 0	0 0	0 0	0 0	0 0	0 0	0 0	0 0	0 0	0 0	0 0	0 0
tig00001299	1101339	G	A	9 0	1 0	8 2	10 3	6 2	1 0	2 5	18 1	4 0	6 0	1 0	10 1	8 1	5 0	1 0	4 1	3 0	4 0	2 3	1 0	5 5	5 0	5 0	4 0	10 0	8 0	3 1	6 3	6 1	0 4	0 0	0 0	0 0	0 0	0 0	0 1	0 0	0 0	0 0	0 0	0 1	0 0	0 0	0 0	0 0	0 1
tig00001299	1101349	G	A	0 9	0 1	0 10	0 13	0 8	0 1	0 7	0 19	0 4	0 6	0 2	0 11	0 9	0 5	0 1	0 5	0 3	0 4	0 5	0 1	0 10	0 5	0 5	0 4	0 10	0 8	0 4	0 9	0 7	0 4	0 0	0 0	0 0	0 0	0 0	0 1	0 0	0 0	0 0	0 0	0 1	0 0	0 0	0 0	0 0	0 1
tig00001299	1101362	G	A	0 5	0 1	0 8	0 12	0 7	0 1	0 5	0 14	0 2	0 6	0 2	0 9	0 8	0 5	0 1	0 5	0 3	0 4	0 5	0 1	0 8	0 5	0 5	0 4	0 8	0 8	0 3	0 9	0 6	0 4	0 0	0 0	0 0	0 0	0 0	0 1	0 0	0 0	0 0	0 0	0 1	0 0	0 0	0 0	0 0	0 1
tig00001299	1101366	C	T	5 0	1 0	8 0	9 3	5 2	1 0	1 4	12 1	2 0	6 0	2 0	9 0	6 0	5 0	1 0	3 1	3 0	4 0	2 3	1 0	3 4	5 0	4 0	4 0	6 0	8 0	3 0	6 3	6 0	3 0	0 0	0 0	0 0	0 0	0 0	0 1	0 0	0 0	0 0	0 0	0 1	0 0	0 0	0 0	0 0	0 1
tig00001299	1101371	GCAC	ACAT	0 0	0 0	0 0	0 0	0 0	0 0	0 0	0 0	0 0	0 0	0 0	0 0	0 0	0 0	0 0	0 0	0 0	0 0	0 0	0 0	0 0	0 0	0 0	0 0	0 0	0 0	0 0	0 0	0 0	0 0	0 0	0 0	0 0	0 0	0 0	0 0	0 0	0 0	0 0	0 0	0 0	0 0	0 0	0 0	0 0	0 0
tig00001299	1101374	C	T	0 0	0 0	2 0	1 0	0 0	0 0	4 0	0 0	0 0	0 0	0 0	0 0	0 0	0 0	0 0	0 0	0 0	0 0	0 0	0 0	0 0	0 0	0 0	0 0	0 0	0 0	0 0	0 0	0 0	4 0	0 0	0 0	0 0	0 0	0 0	0 0	0 0	0 0	0 0	0 0	0 0	0 0	0 0	0 0	0 0	0 0
tig00001299	1101374	CGC	TGG	0 0	0 0	0 0	0 0	3 0	0 0	0 0	5 0	0 0	0 0	0 0	1 0	0 0	5 0	0 0	1 0	0 0	0 0	0 0	0 0	0 0	2 0	0 0	0 0	0 0	0 0	0 0	0 0	0 0	0 0	0 0	0 0	0 0	0 0	0 0	0 0	0 0	0 0	0 0	0 0	0 0	0 0	0 0	0 0	0 0	0 0
tig00001299	1101389	A	C	0 0	0 0	1 2	0 1	0 0	0 0	0 0	6 0	0 0	1 0	0 1	2 0	0 0	5 0	0 0	0 0	0 0	0 0	0 0	0 0	0 1	0 0	0 0	0 0	0 0	0 0	2 0	0 0	0 0	0 4	0 0	0 0	0 0	0 0	0 0	0 0	0 0	0 0	0 0	0 0	0 0	0 0	0 0	0 0	0 0	0 0
tig00001299	1101389	A	T	0 0	0 0	0 2	0 1	0 0	0 0	4 0	0 0	0 0	0 0	0 1	0 0	0 0	0 0	0 0	0 0	0 0	0 0	0 0	0 0	0 1	0 0	0 0	0 0	0 0	0 0	0 0	0 0	0 0	0 4	0 0	0 0	0 0	0 0	0 0	0 0	0 0	0 0	0 0	0 0	0 0	0 0	0 0	0 0	0 0	0 0
tig00001299	1101394	AA	GG	0 0	0 0	0 0	0 0	0 0	0 0	0 0	0 0	0 0	0 0	0 0	0 0	0 0	0 0	0 0	0 0	0 0	0 0	0 0	0 0	0 0	0 0	0 0	0 0	0 0	0 0	0 0	0 0	0 0	0 0	0 0	0 0	0 0	0 0	0 0	0 0	0 0	0 0	0 0	0 0	0 0	0 0	0 0	0 0	0 0	0 0
tig00001299	1101395	A	G	0 0	0 0	1 0	0 0	0 0	0 0	4 0	6 0	0 0	1 0	0 0	2 0	0 0	5 0	0 0	0 0	0 0	0 0	0 0	0 0	0 0	0 0	0 0	0 0	0 0	0 0	2 0	0 0	0 0	0 0	0 0	0 0	0 0	0 0	0 0	0 0	1 0	0 0	0 0	0 0	0 0	0 0	0 0	0 0	0 0	0 0
tig00001299	1101419	C	G	0 0	0 0	0 0	0 0	0 0	0 0	0 0	0 2	0 0	0 0	0 0	0 0	0 0	0 0	0 0	0 1	0 0	0 0	0 0	0 0	0 0	0 0	0 0	0 0	0 1	0 0	0 0	0 0	0 0	0 0	0 0	0 0	0 0	0 0	0 0	0 0	0 1	0 0	0 0	0 0	0 0	0 0	0 0	0 0	0 0	0 0
tig00001299	1101424	G	A	0 0	0 0	0 0	0 0	0 0	0 1	0 0	0 0	0 0	0 0	0 0	0 0	0 0	0 0	0 0	0 1	0 0	0 0	0 0	0 0	0 0	0 0	0 0	0 0	0 1	0 0	0 0	0 0	0 0	0 0	0 0	0 0	0 0	0 0	0 0	0 0	0 1	0 0	0 0	0 0	0 0	0 0	0 0	0 0	0 0	0 0
tig00001299	1101440	C	CGAGCCGAGCCGAGTT	0 0	0 1	0 0	0 0	0 0	0 1	0 3	0 0	0 0	0 0	0 1	0 0	0 1	0 0	0 0	0 0	0 0	0 0	0 0	0 0	0 1	0 0	0 0	0 0	0 0	0 0	0 0	0 1	0 1	0 0	0 0	0 0	0 0	0 0	0 0	0 0	0 0	0 0	0 0	0 0	0 0	0 0	0 0	0 1	0 0	0 0
tig00001299	1101449	C	CCGAGCCGAGT	0 0	0 1	0 0	0 0	0 0	0 1	0 3	0 0	0 0	0 0	0 1	0 0	0 1	0 0	0 0	0 0	0 0	0 0	0 0	0 0	0 1	0 0	0 0	0 0	0 0	0 0	0 0	0 1	0 1	0 0	0 0	0 0	0 0	0 0	0 0	0 0	0 0	0 0	0 0	0 0	0 0	0 0	0 0	0 1	0 0	0 0
tig00001299	1101457	A	G	0 1	0 0	0 0	0 0	0 0	0 0	0 2	0 0	0 0	0 2	0 0	0 0	0 0	0 1	0 0	0 0	0 1	0 0	0 0	0 0	0 2	0 1	0 0	0 0	0 0	0 0	0 0	0 0	0 0	0 0	0 0	0 0	0 0	0 0	0 0	0 0	0 1	0 0	0 0	0 0	0 0	0 0	0 0	0 0	0 0	0 0
tig00001299	1101457	AAGCCA	GAGCCC	0 1	0 0	0 0	0 0	0 0	0 0	0 2	0 0	0 0	0 2	0 0	0 0	0 0	0 1	0 0	0 0	0 1	0 0	0 0	0 0	0 2	0 1	0 0	0 0	0 0	0 0	0 0	0 0	0 0	0 0	0 0	0 0	0 0	0 0	0 0	0 0	0 1	0 0	0 0	0 0	0 0	0 0	0 0	0 0	0 0	0 0
tig00001299	1101478	C	T	1 1	1 4	4 2	0 0	0 0	1 1	3 1	2 0	0 0	0 1	0 1	0 0	0 1	1 3	0 0	0 0	0 2	0 1	0 0	0 1	0 3	1 0	0 1	0 0	0 1	0 0	0 3	0 2	0 1	0 0	0 0	0 0	0 0	0 0	0 0	0 0	0 0	0 0	0 0	0 0	0 0	0 0	0 0	0 2	0 0	0 0
tig00001299	1101490	G	T	1 0	1 0	3 2	0 0	0 0	1 0	3 0	1 0	0 0	0 0	0 0	0 0	0 0	1 0	0 0	0 0	1 0	0 0	0 0	0 0	0 0	1 0	0 0	0 0	0 0	0 0	0 3	1 0	0 0	0 0	0 0	0 0	0 0	0 0	0 0	0 0	0 0	0 0	0 0	0 0	0 0	0 0	0 0	0 0	0 0	0 0
tig00001299	1101492	T	C	0 0	0 0	0 2	0 0	0 0	0 0	0 0	0 0	0 0	0 0	0 0	0 0	0 0	0 0	0 0	0 0	0 0	0 0	0 0	0 0	0 0	0 0	0 0	0 0	0 0	0 0	0 3	0 0	0 0	0 0	0 0	0 0	0 0	0 0	0 0	0 0	0 0	0 0	0 0	0 0	0 0	0 0	0 0	0 0	0 0	0 0
tig00001299	1101497	C	T	0 1	0 1	0 6	0 0	0 0	0 1	0 3	0 2	0 0	0 1	0 0	0 0	0 0	0 1	0 0	0 0	0 1	0 0	0 0	0 0	0 0	0 1	0 1	0 0	0 0	0 0	0 3	0 1	0 0	0 0	0 0	0 0	0 0	0 0	0 0	0 0	0 0	0 0	0 0	0 0	0 0	0 0	0 0	0 0	0 0	0 0
tig00001299	1101500	C	T	0 1	0 1	0 6	0 0	0 0	0 1	0 3	0 2	0 0	0 1	0 0	0 0	0 0	0 1	0 0	0 0	0 1	0 0	0 0	0 0	0 0	0 1	0 1	0 0	0 0	0 0	0 3	0 1	0 0	0 0	0 0	0 0	0 0	0 0	0 0	0 0	0 0	0 0	0 0	0 0	0 0	0 0	0 0	0 0	0 0	0 0
tig00001299	1101519	G	A	0 0	0 0	0 0	0 0	0 0	0 0	0 0	0 0	0 0	0 0	0 0	0 0	0 0	0 0	0 0	0 0	0 0	0 0	0 0	0 0	0 0	0 0	0 0	0 0	0 0	0 0	0 0	0 1	0 0	0 0	0 0	0 0	0 0	0 0	0 0	0 0	0 0	0 0	0 0	0 0	0 0	0 0	0 0	0 0	0 0	0 0
tig00001299	1101537	G	T	0 0	0 0	0 0	0 0	0 0	0 0	0 0	0 0	0 0	0 0	0 0	0 0	0 0	0 0	0 0	0 0	0 0	0 0	0 0	0 0	0 0	0 0	0 0	0 0	0 0	0 0	0 0	0 0	0 0	0 0	0 0	0 0	0 0	0 0	0 0	0 0	0 0	0 0	0 0	0 0	0 0	0 0	0 0	0 0	0 0	0 0
tig00001299	1101540	C	T	0 0	0 0	0 0	0 0	0 0	0 0	0 0	0 0	0 0	0 0	0 0	0 0	0 0	0 0	0 0	0 0	0 0	0 0	0 0	0 0	0 0	0 0	0 0	0 0	0 0	0 0	0 0	0 0	0 0	0 0	0 0	0 0	0 0	0 0	0 0	0 0	0 0	0 0	0 0	0 0	0 0	0 0	0 0	0 0	0 0	0 0
tig00001299	1101548	GTGCCGT	AGGCCAG	0 0	0 0	0 0	0 0	0 0	0 0	0 0	0 0	0 0	0 0	0 0	0 0	0 0	0 0	0 0	0 0	0 0	0 0	0 0	0 0	0 0	0 0	0 0	0 0	0 0	0 0	0 0	0 0	0 0	0 0	0 0	0 0	0 0	0 0	0 0	0 0	0 0	0 0	0 0	0 0	0 0	0 0	0 0	0 0	0 0	0 0
tig00001299	1101561	A	T	0 0	0 0	0 0	0 0	0 0	0 0	0 0	0 0	0 0	0 0	0 0	0 0	0 0	0 0	0 0	0 0	0 0	0 0	0 0	0 0	0 0	0 0	0 0	0 0	0 0	0 0	0 0	0 0	0 0	0 0	0 0	0 0	0 0	0 0	0 0	0 0	0 0	0 0	0 0	0 0	0 0	0 0	0 0	0 0	0 0	0 0
tig00001299	1101567	C	T	0 0	0 0	0 0	0 0	0 0	0 0	0 0	0 0	0 0	0 0	0 0	0 0	0 0	0 0	0 0	0 0	0 0	0 0	0 0	0 0	0 0	0 0	0 0	0 0	0 0	0 0	0 0	0 0	0 1	0 0	0 1	0 0	0 0	0 0	0 0	0 0	0 0	0 0	0 0	0 0	0 0	0 0	0 0	0 0	0 0	0 0
tig00001299	1101579	G	T	0 0	0 0	0 0	0 0	0 0	0 0	0 0	0 0	0 0	0 0	0 0	0 0	0 0	0 0	0 0	0 0	0 2	0 0	0 0	0 0	0 1	0 0	0 0	0 0	0 0	0 0	0 0	0 0	0 6	0 0	0 2	0 0	0 0	0 0	0 0	0 0	0 0	0 0	0 0	0 0	0 0	0 0	0 0	0 0	0 0	0 0
tig00001299	1101588	G	A	0 0	0 0	0 0	0 0	0 0	0 0	0 0	0 0	0 0	0 0	0 0	0 0	0 0	0 0	0 0	0 0	0 2	0 0	0 0	0 0	0 1	0 0	0 0	0 0	0 0	0 0	0 0	0 0	0 6	0 0	0 2	0 0	0 0	0 0	0 0	0 0	0 0	0 0	0 0	0 0	0 0	0 0	0 0	0 0	0 0	0 0
tig00001299	1101589	C	T	0 0	0 0	0 0	0 0	0 0	0 0	0 0	0 0	0 0	0 0	0 0	0 0	0 0	0 0	0 0	0 0	0 2	0 0	0 0	0 0	0 1	0 0	0 0	0 0	0 0	0 0	0 0	0 0	0 6	0 0	0 2	0 0	0 0	0 0	0 0	0 0	0 0	0 0	0 0	0 0	0 0	0 0	0 0	0 0	0 0	0 0
tig00001299	1101595	G	T	0 0	0 0	0 0	0 0	0 0	0 0	0 0	0 0	0 0	0 0	0 0	0 0	0 0	0 0	0 0	0 0	0 2	0 0	0 0	0 0	0 1	0 0	0 0	0 0	0 0	0 0	0 0	0 0	0 6	0 0	0 2	0 0	0 0	0 0	0 0	0 0	0 0	0 0	0 0	0 0	0 0	0 0	0 0	0 0	0 0	0 0
tig00001299	1101596	GAC	AAA	0 0	0 0	0 0	0 0	0 0	0 0	0 0	0 0	0 0	0 0	0 0	0 0	0 0	0 0	0 0	0 0	0 2	0 0	0 0	0 0	0 1	0 0	0 0	0 0	0 0	0 0	0 0	0 0	0 6	0 0	0 2	0 0	0 0	0 0	0 0	0 0	0 0	0 0	0 0	0 0	0 0	0 0	0 0	0 0	0 0	0 0
tig00001299	1101606	G	A	0 0	0 0	0 1	0 0	0 0	0 0	0 0	0 0	0 0	0 0	0 0	0 0	0 0	0 0	0 0	0 0	0 2	0 0	0 0	0 0	0 1	0 0	0 0	0 0	0 0	0 0	0 0	0 0	0 6	0 0	0 2	0 0	0 0	0 0	0 0	0 0	0 0	0 0	0 0	0 0	0 0	0 0	0 0	0 0	0 0	0 0
tig00001299	1101608	C	G	0 0	0 0	0 1	0 0	0 0	0 0	0 0	0 0	0 0	0 0	0 0	0 0	0 0	0 1	0 0	0 0	0 2	0 0	0 0	0 0	0 1	0 0	0 0	0 0	0 0	0 1	0 0	0 0	0 6	0 0	0 2	0 0	0 0	0 0	0 0	0 0	0 0	0 0	0 0	0 0	0 0	0 0	0 0	0 0	0 0	0 0
tig00001299	1101615	C	T	0 0	0 0	0 1	0 0	0 0	0 0	0 0	0 0	0 0	0 0	0 0	0 0	0 0	0 1	0 0	0 0	0 2	0 0	0 0	0 0	0 0	0 0	0 0	0 0	0 0	0 1	0 0	0 0	0 5	0 0	0 0	0 0	0 0	0 0	0 0	0 0	0 0	0 0	0 0	0 0	0 0	0 0	0 0	0 0	0 0	0 0
tig00001299	1101616	T	C	0 0	0 0	0 1	0 0	0 0	0 0	0 0	0 0	0 0	0 0	0 0	0 0	0 0	0 1	0 0	0 0	0 2	0 0	0 0	0 0	0 1	0 0	0 0	0 0	0 0	0 1	0 0	0 0	0 5	0 0	0 1	0 0	0 0	0 0	0 0	0 0	0 0	0 0	0 0	0 0	0 0	0 0	0 0	0 0	0 0	0 0
tig00001299	1101618	G	A	0 0	0 0	0 1	0 0	0 0	0 0	0 0	0 0	0 0	0 0	0 0	0 0	0 0	0 1	0 0	0 0	0 2	0 0	0 0	0 0	0 0	0 0	0 0	0 0	0 0	0 1	0 0	0 0	0 5	0 0	0 1	0 0	0 0	0 0	0 0	0 0	0 0	0 0	0 0	0 0	0 0	0 0	0 0	0 0	0 0	0 0
tig00001299	1101633	C	A	0 0	0 0	0 1	0 0	0 0	0 0	0 0	0 0	0 0	0 0	0 0	0 0	0 0	0 1	0 0	0 0	0 0	0 0	0 0	0 0	0 0	0 0	0 0	0 0	0 0	0 1	0 0	0 0	0 0	0 0	0 1	0 0	0 0	0 0	0 0	0 0	0 0	0 0	0 0	0 0	0 0	0 0	0 0	0 0	0 0	0 0
tig00001299	1101634	C	T	0 0	0 0	0 1	0 0	0 0	0 0	0 0	0 0	0 0	0 0	0 0	0 0	0 0	0 1	0 0	0 0	0 0	0 0	0 0	0 0	0 0	0 0	0 0	0 0	0 0	0 1	0 0	0 0	0 0	0 0	0 1	0 0	0 0	0 0	0 0	0 0	0 0	0 0	0 0	0 0	0 0	0 0	0 0	0 0	0 0	0 0
tig00001299	1101635	A	G	0 0	0 0	0 0	0 0	0 0	0 0	0 0	0 0	0 0	0 0	0 0	0 0	0 0	0 0	0 0	0 0	0 0	0 0	0 0	0 0	0 0	0 0	0 0	0 0	0 0	0 0	0 0	0 0	0 0	0 0	2 0	0 0	0 0	0 0	0 0	0 0	0 0	0 0	0 0	0 0	0 0	0 0	0 0	0 0	0 0	0 0
tig00001299	1101639	G	A	0 0	0 0	0 1	0 0	0 0	0 0	0 0	0 0	0 0	0 0	0 0	0 0	0 0	0 1	0 0	0 0	0 0	0 0	0 0	0 0	0 0	0 0	0 0	0 0	0 0	0 1	0 0	0 0	0 0	0 0	0 2	0 0	0 0	0 0	0 0	0 0	0 0	0 0	0 0	0 0	0 0	0 0	0 0	0 0	0 0	0 0
tig00001299	1101645	G	A	0 0	0 0	0 1	0 0	0 0	0 0	0 0	0 0	0 0	0 0	0 0	0 0	0 0	0 1	0 0	0 0	0 0	0 0	0 0	0 0	0 0	0 0	0 0	0 0	0 0	0 1	0 0	0 0	0 0	0 0	0 3	0 0	0 0	0 0	0 0	0 0	0 0	0 0	0 0	0 0	0 0	0 0	0 0	0 0	0 0	0 0
tig00001299	1101649	G	A	0 0	0 0	0 1	0 0	0 0	0 0	0 0	0 0	0 0	0 0	0 0	0 0	0 0	0 1	0 0	0 0	0 0	0 0	0 0	0 0	0 0	0 0	0 0	0 0	0 0	0 1	0 0	0 0	0 0	0 0	0 3	0 0	0 0	0 0	0 0	0 0	0 0	0 0	0 0	0 0	0 0	0 0	0 0	0 0	0 0	0 0
tig00001299	1101650	GTCCA	ATCCG	0 0	0 0	0 0	0 0	0 0	0 0	0 0	0 0	0 0	0 0	0 0	0 0	0 0	0 0	0 0	0 0	0 0	0 0	0 0	0 0	0 0	0 0	0 0	0 0	0 0	0 0	0 0	0 0	0 0	0 0	0 0	0 0	0 0	0 0	0 0	0 0	0 0	0 0	0 0	0 0	0 0	0 0	0 0	0 0	0 0	0 0
tig00001299	1101653	C	T	0 0	0 0	0 0	0 0	0 0	0 0	0 0	0 0	0 0	0 0	0 0	0 0	0 0	0 0	0 0	0 0	0 0	0 0	0 0	0 0	0 0	0 0	0 0	0 0	0 0	0 0	0 0	0 0	0 0	0 0	0 0	0 0	0 0	0 0	0 0	0 0	0 0	0 0	0 0	0 0	0 0	0 0	0 0	0 0	0 0	0 0
tig00001299	1101654	A	G	0 0	0 0	1 0	0 0	0 0	0 0	0 0	0 0	0 0	0 0	0 0	0 0	0 0	1 0	0 0	0 0	0 0	0 0	0 0	0 0	0 0	0 0	0 0	0 0	0 0	1 0	0 0	0 0	0 0	0 0	0 0	0 0	0 0	0 0	0 0	0 0	0 0	0 0	0 0	0 0	0 0	0 0	0 0	0 0	0 0	0 0
tig00001299	1101661	A	G	0 0	0 0	0 1	0 0	0 0	0 0	0 0	0 0	0 0	0 0	0 0	0 0	0 0	0 1	0 0	0 0	0 0	0 0	0 0	0 0	0 0	0 0	0 0	0 0	0 0	0 1	0 0	0 0	0 0	0 0	4 0	0 0	0 0	0 0	0 0	0 0	0 0	0 0	0 0	0 0	0 0	0 0	0 0	0 0	0 0	0 0
tig00001299	1101668	GA	G	0 0	0 0	0 0	0 0	0 0	0 0	0 0	0 0	0 0	0 0	0 0	0 0	0 0	0 0	0 0	0 0	0 0	0 0	0 0	0 0	0 0	0 0	0 0	0 0	0 0	0 0	0 0	0 0	0 0	0 0	2 0	0 0	0 0	0 0	0 0	0 0	0 0	0 0	0 0	0 0	0 0	0 0	0 0	0 0	0 0	0 0
tig00001299	1101669	AGACT	GACC	0 0	0 0	0 0	0 0	0 0	0 0	0 0	0 0	0 0	0 0	0 0	0 0	0 0	0 0	0 0	0 0	0 0	0 0	0 0	0 0	0 0	0 0	0 0	0 0	0 0	0 0	0 0	0 0	0 0	0 0	0 0	0 0	0 0	0 0	0 0	0 0	0 0	0 0	0 0	0 0	0 0	0 0	0 0	0 0	0 0	0 0
tig00001299	1101672	CTA	GTG	0 0	0 0	0 0	0 0	0 0	0 0	0 0	0 0	0 0	0 0	0 0	0 0	0 0	0 0	0 0	0 0	0 0	0 0	0 0	0 0	0 0	0 0	0 0	0 0	0 0	0 0	0 0	0 0	0 0	0 0	0 0	0 0	0 0	0 0	0 0	0 0	0 0	0 0	0 0	0 0	0 0	0 0	0 0	0 0	0 0	0 0
tig00001299	1101674	A	G	0 0	0 0	0 0	0 0	0 0	0 0	0 0	0 0	0 0	0 0	0 0	0 0	0 0	0 0	0 0	0 0	0 0	0 0	0 0	0 0	0 0	0 0	0 0	0 0	0 0	0 0	0 0	0 0	0 0	0 0	0 0	0 0	0 0	0 0	0 0	0 0	0 0	0 0	0 0	0 0	0 0	0 0	0 0	0 0	0 0	0 0
tig00001299	1101678	G	A	0 0	0 0	0 0	0 0	0 0	0 0	0 0	0 0	0 0	0 0	0 0	0 0	0 0	1 0	0 0	0 0	0 0	0 0	0 0	0 0	0 0	0 0	0 0	0 0	0 0	1 0	0 0	0 0	0 0	0 0	0 6	0 0	0 0	0 0	0 0	0 0	0 0	0 0	0 0	0 0	0 0	0 0	0 0	0 0	0 0	0 0
tig00001299	1101680	G	A	0 0	0 0	0 0	0 0	0 0	0 0	0 0	0 0	0 0	0 0	0 0	0 0	0 0	0 1	0 0	0 0	0 0	0 0	0 0	0 0	0 0	0 0	0 0	0 0	0 0	0 1	0 0	0 0	0 0	0 0	0 6	0 0	0 0	0 0	0 0	0 0	0 0	0 0	0 0	0 0	0 0	0 0	0 0	0 0	0 0	0 0
tig00001299	1101685	T	C	0 0	0 0	0 0	0 0	0 0	0 0	0 0	0 0	0 0	0 0	0 0	0 0	0 0	0 1	0 0	0 0	0 0	0 0	0 0	0 0	0 0	0 0	0 0	0 0	0 0	0 1	0 0	0 0	0 0	0 0	0 6	0 0	0 0	0 0	0 0	0 0	0 0	0 0	0 0	0 0	0 0	0 0	0 0	0 0	0 0	0 0
tig00001299	1101715	C	T	0 0	0 0	0 0	0 0	0 0	0 0	0 0	0 0	0 0	0 0	0 0	0 0	0 0	0 0	0 0	0 0	0 0	0 0	0 0	0 0	0 0	0 0	0 0	0 0	0 0	0 0	0 0	0 0	0 0	0 0	0 5	0 0	0 0	0 0	0 0	0 0	0 0	0 0	0 0	0 0	0 0	0 0	0 0	0 0	0 0	0 0
tig00001299	1101717	G	A	0 0	0 0	0 0	0 0	0 0	0 0	0 0	0 0	0 0	0 0	0 0	0 0	0 0	0 0	0 0	0 0	0 0	0 0	0 0	0 0	0 0	0 0	0 0	0 0	0 0	0 0	0 0	0 0	0 0	0 0	0 5	0 0	0 0	0 0	0 0	0 0	0 0	0 0	0 0	0 0	0 0	0 0	0 0	0 0	0 0	0 0
tig00001299	1101724	T	C	0 0	0 0	0 0	0 0	0 0	0 0	0 0	0 0	0 0	0 0	0 0	0 0	0 0	0 0	0 0	0 0	0 0	0 0	0 0	0 0	0 0	0 0	0 0	0 0	0 0	0 0	0 0	0 0	0 0	0 0	0 5	0 0	0 0	0 0	0 0	0 0	0 0	0 0	0 0	0 0	0 0	0 0	0 0	0 0	0 0	0 0
tig00001299	1101726	C	T	0 0	0 0	0 0	0 0	0 0	0 0	0 0	0 0	0 0	0 0	0 0	0 0	0 0	0 0	0 0	0 0	0 0	0 0	0 0	0 0	0 0	0 0	0 0	0 0	0 0	0 0	0 0	0 0	0 0	0 0	0 5	0 0	0 0	0 0	0 0	0 0	0 0	0 0	0 0	0 0	0 0	0 0	0 0	0 0	0 0	0 0
tig00001299	1101750	A	G	0 0	0 0	0 0	0 0	0 0	0 0	0 0	0 0	0 0	0 0	0 0	0 0	0 0	0 0	0 0	0 0	0 0	0 0	0 0	0 0	0 0	0 0	0 0	0 0	0 0	0 0	0 0	0 0	0 0	0 0	2 0	0 0	0 0	0 0	0 0	0 0	0 0	0 0	0 0	0 0	0 0	0 0	0 0	0 0	0 0	0 0
tig00001299	1101761	C	T	0 0	0 0	0 0	0 0	0 0	0 0	0 0	0 0	0 0	0 0	0 0	0 0	0 0	0 0	0 0	0 0	0 0	0 0	0 0	0 0	0 0	0 0	0 0	0 0	0 0	0 0	0 0	0 0	0 0	0 0	0 0	0 0	0 0	0 0	0 0	0 0	0 0	0 0	0 0	0 0	0 0	0 0	0 0	0 0	0 0	0 0
tig00001299	1101791	G	A	0 0	0 0	0 0	0 0	0 0	0 0	0 0	0 0	0 0	0 0	0 0	0 0	0 0	0 0	0 0	0 0	0 0	0 0	0 0	0 0	0 0	0 0	0 0	0 0	0 0	0 0	0 0	0 0	0 0	0 0	0 0	0 0	0 0	0 0	0 0	0 0	0 0	0 0	0 0	0 0	0 0	0 0	0 0	0 0	0 0	0 0
tig00001299	1101806	G	A	0 0	0 2	0 0	0 0	0 0	0 2	0 2	0 2	0 1	0 3	0 1	0 0	0 0	0 2	0 0	0 0	0 0	0 0	0 0	0 0	0 0	0 0	0 1	0 2	0 1	0 0	0 0	0 0	0 1	0 0	0 0	0 0	0 0	0 0	0 0	0 0	0 0	0 0	0 0	0 0	0 0	0 0	0 0	0 0	0 0	0 0
tig00001299	1101813	A	G	0 0	0 2	0 0	0 0	0 0	0 2	0 2	0 2	0 1	0 3	0 1	0 0	0 1	0 2	0 0	0 0	0 1	0 0	0 0	0 0	0 0	0 0	0 1	0 3	0 2	0 0	0 0	0 0	0 1	0 0	0 1	0 0	0 0	0 0	0 0	0 0	0 0	0 0	0 0	0 0	0 0	0 0	0 0	0 0	0 0	0 0
tig00001299	1101822	G	A	0 0	0 2	0 0	0 0	0 0	0 2	0 2	0 2	0 1	0 3	0 1	0 0	0 1	0 2	0 0	0 0	0 2	0 0	0 0	0 0	0 0	0 0	0 1	0 3	0 2	0 0	0 0	0 0	0 1	0 0	0 2	0 0	0 0	0 0	0 0	0 0	0 0	0 0	0 0	0 0	0 0	0 0	0 0	0 0	0 0	0 0
tig00001299	1101834	G	A	0 0	0 2	0 0	0 0	0 0	0 2	0 2	0 2	0 1	0 3	0 1	0 0	0 1	0 3	0 0	0 0	0 2	0 0	0 0	0 0	0 0	0 0	0 1	0 3	0 2	0 0	0 0	0 0	0 1	0 0	0 2	0 0	0 0	0 0	0 0	0 0	0 0	0 0	0 0	0 0	0 0	0 0	0 0	0 0	0 0	0 0
tig00001299	1101835	G	A	0 0	0 2	0 0	0 0	0 0	0 2	0 2	0 2	1 0	0 3	0 1	0 0	0 1	0 3	0 0	0 0	0 2	0 0	0 0	0 0	0 0	0 0	0 1	0 3	0 2	0 0	0 0	0 0	0 1	0 0	0 2	0 0	0 0	0 0	0 0	0 0	0 0	0 0	0 0	0 0	0 0	0 0	0 0	0 0	0 0	0 0
tig00001299	1101844	G	A	0 0	0 2	0 0	0 0	0 0	0 2	0 1	0 2	0 1	0 3	0 1	0 0	0 1	0 3	0 0	0 0	0 2	0 0	0 0	0 0	0 0	0 0	0 1	0 3	0 2	0 0	0 0	0 0	0 1	0 0	0 2	0 0	0 0	0 0	0 0	0 0	0 0	0 0	0 0	0 0	0 0	0 0	0 0	0 0	0 0	0 0
tig00001299	1101867	G	A	0 0	0 2	0 0	0 0	0 0	0 2	0 1	0 2	0 1	0 3	0 1	0 0	1 0	0 3	0 0	0 0	2 0	0 0	0 0	0 0	0 0	0 0	0 1	0 3	0 2	0 0	0 0	0 0	0 1	0 2	0 2	0 0	0 0	0 0	0 0	0 0	0 0	0 0	0 0	0 0	0 0	0 0	0 0	0 0	0 0	0 0
tig00001299	1101928	CTGGTAGTCTCACC	TGATAGTCTCGCCA	0 0	0 0	0 0	0 0	0 0	0 0	0 0	0 0	0 0	0 0	0 0	0 0	0 0	0 0	0 0	0 0	0 0	0 0	0 0	0 0	0 0	0 0	0 0	0 0	0 0	0 0	0 0	0 0	0 0	0 0	0 0	0 0	0 0	0 0	0 0	0 0	0 0	0 0	0 0	0 0	0 0	0 0	0 0	0 0	0 0	0 0
tig00001299	1101928	CTGGTAGTCTCACC	TGGTAGTCTCACCA	0 0	0 0	0 0	0 0	0 0	0 0	0 0	0 0	0 0	0 0	0 0	0 0	0 0	0 0	0 0	0 0	0 0	0 0	0 0	0 0	0 0	0 0	0 0	0 0	0 0	0 0	0 0	0 0	0 0	0 0	0 0	0 0	0 0	0 0	0 0	0 0	0 0	0 0	0 0	0 0	0 0	0 0	0 0	0 0	0 0	0 0
tig00001299	1101978	G	A	0 0	0 0	0 0	0 0	0 0	0 0	0 0	0 0	0 0	0 0	0 0	0 0	0 0	0 0	0 0	0 0	0 0	0 0	0 0	0 0	0 0	0 0	0 0	0 0	0 0	0 0	0 0	0 0	0 0	0 0	0 0	0 0	0 0	0 0	0 0	0 0	0 0	0 0	0 0	0 0	0 0	0 0	0 0	0 0	0 0	0 0
tig00001299	1102008	GCTAGC	AGT	0 3	0 1	0 1	0 0	0 0	0 0	0 3	0 0	0 0	0 0	0 4	0 1	0 1	0 0	0 0	0 0	0 1	0 0	0 0	0 0	0 0	0 1	0 0	0 0	0 0	0 0	0 0	0 0	0 0	0 0	0 0	0 0	0 0	0 0	0 0	0 0	0 0	0 0	0 0	0 0	0 0	0 0	0 0	0 0	0 0	0 0
tig00001299	1102012	G	A	0 3	0 1	0 1	0 0	0 0	0 0	0 3	0 0	0 0	0 0	0 4	0 1	0 1	0 0	0 0	0 0	0 1	0 0	0 0	0 0	0 0	0 1	0 0	0 0	0 0	0 0	0 0	0 0	0 0	0 0	0 0	0 0	0 0	0 0	0 0	0 0	0 0	0 0	0 0	0 0	0 0	0 0	0 0	0 0	0 0	0 0
tig00001299	1102029	CGG	TGA	0 3	0 2	0 3	0 0	0 0	0 2	0 6	0 0	0 1	0 1	0 8	0 4	0 1	0 0	0 0	0 0	0 1	0 0	0 0	0 4	0 0	0 2	0 0	0 0	0 0	0 1	0 0	0 0	0 0	0 0	0 3	0 0	0 0	0 0	0 0	0 1	0 0	0 0	0 0	0 0	0 0	0 0	0 0	0 0	0 0	0 0
tig00001299	1102030	G	A	0 3	0 2	0 3	0 0	0 0	0 2	0 6	0 0	0 1	0 1	0 8	0 4	0 1	0 0	0 0	0 0	0 1	0 0	0 0	0 4	0 0	0 2	0 0	0 0	0 0	0 1	0 0	0 0	0 0	0 0	0 3	0 0	0 0	0 0	0 0	0 1	0 0	0 0	0 0	0 0	0 0	0 0	0 0	0 0	0 0	0 0
tig00001299	1102031	G	A	0 3	0 2	0 3	0 0	0 0	0 2	0 6	0 0	0 1	0 1	0 8	0 4	0 1	0 0	0 0	0 0	0 1	0 0	0 0	0 4	0 0	0 2	0 0	0 0	0 0	0 1	0 0	0 0	0 0	0 0	0 3	0 0	0 0	0 0	0 0	0 1	0 0	0 0	0 0	0 0	0 0	0 0	0 0	0 0	0 0	0 0
tig00001299	1102035	G	A	0 3	0 2	0 3	0 0	0 0	0 2	0 6	0 0	0 1	0 1	0 9	0 4	0 1	0 0	0 0	0 0	0 1	0 0	0 0	0 4	0 0	0 2	0 0	0 0	0 0	0 1	0 0	0 0	0 0	0 0	0 4	0 0	0 0	0 0	0 0	0 1	0 0	0 0	0 0	0 0	0 0	0 0	0 0	0 0	0 0	0 0
tig00001299	1102046	G	A	0 3	0 2	0 3	0 0	0 0	0 2	0 6	0 0	0 1	0 1	0 9	0 4	0 1	0 0	0 0	0 0	0 0	0 0	0 0	0 4	0 0	0 2	0 0	0 0	0 0	0 1	0 0	0 0	0 0	0 0	0 4	0 0	0 0	0 0	0 0	0 1	0 0	0 0	0 0	0 0	0 0	0 0	0 0	0 0	0 0	0 0
tig00001299	1102051	T	G	0 3	0 2	0 3	0 0	0 0	0 2	0 6	0 0	0 1	0 1	0 8	0 4	0 0	0 0	0 0	0 0	0 0	0 0	0 0	4 0	0 0	0 2	0 0	0 0	0 0	0 1	0 0	0 0	0 0	0 0	5 0	0 0	0 0	0 0	0 0	0 1	0 0	0 0	0 0	0 0	0 0	0 0	0 0	0 0	0 0	0 0
tig00001299	1102063	G	A	0 3	0 2	0 3	0 0	0 0	0 2	0 6	0 0	0 0	0 0	0 8	0 4	0 1	0 0	0 0	0 0	0 0	0 0	0 0	0 4	0 0	0 2	0 0	0 0	0 0	0 1	0 0	0 0	0 0	0 0	0 7	0 0	0 0	0 0	0 0	0 1	0 0	0 0	0 0	0 0	0 0	0 0	0 0	0 0	0 0	0 0
tig00001299	1102069	A	C	0 3	0 2	0 2	0 0	0 0	0 1	0 6	0 0	0 0	0 0	0 9	0 4	0 1	0 0	0 0	0 0	0 0	0 0	0 0	0 4	0 0	0 2	0 0	0 0	0 0	0 0	0 0	0 0	0 0	0 0	5 2	0 0	0 0	0 0	0 0	0 0	0 0	0 0	0 0	0 0	0 0	0 0	0 0	0 0	0 0	0 0
tig00001299	1102069	ATGT	CTGA	0 3	0 2	0 2	0 0	0 0	0 1	0 6	0 0	0 0	0 0	0 9	0 4	0 1	0 0	0 0	0 0	0 0	0 0	0 0	0 4	0 0	0 2	0 0	0 0	0 0	0 0	0 0	0 0	0 0	0 0	0 2	0 0	0 0	0 0	0 0	0 0	0 0	0 0	0 0	0 0	0 0	0 0	0 0	0 0	0 0	0 0
tig00001299	1102077	G	A	0 3	0 2	0 2	0 0	0 0	0 1	0 6	0 0	0 0	0 0	0 9	0 4	0 1	0 0	0 0	0 0	0 0	0 0	0 0	0 4	0 0	0 2	0 0	0 0	0 0	0 1	0 0	0 0	0 0	0 0	0 7	0 0	0 0	0 0	0 0	0 1	0 0	0 0	0 0	0 0	0 0	0 0	0 0	0 0	0 0	0 0
tig00001299	1102080	A	G	0 3	0 2	0 2	0 0	0 0	0 1	0 5	0 0	0 0	0 0	0 8	0 4	0 1	0 0	0 0	0 0	0 0	0 0	0 0	0 4	0 0	0 2	0 0	0 0	0 0	0 1	0 0	0 0	0 0	0 0	5 2	0 0	0 0	0 0	0 0	0 1	0 0	0 0	0 0	0 0	0 0	0 0	0 0	0 0	0 0	0 0
tig00001299	1102101	A	G	3 0	0 0	2 0	0 0	0 0	1 0	0 0	0 0	0 0	0 0	4 0	2 0	1 0	0 0	0 0	0 0	0 0	0 0	0 0	0 4	0 0	2 0	0 0	0 0	0 0	1 0	0 0	0 0	0 0	0 0	0 5	0 0	0 0	0 0	0 0	0 1	0 0	0 0	0 0	0 0	0 0	0 0	0 0	0 0	0 0	0 0
tig00001299	1102137	GTGG	ATGA	0 0	0 0	0 0	0 0	0 0	0 0	0 0	0 0	0 0	0 0	0 0	0 0	0 0	0 0	0 0	0 0	0 0	0 0	0 0	0 0	0 0	0 0	0 0	0 0	0 0	0 0	0 0	0 0	0 0	0 0	0 2	0 0	0 0	0 0	0 0	0 1	0 0	0 0	0 0	0 0	0 0	0 0	0 0	0 0	0 0	0 0
tig00001299	1102156	A	G	0 0	0 0	0 0	0 0	0 0	0 0	0 0	0 0	0 0	0 0	0 0	0 0	0 0	0 0	0 0	0 0	0 0	0 0	0 0	0 0	0 0	0 0	0 0	0 0	0 0	0 0	0 0	0 0	0 0	0 0	0 0	0 0	0 0	0 0	0 0	0 0	0 0	0 0	0 0	0 0	0 0	0 0	0 0	0 0	0 0	0 0
tig00001299	1102176	T	A	0 0	0 0	0 0	0 0	0 0	0 0	0 0	0 0	0 0	0 0	0 0	0 0	0 0	0 0	0 0	0 0	0 0	0 0	0 0	0 0	0 0	0 0	0 0	0 0	0 0	0 0	0 0	0 0	0 0	0 0	0 0	0 0	1 0	0 0	0 0	0 0	0 0	0 0	0 0	0 0	0 0	0 0	1 0	1 0	0 0	0 0
tig00001299	1102193	C	T	0 0	0 0	0 0	0 0	0 0	0 0	0 0	0 0	0 0	0 0	0 0	0 0	0 0	0 0	0 0	0 0	0 0	0 0	0 0	0 0	0 0	0 0	0 0	0 0	0 0	0 0	0 0	0 0	0 0	0 0	0 0	0 0	0 1	0 6	0 3	0 2	0 0	0 0	0 0	0 0	0 0	0 0	0 3	0 2	0 2	0 0
tig00001299	1102195	G	A	0 0	0 0	0 0	0 0	0 0	0 0	0 0	0 0	0 0	0 0	0 0	0 0	0 0	0 0	0 0	0 0	0 0	0 0	0 0	0 0	0 0	0 0	0 0	0 0	0 0	0 0	0 0	0 0	0 0	0 0	0 0	0 0	0 2	0 6	0 2	0 3	0 1	0 0	0 0	0 0	0 1	0 0	0 3	0 2	0 2	0 0
tig00001299	1102202	A	G	0 0	0 0	0 0	0 0	0 0	0 0	0 0	0 0	0 0	0 0	0 0	0 0	0 0	0 0	0 0	0 0	0 0	0 0	0 0	0 0	0 0	0 0	0 0	0 0	0 0	0 0	0 0	0 0	0 0	0 0	0 0	0 0	3 0	0 0	0 0	1 0	0 0	0 0	1 0	0 0	1 0	0 0	0 0	0 0	0 0	0 0
tig00001299	1102202	AC	GT	0 0	0 0	0 0	0 0	0 0	0 0	0 0	0 0	0 0	0 0	0 0	0 0	0 0	0 0	0 0	0 0	0 0	0 0	0 0	0 0	0 0	0 0	0 0	0 0	0 0	0 0	0 0	0 0	0 0	0 0	0 0	0 0	0 0	6 0	3 0	1 0	0 0	0 0	0 0	0 0	0 0	0 0	2 0	2 0	2 0	0 0
tig00001299	1102215	C	T	0 0	0 0	0 0	0 0	0 0	0 0	0 0	0 0	0 0	0 0	0 0	0 0	0 0	0 0	0 0	0 0	0 0	0 0	0 0	0 0	0 0	0 0	0 0	0 0	0 0	0 0	0 0	0 0	0 0	0 0	0 0	0 0	0 3	6 2	3 2	1 3	0 4	0 0	0 4	0 0	0 5	0 1	2 2	2 0	2 2	0 0
tig00001299	1102228	CA	C	0 0	0 0	0 0	0 0	0 0	0 0	0 0	0 0	0 0	0 0	0 0	0 0	0 0	0 0	0 0	0 0	0 0	0 0	0 0	0 0	0 0	0 0	0 0	0 0	0 0	0 0	0 0	0 0	0 0	0 0	0 0	0 0	3 0	6 0	3 0	1 0	3 0	0 0	3 0	0 0	4 0	0 0	3 0	4 0	4 0	0 0
tig00001299	1102230	AG	A	0 0	0 0	0 0	0 0	0 0	0 0	0 0	0 0	0 0	0 0	0 0	0 0	0 0	0 0	0 0	0 0	0 0	0 0	0 0	0 0	0 0	0 0	0 0	0 0	0 0	0 0	0 0	0 0	0 0	0 0	0 0	0 0	0 0	0 0	0 0	0 0	0 0	0 0	0 0	0 0	0 0	0 0	0 0	0 0	0 0	0 0
tig00001299	1102234	G	A	0 0	0 0	0 0	0 0	0 0	0 0	0 0	0 0	0 0	0 0	0 0	0 0	0 0	0 0	0 0	0 1	0 0	0 0	0 0	0 1	0 0	0 0	0 0	0 2	0 3	0 0	0 1	0 0	0 1	0 2	0 0	0 0	0 3	0 8	0 6	0 6	0 5	0 0	0 4	0 0	0 5	0 1	0 7	0 4	0 5	0 0
tig00001299	1102240	C	T	0 0	0 0	0 0	0 0	0 0	0 1	0 0	0 0	0 0	0 0	0 0	0 0	0 0	0 0	0 0	0 1	0 0	0 0	0 1	0 2	0 0	0 0	0 0	0 3	0 4	0 0	0 2	0 0	0 2	0 2	0 0	0 0	0 3	0 8	0 6	0 6	0 5	0 0	0 5	0 0	0 5	0 1	0 8	0 5	0 5	0 0
tig00001299	1102241	G	A	0 0	0 0	0 0	0 0	0 0	0 1	0 0	0 0	0 0	0 0	0 0	0 0	0 0	0 0	0 0	1 0	0 0	1 0	1 0	2 0	0 0	0 0	0 0	3 0	4 0	0 0	2 0	0 0	2 0	0 2	0 0	0 0	3 0	7 0	7 0	5 0	5 0	0 0	5 0	0 0	5 0	1 0	8 0	4 1	5 0	0 0
tig00001299	1102248	C	T	0 0	0 0	0 0	0 0	0 0	0 4	0 0	0 0	0 1	0 0	0 0	0 0	0 1	0 0	0 0	0 2	0 0	0 4	0 1	0 2	0 0	0 0	0 0	0 5	0 5	0 0	0 2	0 0	0 5	0 4	0 0	0 0	0 4	0 8	0 7	0 7	0 6	0 0	0 6	0 0	0 7	0 1	0 9	0 5	0 5	0 1
tig00001299	1102275	C	T	0 0	0 1	0 0	0 0	0 1	0 6	0 4	0 2	0 1	0 7	0 6	0 0	0 1	0 0	0 0	0 3	0 0	0 6	0 1	0 4	0 4	0 0	0 0	0 6	0 7	0 0	0 2	0 0	0 5	0 18	0 7	0 0	2 2	2 6	0 7	3 5	6 2	0 0	8 0	0 0	10 0	0 1	6 4	1 5	7 2	2 0
tig00001299	1102293	A	G	0 0	0 1	0 0	0 0	0 1	0 6	0 4	0 2	0 1	0 7	0 6	0 0	0 1	0 0	0 0	0 3	0 0	0 6	0 1	0 4	0 5	0 0	0 0	0 6	0 7	0 0	0 2	0 0	0 5	2 17	0 7	0 0	2 2	0 10	0 7	5 3	8 0	0 0	7 0	0 0	10 0	0 1	6 4	3 2	6 2	0 0
tig00001299	1102295	G	T	0 0	0 1	0 0	0 0	0 1	0 6	0 4	0 2	0 1	0 7	0 6	0 0	0 1	0 1	0 0	0 3	0 0	0 6	0 1	0 4	0 5	0 0	0 0	0 6	0 7	0 0	0 2	0 0	0 5	0 19	0 7	0 0	0 4	0 10	0 7	0 8	0 8	0 1	0 8	0 0	0 10	0 1	0 10	0 7	0 10	0 4
tig00001299	1102297	C	T	0 0	0 1	0 0	0 0	0 1	0 6	0 4	0 2	0 1	0 7	0 6	0 0	0 1	0 1	0 0	0 3	0 0	0 6	0 1	0 4	0 5	0 0	0 0	0 6	0 7	0 0	0 2	0 0	0 5	0 19	0 7	0 0	0 4	1 9	3 4	1 7	0 8	0 0	0 8	0 0	0 10	0 1	0 10	2 5	2 8	0 4
tig00001299	1102299	G	A	0 0	0 1	0 0	0 0	0 1	0 6	0 4	0 2	0 1	0 7	0 6	0 0	0 1	0 1	0 0	0 3	0 0	0 6	0 1	0 5	0 5	0 0	0 0	0 6	0 8	0 0	0 2	0 0	0 5	6 13	0 7	0 0	0 4	0 10	0 7	0 8	0 8	0 1	0 8	0 0	0 10	0 1	0 10	0 7	0 10	0 4
tig00001299	1102301	G	A	0 0	1 0	0 0	0 1	0 1	0 6	0 4	0 2	0 1	0 7	0 6	0 0	0 1	0 1	0 0	0 3	0 0	0 6	0 1	0 6	0 5	0 0	0 0	0 6	0 8	0 0	0 2	0 0	0 5	0 19	0 7	0 0	0 4	0 10	0 7	0 8	0 8	0 1	0 8	0 0	0 10	0 1	0 10	0 7	0 10	0 4
tig00001299	1102313	G	A	0 1	0 1	0 2	0 1	0 1	0 6	1 3	0 2	1 0	0 7	0 6	0 0	0 2	0 1	0 0	0 3	0 0	0 6	0 1	0 6	0 5	0 0	0 0	0 6	0 8	0 0	0 2	0 0	0 5	0 19	0 7	0 0	0 4	0 10	0 7	0 8	0 8	0 1	0 8	0 0	0 10	0 1	0 10	0 7	0 10	0 4
tig00001299	1102340	G	A	0 11	0 1	0 7	1 0	0 6	0 10	0 7	0 6	0 1	0 7	0 12	0 0	0 2	0 7	0 0	0 1	0 2	0 5	4 0	2 2	0 5	0 0	0 0	0 2	1 3	0 0	0 0	0 0	0 2	0 11	1 3	0 0	0 3	0 3	0 6	0 7	0 8	0 1	0 7	0 0	0 10	0 1	0 7	2 4	2 6	4 0
tig00001299	1102345	G	T	0 11	0 1	0 8	0 1	0 6	0 6	0 7	0 6	0 0	0 5	0 12	0 0	0 1	0 6	0 0	0 1	0 2	0 0	0 4	0 3	0 5	0 0	0 0	0 2	0 4	0 0	0 0	0 0	0 0	0 8	0 0	0 0	0 2	0 4	0 4	0 6	0 8	0 1	0 7	0 0	0 10	0 1	0 7	0 5	0 8	0 4
tig00001299	1102346	G	A	0 11	1 0	0 7	0 1	1 5	0 5	1 3	0 4	0 0	0 0	0 6	0 0	0 1	0 7	0 0	1 0	0 2	0 0	0 4	0 3	0 0	0 0	0 0	1 1	0 3	0 0	0 0	0 0	0 0	0 7	0 0	0 0	1 1	0 4	0 4	1 5	0 7	1 0	0 7	0 0	0 9	1 0	2 5	2 3	2 6	4 0
tig00001299	1102354	T	C	0 11	0 1	0 8	0 0	0 5	0 5	0 6	0 6	0 0	0 4	0 12	0 0	0 0	0 7	0 0	0 0	0 2	0 0	0 4	0 0	0 4	0 0	0 0	0 0	0 0	0 0	0 0	0 0	0 0	0 0	0 0	0 0	1 0	0 0	2 0	1 1	4 0	0 0	3 0	0 0	4 0	0 0	2 0	2 3	3 2	0 3
tig00001299	1102354	TAAGG	CAAGA	0 11	0 1	0 8	0 0	0 5	0 5	0 6	0 6	0 0	0 4	0 12	0 0	0 0	0 7	0 0	0 0	0 2	0 0	0 4	0 0	0 4	0 0	0 0	0 0	0 0	0 0	0 0	0 0	0 0	0 0	0 0	0 0	0 0	4 0	0 0	0 1	0 0	0 0	0 0	0 0	0 0	0 0	0 0	0 3	0 2	0 3
tig00001299	1102371	G	A	0 0	0 0	0 0	0 1	0 0	0 0	0 0	0 0	0 0	0 0	0 0	0 0	0 0	0 0	0 0	0 0	0 0	0 0	0 0	0 2	0 0	0 0	0 0	0 0	0 1	0 0	0 1	0 0	0 0	0 0	0 0	0 0	0 0	0 0	0 0	0 0	0 0	0 0	0 0	0 0	0 0	0 0	0 0	0 0	0 0	0 0
tig00001299	1102375	T	C	10 0	0 0	7 0	0 1	0 0	5 0	3 0	4 0	0 0	0 0	6 0	0 0	0 0	5 0	0 0	0 0	2 0	0 0	4 0	0 2	0 0	0 0	0 0	0 0	0 1	0 0	0 1	0 0	0 0	0 0	0 0	0 0	1 0	2 0	2 0	3 0	4 0	0 0	4 0	0 0	5 0	0 0	6 0	1 0	3 0	0 0
tig00001299	1102393	A	G	0 10	0 0	0 7	0 0	0 5	0 5	0 3	0 4	0 0	0 0	0 6	0 0	0 0	0 5	0 0	0 0	0 2	0 0	0 4	0 0	0 0	0 0	0 0	0 0	0 0	0 0	0 0	0 0	0 0	0 0	0 0	0 0	0 0	0 0	0 0	1 0	0 0	0 0	0 0	0 0	0 0	0 0	0 0	0 2	0 5	0 3
tig00001299	1102393	A	T	0 10	0 0	0 7	0 0	0 5	0 5	0 3	0 4	0 0	0 0	0 6	0 0	0 0	0 5	0 0	0 0	0 2	0 0	0 4	0 0	0 0	0 0	0 0	0 0	0 0	0 0	0 0	0 0	0 0	0 0	0 0	0 0	0 0	0 0	0 0	0 0	0 0	0 0	0 0	0 0	0 0	0 0	0 0	0 2	0 5	0 3
tig00001299	1102412	C	T	0 10	0 0	0 6	0 0	0 5	0 5	0 3	0 4	0 0	0 0	0 6	0 0	0 0	0 5	0 0	0 0	0 2	0 0	0 4	0 0	0 0	0 0	0 0	0 0	0 0	0 0	0 0	0 0	0 0	0 0	0 0	0 0	0 0	0 2	0 0	0 1	0 0	0 0	0 1	0 0	0 2	0 1	0 0	0 1	0 2	0 2
tig00001299	1102436	T	TA	0 0	0 0	0 0	0 0	0 0	0 0	0 0	0 0	0 0	0 0	0 0	0 0	0 0	0 0	0 0	0 0	0 0	0 0	0 0	0 0	0 0	0 0	0 0	0 0	0 0	0 0	0 0	0 0	0 0	0 0	0 0	0 0	0 0	0 0	0 0	0 0	0 0	0 0	0 0	0 0	0 0	0 0	0 0	0 0	0 0	0 0
tig00001299	1102437	A	AG	0 0	0 0	0 0	0 0	0 0	0 0	0 0	0 0	0 0	0 0	0 0	0 0	0 0	0 0	0 0	0 0	0 0	0 0	0 0	0 0	0 0	0 0	0 0	0 0	0 0	0 0	0 0	0 0	0 0	0 0	0 0	0 0	0 0	0 0	0 0	0 0	0 0	0 0	0 0	0 0	1 0	0 0	0 0	0 0	0 0	0 0
tig00001299	1102462	G	A	0 0	0 0	0 0	0 0	0 0	0 0	0 0	0 0	0 0	0 0	0 0	0 0	0 0	0 0	0 0	0 0	0 0	0 1	0 0	0 0	0 0	0 0	0 0	0 0	0 0	0 0	0 0	0 0	0 0	0 0	0 0	0 0	0 0	0 0	0 0	0 0	0 0	0 0	0 0	0 0	1 0	1 0	0 0	0 0	0 0	0 0
tig00001299	1102469	G	A	0 0	0 0	0 0	0 0	0 0	0 1	0 0	0 0	0 1	0 0	0 1	0 0	0 0	0 1	0 0	0 0	0 0	0 1	0 0	0 0	0 0	0 1	0 0	0 0	0 0	0 0	0 0	0 0	0 2	0 0	0 0	0 0	0 0	0 0	0 0	0 0	0 0	0 0	0 0	0 0	0 1	0 1	0 0	0 0	0 0	0 0
tig00001299	1102475	C	A	0 0	0 0	0 0	0 0	0 0	0 2	0 0	0 0	0 1	0 1	0 1	0 0	0 0	0 1	0 0	0 0	0 0	0 1	0 0	0 0	0 0	0 1	0 0	0 0	0 0	0 1	0 0	0 0	0 2	0 0	0 0	0 0	0 0	0 0	0 0	0 0	0 0	0 0	0 0	0 0	0 1	0 1	0 0	0 0	0 0	0 0
tig00001299	1102476	G	A	0 0	0 0	0 0	0 0	0 1	0 2	0 0	0 0	0 1	0 1	0 1	0 0	0 0	0 1	0 0	0 0	0 0	0 1	0 0	0 0	0 0	0 1	0 0	0 0	0 0	0 1	0 0	0 0	0 2	0 0	0 0	0 0	0 0	0 0	0 0	0 0	0 0	0 0	0 0	0 0	0 1	0 1	0 0	0 0	0 0	0 0
tig00001299	1102486	C	T	0 0	1 0	0 0	0 0	0 1	0 2	0 0	0 0	0 1	0 1	0 1	0 0	0 0	0 1	0 0	0 1	0 0	0 1	0 0	0 0	0 0	0 1	0 1	0 0	0 0	0 1	0 0	0 0	0 2	0 0	0 0	0 0	0 0	0 0	0 0	0 0	0 0	0 0	0 0	0 0	1 0	1 0	0 0	0 0	0 0	0 0
tig00001299	1102504	C	A	0 0	0 0	0 0	0 0	0 0	0 2	0 0	0 0	0 1	0 0	0 1	0 0	0 0	0 0	0 0	0 1	0 0	0 0	0 0	0 0	0 0	0 1	0 1	0 0	0 0	0 0	0 1	0 0	0 0	0 0	0 0	0 0	0 0	0 0	0 0	0 0	0 0	0 1	0 0	0 0	0 1	0 1	0 0	0 0	0 0	0 0
tig00001299	1102508	C	T	0 0	0 0	0 0	0 0	0 0	0 2	0 0	0 0	0 1	0 0	0 1	0 0	0 0	0 0	0 0	0 1	0 0	0 0	0 0	0 0	0 0	0 1	0 1	0 0	0 0	0 0	0 1	0 0	1 0	0 0	0 0	0 0	0 0	0 0	0 0	0 0	0 0	0 1	0 0	0 0	0 1	0 1	0 0	0 0	0 0	0 0
tig00001299	1102523	A	G	0 0	0 1	0 0	0 0	0 1	0 2	0 0	0 0	0 1	0 1	0 1	0 0	0 0	0 1	0 0	0 1	0 0	0 1	0 0	0 0	0 0	0 1	0 1	0 0	0 0	0 1	0 1	0 0	0 2	0 0	0 0	0 0	0 0	0 0	0 0	0 0	0 0	0 1	0 0	0 0	0 1	0 1	0 0	0 0	0 0	0 0
tig00001299	1102547	T	G	0 0	0 0	0 0	0 0	0 0	1 0	0 0	0 0	1 0	0 0	1 0	0 0	0 0	0 0	0 0	0 0	0 0	0 0	0 0	0 0	0 0	1 0	0 0	0 0	0 0	0 0	0 0	0 0	1 0	0 0	0 0	0 0	0 0	0 0	0 0	0 0	0 0	0 1	0 0	0 0	0 0	0 0	0 0	0 0	0 0	0 0
tig00001299	1102551	TC	T	0 0	0 0	0 0	0 0	0 0	0 1	0 0	0 0	0 1	0 0	0 1	0 0	0 0	0 0	0 0	0 0	0 0	0 0	0 0	0 0	0 0	0 1	0 0	0 0	0 0	0 0	0 0	0 0	0 1	0 0	0 0	0 0	0 0	0 0	0 0	0 0	0 0	0 1	0 0	0 0	0 0	0 0	0 0	0 0	0 0	0 0
tig00001299	1102552	C	T	0 0	0 0	0 0	0 0	0 0	0 1	0 0	0 0	0 1	0 0	0 1	0 0	0 0	0 0	0 0	0 0	0 0	0 0	0 0	0 0	0 0	0 1	0 0	0 0	0 0	0 0	0 0	0 0	0 1	0 0	0 0	0 0	0 0	0 0	0 0	0 0	0 0	0 1	0 0	0 0	0 0	0 0	0 0	0 0	0 0	0 0
tig00001299	1102553	C	T	0 0	0 0	0 0	0 0	0 0	0 1	0 0	0 0	0 1	0 0	0 1	0 0	0 0	0 0	0 0	0 0	0 0	0 0	0 0	0 0	0 0	0 1	0 0	0 0	0 0	0 0	0 0	0 0	0 1	0 0	0 0	0 0	0 0	0 0	0 0	0 0	0 0	0 1	0 0	0 0	0 0	0 0	0 0	0 0	0 0	0 0
tig00001299	1102586	TGTACAG	AGTAAAA	0 0	0 0	0 0	0 0	0 0	0 0	0 0	0 0	0 0	0 0	0 0	0 0	0 0	0 0	0 0	0 0	0 0	0 0	0 0	0 0	0 0	0 0	0 0	0 0	0 0	0 0	0 0	0 0	0 0	0 0	0 0	0 0	0 0	0 0	0 0	0 0	0 0	0 0	0 0	0 0	0 0	0 0	0 0	0 0	0 0	0 0
tig00001299	1102592	G	A	0 0	0 0	0 0	0 0	0 0	0 0	0 0	0 0	0 0	0 0	0 0	0 0	0 0	0 0	0 0	0 0	0 0	0 0	0 0	0 0	0 0	0 0	0 0	0 0	0 0	0 0	0 0	0 0	0 0	0 0	0 0	0 0	0 0	0 0	0 0	0 0	0 0	0 0	0 0	0 0	0 0	0 0	0 0	0 0	0 0	0 0
tig00001299	1102611	C	A	0 0	0 0	0 0	0 0	0 0	0 0	0 0	0 0	0 0	0 0	0 0	0 0	0 0	0 0	0 0	0 0	0 0	0 0	0 0	0 0	0 0	0 1	0 0	0 0	0 0	0 0	0 0	0 0	0 0	0 2	0 2	0 0	0 0	0 0	0 0	0 0	0 0	0 0	0 0	0 0	0 0	0 0	0 0	0 0	0 0	0 0
tig00001299	1102614	G	A	0 0	0 0	0 0	0 0	0 0	0 0	0 0	0 0	0 0	0 0	0 0	0 0	0 0	0 0	0 0	0 0	0 0	0 0	0 0	0 0	0 0	0 1	0 0	0 0	0 0	0 0	0 0	0 0	0 0	0 2	0 2	0 0	0 0	0 0	0 0	0 0	0 0	0 0	0 0	0 0	0 0	0 0	0 0	0 0	0 0	0 0
tig00001299	1102617	A	G	0 0	0 0	0 0	0 0	0 0	0 0	0 0	0 0	0 0	0 0	0 0	0 0	0 0	0 0	0 0	0 0	0 0	0 0	0 0	0 0	0 0	0 1	0 0	0 0	0 0	0 0	0 0	0 0	0 0	2 0	1 0	0 0	0 0	0 0	0 0	0 0	0 0	0 0	0 0	0 0	0 0	0 0	0 0	0 0	0 0	0 0
tig00001299	1102627	T	G	0 0	0 0	0 0	0 0	0 0	0 0	0 0	0 0	0 0	0 0	0 0	0 0	0 0	0 0	0 0	0 0	0 0	0 0	0 0	0 0	0 0	0 1	0 0	0 0	0 0	0 0	0 0	0 0	0 0	2 3	2 2	0 0	0 0	0 0	0 0	0 0	0 0	0 0	0 0	0 0	0 0	0 0	0 0	0 0	0 0	0 0
tig00001299	1102640	C	T	0 0	0 0	0 0	0 0	0 0	0 0	0 0	0 0	0 0	0 0	0 0	0 0	0 0	0 0	0 0	0 0	0 0	0 0	0 0	0 0	0 0	0 1	0 0	0 0	0 0	0 0	0 0	0 0	0 0	2 4	0 6	0 0	0 0	0 0	0 0	0 0	0 0	0 0	0 0	0 0	0 0	0 0	0 0	0 0	0 0	0 0
tig00001299	1102657	G	A	0 0	0 0	0 0	0 0	0 0	0 0	0 0	0 0	0 0	0 0	0 0	0 0	0 0	0 0	0 0	0 0	0 0	0 0	0 0	0 0	0 0	0 2	0 0	0 0	0 0	0 0	0 0	0 0	0 0	0 6	0 5	0 0	0 0	0 0	0 0	0 0	0 0	0 0	0 0	0 0	0 0	0 0	0 0	0 0	0 0	0 0
tig00001299	1102662	G	T	0 0	0 0	0 1	0 0	0 0	0 0	0 0	0 0	0 0	0 1	0 0	0 0	0 0	0 0	0 0	0 0	0 0	0 0	0 0	0 0	0 0	0 2	0 0	0 0	0 0	0 0	0 0	0 0	0 0	0 6	0 5	0 0	0 0	0 0	0 0	0 0	0 0	0 0	0 0	0 0	0 0	0 0	0 0	0 0	0 0	0 0
tig00001299	1102663	A	AT	0 0	0 0	0 1	0 0	0 0	0 0	0 0	0 0	0 0	0 1	0 0	0 0	0 0	0 0	0 0	0 0	0 0	0 0	0 0	0 0	0 0	0 2	0 0	0 0	0 0	0 0	0 0	0 0	0 0	2 4	0 6	0 0	0 0	0 0	0 0	0 0	0 0	0 0	0 0	0 0	0 0	0 0	0 0	0 0	0 0	0 0
tig00001299	1102678	GCAC	ACAT	0 0	0 0	0 1	0 0	0 0	0 0	0 0	0 0	0 0	0 1	0 0	0 0	0 0	0 0	0 0	0 0	0 0	0 0	0 0	0 0	0 0	0 1	0 0	0 0	0 0	0 0	0 0	0 0	0 0	0 6	0 5	0 0	0 0	0 0	0 0	0 0	0 0	0 0	0 0	0 0	0 0	0 0	0 0	0 0	0 0	0 0
tig00001299	1102679	C	T	0 0	0 0	0 1	0 0	0 0	0 0	0 0	0 0	0 0	0 1	0 0	0 0	0 0	0 0	0 0	0 0	0 0	0 0	0 0	0 0	0 0	0 1	0 0	0 0	0 0	0 0	0 0	0 0	0 0	0 6	0 5	0 0	0 0	0 0	0 0	0 0	0 0	0 0	0 0	0 0	0 0	0 0	0 0	0 0	0 0	0 0
tig00001299	1102681	C	T	0 0	0 0	0 1	0 0	0 0	0 0	0 0	0 0	0 0	0 1	0 0	0 0	0 0	0 0	0 0	0 0	0 0	0 0	0 0	0 0	0 0	0 1	0 0	0 0	0 0	0 0	0 0	0 0	0 0	0 6	0 5	0 0	0 0	0 0	0 0	0 0	0 0	0 0	0 0	0 0	0 0	0 0	0 0	0 0	0 0	0 0
tig00001299	1102690	G	A	0 0	0 0	0 1	0 0	0 0	0 0	0 0	0 0	0 0	0 1	0 0	0 0	0 0	0 0	0 0	0 0	0 0	0 0	0 0	0 0	0 0	0 1	0 0	0 0	0 0	0 0	0 0	0 0	0 0	0 4	0 3	0 0	0 0	0 0	0 0	0 0	0 0	0 0	0 0	0 0	0 0	0 0	0 0	0 0	0 0	0 0
tig00001299	1102696	G	A	0 0	0 0	0 1	0 0	0 0	0 0	0 0	0 0	0 0	0 1	0 0	0 0	0 0	0 0	0 0	0 0	0 0	0 0	0 0	0 0	0 0	0 0	0 0	0 0	0 0	0 0	0 0	0 0	0 0	0 2	0 1	0 0	0 0	0 0	0 0	0 0	0 0	0 0	0 0	0 0	0 0	0 0	0 0	0 0	0 0	0 0
tig00001299	1102709	ATGG	TGA	0 0	0 0	0 0	0 0	0 0	0 0	0 0	0 0	0 0	0 0	0 0	0 0	0 0	0 0	0 0	0 0	0 0	0 0	0 0	0 0	0 0	0 0	0 0	0 0	0 0	0 0	0 0	0 0	0 0	0 0	0 0	0 0	0 0	0 0	0 0	0 0	0 0	0 0	0 0	0 0	0 0	0 0	0 0	0 0	0 0	0 0
tig00001299	1102712	G	A	0 0	0 0	0 0	0 0	0 0	0 0	0 0	0 0	0 0	0 0	0 0	0 0	0 0	0 0	0 0	0 0	0 0	0 0	0 0	0 0	0 0	0 0	0 0	0 0	0 0	0 0	0 0	0 0	0 0	0 0	0 0	0 0	0 0	0 0	0 0	0 0	0 0	0 0	0 0	0 0	0 0	0 0	0 0	0 0	0 0	0 0
tig00001299	1102721	C	T	0 0	0 0	0 0	0 0	0 0	0 0	0 0	0 0	0 0	0 0	0 0	0 0	0 0	0 0	0 0	0 0	0 0	0 0	0 0	0 0	0 0	0 0	0 0	0 0	0 0	0 0	0 0	0 0	0 0	0 0	0 0	0 0	0 0	0 0	0 0	0 0	0 0	0 0	0 0	0 0	0 0	0 0	0 0	0 0	0 0	0 0
tig00001299	1102732	G	A	0 0	0 0	0 0	0 0	0 0	0 0	0 0	0 0	0 0	0 0	0 0	0 0	0 0	0 0	0 0	0 0	0 0	0 0	0 0	0 0	0 0	0 0	0 0	0 0	0 0	0 0	0 0	0 0	0 0	0 0	0 0	0 0	0 0	0 0	0 0	0 0	0 0	0 0	0 0	0 0	0 0	0 0	0 0	0 0	0 0	0 0
tig00001299	1102736	G	A	0 0	0 0	0 0	0 0	0 0	0 0	0 0	0 0	0 0	0 0	0 0	0 0	0 0	0 0	0 0	0 0	0 0	0 0	0 0	0 0	0 0	0 0	0 0	0 0	0 0	0 0	0 0	0 0	0 0	0 0	0 0	0 0	0 0	0 0	0 0	0 0	0 0	0 0	0 0	0 0	0 0	0 0	0 0	0 0	0 0	0 0
tig00001299	1102741	G	A	0 0	0 0	0 0	0 0	0 0	0 0	0 0	0 0	0 0	0 0	0 0	0 0	0 0	0 0	0 0	0 0	0 0	0 0	0 0	0 0	0 0	0 0	0 0	0 0	0 0	0 0	0 0	0 0	0 0	0 0	0 0	0 0	0 0	0 0	0 0	0 0	0 0	0 0	0 0	0 0	0 0	0 0	0 0	0 0	0 0	0 0
tig00001299	1102752	T	G	0 0	0 0	0 0	0 0	0 0	0 0	0 0	0 0	0 0	0 0	0 0	0 0	0 0	0 0	0 0	0 0	0 0	0 0	0 0	0 0	0 0	0 0	0 0	0 0	0 0	0 0	0 0	0 0	0 0	0 0	0 0	0 0	0 0	0 0	0 0	0 0	0 0	0 0	0 0	0 0	0 0	0 0	0 0	0 0	0 0	0 0
tig00001299	1102760	G	A	0 0	0 0	0 0	0 0	0 0	0 0	0 0	0 0	0 0	0 0	0 0	0 0	0 0	0 0	0 0	0 0	0 0	0 0	0 0	0 0	0 0	0 0	0 0	0 0	0 0	0 0	0 0	0 0	0 0	0 0	0 0	0 0	0 0	0 0	0 0	0 0	0 0	0 0	0 0	0 0	0 0	0 0	0 0	0 0	0 0	0 0
tig00001299	1102777	G	T	0 0	0 0	0 0	0 0	0 0	0 0	0 0	0 0	0 0	0 0	0 0	0 0	0 0	0 0	0 0	0 0	0 0	0 0	0 0	0 0	0 0	0 0	0 0	0 0	0 0	0 0	0 0	0 0	0 0	0 0	0 0	0 0	0 0	0 0	0 0	0 0	0 0	0 0	0 0	0 0	0 0	0 0	0 0	0 0	0 0	0 0
tig00001299	1102790	G	T	0 0	0 0	0 0	0 0	0 0	0 0	0 0	0 0	0 0	0 0	0 0	0 0	0 0	0 0	0 0	0 0	0 0	0 0	0 0	0 0	0 0	0 0	0 0	0 0	0 0	0 0	0 0	0 0	0 0	0 8	0 2	0 0	0 0	0 0	0 0	0 0	0 0	0 0	0 0	0 0	0 0	0 0	0 0	0 0	0 0	0 0
tig00001299	1102805	G	A	0 0	0 0	0 0	0 0	0 0	0 0	0 0	0 0	0 0	0 0	0 0	0 0	0 0	0 0	0 0	0 0	0 0	0 0	0 0	0 0	0 0	0 0	0 0	0 0	0 0	0 0	0 0	0 0	0 0	8 0	1 1	0 0	0 0	0 0	0 0	0 0	0 0	0 0	0 0	0 0	0 0	0 0	0 0	0 0	0 0	0 0
tig00001299	1102811	G	A	0 0	0 0	0 0	0 0	0 0	0 0	0 0	0 0	0 0	0 0	0 0	0 0	0 0	0 0	0 0	0 0	0 0	0 0	0 0	0 0	0 0	0 0	0 0	0 0	0 0	0 0	0 0	0 0	0 0	8 0	1 0	0 0	0 0	0 0	0 0	0 0	0 0	0 0	0 0	0 0	0 0	0 0	0 0	0 0	0 0	0 0
tig00001299	1102811	GAGGTA	AAAGTG	0 0	0 0	0 0	0 0	0 0	0 0	0 0	0 0	0 0	0 0	0 0	0 0	0 0	0 0	0 0	0 0	0 0	0 0	0 0	0 0	0 0	0 0	0 0	0 0	0 0	0 0	0 0	0 0	0 0	0 0	0 0	0 0	0 0	0 0	0 0	0 0	0 0	0 0	0 0	0 0	0 0	0 0	0 0	0 0	0 0	0 0
tig00001299	1102824	A	G	0 0	0 0	0 0	0 0	0 0	0 0	0 0	0 0	0 0	0 0	0 0	0 0	0 0	0 0	0 0	0 0	0 0	0 0	0 0	0 0	0 0	0 0	0 0	0 0	0 0	0 0	0 0	0 0	0 0	8 0	1 0	0 0	0 0	0 0	0 0	0 0	0 0	0 0	0 0	0 0	0 0	0 0	0 0	0 0	0 0	0 0
tig00001299	1102837	C	A	0 0	0 0	0 0	0 0	0 0	0 0	0 0	0 0	0 0	0 0	0 0	0 0	0 0	0 0	0 0	0 0	0 0	0 0	0 0	0 0	0 0	0 0	0 0	0 0	0 0	0 0	0 0	0 0	0 0	8 0	1 1	0 0	0 0	0 0	0 0	0 0	0 0	0 0	0 0	0 0	0 0	0 0	0 0	0 0	0 0	0 0
tig00001299	1102844	T	A	0 0	0 0	0 0	0 0	0 0	0 0	0 0	0 0	0 0	0 0	0 0	0 0	0 0	0 0	0 0	0 0	0 0	0 0	0 0	0 0	0 0	0 0	0 0	0 0	0 0	0 0	0 0	0 0	0 0	0 8	0 2	0 0	0 0	0 0	0 0	0 0	0 0	0 0	0 0	0 0	0 0	0 0	0 0	0 0	0 0	0 0
tig00001299	1102856	GTAG	ATAA	0 0	0 0	0 0	0 0	0 0	0 0	0 0	0 0	0 0	0 0	0 0	0 0	0 0	0 0	0 0	0 0	0 0	0 0	0 0	0 0	0 0	0 0	0 0	0 0	0 0	0 0	0 0	0 0	0 0	4 0	0 1	0 0	0 0	0 0	0 0	0 0	0 0	0 0	0 0	0 0	0 0	0 0	0 0	0 0	0 0	0 0
tig00001299	1102861	C	T	0 0	0 0	0 0	0 0	0 0	0 0	0 0	0 0	0 0	0 0	0 0	0 0	0 0	0 0	0 0	0 0	0 0	0 0	0 0	0 0	0 0	0 0	0 0	0 0	0 0	0 0	0 0	0 0	0 0	0 4	0 1	0 0	0 0	0 0	0 0	0 0	0 0	0 0	0 0	0 0	0 0	0 0	0 0	0 0	0 0	0 0
tig00001299	1102880	C	T	0 0	0 0	0 0	0 0	0 0	0 0	0 0	0 0	0 0	0 0	0 0	0 0	0 0	0 0	0 0	0 0	0 0	0 0	0 0	0 0	0 0	0 0	0 0	0 0	0 0	0 0	0 0	0 0	0 0	0 0	0 0	0 0	0 0	0 0	0 0	0 1	0 0	0 0	0 0	0 1	0 0	0 0	0 0	0 0	0 0	0 0
tig00001299	1102892	G	A	0 0	0 0	0 0	0 0	0 0	0 0	0 0	0 0	0 0	0 0	0 0	0 0	0 0	0 0	0 0	0 0	0 0	0 0	0 0	0 0	0 0	0 0	0 0	0 0	0 0	0 0	0 0	0 0	0 0	0 0	0 0	0 0	0 0	0 0	0 0	0 1	0 0	0 0	0 0	0 1	0 0	0 0	0 0	0 0	0 0	0 0
tig00001299	1102901	G	A	0 0	0 0	0 0	0 0	0 0	0 0	0 0	0 0	0 0	0 0	0 0	0 0	0 0	0 0	0 0	0 0	0 0	0 0	0 0	0 0	0 0	0 0	0 0	0 0	0 0	0 0	0 0	0 0	0 0	0 0	0 0	0 0	0 0	0 0	0 0	0 0	0 0	0 0	0 0	0 1	0 0	0 0	0 0	0 0	0 0	0 0
tig00001299	1102909	G	A	0 0	0 0	0 0	0 0	0 0	0 0	0 0	0 0	1 0	0 0	0 0	0 0	0 0	0 0	0 0	0 0	0 0	0 0	0 0	0 0	0 0	0 0	0 0	0 0	0 0	0 0	0 0	0 0	0 0	0 0	0 0	0 0	0 0	0 0	0 0	0 0	0 0	0 0	0 0	0 1	0 0	0 0	0 0	0 0	0 0	0 0
tig00001299	1102928	CGGA	AAGC	0 0	0 0	0 0	0 0	0 0	0 0	0 0	0 0	0 1	0 1	0 0	0 0	0 0	0 0	0 0	0 0	0 0	0 0	0 0	0 0	0 0	0 0	0 0	0 0	0 0	0 0	0 0	0 0	0 0	0 0	0 0	0 0	0 0	0 0	0 0	0 0	0 0	0 0	0 0	0 0	0 0	0 0	0 0	0 0	0 0	0 0
tig00001299	1102929	GGA	AGC	0 0	0 0	0 0	0 0	0 0	0 0	0 0	0 0	0 1	0 1	0 0	0 0	0 0	0 0	0 0	0 0	0 0	0 0	0 0	0 0	0 0	0 0	0 0	0 0	0 0	0 0	0 0	0 0	0 0	0 0	0 0	0 0	0 0	0 0	0 0	0 0	0 0	0 0	0 0	1 0	0 0	0 0	0 0	0 0	0 0	0 0
tig00001299	1102969	G	A	0 0	0 0	0 0	0 0	0 0	0 0	0 1	0 0	0 0	0 0	0 0	0 0	0 0	0 0	0 0	0 0	0 0	0 0	0 0	0 0	0 0	0 0	0 0	0 0	0 0	0 0	0 0	0 0	0 0	0 0	0 8	0 0	0 0	0 8	0 2	0 0	0 1	0 5	0 1	0 2	0 0	0 2	0 0	0 1	0 0	0 1
tig00001299	1102978	G	A	0 0	0 0	0 0	0 0	0 0	0 0	0 1	0 0	0 0	0 0	0 0	0 0	0 0	0 0	0 0	0 0	0 0	0 0	0 0	0 0	0 0	0 0	0 0	0 0	0 0	0 0	0 0	0 0	0 0	0 0	0 8	0 0	0 0	1 7	0 2	0 0	0 1	0 5	0 1	0 2	0 0	0 2	0 0	0 2	0 0	0 1
tig00001299	1102990	GAG	AAT	0 0	0 0	0 0	0 0	0 0	0 0	0 1	0 0	0 0	0 0	0 0	0 0	0 0	0 0	0 0	0 0	0 0	0 0	0 0	0 0	0 0	0 0	0 0	0 0	0 0	0 0	0 0	0 0	0 0	0 0	0 8	0 0	0 0	6 1	2 0	0 0	0 1	4 1	0 1	1 1	0 0	0 2	0 0	1 1	0 0	1 0
tig00001299	1102997	T	A	0 0	0 0	0 0	0 0	0 0	0 0	0 0	0 0	0 0	0 0	0 0	0 0	0 0	0 0	0 0	0 0	0 0	0 0	0 0	0 0	0 0	0 0	0 0	0 0	0 0	0 0	0 0	0 0	0 0	0 0	0 8	0 0	0 0	7 1	2 0	0 0	0 1	4 1	0 1	2 0	0 0	0 2	0 0	1 1	0 0	1 0
tig00001299	1103004	TAGCCCT	GAGCCA	0 0	0 0	0 0	0 0	0 0	0 0	0 0	0 0	0 0	0 0	0 0	0 0	0 0	0 0	0 0	0 0	0 0	0 0	0 0	0 0	0 0	0 0	0 0	0 0	0 0	0 0	0 0	0 0	0 0	0 0	0 0	0 0	0 0	0 0	0 0	0 0	0 0	3 0	0 0	1 0	0 0	0 0	0 0	1 0	0 0	0 0
tig00001299	1103004	TAGCCCTAGTTC	GAGCCCCAATTT	0 0	0 0	0 0	0 0	0 0	0 0	0 0	0 0	0 0	0 0	0 0	0 0	0 0	0 0	0 0	0 0	0 0	0 0	0 0	0 0	0 0	0 0	0 0	0 0	0 0	0 0	0 0	0 0	0 0	0 0	0 0	0 0	0 0	0 0	0 0	0 0	0 0	0 0	0 0	0 0	0 0	0 0	0 0	0 0	0 0	0 0
tig00001299	1103004	TAGCCCTAGTTCAG	GAGCCCTAGATCAA	0 0	0 0	0 0	0 0	0 0	0 0	0 0	0 0	0 0	0 0	0 0	0 0	0 0	0 0	0 0	0 0	0 0	0 0	0 0	0 0	0 0	0 0	0 0	0 0	0 0	0 0	0 0	0 0	0 0	0 0	8 0	0 0	0 0	0 0	0 0	0 0	0 0	0 0	0 0	0 0	0 0	0 0	0 0	0 0	0 0	0 0
tig00001299	1103022	C	T	0 1	0 0	0 0	0 0	0 0	0 0	0 0	0 1	0 0	0 0	0 1	0 0	0 2	0 3	0 0	0 0	0 0	0 0	0 0	0 0	0 0	0 2	0 0	0 0	0 0	0 0	0 1	0 0	0 0	0 2	0 2	0 0	0 1	0 8	0 2	0 1	0 0	0 6	0 0	0 2	0 0	0 0	0 0	0 2	0 0	0 1
tig00001299	1103024	T	C	0 1	0 0	0 0	0 0	0 0	0 0	0 0	0 1	0 0	0 0	0 1	0 0	0 2	0 3	0 0	0 0	0 0	0 0	0 0	0 0	0 0	0 2	0 0	0 0	0 0	0 0	0 1	0 0	0 0	0 2	7 2	0 0	0 1	0 8	0 2	0 1	2 0	0 6	0 0	0 2	0 0	2 0	0 0	1 2	0 0	0 1
tig00001299	1103025	C	T	0 1	0 0	0 0	0 0	0 0	0 0	0 0	0 1	0 0	0 0	0 1	0 0	0 2	0 3	0 0	0 0	0 0	0 0	0 0	0 0	3 0	0 2	0 0	0 0	0 0	0 0	1 1	0 0	0 0	2 2	2 2	0 0	0 1	0 8	0 2	0 1	0 0	0 6	0 0	0 2	0 0	0 0	0 0	0 2	0 0	0 1
tig00001299	1103030	C	T	0 1	0 0	0 0	0 0	0 0	0 0	0 0	0 1	0 0	0 0	0 1	0 0	0 2	0 3	0 0	0 0	0 0	0 0	0 0	0 0	0 0	0 2	0 0	0 0	0 0	0 0	0 1	0 0	0 0	0 4	0 8	0 0	0 1	0 8	0 2	0 1	0 4	0 8	0 1	0 2	0 0	0 4	0 0	0 3	0 0	0 1
tig00001299	1103033	C	A	0 1	0 0	0 1	0 0	0 0	0 0	0 0	0 1	0 0	0 0	0 3	0 0	0 2	0 6	0 0	0 0	0 0	0 0	0 0	0 0	0 9	0 2	0 0	0 0	0 0	0 0	0 4	0 0	0 0	2 3	0 9	0 0	0 1	0 8	0 2	0 1	0 2	0 6	0 1	0 2	0 0	0 4	0 0	0 3	0 0	0 1
tig00001299	1103034	A	G	0 1	0 0	0 1	0 0	0 0	0 0	0 0	0 1	0 0	0 0	0 3	0 0	0 2	0 6	0 0	0 0	0 0	0 0	0 0	0 0	0 9	0 2	0 0	0 0	0 0	0 0	0 4	0 0	0 0	0 5	6 3	0 0	0 0	7 0	2 0	0 0	0 1	6 1	0 1	1 0	0 1	0 0	0 0	3 0	0 0	0 1
tig00001299	1103034	AG	GA	0 1	0 0	0 1	0 0	0 0	0 0	0 0	0 1	0 0	0 0	0 3	0 0	0 2	0 6	0 0	0 0	0 0	0 0	0 0	0 0	0 9	0 2	0 0	0 0	0 0	0 0	0 4	0 0	0 0	0 5	0 3	0 0	0 0	0 0	0 0	0 0	2 1	0 1	1 1	0 0	0 1	4 0	0 0	0 0	0 0	0 1
tig00001299	1103035	G	A	0 1	0 0	0 1	0 0	0 0	0 0	0 0	0 1	0 0	0 0	0 3	0 0	0 2	0 6	0 0	0 0	0 0	0 0	0 0	0 0	0 9	0 2	0 0	0 0	0 0	0 0	0 4	0 0	0 0	0 5	0 3	0 0	1 0	0 0	0 0	1 0	1 1	0 1	0 1	1 0	0 1	0 0	0 0	0 0	0 0	0 1
tig00001299	1103048	T	TAG	0 1	0 0	0 3	0 0	0 0	0 0	0 0	0 1	0 0	0 2	0 4	0 0	0 2	0 10	0 0	0 0	0 0	0 0	0 0	0 0	0 10	0 2	0 0	0 0	0 0	0 0	0 4	0 0	0 0	0 5	0 7	0 0	1 3	1 8	0 4	0 2	1 2	0 11	0 2	0 2	0 1	4 1	0 1	0 4	0 0	0 4
tig00001299	1103052	G	A	0 1	0 0	0 3	0 0	0 0	0 0	0 0	0 1	0 0	0 2	0 4	0 0	0 3	0 10	0 0	0 0	0 0	0 0	0 0	0 0	0 10	0 2	0 0	0 0	0 0	0 0	0 5	0 0	0 0	2 3	0 8	0 0	0 4	6 4	2 7	0 2	0 4	7 3	0 4	1 2	0 2	0 6	0 3	2 3	0 0	1 3
tig00001299	1103057	T	A	0 1	0 2	0 4	0 0	0 0	0 0	0 0	0 1	0 0	0 4	0 4	0 0	0 3	0 10	0 0	0 0	0 0	0 0	0 0	0 0	0 9	0 2	0 0	0 0	0 0	0 0	0 4	0 0	0 0	0 5	0 7	0 0	0 4	6 4	2 7	0 2	0 4	6 5	0 4	1 2	0 4	0 6	0 5	2 3	0 0	1 3
tig00001299	1103061	A	G	0 1	0 2	0 4	0 0	0 0	0 0	0 0	0 1	0 0	0 5	0 4	0 0	0 3	0 10	0 0	0 0	0 0	0 0	0 0	0 0	0 10	0 2	0 0	0 0	0 0	0 0	0 5	0 0	0 0	0 5	0 7	0 0	0 4	0 8	0 9	1 1	0 4	0 10	1 2	0 2	1 3	0 6	0 4	0 5	0 0	2 2
tig00001299	1103066	C	T	0 1	0 2	0 4	0 0	0 0	0 0	0 0	0 1	0 0	0 5	0 4	0 0	0 2	0 10	0 0	0 0	0 0	0 0	0 0	0 0	0 9	0 2	0 0	0 0	0 0	0 0	0 6	0 0	0 0	2 3	0 7	0 0	0 4	0 8	0 9	0 1	0 4	0 7	1 2	0 2	0 2	0 5	0 2	0 4	0 0	0 1
tig00001299	1103066	CA	TG	0 1	0 2	0 4	0 0	0 0	0 0	0 0	0 1	0 0	0 5	0 4	0 0	0 2	0 10	0 0	0 0	0 0	0 0	0 0	0 0	0 9	0 2	0 0	0 0	0 0	0 0	0 6	0 0	0 0	0 3	0 7	0 0	0 4	0 8	0 9	1 1	0 4	0 7	1 2	0 2	1 2	0 5	0 2	0 4	0 0	2 1
tig00001299	1103073	G	A	0 1	0 2	0 4	0 0	0 0	0 0	0 0	0 1	0 0	0 5	0 4	0 0	0 2	0 8	0 0	0 0	0 0	0 0	0 0	0 0	0 10	0 2	0 0	0 0	0 0	0 0	0 6	0 0	0 0	0 5	0 8	0 0	0 4	0 9	0 9	0 2	0 3	0 13	1 3	0 3	0 6	0 5	0 6	0 6	0 0	0 4
tig00001299	1103074	G	A	0 2	0 2	0 4	0 0	0 1	0 0	0 0	0 1	0 0	0 5	0 4	0 0	0 2	0 8	0 0	0 0	0 0	0 0	0 0	0 0	0 10	0 2	0 0	0 0	0 0	0 0	0 6	0 0	0 0	0 5	0 8	0 0	2 2	2 8	7 2	0 2	1 4	3 10	1 3	1 2	2 4	1 5	4 2	2 4	0 0	0 4
tig00001299	1103080	CAATTCAGATTGCCGC	TATTTTAGACCGCCGT	0 0	0 0	0 0	0 0	0 0	0 0	0 0	0 0	0 0	0 0	0 0	0 0	0 0	0 0	0 0	0 0	0 0	0 0	0 0	0 0	0 0	0 0	0 0	0 0	0 0	0 0	0 0	0 0	0 0	0 0	0 0	0 0	0 0	0 0	0 0	0 0	0 0	0 0	0 0	0 0	0 0	0 0	0 0	0 0	0 0	0 0
tig00001299	1103082	ATTCAGATT	GTTCAGACC	0 0	0 0	0 0	0 0	0 0	0 0	0 0	0 0	0 0	0 0	0 0	0 0	0 0	0 0	0 0	0 0	0 0	0 0	0 0	0 0	0 0	0 0	0 0	0 0	0 0	0 0	0 0	0 0	0 0	0 0	0 0	0 0	2 0	2 0	7 0	0 0	0 0	2 0	1 0	1 0	0 0	1 0	4 0	2 0	0 0	0 0
tig00001299	1103082	ATTCAGATT	TTTCAGACC	0 0	0 0	0 0	0 0	0 0	0 0	0 0	0 0	0 0	0 0	0 0	0 0	0 0	0 0	0 0	0 0	0 0	0 0	0 0	0 0	0 0	0 0	0 0	0 0	0 0	0 0	0 0	0 0	0 0	0 0	0 0	0 0	0 0	0 0	0 0	1 0	0 0	4 0	1 0	0 0	2 0	0 0	0 0	0 0	0 0	2 0
tig00001299	1103084	TCAGATTGCCGC	CCAGACCGCCGT	0 0	0 0	0 0	0 0	0 0	0 0	0 0	0 0	0 0	0 0	0 0	0 0	0 0	0 0	0 0	0 0	0 0	0 0	0 0	0 0	0 0	0 0	0 0	0 0	0 0	0 0	0 0	0 0	0 0	0 0	0 0	0 0	1 0	0 0	0 0	0 0	1 0	0 0	0 0	0 0	0 0	2 0	0 0	0 0	0 0	0 0
tig00001299	1103085	CAGAT	TAGAC	0 0	0 0	0 0	0 0	0 0	0 0	0 0	0 0	0 0	0 0	0 0	0 0	0 0	0 0	0 0	0 0	0 0	0 0	0 0	0 0	0 0	0 0	0 0	0 0	0 0	0 0	0 0	0 0	0 0	0 0	0 0	0 0	0 0	0 0	0 0	0 0	0 0	0 0	0 0	0 0	0 0	0 0	0 0	0 0	0 0	0 0
tig00001299	1103089	T	C	0 0	0 0	0 0	0 0	0 0	0 0	0 0	0 0	0 0	0 0	0 0	0 0	0 0	0 0	0 0	0 0	0 0	0 0	0 0	0 0	0 0	0 0	0 0	0 0	0 0	0 0	0 0	0 0	0 0	0 0	1 0	0 0	0 0	0 0	0 0	0 0	0 0	0 0	0 0	0 0	0 0	0 0	0 0	0 0	0 0	0 0
tig00001299	1103089	TTGCC	CTGCT	0 0	0 0	0 0	0 0	0 0	0 0	0 0	0 0	0 0	0 0	0 0	0 0	0 0	0 0	0 0	0 0	0 0	0 0	0 0	0 0	0 0	0 0	0 0	0 0	0 0	0 0	0 0	0 0	0 0	0 0	0 0	0 0	0 0	0 0	0 0	0 0	0 0	0 0	0 0	0 0	0 0	0 0	0 0	0 0	0 0	0 0
tig00001299	1103099	ACGAC	GCGAG	0 2	0 5	0 4	0 9	0 2	0 1	0 3	0 3	0 2	0 8	0 5	0 0	0 2	0 4	0 1	0 2	0 3	0 2	0 0	0 4	0 4	0 0	0 9	0 2	0 1	0 10	0 5	0 0	0 8	0 2	0 0	0 0	2 7	1 2	7 4	0 11	0 14	2 25	1 10	0 5	0 3	1 12	2 5	1 6	0 4	0 4
tig00001299	1103103	CGAGC	TGAGT	10 2	0 5	7 4	0 9	0 2	4 1	0 3	3 3	8 2	11 8	17 5	1 0	2 2	19 4	0 1	0 2	2 3	1 2	0 0	4 4	1 4	11 0	0 9	0 2	0 1	0 10	3 5	1 0	8 8	0 2	0 0	0 0	0 7	0 2	0 4	0 11	0 14	0 25	0 10	0 5	1 3	0 12	0 5	0 6	0 4	0 4
tig00001299	1103116	C	T	0 27	0 14	0 25	0 18	0 1	0 17	0 17	0 18	0 24	0 23	0 46	0 10	0 12	0 43	0 4	0 6	0 13	0 12	0 1	0 25	2 16	0 15	0 16	0 6	0 9	0 17	0 18	0 3	0 41	0 3	0 10	0 0	10 2	0 3	3 16	2 5	3 11	12 14	0 4	0 3	4 10	6 4	5 7	3 5	7 2	0 2
tig00001299	1103118	A	G	5 27	0 14	3 25	3 18	1 1	2 17	1 17	6 18	2 24	7 23	0 46	0 10	0 12	2 43	0 4	0 6	1 13	0 12	0 1	0 25	5 16	0 15	0 16	0 6	0 9	0 17	1 18	0 3	2 41	0 3	0 10	0 0	0 2	0 3	0 16	0 5	0 11	0 14	1 4	1 3	0 10	0 4	0 7	0 5	0 2	0 2
tig00001299	1103118	AAG	TA	0 27	0 14	0 25	0 18	0 1	0 17	0 17	0 18	0 24	0 23	0 46	0 10	0 12	0 43	0 4	0 6	0 13	0 12	0 1	0 25	0 16	0 15	0 16	0 6	0 9	0 17	0 18	0 3	0 41	0 3	0 10	0 0	1 2	0 3	0 16	4 5	1 11	0 14	8 4	2 3	2 10	2 4	0 7	0 5	0 2	2 2
tig00001299	1103121	G	A	0 27	0 14	0 25	0 18	0 1	0 17	0 17	0 18	0 24	0 23	0 46	0 10	0 12	0 43	0 4	0 6	0 13	0 12	0 1	0 25	0 16	0 15	0 16	0 6	0 9	0 17	0 18	0 3	0 41	0 3	0 10	0 0	0 2	0 3	0 16	0 5	0 11	0 14	0 4	0 3	0 10	0 4	0 7	0 5	0 2	0 2
tig00001299	1103127	G	A	0 55	0 20	0 40	0 27	0 8	0 29	0 27	0 33	0 44	0 55	0 68	0 18	0 16	0 62	0 6	0 12	0 25	0 16	0 6	0 34	0 35	0 22	0 22	0 9	0 16	0 26	0 26	0 4	0 67	0 5	0 13	0 1	0 18	0 4	0 21	0 15	0 21	0 37	0 14	0 9	0 19	0 17	0 23	0 17	0 13	0 7
tig00001299	1103131	G	A	0 57	0 20	0 41	0 29	0 8	0 31	0 28	0 36	0 45	0 58	0 69	0 17	0 18	0 62	0 7	0 10	0 26	0 16	0 7	0 27	0 36	0 26	0 24	0 10	0 17	0 27	0 27	0 5	0 72	1 4	0 13	0 1	3 16	0 4	0 22	7 11	4 15	0 40	9 5	3 6	2 18	2 15	0 25	0 19	0 13	2 5
tig00001299	1103132	T	A	39 20	1 14	13 23	0 26	0 5	11 17	4 18	4 24	31 11	22 36	31 23	6 9	9 5	42 13	0 3	0 12	8 16	3 13	0 6	16 20	5 30	19 8	2 23	0 10	0 18	0 26	6 22	3 2	16 44	0 5	0 14	0 0	0 18	0 4	1 22	2 16	1 20	5 35	0 14	0 9	9 10	0 17	0 25	3 14	3 11	1 4
tig00001299	1103139	C	T	0 15	0 1	0 20	0 20	1 2	1 6	4 4	1 15	0 12	0 29	1 14	0 11	0 2	2 8	0 2	0 10	0 15	1 7	0 6	0 13	0 14	0 8	0 19	2 8	1 16	5 18	0 20	0 1	0 36	0 4	0 9	0 0	12 4	0 4	11 12	7 10	6 13	21 19	0 13	0 7	4 6	7 7	8 18	8 10	12 2	1 4
tig00001299	1103140	G	A	42 15	1 1	14 20	0 20	0 2	10 6	5 4	5 15	34 12	21 29	33 14	5 11	9 2	47 8	0 2	0 10	8 15	4 7	0 6	16 13	6 14	20 8	2 19	0 8	0 16	0 18	6 20	3 1	17 36	0 4	0 9	0 0	0 4	0 4	0 12	0 10	0 13	0 19	1 13	1 7	10 6	0 7	0 18	0 10	0 2	0 4
tig00001299	1103150	T	C	12 62	5 5	17 32	13 2	2 3	10 17	7 14	13 9	12 49	18 42	7 59	6 12	0 14	10 69	1 2	0 8	4 20	3 10	0 4	3 35	14 13	5 31	1 24	0 8	1 17	3 23	3 24	0 3	13 39	0 4	5 5	0 0	0 2	3 0	0 2	5 8	17 4	6 20	2 11	4 3	5 11	6 0	15 4	8 4	0 4	1 7
tig00001299	1103152	G	A	0 62	0 5	0 32	0 2	0 3	0 17	0 14	0 9	0 49	0 42	0 59	0 12	0 14	0 69	0 2	0 8	0 20	0 10	0 4	0 35	0 13	0 31	0 24	0 8	0 17	0 23	0 24	0 3	0 39	0 4	0 5	0 0	12 2	0 0	10 2	4 8	3 4	17 20	0 11	0 3	4 11	7 0	8 4	4 4	8 4	0 7
tig00001299	1103157	G	A	0 85	0 27	0 64	0 39	0 17	0 45	0 44	0 50	0 73	0 82	0 109	0 30	0 23	0 95	0 12	0 16	0 32	0 19	0 7	0 49	0 42	0 48	0 30	0 12	0 23	0 33	0 35	0 5	0 100	0 6	0 18	0 1	2 19	0 6	5 24	0 19	3 21	9 35	0 17	0 9	4 19	4 14	2 32	6 17	9 6	0 9
tig00001299	1103160	C	T	1 87	0 28	0 68	0 40	0 17	0 47	0 47	0 51	0 74	3 81	0 113	0 31	0 24	0 96	0 12	0 16	0 32	0 20	0 7	2 47	0 42	0 48	0 27	0 12	0 23	0 33	1 35	0 5	0 100	1 5	0 18	0 1	2 19	0 7	0 29	7 11	4 21	7 37	8 9	3 6	4 20	0 18	0 34	0 25	2 13	2 7
tig00001299	1103161	G	A	0 85	0 27	0 65	0 37	0 15	0 45	0 39	0 52	1 66	0 76	0 107	0 27	0 23	0 89	0 12	0 11	0 31	0 19	0 2	0 46	0 39	0 47	0 25	0 9	0 19	0 25	0 37	0 4	0 101	0 1	0 10	0 1	0 7	0 7	1 17	2 13	3 17	9 6	0 13	0 8	0 20	2 5	4 11	4 10	4 0	2 4
tig00001299	1103161	GCCCC	ACCCA	0 85	0 27	0 65	0 37	0 15	0 45	0 39	0 52	0 66	0 76	0 107	0 27	0 23	0 89	0 12	0 11	0 31	0 19	0 2	0 46	0 39	0 47	0 25	0 9	0 19	0 25	0 37	0 4	0 101	0 1	0 10	0 1	0 7	0 7	0 17	0 13	0 17	0 6	0 13	0 8	0 20	0 5	0 11	0 10	0 0	0 4
tig00001299	1103167	G	A	0 85	0 27	0 65	0 37	0 15	0 45	3 39	0 52	0 66	0 76	0 107	0 27	0 23	0 89	0 12	0 11	0 31	0 19	0 2	0 46	0 39	0 47	0 25	2 9	1 19	5 25	0 37	0 4	0 101	0 1	0 10	0 1	11 7	0 7	5 17	4 13	2 17	26 6	0 13	0 8	4 20	6 5	19 11	9 10	9 0	0 4
tig00001299	1103171	C	T	0 85	0 27	0 65	0 37	0 15	0 45	0 39	0 52	0 66	0 76	1 107	0 27	0 23	0 89	0 12	0 11	0 31	0 19	0 2	0 46	0 39	0 47	0 25	0 9	0 19	0 25	0 37	0 4	0 101	2 1	1 10	0 1	0 7	0 7	0 17	0 13	0 17	0 6	0 13	0 8	0 20	0 5	0 11	0 10	0 0	0 4
tig00001299	1103175	G	T	41 38	1 29	14 57	0 53	0 21	10 42	5 44	5 56	24 44	22 55	32 82	6 22	9 15	39 42	0 16	1 16	8 51	4 44	0 5	16 53	6 32	16 32	2 34	0 21	0 23	0 41	6 33	3 6	17 116	0 1	0 13	0 1	0 18	0 7	0 30	0 10	0 16	0 37	0 5	0 5	0 21	0 17	0 32	0 21	0 11	0 2
tig00001299	1103177	A	G	0 38	1 29	0 57	0 53	1 21	1 42	0 44	1 56	1 44	2 55	4 82	2 22	0 15	0 42	0 16	2 16	0 51	0 44	2 5	2 53	3 32	0 32	2 34	0 21	3 23	1 41	7 33	0 6	0 116	9 1	4 13	0 1	1 18	0 7	0 30	7 10	5 16	1 37	8 5	2 5	2 21	1 17	0 32	0 21	0 11	1 2
tig00001299	1103179	T	A	0 101	0 34	0 78	0 53	0 22	0 59	0 52	0 69	0 81	0 95	0 137	0 31	0 29	0 98	0 16	5 13	8 52	0 48	0 8	10 63	0 44	0 61	14 26	0 23	5 21	11 31	1 46	0 9	0 148	0 11	0 17	0 1	0 20	0 7	1 32	1 18	4 20	0 46	1 15	2 6	0 22	2 16	0 36	0 25	0 14	0 8
tig00001299	1103180	G	A	0 100	0 34	0 77	1 49	0 22	0 59	0 52	0 69	0 79	0 96	0 134	0 31	0 29	0 97	0 16	0 15	0 61	0 47	0 8	0 62	0 44	0 62	0 39	0 23	0 24	0 42	0 49	0 9	0 147	0 10	0 14	0 1	12 9	0 7	10 22	4 13	3 21	18 19	0 16	0 8	4 19	8 7	10 27	5 19	9 6	0 8
tig00001299	1103184	A	G	0 100	0 34	0 76	0 51	0 22	0 59	0 52	0 70	1 81	2 94	4 130	0 31	0 29	0 95	0 16	0 15	1 59	0 48	0 6	0 71	0 44	0 62	0 37	0 23	0 25	0 40	1 49	0 9	0 147	2 9	1 14	0 1	0 21	0 7	0 33	6 11	0 24	0 49	7 9	2 6	2 21	1 17	0 37	0 24	0 15	1 7
tig00001299	1103198	AT	A	28 31	1 22	13 43	0 33	0 20	5 32	4 28	2 45	20 31	9 52	18 79	4 19	4 12	25 29	0 11	0 7	6 36	2 33	0 5	10 39	5 18	10 27	2 16	0 14	0 10	0 15	2 24	2 6	7 97	0 0	0 8	0 1	0 14	0 2	0 18	0 4	0 8	0 21	0 1	0 0	7 6	0 11	0 25	0 12	0 9	0 0
tig00001299	1103199	T	G	0 31	0 22	0 43	1 33	0 20	0 32	0 28	0 45	0 31	0 52	0 79	0 19	0 12	0 29	0 11	3 7	4 36	1 33	0 5	4 39	0 18	0 27	9 16	1 14	4 10	8 15	0 24	0 6	0 97	0 0	0 8	0 1	0 14	3 2	0 18	5 4	15 8	22 21	2 1	4 0	5 6	4 11	6 25	4 12	4 9	1 0
tig00001299	1103207	G	A	0 78	0 23	0 61	0 34	0 18	0 41	0 33	0 49	0 57	0 67	0 102	0 25	0 21	0 63	0 11	0 9	0 45	0 39	0 6	0 56	0 23	0 46	0 29	2 14	1 14	0 20	0 28	0 7	0 106	8 0	1 9	0 1	0 19	0 5	0 26	0 17	0 25	0 41	0 14	0 7	0 20	0 15	0 32	0 22	0 15	0 4
tig00001299	1103208	C	T	0 78	0 23	0 61	0 32	0 18	0 40	0 33	0 48	0 59	0 67	4 96	0 24	0 20	0 60	0 11	0 9	0 44	0 40	0 6	0 55	0 19	0 45	0 29	0 16	0 15	0 21	0 28	0 7	0 106	0 8	0 10	0 1	2 17	0 5	3 23	2 14	4 21	10 32	0 14	0 7	0 20	0 16	4 28	3 17	3 10	3 1
tig00001299	1103213	G	A	0 65	0 23	0 58	0 29	0 18	0 38	0 32	0 47	0 52	0 59	0 97	0 24	0 19	0 57	0 11	0 9	0 44	0 41	1 8	0 51	0 20	0 43	0 26	0 14	0 15	0 20	1 27	0 6	0 99	0 8	0 9	0 1	2 17	2 3	7 19	5 12	0 23	2 42	8 6	2 5	2 18	0 15	2 29	1 20	2 12	0 4
tig00001299	1103216	G	A	1 60	0 21	1 55	0 29	0 18	0 35	0 30	0 45	0 49	0 53	0 90	0 21	0 18	0 54	0 11	0 7	0 43	0 40	0 8	1 47	0 18	0 42	0 25	0 14	0 14	0 17	0 26	0 6	0 95	0 8	0 11	0 1	0 19	3 2	1 24	0 16	3 20	3 36	2 11	1 6	1 19	2 11	12 19	7 12	2 12	0 4
tig00001299	1103220	C	T	0 57	0 21	0 51	0 27	0 18	0 33	0 30	0 42	0 46	0 50	0 83	0 17	0 16	0 48	0 11	0 7	0 43	0 38	0 8	0 44	0 18	0 39	0 22	0 14	0 14	0 17	0 24	0 6	0 91	0 8	0 16	0 1	0 19	0 5	0 25	0 15	0 24	0 39	0 13	0 7	0 18	1 12	0 31	0 18	0 14	0 4
tig00001299	1103227	G	A	0 47	0 19	0 45	0 25	0 16	0 31	0 24	0 36	0 37	0 42	0 75	0 14	0 11	0 41	0 9	0 6	0 35	0 36	0 8	0 40	0 14	0 38	0 21	0 13	0 11	0 15	0 23	0 6	0 81	0 8	0 15	0 1	2 17	1 4	7 17	0 14	0 21	2 38	1 12	0 7	0 16	0 11	2 29	1 18	0 14	0 4
tig00001299	1103233	G	A	0 40	0 18	0 35	0 22	0 16	0 25	0 23	0 32	0 31	0 37	6 60	0 12	0 10	0 37	0 8	0 6	0 32	0 34	0 11	0 32	0 10	0 32	0 18	0 12	0 10	0 14	0 17	0 5	4 65	0 8	0 16	0 1	10 6	0 5	10 14	3 11	5 13	12 18	0 12	1 6	3 14	7 5	10 21	2 14	9 4	0 4
tig00001299	1103234	G	A	16 21	3 15	18 17	10 12	0 16	9 17	4 19	3 28	11 20	8 29	19 47	5 7	3 6	15 22	4 4	4 2	30 3	25 9	7 5	21 11	7 3	12 18	16 2	7 5	6 2	9 5	9 9	5 0	33 36	0 8	1 15	1 0	2 14	2 3	7 17	1 11	1 16	1 29	1 12	0 7	1 15	0 12	2 28	3 13	0 13	0 4
tig00001299	1103243	G	A	0 23	0 13	0 27	0 20	0 12	0 21	0 16	0 28	0 17	0 24	0 45	0 7	0 6	0 20	0 7	0 4	0 31	0 33	0 12	0 27	0 6	0 21	0 14	0 11	0 5	0 10	0 15	0 5	0 49	0 8	0 12	0 1	0 7	2 2	0 13	0 6	2 12	1 13	1 6	1 3	0 13	2 2	0 18	1 12	1 3	0 4
tig00001299	1103243	GCAG	ACAA	0 23	0 13	0 27	0 20	0 12	0 21	0 16	0 28	0 17	0 24	0 45	0 7	0 6	0 20	0 7	0 4	0 31	0 33	0 12	0 27	0 6	0 21	0 14	0 11	0 5	0 10	0 15	0 5	0 49	0 8	0 12	0 1	0 7	0 2	0 13	0 6	0 12	0 13	0 6	0 3	0 13	0 2	0 18	0 12	0 3	0 4
tig00001299	1103243	GCAG	ACAT	0 23	0 13	0 27	0 20	0 12	0 21	0 16	0 28	0 17	0 24	0 45	0 7	0 6	0 20	0 7	0 4	0 31	0 33	0 12	0 27	0 6	0 21	0 14	0 11	0 5	0 10	0 15	0 5	0 49	0 8	0 12	0 1	6 7	0 2	10 13	2 6	0 12	9 13	0 6	0 3	3 13	1 2	9 18	2 12	7 3	0 4
tig00001299	1103257	C	T	0 15	0 9	0 20	0 13	0 7	0 15	0 10	0 19	0 18	0 16	0 35	0 5	0 5	0 8	0 4	0 3	0 28	0 29	0 16	0 25	0 4	0 13	0 16	0 9	0 4	0 9	0 11	0 5	0 44	0 4	0 11	0 0	2 10	0 4	2 16	2 6	6 5	8 14	0 5	1 3	0 11	0 4	13 11	6 8	1 2	3 0
tig00001299	1103266	TGC	GG	0 0	0 0	0 4	0 0	0 0	0 0	0 1	0 0	0 9	0 0	0 3	0 0	0 0	0 0	0 0	0 0	0 3	0 7	0 13	0 5	0 0	0 0	0 0	0 0	0 0	0 0	0 2	0 1	0 0	0 0	0 11	0 0	0 4	0 2	3 9	0 2	0 9	1 10	0 1	0 4	0 4	0 4	2 8	1 4	1 1	0 2
tig00001299	1103267	G	GC	0 0	0 0	0 4	0 0	0 0	0 0	0 1	0 0	0 9	0 0	0 3	0 0	0 0	0 0	0 0	0 0	0 3	0 7	0 13	0 5	0 0	0 0	0 0	0 0	0 0	0 0	0 2	0 1	0 0	0 0	0 11	0 0	0 4	0 2	0 9	0 2	0 9	0 10	0 1	0 4	0 4	0 4	0 8	0 4	0 1	0 2
tig00001299	1103276	T	C	0 0	0 0	0 4	0 0	0 0	0 0	0 2	0 0	0 9	0 0	0 3	0 0	0 0	0 0	0 0	0 0	0 3	0 7	0 13	0 5	0 0	0 0	0 0	0 0	0 0	0 0	0 2	0 1	0 0	0 0	0 11	0 0	2 2	3 0	9 2	2 1	0 8	7 7	6 0	2 1	5 0	1 4	10 4	7 1	1 1	0 2
tig00001299	1103294	A	G	0 0	0 0	0 0	0 0	0 0	0 0	0 1	0 0	1 7	0 0	0 0	0 0	0 0	0 0	0 0	0 0	0 3	0 6	0 13	0 0	0 0	0 0	0 0	0 0	0 0	0 0	0 0	0 0	0 0	0 0	0 11	0 0	1 0	1 0	8 0	1 0	4 0	5 0	3 0	3 0	2 0	1 4	7 0	1 0	0 0	0 0
tig00001299	1103343	T	C	0 0	0 0	2 0	0 0	0 0	0 0	0 1	1 0	0 1	0 1	1 0	0 0	0 0	0 0	0 0	0 0	0 1	0 0	0 1	0 0	1 0	0 0	1 0	0 0	1 0	0 0	0 0	0 0	0 0	4 0	3 0	0 0	0 0	1 0	0 0	1 0	0 0	0 1	0 0	0 0	0 0	2 0	2 0	0 0	0 0	0 0
tig00001299	1103343	TGC	CGT	0 0	0 0	0 0	0 0	0 0	0 0	0 1	0 0	0 1	0 1	0 0	0 0	0 0	0 0	0 0	0 0	0 1	0 0	0 1	0 0	0 0	0 0	0 0	0 0	0 0	0 0	0 0	0 0	0 0	0 0	5 0	0 0	0 0	0 0	0 0	0 0	0 0	0 1	0 0	0 0	0 0	1 0	0 0	0 0	0 0	0 0
tig00001299	1103356	A	T	0 2	0 1	0 8	0 1	0 8	0 6	0 2	0 10	0 3	0 1	0 7	0 1	0 4	0 4	0 0	0 0	0 1	0 0	0 4	0 2	0 8	0 0	0 3	0 2	0 2	0 2	0 1	0 2	0 0	0 8	8 6	0 0	0 0	0 1	0 0	0 1	0 1	0 1	0 3	0 3	0 3	0 3	0 2	0 0	0 2	0 0
tig00001299	1103362	T	C	0 2	0 1	0 8	0 1	0 8	0 6	0 2	0 10	0 3	0 0	0 7	0 1	0 4	0 3	0 0	0 0	0 1	0 0	0 3	0 2	0 8	0 0	0 3	0 2	0 3	0 2	0 1	0 2	0 0	4 1	5 9	0 0	0 0	1 0	0 0	0 1	0 0	1 0	0 3	0 2	1 0	1 0	0 2	0 0	0 0	0 0
tig00001299	1103374	G	A	0 2	0 1	0 9	0 1	0 8	0 6	0 2	0 10	0 4	0 0	0 7	0 1	0 4	0 4	0 0	0 0	0 1	0 0	0 4	0 2	0 8	0 0	0 3	0 2	0 3	0 2	0 1	0 2	0 0	0 7	0 15	0 0	0 0	0 1	0 0	0 1	0 0	0 1	0 3	0 3	0 3	0 3	0 2	0 1	0 2	0 0
tig00001299	1103383	G	T	0 2	0 1	0 6	0 1	0 8	0 6	0 2	0 10	0 4	0 0	0 7	0 1	0 4	0 4	0 0	0 0	0 1	0 0	0 3	0 2	0 8	0 0	0 3	0 2	0 3	0 2	0 1	0 2	0 0	0 6	8 7	0 0	0 0	0 0	0 0	0 0	0 0	0 1	0 2	0 1	0 3	0 3	0 0	0 1	0 2	0 0
tig00001299	1103398	C	A	0 2	0 1	0 9	0 1	0 8	0 6	0 2	0 10	0 4	0 0	0 7	0 1	0 4	0 4	0 0	0 0	0 1	0 0	0 4	0 2	0 8	0 0	0 2	0 1	0 3	0 2	0 1	0 2	0 0	0 2	8 2	0 0	0 0	0 1	0 0	0 1	0 0	0 1	0 2	0 2	0 3	0 3	0 0	0 1	0 2	0 0
tig00001299	1103421	G	A	0 0	0 0	0 4	0 0	0 4	1 0	0 0	0 8	0 0	0 0	0 5	1 0	0 0	0 0	0 0	0 0	0 1	0 0	0 0	0 0	0 2	0 0	0 0	0 0	0 0	0 2	0 0	0 0	0 0	0 0	0 6	0 0	0 0	0 1	0 0	0 0	0 0	0 1	0 0	0 0	1 2	0 1	0 0	0 1	2 0	0 0
tig00001299	1103425	A	G	0 0	0 0	0 0	0 0	0 0	0 0	0 0	0 0	0 0	0 0	0 0	0 0	0 0	0 0	0 0	0 0	0 0	0 0	0 0	0 0	0 0	0 0	0 0	0 0	0 0	0 2	0 0	0 0	0 0	0 0	1 1	0 0	0 0	1 0	0 0	0 0	0 0	1 0	0 0	0 0	1 0	1 0	0 0	1 0	0 0	0 0
tig00001299	1103458	A	T	0 0	0 0	0 1	0 0	0 0	0 0	0 0	0 0	0 0	0 0	0 0	0 0	0 0	0 0	0 0	0 0	0 0	0 0	0 0	0 0	0 0	0 0	0 0	0 0	0 0	0 0	0 0	0 0	0 0	0 0	0 0	0 0	0 0	0 0	0 0	0 0	0 0	0 1	0 0	0 0	0 1	0 1	0 0	0 0	0 2	0 0
tig00001299	1103475	CG	TGC	0 0	0 0	0 0	0 0	0 0	0 0	0 0	0 0	0 0	0 0	0 0	0 0	0 0	0 0	0 0	0 0	0 0	0 0	0 0	0 0	0 0	0 0	0 0	0 0	0 0	0 0	0 0	0 0	0 0	0 0	0 0	0 0	0 0	0 0	0 0	0 0	0 0	0 0	0 0	0 0	0 0	0 0	0 0	0 0	0 0	0 0
tig00001299	1103503	C	CT	0 0	0 0	0 0	0 0	0 0	0 0	0 0	0 0	0 0	0 0	0 0	0 0	0 0	0 0	0 0	0 0	0 0	0 0	0 0	0 0	0 0	0 0	0 0	0 0	0 0	0 0	0 0	0 0	0 0	0 0	0 0	0 0	0 0	0 0	0 0	0 0	0 0	0 0	0 0	0 0	0 0	0 0	0 0	0 0	0 0	0 0
tig00001299	1103546	G	A	0 0	0 0	0 0	0 0	0 0	0 0	0 0	0 0	0 0	0 0	0 0	0 0	0 0	0 0	0 0	0 0	0 0	0 0	0 0	0 0	0 0	0 0	0 0	0 0	0 0	0 0	0 0	0 0	0 0	0 2	0 0	0 0	0 0	0 0	0 0	0 0	0 0	0 0	0 0	0 0	0 0	0 0	0 0	0 0	0 0	0 0
tig00001299	1103554	C	T	0 0	0 0	0 0	0 0	0 0	0 0	0 0	0 0	0 0	0 0	0 0	0 0	0 0	0 0	0 0	0 0	0 0	0 0	0 0	0 0	0 0	0 0	0 0	0 0	0 0	0 0	0 0	0 0	0 0	0 2	0 0	0 0	0 0	0 0	0 0	0 0	0 0	0 0	0 0	0 0	0 0	0 0	0 0	0 0	0 0	0 0
tig00001299	1103576	G	A	0 0	0 0	0 1	0 0	0 0	0 0	0 0	0 0	0 0	0 0	0 0	0 0	0 0	0 0	0 0	0 0	0 0	0 0	0 0	0 0	0 0	0 1	0 0	0 0	0 0	0 0	0 0	0 0	0 2	0 2	0 0	0 0	0 0	0 0	0 0	0 0	0 0	0 0	0 0	0 0	0 0	0 0	0 0	0 0	0 0	0 0
tig00001299	1103592	G	A	0 0	0 0	0 1	0 0	0 0	0 0	0 0	0 0	0 0	0 0	0 1	0 0	0 0	0 0	0 0	0 0	0 0	0 0	0 0	0 0	0 0	0 0	0 0	0 0	0 0	0 0	0 0	0 0	0 0	0 0	0 0	0 0	0 0	0 0	0 0	0 0	0 0	0 0	0 0	0 0	0 0	0 0	0 0	0 0	0 0	0 0
tig00001299	1103609	T	G	0 0	0 0	1 0	0 0	0 0	0 0	0 0	0 0	0 0	0 0	0 0	0 0	0 0	0 0	0 0	0 0	0 0	0 0	0 0	0 0	0 0	0 0	0 0	0 0	0 0	0 0	0 0	0 0	1 0	0 0	0 0	0 0	0 0	0 0	0 0	0 0	0 0	0 0	0 0	0 0	0 0	0 0	0 0	0 0	0 0	0 0
tig00001299	1103640	G	A	0 0	0 0	0 0	0 0	0 0	0 0	0 0	0 0	0 0	0 0	0 0	0 0	0 0	0 0	0 0	0 0	0 0	0 0	0 0	0 0	0 0	0 0	0 0	0 0	0 0	0 0	0 0	0 0	0 0	0 0	0 0	0 0	0 0	0 0	0 0	0 0	0 0	0 0	0 0	0 0	0 0	0 0	0 0	0 0	0 0	0 0
tig00001299	1103649	TC	CT	0 0	0 0	0 0	0 0	0 0	0 0	0 0	0 0	0 0	0 0	0 0	0 0	0 0	0 0	0 0	0 0	0 0	0 0	0 0	0 0	0 0	0 0	0 0	0 0	0 0	0 0	0 0	0 0	0 0	0 0	0 0	0 0	0 0	0 0	0 0	0 0	0 0	0 0	0 0	0 0	0 0	0 0	0 0	0 0	0 0	0 0
tig00001299	1103657	T	C	0 0	0 0	0 0	0 0	0 0	0 0	0 0	0 0	0 0	0 0	0 0	0 0	0 0	0 0	0 0	0 0	0 0	0 0	0 0	0 0	0 0	0 0	0 0	0 0	0 0	0 0	0 0	0 0	0 0	0 0	0 0	0 0	0 0	0 0	0 0	0 0	0 0	0 0	0 0	0 0	0 0	0 0	0 0	0 0	0 0	0 0
tig00001299	1103681	AG	A	0 0	0 7	0 0	0 2	0 0	0 5	0 0	0 0	0 0	0 0	0 0	0 0	0 0	0 0	0 0	0 0	0 0	0 0	0 0	0 0	0 3	0 0	0 0	0 0	0 0	0 0	0 0	0 0	0 0	0 0	0 0	0 0	0 0	0 0	0 0	0 0	0 0	0 1	0 0	0 0	0 0	0 0	0 0	0 0	0 0	0 0
tig00001299	1103763	G	A	0 0	0 6	0 0	0 2	0 0	0 5	0 0	0 0	0 0	0 0	0 0	0 0	0 0	0 0	0 0	0 0	0 0	0 0	0 0	0 1	0 3	0 0	0 0	0 0	0 0	0 0	0 0	0 0	0 0	0 8	0 6	0 0	0 0	0 0	0 0	0 0	0 0	0 1	0 0	0 0	0 0	0 0	0 0	0 0	0 0	0 0
tig00001299	1103765	G	A	0 0	0 4	0 0	0 1	0 0	0 5	0 0	0 0	0 0	0 0	0 0	0 0	0 0	0 0	0 0	0 0	0 0	0 0	0 0	0 1	0 2	0 0	0 0	0 0	0 0	0 0	0 0	0 0	0 0	0 8	0 6	0 0	0 0	0 0	0 0	0 0	0 0	0 1	0 0	0 0	0 0	0 0	0 0	0 0	0 0	0 0
tig00001299	1103777	T	C	0 0	0 0	0 0	0 0	0 0	0 0	0 0	0 0	0 0	0 0	0 0	0 0	0 0	0 0	0 0	0 0	0 0	0 0	0 0	0 1	0 0	0 0	0 0	0 0	0 0	0 0	0 0	0 0	0 0	3 0	5 0	0 0	0 0	0 0	0 0	0 0	0 0	0 0	0 0	0 0	0 0	0 0	0 0	0 0	0 0	0 0
tig00001299	1103787	T	C	0 0	0 0	0 0	0 0	0 0	0 0	0 0	0 0	0 0	0 0	0 0	0 0	0 0	0 0	0 0	0 0	0 0	0 0	0 0	0 0	0 0	0 0	0 0	0 0	0 0	0 0	0 0	0 0	0 0	0 0	1 0	0 0	0 0	0 0	0 0	0 0	0 0	0 0	0 0	0 0	0 0	0 0	1 0	0 0	0 0	0 0
tig00001299	1103847	G	T	0 10	0 21	0 30	0 3	0 20	0 12	0 23	0 35	0 15	0 23	0 24	0 11	0 15	0 17	0 0	0 1	0 18	0 0	0 0	0 4	0 32	0 31	0 0	0 0	0 5	0 8	0 9	0 3	0 27	0 0	0 0	0 0	0 0	0 0	0 1	0 1	0 0	0 0	0 0	0 0	0 0	0 0	0 1	0 0	0 0	0 1
tig00001299	1103866	G	A	0 14	0 25	0 32	0 4	0 22	0 13	0 28	0 36	0 19	0 29	0 28	0 13	0 16	0 22	0 0	0 1	0 21	0 1	0 0	0 4	0 36	0 36	0 0	0 0	0 5	0 12	0 13	0 3	0 32	0 0	0 0	0 0	0 0	0 0	0 0	0 1	0 1	0 0	0 0	0 0	0 0	0 0	0 0	0 0	0 0	0 0
tig00001299	1103867	G	A	0 14	0 25	0 32	0 4	0 22	0 13	0 28	0 36	0 19	0 29	0 28	0 13	0 17	0 22	0 0	0 1	0 21	0 1	0 0	0 4	0 36	0 36	0 0	0 0	0 5	0 12	0 13	0 3	0 32	0 0	0 0	0 0	0 0	0 0	0 0	0 1	0 1	0 0	0 0	0 0	0 0	0 0	0 0	0 0	0 0	0 0
tig00001299	1103869	G	A	0 14	0 25	0 32	0 4	0 22	0 13	4 24	0 36	0 19	0 29	0 27	0 13	3 14	0 21	0 0	0 1	0 21	0 1	0 0	0 4	0 36	11 25	0 0	0 0	0 5	0 12	0 13	0 3	0 32	0 0	0 0	0 0	0 0	0 0	0 0	1 0	0 1	0 0	0 0	0 0	0 0	0 0	0 0	0 0	0 0	0 0
tig00001299	1103883	G	A	0 14	0 25	0 33	0 4	0 22	0 13	0 28	0 36	0 18	0 29	0 28	0 13	0 17	0 22	0 0	0 1	0 21	0 1	0 0	0 4	0 36	0 36	0 0	0 0	0 5	0 12	0 13	0 3	0 32	0 0	0 1	0 0	0 0	0 0	0 1	0 0	0 1	0 0	0 0	0 0	0 0	0 0	0 1	0 0	0 0	0 1
tig00001299	1103885	G	A	0 14	0 25	0 33	0 4	0 22	0 13	0 28	0 36	0 19	0 29	0 28	0 13	0 17	0 22	0 0	0 1	0 21	0 1	0 0	0 4	0 36	0 36	0 0	0 0	0 5	0 12	0 13	0 3	0 32	0 0	0 1	0 0	0 0	0 0	0 1	0 0	0 1	0 0	0 0	0 0	0 0	0 0	0 1	0 0	0 0	0 1
tig00001299	1103893	G	A	0 14	0 25	0 33	0 4	0 22	0 13	0 28	0 36	0 19	0 29	0 28	0 13	0 17	0 22	0 0	0 1	0 21	0 1	0 0	0 4	0 36	0 36	0 0	0 0	0 5	0 12	0 13	0 3	0 32	0 0	0 1	0 0	0 0	0 0	0 1	0 1	0 1	0 0	0 0	0 0	0 0	0 0	1 0	0 0	0 0	0 1
tig00001299	1103900	C	T	14 0	25 0	33 0	4 0	22 0	13 0	28 0	36 0	19 0	28 0	28 0	10 3	17 0	22 0	0 0	1 0	21 0	1 0	0 0	4 0	36 0	36 0	0 0	0 0	5 0	12 0	13 0	3 0	32 0	0 0	0 1	0 0	0 0	0 0	1 0	0 0	0 1	0 0	0 0	0 0	0 0	0 0	1 0	0 0	0 0	1 0
tig00001299	1103906	C	T	0 14	4 21	0 33	0 4	0 20	0 13	4 24	0 36	0 19	5 24	0 29	8 5	7 10	0 20	0 0	0 1	0 21	0 1	0 0	0 4	0 37	0 36	0 0	0 0	0 5	0 12	0 13	0 3	0 32	0 0	0 1	0 0	0 0	0 0	0 0	0 0	0 1	0 0	0 0	0 0	0 0	0 0	0 0	0 0	0 0	0 0
tig00001299	1103908	A	G	0 14	0 25	0 33	0 4	0 22	0 13	0 27	0 36	0 19	0 29	2 28	0 13	0 17	0 22	0 0	0 1	0 21	0 1	0 0	0 4	1 36	0 36	0 0	0 0	0 5	0 12	0 13	0 3	0 32	0 0	1 0	0 0	0 0	0 0	1 0	0 0	1 0	0 0	0 0	0 0	0 0	0 0	1 0	0 0	0 0	1 0
tig00001299	1103910	T	C	0 14	0 25	0 33	0 4	0 22	0 13	0 28	0 36	0 19	0 29	0 30	3 10	0 17	0 22	0 0	0 1	0 21	0 1	0 1	0 4	0 37	0 36	0 0	0 1	0 5	0 12	0 13	0 3	0 32	0 0	0 1	0 0	0 0	0 0	0 1	0 0	0 1	0 0	0 0	0 0	0 0	0 0	0 1	0 0	0 0	0 1
tig00001299	1103932	G	A	8 0	17 0	17 0	4 0	16 0	11 0	17 0	22 0	13 0	16 0	18 2	11 0	15 0	9 0	0 0	0 0	14 1	1 0	0 0	2 0	21 1	26 0	0 0	0 1	2 0	9 0	9 0	1 0	16 0	0 0	0 1	0 0	0 0	0 0	0 1	0 0	0 1	0 0	0 0	0 0	0 0	0 0	0 1	0 0	0 0	0 1
tig00001299	1103935	G	A	0 7	0 14	0 14	0 2	0 13	0 11	0 15	0 20	0 10	0 13	0 16	0 8	0 13	0 5	0 0	0 0	0 14	0 1	0 1	0 2	0 17	0 21	0 0	0 1	0 2	0 9	0 8	0 1	0 16	0 0	0 1	0 0	0 0	0 0	0 1	0 0	0 1	0 0	0 0	0 0	0 0	0 0	0 1	0 0	0 0	0 1
tig00001299	1103963	G	GAAGC	0 0	0 0	0 0	0 0	0 0	0 0	0 0	0 0	0 0	0 0	0 0	0 0	0 0	0 0	0 0	0 0	0 0	0 0	0 0	0 0	0 0	0 0	0 0	0 0	0 0	0 0	0 0	0 0	0 0	0 0	0 0	0 0	0 0	0 0	0 0	0 0	0 0	0 0	0 0	0 0	0 0	0 0	0 0	0 0	0 0	0 0
tig00001299	1103990	C	T	0 1	0 0	0 0	0 0	0 0	0 0	0 0	0 0	0 0	0 0	0 2	0 0	0 0	0 0	0 0	0 0	0 0	0 0	0 0	0 0	0 1	0 0	0 0	0 0	0 0	0 0	0 0	0 0	0 0	0 0	0 0	0 0	0 0	0 0	0 0	0 0	0 2	0 0	0 0	0 0	0 0	0 0	0 0	0 0	0 0	0 0
tig00001299	1104047	A	G	0 2	0 0	0 1	0 0	0 0	0 1	0 0	0 0	0 0	0 1	0 0	0 0	0 3	0 0	0 0	0 0	0 0	0 0	0 0	0 0	0 1	0 0	0 0	0 0	0 0	0 0	0 0	0 0	0 0	0 0	0 0	0 0	0 0	0 1	0 0	0 0	0 0	0 0	0 0	0 0	0 0	0 0	0 0	0 1	0 0	0 0
tig00001299	1104068	T	A	0 2	0 0	0 1	0 2	0 0	0 1	0 0	0 0	0 0	0 8	0 0	0 0	0 3	0 0	0 0	0 0	0 0	0 2	0 4	0 0	0 1	0 8	0 4	0 6	0 5	0 2	0 2	0 5	0 0	0 3	0 6	0 0	0 0	0 1	0 2	0 1	0 0	0 0	0 0	0 1	0 0	0 0	0 0	0 1	0 1	0 0
tig00001299	1104071	C	T	0 2	0 0	0 1	0 2	0 0	0 0	0 0	0 0	0 0	0 8	0 0	0 0	0 3	0 0	0 0	0 0	0 0	0 2	0 4	0 0	0 1	0 8	0 4	0 6	0 5	0 2	0 2	0 5	0 0	0 3	0 7	0 0	0 0	0 1	0 4	0 1	0 0	0 0	0 0	1 0	0 0	0 0	0 0	0 1	0 1	0 0
tig00001299	1104072	A	C	0 2	0 0	0 0	0 2	0 0	0 0	0 0	0 0	0 0	0 8	0 0	0 0	0 3	0 0	0 0	0 0	0 0	0 2	0 4	0 0	0 1	0 8	0 3	0 6	0 5	0 2	0 2	0 5	0 0	0 3	0 7	0 0	0 0	0 1	0 4	0 1	0 0	0 0	0 0	0 1	0 0	0 0	0 0	0 1	0 1	0 0
tig00001299	1104084	C	T	0 2	0 0	0 1	0 2	0 0	0 0	0 0	0 0	0 0	0 8	0 0	0 0	0 3	0 0	0 0	0 0	0 0	0 2	0 4	0 0	0 1	0 8	0 4	0 6	0 5	0 2	0 2	0 5	0 0	0 3	0 7	0 0	0 0	0 0	0 8	0 1	0 0	0 0	0 0	0 1	0 0	0 0	0 0	0 1	0 1	0 0
tig00001299	1104089	G	T	0 2	0 0	0 1	0 2	0 0	0 0	0 0	0 0	0 0	0 8	0 0	0 0	0 2	0 0	0 0	0 0	0 0	0 2	0 4	0 0	0 1	0 8	0 4	0 6	0 5	0 2	0 2	0 5	0 0	0 3	0 7	0 0	0 0	0 0	0 7	0 1	0 0	0 0	0 0	0 0	0 0	0 0	0 0	0 1	0 1	0 0
tig00001299	1104109	G	A	0 0	0 0	0 0	0 2	0 0	0 0	0 0	0 0	0 0	0 7	0 0	0 0	0 0	0 0	0 0	0 0	0 0	0 2	0 4	0 0	0 0	0 8	0 4	0 6	0 5	0 2	0 2	0 5	0 0	0 3	0 0	0 0	0 0	0 0	0 8	0 0	0 0	0 0	0 0	0 0	0 0	0 0	0 0	0 2	0 1	0 0
tig00001299	1104110	T	C	0 0	0 0	0 0	0 2	0 0	0 0	0 0	0 0	0 0	0 7	0 0	0 0	0 0	0 0	0 0	0 0	0 0	0 2	0 4	0 0	0 0	0 8	0 4	0 6	0 5	0 2	0 2	0 5	0 0	0 3	0 0	0 0	0 0	0 0	0 8	0 0	0 0	0 0	0 0	0 0	0 0	0 0	0 0	1 1	0 1	0 0
tig00001299	1104110	TTG	CTA	0 0	0 0	0 0	0 2	0 0	0 0	0 0	0 0	0 0	0 7	0 0	0 0	0 0	0 0	0 0	0 0	0 0	0 2	0 4	0 0	0 0	0 8	0 4	0 6	0 5	0 2	0 2	0 5	0 0	0 3	0 0	0 0	0 0	0 0	0 8	0 0	0 0	0 0	0 0	0 0	0 0	0 0	0 0	0 1	0 1	0 0
tig00001299	1104116	T	G	0 0	0 0	0 0	0 2	0 0	0 0	0 0	0 0	0 0	0 7	0 0	0 0	0 0	0 0	0 0	0 0	0 0	0 2	0 4	0 0	0 0	0 8	0 4	0 6	0 5	0 2	0 2	0 5	0 0	0 3	0 0	0 0	0 0	0 0	0 7	0 0	0 0	0 1	0 0	0 0	0 0	0 0	0 0	0 3	0 1	0 0
tig00001299	1104119	A	G	0 0	0 0	0 0	0 2	0 0	0 0	0 0	0 0	0 0	0 7	0 0	0 0	0 0	0 0	0 0	0 0	0 0	0 2	0 4	0 0	0 0	0 8	0 4	0 6	0 5	0 2	0 2	0 5	0 0	0 3	0 0	0 0	0 0	0 0	0 8	0 0	0 0	0 1	0 0	0 0	0 0	0 0	0 0	0 3	0 1	0 0
tig00001299	1104127	G	A	0 0	0 0	0 0	0 2	0 0	0 0	0 0	0 0	0 0	2 0	0 0	0 0	0 0	0 0	0 0	0 0	0 0	0 0	1 0	0 0	0 0	1 0	1 1	0 3	0 5	0 0	0 2	2 1	0 0	0 0	0 0	0 0	0 0	0 0	0 8	0 0	0 0	1 0	0 0	0 0	0 0	0 0	0 0	3 0	0 1	0 0
tig00001299	1104134	T	C	0 0	0 0	0 0	0 0	0 0	0 0	0 0	0 0	0 0	0 0	0 0	0 0	0 0	0 0	0 0	0 0	0 0	0 0	0 0	0 0	0 0	0 0	0 0	0 0	0 0	0 0	0 0	0 0	0 0	0 0	0 0	0 0	0 0	0 0	0 0	0 0	0 0	0 0	0 0	0 0	0 0	0 0	0 0	0 0	0 0	0 0
tig00001299	1104134	TG	CA	0 0	0 0	0 0	0 0	0 0	0 0	0 0	0 0	0 0	0 0	0 0	0 0	0 0	0 0	0 0	0 0	0 0	0 0	0 0	0 0	0 0	0 0	0 0	0 0	0 0	0 0	0 0	0 0	0 0	0 0	0 0	0 0	0 0	0 0	7 0	0 0	0 0	0 0	0 0	0 0	0 0	0 0	0 0	1 0	1 0	0 0
tig00001299	1104147	TT	AA	0 0	0 0	0 0	0 0	0 0	0 0	0 0	0 0	0 0	0 0	0 0	0 0	0 0	0 0	0 0	0 0	0 0	0 0	0 0	0 0	0 0	0 0	0 0	0 0	0 0	0 0	0 0	0 0	0 0	0 0	0 0	0 0	0 1	0 0	6 2	0 2	0 0	0 2	0 2	0 0	0 0	0 2	0 1	0 6	1 0	0 0
tig00001299	1104159	G	A	0 0	0 0	0 0	0 0	0 0	0 1	0 0	0 0	0 0	0 0	0 0	0 0	0 0	0 0	0 0	0 0	0 0	0 0	0 0	0 0	0 0	0 0	0 0	0 0	0 0	0 0	0 0	0 0	0 0	0 0	0 0	0 0	0 1	0 0	0 8	0 4	0 9	0 8	0 2	0 0	0 0	0 4	0 4	0 13	0 3	0 0
tig00001299	1104161	A	G	0 0	0 0	0 0	0 0	0 0	1 0	0 0	0 0	0 0	0 0	0 0	0 0	0 0	0 0	0 0	0 0	0 0	0 0	0 0	0 0	0 0	0 0	0 0	0 0	0 0	0 0	0 0	0 0	0 0	0 0	0 0	0 0	1 0	0 0	9 0	4 0	9 0	8 0	2 0	0 0	0 0	5 0	4 0	13 0	3 0	0 0
tig00001299	1104167	G	GC	0 0	0 0	0 0	0 0	0 0	0 2	0 0	0 0	0 0	0 0	0 0	0 0	0 0	0 0	0 0	0 0	0 0	0 0	0 0	0 0	0 0	0 0	0 0	0 0	0 0	0 0	0 0	0 0	0 0	0 0	0 0	0 0	0 1	0 0	0 9	0 4	6 2	1 8	0 2	0 0	0 0	0 5	1 3	1 12	0 2	0 0
tig00001299	1104170	AAATGT	CAATGAGC	0 0	0 0	0 0	0 0	0 0	0 0	0 0	0 0	0 0	0 0	0 0	0 0	0 0	0 0	0 0	0 0	0 0	0 0	0 0	0 0	0 0	0 0	0 0	0 0	0 0	0 0	0 0	0 0	0 0	0 0	0 0	0 0	0 0	0 0	6 0	0 0	0 0	2 0	0 0	0 0	0 0	0 0	2 0	1 0	2 0	0 0
tig00001299	1104175	T	C	0 0	1 0	0 0	0 0	0 0	1 0	0 0	0 0	0 0	0 0	0 0	0 0	0 0	0 0	0 0	0 0	0 0	0 0	0 0	0 0	0 0	0 0	0 0	0 0	0 0	0 0	0 0	1 0	0 0	0 0	0 0	0 0	4 0	5 0	10 0	4 0	9 0	16 0	7 0	5 0	8 0	8 0	12 0	15 0	4 0	3 0
tig00001299	1104186	T	C	0 0	0 3	0 0	0 3	0 3	0 8	0 0	0 0	0 0	0 0	0 0	0 0	0 0	0 0	0 0	0 1	0 1	0 0	0 4	0 0	0 0	0 0	0 0	0 7	0 0	0 3	0 0	0 1	0 0	0 0	0 0	0 0	0 11	0 6	0 24	0 16	0 14	0 30	0 11	0 6	0 13	0 11	0 24	0 25	0 12	0 9
tig00001299	1104187	G	A	0 0	0 3	0 0	0 3	0 3	0 8	0 0	0 0	0 0	0 0	0 0	0 0	0 0	0 0	0 0	0 1	0 1	0 0	0 4	0 0	0 0	0 0	0 0	0 7	0 0	0 3	0 0	0 1	0 0	0 0	0 0	0 0	0 11	0 6	0 24	0 16	0 15	0 30	0 12	0 6	0 13	0 11	0 24	0 25	0 13	0 9
tig00001299	1104193	G	A	0 0	0 3	0 0	0 3	0 3	0 8	0 0	0 0	0 0	0 0	0 0	0 0	0 0	0 0	0 0	0 1	0 1	0 0	0 4	0 1	0 0	0 0	0 0	0 7	0 0	0 3	0 0	0 1	0 0	0 0	0 0	0 0	2 9	0 6	2 22	0 16	0 15	2 28	2 10	0 6	0 13	0 11	6 18	2 23	2 10	3 6
tig00001299	1104201	T	A	0 0	0 3	0 0	0 3	3 0	0 8	0 0	0 0	0 0	0 0	0 0	0 0	0 0	0 0	0 0	0 1	0 1	0 0	0 4	0 1	0 0	0 0	0 0	0 7	0 0	0 3	0 0	0 1	0 0	0 0	0 0	0 0	0 13	0 6	2 24	0 16	0 15	0 30	2 10	1 5	0 13	0 11	0 27	2 27	0 12	0 10
tig00001299	1104208	A	T	0 0	0 3	0 0	0 3	3 0	8 0	0 0	0 0	0 0	0 0	0 0	0 0	0 0	0 0	0 0	0 1	0 1	0 0	0 4	0 1	0 0	0 0	0 0	0 7	0 0	0 3	0 0	0 1	0 0	0 0	0 0	0 0	1 12	0 6	3 27	0 16	2 13	4 25	2 10	1 6	0 13	3 9	2 28	15 16	0 11	0 10
tig00001299	1104233	CA	C	0 0	0 0	0 0	0 0	0 0	0 0	0 0	0 0	0 0	0 0	0 0	0 0	0 0	0 0	0 0	0 0	0 0	0 0	0 0	0 0	0 0	0 0	0 0	0 0	0 0	0 0	0 0	0 0	0 0	0 0	0 0	0 0	0 0	0 0	0 0	0 0	0 0	0 0	0 0	0 0	0 0	0 0	0 0	0 0	0 0	0 0
tig00001299	1104255	TTGAGT	AGAGA	0 15	0 9	0 9	0 7	0 11	0 26	0 10	0 34	0 14	0 0	0 20	0 15	0 13	0 7	0 0	0 1	0 1	0 0	0 5	0 6	0 27	0 12	0 0	0 9	0 0	0 4	0 7	0 1	0 0	0 1	0 2	0 0	0 22	0 13	0 30	0 24	0 17	0 22	0 14	0 15	0 24	0 12	0 39	0 43	0 22	0 14
tig00001299	1104257	G	A	0 15	0 9	0 9	0 7	0 11	0 26	0 10	0 34	0 14	0 0	0 20	0 15	0 13	0 7	0 0	0 1	0 1	0 0	0 5	0 6	0 27	0 12	0 0	0 9	0 0	0 4	0 7	0 1	0 0	0 1	0 2	0 0	0 22	0 13	0 30	0 24	0 17	11 22	0 14	0 15	0 24	0 12	0 39	0 43	0 22	0 14
tig00001299	1104267	A	ATCC	0 0	0 2	0 0	0 0	0 0	0 1	0 0	0 0	0 0	0 0	0 0	0 0	0 0	0 0	0 0	0 0	0 0	0 0	0 1	0 1	0 0	0 0	0 0	0 0	0 0	0 1	0 0	0 0	0 0	0 0	0 2	0 0	6 2	0 0	9 9	0 6	0 3	3 4	2 2	3 3	0 8	0 1	14 3	8 8	5 2	2 7
tig00001299	1104269	C	T	6 0	1 2	3 0	0 0	5 0	8 1	6 0	10 0	1 0	0 0	7 0	7 0	7 0	2 0	0 0	0 0	0 0	0 0	0 1	1 1	9 0	3 0	0 0	0 0	0 0	0 1	0 0	0 0	0 0	0 0	0 2	0 0	0 2	0 0	0 9	0 6	0 3	0 4	0 2	0 3	0 8	0 1	0 3	0 8	0 2	0 7
tig00001299	1104272	C	T	0 0	0 2	0 0	0 0	0 0	0 1	0 0	0 0	0 0	0 0	0 0	0 0	0 0	0 0	0 0	0 0	0 0	0 0	0 1	0 1	0 0	0 0	0 0	0 0	0 0	0 1	0 0	0 0	0 0	0 0	0 2	0 0	6 2	4 0	0 9	4 6	0 3	0 4	0 2	2 3	4 8	0 1	0 3	4 8	2 2	0 7
tig00001299	1104278	C	T	0 0	0 2	0 0	0 0	0 0	0 1	0 0	0 0	0 0	0 0	0 0	0 0	0 0	0 0	0 0	0 0	0 0	0 0	0 1	0 1	0 0	0 0	0 0	0 0	0 0	0 1	0 0	0 0	0 0	0 0	0 2	0 0	0 2	0 0	0 9	6 6	0 3	11 4	0 2	0 3	0 8	0 1	7 3	1 8	0 2	0 7
tig00001299	1104280	A	G	0 0	3 2	0 0	0 0	0 0	0 1	0 0	6 0	5 0	0 0	0 0	1 0	0 0	0 0	0 0	0 0	1 0	0 0	0 1	0 1	8 0	0 0	0 0	0 0	0 0	0 1	3 0	0 0	0 0	0 0	0 2	0 0	0 2	0 0	0 9	0 6	0 3	0 4	0 2	0 3	0 8	0 1	0 3	0 8	0 2	0 7
tig00001299	1104284	A	C	0 0	0 0	0 0	0 0	0 0	0 0	0 0	0 0	0 0	0 0	0 0	0 0	0 0	0 0	0 0	0 0	0 0	0 0	0 0	0 0	0 0	0 0	0 0	0 0	0 0	0 0	0 0	0 0	0 0	0 0	0 1	0 0	0 6	0 0	0 12	2 9	0 2	0 16	0 2	0 2	0 8	1 2	0 24	4 9	0 10	3 4
tig00001299	1104290	T	A	0 0	3 0	0 0	0 0	0 0	0 0	0 0	6 0	5 0	0 0	0 0	1 0	0 0	0 0	0 0	0 0	0 0	0 0	0 0	0 0	9 0	0 0	0 0	0 0	0 0	0 0	2 0	0 0	0 0	0 0	0 1	0 0	6 6	4 0	0 12	4 9	1 2	0 16	0 2	1 2	4 8	0 2	0 24	3 9	2 10	0 4
tig00001299	1104298	C	A	0 7	3 1	0 4	0 1	0 3	1 8	0 3	8 9	6 3	0 0	0 10	2 3	0 5	0 1	0 3	0 1	0 0	0 2	0 1	0 3	11 8	0 3	0 0	0 5	0 2	0 2	2 1	0 2	0 0	0 0	1 1	0 0	2 13	5 2	0 14	3 13	2 2	0 17	2 3	7 4	11 3	1 4	0 31	4 16	2 13	0 11
tig00001299	1104343	G	A	0 0	0 0	0 1	0 0	0 0	0 0	0 1	0 0	0 0	0 0	0 0	0 1	0 1	0 1	0 4	0 0	0 0	0 2	0 3	0 5	0 1	0 0	0 0	0 5	0 1	0 2	0 0	0 0	0 0	0 0	0 2	0 0	0 8	0 0	0 8	0 6	0 8	0 7	0 3	0 7	0 16	0 2	0 19	0 9	0 10	0 9
tig00001299	1104351	G	A	0 0	0 0	0 1	0 0	0 0	0 0	0 1	0 0	0 0	0 0	0 0	0 1	0 1	0 1	0 4	0 0	0 0	0 2	0 4	0 5	0 1	0 0	0 0	0 5	0 1	0 2	0 0	0 0	0 0	0 0	0 2	0 0	0 13	0 1	0 9	0 8	0 8	0 4	0 3	0 10	0 15	0 1	0 17	0 8	0 10	0 10
tig00001299	1104354	G	A	0 0	0 0	0 1	0 0	0 0	0 0	0 1	0 0	0 0	0 0	0 0	0 1	0 1	0 1	0 4	0 0	0 0	0 2	0 4	0 5	0 1	0 0	0 0	0 5	0 1	0 2	0 0	0 0	0 0	0 0	0 2	0 0	5 9	0 1	0 9	3 5	0 9	0 4	0 3	0 9	1 14	0 1	0 17	0 7	1 8	0 10
tig00001299	1104360	T	C	0 0	0 0	0 1	0 0	0 0	0 0	0 1	0 0	0 0	0 0	0 0	0 1	0 1	0 1	0 4	0 0	0 0	0 2	0 4	0 5	0 1	0 0	0 0	0 5	0 1	0 2	0 0	0 0	0 0	0 0	1 1	0 0	11 2	0 0	9 0	4 2	1 7	4 0	2 1	4 3	2 13	0 1	15 2	6 0	7 0	10 0
tig00001299	1104373	G	GTC	0 0	0 0	0 0	0 0	0 0	0 0	0 1	0 0	0 0	0 0	0 0	0 1	0 1	0 2	0 2	0 0	0 1	0 0	0 4	0 5	0 1	0 0	0 0	0 0	0 0	0 0	0 0	0 0	0 0	0 0	0 6	0 0	2 4	0 0	3 1	2 2	6 1	2 0	3 0	4 1	6 0	1 0	6 8	3 0	6 0	2 6
tig00001299	1104374	T	A	0 0	0 0	0 0	0 0	0 0	0 0	0 1	0 0	0 0	0 0	0 0	0 1	0 1	0 2	0 2	0 0	0 1	0 0	0 4	0 5	0 1	0 0	0 0	0 0	0 0	0 0	0 0	0 0	0 0	0 0	0 6	0 0	0 4	0 0	0 1	0 2	0 1	0 0	0 0	0 1	0 0	0 0	0 8	0 0	0 0	0 6
tig00001299	1104403	AT	TA	0 0	0 0	0 0	0 0	0 0	0 0	0 1	0 0	0 1	0 0	0 0	0 1	0 0	0 0	0 1	0 0	0 0	0 0	0 4	0 5	0 0	0 0	0 0	0 0	0 0	0 0	0 0	0 0	0 0	0 0	0 4	0 0	2 2	0 0	3 0	2 0	6 0	1 0	3 0	3 0	5 0	1 0	4 6	0 0	3 0	2 4
tig00001299	1104407	C	T	0 3	0 0	0 0	0 0	0 0	0 0	0 1	0 0	0 1	0 0	0 0	0 1	0 1	0 2	0 1	0 0	0 1	0 1	0 4	0 6	0 0	0 0	0 0	0 0	0 0	0 0	0 0	0 0	0 0	0 0	0 10	0 0	0 4	0 1	0 3	0 3	0 7	0 1	0 3	0 4	0 6	0 0	0 11	0 0	0 3	0 6
tig00001299	1104414	C	T	0 4	0 0	0 0	0 0	0 0	0 0	0 0	0 0	0 1	0 0	0 0	0 2	0 2	0 3	0 1	0 0	0 1	0 1	0 4	0 5	0 0	0 0	0 0	0 0	0 0	0 0	0 0	0 0	0 0	0 0	0 10	0 0	0 4	0 1	0 3	2 1	6 1	0 1	1 2	2 2	5 1	1 5	0 9	0 0	0 3	0 5
tig00001299	1104418	C	T	0 4	0 0	0 0	0 0	0 0	0 0	0 1	0 0	0 1	0 0	0 0	0 2	0 2	0 3	0 0	0 0	0 1	0 1	0 4	0 3	0 0	0 0	0 0	0 0	0 0	0 0	0 0	0 0	0 0	0 0	0 11	0 0	2 2	0 1	3 0	0 3	0 7	1 0	2 1	1 3	0 6	0 6	2 5	0 0	3 0	1 3
tig00001299	1104419	G	A	0 4	0 0	0 0	0 0	0 0	0 0	0 1	0 0	0 1	0 0	0 0	0 2	0 2	0 3	0 0	0 0	0 1	0 1	0 4	0 2	0 0	0 0	0 0	0 0	0 0	0 0	0 0	0 0	0 0	0 0	0 10	0 0	0 4	0 1	0 3	0 3	0 7	0 1	0 3	0 3	0 6	0 6	0 7	0 0	0 3	0 4
tig00001299	1104428	A	T	0 4	0 0	0 0	0 0	0 0	0 0	0 0	0 0	0 1	0 0	0 0	0 2	0 2	0 3	0 0	0 0	0 1	0 0	0 2	0 2	0 0	0 0	0 0	0 0	0 0	0 0	0 0	0 0	0 0	0 0	0 7	0 0	2 2	0 1	3 0	2 1	5 1	1 0	3 0	3 0	4 1	1 5	2 5	0 0	2 0	1 3
tig00001299	1104430	GGG	TGA	0 4	0 0	0 0	0 0	0 0	0 0	0 0	0 0	0 1	0 0	0 0	0 1	0 2	0 3	0 0	0 0	0 1	0 0	0 2	0 1	0 0	0 0	0 0	0 0	0 0	0 0	0 0	0 0	0 0	0 0	0 7	0 0	0 3	0 1	0 3	0 3	0 5	0 1	0 3	0 3	0 6	0 6	0 6	0 0	0 2	0 4
tig00001299	1104431	G	A	0 4	0 0	0 0	0 0	0 0	0 0	0 0	0 0	0 1	0 0	0 0	0 1	0 2	0 3	0 0	0 0	0 1	0 0	0 2	0 1	0 0	0 0	0 0	0 0	0 0	0 0	0 0	0 0	0 0	0 0	0 7	0 0	0 3	0 1	0 3	0 3	0 5	0 1	0 3	0 3	0 6	0 6	0 6	0 0	0 2	0 4
tig00001299	1104433	G	A	0 4	0 0	0 0	0 0	0 0	0 0	0 0	0 0	0 1	0 0	0 0	0 1	0 2	0 3	0 0	0 0	0 1	0 0	0 2	0 1	0 0	0 0	0 0	0 0	0 0	0 0	0 0	0 0	0 0	0 0	0 7	0 0	0 3	0 1	0 3	0 3	0 6	0 1	0 3	0 3	0 6	0 6	0 6	0 0	0 2	0 4
tig00001299	1104436	T	C	0 4	0 0	0 0	0 0	0 0	0 0	0 0	0 0	0 1	0 0	0 0	0 1	0 1	0 3	0 0	0 0	0 1	0 0	0 0	0 1	0 0	0 0	0 0	0 0	0 0	0 0	0 0	0 0	0 0	0 0	0 0	0 0	2 0	0 1	2 0	2 1	5 0	1 0	2 0	3 0	5 1	1 2	2 0	0 0	2 0	1 0
tig00001299	1104438	G	A	0 4	0 0	0 0	0 0	0 0	0 0	0 0	0 0	0 1	0 0	0 0	0 1	0 1	0 2	0 0	0 0	0 1	0 0	0 0	0 1	0 0	0 0	0 0	0 0	0 0	0 0	0 0	0 0	0 0	0 0	0 7	0 0	0 2	0 1	0 2	0 3	0 6	0 1	0 2	0 3	0 6	0 6	0 3	0 0	0 2	0 1
tig00001299	1104451	T	TGATTC	0 0	0 0	0 0	0 0	0 0	0 0	0 0	0 0	0 0	0 0	0 0	0 0	0 0	0 0	0 0	0 0	0 0	0 0	0 0	0 0	0 0	0 0	0 0	0 0	0 0	0 0	0 0	0 0	0 0	0 0	0 0	0 0	0 0	0 0	0 0	0 0	0 0	0 0	0 0	0 0	0 0	0 0	0 0	0 0	0 0	0 0
tig00001299	1104467	T	TC	0 0	0 0	0 0	0 0	0 0	0 0	0 0	0 0	0 0	0 0	0 0	0 0	0 0	0 0	0 0	0 0	0 0	0 0	0 0	0 0	0 0	0 0	0 0	0 0	0 0	0 0	0 0	0 0	0 0	0 3	0 8	0 0	0 0	0 0	0 0	0 0	0 0	0 0	0 0	0 1	0 0	0 0	0 0	0 0	0 0	0 0
tig00001299	1104512	T	C	0 0	0 0	0 0	0 0	0 0	0 0	0 0	0 0	0 0	0 0	0 0	0 0	0 0	0 0	0 0	0 0	0 0	0 0	0 0	0 0	0 0	0 0	0 0	0 0	0 0	0 0	0 0	0 0	0 0	2 1	4 5	0 0	0 0	0 2	0 0	0 0	0 4	0 0	0 2	0 4	0 4	0 4	0 0	0 0	0 0	0 2
tig00001299	1104520	T	C	0 0	0 0	0 0	0 0	0 0	0 0	0 0	0 0	0 0	0 0	0 0	0 0	0 0	0 0	0 0	0 0	0 0	0 0	0 0	0 0	0 0	0 0	0 0	0 0	0 0	0 0	0 0	0 0	0 0	3 0	7 0	0 0	0 0	0 2	0 0	0 0	0 6	0 0	0 2	4 0	2 2	0 4	0 0	0 0	0 0	1 2
tig00001299	1104631	T	C	20 0	27 0	35 0	6 0	19 0	19 0	18 0	30 0	25 0	31 0	37 0	18 0	26 0	27 0	6 0	6 0	6 0	10 0	11 0	9 0	36 0	16 10	9 0	8 0	4 0	2 0	15 0	7 0	18 0	4 0	6 0	1 0	0 28	0 7	0 17	0 7	0 8	0 11	0 10	0 13	0 16	0 14	0 12	0 17	0 13	0 11
tig00001299	1104645	A	G	27 0	37 0	44 0	7 0	23 0	21 0	21 0	46 0	31 0	41 0	52 0	26 0	36 0	33 0	6 0	8 0	8 0	12 0	11 0	10 0	45 0	21 12	11 0	11 0	4 0	4 0	19 0	10 0	26 0	0 4	0 9	0 1	0 27	0 7	0 17	0 9	0 8	0 11	0 10	0 11	0 16	0 14	0 12	0 18	0 13	0 11
tig00001299	1104669	G	T	0 37	0 47	0 54	0 13	0 43	0 26	0 29	0 58	0 42	0 49	0 66	0 32	0 43	0 43	0 7	0 10	0 14	0 17	0 14	0 12	0 56	0 38	0 19	0 14	0 7	0 7	0 26	0 13	0 37	0 6	0 14	0 1	0 28	0 7	0 17	0 9	0 8	0 11	0 10	0 9	0 15	0 14	0 12	0 18	0 12	0 10
tig00001299	1104680	C	A	0 31	0 41	0 50	0 13	0 32	0 24	0 28	0 56	0 39	0 45	0 59	0 30	0 42	0 41	0 7	0 10	0 13	0 16	0 14	0 12	0 50	0 34	0 19	0 14	0 6	0 7	0 24	0 11	0 35	0 5	0 14	0 1	0 27	0 6	0 17	0 9	0 5	0 8	0 7	0 9	0 14	0 13	0 9	0 14	0 12	0 8
tig00001299	1104724	T	A	0 18	0 19	0 20	0 6	0 21	0 8	0 12	0 32	0 19	0 20	0 30	0 14	0 19	0 16	0 2	0 5	0 7	0 7	0 6	0 4	0 21	0 12	0 10	0 6	0 3	0 6	0 13	0 5	0 17	0 2	0 8	0 1	0 16	0 4	0 5	0 7	0 0	0 3	0 5	0 8	0 8	0 9	0 5	0 2	0 8	0 5
tig00001299	1104741	A	G	0 11	0 13	0 11	0 4	0 12	0 6	0 8	0 16	0 9	0 12	0 14	0 8	0 8	0 11	0 1	0 3	0 6	0 6	0 3	0 2	0 14	0 5	0 8	0 3	0 2	0 3	0 6	0 3	0 9	0 2	0 4	0 1	8 0	5 0	0 0	2 2	0 0	1 0	4 0	6 0	7 0	8 0	4 0	2 0	4 0	5 0
tig00001299	1104764	T	A	1 0	0 0	0 0	0 0	1 0	0 0	0 0	1 0	0 0	2 0	0 0	0 0	1 0	0 0	0 0	0 0	0 0	0 0	0 0	1 0	1 0	2 0	1 0	0 0	0 0	0 0	1 0	0 0	0 0	0 0	0 0	1 0	0 0	0 0	0 0	0 0	0 0	0 0	0 0	0 0	0 0	0 0	0 0	0 0	0 0	0 0
tig00001299	1104794	G	A	25 0	15 0	14 0	6 0	10 0	21 0	16 0	20 0	8 0	12 0	21 0	10 0	10 0	7 0	1 0	4 0	5 0	4 0	2 0	7 0	22 0	11 0	5 0	1 0	2 0	5 0	9 0	5 0	10 0	4 0	8 0	0 0	4 0	7 0	7 0	5 0	5 0	11 0	14 0	5 0	11 0	7 0	2 0	8 0	10 0	6 0
tig00001299	1104794	GCC	ACT	0 0	0 0	0 0	0 0	0 0	0 0	0 0	0 0	0 0	0 0	0 0	0 0	0 0	0 0	0 0	0 0	0 0	0 0	0 0	0 0	0 0	0 0	0 0	0 0	0 0	0 0	0 0	0 0	0 0	2 0	2 0	0 0	0 0	0 0	0 0	0 0	0 0	0 0	0 0	0 0	0 0	0 0	0 0	0 0	0 0	0 0
tig00001299	1104820	CT	C	0 37	0 28	0 27	0 7	0 23	0 36	0 33	0 29	0 21	0 19	0 40	0 6	0 25	0 17	0 3	0 6	0 9	0 8	0 3	0 11	0 33	0 8	0 9	0 6	0 6	0 12	0 12	0 12	0 27	0 17	0 28	0 1	7 0	9 0	10 0	8 3	6 0	12 0	17 0	6 0	16 0	12 0	7 0	8 0	11 0	8 0
tig00001299	1104820	C	CT	0 37	0 28	0 27	0 7	0 23	0 36	0 33	0 29	0 21	0 19	0 40	16 6	0 25	0 17	0 3	0 6	0 9	0 8	0 3	0 11	0 33	0 8	0 9	0 6	0 6	0 12	0 12	0 12	0 27	0 17	0 28	0 1	0 0	0 0	0 0	0 3	0 0	0 0	0 0	0 0	0 0	0 0	0 0	0 0	0 0	0 0
tig00001299	1104827	T	A	0 37	0 28	0 27	0 7	0 23	0 36	0 33	0 29	0 21	0 19	0 40	0 6	0 25	0 17	0 3	0 6	0 9	0 8	0 3	0 11	0 33	13 8	0 9	0 6	0 6	0 12	0 12	0 12	0 27	0 17	0 28	0 1	0 0	0 0	0 0	0 3	0 0	0 0	0 0	0 0	0 0	0 0	0 0	0 0	0 0	0 0
tig00001299	1104836	C	T	0 52	0 46	0 45	0 11	0 29	0 48	0 39	0 43	0 32	0 24	0 54	0 31	0 31	0 25	0 6	0 9	0 13	0 10	0 14	0 18	0 45	0 26	0 17	0 8	0 6	0 20	0 26	0 20	0 37	0 28	0 37	0 2	9 0	13 0	15 0	11 4	9 0	16 0	16 0	10 0	20 0	17 0	10 0	9 0	14 0	9 0
tig00001299	1104842	A	T	0 55	0 47	0 50	0 12	0 34	0 51	0 41	0 48	0 34	0 27	0 59	0 33	0 37	0 27	0 6	0 10	0 14	0 12	0 16	0 21	0 46	0 30	0 17	0 10	0 10	0 22	0 28	0 21	0 41	0 30	0 40	0 2	0 9	0 13	0 15	0 15	0 9	0 20	0 17	0 9	13 8	12 7	0 12	0 11	0 15	0 10
tig00001299	1104864	C	G	62 0	53 1	53 0	15 0	37 0	56 0	52 0	51 0	34 0	33 0	66 0	35 0	41 0	32 0	7 0	12 0	14 0	13 0	16 0	24 0	55 0	34 0	20 0	10 0	10 0	26 0	32 0	21 0	49 0	0 29	0 47	0 2	0 8	0 14	0 18	0 21	0 14	0 21	0 22	0 13	0 20	0 23	0 13	0 11	0 16	0 12
tig00001299	1104871	G	C	0 62	0 52	0 52	0 15	0 37	0 53	1 51	0 49	0 32	0 32	1 65	0 33	0 39	0 29	0 6	0 12	0 12	0 12	0 16	0 24	0 54	0 30	0 19	0 8	0 9	0 25	0 32	0 19	0 46	0 27	0 44	0 2	0 8	0 14	0 18	0 21	0 14	0 22	0 21	0 12	0 21	0 23	0 11	0 11	0 17	0 12
tig00001299	1104902	T	C	20 13	0 30	0 35	5 4	0 22	0 28	0 29	0 26	0 18	0 18	0 40	0 18	0 24	0 15	0 6	0 7	0 8	0 5	0 14	0 12	0 29	0 17	0 12	0 8	0 7	0 16	0 21	0 14	0 28	0 17	0 28	0 2	0 8	0 16	0 17	0 24	0 15	0 25	0 22	0 16	0 22	0 24	0 11	0 13	0 22	0 13
tig00001299	1104906	A	C	0 31	0 29	0 30	0 9	0 18	0 27	0 28	0 25	0 18	0 17	0 35	0 16	0 22	0 14	0 5	0 6	0 7	0 5	0 14	0 13	0 27	0 15	0 11	0 8	0 6	0 15	0 20	0 11	0 18	0 4	0 11	0 2	0 7	0 14	0 17	0 23	0 13	0 23	0 22	0 16	0 22	0 26	0 11	0 12	0 20	0 13
tig00001299	1104906	A	G	0 31	0 29	0 30	0 9	0 18	0 27	0 28	0 25	0 18	0 17	0 35	0 16	0 22	0 14	0 5	0 6	0 7	0 5	0 14	0 13	0 27	0 15	0 11	0 8	0 6	0 15	0 20	0 11	9 18	11 4	11 11	0 2	0 7	0 14	0 17	0 23	0 13	0 23	0 22	0 16	0 22	0 26	0 11	0 12	0 20	0 13
tig00001299	1104909	T	C	0 30	0 26	0 28	0 9	0 17	0 25	0 26	0 25	0 17	0 16	0 29	0 15	0 21	0 13	0 5	0 6	0 7	0 5	0 14	0 11	0 25	0 13	0 11	0 7	0 5	0 14	0 20	0 8	0 25	4 12	0 21	0 2	0 7	0 14	0 18	0 25	0 16	0 26	0 20	0 15	0 24	0 26	0 11	0 13	0 22	0 13
tig00001299	1104912	GAC	TAT	0 25	0 28	0 27	0 8	0 15	0 22	0 23	0 24	0 12	0 13	0 29	0 12	0 19	0 12	0 5	0 6	0 6	0 5	0 13	0 12	0 23	0 11	0 11	0 5	0 4	0 12	0 19	0 8	0 25	0 15	0 19	0 2	0 7	0 16	0 17	0 24	0 16	0 23	0 22	0 16	0 24	0 26	0 10	0 13	0 23	0 13
tig00001299	1104929	A	G	0 15	0 17	0 18	0 3	0 11	0 11	0 16	0 11	0 4	0 10	0 13	0 8	0 13	0 5	0 2	0 4	0 2	0 3	0 5	0 8	0 16	0 10	0 7	0 3	0 4	0 7	0 9	0 4	0 14	0 9	0 14	0 3	7 0	12 0	15 0	19 4	16 0	16 0	16 0	11 0	19 0	25 0	10 0	12 0	18 0	8 0
tig00001299	1104939	C	T	0 9	0 8	0 5	0 3	0 5	0 6	0 12	0 5	0 1	0 6	0 9	0 2	0 8	0 5	0 1	0 2	0 1	0 1	0 1	0 5	0 9	0 6	0 3	0 2	0 2	0 5	0 4	0 1	0 9	0 7	0 12	0 3	3 0	12 0	13 0	18 4	12 0	17 0	12 0	12 0	17 0	25 0	11 0	8 0	13 0	8 0
tig00001299	1104957	C	G	0 0	0 0	0 0	0 0	0 0	0 0	0 0	0 0	0 0	0 0	0 0	0 0	0 0	0 0	0 0	0 0	0 0	0 0	0 0	0 0	0 0	0 0	0 0	0 0	0 0	0 0	0 0	0 0	0 0	0 12	0 14	0 3	0 0	0 11	0 12	0 18	0 14	0 18	0 10	0 9	0 14	0 23	0 9	0 6	0 11	0 8
tig00001299	1104965	C	CA	0 0	0 0	0 0	0 0	0 0	0 0	0 0	0 0	0 0	0 0	0 0	0 0	0 0	0 0	0 0	0 0	0 0	0 0	0 0	0 0	0 0	0 0	0 0	0 0	0 0	0 0	0 0	0 0	0 0	6 6	9 8	0 3	0 1	0 11	0 11	0 15	0 12	0 17	0 9	0 10	0 11	0 20	0 8	0 6	0 11	0 7
tig00001299	1105023	G	A	0 0	0 0	0 0	0 0	0 0	0 0	0 0	0 0	0 0	0 0	0 0	0 0	0 0	0 0	0 0	0 0	0 0	0 0	0 0	0 0	0 0	0 0	0 0	0 0	0 0	0 0	0 0	0 0	0 0	0 22	0 30	0 5	0 1	0 8	0 7	0 8	0 5	0 8	0 5	0 5	0 8	0 15	0 3	0 4	0 7	0 3
tig00001299	1105033	C	T	0 0	0 0	0 0	0 0	0 0	0 0	0 0	0 0	0 0	0 0	0 0	0 0	0 0	0 0	0 0	0 0	0 0	0 0	0 0	0 0	0 0	0 0	0 0	0 0	0 0	0 0	0 0	0 0	0 0	0 22	0 29	0 5	0 1	0 4	0 7	0 8	0 4	0 5	0 5	0 5	0 7	0 15	0 3	0 2	0 7	0 3
tig00001299	1105034	G	A	0 0	0 0	0 0	0 0	0 0	0 0	0 0	0 0	0 0	0 0	0 0	0 0	0 0	0 0	0 0	0 0	0 0	0 0	0 0	0 0	0 0	0 0	0 0	0 0	0 0	0 0	0 0	0 0	0 0	0 22	14 15	5 0	0 1	0 4	0 7	0 8	0 4	0 5	0 5	0 5	0 7	0 15	0 3	0 2	0 7	0 3
tig00001299	1105068	G	A	0 0	0 0	0 0	0 0	0 0	0 0	0 0	0 0	0 0	0 0	0 0	0 0	0 0	0 0	0 0	0 0	0 0	0 0	0 0	0 0	0 0	0 0	0 0	0 0	0 0	0 0	0 0	0 0	0 0	0 12	0 24	0 5	1 0	3 0	5 0	2 1	3 0	3 0	5 0	2 0	5 0	10 0	2 0	2 0	1 0	2 0
tig00001299	1105075	G	A	0 0	0 0	0 0	0 0	0 0	0 0	0 0	0 0	0 0	0 0	0 0	0 0	0 0	0 0	0 0	0 0	0 0	0 0	0 0	0 0	0 0	0 0	0 0	0 0	0 0	0 0	0 0	0 0	0 0	11 0	6 18	0 4	1 0	3 0	5 0	3 0	2 0	3 0	3 0	2 0	4 0	10 0	2 0	2 0	1 0	2 0
tig00001299	1105080	A	C	0 0	0 0	0 0	0 0	0 0	0 0	0 0	0 0	0 0	0 0	0 0	0 0	0 0	0 0	0 0	0 0	0 0	0 0	0 0	0 0	0 0	0 0	0 0	0 0	0 0	0 0	0 0	0 0	0 0	0 9	19 4	5 0	0 1	0 3	0 5	0 3	0 2	0 3	0 3	0 1	0 4	0 8	0 2	0 2	0 1	0 1
tig00001299	1105083	C	T	0 0	0 0	0 0	0 0	0 0	0 0	0 0	0 0	0 0	0 0	0 0	0 0	0 0	0 0	0 0	0 0	0 0	0 0	0 0	0 0	0 0	0 0	0 0	0 0	0 0	0 0	0 0	0 0	0 0	2 6	4 18	0 5	0 1	0 2	0 5	0 3	0 2	0 3	0 2	0 1	0 4	0 6	0 2	0 2	0 1	0 1
tig00001299	1105103	A	T	0 0	0 0	0 0	0 0	0 0	0 0	0 0	0 0	0 0	0 0	0 0	0 0	0 0	0 0	0 0	0 0	0 0	0 0	0 0	0 0	0 0	0 0	0 0	0 0	0 0	0 0	0 0	0 0	0 0	0 7	13 1	4 0	0 1	0 1	0 4	0 3	0 0	0 0	0 2	0 1	0 3	0 6	0 1	0 0	0 1	0 1
tig00001299	1105128	G	A	0 0	0 0	0 0	0 0	0 0	0 0	0 0	0 0	0 0	0 0	0 0	0 0	0 0	0 0	0 0	0 0	0 0	0 0	0 0	0 0	0 0	0 0	0 0	0 0	0 0	0 0	0 0	0 0	0 0	0 6	0 11	0 4	0 0	0 0	0 4	0 3	0 0	0 0	0 1	0 0	0 2	0 7	0 1	0 0	0 1	0 0
tig00001299	1105134	A	G	0 0	0 0	0 0	0 0	0 0	0 0	0 0	0 0	0 0	0 0	0 0	0 0	0 0	0 0	0 0	0 0	0 0	0 0	0 0	0 0	0 0	0 0	0 0	0 0	0 0	0 0	0 0	0 0	0 0	0 6	0 10	0 3	0 0	0 0	4 0	3 0	0 0	0 0	1 0	0 0	2 0	6 0	1 0	0 0	1 0	0 0
tig00001299	1105180	A	G	0 0	0 0	0 0	0 0	0 0	0 0	0 0	0 0	0 0	0 0	0 0	0 0	0 0	0 0	0 0	0 0	0 0	0 0	0 0	0 0	0 0	0 0	0 0	0 0	0 0	0 0	0 0	0 0	0 0	18 0	12 0	4 0	0 0	0 0	0 0	0 0	0 0	0 0	0 0	0 0	0 0	0 0	0 0	0 0	0 0	0 0
tig00001299	1105188	A	G	0 0	0 0	0 0	0 0	0 0	0 0	0 0	0 0	0 0	0 0	0 0	0 0	0 0	0 0	0 0	0 0	0 0	0 0	0 0	0 0	0 0	0 0	0 0	0 0	0 0	0 0	0 0	0 0	0 0	3 20	17 0	7 0	0 0	0 0	0 0	0 0	0 0	0 0	0 0	0 0	0 0	0 0	0 0	0 0	0 0	0 0
tig00001299	1105193	G	GGTAC	0 0	0 0	0 0	0 0	0 0	0 0	0 0	0 0	0 0	0 0	0 0	0 0	0 0	0 0	0 0	0 0	0 0	0 0	0 0	0 0	0 0	0 0	0 0	0 0	0 0	0 0	0 0	0 0	0 0	0 27	0 22	0 6	0 0	0 0	0 0	0 0	0 0	0 0	0 0	0 0	0 0	0 0	0 0	0 0	0 0	0 0
tig00001299	1105208	ATAACC	A	0 0	0 0	0 0	0 0	0 0	0 0	0 0	0 0	0 0	0 0	0 0	0 0	0 0	0 0	0 0	0 0	0 0	0 0	0 0	0 0	0 0	0 0	0 0	0 0	0 0	0 0	0 0	0 0	0 0	0 28	0 14	0 3	0 0	0 0	0 0	0 0	0 0	0 0	0 0	0 1	0 0	0 0	0 0	0 1	0 0	0 0
tig00001299	1105212	C	T	0 0	0 0	0 0	0 0	0 0	0 0	0 0	0 0	0 0	0 0	0 0	0 0	0 0	0 0	0 0	0 0	0 0	0 0	0 0	0 0	0 0	0 0	0 0	0 0	0 0	0 0	0 0	0 0	0 0	6 28	11 14	3 3	0 0	0 0	0 0	0 0	0 0	0 0	0 0	0 1	0 0	0 0	0 0	0 1	0 0	0 0
tig00001299	1105280	G	T	0 0	0 0	0 0	0 0	0 0	0 0	0 0	0 0	0 0	0 0	0 0	0 0	0 0	0 0	0 0	0 0	0 0	0 0	0 0	0 0	0 0	0 0	0 0	0 0	0 0	0 0	0 0	0 0	0 0	27 0	13 22	3 3	0 0	0 0	1 0	4 0	0 0	2 0	0 0	2 0	2 0	0 0	0 0	2 0	0 0	0 0
tig00001299	1105311	T	A	0 13	0 7	0 10	0 7	0 9	0 17	0 5	0 9	0 7	0 4	0 10	0 3	0 8	0 11	0 1	0 3	0 0	0 2	0 4	0 7	0 13	0 6	0 6	0 5	0 5	0 2	0 4	0 3	0 7	0 19	0 30	0 7	0 0	0 0	0 1	0 6	0 1	0 2	0 1	0 4	0 2	0 0	0 1	0 4	0 1	0 0
tig00001299	1105314	CA	C	0 14	0 8	0 11	0 8	0 12	0 17	0 6	0 10	0 8	0 4	0 11	0 3	0 8	0 15	0 1	0 5	0 0	0 4	0 5	0 8	0 16	0 6	0 6	0 5	0 5	0 4	0 4	0 3	0 8	8 10	9 19	4 2	0 0	0 0	0 0	0 6	0 1	0 2	0 1	0 4	0 2	0 0	0 1	0 2	0 1	0 0
tig00001299	1105324	C	T	0 16	0 10	0 16	0 10	0 14	0 23	0 8	0 14	0 10	0 7	0 19	0 4	0 12	0 18	0 3	0 5	0 2	0 5	0 5	0 15	0 22	0 9	0 6	0 6	0 6	0 5	0 8	0 5	0 14	0 24	0 27	0 7	0 0	0 0	0 1	0 5	0 3	0 2	0 1	0 4	0 2	0 0	0 3	0 4	0 1	0 0
tig00001299	1105328	G	C	0 17	0 10	0 20	0 11	0 15	0 24	0 9	0 16	0 11	0 7	0 20	0 4	0 13	0 19	0 4	0 5	0 3	0 6	0 6	0 15	0 26	0 11	0 8	0 7	0 6	0 5	0 8	0 8	0 18	0 21	0 29	0 7	0 0	0 1	0 0	0 6	0 3	0 2	0 1	0 4	0 2	0 0	0 3	0 4	0 1	0 0
tig00001299	1105341	A	C	12 8	11 0	22 0	4 9	17 0	33 0	10 0	11 6	4 9	9 0	21 0	3 5	16 0	19 0	4 0	10 0	4 0	3 3	8 0	8 10	32 0	6 10	9 0	11 0	8 0	5 3	11 0	6 5	15 4	0 19	0 34	0 8	0 0	0 1	0 1	0 9	0 3	0 5	0 0	0 5	0 2	0 0	0 3	0 11	0 1	0 0
tig00001299	1105348	C	G	0 22	0 13	0 24	0 13	0 18	0 34	0 11	0 20	0 14	0 10	0 23	0 11	0 19	0 24	0 4	0 10	2 3	0 8	4 5	8 11	0 34	0 17	10 0	15 0	10 0	2 6	6 5	7 6	0 19	0 20	0 34	0 8	0 0	0 1	0 3	0 9	0 3	0 5	0 1	0 5	0 2	0 0	0 3	0 12	0 1	0 0
tig00001299	1105355	G	A	0 29	0 13	0 24	0 13	0 19	0 37	0 14	0 24	0 15	0 11	0 28	0 12	0 19	0 25	0 4	0 10	0 5	0 10	0 10	0 19	0 36	0 18	0 11	0 15	0 12	0 10	0 11	0 13	0 21	0 20	0 34	0 8	0 0	0 1	0 2	0 10	0 3	0 5	0 4	0 4	0 2	0 0	0 3	0 11	0 2	0 0
tig00001299	1105376	C	T	0 34	0 16	0 33	0 14	0 24	0 38	0 21	0 32	0 21	0 18	0 34	0 20	0 21	0 28	0 5	0 10	0 8	0 16	0 13	0 24	0 46	0 24	0 13	0 19	0 17	0 10	0 13	0 15	0 23	16 12	21 11	5 3	0 0	0 1	0 4	0 9	0 4	0 6	0 4	0 4	0 4	0 0	0 4	0 11	0 3	0 0
tig00001299	1105377	AC	GG	0 33	0 16	0 32	0 13	0 24	0 39	0 20	0 32	0 21	0 18	0 35	0 20	0 21	0 28	0 5	0 10	0 8	0 16	0 13	0 24	0 45	0 24	0 13	0 19	0 17	0 10	0 13	0 15	0 24	0 28	0 31	0 8	0 0	0 1	0 4	0 10	0 4	0 6	0 4	0 4	0 4	0 0	0 4	0 11	0 3	0 0
tig00001299	1105378	C	G	0 33	0 16	0 32	0 13	0 24	0 39	0 20	0 32	0 21	0 18	0 35	0 20	0 21	0 28	0 5	0 10	0 8	0 16	0 13	0 24	0 45	0 24	0 13	0 19	0 17	0 10	0 13	0 15	0 24	0 28	0 31	0 8	0 0	0 1	0 4	0 10	0 4	0 6	0 4	0 4	0 4	0 0	0 4	0 11	0 3	0 0
tig00001299	1105383	C	A	0 33	0 20	0 35	0 13	0 25	0 39	0 22	0 33	0 23	0 19	0 37	0 21	0 24	0 26	0 5	0 10	0 10	0 17	0 15	0 25	0 48	0 26	0 16	0 22	0 18	0 11	0 14	0 16	4 21	0 33	0 30	0 8	0 0	1 0	4 0	8 0	4 0	6 0	7 0	3 0	4 0	0 0	4 0	10 0	3 0	0 0
tig00001299	1105383	C	CATG	0 33	0 20	0 35	0 13	0 25	0 39	0 22	0 33	0 23	0 19	0 37	0 21	0 24	0 26	0 5	0 10	0 10	0 17	0 15	0 25	0 48	0 26	0 16	0 22	0 18	0 11	0 14	0 16	0 21	0 33	0 30	0 8	0 0	0 0	0 0	0 0	0 0	0 0	0 0	0 0	0 0	0 0	0 0	0 0	0 0	0 0
tig00001299	1105389	T	C	0 33	0 20	0 38	0 15	0 25	0 38	0 21	0 35	0 24	0 19	0 36	0 21	0 28	0 30	0 5	0 13	0 10	0 16	0 14	0 25	0 53	0 27	0 19	0 24	0 18	0 13	0 15	0 16	0 28	0 39	0 31	0 8	0 0	0 1	1 4	0 9	2 4	0 6	0 7	0 4	0 4	0 0	0 4	7 4	0 3	0 0
tig00001299	1105392	A	G	0 31	0 18	0 40	0 15	0 25	0 34	0 20	0 35	0 23	0 19	0 36	0 21	0 28	0 29	0 5	0 15	0 11	0 17	0 13	0 24	0 51	0 25	0 18	0 25	0 18	0 12	0 13	0 16	0 29	0 38	0 30	0 8	0 0	0 1	0 4	0 11	0 6	0 6	0 7	0 2	0 4	0 0	0 4	0 11	0 3	0 0
tig00001299	1105396	C	T	0 31	0 21	0 42	0 13	0 23	0 33	0 20	0 33	0 22	0 20	0 37	0 22	0 26	0 27	0 6	0 15	0 11	0 15	0 13	0 23	0 50	0 27	0 18	0 23	0 17	0 14	0 15	0 16	1 27	23 13	21 9	5 3	0 0	0 0	0 4	0 9	0 6	0 5	0 5	0 3	0 4	0 0	0 4	0 11	0 3	0 0
tig00001299	1105398	A	C	0 31	0 21	0 40	0 13	0 24	0 31	0 20	0 34	0 22	0 20	0 39	0 22	0 25	0 27	0 7	0 16	0 11	0 16	0 13	0 23	0 52	0 27	0 19	0 24	0 16	0 15	0 15	0 15	0 27	0 36	0 31	0 7	0 0	0 1	0 5	0 11	0 4	0 6	0 7	0 4	0 4	0 0	0 4	0 9	0 3	0 0
tig00001299	1105399	T	C	0 30	0 22	0 41	0 13	0 24	0 31	0 20	0 34	0 21	0 21	0 39	0 22	0 24	0 27	0 7	0 16	0 11	0 16	0 13	0 23	0 52	12 14	0 19	0 24	0 17	0 15	0 15	0 15	0 27	0 36	0 30	0 8	0 0	0 1	0 5	0 11	0 5	0 6	0 7	0 4	0 4	0 0	0 4	0 11	0 3	0 0
tig00001299	1105416	TTTCAATG	ATTTAATT	0 30	0 19	0 39	0 8	0 18	0 30	0 22	0 37	0 21	0 18	0 33	0 22	0 25	0 27	0 5	0 14	0 13	0 16	0 10	0 11	0 44	0 25	0 17	0 22	0 13	0 12	0 8	0 11	0 19	0 31	0 30	0 8	0 0	0 1	0 5	0 8	0 5	0 4	0 7	0 4	0 2	0 0	0 4	0 11	0 3	0 0
tig00001299	1105430	GA	G	0 27	0 23	0 38	0 7	0 17	0 22	0 24	0 39	0 23	0 22	0 37	0 23	0 27	0 32	0 6	0 12	0 17	0 18	0 9	0 14	0 41	0 21	0 16	0 20	0 16	0 13	0 7	0 9	2 14	0 11	0 13	0 3	0 0	1 0	5 0	4 0	4 0	4 0	6 0	2 0	2 0	0 0	3 0	9 0	3 0	0 0
tig00001299	1105435	T	G	0 27	0 23	0 38	0 7	0 17	0 22	0 24	0 39	0 23	0 22	0 37	0 23	0 27	0 32	0 6	0 12	0 17	0 18	0 9	0 14	0 41	0 21	0 16	0 20	0 16	0 13	0 7	0 9	0 14	22 11	14 13	5 3	0 0	0 0	0 0	0 0	0 0	0 0	0 0	0 0	0 0	0 0	0 0	0 0	0 0	0 0
tig00001299	1105447	T	C	0 27	0 21	0 35	0 6	0 16	0 20	0 23	0 36	0 22	0 20	0 36	0 18	0 24	0 27	0 6	0 11	0 14	0 16	0 7	0 10	0 37	0 17	0 15	0 16	0 12	0 11	0 7	0 6	0 17	0 30	0 29	0 7	0 0	0 2	0 5	0 6	0 4	0 4	0 6	0 1	0 2	0 0	0 3	0 10	0 3	0 0
tig00001299	1105461	T	G	0 19	0 20	0 30	0 6	0 15	0 16	0 17	0 29	0 18	0 16	0 27	0 14	0 22	0 24	0 5	0 10	0 14	0 11	0 5	0 8	0 32	0 15	0 11	0 14	0 9	0 10	0 6	0 5	0 16	0 29	0 24	0 8	0 0	0 2	0 5	0 5	0 4	0 4	0 6	0 1	0 3	0 0	0 3	0 8	0 2	0 0
tig00001299	1105468	G	A	0 18	0 17	0 27	0 5	0 11	0 16	0 15	0 26	0 15	0 15	0 25	0 12	0 21	0 21	0 5	0 9	0 12	0 11	0 4	0 7	0 30	0 12	0 11	0 12	0 6	0 10	0 5	0 5	0 14	0 24	0 24	0 8	0 0	0 2	0 5	0 5	0 2	0 4	0 6	0 1	0 3	0 0	0 2	0 8	0 2	0 0
tig00001299	1105473	C	A	0 16	0 17	0 27	0 5	0 10	0 16	0 13	0 24	0 13	0 12	0 24	0 9	0 21	0 20	0 5	0 9	0 11	0 11	0 3	0 5	0 28	0 11	0 11	0 12	0 6	0 10	0 4	0 4	0 13	0 22	0 23	0 8	0 0	0 2	0 5	0 5	0 2	0 4	0 6	0 1	0 2	0 0	0 1	0 7	0 2	0 0
tig00001299	1105482	T	G	0 14	0 15	0 24	0 5	0 8	0 14	0 13	0 21	0 11	0 11	0 22	0 7	0 15	0 16	0 5	0 7	0 10	0 8	0 2	0 4	0 22	0 9	0 7	0 8	0 4	0 9	0 4	0 3	0 9	0 19	0 22	0 8	0 0	0 0	0 4	0 2	0 2	0 2	0 6	0 1	0 3	0 0	0 1	0 7	0 2	0 0
tig00001299	1105496	A	G	0 10	0 11	0 13	0 1	0 6	0 11	0 10	0 15	0 6	0 9	0 17	0 4	0 12	0 10	0 3	0 4	0 8	0 7	0 2	0 4	0 13	0 6	0 4	0 4	0 4	0 5	0 1	0 3	0 6	0 16	0 19	0 7	0 0	0 1	0 4	0 1	0 2	0 1	0 5	0 0	0 3	0 0	0 1	0 0	0 2	0 0
tig00001299	1105501	CAA	TAC	0 8	0 8	0 11	0 1	0 4	0 5	0 8	0 13	0 6	0 7	0 13	0 4	0 11	0 9	0 2	0 2	0 7	0 6	0 2	0 4	0 10	0 7	0 3	0 3	0 4	0 3	0 1	0 3	0 5	0 16	0 22	0 8	0 0	0 0	0 2	0 1	0 2	0 1	0 6	0 0	0 2	0 0	0 1	0 0	0 1	0 0
tig00001299	1105514	T	C	0 1	0 0	0 0	0 0	0 0	0 1	0 0	0 2	0 0	0 0	0 1	0 1	0 2	0 0	0 0	0 0	0 0	0 2	0 0	0 0	0 1	0 3	0 0	0 0	0 0	0 0	0 0	0 0	0 0	7 9	0 6	3 1	0 0	0 0	0 0	0 1	0 1	0 0	0 3	0 0	0 2	0 0	0 1	0 0	0 1	0 0
tig00001299	1105519	A	G	3 0	0 0	2 0	0 0	0 0	2 0	0 0	2 0	0 0	0 0	1 0	2 0	2 0	0 0	0 0	0 0	0 0	2 0	0 0	0 0	1 0	3 0	0 0	0 0	0 0	0 0	0 0	0 0	0 0	15 0	6 0	4 0	0 0	0 0	0 0	1 0	1 0	0 0	3 0	0 0	0 0	0 0	0 0	0 0	1 0	0 0
tig00001299	1105528	G	C	0 10	0 2	0 6	0 0	0 0	0 3	0 1	0 4	0 1	0 1	0 3	0 3	0 5	0 2	0 0	0 0	0 1	0 2	0 2	0 1	0 1	0 4	0 0	0 0	0 1	0 0	0 0	0 0	0 0	0 21	0 7	0 5	0 0	0 0	0 0	0 1	0 1	0 0	0 3	0 0	0 0	0 0	0 0	0 0	0 0	0 0
tig00001299	1105530	GA	G	0 10	0 2	0 6	0 0	0 0	0 3	0 1	0 4	0 1	0 1	0 3	0 3	0 7	0 2	0 0	0 0	0 1	0 2	0 2	0 1	0 1	0 4	0 0	0 0	0 2	0 0	0 0	0 0	0 0	0 19	0 5	0 5	0 0	0 0	0 0	0 0	0 0	0 0	0 0	0 0	0 0	0 0	0 0	0 0	0 0	0 0
tig00001299	1105561	T	C	0 22	0 14	0 15	0 3	0 6	0 17	0 11	0 11	0 10	0 8	0 9	0 13	0 15	0 12	0 2	0 5	0 2	0 9	0 11	0 3	0 12	0 15	0 2	0 6	0 7	0 0	0 1	0 6	0 3	0 31	6 8	0 8	0 0	0 2	0 0	0 1	0 0	0 0	0 0	0 0	0 0	0 0	0 0	0 0	0 0	0 0
tig00001299	1105571	ATTTTCTAGT	A	0 24	0 11	0 11	0 3	0 6	0 22	0 13	0 14	0 11	0 11	0 15	0 14	0 18	0 12	0 2	0 5	0 2	0 11	0 11	0 4	0 14	0 14	0 3	0 7	0 7	0 0	0 1	0 5	0 3	8 18	10 0	7 0	0 0	0 1	0 0	0 2	0 0	0 0	0 0	0 0	0 0	0 0	0 0	0 0	0 3	0 0
tig00001299	1105573	T	A	0 24	0 11	5 11	0 3	0 6	0 22	0 13	0 14	0 11	0 11	0 15	0 14	0 18	0 12	0 2	0 5	0 2	0 11	0 11	0 4	0 14	0 14	0 3	0 7	0 7	0 0	0 1	0 5	0 3	0 18	0 0	0 0	0 0	0 1	0 0	0 2	0 0	0 0	0 0	0 0	0 0	0 0	0 0	0 0	0 3	0 0
tig00001299	1105574	TTCTAG	CTCTAT	0 24	0 11	0 11	0 3	0 6	0 22	0 13	0 14	0 11	0 11	0 15	0 14	0 18	0 12	0 2	0 5	0 2	0 11	0 11	0 4	0 14	0 14	0 3	0 7	0 7	0 0	0 1	0 5	0 3	0 18	0 0	0 0	0 0	0 1	0 0	0 2	0 0	0 0	0 0	0 0	0 0	0 0	0 0	0 0	0 3	0 0
tig00001299	1105579	G	TT	0 24	0 11	0 11	0 3	0 6	0 22	0 13	0 14	0 11	0 11	0 15	0 14	0 18	0 12	0 2	0 5	0 2	0 11	0 11	0 4	0 14	0 14	0 3	0 7	0 7	0 0	0 1	0 5	0 3	0 18	0 0	0 0	0 0	0 1	0 0	0 2	0 0	0 0	0 0	0 0	0 0	0 0	0 0	0 0	0 3	0 0
tig00001299	1105595	A	T	0 29	0 14	0 30	0 3	0 10	0 32	0 19	0 25	0 19	0 25	0 32	0 21	0 23	0 20	0 3	0 8	0 5	0 14	0 15	0 5	0 25	0 28	0 3	0 10	0 10	0 1	0 3	0 12	0 5	0 36	0 22	0 8	0 0	0 0	0 0	2 0	0 0	0 0	0 0	0 0	0 0	0 0	0 0	0 0	3 0	0 0
tig00001299	1105595	ATA	TTT	0 29	0 14	0 30	0 3	0 10	0 32	0 19	0 25	0 19	0 25	0 32	0 21	0 23	0 20	0 3	0 8	0 5	0 14	0 15	0 5	0 25	0 28	0 3	0 10	0 10	0 1	0 3	0 12	0 5	0 36	0 22	0 8	0 0	0 0	0 0	0 0	0 0	0 0	0 0	0 0	0 0	0 0	0 0	0 0	0 0	0 0
tig00001299	1105600	T	A	0 28	0 19	0 32	0 5	0 9	0 33	0 20	0 25	0 20	0 26	0 34	0 21	0 23	0 23	0 3	0 8	0 6	0 15	0 15	0 6	0 26	0 30	0 5	0 11	0 9	0 1	0 3	0 12	0 5	0 39	0 25	8 0	0 0	0 2	0 0	0 3	0 0	0 0	0 0	0 1	0 0	0 2	0 0	0 0	0 4	0 0
tig00001299	1105601	A	C	0 28	0 19	0 32	0 5	0 8	0 33	0 20	0 25	0 20	0 26	0 36	0 21	0 22	0 23	0 3	0 8	0 6	0 16	0 15	0 6	0 26	0 30	0 5	0 11	0 9	0 1	0 3	0 12	0 5	0 40	0 25	0 8	0 0	2 0	0 0	0 3	0 0	0 0	0 0	1 0	0 0	2 0	0 0	0 0	4 0	0 0
tig00001299	1105608	T	G	0 27	0 18	0 34	0 5	0 9	0 36	0 22	0 27	0 23	0 29	0 39	0 22	0 23	0 28	0 3	0 8	0 6	0 16	0 15	0 8	0 31	0 30	0 5	0 11	0 9	0 2	0 4	0 12	0 5	0 38	0 30	0 8	0 0	0 2	0 0	0 3	0 0	0 0	0 0	0 1	0 0	0 2	0 0	0 0	0 4	0 0
tig00001299	1105609	G	T	0 26	0 19	0 36	0 5	0 9	0 36	0 23	0 26	0 21	0 29	0 39	0 22	0 23	0 28	0 3	0 8	0 6	0 16	0 15	0 8	0 32	0 30	0 5	0 11	0 9	0 2	0 4	0 12	0 5	0 38	0 31	0 8	0 0	2 0	0 0	0 3	0 0	0 0	0 0	1 0	0 0	2 0	0 0	0 0	4 0	0 0
tig00001299	1105610	T	C	0 28	0 18	0 35	0 5	0 9	0 37	0 24	0 27	0 22	0 29	0 41	0 21	0 22	0 29	0 3	0 8	0 6	0 16	0 15	0 8	0 34	0 31	0 5	0 11	0 9	0 2	0 4	0 12	0 5	0 37	0 32	0 8	0 0	0 2	0 0	0 3	0 0	0 0	0 0	0 1	0 0	0 2	0 0	0 0	0 4	0 0
tig00001299	1105620	C	A	0 25	0 19	0 35	0 6	0 12	0 40	0 26	0 28	0 22	0 31	0 43	0 21	0 20	0 27	0 3	0 11	0 5	0 18	0 17	0 8	0 37	0 32	0 5	0 12	0 9	0 4	0 6	0 14	0 6	0 37	0 32	0 6	0 0	0 2	0 1	0 4	0 0	0 0	0 0	0 2	0 0	0 2	0 0	0 0	0 4	0 1
tig00001299	1105639	T	C	0 21	0 18	0 31	0 6	0 11	0 33	0 27	0 27	0 19	0 29	1 40	0 21	0 17	0 23	0 3	0 10	0 5	0 18	0 14	0 8	0 36	0 31	0 5	0 10	0 9	0 4	0 6	0 12	0 5	0 41	0 32	0 5	0 0	0 3	0 1	0 5	0 0	0 0	0 1	0 3	0 0	0 3	0 0	0 0	0 5	0 2
tig00001299	1105644	C	T	10 0	9 0	12 0	3 0	5 0	10 0	13 0	12 0	9 0	18 0	23 0	5 0	5 0	15 0	0 0	4 0	3 0	5 0	5 0	5 0	20 0	18 0	3 0	2 0	2 0	3 0	1 0	4 0	3 0	17 16	28 0	5 0	0 0	0 0	1 0	0 0	1 0	0 0	1 0	2 0	2 0	3 0	0 0	0 0	5 0	2 0
tig00001299	1105644	CAAG	TAAA	0 0	0 0	0 0	0 0	0 0	0 0	0 0	0 0	0 0	0 0	0 0	0 0	0 0	0 0	0 0	0 0	0 0	0 0	0 0	0 0	0 0	0 0	0 0	0 0	0 0	0 0	0 0	0 0	0 0	0 16	0 0	0 0	0 0	0 0	0 0	0 0	0 0	0 0	0 0	0 0	0 0	0 0	0 0	0 0	0 0	0 0
tig00001299	1105644	CAAGA	TAAGT	0 0	0 0	0 0	0 0	0 0	0 0	0 0	0 0	0 0	0 0	0 0	0 0	0 0	0 0	0 0	0 0	0 0	0 0	0 0	0 0	0 0	0 0	0 0	0 0	0 0	0 0	0 0	0 0	0 0	0 16	0 0	0 0	0 0	0 0	0 0	5 0	0 0	0 0	0 0	0 0	0 0	0 0	0 0	0 0	0 0	0 0
tig00001299	1105644	CAAG	TTAAA	0 0	0 0	0 0	0 0	0 0	0 0	0 0	0 0	0 0	0 0	0 0	0 0	0 0	0 0	0 0	0 0	0 0	0 0	0 0	0 0	0 0	0 0	0 0	0 0	0 0	0 0	0 0	0 0	0 0	0 16	0 0	0 0	0 0	0 0	0 0	0 0	0 0	0 0	0 0	0 0	0 0	0 0	0 0	0 0	0 0	0 0
tig00001299	1105658	G	A	19 0	16 0	37 0	6 0	14 0	32 0	28 0	29 0	21 0	28 0	41 0	17 0	18 0	23 0	2 0	11 0	7 0	11 0	12 0	7 0	38 0	16 16	5 0	13 0	6 0	7 0	7 0	16 0	7 0	15 18	0 29	0 5	0 0	0 3	0 2	0 7	0 1	0 0	0 1	0 3	0 2	0 6	0 2	0 0	0 7	0 2
tig00001299	1105659	A	T	0 19	0 17	0 37	0 5	0 14	0 31	0 29	0 29	0 19	0 28	0 41	0 17	0 18	0 23	0 2	0 11	0 8	0 11	0 12	0 7	0 36	0 33	0 4	0 13	0 6	0 7	0 7	0 16	0 6	0 33	0 29	0 5	0 0	0 3	0 2	0 7	0 1	0 0	0 1	0 3	0 2	0 6	0 2	0 0	0 7	0 2
tig00001299	1105673	A	C	0 19	0 23	0 35	0 6	0 17	0 29	0 27	0 32	0 23	0 27	0 37	0 16	0 25	0 28	0 3	0 11	0 9	0 9	0 12	0 8	0 38	0 35	0 7	0 12	0 6	0 8	0 10	0 15	0 9	0 35	0 28	0 5	0 0	0 1	0 2	0 7	0 1	0 0	0 1	0 3	0 2	0 6	0 2	0 0	0 7	0 2
tig00001299	1105675	GTA	ATT	0 19	0 24	0 33	0 7	0 17	0 26	0 27	0 32	0 22	0 26	0 37	0 15	0 24	0 27	0 3	0 11	0 8	0 8	0 12	0 8	0 36	0 33	0 7	0 11	0 6	0 8	0 9	0 13	0 10	0 34	0 28	0 5	0 0	0 3	0 2	0 7	0 1	0 0	0 1	0 4	0 2	0 6	0 2	0 0	0 7	0 3
tig00001299	1105678	TTA	T	0 17	0 24	0 32	0 7	0 16	0 24	0 28	0 29	0 22	0 24	0 34	0 14	0 24	0 26	0 2	0 11	0 8	0 9	0 11	0 8	0 35	0 31	0 7	0 12	0 9	0 7	0 9	0 13	0 10	0 33	0 28	0 6	0 0	3 0	2 0	1 7	1 0	0 0	1 0	3 0	2 0	6 0	2 0	0 0	7 0	3 0
tig00001299	1105681	T	A	0 17	0 24	0 32	0 7	0 16	0 24	0 28	0 29	0 22	0 24	0 34	0 14	0 24	0 26	0 2	0 11	0 8	0 9	0 11	0 8	0 35	0 31	0 7	0 12	0 9	0 7	0 9	0 13	0 10	0 33	0 28	0 6	0 0	0 0	0 0	0 7	0 0	0 0	0 0	0 0	0 0	0 0	0 0	0 0	0 0	0 0
tig00001299	1105685	C	G	0 15	0 23	0 27	0 7	0 16	0 23	0 25	0 29	0 18	0 22	0 32	0 13	0 23	0 25	0 2	0 11	0 7	0 8	0 11	0 7	0 34	0 28	0 7	0 9	0 9	0 7	0 9	0 13	0 10	0 36	0 28	0 5	0 1	0 5	0 4	0 11	0 3	0 0	0 1	0 3	0 3	0 8	0 4	0 0	0 7	0 4
tig00001299	1105692	TTT	CTC	0 13	0 20	0 26	0 7	0 15	0 22	0 22	0 24	0 16	0 16	0 25	0 12	0 20	0 20	0 2	0 8	0 7	0 7	0 9	0 7	0 32	0 24	0 7	0 10	0 7	0 7	0 8	0 10	0 9	0 32	0 25	0 6	0 2	0 5	0 5	0 13	0 3	0 0	0 2	0 3	0 5	0 8	0 4	0 0	0 9	0 5
tig00001299	1105696	C	T	0 13	0 19	0 26	0 5	0 14	0 22	0 22	0 24	0 17	0 16	0 25	0 12	0 20	0 20	0 2	0 8	0 6	0 5	0 9	0 6	0 29	0 24	0 6	0 10	0 7	0 7	0 8	0 10	0 9	0 34	7 17	2 4	0 2	0 3	0 5	0 15	0 3	0 0	0 2	0 2	0 5	0 9	0 4	0 0	0 8	0 5
tig00001299	1105701	TA	T	0 10	0 14	0 22	0 5	0 14	0 17	0 18	0 21	0 12	0 12	0 16	0 10	0 18	0 15	0 2	0 8	0 5	0 4	0 8	0 5	0 20	0 19	0 5	0 8	0 7	0 6	0 7	0 9	0 9	0 35	0 26	0 10	0 3	0 4	0 8	0 18	0 3	0 1	0 3	0 3	0 5	0 9	0 4	0 0	0 11	0 5
tig00001299	1105708	C	T	0 10	0 15	0 21	0 5	0 14	0 15	0 18	0 19	0 12	0 11	0 16	0 10	0 18	0 15	0 2	0 8	0 5	0 4	0 7	0 4	0 20	0 19	0 5	0 8	0 7	0 6	0 7	0 9	0 9	0 34	9 18	0 11	0 3	0 5	0 8	0 18	0 4	0 2	0 2	0 3	0 6	0 10	0 4	0 0	0 11	0 5
tig00001299	1105716	T	C	6 0	15 0	17 0	4 0	11 0	13 0	15 0	17 0	10 0	9 0	12 0	9 0	18 0	13 0	1 0	7 0	5 0	2 0	6 0	3 0	15 0	17 0	5 0	7 0	7 0	5 0	6 0	6 0	8 1	29 0	28 0	10 0	3 0	5 0	9 0	20 0	3 0	2 0	3 0	6 0	9 0	11 0	5 0	0 0	9 0	5 0
tig00001299	1105733	CG	C	0 10	0 18	0 20	0 8	0 16	0 22	0 19	0 21	0 11	0 15	0 21	0 14	0 19	0 12	0 3	0 6	0 7	0 5	0 7	0 5	0 22	0 25	0 7	0 9	0 8	0 5	0 10	0 7	0 9	18 14	0 35	0 11	0 6	0 7	0 14	0 19	0 4	0 3	0 6	0 6	0 16	0 12	0 6	0 0	0 14	0 5
tig00001299	1105740	C	G	0 12	0 17	0 21	0 11	0 18	0 21	0 21	0 24	0 13	0 20	0 26	0 15	0 22	0 16	0 3	0 7	0 7	0 6	0 8	0 8	0 25	0 28	0 7	0 11	0 8	0 7	0 12	0 7	0 9	0 34	0 37	0 12	0 7	0 10	0 16	0 19	0 3	0 3	0 7	0 7	0 17	0 12	0 6	0 0	0 14	0 7
tig00001299	1105761	G	A	0 15	0 17	0 21	0 12	0 21	0 27	0 16	0 24	0 13	0 21	0 33	0 19	0 22	0 16	0 4	0 6	0 7	0 9	0 4	0 11	0 33	0 24	0 11	0 10	0 9	0 5	0 11	0 4	0 7	0 31	0 35	0 12	0 8	0 15	0 19	0 20	0 7	0 3	0 10	0 10	0 30	0 13	0 7	0 2	0 16	0 10
tig00001299	1105764	A	C	0 15	0 17	0 22	0 12	0 19	0 28	0 18	0 26	0 11	0 20	0 33	0 19	0 21	0 15	0 4	0 6	0 8	0 7	0 3	0 11	0 33	20 5	0 11	0 10	0 8	0 5	0 11	0 5	0 7	0 28	0 37	0 15	0 8	0 15	0 19	0 20	0 7	0 3	0 10	0 11	0 30	0 13	0 7	0 2	0 17	0 10
tig00001299	1105788	T	A	0 19	0 16	0 20	0 12	0 19	0 27	0 16	0 21	0 10	0 20	0 39	0 19	0 16	0 23	0 4	0 7	0 8	0 8	0 2	0 12	0 30	0 22	0 8	0 8	0 4	0 5	0 9	0 4	0 5	0 26	0 33	0 14	0 9	0 21	0 19	0 8	0 10	0 3	0 7	0 16	0 34	0 13	0 9	0 5	0 23	0 13
tig00001299	1105788	T	C	0 19	0 16	0 20	0 12	0 19	0 27	0 16	0 21	0 10	0 20	0 39	0 19	0 16	0 23	0 4	0 7	0 8	0 8	0 2	0 12	0 30	0 22	0 8	0 8	0 4	0 5	0 9	0 4	0 5	0 26	0 33	0 14	0 9	0 21	0 19	17 8	0 10	0 3	0 7	0 16	0 34	0 13	0 9	0 5	0 23	0 13
tig00001299	1105793	G	A	0 19	0 16	0 19	0 12	0 18	0 27	0 16	0 22	0 10	0 20	0 37	0 18	0 16	0 24	0 4	0 7	0 7	0 8	0 2	0 12	0 31	0 23	0 8	0 8	0 4	0 5	0 9	0 4	0 5	0 27	0 35	0 12	0 13	0 20	0 25	0 25	0 14	0 5	0 10	0 21	0 39	0 14	0 9	0 5	0 25	0 14
tig00001299	1105796	T	A	2 0	1 0	3 0	2 0	2 0	6 0	3 0	4 0	2 0	5 0	7 0	3 0	4 0	5 0	0 0	1 0	0 0	2 0	1 0	3 0	5 0	5 0	1 0	3 0	0 0	2 0	3 0	0 0	1 0	14 13	16 19	11 3	15 0	21 0	26 0	6 0	14 0	3 0	10 0	20 0	34 0	14 0	7 0	4 0	27 0	14 0
tig00001299	1105796	TTT	ATG	0 0	0 0	0 0	0 0	0 0	0 0	0 0	0 0	0 0	0 0	0 0	0 0	0 0	0 0	0 0	0 0	0 0	0 0	0 0	0 0	0 0	0 0	0 0	0 0	0 0	0 0	0 0	0 0	0 0	0 13	0 19	0 3	0 0	0 0	0 0	17 0	0 0	0 0	0 0	0 0	0 0	0 0	0 0	0 0	0 0	0 0
tig00001299	1105809	A	T	0 23	0 19	0 22	0 13	0 21	0 34	0 18	0 29	0 13	0 23	0 39	0 20	0 19	0 30	0 4	0 8	0 11	0 9	0 3	0 12	0 40	0 23	0 12	0 9	0 5	0 5	0 10	0 5	0 6	15 11	20 17	11 3	19 0	24 0	27 0	14 19	15 0	6 0	15 0	25 0	43 0	18 0	9 0	8 0	27 0	16 0
tig00001299	1105814	C	T	0 24	0 21	0 23	0 14	0 22	0 34	0 18	0 29	0 14	0 25	0 41	0 21	0 19	0 30	0 4	0 8	0 11	0 9	0 3	0 12	0 40	0 24	0 12	0 9	0 5	0 5	0 10	0 5	0 6	0 25	0 33	0 15	0 19	0 24	0 28	0 34	0 17	0 6	0 15	0 25	0 42	0 18	0 9	0 9	0 28	0 18
tig00001299	1105820	G	A	0 26	0 23	0 24	0 15	0 20	0 34	0 16	0 32	0 14	0 25	0 43	0 23	0 21	0 32	0 3	0 9	0 12	0 8	0 3	0 13	0 43	0 22	0 15	0 10	0 5	0 5	0 11	0 7	0 6	10 13	0 32	0 14	0 19	0 27	0 29	0 32	0 17	0 7	0 17	0 28	0 46	0 18	0 11	0 10	0 30	0 22
tig00001299	1105846	C	A	0 31	0 28	0 29	0 8	0 23	0 37	0 19	0 36	0 18	0 22	0 45	0 19	0 23	0 31	0 2	0 7	0 13	0 11	0 3	0 11	0 43	0 21	0 12	0 11	0 10	0 5	0 10	0 10	0 10	0 22	0 33	0 17	0 26	0 32	0 27	0 26	0 22	0 13	0 25	0 31	0 61	0 28	0 10	0 14	0 38	0 20
tig00001299	1105848	TAC	CAA	0 28	0 27	0 25	0 9	0 21	0 37	0 19	0 35	0 20	0 20	0 45	0 19	0 20	0 25	0 2	0 5	0 13	0 11	0 3	0 10	0 42	0 23	0 11	0 10	0 9	0 5	0 10	0 10	0 9	0 21	0 31	0 17	0 26	0 36	0 24	0 28	0 22	0 14	0 25	0 31	0 61	0 28	0 11	0 14	0 36	0 20
tig00001299	1105860	G	T	0 30	0 29	0 27	0 7	0 19	0 37	0 23	0 38	0 23	0 24	0 40	0 18	0 23	0 29	0 3	0 8	0 12	0 12	0 7	0 6	0 45	0 24	0 14	0 13	0 9	0 6	0 11	0 11	0 13	0 26	0 32	0 15	0 33	0 39	0 26	0 29	0 26	0 17	0 29	0 36	0 66	0 31	0 13	0 15	0 43	0 25
tig00001299	1105862	C	G	0 29	0 30	0 25	0 7	0 19	0 37	0 22	0 37	0 23	0 27	0 42	0 17	0 24	0 30	0 3	0 8	0 11	0 12	0 7	0 6	0 46	0 24	0 13	0 12	0 10	0 5	0 10	0 11	0 13	0 27	0 31	0 16	0 34	0 41	0 26	0 29	0 27	0 17	0 30	0 36	0 65	0 31	0 14	0 16	0 43	0 26
tig00001299	1105870	T	G	22 0	18 0	24 0	3 0	14 0	29 0	21 0	28 0	21 0	24 0	30 0	17 0	21 0	21 0	3 0	7 0	7 0	15 0	7 0	6 0	41 0	31 0	13 0	10 0	10 0	6 0	12 0	13 0	6 0	29 0	33 0	16 0	36 0	42 0	24 0	29 0	26 0	19 0	29 0	35 0	61 0	30 0	13 0	18 0	46 0	27 0
tig00001299	1105878	A	G	0 29	0 28	1 32	0 6	0 20	0 40	0 29	0 40	0 29	0 32	0 41	0 24	0 26	0 27	0 3	0 9	0 13	0 18	0 10	0 6	0 50	0 37	0 17	0 15	0 12	0 9	0 12	0 15	0 20	0 30	0 32	0 16	0 37	1 43	1 21	0 32	0 27	0 22	0 34	0 35	0 56	0 32	0 13	0 20	20 28	8 22
tig00001299	1105879	G	A	0 29	0 28	0 33	0 7	0 21	0 42	0 29	0 39	0 29	0 35	0 41	0 25	0 28	0 28	0 3	0 10	0 14	0 18	0 10	0 6	0 50	0 38	0 17	0 13	0 12	0 9	0 13	0 16	0 21	0 32	0 33	0 16	0 37	0 44	0 22	0 32	0 26	0 22	0 35	0 36	0 56	0 32	0 13	0 22	0 48	0 30
tig00001299	1105920	A	G	0 46	0 40	0 49	0 10	0 38	0 51	0 44	0 44	0 34	0 42	0 67	0 39	0 37	0 36	0 6	0 14	0 14	0 22	0 17	0 18	0 53	0 54	0 19	0 17	0 16	0 17	0 20	0 21	0 33	0 37	0 35	0 18	0 43	0 46	0 27	0 36	0 32	0 27	0 41	0 30	0 53	0 40	0 14	0 25	0 60	0 36
tig00001299	1105935	A	ATAT	37 0	36 0	45 0	11 0	35 0	46 0	34 0	35 0	25 0	34 0	61 0	35 0	27 0	28 0	7 0	14 0	13 0	18 0	17 0	13 0	43 0	48 0	21 0	13 0	8 0	20 0	19 0	15 0	12 19	0 38	0 27	0 15	0 44	0 46	0 28	0 39	0 34	0 33	0 46	0 31	0 55	0 47	0 22	0 25	0 56	0 37
tig00001299	1105941	A	G	0 45	0 42	0 51	0 16	0 43	0 48	0 39	0 44	0 37	0 39	0 72	0 38	0 33	0 39	0 7	0 17	0 18	0 22	0 20	0 20	0 48	0 53	0 25	0 17	0 8	0 22	0 20	0 19	0 38	0 40	0 30	0 16	0 42	0 44	0 27	0 40	0 33	0 33	0 48	0 32	0 55	0 45	0 24	0 25	0 57	0 38
tig00001299	1105941	A	T	0 45	0 42	0 51	0 16	0 43	0 48	0 39	0 44	0 37	0 39	0 72	0 38	0 33	0 39	0 7	0 17	0 18	0 22	0 20	0 20	0 48	0 53	0 25	0 17	0 8	0 22	0 20	0 19	0 38	0 40	0 30	0 16	0 42	0 44	0 27	0 40	0 33	0 33	0 48	0 32	0 55	0 45	0 24	0 25	0 57	0 38
tig00001299	1105957	CCT	TCG	0 45	0 58	0 58	0 19	0 46	0 52	0 41	0 43	0 38	0 40	0 70	0 42	0 34	0 42	0 6	0 14	0 19	0 22	0 22	0 25	0 45	0 49	0 20	0 19	0 12	0 25	0 20	0 18	0 45	0 40	0 30	0 14	0 39	0 50	0 27	0 34	0 34	0 34	0 49	0 32	0 51	0 41	0 26	0 28	0 55	0 44
tig00001299	1105977	T	A	0 47	0 59	0 59	0 24	0 52	0 59	0 45	0 44	0 42	0 43	0 75	0 39	0 36	0 43	0 6	0 15	0 19	0 17	0 22	0 29	0 44	0 46	0 19	0 19	0 11	0 24	0 27	0 13	0 42	0 41	0 38	0 14	0 41	0 51	0 28	0 34	0 38	0 37	0 46	0 35	0 45	0 42	0 26	0 30	0 55	0 48
tig00001299	1105999	C	T	42 0	54 0	56 0	28 0	49 0	59 0	45 0	47 0	55 0	46 0	75 0	32 0	38 0	41 0	6 0	13 0	21 0	16 0	22 0	28 0	51 0	47 0	20 0	17 0	9 0	23 0	27 0	14 0	23 22	0 50	0 38	0 14	0 43	0 43	0 41	19 16	0 36	0 33	0 51	0 36	0 41	0 47	0 29	0 31	0 52	0 51
tig00001299	1106001	A	C	0 43	0 54	0 57	0 29	0 50	0 58	0 43	0 47	0 57	0 48	0 77	0 32	0 38	0 46	0 7	0 14	0 22	0 17	0 22	0 26	0 53	0 47	0 19	0 17	0 9	0 21	0 26	0 14	0 44	0 49	17 22	0 13	0 40	0 44	0 38	0 34	1 33	0 34	0 51	0 34	0 40	0 47	0 28	0 32	0 52	0 47
tig00001299	1106006	T	C	0 44	0 58	0 54	0 31	0 51	0 59	0 43	0 49	0 59	0 49	0 81	0 32	0 38	0 47	0 8	0 14	0 23	0 16	0 22	0 24	0 52	0 49	0 22	0 16	0 8	0 22	0 29	0 13	0 46	0 50	0 40	0 18	0 37	0 43	0 39	0 32	0 29	0 33	0 50	0 32	0 36	0 51	0 25	0 30	0 52	0 47
tig00001299	1106011	G	T	0 43	0 58	0 52	0 29	0 47	0 61	0 42	0 52	0 55	0 50	0 83	0 32	0 40	0 48	0 7	0 15	0 23	0 17	0 21	0 23	0 53	30 18	0 22	0 17	0 8	0 20	0 28	0 13	0 45	0 51	0 42	0 18	0 41	0 41	0 39	0 33	0 33	0 32	0 47	0 30	0 38	0 49	0 26	0 34	0 53	0 45
tig00001299	1106014	AC	A	16 26	0 56	0 51	12 17	0 47	0 60	0 40	0 53	0 57	0 52	0 80	0 31	0 39	0 47	0 7	0 15	0 23	0 16	0 21	0 21	0 57	0 44	0 20	0 16	0 9	0 19	0 27	0 11	0 41	0 52	0 45	0 17	0 39	0 42	0 41	0 33	0 34	0 32	0 47	0 32	0 40	0 48	0 26	0 32	0 49	0 44
tig00001299	1106015	C	G	0 26	0 56	0 51	0 17	0 47	0 60	0 40	0 53	0 57	0 52	0 80	0 31	0 39	0 47	0 7	0 15	0 23	0 16	0 21	0 21	0 57	0 44	0 20	0 16	0 9	0 19	0 27	0 11	0 41	0 52	0 45	0 17	0 39	0 42	0 41	0 33	0 34	0 32	0 47	0 32	0 40	0 48	0 26	0 32	0 49	0 44
tig00001299	1106015	C	T	0 26	0 56	0 51	0 17	0 47	0 60	0 40	0 53	0 57	0 52	0 80	0 31	0 39	0 47	0 7	0 15	0 23	0 16	0 21	0 21	0 57	0 44	0 20	0 16	0 9	0 19	0 27	0 11	0 41	0 52	0 45	0 17	0 39	0 42	0 41	0 33	0 34	0 32	0 47	0 32	0 40	0 48	0 26	0 32	0 49	0 44
tig00001299	1106033	T	C	0 41	0 55	0 48	0 29	0 46	0 59	0 46	0 56	0 53	0 53	0 83	0 45	0 43	0 53	0 7	0 16	0 22	0 13	0 20	0 22	0 57	0 48	0 18	0 14	0 15	0 19	0 29	0 10	0 46	0 49	0 44	0 19	0 39	0 38	0 44	0 31	0 38	0 28	0 43	0 30	0 41	0 48	0 27	0 33	0 50	0 42
tig00001299	1106044	T	C	0 44	0 54	0 51	0 25	0 46	0 65	0 45	0 57	0 50	0 53	0 84	0 47	0 43	0 53	0 7	0 16	0 23	0 10	0 19	0 21	0 56	0 48	0 18	0 14	0 16	0 21	0 29	0 9	0 42	0 48	0 42	0 17	0 40	0 33	0 40	0 31	0 36	0 27	0 46	0 36	0 33	0 44	0 27	0 32	0 45	0 41
tig00001299	1106045	T	C	0 45	0 54	0 50	0 26	0 46	0 63	0 46	0 58	0 51	0 53	0 88	0 47	0 43	0 52	0 7	0 16	0 23	0 10	0 19	0 20	0 57	0 48	0 19	0 14	0 16	0 21	0 28	0 9	0 43	0 48	0 42	0 16	0 41	0 33	0 40	0 32	0 35	0 31	0 46	0 36	0 35	0 44	0 25	0 32	0 46	0 40
tig00001299	1106053	T	TTGA	0 41	0 41	0 40	0 24	0 41	0 59	0 43	0 56	0 45	0 52	0 89	0 42	0 39	0 56	0 8	0 16	0 26	0 9	0 14	0 20	0 51	0 48	0 18	0 13	0 13	0 17	0 31	0 8	0 41	0 45	0 36	0 17	0 38	0 38	0 40	0 35	0 34	0 29	0 44	0 41	0 34	0 44	0 24	0 32	0 48	0 40
tig00001299	1106060	A	C	42 1	42 0	40 0	28 0	44 0	61 0	43 0	56 0	49 0	59 0	89 0	44 0	40 0	58 0	8 0	16 0	25 0	11 0	16 0	19 0	55 0	48 0	20 0	14 0	13 0	18 0	30 0	9 0	21 19	0 48	0 37	0 18	0 35	0 33	0 40	0 29	0 31	0 26	0 38	0 38	0 36	0 41	0 23	0 31	0 43	0 40
tig00001299	1106067	G	T	0 45	0 44	0 42	0 26	0 46	0 63	0 44	0 57	0 46	0 58	0 89	0 45	0 40	0 57	0 8	0 16	0 28	0 11	0 16	0 18	0 58	0 47	0 21	0 16	0 16	0 20	0 31	0 10	0 43	0 45	0 37	0 17	43 0	40 0	41 0	16 13	38 1	29 0	41 0	38 0	40 0	47 0	27 0	31 0	45 0	43 0
tig00001299	1106069	T	C	0 47	0 45	0 41	0 25	0 46	0 62	0 44	0 59	0 46	0 57	0 92	0 44	0 37	0 57	0 8	0 16	0 26	0 11	0 14	0 17	0 58	0 46	0 20	0 15	0 16	0 20	0 31	0 10	0 44	0 43	0 38	0 17	0 43	0 38	0 42	0 30	0 36	0 28	0 42	0 38	0 41	0 47	0 29	0 33	0 47	0 43
tig00001299	1106077	GGAATGT	G	0 49	0 40	0 45	0 21	0 39	0 60	0 38	0 58	0 44	0 54	0 87	0 42	0 35	0 58	0 8	0 14	0 22	0 7	0 12	0 14	0 57	0 37	0 18	0 15	0 17	0 21	0 26	0 9	0 39	0 40	0 41	0 16	0 49	0 33	0 40	0 29	0 33	0 25	0 39	0 37	0 38	0 41	0 26	0 32	0 43	0 42
tig00001299	1106088	ATTGCAGGGT	A	0 48	0 41	0 41	0 18	0 37	0 59	0 35	0 55	0 35	0 54	0 82	0 43	0 38	0 61	0 7	0 16	0 19	0 8	0 13	0 18	0 48	0 39	0 23	0 16	0 17	0 22	0 27	0 7	0 35	0 43	0 35	0 15	0 44	0 28	0 37	0 32	0 32	0 20	0 36	0 32	0 36	0 44	0 21	0 30	0 44	0 37
tig00001299	1106089	T	A	0 48	0 41	0 41	0 18	0 37	0 59	0 35	0 55	0 35	0 54	0 82	0 43	0 38	0 61	0 7	0 16	0 19	0 8	0 13	0 18	0 48	0 39	0 23	0 16	0 17	0 22	0 27	0 7	0 35	0 43	0 35	0 15	0 44	0 28	0 37	0 32	0 32	0 20	0 36	0 32	0 36	0 44	0 21	0 30	0 44	0 37
tig00001299	1106093	AG	A	0 48	0 41	0 41	0 18	0 37	0 59	0 35	0 55	0 35	0 54	0 82	0 43	0 38	0 61	0 7	0 16	0 19	0 8	0 13	0 18	0 48	0 39	0 23	0 16	0 17	0 22	0 27	0 7	0 35	0 43	0 35	0 15	0 44	0 28	0 37	0 32	0 32	0 20	0 36	0 32	0 36	0 44	0 21	0 30	0 44	0 37
tig00001299	1106106	A	G	0 59	0 46	0 51	0 18	0 40	0 68	0 34	0 64	0 41	0 54	0 88	0 49	0 39	0 68	0 6	0 16	0 22	0 12	0 15	0 29	0 57	0 49	0 24	0 22	0 18	0 29	0 35	0 9	0 42	0 48	0 43	0 15	0 55	0 31	0 37	0 34	0 31	0 22	0 41	0 35	0 33	0 50	0 23	0 31	0 50	0 41
tig00001299	1106121	G	T	0 59	0 48	0 55	0 19	0 44	0 67	0 37	0 55	0 37	0 49	0 83	0 52	0 37	0 59	0 7	0 16	1 24	0 15	0 12	0 25	0 50	0 50	0 24	0 22	0 17	0 21	0 36	0 12	0 40	0 49	0 44	0 14	0 56	0 30	0 39	0 37	0 28	0 23	0 43	0 35	0 33	0 53	0 25	0 31	0 52	0 33
tig00001299	1106125	C	CATCA	0 57	0 49	0 57	0 20	0 44	0 68	0 34	0 52	0 37	0 47	0 82	0 46	0 36	0 59	0 8	0 16	0 25	0 15	0 13	0 24	0 52	0 49	0 24	0 21	0 14	0 23	0 35	0 13	0 40	0 46	0 51	0 13	0 56	0 31	0 39	0 37	0 31	0 22	0 43	0 32	0 34	0 52	0 25	0 30	0 50	0 31
tig00001299	1106129	A	T	0 60	0 49	0 58	0 20	0 43	0 71	0 34	0 55	0 38	0 49	0 83	0 45	0 37	0 58	0 8	0 15	0 25	0 15	0 13	0 23	0 56	0 49	0 26	0 21	0 13	0 23	0 36	0 14	0 43	0 46	0 53	0 13	0 59	0 33	0 36	0 37	0 32	0 23	0 45	0 32	0 33	0 46	0 27	0 30	0 49	0 30
tig00001299	1106130	A	G	0 62	0 51	1 57	0 20	0 43	0 71	0 34	0 56	0 38	0 50	0 83	25 19	0 40	0 57	0 8	0 15	0 25	0 15	0 13	0 23	0 57	0 49	0 25	0 21	0 12	0 23	0 37	0 14	0 42	0 46	0 54	0 13	0 56	0 34	0 37	0 36	0 30	0 23	0 44	0 32	0 32	0 47	0 27	0 31	0 49	0 29
tig00001299	1106132	A	G	0 63	0 49	0 55	0 18	0 44	0 70	0 33	0 56	0 39	0 49	0 81	0 44	0 39	0 56	0 8	0 16	0 25	0 15	0 13	0 23	1 56	0 48	0 25	0 21	0 12	0 22	0 36	0 14	0 42	0 45	0 54	0 11	0 57	0 34	0 36	0 35	0 31	0 23	0 44	0 32	0 32	0 46	0 27	0 32	0 52	0 29
tig00001299	1106149	TG	T	0 56	0 50	0 56	0 20	0 46	0 66	0 26	0 50	0 36	0 51	0 70	0 43	0 40	0 55	0 9	0 13	0 18	0 17	0 13	0 24	0 58	0 49	0 26	0 19	0 11	0 22	0 40	0 16	0 47	0 38	0 54	0 11	0 54	0 31	0 31	0 37	0 30	0 21	0 36	0 33	0 29	0 44	0 26	0 30	0 50	0 30
tig00001299	1106152	A	G	0 58	0 52	0 59	0 19	0 47	0 67	0 26	0 52	0 37	0 52	0 74	0 43	0 40	0 55	0 9	0 13	0 19	0 17	0 13	0 23	0 61	0 50	0 27	0 20	0 11	0 23	0 43	0 14	0 50	0 38	0 53	0 11	0 53	0 31	0 32	0 37	0 30	0 20	0 37	0 33	0 29	0 45	0 29	0 29	0 50	0 30
tig00001299	1106161	C	A	0 51	0 54	0 57	0 19	0 47	0 68	0 22	0 54	0 36	0 50	0 81	0 43	0 40	0 54	0 9	0 13	0 17	0 19	0 11	0 24	0 54	0 48	0 28	0 18	0 11	0 24	0 41	0 14	0 58	0 38	0 52	0 11	0 49	0 31	0 34	0 35	0 30	0 22	0 36	0 33	0 28	0 46	0 31	0 29	0 41	0 37
tig00001299	1106168	AAA	TTT	0 45	0 54	0 54	0 19	0 46	0 59	0 20	0 45	0 34	0 43	0 74	0 41	0 38	0 49	0 9	0 11	0 19	0 18	0 9	0 23	0 49	0 50	0 27	0 17	0 7	0 23	0 41	0 13	0 55	0 29	0 46	0 11	0 48	0 35	0 32	0 36	0 27	0 20	0 32	0 31	0 26	0 44	0 30	0 28	0 29	0 23
tig00001299	1106170	A	C	0 45	0 54	0 54	0 19	0 46	0 59	0 20	0 45	0 34	0 43	0 74	0 41	0 38	0 49	0 9	0 11	0 19	0 18	0 9	0 23	0 49	0 50	0 27	0 17	0 7	0 23	0 41	0 13	0 55	0 29	0 46	0 11	0 48	0 35	0 32	0 36	0 27	0 20	0 32	0 31	0 26	0 44	0 30	0 28	13 29	13 23
tig00001299	1106170	AATAT	CATAG	0 45	0 54	0 54	0 19	0 46	0 59	0 20	0 45	0 34	0 43	0 74	0 41	0 38	0 49	0 9	0 11	0 19	0 18	0 9	0 23	0 49	0 50	0 27	0 17	0 7	0 23	0 41	0 13	0 55	0 29	0 46	0 11	0 48	0 35	0 32	0 36	0 27	0 20	0 32	0 31	0 26	0 44	0 30	0 28	0 29	0 23
tig00001299	1106176	CAA	TAG	0 48	0 58	0 56	0 25	0 47	0 62	0 21	0 47	0 35	0 50	0 75	0 49	0 38	0 49	0 7	0 11	0 19	0 20	0 12	0 27	0 47	0 53	0 26	0 20	0 6	0 25	0 41	0 12	0 61	0 29	0 17	0 6	0 54	0 38	0 30	0 39	0 28	0 24	0 33	0 32	0 25	0 43	0 29	0 28	0 42	0 36
tig00001299	1106178	A	G	0 48	0 58	0 56	0 25	0 47	1 62	0 21	0 47	0 35	0 50	0 75	0 49	0 38	0 49	0 7	0 11	0 19	0 20	0 12	0 27	0 47	0 53	0 26	0 20	0 6	0 25	0 41	0 12	0 61	0 29	31 17	4 6	0 54	0 38	0 30	0 39	0 28	0 24	0 33	0 32	0 25	0 43	0 29	0 28	0 42	0 36
tig00001299	1106179	C	T	0 49	0 58	0 58	0 25	0 48	0 63	0 23	0 49	0 36	0 51	0 75	0 49	0 40	0 51	0 7	0 11	0 23	0 20	0 11	0 29	0 48	31 23	0 28	0 20	0 6	0 26	0 41	0 12	0 62	0 30	0 51	0 10	0 57	0 38	0 32	0 40	0 27	0 24	0 36	0 32	0 25	0 44	0 31	0 28	0 43	0 36
tig00001299	1106189	T	C	0 47	0 55	0 59	0 25	0 52	0 63	0 26	0 48	0 38	0 50	0 82	0 51	0 37	0 43	0 7	0 11	0 24	0 18	0 12	0 25	0 47	0 49	0 25	0 22	0 5	0 24	0 41	0 16	0 60	0 29	0 52	0 12	0 56	0 39	0 32	0 40	0 22	0 17	0 28	0 26	0 25	0 43	0 27	0 26	0 40	0 35
tig00001299	1106196	C	CCTGTGTGG	0 43	0 52	0 58	0 27	0 49	0 57	0 25	0 47	0 33	0 53	0 75	0 50	0 37	0 36	0 7	0 13	0 21	0 18	0 11	0 19	0 41	0 35	0 23	0 18	0 5	0 23	0 40	0 14	0 56	0 16	0 43	0 12	0 53	0 36	0 35	0 39	0 25	0 22	0 34	0 27	0 22	0 47	0 31	0 30	0 37	0 37
tig00001299	1106202	C	T	0 47	0 54	0 63	0 29	0 48	0 58	0 27	0 49	0 34	0 58	0 81	0 50	0 38	0 42	0 8	0 14	0 22	0 18	0 14	0 21	0 51	0 41	0 25	0 19	0 5	0 23	0 39	0 15	0 62	0 17	0 47	0 12	0 54	0 35	0 37	0 39	0 27	0 22	0 35	0 27	0 23	0 47	0 30	0 31	0 38	0 38
tig00001299	1106206	GA	G	0 40	0 51	0 64	0 28	0 51	0 55	0 29	0 48	0 34	0 56	0 80	0 49	0 34	0 42	0 9	0 12	0 21	0 17	0 13	0 22	0 54	0 42	0 28	0 19	0 4	0 24	0 36	0 16	0 58	0 16	0 48	0 12	0 54	0 35	0 31	0 41	0 27	0 22	0 36	0 25	0 23	0 46	0 31	0 29	0 37	0 39
tig00001299	1106211	C	A	0 42	0 52	0 68	0 30	0 49	0 58	0 28	0 48	0 33	0 59	0 81	0 49	0 34	0 43	0 9	0 14	0 21	0 17	0 13	0 24	0 56	0 43	0 28	0 19	0 5	0 26	0 35	0 15	27 31	0 19	0 48	0 11	58 0	35 0	33 0	24 20	25 0	22 0	36 0	24 0	21 0	48 0	30 0	28 0	37 0	42 0
tig00001299	1106234	G	GT	0 51	0 57	0 60	0 31	0 45	0 44	0 34	0 50	0 32	0 54	0 72	0 36	0 29	0 37	0 5	0 17	0 21	0 19	0 15	0 26	0 55	0 41	0 28	0 22	0 5	0 22	0 30	0 13	0 50	0 22	0 44	0 15	0 54	0 34	0 41	0 44	0 25	0 27	0 31	0 25	0 17	0 47	0 25	0 32	0 38	0 38
tig00001299	1106240	G	T	0 51	0 57	0 60	0 31	0 45	0 44	0 34	0 50	0 32	0 54	0 72	0 36	0 29	0 37	0 5	0 17	0 21	0 19	0 15	0 26	0 55	0 41	0 28	0 22	0 5	0 22	0 30	0 13	0 50	0 22	0 44	0 15	0 54	0 34	0 41	0 44	0 25	0 27	0 31	0 25	0 17	0 47	0 25	0 32	0 38	0 38
tig00001299	1106244	G	T	0 57	0 62	0 60	0 34	0 45	0 52	0 38	0 52	0 34	0 56	0 76	0 39	0 31	0 39	0 6	0 23	0 22	0 18	0 16	0 26	0 58	0 45	0 31	0 25	0 6	0 25	0 29	0 15	0 49	24 0	24 24	6 11	0 47	0 34	0 40	0 41	0 24	0 33	0 36	0 27	0 19	0 47	0 28	0 32	0 36	0 41
tig00001299	1106247	AT	A	0 57	0 59	0 56	0 34	0 41	0 50	0 39	0 53	0 35	0 56	0 72	0 38	0 32	0 35	0 5	0 24	0 22	0 17	0 17	0 24	0 52	0 43	0 31	0 25	0 6	0 24	0 21	0 14	0 45	0 22	0 46	0 15	0 47	0 32	0 40	0 41	0 26	0 32	0 36	0 26	0 19	0 45	0 27	0 31	0 33	0 41
tig00001299	1106248	TTC	CTG	0 57	0 59	0 56	0 34	0 41	0 50	0 39	0 53	0 35	0 56	0 72	0 38	0 32	0 35	0 5	0 24	0 22	0 17	0 17	0 24	0 52	0 43	0 31	0 25	0 6	0 24	0 21	0 14	0 45	0 22	0 46	0 15	0 47	0 32	0 40	0 41	0 26	0 32	0 36	0 26	0 19	0 45	0 27	0 31	0 33	0 41
tig00001299	1106255	T	C	0 62	0 62	0 55	0 35	0 47	0 57	0 42	0 57	0 36	0 59	0 74	0 41	0 36	0 41	0 5	0 24	0 23	0 18	0 19	0 27	0 56	0 45	0 32	0 27	0 6	0 25	0 21	0 16	0 44	0 23	0 44	0 15	0 46	0 30	0 41	0 42	0 25	0 32	0 37	0 29	0 19	0 44	0 28	0 32	0 33	0 40
tig00001299	1106267	AC	GT	0 60	0 69	0 52	0 31	0 47	0 59	0 42	0 55	0 43	0 60	0 72	0 42	0 36	0 40	0 5	0 22	0 21	0 19	0 22	0 29	0 61	0 42	0 28	0 26	0 8	0 20	0 24	0 16	0 47	0 25	0 44	0 16	0 46	0 30	0 45	0 39	0 25	0 34	0 39	0 26	0 22	0 41	0 26	0 29	0 31	0 42
tig00001299	1106270	CGTCA	TGTCC	0 59	0 68	0 50	0 25	0 44	0 55	0 41	0 54	0 40	0 58	0 72	0 38	0 34	0 39	0 5	0 20	0 21	0 17	0 19	0 24	0 60	0 41	0 29	0 25	0 7	0 20	0 19	0 15	0 41	0 24	0 44	0 15	0 46	0 31	0 45	0 39	0 23	0 33	0 42	0 24	0 20	0 38	0 25	0 29	0 31	0 41
tig00001299	1106279	G	A	0 61	0 71	0 53	0 28	0 45	0 57	0 44	0 57	0 46	0 58	0 75	0 36	0 34	0 39	0 5	0 22	0 21	0 16	0 18	0 25	0 67	0 41	0 29	0 25	0 7	0 21	0 20	0 16	0 42	0 28	0 46	0 17	0 49	0 27	0 47	0 41	0 19	0 35	0 43	0 25	0 24	0 37	0 26	0 30	0 30	0 41
tig00001299	1106286	T	C	0 56	0 72	0 47	0 27	0 41	0 53	0 41	0 53	0 46	0 52	1 65	0 31	0 31	0 43	0 5	0 23	0 18	0 17	0 19	0 23	0 65	0 38	0 28	0 24	0 9	0 21	0 21	0 12	17 26	0 24	0 44	0 17	52 0	30 0	46 0	19 23	18 0	32 0	42 0	21 0	23 0	33 0	29 0	28 0	29 0	40 0
tig00001299	1106294	T	A	0 57	0 68	0 48	0 28	0 38	0 52	0 43	0 53	0 52	0 53	0 70	0 29	0 34	0 46	0 5	0 20	0 18	0 16	0 22	0 23	0 72	0 39	0 29	0 25	0 10	0 23	0 21	0 13	0 48	0 23	19 25	11 5	0 55	0 36	0 47	0 43	0 20	0 35	0 43	0 22	0 24	0 36	0 31	0 32	0 33	0 41
tig00001299	1106297	G	A	0 55	0 68	0 49	0 30	0 40	0 54	0 42	0 49	0 51	0 52	0 69	0 29	0 37	0 47	0 5	0 20	0 17	0 18	0 21	0 21	0 70	0 38	0 28	0 25	0 11	0 23	0 22	0 13	0 48	0 21	0 43	0 18	0 55	0 38	0 49	0 42	0 20	0 34	0 46	0 23	0 22	0 41	0 30	0 31	0 33	0 40
tig00001299	1106321	C	T	0 48	0 68	1 57	0 30	0 46	0 57	0 40	0 54	0 58	0 46	0 70	0 43	0 47	1 51	0 4	0 20	0 17	0 13	0 17	0 18	0 61	0 43	0 18	0 25	0 13	0 20	0 22	0 15	0 49	0 20	0 41	0 18	0 61	0 34	0 49	0 42	0 15	0 33	0 48	0 27	0 28	0 43	0 26	0 31	0 28	0 34
tig00001299	1106331	A	C	0 44	0 58	0 57	0 28	0 42	0 60	0 34	0 55	0 57	0 45	0 75	0 45	0 49	0 54	0 5	0 18	0 15	0 11	0 22	0 18	0 59	0 46	0 17	0 23	0 15	0 21	0 24	0 14	0 51	0 27	0 41	0 16	0 58	0 32	0 46	0 34	0 12	0 32	0 43	0 25	0 33	0 42	0 26	0 28	0 22	0 35
tig00001299	1106347	A	G	0 44	0 56	0 63	0 27	0 44	0 59	0 37	0 56	0 58	0 48	0 78	0 45	0 50	0 55	0 4	0 14	0 15	0 14	0 23	0 19	0 63	0 45	0 10	0 19	0 15	0 18	0 27	0 15	0 52	0 31	0 37	0 18	0 62	0 30	0 44	0 34	0 16	0 34	0 48	0 24	0 35	0 37	0 31	0 29	0 30	0 30
tig00001299	1106354	T	G	0 39	0 51	0 62	0 25	0 38	0 54	0 36	0 51	0 58	0 43	0 70	0 41	0 46	0 50	0 4	0 13	0 15	0 12	0 22	0 19	0 56	0 43	0 9	0 18	0 15	0 17	0 27	0 13	0 49	15 14	20 18	7 11	0 61	0 31	0 42	0 35	0 17	0 36	0 51	0 24	0 33	0 40	0 29	0 29	0 30	0 29
tig00001299	1106362	G	C	0 37	0 41	0 58	0 23	0 34	0 46	0 34	0 48	0 53	0 38	0 63	0 39	0 44	0 46	0 4	0 12	0 14	0 11	0 19	0 15	0 49	0 39	0 9	0 16	0 12	0 15	0 23	0 13	0 41	0 15	0 17	0 11	0 60	0 33	0 42	0 37	0 20	0 42	0 52	0 25	0 33	0 41	0 30	0 30	0 31	0 27
tig00001299	1106362	GT	G	0 37	0 41	0 58	0 23	0 34	0 46	0 34	0 48	0 53	0 38	0 63	0 39	0 44	0 46	0 4	0 12	0 14	0 11	0 19	0 15	0 49	0 39	0 9	0 16	0 12	0 15	0 23	0 13	0 41	13 15	15 17	7 11	0 60	0 33	0 42	0 37	0 20	0 42	0 52	0 25	0 33	0 41	0 30	0 30	0 31	0 27
tig00001299	1106362	G	GTATA	0 37	0 41	0 58	0 23	0 34	0 46	0 34	0 48	0 53	0 38	0 63	0 39	0 44	0 46	0 4	0 12	0 14	0 11	0 19	0 15	0 49	0 39	0 9	0 16	0 12	0 15	0 23	0 13	0 41	0 15	0 17	0 11	0 60	0 33	0 42	0 37	0 20	0 42	0 52	0 25	0 33	0 41	0 30	0 30	0 31	0 27
tig00001299	1106363	T	C	0 37	0 41	0 58	0 23	0 34	0 46	0 34	0 48	0 53	0 38	0 63	0 39	0 44	0 46	0 4	0 12	0 14	0 11	0 19	0 15	0 49	0 39	0 9	0 16	0 12	0 15	0 23	0 13	0 41	0 15	0 17	0 11	0 60	0 33	0 42	0 37	0 20	0 42	0 52	0 25	0 33	0 41	0 30	0 30	0 31	0 27
tig00001299	1106367	C	T	0 37	0 39	0 54	0 23	0 33	0 46	0 33	0 48	0 49	0 38	0 62	0 39	0 43	0 45	0 4	0 13	0 14	0 11	0 17	0 15	0 48	0 38	0 10	0 15	0 12	0 13	0 21	0 13	0 41	0 27	0 32	0 19	0 63	0 33	0 43	0 38	0 20	0 43	0 52	0 28	0 31	0 42	0 30	0 31	0 31	0 27
tig00001299	1106388	G	A	0 29	0 30	0 41	0 16	0 28	0 37	0 24	0 36	0 36	0 28	0 52	0 33	0 38	0 32	0 4	0 10	0 11	0 8	0 17	0 12	0 36	0 33	0 7	0 10	0 9	0 10	0 14	0 11	0 28	0 33	0 29	0 20	0 73	0 32	0 43	0 33	0 17	0 38	0 52	0 26	0 35	0 40	0 30	0 29	0 28	0 23
tig00001299	1106390	G	A	0 31	0 29	0 41	0 16	0 31	0 38	0 24	0 35	0 37	0 28	0 51	0 32	0 38	0 31	0 4	0 10	0 11	0 7	0 16	0 13	0 33	0 33	0 7	0 10	0 9	0 9	0 16	0 11	0 29	0 34	0 32	0 20	0 74	0 32	0 42	0 32	0 20	0 35	2 48	0 26	0 35	0 39	0 31	0 30	0 28	0 22
tig00001299	1106409	A	G	0 23	0 25	0 28	0 9	0 24	0 27	0 20	0 27	0 26	0 32	0 40	0 22	0 26	0 23	0 5	0 8	0 13	0 6	0 16	0 12	0 28	0 22	0 6	0 10	0 10	0 11	0 14	0 5	0 24	0 32	0 26	0 21	0 84	0 35	0 39	0 33	0 24	0 36	0 48	0 21	0 32	0 38	0 31	0 28	0 32	0 26
tig00001299	1106419	T	A	0 27	0 33	0 29	0 11	0 25	0 33	0 21	0 29	1 25	0 36	0 44	0 25	0 34	0 26	0 5	0 9	0 14	0 7	0 15	0 14	0 27	0 28	0 7	0 11	0 12	0 13	0 17	0 8	0 31	0 34	0 31	0 22	0 83	0 32	0 37	0 33	0 23	0 37	0 46	0 21	0 35	0 37	0 32	0 30	0 35	0 25
tig00001299	1106425	T	G	0 28	0 34	0 31	0 12	0 26	0 33	0 19	0 28	0 24	0 32	0 40	0 25	0 29	0 26	0 4	0 8	0 15	0 7	0 11	0 12	0 28	0 28	0 6	0 12	0 12	0 15	0 17	0 8	0 28	0 36	0 29	0 22	0 82	0 34	0 38	0 33	0 26	0 39	0 48	0 26	0 39	0 37	0 33	0 28	0 38	0 26
tig00001299	1106431	A	T	0 31	0 37	0 28	0 13	0 28	0 31	0 22	0 29	0 24	0 36	0 39	0 21	0 31	0 22	0 4	0 9	0 16	0 8	0 9	0 13	0 29	0 29	0 10	0 13	0 10	0 14	0 16	0 9	0 29	0 37	0 34	0 20	0 76	0 30	0 39	0 29	0 28	0 40	0 46	0 27	0 36	0 36	0 29	0 30	0 38	0 27
tig00001299	1106438	CT	GC	20 0	31 0	15 0	8 0	18 0	25 0	16 0	20 0	12 0	27 0	23 0	17 0	23 0	12 0	4 0	6 0	9 0	5 0	4 0	8 0	22 0	23 0	10 0	11 0	8 0	13 0	13 0	6 0	24 0	32 0	31 0	21 0	72 0	23 0	38 0	30 0	27 0	38 0	42 0	26 0	39 0	35 0	30 0	27 0	33 0	26 0
tig00001299	1106438	CTAA	GCAG	0 0	0 0	0 0	0 0	0 0	0 0	0 0	0 0	0 0	0 0	0 0	0 0	0 0	0 0	0 0	0 0	0 0	0 0	0 0	0 0	0 0	0 0	0 0	0 0	0 0	0 0	0 0	0 0	0 0	0 0	0 0	0 0	0 0	0 0	0 0	0 0	0 0	0 0	0 0	0 0	0 0	0 0	0 0	0 0	0 0	0 0
tig00001299	1106443	GT	G	0 25	0 33	0 21	0 9	0 22	0 28	0 18	0 30	0 19	0 36	0 31	0 25	0 28	0 18	0 4	0 8	0 13	0 6	0 5	0 11	0 25	0 33	0 11	0 14	0 9	0 15	0 20	0 10	0 32	0 34	0 37	0 22	0 71	0 20	0 40	0 29	0 26	0 37	0 40	0 25	0 40	0 35	0 33	0 26	0 37	0 26
tig00001299	1106451	A	T	0 28	0 33	0 24	0 10	0 24	0 32	0 21	0 32	0 23	0 38	0 31	0 25	0 30	0 23	0 5	0 10	0 14	0 8	0 6	0 15	0 29	0 34	0 11	0 14	0 9	0 15	0 23	0 10	0 35	0 40	0 37	0 21	0 69	0 23	0 38	17 15	0 26	0 40	0 42	0 28	0 39	0 35	0 32	0 27	0 41	0 24
tig00001299	1106452	C	A	0 30	0 35	0 25	0 11	0 25	0 33	0 21	0 35	0 27	0 40	0 33	0 25	0 30	0 23	0 5	0 10	0 14	0 8	0 6	0 16	0 30	0 35	0 12	0 15	0 9	0 15	0 23	0 9	0 35	0 41	0 39	0 20	0 69	0 24	0 38	0 31	0 27	0 39	0 42	0 28	0 39	0 37	0 34	0 27	0 43	0 24
tig00001299	1106453	T	G	0 30	0 35	0 27	0 11	0 26	0 34	0 21	0 36	0 28	0 40	0 33	0 25	0 31	0 24	0 5	0 9	0 14	0 9	0 6	12 5	0 31	0 36	0 12	0 15	0 9	0 15	0 23	0 10	0 36	0 41	0 40	0 21	0 69	0 24	0 39	0 31	0 27	0 40	0 42	0 27	0 39	0 38	0 32	0 27	0 42	0 24
tig00001299	1106468	A	G	0 41	0 44	0 31	0 16	0 35	0 42	0 28	0 44	0 33	0 51	0 53	0 28	0 41	0 28	0 5	0 12	0 16	0 13	0 6	0 19	0 40	0 47	0 14	0 19	0 14	0 19	0 28	0 13	0 44	0 47	0 47	0 21	0 62	0 26	0 39	0 31	0 31	0 44	0 50	0 30	14 20	13 23	0 33	0 29	0 47	0 23
tig00001299	1106474	T	CGATC	0 42	0 48	0 32	0 17	0 38	0 44	0 30	0 50	0 35	0 56	0 57	0 29	0 44	0 30	0 5	0 12	0 17	0 13	0 6	0 21	0 41	0 50	0 16	0 20	0 14	0 20	0 30	0 14	0 45	0 48	0 47	0 21	0 63	0 28	0 43	0 31	0 32	0 44	0 54	0 28	0 34	0 34	0 33	0 28	0 49	0 22
tig00001299	1106485	T	G	0 46	0 63	0 43	0 18	0 45	0 50	0 34	0 60	0 39	0 62	0 67	0 40	0 49	0 34	0 6	0 16	0 19	0 15	0 6	0 24	0 44	0 55	0 19	0 22	0 14	0 23	0 31	0 18	1 49	0 50	0 51	0 19	0 60	0 31	0 44	0 35	0 29	0 41	0 57	0 30	0 31	0 38	0 32	0 26	0 47	0 23
tig00001299	1106488	A	T	0 47	0 65	0 44	0 19	0 45	0 52	0 34	0 61	0 40	0 59	0 63	0 39	0 52	0 35	0 6	0 16	0 19	0 15	0 5	0 25	0 44	0 53	0 20	0 21	0 15	0 24	0 31	0 17	0 54	0 50	0 48	0 19	0 63	0 31	0 47	0 37	0 29	0 41	0 56	0 30	0 30	0 40	0 29	0 26	0 47	0 22
tig00001299	1106497	A	T	0 49	0 65	0 46	0 19	0 41	0 49	0 36	0 64	0 38	0 62	0 67	0 42	0 50	0 35	0 8	0 17	0 18	0 13	0 4	0 22	0 44	0 59	0 21	0 18	0 13	0 25	0 30	0 19	25 25	0 49	0 44	0 18	62 0	33 0	48 0	16 18	29 0	38 0	58 0	30 0	30 0	41 0	29 0	25 0	40 0	20 0
tig00001299	1106498	TG	T	0 47	0 63	0 45	0 18	0 41	0 48	0 35	0 62	0 36	0 61	0 65	0 42	0 50	0 33	0 7	0 18	0 18	0 11	0 5	0 21	0 41	31 26	0 21	0 17	0 11	0 24	0 30	0 19	0 48	0 47	0 46	0 18	0 63	0 33	0 48	0 35	0 29	0 40	0 56	0 30	0 30	0 39	0 29	0 25	0 41	0 19
tig00001299	1106509	T	C	0 48	0 63	0 46	0 20	0 43	0 49	0 34	0 63	0 37	0 58	0 64	0 37	0 48	0 38	0 5	0 17	0 20	0 13	0 7	0 19	0 42	0 62	0 21	0 23	0 9	0 22	0 29	0 17	0 48	0 53	0 48	0 19	0 56	0 33	0 50	0 32	0 30	0 40	0 56	0 31	0 31	0 33	0 32	0 24	0 43	0 18
tig00001299	1106522	T	C	0 40	0 55	0 40	0 19	0 41	0 44	0 34	0 56	0 34	0 53	0 58	1 32	0 37	0 37	0 4	0 15	0 18	0 13	0 8	0 17	0 42	0 55	0 22	0 22	0 8	0 19	0 27	0 15	0 44	0 47	0 46	0 15	0 49	0 34	0 51	0 32	0 28	0 32	0 64	0 27	0 29	0 40	0 39	0 25	0 43	0 19
tig00001299	1106525	A	G	0 41	0 54	0 39	0 19	0 41	0 44	0 35	0 55	0 35	0 54	0 59	0 31	0 38	0 39	0 4	0 13	0 17	0 12	0 8	0 18	0 42	0 55	0 21	0 21	0 8	0 15	0 26	0 12	0 42	0 45	0 48	0 16	0 48	0 34	0 51	0 32	0 27	0 32	0 63	0 30	0 29	0 40	0 37	0 27	0 43	0 19
tig00001299	1106533	ACCTT	TCCTC	2 0	0 0	0 0	1 0	0 0	0 0	0 0	0 0	1 0	0 0	0 0	0 0	0 0	0 0	0 0	0 0	0 0	0 0	0 0	0 0	0 0	0 0	0 0	0 0	0 0	0 0	0 0	0 0	0 0	0 0	24 0	5 0	0 0	0 0	0 0	0 0	0 0	0 0	0 0	0 0	0 0	0 0	0 0	0 0	0 0	0 0
tig00001299	1106535	CTT	ATC	0 0	0 0	0 0	0 0	0 0	0 0	0 0	0 0	0 0	0 0	0 0	0 0	0 0	0 0	0 0	0 0	0 0	0 0	0 0	0 0	0 0	0 0	0 0	0 0	0 0	0 0	0 0	0 0	0 0	0 0	0 0	0 0	0 0	0 0	0 0	0 0	0 0	0 0	0 0	0 0	0 0	1 0	0 0	0 0	0 0	0 0
tig00001299	1106537	T	C	34 0	50 0	36 0	18 0	35 0	40 0	30 0	50 0	31 0	47 0	55 0	27 0	35 0	32 0	4 0	14 0	12 0	10 0	6 0	18 0	38 0	53 0	15 0	13 0	9 0	16 0	21 0	12 0	33 0	42 0	22 0	8 0	40 0	31 0	46 0	33 0	27 0	32 0	60 0	28 0	32 0	38 0	37 0	27 0	40 0	17 0
tig00001299	1106537	TT	CC	0 0	0 0	0 0	0 0	0 0	0 0	0 0	0 0	0 0	0 0	0 0	0 0	0 0	0 0	0 0	0 0	0 0	0 0	0 0	0 0	0 0	0 0	0 0	0 0	0 0	0 0	0 0	0 0	0 0	0 0	0 0	0 0	0 0	0 0	0 0	0 0	0 0	0 0	0 0	0 0	0 0	0 0	0 0	0 0	0 0	0 0
tig00001299	1106542	G	C	0 42	0 61	0 46	0 21	0 37	0 46	0 36	0 48	0 34	0 53	0 63	0 31	0 35	0 48	0 3	0 16	0 15	0 13	0 9	0 17	0 49	0 56	0 17	0 23	0 10	0 17	0 22	0 12	0 39	0 45	0 55	0 12	0 41	0 30	0 45	0 34	0 25	0 33	0 60	0 24	0 37	0 40	0 36	0 27	0 39	0 18
tig00001299	1106553	A	T	0 43	0 66	0 47	0 22	0 44	0 49	0 44	0 49	0 31	0 54	0 71	0 38	0 34	0 44	0 6	0 17	0 16	0 13	0 11	0 14	1 49	23 28	0 16	0 25	0 14	0 21	0 22	0 12	0 47	0 45	0 54	0 12	0 39	0 32	0 49	0 34	0 27	0 36	0 59	0 31	0 37	0 43	0 35	0 27	0 38	0 17
tig00001299	1106563	A	C	0 37	0 67	0 47	0 20	0 41	0 51	0 44	0 47	0 31	0 50	0 64	0 43	0 34	0 43	0 6	0 20	0 16	0 10	0 12	0 15	0 48	0 51	0 18	0 24	0 12	0 15	0 22	0 12	0 44	25 23	0 59	0 13	0 39	0 34	0 52	0 33	0 32	0 34	0 60	0 34	0 36	0 45	0 36	0 26	0 38	0 18
tig00001299	1106569	A	G	0 44	0 63	0 52	0 20	0 35	0 52	0 44	0 44	0 30	0 51	0 63	0 45	0 33	0 51	0 7	0 19	0 17	0 11	0 13	0 17	0 49	0 52	0 18	0 23	0 12	0 15	0 21	0 12	0 41	0 48	0 57	0 13	0 36	0 38	0 49	0 30	0 32	0 34	0 63	0 32	0 33	0 46	0 34	0 24	0 36	0 18
tig00001299	1106571	T	C	0 43	0 63	0 51	0 19	0 35	0 53	0 45	0 44	0 31	0 50	0 63	0 44	0 32	0 52	0 7	0 19	0 16	0 11	0 13	0 17	0 54	0 49	0 18	0 22	0 12	0 15	0 20	0 12	0 41	0 49	0 51	1 12	0 36	0 38	0 50	0 32	0 34	0 35	0 62	0 33	0 33	0 47	0 35	0 27	0 40	0 18
tig00001299	1106572	G	T	0 45	0 62	0 52	0 20	0 35	0 54	0 45	0 42	0 30	0 51	0 61	0 44	0 32	0 51	0 7	0 19	0 16	0 11	0 13	0 16	0 54	0 49	0 18	0 22	0 12	0 15	0 20	0 12	0 41	0 49	0 50	0 13	0 36	0 40	0 52	0 32	0 33	0 35	0 62	0 32	0 32	0 47	0 35	0 27	0 38	0 20
tig00001299	1106576	C	T	0 45	0 60	0 50	0 20	0 34	0 56	0 48	0 47	0 31	0 53	0 58	0 42	0 32	0 49	0 8	0 17	0 18	0 11	0 15	0 14	0 52	0 52	0 15	0 23	0 12	0 17	0 21	0 12	0 41	0 52	0 50	0 13	0 35	0 38	0 50	0 32	0 30	0 30	0 58	0 31	0 33	0 44	0 33	0 25	0 39	0 20
tig00001299	1106580	A	G	0 45	0 58	0 48	0 21	0 38	0 56	0 48	0 40	0 35	0 53	0 64	20 23	0 33	0 50	0 8	0 14	0 16	0 10	0 16	0 13	0 54	0 54	0 14	0 23	0 12	0 16	0 24	0 11	0 45	0 53	0 52	0 13	0 37	0 43	0 48	0 31	0 32	0 29	0 63	0 28	0 34	0 44	0 33	0 23	0 39	0 21
tig00001299	1106580	A	T	0 45	0 58	0 48	0 21	0 38	0 56	0 48	0 40	0 35	0 53	0 64	0 23	0 33	0 50	0 8	0 14	0 16	0 10	0 16	0 13	0 54	0 54	0 14	0 23	0 12	0 16	0 24	0 11	0 45	0 53	0 52	0 13	0 37	0 43	0 48	0 31	0 32	0 29	0 63	0 28	0 34	0 44	0 33	0 23	0 39	0 21
tig00001299	1106590	G	C	0 49	0 54	0 45	0 19	0 34	0 55	0 50	0 36	0 34	0 55	0 62	0 43	0 35	28 21	0 7	0 16	0 15	0 12	0 19	0 13	0 55	0 52	0 15	0 23	0 12	0 14	0 23	0 11	0 38	0 48	0 58	0 12	0 36	0 43	0 46	0 32	0 32	0 30	0 65	0 31	0 32	0 40	0 29	0 22	0 36	0 22
tig00001299	1106592	A	G	0 46	0 50	0 45	0 18	0 33	0 56	0 47	0 33	1 32	0 50	0 60	0 40	0 37	1 47	0 6	0 15	0 13	0 12	0 18	0 13	0 53	0 47	0 14	0 22	0 12	0 14	0 23	0 10	0 37	19 26	0 55	0 12	0 36	0 45	0 45	0 30	0 32	0 30	0 66	0 29	0 30	0 38	0 30	0 22	0 35	0 21
tig00001299	1106592	AAAAG	GAAGC	0 46	0 50	0 45	0 18	0 33	0 56	0 47	0 33	0 32	0 50	0 60	0 40	0 37	0 47	0 6	0 15	0 13	0 12	0 18	0 13	0 53	0 47	0 14	0 22	0 12	0 14	0 23	0 10	0 37	0 26	0 55	0 12	0 36	0 45	0 45	0 30	0 32	0 30	0 66	0 29	0 30	0 38	0 30	0 22	0 35	0 21
tig00001299	1106594	A	G	0 46	0 50	0 45	0 18	0 33	0 56	0 47	0 33	0 32	0 50	0 60	0 40	0 37	0 47	0 6	0 15	0 13	0 12	0 18	0 13	0 53	0 47	0 14	0 22	0 12	0 14	0 23	0 10	0 37	0 26	0 55	0 12	0 36	0 45	0 45	0 30	0 32	0 30	0 66	0 29	0 30	0 38	0 30	0 22	0 35	0 21
tig00001299	1106604	TA	T	0 50	0 50	0 45	0 19	0 35	0 53	0 49	0 36	0 34	0 53	0 62	0 42	0 39	0 50	0 7	0 16	0 14	0 11	0 18	0 17	0 61	0 42	0 14	0 18	0 13	0 15	0 21	0 12	16 24	0 46	0 57	0 11	36 0	42 0	43 0	18 12	33 0	29 0	61 0	28 0	34 0	32 0	30 0	21 0	27 0	25 0
tig00001299	1106605	A	G	0 50	0 50	0 45	0 19	0 35	0 53	0 49	0 36	0 34	0 53	0 62	0 42	0 39	0 50	0 7	0 16	0 14	0 11	0 18	0 17	0 61	0 42	0 14	0 18	0 13	0 15	0 21	0 12	0 24	0 46	0 57	0 11	0 0	0 0	0 0	0 12	0 0	0 0	0 0	0 0	0 0	0 0	0 0	0 0	0 0	0 0
tig00001299	1106620	T	C	0 54	0 64	0 54	0 22	0 40	0 62	0 55	0 47	0 40	0 59	0 78	0 49	0 47	0 58	0 7	0 21	0 15	0 14	0 22	0 22	0 61	0 50	0 19	0 21	0 17	0 16	0 24	0 16	0 46	0 47	0 59	0 12	0 38	0 37	0 40	0 37	0 29	0 24	0 54	0 28	0 34	0 34	0 31	0 18	0 27	0 29
tig00001299	1106626	C	T	0 57	0 64	0 51	0 23	0 41	0 60	0 54	0 48	0 39	0 61	0 76	0 47	0 49	0 55	0 7	0 19	0 16	0 15	0 24	0 19	0 60	0 50	0 19	0 21	0 16	0 18	0 27	0 17	0 43	0 48	0 53	0 10	0 35	0 39	0 35	0 39	0 29	0 23	0 57	0 32	0 39	0 36	0 34	0 19	0 30	0 27
tig00001299	1106631	C	A	0 57	0 62	0 50	0 23	0 41	0 58	0 50	0 47	0 37	0 63	0 77	0 45	0 50	0 55	0 7	0 16	0 18	0 15	0 24	0 20	0 58	0 48	0 19	0 21	0 15	0 17	0 28	0 17	21 24	0 46	0 50	0 9	32 0	35 0	35 0	24 14	28 0	22 0	55 0	32 0	35 4	33 0	30 0	18 0	32 0	27 0
tig00001299	1106632	ACTC	CCTG	0 56	0 60	0 50	0 23	0 42	0 55	0 50	0 45	0 34	0 62	0 83	0 45	0 50	0 57	0 7	0 15	0 18	0 15	0 24	0 21	0 58	0 47	0 18	0 22	0 16	0 18	0 27	0 17	0 42	0 45	0 49	0 9	0 36	0 38	0 34	0 39	0 28	0 23	0 53	0 32	0 40	0 33	0 33	0 19	0 33	0 27
tig00001299	1106638	C	T	0 54	0 62	0 53	0 24	0 45	0 59	0 50	0 46	0 40	0 62	0 78	0 48	0 51	0 59	0 8	0 15	0 19	0 14	0 26	0 20	0 60	0 48	0 19	0 21	0 21	0 20	0 29	0 18	0 47	0 43	0 52	0 9	0 34	0 39	0 37	0 38	0 28	0 22	0 53	0 32	0 41	0 34	0 34	0 19	0 33	0 26
tig00001299	1106639	A	T	0 55	0 61	0 52	0 23	0 44	0 59	0 49	0 46	0 40	0 60	0 78	0 49	0 53	0 60	0 9	0 14	0 18	0 15	0 27	0 21	0 60	0 48	0 19	0 19	0 20	0 19	0 29	0 18	0 47	0 44	0 53	0 9	0 32	0 39	0 35	0 37	0 29	0 22	0 53	0 31	0 41	0 32	0 36	0 19	0 32	0 26
tig00001299	1106640	G	C	0 57	0 61	0 53	0 23	0 44	0 59	0 51	0 47	0 40	0 61	0 78	0 48	0 53	0 61	0 11	0 14	0 19	0 15	0 27	0 21	0 60	0 49	0 21	0 18	0 21	0 19	0 29	0 18	0 48	0 45	0 52	0 9	0 30	0 39	0 36	0 37	0 29	0 22	0 51	0 31	0 43	0 33	0 36	0 17	0 35	0 26
tig00001299	1106646	TCGAGGGT	CCGTGGGC	0 50	0 49	0 46	0 20	0 40	0 51	0 41	0 41	0 35	0 54	0 69	0 38	0 50	0 54	0 8	0 12	0 15	0 13	0 23	0 21	0 52	0 46	0 22	0 17	0 16	0 15	0 28	0 18	0 37	0 38	0 42	0 9	0 36	0 37	0 31	0 34	0 29	0 18	0 44	0 29	0 38	0 34	0 32	0 18	0 30	0 24
tig00001299	1106653	T	C	0 50	0 49	0 46	0 20	0 40	0 51	0 41	0 41	0 35	0 54	0 69	0 38	0 50	0 54	0 8	0 12	0 15	0 13	0 23	0 21	0 52	0 46	0 22	0 17	0 16	0 15	0 28	0 18	0 37	0 38	0 42	0 9	0 36	0 37	0 31	0 34	0 29	0 18	0 44	0 29	0 38	0 34	0 32	0 18	0 30	0 24
tig00001299	1106661	T	A	0 59	0 60	0 54	0 22	0 47	0 55	0 50	0 45	0 41	0 59	0 73	0 40	0 51	0 56	0 8	0 17	0 18	0 16	0 24	0 21	0 61	0 50	0 23	0 17	0 17	0 17	0 31	0 20	0 43	0 39	27 22	0 10	0 45	0 48	0 33	0 37	0 29	0 17	0 44	0 31	0 38	0 38	0 34	0 22	0 37	0 31
tig00001299	1106662	A	G	0 57	0 62	0 54	0 21	0 48	0 54	0 50	0 44	0 41	0 59	0 73	0 38	0 49	0 56	0 8	0 18	0 18	0 16	0 24	0 21	0 61	1 47	0 23	0 16	0 17	0 17	0 31	0 19	0 44	0 20	0 26	0 6	0 45	0 49	0 33	0 36	18 11	0 20	0 41	0 33	0 38	0 37	16 17	9 12	0 36	0 31
tig00001299	1106662	A	T	0 57	0 62	0 54	0 21	0 48	0 54	0 50	0 44	0 41	0 59	0 73	0 38	0 49	0 56	0 8	0 18	0 18	0 16	0 24	0 21	0 61	0 47	0 23	0 16	0 17	0 17	0 31	0 19	0 44	19 20	22 26	4 6	0 45	0 49	0 33	0 36	0 11	0 20	0 41	0 33	0 38	0 37	0 17	0 12	0 36	0 31
tig00001299	1106667	CCA	ACG	0 50	0 61	0 46	0 18	0 48	0 53	0 44	0 41	0 38	0 53	0 68	0 37	0 52	0 54	0 8	0 17	0 16	0 16	0 23	0 19	0 55	0 43	0 21	0 16	0 18	0 19	0 32	0 19	0 48	0 34	0 45	0 10	0 42	0 48	0 30	0 35	0 28	0 20	0 36	0 30	0 38	0 33	0 30	0 21	0 35	0 29
tig00001299	1106667	CCAATT	TCGATC	0 50	0 61	0 46	0 18	0 48	0 53	0 44	0 41	0 38	0 53	0 68	0 37	0 52	0 54	0 8	0 17	0 16	0 16	0 23	0 19	0 55	0 43	0 21	0 16	0 18	0 19	0 32	0 19	0 48	0 34	0 45	0 10	0 42	0 48	0 30	0 35	0 28	0 20	0 36	0 30	0 38	0 33	0 30	0 21	0 35	0 29
tig00001299	1106668	CA	TG	0 50	0 61	0 46	0 18	0 48	0 53	0 44	0 41	0 38	0 53	0 68	0 37	0 52	0 54	0 8	0 17	0 16	0 16	0 23	0 19	0 55	0 43	0 21	0 16	0 18	0 19	0 32	0 19	0 48	0 34	0 45	0 10	0 42	0 48	0 30	0 35	0 28	0 20	0 36	0 30	0 38	0 33	0 30	0 21	0 35	0 29
tig00001299	1106669	A	C	0 50	0 61	0 46	0 18	0 48	0 53	0 44	0 41	0 38	0 53	0 68	0 37	0 52	0 54	0 8	0 17	0 16	0 16	0 23	0 19	0 55	0 43	0 21	0 16	0 18	0 19	0 32	0 19	0 48	0 34	0 45	0 10	0 42	0 48	0 30	0 35	0 28	0 20	0 36	0 30	0 38	0 33	0 30	0 21	0 35	0 29
tig00001299	1106677	CT	TG	0 55	0 61	0 55	0 17	0 47	0 53	0 47	0 39	0 43	0 55	0 75	0 42	0 55	0 57	0 7	0 19	0 15	0 18	0 22	0 19	0 56	0 48	0 24	0 17	0 19	0 20	0 34	0 17	0 44	0 38	0 44	0 10	0 47	0 50	0 36	0 36	0 29	0 25	0 37	0 30	0 42	0 32	0 30	0 18	0 38	0 38
tig00001299	1106687	C	A	0 56	0 64	0 50	0 18	0 49	0 53	0 47	0 40	0 43	0 57	0 73	0 41	0 51	0 58	0 7	0 18	0 17	0 16	0 21	0 20	0 59	0 45	0 25	0 20	0 19	0 19	0 33	0 15	0 45	0 44	0 43	0 11	0 47	0 49	0 38	0 39	0 29	0 22	0 43	0 30	0 39	0 29	0 27	0 18	0 39	0 39
tig00001299	1106703	A	T	0 44	0 52	0 47	0 13	0 42	0 47	0 41	0 32	0 38	0 45	0 61	0 33	0 42	0 53	0 6	0 17	0 12	0 13	0 15	0 15	0 46	0 40	0 22	0 19	0 17	0 15	0 28	0 10	0 36	0 37	0 38	0 10	0 43	0 48	1 32	0 41	0 24	0 17	0 44	0 26	0 39	0 29	0 33	0 16	0 42	0 42
tig00001299	1106704	T	C	0 44	0 51	0 47	0 13	0 41	0 46	0 41	0 32	0 36	0 45	0 59	0 33	0 41	0 52	0 6	0 17	0 12	0 13	0 15	0 15	0 46	0 40	0 21	0 19	0 17	0 15	0 28	0 10	0 36	0 37	0 39	0 11	0 44	0 49	0 35	0 41	0 24	6 12	0 42	0 27	0 39	0 28	0 32	0 17	0 42	0 42
tig00001299	1106714	A	T	0 38	0 43	0 39	0 11	0 38	0 39	0 39	0 25	0 34	0 43	0 50	0 30	0 34	0 43	0 6	0 13	0 11	0 12	0 12	0 12	0 46	0 37	0 17	0 15	0 16	0 14	0 24	0 7	0 31	0 41	0 34	0 10	0 40	0 47	0 28	0 43	0 19	0 16	0 42	0 25	0 45	0 29	0 31	0 20	0 43	0 39
tig00001299	1106719	T	A	0 38	0 38	0 36	0 9	0 38	0 37	0 34	0 21	0 31	0 39	0 42	0 27	0 31	0 39	0 6	0 12	0 10	0 11	0 11	0 10	0 42	0 32	0 16	0 12	0 13	0 13	0 24	0 3	0 30	20 19	0 34	0 9	0 42	0 43	0 30	0 42	0 19	0 16	0 38	0 23	0 45	0 28	0 32	0 21	0 43	0 39
tig00001299	1106723	T	C	0 35	0 34	0 36	0 7	0 36	0 33	0 31	0 21	0 28	0 36	0 39	0 23	0 29	0 38	0 6	0 12	0 8	0 11	0 8	0 10	0 40	0 28	0 13	0 11	0 13	0 10	0 21	0 3	0 27	0 39	0 35	0 10	0 41	0 42	0 31	0 45	0 20	0 16	0 42	0 25	0 48	0 29	0 32	0 20	0 42	0 40
tig00001299	1106731	T	C	0 32	0 32	0 32	0 5	0 32	0 31	0 27	0 18	0 28	0 29	0 32	0 21	0 27	0 32	0 6	0 12	0 6	0 10	0 8	0 7	0 37	0 23	0 14	0 11	0 10	0 9	0 19	0 2	0 23	0 36	0 34	0 10	0 37	0 37	0 31	0 43	0 18	0 16	0 37	0 24	0 42	0 30	0 29	0 19	0 39	0 41
tig00001299	1106740	T	G	0 30	0 33	0 27	0 5	0 30	0 27	0 27	0 17	0 25	0 26	0 31	0 18	0 26	0 25	0 2	0 12	0 6	0 8	0 5	0 6	0 31	0 21	0 10	0 10	0 7	0 7	0 14	0 1	0 22	0 40	0 29	0 11	0 41	0 38	0 31	0 43	0 19	0 15	0 41	0 29	0 44	0 31	0 32	0 21	0 41	0 41
tig00001299	1106742	T	C	0 31	0 34	0 25	0 4	0 30	0 28	0 29	0 16	0 24	0 26	0 32	0 19	0 27	0 24	0 2	0 11	0 7	0 8	0 5	0 5	0 33	0 22	0 10	0 9	0 7	0 7	0 14	0 1	0 21	0 37	0 29	0 11	13 29	0 41	0 30	0 43	0 19	0 16	0 40	0 29	0 45	0 30	0 30	0 20	0 41	0 41
tig00001299	1106744	T	C	0 29	0 33	0 26	0 5	0 27	0 27	0 30	0 16	0 24	0 25	0 31	0 20	0 27	0 24	0 2	0 11	0 8	0 8	0 5	0 6	0 34	10 13	0 9	0 9	0 7	0 7	0 15	0 1	0 21	0 37	0 29	0 11	0 42	0 41	0 30	0 41	0 19	0 16	0 39	0 29	0 44	0 30	0 31	0 21	0 42	0 42
tig00001299	1106750	T	C	0 31	0 30	0 21	0 6	0 25	0 25	0 26	0 13	0 25	0 28	0 29	0 18	0 30	0 24	0 2	0 8	0 9	0 7	0 4	0 6	0 31	0 22	0 9	0 9	0 6	0 7	0 18	0 2	0 21	0 35	0 30	0 11	0 42	0 44	0 29	0 42	0 20	0 15	0 39	0 29	0 43	0 33	0 31	0 22	0 41	0 41
tig00001299	1106754	A	G	0 32	0 30	0 19	0 7	0 23	0 27	0 26	0 12	0 24	0 27	0 28	0 21	0 28	0 24	0 2	0 9	0 8	0 7	0 4	0 6	0 30	0 23	0 9	0 10	0 7	0 8	0 19	0 3	0 19	0 34	0 27	0 11	0 42	0 48	0 29	0 42	0 18	0 14	0 40	0 28	0 42	0 33	0 28	0 22	18 23	18 20
tig00001299	1106759	GGA	AGG	0 26	0 24	0 21	0 10	0 21	0 25	0 25	0 11	0 19	0 26	0 28	0 22	0 28	0 22	0 2	0 6	0 7	0 5	0 2	0 7	0 27	0 22	0 8	0 9	0 6	0 9	0 18	0 2	0 17	0 34	0 27	0 11	0 42	0 50	0 32	0 38	0 19	0 15	0 40	0 28	0 44	0 33	0 30	0 22	0 41	0 37
tig00001299	1106766	T	C	0 28	0 26	0 22	0 11	0 19	0 22	0 26	0 12	0 17	0 28	0 31	0 20	0 26	0 17	0 2	0 6	0 8	0 6	0 3	0 8	0 30	0 24	0 7	0 12	0 6	0 10	0 17	0 2	0 21	20 11	0 24	0 14	0 41	0 49	0 33	0 34	0 19	0 15	0 39	0 28	0 49	0 33	0 30	0 22	0 42	0 36
tig00001299	1106774	G	C	0 24	0 23	0 17	0 11	0 17	0 20	0 22	0 11	0 16	0 23	0 25	0 17	0 22	0 14	0 1	0 4	0 8	0 5	0 3	0 9	0 27	0 18	0 6	0 10	0 5	0 9	0 13	0 2	0 20	0 29	0 21	0 14	0 41	0 44	0 33	0 30	0 19	0 15	0 34	0 26	0 48	0 27	0 29	0 21	0 40	0 35
tig00001299	1106779	C	T	0 23	0 20	0 15	0 11	0 11	0 19	0 17	0 9	0 12	0 21	0 20	0 13	0 19	0 13	0 1	0 4	0 7	0 4	0 2	0 9	0 26	0 16	0 4	0 7	0 4	0 7	0 13	0 2	0 18	0 26	0 21	0 14	0 39	0 43	0 32	0 27	0 19	0 15	0 34	0 24	0 44	0 26	0 26	0 20	0 38	0 35
tig00001299	1106795	CTTATTCAATTGCTAATTATCTTATTCAG	GTTATTCAA	0 0	0 0	0 0	0 0	0 0	0 0	0 0	0 0	0 0	0 0	0 0	0 0	0 0	0 0	0 0	0 0	0 0	0 0	0 0	0 0	0 0	0 0	0 0	0 0	0 0	0 0	0 0	0 0	0 0	0 0	0 0	0 0	0 0	0 0	0 0	0 0	5 0	4 0	0 0	0 0	12 0	0 0	11 0	6 0	0 0	0 0
tig00001299	1106799	T	C	0 0	0 0	0 0	0 0	0 0	0 0	0 0	0 0	0 0	0 0	0 0	0 0	0 0	0 0	0 0	0 0	0 0	0 0	0 0	0 0	0 0	0 0	0 0	0 0	0 0	0 0	0 0	0 0	0 0	0 0	0 0	0 0	0 0	0 0	0 0	0 0	0 0	0 0	0 0	0 0	0 0	0 0	0 0	0 0	0 0	0 0
tig00001299	1106803	ATTGCTAATTATCTTATTCAG	A	16 0	14 0	12 0	10 0	8 0	15 0	15 0	7 0	9 0	17 0	16 0	11 0	14 0	10 0	0 0	3 0	6 0	2 0	1 0	7 0	17 0	13 0	3 0	4 0	4 0	7 0	12 0	2 0	15 0	8 0	5 0	3 0	11 0	16 0	14 0	7 0	6 0	0 0	22 0	14 0	19 0	12 0	4 0	3 0	24 0	22 0
tig00001299	1106823	G	A	0 0	0 0	0 0	0 0	0 0	0 0	0 0	0 0	0 0	0 0	0 0	0 0	0 0	0 0	0 0	0 0	0 0	0 0	0 0	0 0	0 0	0 0	0 0	0 0	0 0	0 0	0 0	0 0	0 0	0 0	0 0	0 0	0 0	0 0	0 0	10 0	0 0	0 0	0 0	0 0	0 0	0 0	0 0	0 0	0 0	0 0
tig00001299	1106832	A	T	0 39	0 35	0 35	0 21	0 31	0 46	0 33	0 40	0 24	0 41	0 46	0 24	0 44	0 31	0 3	0 12	0 16	0 15	0 8	0 16	0 37	0 31	0 12	0 19	0 4	0 13	0 22	0 6	0 30	0 30	0 21	0 12	0 20	0 28	0 31	0 27	0 24	0 10	0 37	0 23	0 38	0 27	0 22	0 19	0 35	0 38
tig00001299	1106840	G	A	0 44	0 38	0 41	0 23	0 37	0 50	0 36	0 44	0 25	0 45	0 53	0 27	0 48	0 35	0 5	0 14	0 20	0 16	0 8	0 18	0 41	0 36	0 14	0 19	0 6	0 17	0 25	0 8	0 34	0 35	0 21	0 13	0 22	0 29	0 31	0 28	0 25	0 11	0 39	0 24	0 43	0 27	0 23	0 21	0 35	0 38
tig00001299	1106841	TTA	T	0 44	0 40	0 41	0 23	0 38	0 49	0 36	0 44	0 25	0 47	0 53	0 27	0 49	0 35	0 5	0 13	0 20	0 16	0 8	0 18	0 42	0 36	0 15	0 20	0 6	0 17	0 25	0 8	0 34	0 35	0 23	0 13	0 22	0 29	0 31	14 12	0 25	0 12	0 39	0 24	0 43	0 27	0 23	0 21	0 35	0 38
tig00001299	1106854	A	T	0 50	0 45	0 46	0 23	0 40	0 54	0 41	0 48	0 34	0 55	0 66	0 35	0 53	0 42	0 5	0 18	0 21	0 18	0 10	0 21	0 53	0 43	0 17	0 23	0 7	0 17	0 25	0 10	0 41	0 39	0 25	0 12	0 24	0 33	0 29	0 24	0 21	0 15	0 37	0 29	0 43	0 26	0 21	0 21	0 37	0 36
tig00001299	1106859	G	A	0 48	0 45	0 46	0 22	0 39	0 56	0 39	0 48	0 36	0 58	0 68	0 37	0 54	0 43	0 6	0 18	0 20	0 22	0 14	0 24	0 51	0 44	0 17	0 25	0 6	0 17	0 25	0 11	0 41	15 25	11 14	7 8	0 24	0 32	0 28	0 21	0 23	0 14	0 38	0 28	0 44	0 25	0 21	0 20	0 38	0 36
tig00001299	1106863	TCGAA	GCGAG	0 48	0 44	0 44	0 22	0 38	0 54	0 38	0 49	0 35	0 55	0 66	0 39	0 51	0 39	0 6	0 18	0 17	0 20	0 15	0 23	0 47	0 43	0 18	0 26	0 6	0 17	0 18	0 11	0 41	0 41	0 23	0 14	0 21	0 31	0 30	0 19	0 22	0 15	0 38	0 28	0 45	0 23	0 18	0 20	0 33	0 34
tig00001299	1106878	C	T	0 48	0 57	0 48	0 16	0 40	0 53	0 42	0 54	0 40	0 55	0 67	0 38	0 50	0 42	0 10	0 18	0 19	0 18	0 19	0 26	0 50	0 50	0 19	0 22	0 8	0 15	0 22	0 9	0 39	0 44	0 28	0 11	0 18	0 32	0 32	14 7	0 22	0 14	0 36	0 30	0 45	0 23	0 18	0 20	0 35	0 37
tig00001299	1106879	A	G	0 46	0 57	0 48	0 15	0 40	0 52	0 44	0 53	0 39	0 52	0 65	0 37	0 49	0 42	0 10	0 19	0 18	0 18	0 19	0 24	0 50	0 49	0 20	0 22	0 7	0 15	0 23	0 9	19 16	0 45	0 26	0 12	20 0	31 0	31 0	7 14	21 0	14 0	37 0	26 0	43 0	23 0	19 0	19 0	34 0	37 0
tig00001299	1106879	AGT	GGC	0 46	0 57	0 48	0 15	0 40	0 52	0 44	0 53	0 39	0 52	0 65	0 37	0 49	0 42	0 10	0 19	0 18	0 18	0 19	0 24	0 50	0 49	0 20	0 22	0 7	0 15	0 23	0 9	0 16	0 45	0 26	0 12	0 0	0 0	0 0	0 14	0 0	0 0	0 0	0 0	0 0	0 0	0 0	0 0	0 0	0 0
tig00001299	1106882	G	A	0 49	0 58	0 48	0 15	0 39	0 53	0 44	0 54	0 41	0 52	0 67	0 38	0 49	0 41	0 10	0 18	0 19	0 18	0 18	0 24	0 51	0 48	0 20	0 21	0 8	0 15	0 24	0 9	0 38	0 44	0 28	0 11	0 20	0 31	0 32	0 21	0 23	0 14	0 38	0 29	0 42	0 23	0 19	0 19	0 33	0 37
tig00001299	1106903	C	T	0 59	0 56	0 55	0 12	0 43	0 44	0 51	0 44	0 40	0 57	0 71	0 45	0 54	0 42	0 13	0 17	0 20	0 19	0 18	0 22	0 53	0 56	0 21	0 15	0 8	0 10	0 26	0 12	0 38	0 43	0 34	0 14	0 22	0 33	0 29	0 26	0 27	0 17	0 44	0 29	0 37	0 25	0 22	0 17	0 38	0 33
tig00001299	1106910	C	T	0 57	0 53	0 52	0 12	0 37	0 39	0 51	0 36	0 37	0 53	0 67	0 45	0 47	0 43	0 12	0 16	0 20	0 18	0 17	0 22	0 51	0 55	0 18	0 14	0 10	0 7	0 25	0 11	23 13	0 48	0 37	0 14	20 0	33 0	29 0	9 17	30 0	16 0	44 0	30 0	35 0	24 0	20 0	20 0	37 0	36 0
tig00001299	1106918	T	C	0 52	0 52	0 52	0 11	0 35	0 38	0 49	0 35	0 35	0 53	0 64	0 45	0 44	0 43	0 12	0 13	0 18	0 17	0 17	0 20	0 50	0 51	0 17	0 14	0 10	0 7	0 23	0 10	0 36	0 40	0 32	0 15	0 20	0 32	0 29	0 29	0 30	0 17	0 48	0 30	0 33	0 25	0 21	0 18	0 39	0 37
tig00001299	1106930	A	G	0 49	0 51	0 47	0 9	0 35	0 35	0 48	0 31	0 39	0 53	0 64	0 42	0 41	0 40	0 13	0 14	0 17	0 15	0 19	0 20	0 53	0 51	0 16	0 12	0 12	0 9	0 25	0 9	0 34	0 42	0 35	0 17	0 18	0 27	0 28	0 30	0 24	0 19	0 49	0 35	0 31	0 28	0 19	0 18	0 40	0 37
tig00001299	1106953	A	G	0 41	0 51	0 43	0 11	0 33	0 33	0 49	0 28	0 30	0 46	0 54	0 41	0 37	0 40	0 11	0 10	0 13	6 12	0 19	7 10	0 48	0 45	0 13	0 15	0 9	0 7	0 25	0 11	0 33	0 42	0 41	0 18	0 19	0 28	0 28	0 32	0 24	0 19	0 46	0 32	0 30	0 30	0 20	0 23	0 35	0 32
tig00001299	1106964	G	T	0 38	0 41	0 37	0 9	0 30	0 26	0 42	0 23	0 25	0 34	0 47	0 36	0 31	0 37	0 10	0 8	0 14	0 12	0 13	0 13	0 42	0 36	0 11	0 13	0 8	0 8	0 22	0 10	0 28	0 43	0 38	0 18	0 14	0 30	0 28	0 28	0 22	0 21	0 43	0 32	0 32	0 31	0 17	0 21	0 33	0 27
tig00001299	1106982	T	C	0 28	0 26	0 28	0 9	0 27	0 20	0 29	0 19	0 19	0 33	0 40	0 30	0 26	0 29	0 6	0 8	0 9	0 11	0 11	0 10	0 34	0 30	0 15	0 14	0 5	0 9	0 15	0 10	0 26	0 42	0 35	0 18	0 19	0 33	0 21	0 26	0 21	0 22	0 41	0 35	0 36	0 29	0 23	0 23	0 32	0 27
tig00001299	1107004	T	C	0 17	0 31	0 21	0 15	0 20	0 22	0 26	0 17	0 15	0 30	0 31	0 31	0 25	0 28	0 3	0 12	0 10	0 8	0 10	0 10	0 31	0 22	0 16	0 15	0 6	0 10	0 12	0 6	0 27	0 41	0 40	0 14	0 20	0 29	0 31	0 30	0 25	0 17	0 41	0 31	0 32	0 34	0 28	0 23	0 38	0 33
tig00001299	1107012	T	C	0 21	0 36	0 24	0 16	0 22	0 27	0 27	0 18	0 16	0 34	0 32	0 34	0 27	0 29	0 3	0 13	0 11	0 10	0 11	0 11	0 33	0 26	0 19	0 15	0 6	0 10	0 15	0 7	0 29	0 42	0 42	0 14	0 25	0 28	0 34	0 33	0 25	0 17	0 45	0 31	0 31	0 38	0 26	0 24	0 35	0 32
tig00001299	1107014	A	C	0 23	0 39	0 24	0 17	0 23	0 27	0 27	0 19	0 16	0 34	0 33	0 34	0 28	0 31	0 4	0 14	0 11	0 11	0 11	0 11	0 33	0 26	0 19	0 16	0 6	0 9	0 15	0 7	0 30	0 41	0 43	0 14	0 25	0 26	0 33	0 31	0 25	0 16	0 45	0 31	0 31	0 39	0 27	0 22	0 34	0 32
tig00001299	1107014	A	G	0 23	0 39	0 24	0 17	0 23	0 27	0 27	0 19	0 16	0 34	0 33	0 34	0 28	0 31	0 4	0 14	0 11	0 11	0 11	0 11	0 33	0 26	0 19	0 16	0 6	0 9	0 15	0 7	0 30	0 41	0 43	0 14	0 25	0 26	0 33	0 31	0 25	0 16	0 45	0 31	0 31	0 39	0 27	0 22	0 34	0 32
tig00001299	1107033	A	G	0 22	0 38	0 22	0 19	0 17	0 23	0 28	0 22	0 14	0 34	0 27	0 33	0 23	0 26	0 3	0 14	0 9	0 9	0 8	0 15	0 22	0 23	0 20	0 17	0 6	0 8	0 14	0 8	0 28	0 34	0 45	0 14	0 25	0 28	0 30	0 29	0 27	0 20	0 41	0 29	0 28	0 43	0 28	0 23	0 37	0 31
tig00001299	1107037	C	T	0 20	0 37	0 22	0 20	0 15	0 25	0 26	0 23	0 14	0 35	0 27	0 32	0 22	0 26	0 3	0 15	0 9	0 8	0 8	0 14	0 21	0 21	0 22	0 16	0 6	0 8	0 16	0 6	0 25	0 33	28 13	9 6	0 25	0 27	0 30	0 28	0 26	0 20	0 38	0 31	0 28	0 45	0 27	0 25	0 32	0 26
tig00001299	1107042	T	A	0 0	0 0	0 0	0 0	0 0	0 0	0 0	0 0	0 0	0 0	0 0	0 0	0 0	0 0	0 0	0 0	0 0	0 0	0 0	0 0	0 0	0 0	0 0	0 0	0 0	0 3	0 0	0 0	15 0	32 0	40 0	15 0	25 0	23 0	30 0	27 0	23 0	19 0	33 0	29 0	27 0	40 0	26 0	25 0	31 0	28 0
tig00001299	1107042	T	CA	17 0	29 0	15 0	15 0	12 0	24 0	21 0	19 0	13 0	28 0	22 0	26 0	17 0	19 0	3 0	13 0	6 0	5 0	5 0	12 0	16 0	17 0	20 0	11 0	6 0	3 3	13 0	4 0	7 0	0 0	0 0	0 0	0 0	0 0	0 0	0 0	0 0	0 0	0 0	0 0	0 0	0 0	0 0	0 0	0 0	0 0
tig00001299	1107057	A	C	0 19	0 36	0 19	0 21	0 19	0 24	0 25	0 27	0 19	0 35	0 29	0 30	0 22	0 25	0 3	0 16	4 3	0 5	4 3	9 5	0 26	0 21	25 0	16 0	6 0	0 9	12 6	5 3	0 24	0 28	0 45	0 15	0 19	0 26	0 30	0 27	0 19	0 20	0 29	0 29	0 30	0 41	0 25	0 22	0 32	0 26
tig00001299	1107058	C	T	0 18	0 36	0 19	0 21	0 18	0 26	0 27	0 27	0 20	0 35	0 29	0 30	0 21	0 26	0 3	0 15	0 8	0 5	0 7	0 14	0 26	0 22	0 25	0 17	0 6	0 9	0 18	0 8	0 25	12 16	16 30	6 9	0 19	0 27	0 30	0 27	0 18	0 20	0 29	0 29	0 29	0 41	0 25	0 21	0 31	0 26
tig00001299	1107080	A	T	0 24	0 41	0 25	0 22	0 19	0 34	0 32	0 31	0 28	0 42	0 32	0 35	0 28	0 26	0 3	0 20	0 8	0 11	0 7	0 18	0 31	0 26	0 20	0 20	0 8	0 15	0 22	0 12	0 27	0 24	27 14	8 6	0 21	0 21	0 31	0 27	0 20	0 19	0 24	0 28	0 29	0 38	0 30	0 20	0 37	0 34
tig00001299	1107088	T	C	0 22	0 38	0 23	0 20	0 18	0 32	0 29	0 33	0 27	0 39	0 32	0 33	0 25	0 25	0 4	0 16	0 6	0 11	0 8	0 15	0 30	0 24	0 17	0 17	0 6	0 16	0 21	0 12	0 24	0 14	0 33	0 11	0 22	0 20	0 33	0 27	0 20	0 21	0 26	0 28	0 27	0 34	0 33	0 15	0 40	0 32
tig00001299	1107088	TCA	CCG	0 22	0 38	0 23	0 20	0 18	0 32	0 29	0 33	0 27	0 39	0 32	0 33	0 25	0 25	0 4	0 16	0 6	0 11	0 8	0 15	0 30	0 24	0 17	0 17	0 6	0 16	0 21	0 12	0 24	0 14	0 33	0 11	0 22	0 20	0 33	0 27	0 20	0 21	0 26	0 28	0 27	0 34	0 33	0 15	0 40	0 32
tig00001299	1107090	A	G	0 22	0 38	0 23	0 20	0 18	0 32	0 29	0 33	0 27	0 39	0 32	0 33	0 25	0 25	0 4	0 16	0 6	0 11	0 8	0 15	0 30	0 24	0 17	0 17	0 6	0 16	0 21	0 12	0 24	11 14	0 33	0 11	0 22	0 20	0 33	0 27	0 20	0 21	0 26	0 28	0 27	0 34	0 33	0 15	0 40	0 32
tig00001299	1107097	TTG	T	0 21	0 34	0 20	0 16	0 20	0 33	0 27	0 32	0 27	0 36	0 34	0 34	0 24	0 25	0 5	0 15	0 8	0 13	0 8	0 14	0 28	0 25	0 15	0 18	0 6	0 18	0 20	0 12	0 23	0 24	0 33	0 11	0 24	0 19	0 32	0 26	0 22	0 20	0 25	0 26	0 26	0 35	0 32	0 15	0 41	0 33
tig00001299	1107123	A	G	0 22	0 32	0 22	0 16	0 24	0 28	0 28	0 31	0 27	0 31	0 30	0 35	0 27	0 25	0 5	0 14	0 8	7 5	0 7	7 6	0 27	0 25	0 12	0 17	0 3	8 8	0 18	0 13	0 23	0 27	0 30	0 10	0 28	0 14	0 30	0 27	0 24	0 20	0 26	0 27	0 23	0 33	0 29	0 24	0 45	0 39
tig00001299	1107147	T	C	0 28	0 31	0 25	0 11	0 26	0 25	0 28	0 31	0 22	0 27	0 31	0 34	0 28	0 25	0 6	0 12	0 11	0 14	0 7	0 11	0 30	0 26	0 13	0 16	0 7	0 17	0 18	0 10	0 26	0 26	0 26	0 9	0 26	0 16	0 21	0 21	0 20	0 22	0 22	0 24	0 32	0 35	0 25	0 17	0 46	0 40
tig00001299	1107151	G	A	0 29	0 31	0 27	0 11	0 26	0 26	0 29	0 32	0 20	0 27	0 33	0 34	0 29	0 25	0 6	0 12	0 11	0 14	0 7	0 13	0 33	0 26	0 13	0 16	0 7	0 17	0 17	0 10	0 25	12 14	7 16	3 6	0 26	0 16	0 20	0 21	0 21	0 22	0 20	0 25	0 31	0 33	0 24	0 16	0 44	0 37
tig00001299	1107158	A	C	0 29	0 32	0 29	0 9	0 23	0 27	0 29	0 30	0 20	0 24	0 34	0 37	0 30	1 24	0 7	0 11	0 11	0 14	0 7	0 13	0 31	0 24	0 11	0 13	0 7	0 10	0 17	0 9	0 22	0 25	0 24	0 9	0 27	0 15	0 21	0 16	0 22	0 22	0 22	0 25	0 30	0 32	0 24	0 16	0 47	0 39
tig00001299	1107162	T	A	0 28	0 32	0 29	0 10	0 26	0 25	0 30	0 29	0 21	0 21	0 35	0 36	0 27	0 25	0 6	0 11	0 13	0 12	0 7	0 11	0 34	0 25	0 11	0 13	0 5	0 9	0 19	0 7	0 23	0 24	0 23	0 9	0 26	0 17	0 19	0 16	0 22	0 24	0 21	0 25	0 30	0 30	0 26	0 15	0 47	0 41
tig00001299	1107177	A	T	29 0	31 0	29 0	9 0	28 0	30 0	29 0	28 0	17 0	24 0	41 0	33 0	31 0	26 0	6 0	10 0	14 0	12 0	7 0	14 0	34 0	26 0	14 0	10 0	7 0	6 0	17 0	6 0	21 0	20 0	4 19	2 8	0 27	0 21	0 23	0 19	0 19	0 25	0 32	0 26	0 34	0 23	0 27	0 15	0 47	0 40
tig00001299	1107188	CA	AC	0 30	0 29	0 31	0 10	0 29	0 32	0 33	0 24	0 15	0 25	0 35	0 30	0 33	0 23	0 5	0 8	0 11	0 11	0 7	0 12	0 29	0 25	0 14	0 8	0 8	0 8	0 13	0 6	0 18	0 20	0 21	0 9	0 27	0 20	0 22	0 18	0 19	0 25	0 32	0 27	0 34	0 28	0 26	0 14	0 44	0 40
tig00001299	1107198	G	C	27 0	29 0	28 0	6 0	20 0	28 0	30 0	20 0	12 0	21 0	32 0	8 0	26 0	14 0	4 0	5 0	8 0	7 0	7 0	8 0	25 0	16 0	12 0	4 0	9 0	5 0	11 0	6 0	15 0	11 0	0 0	0 8	26 0	15 0	22 0	7 0	18 0	19 0	28 0	22 0	31 0	25 0	18 0	14 0	32 0	34 0
tig00001299	1107198	GCATG	CCATC	0 0	0 0	0 0	0 0	0 0	0 0	0 0	0 0	0 0	0 0	0 0	16 0	0 0	0 0	0 0	0 0	0 0	0 0	0 0	0 0	0 0	0 0	0 0	0 0	0 0	0 0	0 0	0 0	0 0	0 0	0 0	0 8	0 0	0 0	0 0	0 0	0 0	0 0	0 0	0 0	0 0	0 0	0 0	0 0	0 0	0 0
tig00001299	1107198	GCA	CCC	0 0	0 0	0 0	0 0	0 0	0 0	0 0	0 0	0 0	0 0	0 0	0 0	0 0	0 0	0 0	0 0	0 0	0 0	0 0	0 0	0 0	0 0	0 0	0 0	0 0	0 0	0 0	0 0	0 0	0 0	0 0	0 8	0 0	0 0	0 0	8 0	0 0	0 0	0 0	0 0	0 0	0 0	0 0	0 0	0 0	0 0
tig00001299	1107200	ATGATCGATTAGCCT	A	0 0	0 0	0 0	0 0	0 0	0 0	0 0	0 0	0 0	0 0	0 0	0 0	0 0	0 0	0 0	0 0	0 0	0 0	0 0	0 0	0 0	0 0	0 0	0 0	0 0	0 0	0 0	0 0	0 0	0 0	8 0	0 8	0 0	0 0	0 0	0 0	0 0	0 0	0 0	0 0	0 0	0 0	0 0	0 0	0 0	0 0
tig00001299	1107216	G	C	0 32	0 32	0 32	0 7	0 23	0 29	0 34	0 24	0 16	0 24	0 33	0 25	0 30	0 21	0 5	0 6	0 9	0 9	0 10	0 11	0 27	0 26	0 15	0 5	0 9	0 6	0 11	0 7	0 17	0 25	0 16	0 10	0 30	0 20	0 24	0 20	0 29	0 20	0 32	0 21	0 30	0 30	0 21	0 18	0 36	0 37
tig00001299	1107219	C	G	30 0	28 0	31 0	7 0	20 0	26 0	31 0	22 0	16 0	23 0	33 0	8 15	26 0	21 0	4 0	7 0	9 0	8 0	11 0	9 0	27 0	26 0	16 0	6 0	9 0	6 0	12 0	7 0	6 0	0 23	0 16	0 10	0 0	0 0	0 0	0 0	0 0	0 0	0 0	0 0	0 0	0 0	0 0	0 0	0 0	0 0
tig00001299	1107219	C	T	0 0	0 0	0 0	0 0	0 0	0 0	0 0	0 0	0 0	0 0	0 0	0 15	0 0	0 0	0 0	0 0	0 0	0 0	0 0	0 0	0 0	0 0	0 0	0 0	0 0	0 0	0 0	0 0	0 0	0 23	0 16	0 10	30 0	21 0	22 0	19 0	30 0	19 0	36 0	19 0	28 0	29 0	18 0	18 0	36 0	35 0
tig00001299	1107223	C	A	0 30	0 27	0 32	0 7	0 19	0 26	0 35	0 20	0 16	0 23	0 33	0 23	0 26	0 21	0 4	0 8	0 9	0 8	0 11	0 11	0 28	0 25	0 16	0 7	0 9	0 7	0 11	0 9	0 16	17 8	0 17	0 10	0 31	0 20	0 20	0 19	0 27	0 18	0 35	0 19	0 28	0 27	0 19	0 18	0 34	0 35
tig00001299	1107237	TTTCATTTTAG	CTTCAA	0 19	0 16	0 27	0 8	0 13	0 22	0 30	0 15	0 13	0 20	0 26	0 20	0 22	0 17	0 4	0 10	0 5	0 8	0 8	0 9	0 22	0 18	0 14	0 5	0 5	0 3	0 3	0 12	0 10	7 16	6 11	1 10	0 30	0 21	0 18	0 15	0 25	0 17	0 30	0 24	0 28	0 25	0 18	0 19	0 26	0 35
tig00001299	1107253	TAAAAAAATTAG	ATAAAAAATTAA	0 20	0 16	0 22	0 7	0 9	0 20	0 24	0 16	0 17	0 24	0 22	0 19	0 20	0 18	0 3	0 12	0 3	0 5	0 8	0 8	0 18	0 17	0 14	0 7	0 6	0 2	0 1	0 14	0 9	7 0	6 13	1 10	0 24	0 20	0 17	0 12	0 24	0 13	0 27	0 22	0 21	0 21	0 13	0 13	0 21	0 34
tig00001299	1107259	AATTAG	CATTAA	0 20	0 16	0 22	0 7	0 9	0 20	0 24	0 16	0 17	0 24	0 22	0 19	0 20	0 18	0 3	0 12	0 3	0 5	0 8	0 8	0 18	0 17	0 14	0 7	0 6	0 2	0 1	0 14	0 9	0 0	0 13	0 10	0 24	0 20	0 17	0 12	0 24	0 13	0 27	0 22	0 21	0 21	0 13	0 13	0 21	0 34
tig00001299	1107262	T	G	0 20	0 16	0 22	0 7	0 9	0 20	0 24	0 16	0 17	0 24	0 22	0 19	0 20	0 18	0 3	0 12	0 3	0 5	0 8	0 8	0 18	0 17	0 14	0 7	0 6	0 2	0 1	0 14	0 9	17 0	0 13	0 10	0 24	0 20	0 17	0 12	0 24	0 13	0 27	0 22	0 21	0 21	0 13	0 13	0 21	0 34
tig00001299	1107264	G	C	0 20	0 16	0 22	0 7	0 9	0 20	0 24	0 16	0 17	0 24	0 22	0 19	0 20	0 18	0 3	0 12	0 3	0 5	0 8	0 8	0 18	0 17	0 14	0 7	0 6	0 2	0 1	0 14	0 9	0 0	0 13	0 10	0 24	0 20	0 17	0 12	0 24	0 13	0 27	0 22	0 21	0 21	0 13	0 13	0 21	0 34
tig00001299	1107270	TC	T	9 13	0 18	0 22	4 5	0 8	0 23	0 28	0 15	0 19	0 28	0 24	0 21	0 26	0 21	0 3	0 14	0 4	0 4	0 11	0 6	0 19	0 21	0 15	0 9	0 4	0 2	0 4	0 17	0 5	0 29	0 20	0 12	0 0	0 0	0 0	0 0	0 0	0 0	0 0	0 0	0 0	0 0	0 0	0 0	0 0	0 0
tig00001299	1107271	C	T	0 13	0 18	0 22	0 5	0 8	0 23	0 28	0 15	0 19	0 28	0 24	0 21	0 26	0 21	0 3	0 14	0 4	0 4	0 11	0 6	0 19	0 21	0 15	0 9	0 4	0 2	0 4	0 17	6 5	0 29	0 20	0 12	21 0	19 0	17 0	12 0	22 0	13 0	28 0	21 0	22 0	19 0	14 0	10 0	21 0	36 0
tig00001299	1107276	T	C	0 20	0 16	0 21	0 8	0 8	0 20	0 27	0 13	0 18	0 28	0 18	0 21	0 23	0 20	0 3	0 14	0 3	0 5	0 11	0 6	0 18	0 21	0 15	0 9	0 4	0 2	0 4	0 18	0 11	0 31	0 19	0 12	0 21	0 18	0 15	0 8	0 22	0 10	0 28	0 20	0 17	0 21	0 14	0 11	0 22	0 37
tig00001299	1107277	AT	A	17 0	14 0	14 0	7 0	6 0	15 0	20 0	12 0	13 0	23 0	18 0	17 0	19 0	17 0	3 0	13 0	3 0	5 0	12 0	5 0	18 0	19 0	15 0	9 0	3 0	2 0	4 0	18 0	4 6	0 8	0 17	0 11	0 19	0 17	0 15	0 8	0 22	0 9	0 29	0 20	0 13	0 17	2 12	0 11	0 18	0 35
tig00001299	1107278	T	C	0 0	0 0	0 0	0 0	0 0	0 0	0 0	0 0	0 0	0 0	0 0	0 0	0 0	0 0	0 0	0 0	0 0	0 0	0 0	0 0	0 0	0 0	0 0	0 0	0 0	0 0	0 0	0 0	0 6	19 8	0 17	0 11	0 19	0 17	0 15	0 8	0 22	0 9	0 29	0 20	0 13	0 17	0 12	0 11	0 18	0 35
tig00001299	1107285	T	G	0 0	0 0	0 0	0 0	0 0	0 0	0 0	0 0	0 0	0 0	0 0	0 0	0 0	0 0	0 0	0 0	0 0	0 0	0 0	0 0	0 0	0 0	0 0	0 0	0 0	0 0	0 0	0 0	0 6	0 8	0 17	0 11	0 19	0 17	0 15	0 8	0 22	0 9	0 29	0 20	0 13	0 17	0 12	0 11	0 18	0 35
tig00001299	1107291	CT	C	0 14	0 12	0 13	0 7	0 5	0 15	0 20	0 11	0 15	0 23	0 16	0 23	0 21	0 18	0 2	0 13	0 3	0 6	0 11	0 4	0 16	0 18	0 13	0 9	0 3	0 2	0 5	0 20	0 9	16 7	0 16	0 10	0 21	0 16	0 16	0 9	0 21	0 8	0 29	0 20	0 10	0 20	0 15	0 11	0 13	0 30
tig00001299	1107306	C	G	0 13	0 11	0 10	0 8	0 4	0 14	0 20	0 11	0 11	0 21	0 15	0 5	0 19	0 17	0 1	0 13	0 3	0 5	0 10	0 2	0 14	0 15	0 12	0 8	0 3	0 2	0 5	0 19	0 8	7 17	6 10	3 7	0 22	0 19	0 15	0 9	0 19	0 7	0 24	0 21	0 9	0 17	0 16	0 11	0 10	0 35
tig00001299	1107306	C	T	0 13	0 11	0 10	0 8	0 4	0 14	0 20	0 11	0 11	0 21	0 15	17 5	0 19	0 17	0 1	0 13	0 3	0 5	0 10	0 2	0 14	0 15	0 12	0 8	0 3	0 2	0 5	0 19	0 8	0 17	0 10	0 7	0 22	0 19	0 15	0 9	0 19	0 7	0 24	0 21	0 9	0 17	0 16	0 11	0 10	0 35
tig00001299	1107313	A	C	12 0	10 0	10 0	8 0	3 0	14 0	17 0	10 0	10 0	21 0	13 0	20 0	20 0	17 0	1 0	12 0	3 0	5 0	9 0	1 0	13 0	14 0	13 0	8 0	3 0	1 0	4 0	20 0	1 6	23 0	8 10	3 7	0 19	0 18	0 16	0 9	0 21	0 7	0 23	0 20	0 10	0 16	0 16	0 11	0 9	0 33
tig00001299	1107319	A	C	0 11	0 9	0 9	0 7	0 3	0 13	0 16	0 11	0 10	0 19	0 13	0 20	0 19	0 16	0 1	0 11	0 3	0 4	0 8	0 2	0 13	0 11	0 13	0 8	0 3	0 1	0 4	0 19	0 6	8 17	8 11	3 7	0 18	0 14	0 12	0 9	0 19	0 1	0 26	0 17	0 4	0 17	0 12	0 10	0 8	0 33
tig00001299	1107332	TTCT	CTTTTTTCC	0 10	0 7	0 5	0 5	0 2	0 11	0 7	0 5	0 10	0 17	0 11	0 4	0 16	0 13	0 0	0 7	0 2	0 3	0 6	0 2	0 9	0 9	0 10	0 10	0 3	0 0	0 5	0 14	0 5	0 22	0 15	0 8	0 16	0 14	0 11	0 9	0 17	0 1	0 19	0 16	0 3	0 12	0 12	0 14	0 10	0 29
tig00001299	1107334	C	A	0 10	0 7	0 5	0 5	0 2	0 11	0 7	5 5	0 10	0 17	0 11	0 4	0 16	0 13	0 0	0 7	0 2	0 3	0 6	0 2	0 9	0 9	0 10	0 10	0 3	0 0	0 5	0 14	0 5	0 22	0 15	0 8	0 16	0 14	0 11	0 9	0 17	0 1	0 19	0 16	0 3	0 12	0 12	0 14	0 10	0 29
tig00001299	1107339	T	C	0 10	0 7	0 5	0 5	0 2	0 11	0 7	0 10	0 10	0 17	0 13	0 4	0 15	0 13	0 0	0 7	0 2	0 3	0 6	0 2	0 9	0 9	0 10	0 10	0 3	0 0	0 6	0 13	0 5	0 24	7 8	0 8	0 19	0 14	0 12	0 9	0 17	0 1	0 21	0 16	0 3	0 13	0 15	0 15	0 14	0 32
tig00001299	1107341	C	A	0 10	0 7	0 5	0 5	0 2	0 11	0 7	0 10	0 10	0 16	0 13	0 4	0 15	0 11	0 0	0 7	0 2	0 3	0 6	0 2	0 9	6 3	0 9	0 10	0 4	0 0	0 6	0 13	0 5	0 23	0 15	0 8	0 19	0 15	0 12	0 9	0 16	0 1	0 20	0 16	0 3	0 14	0 14	0 15	0 15	0 32
tig00001299	1107343	C	A	0 10	0 7	0 4	0 5	0 2	0 10	0 6	0 9	0 10	0 15	0 12	0 4	0 15	0 11	0 0	0 7	0 2	0 3	0 5	0 2	0 8	0 9	0 9	0 11	0 4	0 0	0 6	0 12	0 4	0 7	0 14	0 8	0 19	0 14	0 12	0 8	0 17	0 1	0 20	0 16	0 3	0 13	0 15	0 16	1 14	6 25
tig00001299	1107343	C	T	0 10	0 7	0 4	0 5	0 2	0 10	0 6	0 9	0 10	0 15	0 12	0 4	0 15	0 11	0 0	0 7	0 2	0 3	0 5	0 2	0 8	0 9	0 9	0 11	0 4	0 0	0 6	0 12	0 4	16 7	0 14	0 8	0 19	0 14	0 12	0 8	0 17	0 1	0 20	0 16	0 3	0 13	0 15	0 16	0 14	0 25
tig00001299	1107344	G	A	0 8	0 5	0 4	0 5	0 2	0 9	0 6	2 3	5 3	0 14	0 11	0 4	0 11	0 9	0 0	0 5	0 2	0 2	0 5	0 2	0 5	0 8	0 8	0 10	0 3	0 0	0 6	4 8	0 4	0 21	0 13	0 7	0 18	0 15	0 9	0 7	0 16	0 0	0 19	0 16	0 2	0 14	0 13	0 17	0 15	0 29
tig00001299	1107344	GTAA	ATAG	0 8	0 5	0 4	0 5	0 2	0 9	0 6	0 3	0 3	0 14	0 11	0 4	0 11	0 9	0 0	0 5	0 2	0 2	0 5	0 2	0 5	0 8	0 8	0 10	0 3	0 0	0 6	0 8	0 4	0 21	0 13	0 7	0 18	0 15	0 9	0 7	0 16	0 0	0 19	0 16	0 2	0 14	0 13	0 17	0 15	0 29
tig00001299	1107366	TATATATATATATATATATATATAT	AAATTAA	0 0	0 0	0 0	0 0	0 0	0 0	0 0	0 0	0 0	0 0	0 0	0 0	0 0	0 0	0 0	0 0	0 0	0 0	0 0	0 0	0 0	0 0	0 0	0 0	0 0	0 0	0 0	0 0	0 0	0 0	0 0	0 0	3 0	2 0	2 0	2 0	0 0	0 0	5 0	0 0	0 0	1 0	6 0	4 0	6 0	1 0
tig00001299	1107398	T	C	0 0	0 0	0 0	0 0	0 0	2 0	0 0	0 0	0 0	0 0	0 0	0 0	0 0	0 0	0 0	0 0	0 0	0 0	0 0	0 0	0 0	0 0	0 0	0 0	0 0	0 0	0 0	0 0	0 0	0 7	0 12	0 5	0 0	0 0	0 0	0 0	0 0	0 0	0 0	0 0	0 0	0 0	0 0	0 0	0 0	0 0
tig00001299	1107398	T	G	0 0	0 0	0 0	0 0	0 0	0 0	0 0	0 0	0 0	0 0	0 0	0 0	0 0	0 0	0 0	0 0	0 0	0 0	0 0	0 0	0 0	0 0	0 0	0 0	0 0	0 0	0 0	0 0	0 0	0 7	0 12	0 5	9 0	9 0	5 0	8 0	1 0	4 0	9 0	12 0	3 0	11 0	9 0	12 0	9 0	1 0
tig00001299	1107400	G	A	0 0	0 0	0 0	0 0	0 0	0 2	0 0	0 0	0 0	0 0	0 1	0 0	0 0	0 0	0 0	0 0	0 0	0 0	0 0	0 0	0 0	0 0	0 0	0 0	0 0	0 0	0 0	0 0	0 1	0 8	0 12	0 5	0 10	0 9	0 7	0 9	1 0	0 4	0 10	0 12	0 3	0 11	0 9	0 12	0 10	0 1
tig00001299	1107400	GTG	CTA	0 0	0 0	0 0	0 0	0 0	0 2	0 0	0 0	0 0	0 0	0 1	0 0	0 0	0 0	0 0	0 0	0 0	0 0	0 0	0 0	0 0	0 0	0 0	0 0	0 0	0 0	0 0	0 0	0 1	0 8	0 12	0 5	0 10	0 9	0 7	0 9	0 0	0 4	0 10	0 12	0 3	0 11	0 9	0 12	0 10	0 1
tig00001299	1107402	G	A	0 0	0 0	0 0	0 0	0 0	0 2	0 0	0 0	0 0	0 0	0 1	0 0	0 0	0 0	0 0	0 0	0 0	0 0	0 0	0 0	0 0	0 0	0 0	0 0	0 0	0 0	0 0	0 0	0 1	0 8	0 12	0 5	0 10	0 9	0 7	0 9	0 0	0 4	0 10	0 12	0 3	0 11	0 9	0 12	0 10	0 1
tig00001299	1107406	T	C	0 0	0 0	0 0	0 0	0 0	0 2	0 0	0 0	0 0	0 0	0 0	0 0	0 0	0 0	0 0	0 0	0 0	0 0	0 0	0 0	0 0	0 0	0 0	0 0	0 0	0 0	0 0	0 0	0 0	8 0	7 0	1 0	0 0	0 0	0 0	0 0	2 0	0 0	0 0	0 0	0 0	0 0	4 0	5 0	0 0	0 0
tig00001299	1107406	TACTA	CACTG	0 0	0 0	0 0	0 0	0 0	0 2	0 0	0 0	0 0	0 0	1 0	0 0	0 0	0 0	0 0	0 0	0 0	0 0	0 0	0 0	0 0	0 0	0 0	0 0	0 0	0 0	0 0	0 0	0 0	0 0	0 0	0 0	11 0	9 0	8 0	0 0	0 0	6 0	10 0	12 0	3 0	10 0	0 0	7 0	10 0	1 0
tig00001299	1107410	A	G	0 0	0 0	0 0	0 0	0 0	0 2	0 0	0 0	0 0	0 0	0 0	0 0	0 0	0 0	0 0	0 0	0 0	0 0	0 0	0 0	0 0	0 0	0 0	0 0	0 0	0 0	0 0	0 0	0 0	0 0	5 0	4 0	0 0	0 0	0 0	6 0	0 0	0 0	0 0	0 0	0 0	0 0	9 0	0 0	0 0	0 0
tig00001299	1107415	G	A	0 0	0 0	0 0	0 0	0 0	0 0	0 0	0 0	0 0	0 0	0 0	0 0	0 0	0 0	0 0	0 0	0 0	0 0	0 0	0 0	0 1	0 0	0 0	0 0	0 0	0 0	0 0	0 0	0 1	0 0	0 5	0 3	0 0	0 0	0 0	0 4	0 2	0 6	0 0	0 0	0 1	0 8	0 4	0 6	0 0	0 0
tig00001299	1107415	GCGGGCTGC	ACGAGTTGT	0 0	0 0	0 0	0 0	0 0	0 0	0 0	0 0	0 0	0 0	0 0	0 0	0 0	0 0	0 0	0 0	0 0	0 0	0 0	0 0	0 1	0 0	0 0	0 0	0 0	0 0	0 0	0 0	0 1	0 0	0 5	0 3	0 0	0 0	0 0	0 4	0 2	0 6	0 0	0 0	0 1	0 8	0 4	0 6	0 0	0 0
tig00001299	1107415	GCGGGCTGC	ACGGGCTGT	0 0	0 0	0 0	0 0	0 0	0 0	0 0	0 0	0 0	0 0	0 0	0 0	0 0	0 0	0 0	0 0	0 0	0 0	0 0	0 0	0 1	0 0	0 0	0 0	0 0	0 0	0 0	0 0	0 1	0 0	0 5	0 3	0 0	0 0	0 0	0 4	0 2	0 6	0 0	0 0	0 1	0 8	0 4	0 6	0 0	0 0
tig00001299	1107416	CGGGCTG	TGGACTA	0 0	0 0	0 0	0 0	0 0	0 0	0 0	0 0	0 0	0 0	0 0	0 0	0 0	0 0	0 0	0 0	0 0	0 0	0 0	0 0	0 1	0 0	0 0	0 0	0 0	0 0	0 0	0 0	0 1	8 0	7 5	1 3	0 0	0 0	0 0	0 4	0 2	0 6	0 0	0 0	0 1	0 8	0 4	0 6	0 0	0 0
tig00001299	1107420	C	T	0 0	0 0	0 0	0 0	0 0	0 0	0 0	0 0	0 0	0 0	0 0	0 0	0 0	0 0	0 0	0 0	0 0	0 0	0 0	0 0	0 1	0 0	0 0	0 0	0 0	0 0	0 0	0 0	0 1	0 0	0 5	0 3	0 0	0 0	0 0	0 4	0 2	0 6	0 0	0 0	5 1	0 8	0 4	0 6	0 0	0 0
tig00001299	1107420	CTGC	TTGT	0 0	0 0	0 0	0 0	0 0	0 0	0 0	0 0	0 0	0 0	0 0	0 0	0 0	0 0	0 0	0 0	0 0	0 0	0 0	0 0	0 1	0 0	0 0	0 0	0 0	0 0	0 0	0 0	0 1	0 0	0 5	0 3	0 0	0 0	0 0	0 4	0 2	0 6	0 0	0 0	0 1	0 8	0 4	0 6	0 0	0 0
tig00001299	1107422	G	A	0 0	0 0	0 0	0 0	0 0	0 0	0 0	0 0	0 0	0 0	1 0	0 0	0 0	0 0	0 0	0 0	0 0	0 0	0 0	0 0	0 1	0 0	0 0	0 0	0 0	0 0	0 0	0 0	0 1	13 0	0 5	0 3	0 0	0 0	0 0	0 4	0 2	0 6	0 0	0 0	0 1	0 8	0 4	0 6	0 0	0 0
tig00001299	1107423	C	T	0 0	0 0	0 0	0 0	0 0	0 0	0 0	0 0	0 0	0 0	0 0	0 0	0 0	0 0	0 0	0 0	0 0	0 0	0 0	0 0	0 1	0 0	0 0	0 0	0 0	0 0	0 0	0 0	0 1	0 0	0 5	0 3	12 0	9 0	8 0	6 4	0 2	0 6	10 0	13 0	0 1	2 8	11 4	8 6	10 0	2 0
tig00001299	1107428	CAC	TAT	0 10	0 0	0 11	0 0	0 0	0 0	0 0	0 0	0 0	0 0	0 1	0 12	0 0	0 0	0 0	0 0	0 0	0 0	0 0	0 0	0 0	0 0	0 0	0 0	0 0	0 0	0 0	0 0	0 0	0 23	0 8	0 1	0 0	0 0	0 0	0 0	1 0	7 0	0 0	0 0	12 0	8 0	5 0	6 0	0 0	0 0
tig00001299	1107428	CACTGTG	TATTGTA	0 10	0 0	0 11	0 0	0 0	0 0	0 0	0 0	0 0	0 0	0 1	0 12	0 0	0 0	0 0	0 0	0 0	0 0	0 0	0 0	0 0	0 0	0 0	0 0	0 0	0 0	0 0	0 0	0 0	0 23	0 8	0 1	12 0	9 0	11 0	6 0	0 0	0 0	10 0	14 0	0 0	3 0	11 0	9 0	10 0	2 0
tig00001299	1107428	CAC	TGT	0 10	0 0	0 11	0 0	0 0	0 0	0 0	0 0	0 0	0 0	0 1	0 12	0 0	0 0	0 0	0 0	0 0	0 0	0 0	0 0	0 0	0 0	0 0	0 0	0 0	0 0	0 0	0 0	0 0	0 23	0 8	0 1	0 0	0 0	0 0	4 0	0 0	0 0	0 0	0 0	0 0	0 0	0 0	0 0	0 0	0 0
tig00001299	1107430	C	T	0 10	0 0	0 11	0 0	0 0	0 0	0 0	0 0	0 0	0 0	0 1	0 12	0 0	0 0	0 0	0 0	0 0	0 0	0 0	0 0	0 0	0 0	0 0	0 0	0 0	0 0	0 0	0 0	0 0	0 23	0 8	0 1	0 0	0 0	0 0	0 0	0 0	0 0	0 0	0 0	0 0	0 0	0 0	0 0	0 0	0 0
tig00001299	1107431	T	C	0 10	0 0	0 11	0 0	0 0	0 0	0 0	0 0	0 0	0 0	0 1	0 12	0 0	0 0	0 0	0 0	0 0	0 0	0 0	0 0	0 0	0 0	0 0	0 0	0 0	0 0	0 0	0 0	0 0	0 23	11 8	3 1	0 0	0 0	0 0	0 0	0 0	0 0	0 0	0 0	0 0	0 0	0 0	0 0	0 0	0 0
tig00001299	1107439	G	A	0 13	0 0	0 11	0 0	0 0	0 0	0 0	0 0	0 0	0 0	0 1	0 13	0 0	0 0	0 0	0 0	0 0	0 0	0 0	0 0	0 1	0 0	0 0	0 0	0 0	0 0	0 0	0 0	0 0	0 22	0 20	0 4	0 0	0 7	0 1	5 3	1 0	7 0	0 0	0 1	9 0	0 4	5 0	7 1	0 0	0 0
tig00001299	1107439	GC	AT	0 13	0 0	0 11	0 0	0 0	0 0	0 0	0 0	0 0	0 0	0 1	0 13	0 0	0 0	0 0	0 0	0 0	0 0	0 0	0 0	0 1	0 0	0 0	0 0	0 0	0 0	0 0	0 0	0 0	0 22	0 20	0 4	12 0	9 7	11 1	6 3	0 0	0 0	10 0	14 1	5 0	11 4	11 0	9 1	11 0	2 0
tig00001299	1107444	GTACTACACTGTGAATGTATTG	ATAGATGTATTA	0 0	0 0	0 0	0 0	0 0	0 0	0 0	0 0	0 0	0 0	0 0	0 0	0 0	0 0	0 0	0 0	0 0	0 0	0 0	0 0	0 0	0 0	0 0	0 0	0 0	0 0	0 0	0 0	0 0	0 0	0 0	0 0	0 0	0 0	0 0	0 0	0 0	0 0	0 0	0 0	0 0	0 0	0 0	0 0	0 0	0 0
tig00001299	1107446	ACTACACTGTGAATG	GCTACACTATGAATA	11 0	0 0	10 0	0 0	0 0	0 0	0 0	0 0	0 0	0 0	0 0	11 0	0 0	0 0	0 0	0 0	0 0	0 0	0 0	0 0	1 0	0 0	0 0	0 0	0 0	0 0	0 0	0 0	0 0	0 0	0 0	0 0	0 0	0 0	0 0	0 0	0 0	0 0	0 0	0 0	0 0	0 0	0 0	0 0	0 0	0 0
tig00001299	1107449	A	G	0 0	0 0	0 0	0 0	0 0	0 0	0 0	0 0	0 0	0 0	0 0	0 0	0 0	0 0	0 0	0 0	0 0	0 0	0 0	0 0	0 0	0 0	0 0	0 0	0 0	0 0	0 0	0 0	0 0	0 0	0 0	0 0	0 0	0 0	0 0	0 0	0 0	0 0	0 0	0 0	0 0	0 0	0 0	0 0	0 0	0 0
tig00001299	1107449	ACACTGTGAATG	GCACTGTAAATA	0 0	0 0	0 0	0 0	0 0	0 0	0 0	0 0	0 0	0 0	0 0	0 0	0 0	0 0	0 0	0 0	0 0	0 0	0 0	0 0	0 0	0 0	0 0	0 0	0 0	0 0	0 0	0 0	0 0	0 0	0 0	0 0	0 0	0 0	0 0	0 0	0 0	0 0	0 0	0 0	0 0	0 0	0 0	0 0	0 0	0 0
tig00001299	1107449	ACACTGTGAATGTATTGTG	GCACTGTGAATATATTGTA	0 0	0 0	0 0	0 0	0 0	0 0	0 0	0 0	0 0	0 0	0 0	0 0	0 0	0 0	0 0	0 0	0 0	0 0	0 0	0 0	0 0	0 0	0 0	0 0	0 0	0 0	0 0	0 0	0 0	0 0	0 0	0 0	0 0	0 0	0 0	0 0	0 0	0 0	0 0	0 0	0 0	0 0	0 0	0 0	0 0	0 0
tig00001299	1107449	ACACTGTGAATGTATTGTG	GCACTGTGAATGTATTGTA	0 0	0 0	0 0	0 0	0 0	0 0	0 0	0 0	0 0	0 0	0 0	0 0	0 0	0 0	0 0	0 0	0 0	0 0	0 0	0 0	0 0	0 0	0 0	0 0	0 0	0 0	0 0	0 0	0 0	0 0	0 0	0 0	0 0	0 0	0 0	0 0	0 0	0 0	0 0	0 0	0 0	0 0	0 0	0 0	0 0	0 0
tig00001299	1107449	ACACTGTGAATGTATTGTG	GCACTGTGGATGCATTGTT	0 0	0 0	0 0	0 0	0 0	0 0	0 0	0 0	0 0	0 0	0 0	0 0	0 0	0 0	0 0	0 0	0 0	0 0	0 0	0 0	0 0	0 0	0 0	0 0	0 0	0 0	0 0	0 0	0 0	0 0	0 0	0 0	0 0	0 0	0 0	5 0	0 0	0 0	0 0	0 0	0 0	0 0	0 0	0 0	0 0	0 0
tig00001299	1107449	ACACTGTGAATGTA	GCACTGTGGATGCG	0 0	0 0	0 0	0 0	0 0	0 0	0 0	0 0	0 0	0 0	0 0	0 0	0 0	0 0	0 0	0 0	0 0	0 0	0 0	0 0	0 0	0 0	0 0	0 0	0 0	0 0	0 0	0 0	0 0	0 0	11 0	1 0	0 0	0 0	0 0	0 0	0 0	0 0	0 0	0 0	0 0	0 0	0 0	0 0	0 0	0 0
tig00001299	1107449	ACACTGTGAATGTATTGTG	GCACTGTGGATGTATTATT	0 0	0 0	0 0	0 0	0 0	0 0	0 0	0 0	0 0	0 0	0 0	0 0	0 0	0 0	0 0	0 0	0 0	0 0	0 0	0 0	0 0	0 0	0 0	0 0	0 0	0 0	0 0	0 0	0 0	0 0	0 0	0 0	0 0	0 0	0 0	0 0	1 0	5 0	0 0	0 0	9 0	0 0	5 0	7 0	0 0	0 0
tig00001299	1107449	ACACTGTGAATGTATTGTG	GCACTGTGGATGTATTGTT	0 0	0 0	0 0	0 0	0 0	0 0	0 0	0 0	0 0	0 0	0 0	0 0	0 0	0 0	0 0	0 0	0 0	0 0	0 0	0 0	0 0	0 0	0 0	0 0	0 0	0 0	0 0	0 0	0 0	0 0	0 0	0 0	0 0	0 0	0 0	0 0	0 0	0 0	0 0	0 0	0 0	0 0	0 0	0 0	0 0	0 0
tig00001299	1107449	ACACTGTGAATGTATTGTG	GCACTTTAAATGTATTGTT	0 0	0 0	0 0	0 0	0 0	0 0	0 0	0 0	0 0	0 0	0 0	0 0	0 0	0 0	0 0	0 0	0 0	0 0	0 0	0 0	0 0	0 0	0 0	0 0	0 0	0 0	0 0	0 0	0 0	0 0	0 0	0 0	0 0	0 0	0 0	0 0	0 0	0 0	0 0	0 0	8 0	8 0	0 0	0 0	0 0	0 0
tig00001299	1107449	AC	GT	0 0	0 0	0 0	0 0	0 0	0 0	0 0	0 0	0 0	0 0	0 0	0 0	0 0	0 0	0 0	0 0	0 0	0 0	0 0	0 0	0 0	0 0	0 0	0 0	0 0	0 0	0 0	0 0	0 0	0 0	0 0	0 0	0 0	0 0	0 0	0 0	0 0	0 0	0 0	0 0	0 0	0 0	0 0	0 0	0 0	0 0
tig00001299	1107449	ACACTGTGAATGTATTGTG	GTACTGTGGATGTATTGTT	0 0	0 0	0 0	0 0	0 0	0 0	0 0	0 0	0 0	0 0	0 0	0 0	0 0	0 0	0 0	0 0	0 0	0 0	0 0	0 0	0 0	0 0	0 0	0 0	0 0	0 0	0 0	0 0	0 0	0 0	0 0	0 0	12 0	12 0	11 0	9 0	0 0	0 0	10 0	14 0	0 0	4 0	10 0	9 0	11 0	2 0
tig00001299	1107471	G	A	0 10	0 2	0 9	0 0	0 0	0 0	0 0	0 0	0 0	0 1	0 0	0 12	0 2	0 2	0 0	0 0	0 1	0 0	0 0	0 3	0 1	0 0	0 0	0 0	0 0	0 1	0 1	0 0	0 6	0 0	0 25	0 1	0 18	0 30	0 16	0 20	0 6	0 14	0 22	0 31	0 22	0 21	0 27	0 22	5 17	4 2
tig00001299	1107476	TAT	CAC	0 0	0 2	0 0	0 0	0 0	0 0	0 0	0 0	0 0	0 1	0 0	0 1	0 2	0 2	0 0	0 0	0 1	0 0	0 0	0 0	0 0	0 0	0 0	0 0	0 0	0 0	0 1	0 0	0 0	0 0	0 14	0 0	0 18	0 27	0 14	0 8	0 3	0 0	0 22	0 26	0 0	0 6	0 15	0 13	0 21	0 7
tig00001299	1107476	TATTA	CATTG	0 0	0 2	0 0	0 0	0 0	0 0	0 0	0 0	0 0	0 1	0 0	0 1	0 2	0 2	0 0	0 0	0 1	0 0	0 0	3 0	0 0	0 0	0 0	0 0	0 0	1 0	0 1	0 0	4 0	0 0	0 14	0 0	0 18	1 27	0 14	7 8	0 3	1 0	3 22	2 26	1 0	0 6	3 15	1 13	1 21	0 7
tig00001299	1107480	A	G	0 0	0 2	0 0	0 0	0 0	0 0	0 0	0 0	0 0	0 1	0 0	0 1	0 2	0 2	0 0	0 0	0 1	0 0	0 0	0 0	0 0	0 0	0 0	0 0	0 0	0 0	0 1	0 0	0 0	0 0	0 14	0 0	0 18	0 27	0 14	0 8	3 3	13 0	0 22	0 26	21 0	8 6	7 15	7 13	0 21	0 7
tig00001299	1107485	C	T	0 0	0 2	0 1	0 0	0 0	0 0	0 0	0 0	0 0	0 1	0 0	0 1	0 2	0 2	0 0	0 0	0 1	0 0	0 0	0 5	0 0	0 0	0 0	0 0	0 0	0 1	0 1	0 0	0 5	0 0	0 18	0 3	0 20	0 28	0 16	8 9	0 7	0 14	0 33	0 31	0 21	0 16	0 29	0 21	0 23	0 10
tig00001299	1107488	C	T	0 0	0 0	0 0	0 0	0 0	0 0	0 0	0 0	0 0	0 0	0 0	0 0	0 0	0 0	0 0	0 0	0 0	0 0	0 0	0 0	0 0	0 0	0 0	0 0	0 0	0 0	0 0	0 0	0 0	0 0	5 0	1 2	0 20	0 27	0 16	0 17	0 7	0 14	0 30	0 32	0 21	0 15	0 32	0 19	0 22	0 9
tig00001299	1107488	CACTA	TACTG	0 0	0 0	0 0	0 0	0 0	0 0	0 0	0 0	0 0	0 0	0 0	0 0	0 0	0 0	0 0	0 0	0 0	0 0	0 0	0 0	0 0	0 0	0 0	0 0	0 0	0 0	0 0	0 0	0 0	0 0	0 0	0 2	0 20	0 27	0 16	0 17	0 7	0 14	0 30	0 32	0 21	0 15	0 32	0 19	0 22	0 9
tig00001299	1107492	A	G	0 0	0 0	1 0	0 0	0 0	0 0	0 0	0 0	0 0	0 0	0 0	0 0	0 0	0 0	0 0	0 0	0 0	0 0	0 0	5 0	0 0	0 0	0 0	0 0	0 0	1 0	0 0	0 0	0 0	0 0	0 0	0 2	0 20	0 27	0 16	0 17	0 7	0 14	0 30	0 32	1 21	0 15	0 32	0 19	0 22	0 9
tig00001299	1107495	GCATGGGTAC	ACATGAATAT	0 0	0 0	0 0	0 0	0 0	0 0	0 0	0 0	0 0	0 0	0 0	0 0	0 0	0 0	0 0	0 0	0 0	0 0	0 0	0 0	0 0	0 0	0 0	0 0	0 0	0 0	0 0	0 0	0 0	0 0	0 0	2 0	0 0	0 0	0 0	0 0	0 0	0 0	0 0	0 0	0 0	0 0	0 0	0 0	0 0	0 0
tig00001299	1107495	GCAT	ATAC	0 0	0 0	0 0	0 0	0 0	0 0	0 0	0 0	0 0	0 0	0 0	0 0	0 0	0 0	0 0	0 0	0 0	0 0	0 0	0 0	0 0	0 0	0 0	0 0	0 0	0 0	0 0	0 0	0 0	0 0	0 0	0 0	0 0	0 0	0 0	8 0	0 0	0 0	0 0	0 0	0 0	0 0	11 0	4 0	0 0	0 0
tig00001299	1107495	GCATGGG	ATACGGA	0 0	0 0	0 0	0 0	0 0	0 0	0 0	0 0	0 0	0 0	0 0	0 0	0 0	0 0	0 0	0 0	0 0	0 0	0 0	0 0	0 0	0 0	0 0	0 0	0 0	0 0	0 0	0 0	0 0	0 0	0 0	0 0	0 0	0 0	0 0	0 0	4 0	0 0	0 0	0 0	0 0	0 0	0 0	0 0	0 0	0 0
tig00001299	1107495	GCA	ATG	0 0	0 0	0 0	0 0	0 0	0 0	0 0	0 0	0 0	0 0	0 0	0 0	0 0	0 0	0 0	0 0	0 0	0 0	0 0	0 0	0 0	0 0	0 0	0 0	0 0	0 0	0 0	0 0	0 0	0 0	0 0	0 0	0 0	0 0	0 0	0 0	0 0	0 0	0 0	0 0	11 0	8 0	0 0	0 0	0 0	0 0
tig00001299	1107495	GCAT	ATGC	0 0	0 0	0 0	0 0	0 0	0 0	0 0	0 0	0 0	0 0	0 0	0 0	0 0	0 0	0 0	0 0	0 0	0 0	0 0	0 0	0 0	0 0	0 0	0 0	0 0	0 0	0 0	0 0	4 0	0 0	0 0	0 0	13 0	23 0	11 0	4 0	3 0	12 0	22 0	27 0	9 0	5 0	11 0	8 0	16 0	9 0
tig00001299	1107497	AT	GC	0 0	0 0	1 0	0 0	0 0	0 0	0 0	0 0	0 0	0 0	0 0	0 0	0 0	0 0	0 0	0 0	0 0	0 0	0 0	6 0	0 0	0 0	0 0	0 0	0 0	1 0	0 0	0 0	0 0	0 0	0 0	0 0	0 0	0 0	0 0	0 0	0 0	0 0	0 0	0 0	0 0	0 0	0 0	0 0	0 0	0 0
tig00001299	1107497	ATG	GCA	0 0	0 0	0 0	0 0	0 0	0 0	0 0	0 0	0 0	0 0	0 0	0 0	0 0	0 0	0 0	0 0	0 0	0 0	0 0	0 0	0 0	0 0	0 0	0 0	0 0	0 0	0 0	0 0	0 0	0 0	5 0	1 0	0 0	0 0	0 0	0 0	0 0	0 0	0 0	0 0	0 0	0 0	0 0	0 0	0 0	0 0
tig00001299	1107498	T	C	0 0	0 0	0 0	0 0	0 0	0 0	0 0	0 0	0 0	0 0	0 0	0 0	0 0	0 0	0 0	0 0	0 0	0 0	0 0	0 0	0 0	0 0	0 0	0 0	0 0	0 0	0 0	0 0	0 0	0 0	0 0	0 0	0 0	0 0	0 0	0 0	0 0	0 0	0 0	0 0	0 0	0 0	0 0	0 0	0 0	0 0
tig00001299	1107498	TGG	CGA	0 0	0 0	0 0	0 0	0 0	0 0	0 0	0 0	0 0	0 0	0 0	0 0	0 0	0 0	0 0	0 0	0 0	0 0	0 0	0 0	0 0	0 0	0 0	0 0	0 0	0 0	0 0	0 0	0 0	0 0	0 0	0 0	0 0	0 0	0 0	0 0	0 0	0 0	0 0	0 0	0 0	0 0	0 0	0 0	0 0	0 0
tig00001299	1107499	G	A	0 0	0 0	0 0	0 0	0 0	0 0	0 0	0 0	0 0	0 0	0 0	0 0	0 0	0 0	0 0	0 0	0 0	0 0	0 0	0 0	0 0	0 0	0 0	0 0	0 0	0 0	0 0	0 0	0 0	0 0	0 0	0 0	0 0	0 0	0 0	0 0	0 0	0 0	0 0	0 0	0 0	0 0	0 0	0 0	0 0	0 0
tig00001299	1107505	T	A	0 1	0 0	0 1	0 0	0 0	0 0	0 0	0 0	0 0	0 0	0 0	0 0	0 0	0 0	0 0	0 0	0 0	0 2	0 0	0 9	0 0	0 0	0 0	0 0	0 0	0 1	0 0	0 0	0 8	0 7	0 8	0 3	0 18	0 28	0 16	0 19	0 8	0 15	0 39	0 36	0 21	0 14	0 30	0 15	0 18	0 11
tig00001299	1107509	T	C	1 0	0 0	0 0	0 0	0 0	0 0	0 0	0 0	0 0	0 0	0 0	0 0	0 0	0 0	0 0	0 0	0 0	0 0	0 0	0 0	0 0	0 0	0 0	0 0	0 0	0 0	0 0	0 0	8 0	5 0	8 0	3 0	19 0	28 0	16 0	22 0	8 0	17 0	38 0	35 0	23 0	14 0	29 0	15 0	18 0	12 0
tig00001299	1107509	TACTG	CACTA	0 0	0 0	1 0	0 0	0 0	0 0	0 0	0 0	0 0	0 0	0 0	0 0	0 0	0 0	0 0	0 0	0 0	2 0	0 0	9 0	0 0	0 0	0 0	0 0	0 0	1 0	0 0	0 0	0 0	0 0	0 0	0 0	0 0	0 0	0 0	0 0	0 0	0 0	0 0	0 0	0 0	0 0	0 0	0 0	0 0	0 0
tig00001299	1107515	G	A	0 14	0 0	0 1	0 0	0 0	0 0	0 0	0 0	0 0	0 2	0 3	0 4	0 0	0 5	0 0	0 0	0 0	0 2	0 0	0 9	0 5	0 2	0 0	0 0	0 0	0 1	0 0	0 0	0 9	7 0	0 9	0 4	2 17	1 28	2 17	1 21	0 8	1 17	7 33	4 31	1 29	1 13	5 26	1 16	1 20	0 12
tig00001299	1107515	G	C	0 14	0 0	0 1	0 0	0 0	0 0	0 0	0 0	0 0	0 2	0 3	0 4	0 0	0 5	0 0	0 0	0 0	0 2	0 0	0 9	0 5	0 2	0 0	0 0	0 0	0 1	0 0	0 0	0 9	0 0	0 9	0 4	0 17	0 28	0 17	0 21	8 8	0 17	0 33	0 31	0 29	0 13	0 26	0 16	0 20	0 12
tig00001299	1107523	GC	ACACAGTGGATTGT	0 0	0 0	0 1	0 0	0 0	0 0	0 0	0 0	0 0	0 0	0 0	0 0	0 0	0 0	0 0	0 0	0 0	0 2	0 0	0 9	0 0	0 0	0 0	0 0	0 0	0 1	0 0	0 0	0 9	0 7	0 0	0 1	2 12	0 27	2 14	1 19	0 7	0 16	5 34	1 27	0 22	1 7	0 24	0 17	0 20	0 13
tig00001299	1107526	C	T	0 0	0 0	0 1	0 0	0 0	0 0	0 0	0 0	0 0	0 0	0 0	0 0	0 0	0 0	0 0	0 0	0 0	0 2	0 0	0 9	0 0	0 0	0 0	0 0	0 0	0 1	0 0	0 0	0 9	0 7	0 0	3 1	0 12	0 27	0 14	0 19	0 7	0 16	0 34	0 27	0 22	0 7	0 24	0 17	0 20	0 13
tig00001299	1107529	T	C	0 18	0 3	0 6	0 4	0 4	0 1	0 5	0 6	0 5	0 11	0 8	2 16	0 10	0 11	1 0	0 3	0 4	0 4	0 2	0 11	0 8	6 5	0 3	0 5	0 5	0 1	0 2	0 9	0 11	0 10	0 7	0 4	0 26	0 48	0 31	0 30	0 22	0 29	0 51	0 46	0 45	0 20	0 43	0 33	0 34	0 30
tig00001299	1107532	G	A	3 15	3 0	6 0	2 2	4 0	1 0	4 0	3 3	4 1	10 2	5 3	2 18	10 0	6 5	0 1	3 0	4 0	1 3	2 0	2 9	3 5	1 9	3 0	5 0	5 0	0 1	2 0	4 4	2 9	0 0	0 4	0 4	0 27	0 48	0 32	0 32	0 23	0 30	0 54	0 42	0 46	0 20	0 42	0 33	0 35	0 31
tig00001299	1107532	GTG	ATT	0 15	0 0	0 0	0 2	0 0	0 0	1 0	0 3	0 1	0 2	0 3	0 18	0 0	0 5	0 1	0 0	0 0	0 3	0 0	0 9	0 5	0 9	0 0	0 0	0 0	0 1	0 0	0 4	0 9	0 0	0 4	0 4	0 27	0 48	0 32	0 32	0 23	0 30	0 54	0 42	0 46	0 20	0 42	0 33	0 35	0 31
tig00001299	1107536	G	A	0 18	0 3	0 6	0 4	0 4	0 1	0 5	4 3	1 4	0 12	0 8	0 23	0 11	0 11	0 2	0 3	0 4	0 4	0 2	0 12	0 8	0 12	0 3	0 5	0 5	0 1	0 3	6 7	0 11	0 3	0 5	0 4	0 28	0 49	0 32	0 32	0 23	0 29	0 53	0 43	0 47	0 20	0 42	0 33	0 36	0 31
tig00001299	1107537	G	T	5 5	0 3	0 6	0 4	0 4	0 1	0 5	0 7	0 5	1 10	1 5	0 19	0 11	3 6	0 2	0 3	0 4	0 4	0 2	0 12	1 3	1 10	0 3	0 5	0 5	0 1	0 3	0 13	0 11	0 0	0 5	3 1	0 28	0 50	1 29	0 32	8 15	0 30	0 54	0 43	0 40	0 21	0 42	0 31	0 38	0 31
tig00001299	1107541	T	C	0 18	0 3	0 7	0 4	0 4	0 1	0 5	0 7	0 5	0 12	0 8	0 23	0 12	0 13	0 2	0 3	0 4	0 4	0 2	0 12	0 8	0 12	0 3	0 5	0 5	0 1	0 3	0 14	0 11	0 3	6 0	1 3	0 27	0 49	0 30	0 30	0 22	0 28	0 50	0 43	0 46	0 19	0 42	0 27	0 37	0 31
tig00001299	1107544	AGGGAGGTTGCAGCCTG	GAGGAGGCTGCAAGGTA	0 0	0 0	0 0	0 0	0 0	0 0	0 0	0 0	0 0	0 0	0 0	0 0	0 0	0 0	0 0	0 0	0 0	0 0	0 0	0 0	0 0	0 0	0 0	0 0	0 0	0 0	0 0	0 0	0 0	0 0	0 0	0 0	0 0	0 0	0 0	0 0	0 0	0 0	0 0	0 0	0 0	0 0	0 0	0 0	0 0	0 0
tig00001299	1107544	AGGGAGGTTGCAGCCTGC	GGAGAGGTTGCAACCTGT	0 0	0 0	0 0	0 0	0 0	0 0	0 0	0 0	0 0	0 0	0 0	0 0	0 0	0 0	0 0	0 0	0 0	0 0	0 0	0 0	0 0	0 0	0 0	0 0	0 0	0 0	0 0	0 0	0 0	0 0	0 0	0 0	13 0	9 0	8 0	11 0	0 0	0 0	14 0	6 0	3 0	11 0	0 0	5 0	0 0	0 0
tig00001299	1107544	AGGGAGGTTGCAGCCTGC	GGGGAGGCTGCAAGCTAT	5 0	0 0	0 0	0 0	0 0	0 0	0 0	0 0	0 0	1 0	1 0	0 0	0 0	3 0	0 0	0 0	0 0	0 0	0 0	0 0	1 0	1 0	0 0	0 0	0 0	0 0	0 0	0 0	0 0	0 0	0 0	0 0	0 0	0 0	0 0	0 0	8 0	0 0	0 0	0 0	7 0	0 0	0 0	0 0	0 0	0 0
tig00001299	1107544	AGGGAGGTTGCAGCCTGC	GGGGAGGTTGCAACCTGT	0 0	0 0	0 0	0 0	0 0	0 0	0 0	0 0	0 0	0 0	0 0	0 0	0 0	0 0	0 0	0 0	0 0	0 0	0 0	0 0	0 0	0 0	0 0	0 0	0 0	0 0	0 0	0 0	0 0	0 0	0 0	0 0	0 0	0 0	4 0	0 0	1 0	0 0	0 0	0 0	9 0	0 0	0 0	9 0	9 0	4 0
tig00001299	1107545	GGGAGGTTGCAGCC	TGGAGGTTGCAGCT	0 0	0 0	0 0	0 0	0 0	0 0	0 0	0 0	0 0	0 0	0 0	0 0	0 0	0 0	0 0	0 0	0 0	0 0	0 0	0 0	0 0	0 0	0 0	0 0	0 0	0 0	0 0	0 0	0 0	0 0	0 0	0 0	0 0	0 0	0 0	0 0	0 0	0 0	0 0	0 0	0 0	0 0	0 0	0 0	0 0	0 0
tig00001299	1107546	GGAGGT	AGAGGC	0 0	0 0	0 0	0 0	0 0	0 0	0 0	0 0	0 0	0 0	0 0	0 0	0 0	0 0	0 0	0 0	0 0	0 0	0 0	0 0	0 0	0 0	0 0	0 0	0 0	0 0	0 0	0 0	6 0	0 0	0 0	0 0	13 0	27 0	13 0	19 0	11 0	16 0	33 0	23 0	28 0	9 0	18 0	12 0	15 0	15 0
tig00001299	1107546	GGAGGTTGC	AGAGGCTGT	0 0	0 0	0 0	0 0	0 0	0 0	0 0	4 0	1 0	0 0	0 0	0 0	0 0	0 0	0 0	0 0	0 0	0 0	0 0	0 0	0 0	0 0	0 0	0 0	0 0	0 0	0 0	6 0	0 0	0 0	0 0	0 0	0 0	0 0	0 0	0 0	0 0	0 0	0 0	0 0	0 0	0 0	0 0	0 0	0 0	0 0
tig00001299	1107551	T	C	0 0	0 0	0 0	0 0	0 0	0 0	0 0	0 0	0 0	0 0	0 0	0 0	0 0	0 0	0 0	0 0	0 0	0 0	0 0	0 0	0 0	0 0	0 0	0 0	0 0	0 0	0 0	0 0	0 0	0 0	4 0	1 0	0 0	0 0	0 0	0 0	0 0	0 0	0 0	0 0	0 0	0 0	0 0	0 0	0 0	0 0
tig00001299	1107551	TTGCAGCCTG	CTACAGCCTA	0 0	0 0	0 0	0 0	0 0	0 0	0 0	0 0	0 0	0 0	0 0	0 0	0 0	0 0	0 0	0 0	0 0	0 0	0 0	0 0	0 0	0 0	0 0	0 0	0 0	0 0	0 0	0 0	0 0	3 0	0 0	0 0	0 0	0 0	0 0	0 0	0 0	0 0	0 0	0 0	0 0	0 0	0 0	0 0	0 0	0 0
tig00001299	1107551	TTGCAGCCTG	CTGCAAGCTA	0 0	0 0	0 0	0 0	0 0	0 0	0 0	0 0	0 0	0 0	0 0	0 0	0 0	0 0	0 0	0 0	0 0	0 0	0 0	0 0	0 0	0 0	0 0	0 0	0 0	0 0	0 0	0 0	0 0	0 0	0 0	3 0	0 0	0 0	0 0	0 0	0 0	0 0	0 0	0 0	0 0	0 0	0 0	0 0	0 0	0 0
tig00001299	1107551	TTGC	CTGT	4 0	3 0	7 0	4 0	4 0	1 0	5 0	3 0	4 0	11 0	5 0	12 0	12 0	8 0	1 0	3 0	4 0	1 0	2 0	3 0	3 0	4 0	3 0	5 0	5 0	0 0	3 0	6 0	2 0	0 0	0 0	0 0	0 0	0 0	0 0	0 0	0 0	0 0	0 0	0 0	0 0	0 0	0 0	0 0	0 0	0 0
tig00001299	1107551	TTGCAGC	CTGTAGT	0 0	0 0	0 0	0 0	0 0	0 0	0 0	0 0	0 0	0 0	0 0	0 0	0 0	0 0	0 0	0 0	0 0	3 0	0 0	7 0	0 0	0 0	0 0	0 0	0 0	0 0	0 0	0 0	0 0	0 0	0 0	0 0	0 0	0 0	0 0	0 0	0 0	0 0	0 0	0 0	0 0	0 0	0 0	0 0	0 0	0 0
tig00001299	1107556	GCCTGC	ACCTAT	0 0	0 0	0 0	0 0	0 0	0 0	0 0	0 0	0 0	0 0	0 0	0 0	0 0	0 0	0 0	0 0	0 0	0 0	0 0	0 0	0 0	0 0	0 0	0 0	0 0	0 0	0 0	0 0	0 0	0 0	0 0	0 0	0 0	0 0	0 0	0 0	0 0	7 0	0 0	0 0	0 0	0 0	8 0	0 0	0 0	0 0
tig00001299	1107556	GCCTGC	ACCTGT	0 0	0 0	0 0	0 0	0 0	0 0	0 0	0 0	0 0	0 0	0 0	0 0	0 0	0 0	0 0	0 0	0 0	0 0	0 0	0 0	0 0	0 0	0 0	0 0	0 0	0 0	0 0	0 0	0 0	0 0	0 0	0 0	0 0	12 0	0 0	0 0	3 0	3 0	0 0	0 0	0 0	0 0	0 0	0 0	0 0	0 0
tig00001299	1107562	AG	A	0 17	0 4	0 7	0 10	0 4	0 1	0 6	0 7	0 5	0 14	0 11	0 18	0 14	0 14	0 1	0 7	0 4	0 4	0 2	0 10	0 8	0 6	0 4	0 5	0 6	0 0	0 3	0 14	0 9	0 4	0 7	0 4	0 34	0 55	0 32	0 35	0 25	0 35	0 60	0 42	0 55	0 25	0 44	0 33	0 38	0 32
tig00001299	1107562	A	T	0 17	0 4	0 7	0 10	0 4	0 1	0 6	0 7	0 5	0 14	0 11	0 18	0 14	0 14	0 1	0 7	0 4	0 4	0 2	0 10	0 8	0 6	0 4	0 5	0 6	0 0	0 3	0 14	0 9	0 4	0 7	0 4	0 34	0 55	0 32	0 35	0 25	0 35	0 60	0 42	0 55	0 25	0 44	0 33	0 38	0 32
tig00001299	1107566	C	T	0 17	0 4	0 7	0 10	0 4	0 1	0 6	0 7	0 5	0 14	0 11	12 18	0 14	0 14	1 1	0 7	0 4	0 4	0 2	0 10	0 8	9 6	0 4	0 5	0 6	0 0	0 3	0 14	0 9	0 4	0 7	0 4	0 34	0 55	0 32	0 35	0 25	0 35	0 60	0 42	0 55	0 25	0 44	0 33	0 38	0 32
tig00001299	1107568	C	T	0 18	0 5	0 7	0 10	0 3	0 1	0 6	0 7	0 5	0 14	0 12	0 32	0 14	0 14	0 2	0 7	1 3	0 4	2 0	3 6	0 8	0 15	0 4	0 5	0 6	0 0	2 1	6 7	0 9	0 4	0 7	0 4	0 38	0 55	0 34	0 36	0 26	0 37	0 62	0 47	0 59	0 26	0 44	0 33	0 40	0 33
tig00001299	1107571	G	T	0 18	0 5	0 7	0 11	0 3	0 1	0 6	0 7	0 4	0 14	0 12	0 29	0 14	0 14	0 2	0 7	0 4	0 4	0 2	0 9	0 8	0 15	0 4	0 5	0 6	0 0	0 3	0 13	0 9	0 4	0 8	0 4	0 36	0 55	0 34	0 36	0 26	0 34	0 63	0 47	0 42	0 20	0 43	0 35	0 37	0 31
tig00001299	1107572	C	T	0 18	0 5	0 7	0 11	0 3	0 1	0 6	0 7	0 4	0 14	0 12	0 29	0 14	0 14	0 2	0 7	0 4	0 4	0 2	0 9	0 8	0 15	0 4	0 5	0 6	0 0	0 3	0 13	0 9	0 4	0 8	0 4	0 36	0 55	0 34	0 36	0 26	0 34	0 63	0 47	15 42	7 20	0 43	0 35	0 37	0 31
tig00001299	1107573	G	A	0 17	0 5	0 7	0 11	0 3	0 1	0 6	0 7	0 4	0 14	0 11	0 30	0 14	0 14	0 2	0 7	0 4	0 4	0 2	0 9	0 8	0 15	0 4	0 5	0 6	0 0	0 2	0 12	0 9	0 4	0 8	0 4	16 20	23 31	13 20	15 21	6 20	12 22	21 42	19 27	3 54	14 13	19 23	17 18	13 27	15 17
tig00001299	1107575	T	A	0 18	0 4	0 7	0 11	0 3	0 1	0 6	0 7	0 3	0 14	0 11	0 15	0 13	0 13	0 1	0 7	0 4	0 4	0 2	0 9	0 8	0 5	0 4	0 5	0 6	0 0	0 2	0 12	0 9	0 4	0 8	0 4	0 34	0 51	0 32	0 34	0 26	0 31	0 61	0 44	12 40	0 26	0 40	0 32	0 40	0 32
tig00001299	1107575	T	C	0 18	0 4	0 7	0 11	0 3	0 1	0 6	0 7	0 3	0 14	0 11	14 15	0 13	0 13	1 1	0 7	0 4	0 4	0 2	0 9	0 8	9 5	0 4	0 5	0 6	0 0	0 2	0 12	0 9	0 4	0 8	0 4	0 34	0 51	0 32	0 34	0 26	0 31	0 61	0 44	0 40	0 26	0 40	0 32	0 40	0 32
tig00001299	1107581	G	A	0 16	0 4	0 4	0 10	0 2	0 1	0 5	0 6	0 3	0 10	0 10	0 26	0 11	0 10	0 2	0 7	0 2	0 4	0 2	0 6	0 6	0 13	0 3	0 3	0 4	0 0	0 1	0 12	0 5	3 0	0 6	3 1	15 21	21 29	11 21	15 21	6 20	9 24	18 43	15 24	13 37	14 13	12 22	15 18	9 22	15 17
tig00001299	1107581	GGAAGC	AGAAGT	0 16	0 4	0 4	0 10	0 2	0 1	0 5	0 6	0 3	0 10	0 10	0 26	0 11	0 10	0 2	0 7	0 2	0 4	0 2	0 6	0 6	0 13	0 3	0 3	0 4	0 0	0 1	0 12	0 5	0 0	0 6	0 1	0 21	0 29	0 21	0 21	0 20	0 24	0 43	0 24	0 37	0 13	0 22	0 18	0 22	0 17
tig00001299	1107582	GAAGC	AAAGT	0 16	0 4	0 4	0 10	0 2	0 1	0 5	0 6	0 3	0 10	0 10	0 26	0 11	0 10	0 2	0 7	0 2	0 4	0 2	0 6	0 6	0 13	0 3	0 3	0 4	0 0	0 1	0 12	0 5	0 0	0 6	0 1	0 21	0 29	0 21	0 21	0 20	0 24	0 43	0 24	0 37	0 13	0 22	0 18	0 22	0 17
tig00001299	1107587	GCA	ACG	0 0	0 0	0 0	0 0	0 0	0 0	0 0	0 0	0 0	0 0	0 0	0 14	0 0	0 0	0 1	0 0	0 0	0 0	0 0	0 0	0 0	0 9	0 0	0 0	0 0	0 0	0 0	0 0	0 0	3 0	0 0	0 0	0 15	0 19	0 13	0 15	0 6	0 11	0 21	0 19	0 14	0 14	0 17	0 11	0 13	0 15
tig00001299	1107588	CA	TG	0 0	0 0	0 0	0 0	0 0	0 0	0 0	0 0	0 0	0 0	0 0	0 14	0 0	0 0	0 1	0 0	0 0	0 0	0 0	0 0	0 0	0 9	0 0	0 0	0 0	0 0	0 0	0 0	2 0	0 0	0 0	0 0	19 15	23 19	18 13	20 15	12 6	24 11	44 21	22 19	21 14	10 14	22 17	18 11	23 13	17 15
tig00001299	1107589	A	G	0 0	0 0	0 0	0 0	0 0	0 0	0 0	0 0	0 0	0 0	0 0	0 14	0 0	0 0	0 1	0 0	0 0	0 0	0 0	0 0	0 0	0 9	0 0	0 0	0 0	0 0	0 0	0 0	0 0	0 0	6 0	1 0	0 15	0 19	0 13	0 15	0 6	0 11	0 21	0 19	0 14	0 14	0 17	0 11	0 13	0 15
tig00001299	1107589	ACCC	GCCT	1 0	3 0	2 0	2 0	0 0	0 0	2 0	2 0	2 0	6 0	4 0	0 14	6 0	5 0	1 1	6 0	1 0	0 0	1 0	3 0	0 0	2 9	3 0	1 0	3 0	0 0	1 0	10 0	2 0	0 0	0 0	0 0	0 15	0 19	0 13	0 15	0 6	0 11	0 21	0 19	0 14	0 14	0 17	0 11	0 13	0 15
tig00001299	1107594	C	T	0 4	0 3	0 2	0 8	0 0	0 0	0 2	0 2	0 2	0 6	0 5	0 16	0 6	0 5	0 2	0 6	0 1	0 0	0 1	0 3	0 0	0 11	0 3	0 1	0 3	0 0	0 1	0 11	0 4	0 3	0 6	0 1	19 15	22 19	18 16	7 29	5 12	0 34	40 21	19 19	0 47	3 21	8 30	10 23	16 19	9 23
tig00001299	1107596	GGGGCTGT	AGGGCTGC	0 0	0 0	0 0	0 0	0 0	0 0	0 0	0 0	0 0	0 0	0 0	0 0	0 0	0 0	0 0	0 0	0 0	0 0	0 0	0 0	0 0	0 0	0 0	0 0	0 0	0 0	0 0	0 0	0 0	0 0	5 0	0 0	0 0	0 0	0 0	0 0	0 0	0 0	0 0	0 0	0 0	0 0	0 0	0 0	0 0	0 0
tig00001299	1107596	GGGGCTGTA	AGGGCTGCG	0 0	0 0	0 0	0 0	0 0	0 0	0 0	0 0	0 0	0 0	0 0	0 0	0 0	0 0	0 0	0 0	0 0	0 0	0 0	0 0	0 0	0 0	0 0	0 0	0 0	0 0	0 0	0 0	0 0	0 0	0 0	0 0	0 0	0 0	0 0	0 0	0 0	0 0	0 0	0 0	0 0	0 0	0 0	0 0	0 0	0 0
tig00001299	1107598	GGCTGTA	AGTTGCG	0 0	0 0	0 0	0 0	0 0	0 0	0 0	0 0	0 0	0 0	0 0	0 0	0 0	0 0	0 0	0 0	0 0	0 0	0 0	0 0	0 0	0 0	0 0	0 0	0 0	0 0	0 0	0 0	0 0	2 0	0 0	0 0	0 0	0 0	0 0	0 0	0 0	0 0	0 0	0 0	0 0	0 0	0 0	0 0	0 0	0 0
tig00001299	1107599	GCTGTA	ACTGCG	1 0	0 0	0 0	6 0	0 0	0 0	0 0	1 0	0 0	0 0	0 0	2 0	0 0	0 0	0 0	0 0	0 0	0 0	0 0	0 0	0 0	0 0	0 0	0 0	0 0	0 0	0 0	5 0	0 0	0 0	0 0	0 0	0 0	0 0	0 0	0 0	0 0	0 0	0 0	0 0	0 0	0 0	0 0	0 0	0 0	0 0
tig00001299	1107599	GCTGTA	ATTGCG	0 0	2 0	2 0	2 0	0 0	0 0	2 0	1 0	1 0	4 0	3 0	0 0	5 0	2 0	1 0	5 0	0 0	0 0	0 0	2 0	0 0	1 0	2 0	0 0	3 0	0 0	1 0	3 0	2 0	0 0	0 0	0 0	0 0	0 0	0 0	0 0	0 0	0 0	0 0	0 0	0 0	0 0	0 0	0 0	0 0	0 0
tig00001299	1107599	GC	T	0 0	0 0	0 0	0 0	0 0	0 0	0 0	0 0	0 0	0 0	0 0	0 0	0 0	0 0	0 0	0 0	0 0	0 0	0 0	0 0	0 0	0 0	0 0	0 0	0 0	0 0	0 0	0 0	0 0	0 0	0 0	0 0	0 0	0 0	0 0	0 0	0 0	0 0	0 0	0 0	0 0	0 0	0 0	0 0	0 0	0 0
tig00001299	1107600	CTGT	TTGC	0 0	0 0	0 0	0 0	0 0	0 0	0 0	0 0	0 0	0 0	0 0	0 0	0 0	0 0	0 0	0 0	0 0	0 0	0 0	0 0	0 0	0 0	0 0	0 0	0 0	0 0	0 0	0 0	0 0	0 0	0 0	0 0	0 0	0 0	0 0	13 0	0 0	0 0	0 0	0 0	0 0	0 0	0 0	0 0	0 0	0 0
tig00001299	1107603	T	C	0 0	0 0	0 0	0 0	0 0	0 0	0 0	0 0	0 0	0 0	0 0	0 0	0 0	0 0	0 0	0 0	0 0	0 0	0 0	0 0	0 0	0 0	0 0	0 0	0 0	0 0	0 0	0 0	1 0	0 0	0 0	1 0	20 0	23 0	18 0	7 0	9 0	20 0	42 0	21 0	22 0	9 0	19 0	20 0	23 0	16 0
tig00001299	1107603	TA	CG	0 0	0 0	0 0	0 0	0 0	0 0	0 0	0 0	0 0	0 0	0 0	4 0	0 0	0 0	1 0	0 0	0 0	0 0	0 0	0 0	0 0	4 0	0 0	0 0	0 0	0 0	0 0	0 0	0 0	0 0	0 0	0 0	12 0	17 0	8 0	15 0	2 0	8 0	16 0	15 0	2 0	14 0	7 0	9 0	8 0	12 0
tig00001299	1107606	A	G	0 1	0 2	0 3	0 9	0 0	0 0	0 2	0 2	0 1	0 6	0 4	0 17	0 7	0 2	0 2	0 6	0 0	0 1	0 0	0 3	0 0	0 9	0 6	0 4	0 4	0 0	0 1	0 11	0 3	0 5	0 4	0 1	0 35	0 41	0 30	0 37	0 15	0 27	0 65	0 41	0 48	0 25	0 30	0 36	0 34	0 28
tig00001299	1107608	A	G	0 1	0 2	0 3	0 9	0 0	0 0	0 2	0 2	0 1	0 6	0 4	0 18	0 7	0 2	0 2	0 6	0 0	0 1	0 0	0 3	0 0	0 9	0 6	0 4	0 4	0 1	0 1	0 11	0 3	0 5	0 5	0 1	0 33	0 36	0 28	0 37	3 12	20 8	0 66	0 40	10 38	0 26	11 17	7 27	0 33	0 30
tig00001299	1107610	G	A	0 1	0 2	0 3	0 9	0 0	0 0	0 2	0 2	0 1	0 6	0 4	0 18	0 7	0 2	0 2	0 6	0 0	0 1	0 0	0 3	0 0	0 9	0 6	0 4	0 4	0 1	0 1	0 11	0 3	0 5	0 5	0 1	0 34	0 41	0 30	0 36	0 15	0 29	0 67	0 39	11 33	0 27	0 29	0 35	0 34	0 30
tig00001299	1107613	GCGTTTG	ACGCTTA	0 0	0 0	0 0	0 0	0 0	0 0	0 0	0 0	0 0	0 0	0 0	0 0	0 0	0 0	0 0	0 0	0 0	0 0	0 0	0 0	0 0	0 0	0 0	0 0	0 0	0 0	0 0	0 0	1 0	0 0	0 5	0 1	20 0	18 0	17 0	20 0	8 0	8 0	45 0	19 0	20 11	11 0	12 0	20 0	23 0	17 0
tig00001299	1107616	T	C	1 0	2 0	3 0	8 0	0 0	1 0	2 0	2 0	0 0	6 0	3 0	1 0	6 0	2 0	1 0	6 0	0 0	1 0	0 0	3 0	0 0	1 0	6 0	3 0	4 0	0 0	1 0	10 0	2 0	0 0	0 5	0 1	7 0	11 0	8 0	13 0	4 0	7 0	10 0	8 0	1 11	13 0	2 0	13 0	8 0	11 0
tig00001299	1107621	G	A	0 1	0 3	0 2	0 8	0 0	0 1	0 1	0 1	0 0	0 7	0 4	3 6	0 6	0 2	1 1	0 6	0 1	0 2	0 0	0 2	0 0	1 1	0 5	0 4	0 4	0 1	0 1	0 11	0 3	0 5	0 4	0 1	0 21	0 23	0 25	0 20	0 13	0 31	0 51	0 28	0 31	0 11	0 26	0 31	0 34	0 29
tig00001299	1107621	GCTG	ACTA	0 1	0 3	0 2	0 8	0 0	0 1	0 1	0 1	0 0	0 7	0 4	0 6	0 6	0 2	0 1	0 6	0 1	0 2	0 0	0 2	0 0	0 1	0 5	0 4	0 4	0 1	0 1	0 11	0 3	0 5	0 4	0 1	0 21	0 23	0 25	0 20	0 13	0 31	0 51	0 28	11 31	0 11	0 26	0 31	0 34	0 29
tig00001299	1107622	C	T	0 1	0 3	0 2	0 8	0 0	0 1	0 1	0 1	0 0	0 7	0 4	0 6	0 6	0 2	0 1	0 6	0 1	0 2	0 0	0 2	0 0	0 1	0 5	0 4	0 4	0 1	0 1	0 11	0 3	0 5	0 4	0 1	7 21	8 23	2 25	12 20	0 13	0 31	10 51	8 28	1 31	12 11	0 26	5 31	0 34	0 29
tig00001299	1107625	CCTGCTTGGG	TCTGCTTGGA	0 0	0 0	0 0	0 0	0 0	0 0	0 0	0 0	0 0	0 0	0 0	0 0	0 0	0 0	0 0	0 0	0 0	0 0	0 0	0 0	0 0	0 0	0 0	0 0	0 0	0 0	0 0	0 0	0 0	0 0	0 0	0 0	0 0	0 0	0 0	0 0	0 0	21 0	0 0	0 0	9 0	0 0	0 0	0 0	0 0	0 0
tig00001299	1107625	CCTGCTTGGGGCGGAA	TCTGCTTGGAGCGGAG	0 0	0 0	0 0	0 0	0 0	0 0	0 0	0 0	0 0	0 0	0 0	0 0	0 0	0 0	0 0	0 0	0 0	0 0	0 0	0 0	0 0	0 0	0 0	0 0	0 0	0 0	0 0	0 0	0 0	0 0	0 0	0 0	0 0	0 0	0 0	0 0	5 0	0 0	0 0	0 0	0 0	0 0	8 0	8 0	0 0	0 0
tig00001299	1107628	GCTTGGGGCGGAA	ACCTGGGGCTGAG	1 0	2 0	1 0	8 0	0 0	1 0	1 0	0 0	0 0	3 0	3 0	5 0	4 0	1 0	0 0	4 0	0 0	1 0	0 0	1 0	0 0	0 0	2 0	3 0	2 0	0 0	0 0	3 0	2 0	0 0	0 0	0 0	0 0	0 0	0 0	0 0	0 0	0 0	0 0	0 0	0 0	0 0	0 0	0 0	0 0	0 0
tig00001299	1107629	CTTGGGGCGGAAC	ATTGGGGTGGAGT	0 0	0 0	0 0	0 0	0 0	0 0	0 0	0 0	0 0	0 0	0 0	0 0	0 0	0 0	0 0	0 0	0 0	0 0	0 0	0 0	0 0	0 0	0 0	0 0	0 0	0 0	0 0	0 0	0 0	0 0	0 0	0 0	0 0	0 0	0 0	0 0	0 0	0 0	0 0	0 0	0 0	0 0	0 0	0 0	0 0	0 0
tig00001299	1107629	CTTGGGGCGGAA	TCTGGGGCTGGG	0 0	0 0	0 0	0 0	0 0	0 0	0 0	0 0	0 0	0 0	0 0	0 0	0 0	0 0	0 0	0 0	0 0	0 0	0 0	0 0	0 0	0 0	0 0	0 0	0 0	0 0	0 0	0 0	0 0	0 0	0 0	0 0	0 0	0 0	1 0	0 0	1 0	0 0	3 0	3 0	0 0	4 0	1 0	4 0	4 0	1 0
tig00001299	1107630	TTGGGGCG	CTGAGGCT	0 0	0 0	0 0	0 0	0 0	0 0	0 0	0 0	0 0	0 0	0 0	0 0	0 0	0 0	0 0	0 0	0 0	0 0	0 0	0 0	0 0	0 0	0 0	0 0	0 0	0 0	0 0	0 0	0 0	4 0	0 0	0 0	0 0	0 0	0 0	0 0	0 0	0 0	0 0	0 0	0 0	0 0	0 0	0 0	0 0	0 0
tig00001299	1107630	TTGGGGCGGAA	CTGGGACTGAG	0 0	0 0	0 0	0 0	0 0	0 0	0 0	0 0	0 0	0 0	0 0	0 0	0 0	0 0	0 0	0 0	0 0	0 0	0 0	0 0	0 0	0 0	0 0	0 0	0 0	0 0	0 0	0 0	0 0	0 0	0 0	0 0	0 0	0 0	0 0	0 0	0 0	0 0	0 0	0 0	0 0	0 0	0 0	0 0	0 0	0 0
tig00001299	1107634	GGCGGAA	AGCGGAG	0 0	0 0	0 0	0 0	0 0	0 0	0 0	0 0	0 0	0 0	0 0	0 0	0 0	0 0	0 0	0 0	0 0	0 0	0 0	0 0	0 0	0 0	0 0	0 0	0 0	0 0	0 0	0 0	1 0	0 0	0 0	0 0	17 0	21 0	15 0	16 0	4 0	0 0	33 0	16 0	11 0	11 0	7 0	11 0	23 0	14 0
tig00001299	1107640	A	G	0 0	0 0	0 0	0 0	0 0	0 0	0 0	0 0	0 0	0 0	0 0	0 0	0 0	0 0	0 0	0 0	0 0	0 0	0 0	0 0	0 0	0 0	0 0	0 0	0 0	0 0	0 0	0 0	0 0	0 0	0 0	0 0	0 0	0 0	0 0	0 0	0 0	0 0	0 0	0 0	0 0	0 0	0 0	0 0	0 0	0 0
tig00001299	1107640	AC	GT	0 0	0 0	0 0	0 0	0 0	0 0	0 0	0 0	0 0	0 0	0 0	0 0	0 0	0 0	0 0	0 0	0 0	0 0	0 0	0 0	0 0	0 0	0 0	0 0	0 0	0 0	0 0	0 0	0 0	0 0	3 0	1 0	0 0	0 0	0 0	0 0	0 0	0 0	0 0	0 0	0 0	0 0	0 0	0 0	0 0	0 0
tig00001299	1107645	C	T	0 3	0 5	0 1	0 8	0 0	0 1	0 1	0 1	0 0	0 4	0 4	0 14	0 4	0 1	0 0	0 3	0 1	0 5	0 0	0 1	0 1	0 1	0 5	0 6	0 3	0 1	0 1	0 8	0 3	0 6	0 5	0 1	0 18	0 23	0 21	0 17	0 15	0 27	0 40	0 23	8 24	0 15	0 23	0 27	0 31	0 24
tig00001299	1107649	G	A	0 0	0 0	0 0	0 0	0 0	0 0	0 0	0 0	0 0	0 0	0 0	0 6	0 0	0 0	0 0	0 0	0 0	0 0	0 0	0 0	0 0	0 1	0 0	0 0	0 0	0 0	0 0	0 0	0 1	6 0	0 0	0 0	0 19	0 22	0 21	8 6	0 14	0 24	0 38	0 20	0 30	0 15	0 21	0 25	0 31	0 23
tig00001299	1107649	GCGCC	ACGCT	0 0	0 0	0 0	0 0	0 0	0 0	0 0	0 0	0 0	0 0	0 0	0 6	0 0	0 0	0 0	0 0	0 0	0 0	0 0	0 0	0 0	0 1	0 0	0 0	0 0	0 0	0 0	0 0	0 1	0 0	0 0	0 0	0 19	0 22	0 21	0 6	0 14	0 24	0 38	0 20	0 30	0 15	0 21	0 25	0 31	0 23
tig00001299	1107651	G	A	2 0	0 0	0 0	3 0	0 0	0 0	0 0	0 0	0 0	0 0	0 0	4 6	0 0	0 0	0 0	0 0	0 0	0 0	0 0	1 0	0 0	0 1	0 0	0 0	0 0	0 0	0 0	2 0	0 1	0 0	0 0	0 0	0 19	0 22	0 21	0 6	0 14	0 24	0 38	0 20	0 30	0 15	0 21	0 25	0 31	0 23
tig00001299	1107651	G	T	0 0	0 0	0 0	0 0	0 0	0 0	0 0	0 0	0 0	0 0	0 0	0 6	0 0	0 0	0 0	0 0	0 0	0 0	0 0	0 0	0 0	0 1	0 0	0 0	0 0	0 0	0 0	0 0	0 1	0 0	0 0	0 0	0 19	0 22	0 21	0 6	0 14	0 24	0 38	0 20	0 30	0 15	0 21	0 25	0 31	0 23
tig00001299	1107652	C	T	0 0	0 0	0 0	0 0	0 0	0 0	0 0	0 0	0 0	0 0	0 0	0 6	0 0	0 0	0 0	0 0	0 0	0 0	0 0	0 0	0 0	0 1	0 0	0 0	0 0	0 0	0 0	0 0	0 1	0 0	3 0	1 0	0 19	0 22	0 21	0 6	0 14	0 24	0 38	0 20	0 30	0 15	0 21	0 25	0 31	0 23
tig00001299	1107655	C	T	0 3	0 3	0 1	0 7	0 0	0 1	0 0	0 1	0 0	0 7	0 1	0 9	0 2	0 0	0 0	0 1	0 1	0 6	0 0	0 1	0 1	0 1	0 4	0 6	0 2	0 1	0 1	0 9	0 2	0 7	0 4	0 1	0 19	1 20	0 23	1 13	0 15	0 24	0 37	0 21	0 29	4 11	0 20	1 24	0 32	0 22
tig00001299	1107658	G	A	0 3	0 3	0 1	0 4	0 0	0 1	0 0	0 1	0 0	0 7	0 0	0 6	0 3	0 0	0 0	0 1	0 1	0 6	0 0	0 1	0 1	0 0	0 4	0 6	0 2	0 1	0 1	0 9	0 5	0 7	0 0	0 0	0 18	0 18	0 19	0 11	0 12	0 17	0 32	0 15	0 20	0 10	0 14	0 23	0 27	0 15
tig00001299	1107659	G	A	0 3	0 3	0 1	0 4	0 0	0 1	0 0	0 1	0 0	0 7	0 0	0 6	0 3	0 0	0 0	0 1	0 1	0 6	0 0	0 1	0 1	0 0	0 4	0 6	0 2	0 1	0 1	0 9	0 5	0 7	4 0	1 0	0 18	0 18	0 19	0 11	0 12	0 17	0 32	0 15	0 20	0 10	0 14	0 23	0 27	0 15
tig00001299	1107660	T	C	0 3	0 3	0 1	0 4	0 0	0 1	0 0	0 1	0 0	0 7	0 0	1 6	0 3	0 0	0 0	0 1	0 1	0 6	0 0	0 1	0 1	0 0	0 4	0 6	0 2	0 1	0 1	0 9	0 5	0 7	0 0	0 0	0 18	2 18	2 19	1 11	3 12	3 17	3 32	6 15	1 20	3 10	7 14	3 23	3 27	5 15
tig00001299	1107661	G	A	0 3	0 3	0 1	0 4	0 0	0 1	0 0	0 1	0 0	0 7	0 0	0 7	0 3	0 0	0 0	0 1	0 1	0 6	0 0	0 1	0 1	0 0	0 4	0 6	0 2	0 1	0 1	0 9	0 5	0 7	0 3	0 1	0 18	0 20	0 20	0 12	7 7	0 20	0 35	0 20	0 21	0 14	6 15	8 16	0 30	0 20
tig00001299	1107666	GTT	ATC	0 0	0 0	0 0	0 0	0 0	0 0	0 0	0 0	0 0	0 0	0 0	0 0	0 0	0 0	0 0	0 0	0 0	0 0	0 0	0 0	0 0	0 0	0 0	0 0	0 0	0 0	0 0	0 0	5 0	0 0	0 0	0 0	16 0	17 0	16 0	10 0	10 0	16 0	27 0	11 0	14 0	10 0	14 0	20 0	20 0	6 0
tig00001299	1107666	GTTTGC	ATCTGT	0 0	0 0	0 0	0 0	0 0	0 0	0 0	0 0	0 0	0 0	0 0	0 0	0 0	0 0	0 0	0 0	0 0	0 0	0 0	0 0	0 0	0 0	0 0	0 0	0 0	0 0	0 0	0 0	0 0	0 0	0 0	0 0	0 0	0 0	0 0	0 0	0 0	0 0	0 0	0 0	0 0	0 0	0 0	0 0	4 0	6 0
tig00001299	1107668	T	C	2 0	2 0	1 0	4 0	1 0	1 0	0 0	1 0	0 0	6 0	0 0	5 0	2 0	0 0	0 0	2 0	0 0	5 0	0 0	1 0	0 0	1 0	4 0	4 0	1 0	0 0	1 0	7 0	0 0	0 0	0 0	0 0	0 0	0 0	0 0	0 0	0 0	0 0	0 0	0 0	0 0	0 0	0 0	0 0	0 0	0 0
tig00001299	1107668	TTG	CTA	0 0	0 0	0 0	0 0	0 0	0 0	0 0	0 0	0 0	0 0	0 0	0 0	0 0	0 0	0 0	0 0	0 0	0 0	0 0	0 0	0 0	0 0	0 0	0 0	0 0	0 0	0 0	0 0	0 0	0 0	3 0	1 0	0 0	0 0	0 0	0 0	0 0	0 0	0 0	0 0	0 0	0 0	0 0	0 0	0 0	0 0
tig00001299	1107668	TTGCTTC	CTACTTT	0 0	0 0	0 0	0 0	0 0	0 0	0 0	0 0	0 0	0 0	0 0	0 0	0 0	0 0	0 0	0 0	0 0	0 0	0 0	0 0	0 0	0 0	0 0	0 0	0 0	0 0	0 0	0 0	0 0	7 0	0 0	0 0	0 0	0 0	0 0	0 0	0 0	0 0	0 0	0 0	0 0	0 0	0 0	0 0	0 0	0 0
tig00001299	1107682	G	A	0 3	0 7	0 1	0 5	0 2	0 1	0 2	0 2	0 0	0 10	0 1	0 7	0 3	0 1	0 0	0 2	0 2	0 10	0 0	0 1	0 1	0 2	0 4	0 7	0 2	0 1	0 1	0 10	5 2	0 8	0 3	0 0	17 0	15 0	14 0	11 0	8 0	15 0	25 0	12 0	13 0	8 0	15 0	23 0	25 0	11 0
tig00001299	1107693	G	GCAC	2 0	3 0	0 0	3 0	0 0	1 0	1 0	0 0	0 0	6 0	1 0	3 0	0 0	0 0	0 0	1 0	0 0	5 0	0 0	0 0	0 0	0 0	0 0	4 0	0 0	0 0	1 0	4 0	1 0	1 0	0 1	0 0	0 0	0 0	0 0	0 0	0 0	0 0	0 0	0 0	0 0	0 0	0 0	0 0	0 0	0 0
tig00001299	1107697	GTGGA	CACATGGC	0 0	0 0	0 0	0 0	0 0	0 0	0 0	0 0	0 0	0 0	0 0	0 0	0 0	0 0	0 0	0 0	0 0	0 0	0 0	0 0	0 0	0 0	0 0	0 0	0 0	0 0	0 0	0 0	0 0	0 0	0 1	0 0	0 0	0 0	0 0	2 0	0 0	0 0	0 0	0 0	0 0	0 0	0 0	0 0	0 0	0 0
tig00001299	1107697	GTGGA	CACGTGGC	0 0	0 0	0 0	0 0	0 0	0 0	0 0	0 0	0 0	0 0	0 0	0 0	0 0	0 0	0 0	0 0	0 0	0 0	0 0	0 0	0 0	0 0	0 0	0 0	0 0	0 0	0 0	0 0	0 0	0 0	0 1	0 0	7 0	8 0	6 0	2 0	6 0	6 0	12 0	5 0	9 0	6 0	10 0	16 0	12 0	7 0
tig00001299	1107700	G	A	0 0	0 0	0 0	0 0	0 0	0 0	0 0	0 0	0 0	0 0	0 0	0 0	0 0	0 0	0 0	0 0	0 0	0 0	0 0	0 0	0 0	0 0	0 0	0 0	0 0	0 0	0 0	0 0	0 0	0 0	0 1	0 0	0 0	0 0	0 0	0 0	0 0	0 0	0 0	0 0	0 0	0 0	0 0	0 0	0 0	0 0
tig00001299	1107708	GTAT	ACAA	0 0	0 0	0 0	0 0	0 0	0 0	0 0	0 0	0 0	0 0	0 0	0 0	0 0	0 0	0 0	0 0	0 0	0 0	0 0	0 0	0 0	0 0	0 0	0 0	0 0	0 0	0 0	0 0	0 7	0 0	0 1	0 0	9 0	8 0	5 0	3 0	6 0	7 0	12 0	7 0	6 0	6 0	12 0	15 0	11 0	7 0
tig00001299	1107709	T	C	5 0	5 0	0 0	4 0	2 0	4 0	4 0	2 0	0 0	8 0	4 0	3 0	0 0	2 0	0 0	1 0	0 0	6 0	1 0	0 0	2 0	2 0	0 0	3 0	0 0	2 0	1 0	5 0	2 7	4 0	0 1	0 0	0 0	0 0	0 0	0 0	0 0	0 0	0 0	0 0	0 0	0 0	0 0	0 0	0 0	0 0
tig00001299	1107719	T	C	5 0	5 0	0 0	4 0	2 0	4 0	4 0	3 0	0 0	6 0	2 0	4 0	0 0	2 0	0 0	1 0	0 0	6 0	1 0	0 0	2 0	2 0	0 0	3 0	0 0	2 0	1 0	5 0	2 0	0 0	0 0	0 0	0 0	0 0	0 0	0 0	0 0	0 0	0 0	0 0	0 0	0 0	0 0	0 0	0 0	0 0
tig00001299	1107719	TCAAGCC	CCAAGCT	0 0	0 0	0 0	0 0	0 0	0 0	0 0	0 0	0 0	0 0	0 0	0 0	0 0	0 0	0 0	0 0	0 0	0 0	0 0	0 0	0 0	0 0	0 0	0 0	0 0	0 0	0 0	0 0	8 0	0 0	0 0	0 0	12 0	9 0	6 0	4 0	1 0	0 0	13 0	7 0	7 0	6 0	8 0	8 0	12 0	9 0
tig00001299	1107719	TCAAGCC	CCTAGCT	0 0	0 0	0 0	0 0	0 0	0 0	0 0	0 0	0 0	0 0	0 0	0 0	0 0	0 0	0 0	0 0	0 0	0 0	0 0	0 0	0 0	0 0	0 0	0 0	0 0	0 0	0 0	0 0	0 0	0 0	0 0	0 0	0 0	0 0	0 0	0 0	5 0	7 0	0 0	0 0	1 0	0 0	4 0	8 0	0 0	0 0
tig00001299	1107731	TATAGT	CACAAC	2 0	4 0	0 0	1 0	2 0	4 0	7 0	1 0	1 0	7 0	5 0	0 0	1 0	2 0	0 0	1 0	1 0	4 0	1 0	0 0	3 0	1 0	1 0	2 0	1 0	2 0	0 0	1 0	2 0	2 0	0 0	0 0	0 0	0 0	0 0	0 0	0 0	0 0	0 0	0 0	0 0	0 0	0 0	0 0	0 0	0 0
tig00001299	1107735	G	A	0 0	0 0	0 0	0 0	0 0	0 0	0 0	0 0	0 0	0 0	0 0	0 0	0 0	0 0	0 0	0 0	0 0	0 0	0 0	0 0	0 0	0 0	0 0	0 0	0 0	0 0	0 0	0 0	0 0	0 0	0 0	0 0	0 0	0 0	0 0	0 0	0 0	0 0	0 0	0 0	0 0	0 0	0 0	0 0	0 0	0 0
tig00001299	1107736	T	C	0 0	0 0	0 0	0 0	0 0	0 0	0 0	0 0	0 0	0 0	0 0	0 0	0 0	0 0	0 0	0 0	0 0	0 0	0 0	0 0	0 0	0 0	0 0	0 0	0 0	0 0	0 0	0 0	9 0	0 0	0 0	0 0	11 0	8 0	5 0	4 0	8 0	7 0	14 0	5 0	10 0	7 0	14 0	18 0	13 0	9 0
tig00001299	1107744	G	A	0 3	0 6	0 2	0 2	0 2	0 4	0 9	0 7	0 6	0 9	0 5	0 6	0 1	0 5	0 0	0 2	0 5	0 4	0 2	0 4	0 4	0 2	0 1	0 3	0 4	0 9	0 3	0 5	0 15	0 3	0 0	0 0	0 11	0 7	0 7	0 8	0 9	0 9	0 13	0 5	0 9	0 9	0 17	0 16	0 14	0 11
tig00001299	1107746	C	T	0 3	0 6	0 2	0 2	0 2	0 5	0 9	0 7	0 6	0 10	0 5	0 6	0 1	0 5	0 0	0 2	0 5	0 4	0 2	0 4	0 4	0 2	0 1	0 3	0 4	0 10	0 3	0 6	0 15	0 3	0 1	0 0	0 14	0 8	0 8	0 12	0 14	0 15	0 15	0 8	0 9	0 11	0 22	0 16	0 17	0 15
tig00001299	1107754	C	T	0 3	0 6	0 2	0 1	0 2	0 5	0 9	0 8	0 6	0 9	0 5	0 5	0 1	0 5	0 0	0 2	0 5	0 5	0 2	0 5	0 4	0 3	0 1	0 3	0 4	0 10	0 3	0 4	0 12	0 9	0 4	0 0	0 13	0 7	1 8	0 10	0 16	0 10	0 15	0 7	0 10	0 10	0 19	0 18	0 19	0 15
tig00001299	1107760	G	A	0 3	0 5	0 2	0 1	0 1	0 4	0 7	0 8	0 5	0 9	0 5	0 5	0 1	0 5	0 0	0 1	0 5	0 3	0 2	0 4	0 4	0 2	0 1	0 3	0 4	0 10	0 3	0 5	0 12	0 6	0 1	0 0	0 13	0 7	0 8	0 9	0 17	0 10	0 17	0 9	0 11	0 10	0 19	0 17	0 14	0 12
tig00001299	1107760	G	T	0 3	0 5	0 2	0 1	0 1	0 4	2 7	0 8	0 5	0 9	0 5	0 5	0 1	0 5	0 0	0 1	0 5	0 3	0 2	0 4	0 4	0 2	0 1	0 3	0 4	0 10	0 3	0 5	0 12	0 6	0 1	0 0	0 13	0 7	0 8	0 9	0 17	0 10	0 17	0 9	0 11	0 10	0 19	0 17	0 14	0 12
tig00001299	1107760	GC	TT	0 3	0 5	0 2	0 1	0 1	0 4	0 7	0 8	0 5	0 9	0 5	0 5	0 1	0 5	0 0	0 1	0 5	0 3	0 2	0 4	0 4	0 2	0 1	0 3	0 4	0 10	0 3	0 5	0 12	4 6	3 1	0 0	0 13	0 7	0 8	0 9	0 17	0 10	0 17	0 9	0 11	0 10	0 19	0 17	0 14	0 12
tig00001299	1107762	TC	AT	0 2	0 5	0 2	0 1	0 1	0 6	0 9	0 2	0 2	0 9	0 5	0 2	0 1	0 5	0 0	0 1	0 5	0 3	0 2	0 4	0 4	0 1	0 1	0 3	0 4	0 10	0 3	0 0	0 11	0 11	0 4	0 0	0 13	0 7	0 6	0 11	0 19	0 11	0 16	0 9	0 11	0 10	0 16	0 16	0 16	0 12
tig00001299	1107763	C	T	0 2	0 5	0 2	0 1	0 1	0 6	0 9	7 2	3 2	0 9	0 5	3 2	0 1	0 5	0 0	0 1	0 5	0 3	0 2	2 4	0 4	1 1	0 1	0 3	0 4	0 10	0 3	4 0	0 11	0 11	1 4	0 0	0 13	0 7	0 6	0 11	0 19	0 11	0 16	0 9	0 11	0 10	0 16	0 16	0 16	0 12
tig00001299	1107768	G	C	0 1	0 3	0 2	0 0	0 1	0 6	0 8	0 9	0 5	0 9	0 4	0 6	0 1	0 4	0 0	0 1	0 5	0 2	0 1	0 7	0 2	0 2	0 1	0 2	0 4	0 10	0 3	0 4	0 9	4 2	3 3	0 0	0 4	0 1	0 2	0 10	0 3	0 7	0 4	0 2	0 1	0 1	0 4	0 4	0 5	0 5
tig00001299	1107770	G	A	0 1	0 3	0 2	0 0	0 1	0 6	0 8	0 9	0 5	0 9	0 4	0 6	0 1	0 4	0 0	0 1	0 5	0 2	0 1	0 7	0 2	0 2	0 1	0 2	0 4	0 10	0 3	0 4	0 9	0 2	0 3	0 0	10 4	5 1	4 2	0 10	7 3	3 7	10 4	4 2	11 1	9 1	10 4	12 4	11 5	9 5
tig00001299	1107773	GCCCA	ACCCC	0 0	0 0	0 0	0 0	0 0	0 0	0 0	0 0	0 0	0 0	0 0	0 0	0 0	0 0	0 0	0 0	0 0	0 0	0 0	0 0	0 0	0 0	0 0	0 0	0 0	0 0	0 0	0 0	0 0	0 4	0 4	0 0	0 4	0 0	0 2	0 2	0 2	0 0	0 4	0 2	0 0	0 1	0 0	0 4	0 3	0 2
tig00001299	1107776	C	A	0 0	0 0	0 0	0 0	0 0	0 0	0 0	0 0	0 0	0 0	0 0	0 0	0 0	0 0	0 0	0 0	0 0	0 0	0 0	2 0	0 0	0 0	0 0	0 0	0 0	0 0	0 0	0 0	0 0	0 4	0 4	0 0	0 4	0 0	0 2	0 2	0 2	0 0	0 4	0 2	0 0	0 1	0 0	0 4	0 3	0 2
tig00001299	1107779	GCA	ACG	0 0	0 0	0 0	0 0	0 0	0 0	0 0	6 0	3 0	0 0	0 0	3 0	0 0	0 0	0 0	0 0	0 0	0 0	0 0	0 0	0 0	0 0	0 0	0 0	0 0	1 0	0 0	3 0	0 0	0 4	0 4	0 0	0 4	0 0	0 2	0 2	5 2	0 0	0 4	0 2	0 0	0 1	3 0	8 4	0 3	0 2
tig00001299	1107780	CA	AG	0 0	0 0	0 0	0 0	0 0	0 0	0 0	0 0	0 0	0 0	0 0	0 0	0 0	0 0	0 0	0 0	0 0	0 0	0 0	0 0	0 0	0 0	0 0	0 0	0 0	0 0	0 0	0 0	0 0	0 4	0 4	0 0	0 4	0 0	0 2	0 2	0 2	0 0	0 4	0 2	6 0	5 1	0 0	0 4	0 3	0 2
tig00001299	1107781	A	G	0 0	0 0	0 0	0 0	0 0	0 0	2 0	0 0	0 0	0 0	0 0	0 0	0 0	0 0	0 0	0 0	0 0	0 0	0 0	0 0	0 0	0 0	0 0	0 0	0 0	0 0	0 0	0 0	6 0	0 4	2 4	0 0	4 4	0 0	0 2	6 2	0 2	3 0	0 4	0 2	4 0	0 1	0 0	0 4	1 3	4 2
tig00001299	1107781	AC	GT	0 0	0 0	0 0	0 0	0 0	0 0	0 0	0 0	0 0	0 0	0 0	0 0	0 0	0 0	0 0	0 0	0 0	0 0	0 0	0 0	0 0	0 0	0 0	0 0	0 0	0 0	0 0	0 0	0 0	0 4	0 4	0 0	1 4	3 0	4 2	0 2	5 2	0 0	7 4	2 2	0 0	3 1	6 0	5 4	4 3	6 2
tig00001299	1107786	G	A	0 2	0 0	0 1	0 0	0 0	0 2	0 2	0 8	0 3	0 1	0 0	0 5	0 1	0 1	0 0	0 0	0 0	0 1	0 0	3 1	0 1	0 2	0 1	0 0	0 0	0 1	0 0	0 4	0 8	0 11	0 8	0 0	0 13	0 7	0 6	0 13	0 19	0 11	0 14	0 13	0 13	0 10	0 13	0 17	0 12	0 16
tig00001299	1107791	GCT	ACC	0 2	0 0	0 1	0 0	0 0	0 3	0 2	0 8	0 3	0 1	0 0	0 7	0 1	0 1	0 0	0 1	0 0	0 0	0 0	0 3	0 2	0 2	0 1	0 0	0 0	0 0	0 0	0 4	0 8	0 11	0 6	0 0	0 11	0 6	0 4	0 11	2 11	7 4	0 14	1 10	0 11	0 10	4 8	0 15	0 10	3 12
tig00001299	1107795	GGG	CGA	0 0	0 0	0 1	0 0	0 0	0 0	0 2	0 0	0 0	0 1	0 0	0 1	0 0	0 0	0 0	0 0	0 0	0 0	0 0	0 3	0 0	0 2	0 0	0 0	0 0	0 0	0 0	0 0	4 0	0 7	0 4	0 0	9 0	7 0	1 1	7 0	7 8	3 7	12 3	6 3	11 1	9 0	8 4	9 0	6 0	11 4
tig00001299	1107796	G	A	0 0	0 0	0 1	0 0	0 0	0 0	0 2	0 0	0 0	0 1	0 0	0 1	0 0	0 0	0 0	0 0	0 0	0 0	0 0	0 3	0 0	0 2	0 0	0 0	0 0	0 0	0 0	0 0	0 0	4 7	3 4	0 0	0 0	0 0	0 1	0 0	0 8	0 7	0 3	0 3	0 1	0 0	0 4	0 0	0 0	0 4
tig00001299	1107798	C	T	0 0	0 0	0 1	0 0	0 0	0 0	0 2	7 0	3 0	0 1	0 0	4 1	0 0	0 0	0 0	0 0	0 0	1 0	0 0	1 3	0 0	0 2	0 0	0 0	0 0	1 0	0 0	4 0	0 0	0 7	0 4	0 0	4 0	0 0	1 1	2 0	2 8	1 7	3 3	3 3	0 1	1 0	0 4	3 0	3 0	2 4
tig00001299	1107800	G	A	0 2	0 2	0 2	0 0	0 0	0 1	0 4	0 8	0 3	0 1	0 0	0 7	0 2	0 0	0 1	0 1	0 0	0 2	0 3	0 4	0 3	0 3	0 2	0 0	0 0	0 1	0 3	0 5	0 6	0 9	0 5	0 0	0 13	0 7	0 2	0 11	6 11	0 11	3 15	3 10	0 12	0 10	0 13	0 15	0 11	0 17
tig00001299	1107807	T	C	0 0	0 0	0 0	0 0	0 0	0 0	0 0	0 7	0 4	0 0	0 0	0 4	0 0	0 0	0 0	0 0	0 0	0 0	0 0	0 3	0 0	0 1	0 0	0 0	0 0	0 0	0 0	0 5	2 0	9 0	3 0	0 0	10 0	7 0	1 0	8 2	9 6	5 0	14 1	9 2	11 0	10 0	6 0	9 0	4 2	11 0
tig00001299	1107831	G	A	3 3	5 2	4 5	0 1	1 1	1 8	0 10	4 5	4 1	2 3	3 8	3 2	2 5	1 2	0 3	0 2	0 2	5 1	2 10	0 3	0 3	1 7	4 6	0 3	0 2	0 0	0 4	4 5	0 1	2 13	2 2	0 0	0 7	0 19	0 2	0 15	6 20	0 20	1 17	2 15	0 19	0 19	0 31	0 7	0 19	0 21
tig00001299	1107840	AT	A	0 7	0 7	0 10	0 1	0 2	0 5	0 7	0 3	0 5	0 5	0 5	0 4	0 8	0 4	0 4	0 4	0 3	0 8	0 13	0 3	0 3	0 8	0 11	0 4	0 2	0 0	0 5	0 8	0 1	3 4	0 2	0 0	0 4	0 7	0 2	0 7	0 12	0 10	0 9	0 9	0 10	0 10	0 12	0 8	0 4	0 16
tig00001299	1107841	T	A	0 7	0 7	0 10	0 1	0 2	5 5	4 7	3 3	0 5	0 5	7 5	0 4	0 8	0 4	0 4	0 4	0 3	0 8	0 13	0 3	0 3	0 8	0 11	0 4	0 2	0 0	0 5	0 8	0 1	0 4	0 2	0 0	0 4	0 7	0 2	0 7	0 12	0 10	0 9	0 9	0 10	0 10	0 12	0 8	0 4	0 16
tig00001299	1107848	C	A	0 6	0 7	0 13	0 1	0 2	0 10	0 9	0 5	0 5	0 4	0 12	0 5	0 9	0 5	0 4	0 4	0 1	0 8	0 9	0 0	0 3	0 8	0 12	0 3	0 1	0 0	0 5	0 7	0 1	0 12	0 1	0 0	0 3	0 18	1 1	0 14	3 20	0 19	0 12	0 13	0 16	0 17	0 32	0 8	2 17	0 19
tig00001299	1107848	C	T	1 6	0 7	0 13	0 1	0 2	0 10	3 9	1 5	0 5	1 4	0 12	0 5	0 9	0 5	0 4	1 4	2 1	0 8	4 9	2 0	0 3	0 8	0 12	1 3	1 1	0 0	0 5	1 7	0 1	0 12	0 1	0 0	0 3	0 18	0 1	0 14	0 20	0 19	0 12	0 13	0 16	0 17	0 32	0 8	0 17	1 19
tig00001299	1107850	T	C	0 7	0 7	0 13	0 1	0 2	0 10	0 12	0 6	0 5	0 6	0 12	0 5	0 9	0 5	0 4	0 5	0 3	0 8	0 13	0 2	0 3	0 7	0 12	0 4	0 3	0 0	0 5	0 8	0 1	0 12	0 2	0 0	0 2	0 18	0 2	0 14	0 24	0 19	0 12	0 13	6 10	5 11	0 31	0 8	0 18	0 20
tig00001299	1107852	G	A	0 7	0 7	0 13	0 1	0 2	0 10	0 12	0 6	0 5	0 6	0 12	0 4	0 9	0 5	0 4	0 5	0 3	0 8	0 13	0 2	0 3	0 7	0 12	0 4	0 4	0 0	0 5	0 8	0 1	0 12	0 1	0 0	0 3	0 17	0 2	6 9	0 23	0 18	0 12	0 14	0 16	0 18	0 32	0 8	0 19	0 20
tig00001299	1107857	C	T	0 7	0 7	0 14	0 1	0 2	0 10	0 10	0 5	0 4	0 7	0 12	0 3	0 9	0 5	0 4	0 5	0 3	1 6	0 13	0 1	0 3	0 7	0 12	0 6	0 4	0 0	0 5	0 8	0 2	0 12	0 1	0 0	0 3	0 17	0 2	0 15	0 23	0 18	0 10	0 14	0 16	0 18	0 31	0 7	0 19	0 21
tig00001299	1107863	ATTC	A	0 7	0 7	0 14	0 1	0 2	0 5	0 6	0 2	0 4	0 5	0 4	0 3	0 8	0 4	0 4	0 2	0 1	0 4	0 8	0 0	0 3	0 6	0 12	0 5	0 3	0 0	0 5	0 6	0 2	0 11	0 0	0 0	0 3	0 16	0 1	0 16	0 21	0 16	0 10	0 14	0 14	0 19	0 29	0 5	0 17	0 19
tig00001299	1107866	C	A	0 7	0 7	0 14	0 1	0 2	4 5	4 6	2 2	0 4	1 5	4 4	0 3	1 8	0 4	0 4	1 2	0 1	0 4	0 8	0 0	0 3	0 6	0 12	0 5	0 3	0 0	0 5	0 6	0 2	0 11	0 0	0 0	0 3	0 16	0 1	0 16	1 21	0 16	0 10	0 14	0 14	0 19	0 29	0 5	0 17	0 19
tig00001299	1107876	T	C	0 7	0 7	0 16	0 1	0 2	0 9	0 13	0 4	0 4	0 7	0 8	0 3	0 10	0 5	0 4	0 6	0 3	0 7	0 13	0 0	0 3	0 6	0 12	0 7	0 4	0 0	0 5	0 9	0 2	0 11	0 1	0 0	0 3	0 16	0 1	0 15	0 24	0 16	0 10	0 14	0 15	0 18	0 29	0 5	0 18	0 19
tig00001299	1107881	C	A	0 5	0 7	0 16	0 1	0 2	2 6	1 7	2 2	0 4	0 6	2 5	0 1	0 9	0 5	0 4	0 5	0 3	0 7	0 13	0 0	0 1	0 6	0 11	0 7	0 4	0 0	0 5	0 9	0 2	0 11	0 1	0 0	0 3	0 4	0 0	0 5	0 8	0 0	0 5	0 6	0 7	0 7	0 5	0 4	0 2	0 10
tig00001299	1107881	C	T	0 5	0 7	0 16	0 1	0 2	0 6	0 7	0 2	0 4	0 6	0 5	0 1	0 9	0 5	0 4	0 5	0 3	0 7	0 13	0 0	0 1	0 6	0 11	0 7	0 4	0 0	0 5	0 9	0 2	0 11	0 1	0 0	0 3	0 4	0 0	0 5	1 8	0 0	0 5	0 6	0 7	0 7	0 5	0 4	0 2	0 10
tig00001299	1107900	T	A	0 5	0 5	0 15	0 1	0 2	0 6	0 5	0 1	0 3	0 6	0 5	0 1	0 8	0 5	0 3	0 5	0 3	0 7	0 10	0 0	0 0	0 5	0 9	0 7	0 4	0 0	0 2	0 8	0 3	0 10	0 1	0 0	0 3	0 4	0 0	0 4	0 9	0 3	0 6	0 5	0 6	0 5	0 4	0 4	0 2	0 13
tig00001299	1107904	A	AAAAAT	0 4	0 2	0 8	0 1	0 0	0 4	0 4	0 1	0 3	0 3	0 4	0 0	0 5	0 3	0 2	0 4	0 3	0 5	0 6	0 0	0 0	0 1	0 7	0 5	0 3	0 0	0 2	0 5	0 2	0 3	0 0	0 0	2 0	1 0	0 0	3 1	2 2	0 0	0 0	4 0	4 0	5 0	4 0	2 0	0 0	6 0
tig00001299	1107919	T	C	0 2	0 0	0 0	0 0	0 0	0 0	0 1	0 1	0 0	0 0	0 0	0 0	0 0	0 0	0 0	0 0	0 0	0 0	0 3	0 0	0 0	0 0	0 0	0 0	0 0	0 0	0 0	0 1	0 1	2 1	0 0	0 0	0 2	0 1	0 0	0 4	0 3	0 3	0 4	0 4	0 3	0 5	0 4	0 3	0 0	0 10
tig00001299	1107919	TG	T	0 2	0 0	0 0	0 0	0 0	0 0	0 1	0 1	0 0	0 0	0 0	0 0	0 0	0 0	0 0	0 0	0 0	0 0	0 3	0 0	0 0	0 0	2 0	4 0	2 0	0 0	1 0	1 1	0 1	0 1	0 0	0 0	0 2	0 1	0 0	0 4	0 3	0 3	0 4	0 4	0 3	0 5	0 4	0 3	0 0	0 10
tig00001299	1107951	G	A	1 0	0 0	3 0	0 0	0 0	2 0	1 0	0 0	0 0	1 0	0 0	0 0	1 0	0 0	0 0	1 0	0 0	1 0	0 0	0 0	0 0	0 0	0 0	3 0	1 0	0 0	0 0	1 0	1 1	0 0	0 0	0 0	0 1	0 0	0 0	0 2	0 2	0 0	0 2	0 1	0 1	0 3	0 2	0 3	0 0	0 3
tig00001299	1107992	A	T	1 0	0 0	0 0	0 0	0 0	0 0	0 0	0 0	0 0	0 0	0 0	0 0	0 0	0 0	0 0	0 0	0 0	1 0	0 0	0 0	0 0	0 0	0 0	0 0	0 0	0 0	0 0	0 0	0 0	0 0	0 0	0 0	0 0	0 0	0 0	2 0	2 0	0 0	2 0	0 0	1 0	1 0	0 0	3 0	0 0	4 0
tig00001299	1108012	G	GTGTTGATC	0 0	0 0	0 0	0 0	0 0	0 0	0 0	0 0	0 0	0 0	0 0	0 0	0 0	0 0	0 0	0 0	0 0	0 0	0 0	0 0	0 0	0 0	0 0	0 0	0 0	0 0	0 0	0 0	0 0	0 0	0 0	0 0	0 0	0 0	0 0	0 0	0 0	1 0	2 0	0 0	0 0	0 0	0 0	1 0	0 2	0 0
tig00001299	1108057	T	A	0 0	0 0	0 0	0 0	0 0	1 0	0 0	0 0	0 0	0 0	0 0	0 0	0 0	0 0	0 0	0 0	0 0	0 0	0 0	0 0	0 0	1 0	0 0	0 0	0 0	0 0	0 0	0 0	0 0	0 0	0 0	0 0	0 0	1 0	2 0	2 0	4 0	3 0	3 0	1 0	4 0	2 0	0 0	0 0	0 0	3 0
tig00001299	1108073	A	C	0 0	0 0	0 0	0 0	0 0	1 1	0 0	0 0	0 0	0 0	0 0	0 0	0 0	0 0	0 0	1 0	0 0	0 0	0 0	0 0	0 0	0 1	0 0	0 0	0 1	0 0	0 0	0 0	0 0	0 0	0 0	0 0	0 3	1 0	0 2	0 2	3 1	2 2	2 3	0 1	1 3	2 0	0 0	1 0	0 0	3 1
tig00001299	1108094	G	T	0 0	0 0	0 2	0 0	0 0	0 2	0 0	0 0	0 0	0 0	0 0	0 1	0 0	0 0	0 0	0 1	0 0	0 1	0 0	0 1	0 0	0 1	0 0	0 0	0 1	0 0	0 0	0 0	0 0	0 1	0 1	0 0	0 5	1 1	0 2	0 4	2 5	1 3	0 7	0 1	0 5	2 1	0 0	1 0	0 3	1 5
tig00001299	1108109	A	T	0 1	0 1	0 2	0 0	0 0	0 3	0 0	0 0	0 0	0 0	0 1	0 1	0 1	0 0	0 0	0 7	0 0	0 1	0 1	0 1	0 0	0 2	0 1	0 2	0 2	0 0	0 0	0 0	0 0	0 1	0 1	0 1	0 5	0 7	0 2	0 4	0 12	0 9	0 7	0 3	0 7	0 5	0 4	0 1	0 3	0 8
tig00001299	1108112	AT	A	0 1	0 1	0 2	0 0	0 0	0 3	0 0	0 0	0 0	0 0	0 1	0 1	0 1	0 0	0 0	0 7	0 0	0 1	0 1	0 0	0 0	0 2	0 1	0 2	0 2	0 0	0 0	0 0	0 0	0 1	0 0	0 0	0 5	1 5	0 2	0 4	3 9	1 8	0 5	0 3	0 6	2 3	0 4	0 0	0 3	1 7
tig00001299	1108129	T	C	0 1	0 2	0 2	0 0	0 0	0 3	0 1	0 1	0 0	0 0	0 1	0 1	0 2	0 1	0 0	0 8	0 0	0 1	0 1	0 1	0 1	0 4	0 2	0 3	0 2	0 0	0 0	0 0	0 1	0 2	0 1	0 1	0 5	1 6	0 2	0 9	4 12	4 8	2 9	2 2	3 8	4 4	2 4	1 4	3 2	4 5
tig00001299	1108132	T	A	0 1	0 2	0 2	0 0	0 0	0 3	0 1	0 1	0 0	0 0	0 1	0 1	0 2	0 1	0 0	0 8	0 0	0 1	0 1	0 1	0 1	0 4	0 2	0 3	0 2	0 0	0 0	0 1	0 1	0 2	0 1	0 1	8 2	5 3	2 0	7 2	5 13	3 8	6 6	1 3	3 8	1 7	4 2	1 4	1 6	6 6
tig00001299	1108138	C	T	0 1	0 2	0 2	0 0	0 0	0 3	0 1	0 1	0 0	0 0	0 1	0 1	0 2	0 1	0 0	0 10	0 0	0 1	0 1	0 0	0 1	0 4	0 3	0 3	0 2	0 0	0 0	0 2	0 1	0 2	0 1	1 0	0 9	1 7	0 2	0 9	2 11	0 8	2 9	0 4	4 7	1 5	0 6	0 3	1 4	0 13
tig00001299	1108138	CACTA	TACTC	0 1	0 2	0 2	0 0	0 0	0 3	0 1	0 1	0 0	0 0	0 1	0 1	0 2	0 1	0 0	0 10	0 0	0 1	0 1	0 0	0 1	0 4	0 3	0 3	0 2	0 0	0 0	0 2	0 1	0 2	0 1	0 0	4 9	1 7	1 2	3 9	5 11	1 8	0 9	0 4	0 7	3 5	0 6	2 3	2 4	1 13
tig00001299	1108146	A	C	0 1	0 2	0 3	0 0	0 0	0 3	0 1	0 1	0 0	0 0	0 1	0 1	0 2	0 2	0 0	0 9	0 0	0 2	0 2	0 1	0 1	0 3	0 5	0 5	0 2	0 0	0 0	0 5	0 1	0 2	0 1	0 1	0 6	0 2	0 1	5 3	0 13	0 6	0 3	0 0	0 7	0 6	0 0	0 4	0 3	0 2
tig00001299	1108146	ATATTATTATTTG	CTATTATTATTTA	0 1	0 2	0 3	0 0	0 0	0 3	0 1	0 1	0 0	0 0	0 1	0 1	0 2	0 2	0 0	0 9	0 0	0 2	0 2	0 1	0 1	0 3	0 5	0 5	0 2	0 0	0 0	0 5	0 1	0 2	0 1	0 1	9 6	4 2	1 1	3 3	5 13	3 6	6 3	1 0	3 7	1 6	4 0	2 4	1 3	5 2
tig00001299	1108151	A	G	0 1	0 2	0 3	0 0	0 0	0 3	0 1	0 1	0 0	0 0	0 1	0 1	0 2	0 2	0 0	0 9	0 0	0 2	0 2	0 1	0 1	0 3	0 5	0 5	0 2	0 0	0 0	0 5	0 1	0 2	0 1	0 1	0 6	1 2	0 1	1 3	5 13	4 6	3 3	2 0	4 7	4 6	2 0	1 4	3 3	7 2
tig00001299	1108161	T	C	0 3	0 4	0 3	0 0	0 0	0 3	0 1	0 1	0 2	0 0	0 1	0 2	0 3	0 2	0 0	0 9	0 0	0 4	0 2	0 1	0 1	0 5	0 5	0 5	0 3	0 0	0 0	0 7	0 1	3 2	0 1	0 0	0 16	0 10	0 3	0 15	0 24	0 17	0 11	0 7	0 16	0 9	0 10	0 6	0 11	0 17
tig00001299	1108168	AA	TT	0 2	0 5	0 5	0 0	0 0	0 3	0 1	0 1	0 2	0 1	0 1	0 2	0 4	0 2	0 0	0 10	0 0	0 3	0 2	0 2	0 1	0 4	0 6	0 7	0 3	0 0	0 1	0 9	0 2	0 6	0 1	0 1	0 7	0 5	0 1	0 7	0 32	0 10	0 13	0 6	0 14	0 10	0 4	0 6	0 13	0 12
tig00001299	1108169	A	T	1 2	0 5	0 5	0 0	0 0	0 3	0 1	0 1	0 2	0 1	0 1	0 2	0 4	0 2	0 0	0 10	0 0	1 3	0 2	0 2	0 1	1 4	0 6	0 7	0 3	0 0	0 1	0 9	0 2	0 6	0 1	0 1	14 7	8 5	2 1	11 7	10 32	10 10	9 13	5 6	6 14	8 10	8 4	5 6	2 13	9 12
tig00001299	1108176	TA	CT	0 5	0 5	0 6	0 0	0 0	0 2	0 1	0 1	0 2	0 2	0 1	0 2	0 6	0 3	0 0	0 10	0 0	0 4	0 4	0 2	0 1	0 5	0 6	0 7	0 3	0 0	0 1	0 9	0 4	0 6	0 0	0 0	0 21	0 13	0 3	0 21	0 43	0 22	0 22	0 12	0 20	0 20	0 14	0 12	0 15	0 24
tig00001299	1108187	A	T	0 5	0 5	0 5	0 0	0 0	0 2	0 1	0 1	0 2	0 3	0 1	0 2	0 10	0 3	0 0	0 11	0 0	0 5	0 4	0 3	0 2	0 6	0 5	0 7	0 3	0 0	0 1	0 9	0 6	0 5	0 0	0 1	0 23	0 15	0 6	0 23	0 51	0 27	0 26	0 14	0 30	0 21	0 15	0 16	0 18	0 25
tig00001299	1108190	T	A	0 6	0 5	0 5	0 0	0 0	0 2	0 1	0 1	0 2	0 3	0 1	0 2	0 11	0 3	0 0	1 11	0 0	0 5	0 4	0 3	0 2	0 6	1 5	0 8	0 3	0 0	0 1	0 9	0 7	0 5	0 0	0 1	0 26	2 13	0 7	3 20	4 49	0 26	5 20	4 10	1 31	0 21	1 15	2 14	0 18	2 24
tig00001299	1108199	G	A	0 6	0 4	0 4	0 1	0 0	0 2	0 1	0 1	0 2	0 3	0 0	0 1	0 14	0 3	0 0	0 8	0 0	0 2	0 3	0 1	0 2	0 6	0 6	0 6	0 3	0 0	0 0	0 9	0 7	0 5	0 0	0 1	4 23	1 12	0 9	4 16	12 38	8 20	9 16	6 5	13 23	7 17	5 16	3 12	12 9	10 20
tig00001299	1108200	CATAA	GATAG	0 5	0 5	0 4	0 1	0 0	0 1	0 1	0 1	0 2	0 3	0 0	0 1	0 13	0 3	0 0	0 10	0 0	0 5	0 4	0 3	0 2	0 6	0 7	0 7	0 2	0 0	0 1	0 10	0 7	0 1	0 0	0 1	0 28	0 14	0 7	0 22	0 50	0 29	0 28	0 15	0 36	0 24	0 22	0 18	0 21	0 31
tig00001299	1108213	A	G	0 6	0 4	0 4	0 1	0 0	0 1	0 1	0 1	0 2	0 4	0 1	0 4	0 14	0 4	0 0	0 7	0 0	0 5	0 4	0 3	0 2	0 5	0 6	0 6	0 2	0 0	0 2	0 11	0 8	0 4	0 1	0 2	6 25	0 20	1 12	5 18	0 60	0 34	1 35	0 20	1 37	3 26	0 31	2 19	0 23	0 38
tig00001299	1108214	TCATC	GCATT	0 5	0 3	0 4	0 1	0 0	0 1	0 0	0 0	0 2	0 4	0 1	0 4	0 14	0 2	0 0	0 5	0 0	0 4	0 4	0 3	0 1	0 4	0 5	0 5	0 0	0 0	0 2	0 6	0 7	0 3	0 1	0 2	8 23	5 15	0 14	1 20	10 45	8 26	9 23	7 13	6 32	10 19	9 21	3 18	11 12	12 26
tig00001299	1108218	C	T	0 5	0 3	0 4	0 1	0 0	0 1	1 0	0 0	0 2	0 4	0 1	0 4	0 14	1 2	0 0	1 5	0 0	0 4	0 4	0 3	1 1	1 4	1 5	0 5	2 0	0 0	0 2	5 6	1 7	1 3	0 1	0 2	0 23	0 15	0 14	1 20	0 45	0 26	0 23	0 13	0 32	0 19	0 21	0 18	0 12	0 26
tig00001299	1108221	T	C	4 2	1 2	3 1	0 1	0 0	0 1	0 1	0 0	0 2	3 1	0 1	0 4	9 5	0 3	0 0	4 2	0 0	2 2	2 2	3 0	0 2	0 5	1 5	3 2	0 2	0 0	2 0	5 6	3 5	0 4	0 4	0 2	6 25	1 20	2 13	5 19	8 53	5 31	1 40	0 19	15 25	3 28	3 32	2 18	6 18	6 34
tig00001299	1108228	T	A	0 6	0 3	0 4	0 1	0 0	0 1	0 0	0 0	0 2	0 4	0 2	0 5	0 15	0 3	0 1	0 6	0 0	0 4	0 4	0 3	0 1	0 3	0 6	0 5	0 2	0 0	0 2	0 11	0 8	0 4	0 7	0 2	0 30	0 20	0 14	0 23	0 62	0 39	0 41	0 20	0 40	0 31	9 28	0 20	0 24	0 42
tig00001299	1108231	TAAAAAACTG	CAAAAAACTA	0 4	0 3	0 4	0 1	0 0	0 0	0 0	0 0	0 1	0 3	0 1	0 2	0 11	0 1	0 1	0 4	0 0	0 4	0 3	0 2	0 0	0 2	0 1	0 5	0 0	0 0	0 2	0 7	0 5	0 0	0 0	0 0	0 21	0 11	0 8	0 13	0 25	0 19	0 15	0 3	0 22	0 11	0 20	0 11	0 8	0 19
tig00001299	1108231	T	TA	0 4	0 3	0 4	0 1	0 0	0 0	0 0	0 0	0 1	0 3	0 1	0 2	0 11	0 1	0 1	0 4	0 0	0 4	0 3	0 2	0 0	0 2	0 1	0 5	0 0	0 0	0 2	0 7	0 5	0 0	0 0	0 0	0 21	0 11	0 8	0 13	0 25	0 19	0 15	0 3	0 22	0 11	0 20	0 11	0 8	0 19
tig00001299	1108232	AAAAAAC	TAAAAAA	0 4	0 3	0 4	0 1	0 0	0 0	0 0	0 0	0 1	0 3	0 1	0 2	0 11	0 1	0 1	0 4	0 0	0 4	0 3	0 2	0 0	0 2	0 1	0 5	0 0	0 0	0 2	0 7	0 5	0 0	0 0	0 0	0 21	0 11	0 8	0 13	0 25	0 19	0 15	0 3	0 22	0 11	0 20	0 11	0 8	0 19
tig00001299	1108232	AAAAAACTGC	TAAAAACTGT	0 4	0 3	0 4	0 1	0 0	0 0	0 0	0 0	0 1	0 3	0 1	0 2	0 11	0 1	0 1	0 4	0 0	0 4	0 3	0 2	0 0	0 2	0 1	0 5	0 0	0 0	0 2	0 7	0 5	0 0	0 0	0 0	7 21	4 11	0 8	3 13	11 25	9 19	10 15	6 3	6 22	7 11	10 20	3 11	8 8	12 19
tig00001299	1108236	AACTGC	CACTGT	0 4	0 3	0 4	0 1	0 0	0 0	0 0	0 0	0 1	0 3	0 1	0 2	0 11	0 1	0 1	0 4	0 0	0 4	0 3	0 2	0 0	0 2	0 1	0 5	0 0	0 0	0 2	0 7	0 5	0 0	0 0	0 0	0 21	0 11	0 8	0 13	0 25	0 19	0 15	0 3	0 22	0 11	0 20	0 11	0 8	0 19
tig00001299	1108240	G	A	0 4	0 3	0 4	0 1	0 0	0 0	0 0	0 0	0 1	0 3	0 1	0 2	0 11	0 1	0 1	0 4	0 0	0 4	0 3	0 2	0 0	0 2	1 1	0 5	0 0	0 0	0 2	0 7	0 5	0 0	0 0	0 0	0 21	0 11	0 8	0 13	0 25	0 19	0 15	0 3	0 22	0 11	0 20	1 11	0 8	1 19
tig00001299	1108241	C	T	1 4	0 3	0 4	0 1	0 0	0 0	0 0	0 0	1 1	1 3	1 1	3 2	3 11	2 1	0 1	0 4	0 0	0 4	1 3	0 2	0 0	0 2	1 1	0 5	2 0	0 0	0 2	0 7	3 5	0 0	7 0	0 0	0 21	0 11	3 8	2 13	0 25	2 19	1 15	0 3	0 22	2 11	0 20	0 11	0 8	1 19
tig00001299	1108245	T	A	0 7	0 4	0 3	0 2	0 2	0 1	0 1	0 1	0 5	0 7	0 4	0 8	0 15	0 3	0 1	0 4	0 2	0 3	0 4	0 4	0 1	0 2	0 2	0 4	0 2	0 1	0 2	0 11	0 8	0 2	0 8	0 2	0 38	0 18	0 18	0 27	0 66	0 41	0 41	0 20	0 42	0 32	0 40	0 25	0 23	0 42
tig00001299	1108246	A	C	0 4	0 0	0 3	0 0	0 0	0 0	0 0	0 0	0 0	0 4	0 2	0 3	0 11	0 1	0 1	0 4	0 0	0 2	0 2	0 2	0 0	0 0	0 1	0 3	0 0	0 0	0 2	0 4	0 5	0 0	0 0	0 0	0 33	0 17	0 12	0 18	0 36	0 32	0 31	0 11	0 26	0 27	0 34	0 21	0 17	0 33
tig00001299	1108246	AT	CC	0 4	0 0	0 3	0 0	0 0	0 0	0 0	0 0	0 0	0 4	0 2	0 3	0 11	0 1	0 1	0 4	0 0	0 2	0 2	0 2	0 0	0 0	0 1	0 3	0 0	0 0	0 2	0 4	0 5	0 0	0 0	0 0	6 33	1 17	2 12	5 18	8 36	8 32	1 31	0 11	14 26	3 27	4 34	2 21	6 17	6 33
tig00001299	1108247	T	C	3 4	3 0	0 3	3 0	2 0	1 0	1 0	2 0	4 0	3 4	2 2	6 3	4 11	1 1	0 1	0 4	2 0	1 2	1 2	4 2	2 0	2 0	1 1	1 3	0 0	1 0	0 2	7 4	3 5	1 0	8 0	2 0	0 33	2 17	4 12	5 18	14 36	1 32	5 31	8 11	1 26	2 27	2 34	2 21	0 17	3 33
tig00001299	1108260	T	C	0 0	0 0	0 0	0 0	0 0	0 0	0 0	0 0	0 0	0 0	0 0	0 0	0 0	0 0	0 0	0 0	0 0	0 0	0 0	0 0	0 0	0 0	0 0	0 0	0 0	0 0	0 0	0 0	0 0	0 0	0 0	0 0	12 0	4 0	0 0	4 0	12 0	7 0	10 0	6 0	3 0	3 0	10 0	3 0	9 0	9 0
tig00001299	1108272	C	T	0 2	0 4	0 1	0 2	0 3	0 3	0 2	0 4	0 5	0 13	0 8	0 11	0 13	0 8	0 1	0 3	0 5	0 3	0 2	0 2	0 6	0 1	0 4	0 2	0 2	0 3	0 4	0 8	0 8	0 1	0 8	0 0	1 41	0 15	5 17	0 24	0 35	1 29	0 33	0 10	0 17	0 24	0 24	0 19	0 24	0 31
tig00001299	1108273	G	A	0 2	0 4	0 1	0 2	0 3	0 3	0 2	0 4	0 5	0 13	0 8	0 11	0 13	0 8	0 1	0 3	0 5	0 3	0 2	5 2	0 6	0 1	0 4	0 2	0 2	1 3	0 4	0 8	0 8	0 1	0 8	0 0	0 41	0 15	1 17	0 24	0 35	0 29	0 33	0 10	0 17	0 24	0 24	0 19	0 24	0 31
tig00001299	1108276	G	A	4 2	0 4	0 1	1 2	0 3	0 3	0 2	0 4	0 5	0 13	1 8	0 11	0 13	0 8	1 1	0 3	0 5	0 3	0 2	0 2	0 6	0 1	0 4	0 2	0 2	0 3	0 4	0 8	0 8	0 1	0 8	0 0	0 41	0 15	0 17	0 24	18 35	6 29	0 33	3 10	3 17	0 24	8 24	0 19	0 24	0 31
tig00001299	1108276	G	T	0 2	0 4	0 1	0 2	0 3	0 3	0 2	0 4	0 5	0 13	0 8	0 11	0 13	0 8	0 1	0 3	0 5	0 3	0 2	0 2	0 6	0 1	0 4	0 2	0 2	0 3	0 4	0 8	0 8	0 1	0 8	0 0	0 41	0 15	0 17	0 24	0 35	0 29	0 33	0 10	0 17	0 24	0 24	0 19	0 24	0 31
tig00001299	1108277	C	T	0 2	0 4	0 1	0 2	0 3	0 3	0 2	0 4	0 5	0 13	0 8	0 11	0 13	0 8	0 1	0 3	0 5	0 3	0 2	0 2	0 6	0 1	0 4	0 2	0 2	0 3	0 4	0 8	0 8	1 1	0 8	2 0	1 41	0 15	0 17	0 24	0 35	0 29	0 33	0 10	8 17	0 24	0 24	0 19	0 24	1 31
tig00001299	1108278	G	A	2 2	0 4	2 1	0 2	0 3	0 3	0 2	0 4	0 5	0 13	0 8	0 11	0 13	0 8	0 1	0 3	0 5	0 3	0 2	0 2	0 6	1 1	0 4	0 2	0 2	0 3	0 4	0 8	0 8	0 1	0 8	0 0	0 41	0 15	0 17	0 24	0 35	0 29	0 33	0 10	0 17	0 24	0 24	0 19	0 24	0 31
tig00001299	1108283	AGTTCCATCT	GATTCCCTCC	0 0	0 0	0 0	0 0	0 0	0 0	0 0	0 0	0 0	0 0	0 0	0 0	0 0	0 0	0 0	0 0	0 0	0 0	0 0	5 0	0 0	0 0	0 0	0 0	0 0	2 0	0 0	0 0	0 0	0 0	0 0	0 0	0 0	0 0	0 0	0 0	0 0	0 0	0 0	0 0	0 0	0 0	0 0	0 0	0 0	0 0
tig00001299	1108283	AGTTCCATCT	GGTTCCATCC	0 0	0 0	0 0	0 0	0 0	0 0	0 0	0 0	0 0	0 0	0 0	0 0	0 0	0 0	0 0	0 0	0 0	0 0	0 0	0 0	0 0	0 0	0 0	0 0	0 0	0 0	0 0	0 0	0 0	0 0	0 0	0 0	19 0	11 0	10 0	3 0	14 0	5 0	17 0	2 0	10 0	6 0	16 0	18 0	7 0	13 0
tig00001299	1108283	AGTTCCATCTTGAG	GGTTCCATCCTGAA	0 0	0 0	0 0	0 0	0 0	0 0	0 0	0 0	0 0	0 0	0 0	0 0	0 0	0 0	0 0	0 0	0 0	0 0	0 0	0 0	0 0	0 0	0 0	0 0	0 0	0 0	0 0	0 0	0 0	0 0	0 0	0 0	0 0	0 0	0 0	0 0	0 0	10 0	0 0	0 0	0 0	0 0	0 0	0 0	0 0	0 0
tig00001299	1108283	AGTTCCA	GGTTCCC	0 0	0 0	0 0	0 0	0 0	0 0	0 0	0 0	0 0	0 0	0 0	0 0	0 0	0 0	0 0	0 0	0 0	0 0	0 0	0 0	0 0	0 0	0 0	0 0	0 0	0 0	0 0	0 0	3 0	0 0	0 0	0 0	13 0	6 0	1 0	4 0	11 0	5 0	10 0	7 0	6 0	13 0	13 0	0 0	6 0	5 0
tig00001299	1108283	AGTTCCATCT	GGTTCCCTCC	2 0	6 0	1 0	1 0	2 0	4 0	3 0	2 0	1 0	15 0	7 0	3 0	5 0	7 0	2 0	1 0	5 0	3 0	2 0	1 0	6 0	2 0	5 0	4 0	4 0	3 0	5 0	1 0	2 0	0 0	0 0	0 0	0 0	0 0	0 0	0 0	0 0	1 0	0 0	0 0	0 0	0 0	0 0	0 0	0 0	0 0
tig00001299	1108283	AGTTCCATCTTGA	GGTTTCTCTTGG	0 0	0 0	0 0	0 0	0 0	0 0	0 0	0 0	0 0	0 0	0 0	0 0	0 0	0 0	0 0	0 0	0 0	0 0	0 0	0 0	0 0	0 0	0 0	0 0	0 0	0 0	0 0	0 0	0 0	0 0	0 0	0 0	0 0	0 0	0 0	0 0	0 0	0 0	0 0	0 0	0 0	0 0	0 0	0 0	0 0	0 0
tig00001299	1108283	AGTTCCATCT	TGTTCTATCC	0 0	0 0	0 0	0 0	0 0	0 0	0 0	0 0	0 0	0 0	0 0	0 0	0 0	0 0	0 0	0 0	0 0	0 0	0 0	0 0	0 0	0 0	0 0	0 0	0 0	0 0	0 0	0 0	0 0	0 0	0 0	0 0	0 0	0 0	0 0	7 0	0 0	0 0	0 0	0 0	0 0	0 0	0 0	0 0	0 0	0 0
tig00001299	1108287	CCATCT	TCCTCC	0 0	0 0	0 0	0 0	0 0	0 0	0 0	0 0	0 0	0 0	0 0	0 0	0 0	0 0	0 0	0 0	0 0	0 0	0 0	0 0	0 0	0 0	0 0	0 0	0 0	0 0	0 0	0 0	0 0	1 0	0 0	2 0	0 0	0 0	0 0	0 0	0 0	0 0	0 0	0 0	0 0	0 0	0 0	0 0	0 0	0 0
tig00001299	1108289	ATCT	CTCC	5 0	0 0	0 0	1 0	0 0	0 0	0 0	3 0	4 0	0 0	1 0	9 0	0 0	0 0	0 0	0 0	0 0	0 0	0 0	0 0	0 0	0 0	0 0	0 0	0 0	0 0	0 0	6 0	0 0	0 0	0 0	0 0	0 0	0 0	0 0	0 0	0 0	0 0	0 0	0 0	0 0	0 0	0 0	0 0	0 0	0 0
tig00001299	1108297	G	A	8 1	8 1	2 3	2 0	4 0	6 1	4 0	7 1	7 0	16 1	9 3	14 3	6 2	8 1	2 1	3 0	7 0	5 0	5 1	7 1	6 0	6 0	5 1	5 1	4 0	5 1	7 1	7 1	4 10	0 3	0 0	0 3	0 34	0 24	2 14	0 19	2 34	0 39	1 34	2 9	0 34	0 30	0 36	0 23	0 20	1 29
tig00001299	1108300	G	A	0 10	0 10	0 5	0 2	0 4	0 7	0 5	0 8	0 7	0 17	0 13	0 18	0 9	0 9	0 3	0 3	0 8	0 4	0 8	0 8	0 6	0 9	0 6	0 6	0 5	0 7	0 8	0 8	0 15	0 3	0 0	0 3	0 34	0 24	3 13	0 21	0 35	3 36	1 34	0 12	0 34	2 28	0 37	0 23	0 20	2 27
tig00001299	1108305	ACCC	GCCT	3 0	4 0	1 0	1 0	3 0	2 0	5 0	3 0	2 0	6 0	5 0	4 0	6 0	7 0	2 1	2 0	3 0	4 0	6 0	0 0	2 0	9 0	5 0	4 0	5 0	4 0	3 0	1 0	4 0	0 0	0 0	0 0	0 0	0 0	0 0	0 0	0 9	0 9	0 0	0 0	0 9	0 8	0 11	0 0	0 0	0 0
tig00001299	1108305	ACCCAAA	TCCCAAG	0 0	0 0	0 0	0 0	0 0	0 0	0 0	0 0	0 0	0 0	0 0	0 0	0 0	0 0	0 1	0 0	0 0	0 0	0 0	0 0	0 0	0 0	0 0	0 0	0 0	0 0	0 0	0 0	0 0	1 0	0 0	2 0	0 0	0 0	0 0	0 0	0 9	0 9	2 0	0 0	9 9	0 8	0 11	0 0	0 0	0 0
tig00001299	1108308	C	T	6 0	5 0	2 0	1 0	0 0	2 0	0 0	4 0	5 0	10 0	4 0	12 0	0 0	0 0	0 1	0 0	4 0	0 0	0 0	6 0	4 0	0 0	0 0	0 0	0 0	2 0	3 0	6 0	6 0	0 0	0 0	0 0	29 0	21 0	13 0	17 0	15 9	16 9	30 0	4 0	12 9	10 8	20 11	21 0	16 0	24 0
tig00001299	1108308	CAAAC	TAAAT	0 0	0 0	0 0	0 0	0 0	0 0	0 0	0 0	0 0	0 0	0 0	0 0	0 0	0 0	0 1	0 0	0 0	0 0	0 0	0 0	0 0	0 0	0 0	0 0	0 0	0 0	0 0	0 0	0 0	0 0	0 0	0 0	0 0	0 0	0 0	0 0	0 9	0 9	0 0	0 0	0 9	0 8	0 11	0 0	0 0	0 0
tig00001299	1108311	AC	GT	0 0	0 0	0 0	0 0	0 0	0 0	0 0	0 0	0 0	0 0	0 0	0 0	0 0	0 0	0 1	0 0	0 0	0 0	0 0	0 0	0 0	0 0	0 0	0 0	0 0	0 0	0 0	0 0	0 0	0 0	0 0	0 0	0 0	0 0	0 0	0 0	0 9	0 9	0 0	0 0	0 9	0 8	0 11	0 0	0 0	0 0
tig00001299	1108313	G	A	0 0	0 0	0 0	0 0	0 0	0 0	0 0	0 0	0 0	0 0	0 0	0 0	0 0	0 0	0 1	0 0	0 0	0 0	0 0	0 0	0 0	0 0	0 0	0 0	0 0	0 0	0 0	0 0	3 0	0 0	0 0	0 0	0 0	0 0	0 0	4 0	0 9	0 9	0 0	0 0	0 9	0 8	0 11	0 0	0 0	0 0
tig00001299	1108317	C	T	0 9	0 11	1 5	0 2	1 5	0 8	0 5	0 8	0 7	0 16	0 11	0 19	0 8	5 3	0 3	0 4	0 9	0 6	0 7	0 8	0 9	0 10	0 6	0 6	0 5	0 8	0 9	0 11	0 15	0 3	0 0	0 3	0 33	0 29	0 22	0 26	0 43	0 38	2 36	0 8	11 27	0 32	0 40	0 26	0 18	0 34
tig00001299	1108322	CACTTGGCTTGCTTCCTCTTGGCTGC	AACTTGGCTTGCTTCCTCTTGGCTG	0 0	0 0	0 0	0 0	0 0	0 0	0 0	0 0	0 0	0 0	0 0	0 0	0 0	0 0	0 0	0 0	0 0	0 0	0 0	0 0	0 0	0 0	0 0	0 0	0 0	0 0	0 0	0 0	0 5	0 0	0 0	0 0	14 0	13 0	10 0	5 6	3 7	0 0	14 0	0 0	0 0	4 0	7 7	8 8	3 0	5 0
tig00001299	1108323	ACTTGGCTTGCTTCCTCTTGGCTG	GCTTGGCTTGCTTCCTTTTGACTA	0 0	0 0	0 0	0 0	0 0	0 0	0 0	0 0	0 0	0 0	0 0	0 0	0 0	0 0	0 0	0 0	0 0	0 0	0 0	0 0	0 0	0 0	0 0	0 0	0 0	0 0	0 0	0 0	0 5	0 0	0 0	0 0	0 0	0 0	0 0	0 6	0 7	4 0	0 0	0 0	2 0	0 0	0 7	0 8	0 0	0 0
tig00001299	1108323	ACTTGGCT	GCTTTGGA	0 0	0 0	0 0	0 0	0 0	0 0	0 0	0 0	0 0	0 0	0 0	0 0	0 0	0 0	0 0	0 0	0 0	0 0	0 0	0 0	0 0	0 0	0 0	0 0	0 0	0 0	0 0	0 0	0 5	0 0	0 0	2 0	0 0	0 0	0 0	0 6	0 7	0 0	0 0	0 0	0 0	0 0	0 7	0 8	0 0	0 0
tig00001299	1108328	G	A	0 0	0 0	0 0	0 0	0 0	0 0	0 0	0 0	0 0	0 0	0 0	0 0	0 0	0 0	0 0	0 0	0 0	0 0	0 0	0 0	0 0	0 0	0 0	0 0	0 0	0 0	0 0	0 0	0 5	0 0	0 0	0 0	0 0	0 0	0 0	0 6	0 7	0 0	0 0	0 0	0 0	0 0	0 7	0 8	0 0	0 0
tig00001299	1108333	CTTCCTCTTG	TTTCCTCTTA	0 0	0 0	0 0	0 0	0 0	0 0	0 0	0 0	0 0	0 0	0 0	0 0	0 0	0 0	0 0	0 0	0 0	0 0	0 0	0 0	0 0	0 0	0 0	0 0	0 0	0 0	0 0	0 0	0 5	0 0	0 0	0 0	0 0	0 0	0 0	0 6	0 7	0 0	0 0	0 0	0 0	0 0	0 7	0 8	0 0	0 0
tig00001299	1108339	CTTGGCTG	TTTGACTA	0 0	0 0	0 0	0 0	0 0	0 0	0 0	0 0	0 0	0 0	0 0	0 0	0 0	0 0	0 0	0 0	0 0	0 0	0 0	0 0	0 0	0 0	0 0	0 0	0 0	0 0	0 0	0 0	0 5	0 0	0 0	0 0	13 0	8 0	4 0	5 6	8 7	0 0	10 0	2 0	4 0	14 0	16 7	3 8	8 0	10 0
tig00001299	1108339	CTTGGCTGC	TTTGACTAT	0 0	0 0	0 0	0 0	0 0	0 0	0 0	0 0	0 0	0 0	0 0	0 0	0 0	0 0	0 0	0 0	0 0	0 0	0 0	0 0	0 0	0 0	0 0	0 0	0 0	0 0	0 0	0 0	0 5	0 0	0 0	0 0	0 0	0 0	0 0	0 6	0 7	0 0	0 0	0 0	0 0	0 0	0 7	0 8	0 0	0 0
tig00001299	1108344	CTGCAGTC	TTGCAGTT	0 0	0 0	0 0	0 0	0 0	0 0	0 0	0 0	0 0	0 0	0 0	0 0	0 0	0 0	0 0	0 0	2 0	0 0	1 0	0 0	0 0	0 0	2 0	1 0	3 0	0 0	0 0	0 0	0 5	0 0	0 0	0 0	0 0	0 0	0 0	0 6	0 7	0 0	0 0	0 0	0 0	0 0	0 7	0 8	0 0	0 0
tig00001299	1108347	CAGTC	TAGTT	0 0	0 0	0 0	0 0	0 0	0 0	0 0	0 0	0 0	0 0	0 0	0 0	0 0	0 0	0 0	0 0	0 0	0 0	0 0	0 0	0 0	0 0	3 0	3 0	2 0	0 0	1 0	2 0	0 5	0 0	0 0	0 0	0 0	0 0	0 0	0 6	0 7	0 0	0 0	0 0	0 0	0 0	0 7	0 8	0 0	0 0
tig00001299	1108349	G	A	0 0	0 0	0 0	0 0	0 0	0 0	0 0	0 0	0 0	0 0	0 0	0 0	0 0	0 0	0 0	0 0	0 0	0 0	0 0	0 0	0 0	0 0	0 0	0 0	0 0	0 0	0 0	0 0	0 5	0 0	0 0	0 0	0 0	0 0	0 0	0 6	0 7	14 0	0 0	0 0	11 0	0 0	0 7	2 8	0 0	0 0
tig00001299	1108351	C	T	5 0	8 0	4 0	0 0	2 0	6 0	4 0	4 0	4 0	12 0	7 0	12 0	5 0	4 0	3 0	4 0	5 0	1 0	2 0	1 0	7 0	9 0	0 0	0 0	0 0	2 0	2 0	5 0	3 5	0 0	0 0	0 0	0 0	0 0	0 0	0 6	0 7	0 0	0 0	0 0	0 0	0 0	0 7	0 8	0 0	0 0
tig00001299	1108352	C	T	0 5	0 10	0 6	0 2	0 3	0 9	0 5	0 5	0 4	0 14	0 9	0 17	0 14	0 5	0 4	0 12	0 8	0 5	0 4	0 5	0 8	0 8	0 7	0 9	0 8	0 3	0 7	0 11	0 10	0 2	0 0	0 3	0 37	0 27	0 27	0 30	8 32	0 48	4 32	1 14	0 43	0 27	0 42	0 29	0 15	0 26
tig00001299	1108354	A	T	0 5	0 11	0 6	0 2	0 3	0 9	0 5	0 5	0 4	0 15	0 9	0 17	0 14	0 4	0 4	0 12	0 8	0 5	0 4	0 5	0 7	0 8	0 7	0 9	0 8	0 3	0 7	0 11	0 10	0 2	0 0	0 3	0 37	0 23	0 24	0 30	0 37	0 55	0 35	0 15	0 38	5 19	0 45	0 30	0 15	0 32
tig00001299	1108359	CAC	TAT	0 4	0 9	0 5	0 2	0 3	0 9	0 5	0 3	0 3	0 8	0 7	0 13	0 6	0 3	0 2	0 11	0 7	0 5	0 3	0 4	0 7	0 7	0 6	0 8	0 7	0 3	0 7	0 10	0 8	0 1	0 0	0 0	0 11	0 9	0 4	0 17	0 19	0 46	0 12	0 5	0 26	0 20	0 31	0 18	0 10	0 23
tig00001299	1108361	C	G	0 4	0 9	1 5	0 2	0 3	0 9	0 5	0 3	0 3	0 8	0 7	1 13	0 6	0 3	0 2	0 11	0 7	0 5	0 3	0 4	0 7	0 7	0 6	0 8	0 7	0 3	0 7	0 10	0 8	1 1	0 0	3 0	0 11	0 9	4 4	4 17	8 19	8 46	5 12	2 5	1 26	2 20	5 31	0 18	0 10	2 23
tig00001299	1108361	C	T	0 4	0 9	0 5	0 2	0 3	0 9	0 5	0 3	0 3	0 8	0 7	0 13	0 6	0 3	0 2	0 11	0 7	0 5	0 3	0 4	0 7	0 7	0 6	0 8	0 7	0 3	0 7	0 10	0 8	0 1	0 0	0 0	18 11	17 9	11 4	9 17	5 19	0 46	15 12	0 5	2 26	5 20	7 31	13 18	3 10	5 23
tig00001299	1108366	T	C	0 4	0 8	0 4	0 2	0 1	0 9	0 4	0 2	0 1	0 6	0 5	0 13	0 5	0 0	0 3	0 8	0 6	0 3	0 3	0 3	0 5	0 7	0 4	0 6	0 6	0 3	0 6	0 7	0 6	0 1	0 0	3 0	8 25	0 23	4 17	8 25	4 29	25 27	10 23	7 6	10 23	5 21	14 28	5 26	1 13	8 17
tig00001299	1108371	T	C	0 4	0 7	0 4	0 2	0 2	0 7	0 4	0 2	0 0	0 6	0 4	0 11	0 13	0 0	0 3	0 11	0 6	0 5	0 3	0 3	0 5	0 6	0 5	0 8	0 6	0 2	0 6	0 9	0 6	0 1	0 0	0 3	0 34	0 22	0 23	0 30	0 29	0 59	0 31	0 12	0 39	0 26	0 37	0 29	0 14	0 24
tig00001299	1108377	GGA	AGG	0 1	0 3	0 3	0 0	0 1	0 4	0 1	0 0	0 0	0 4	0 1	0 2	0 4	0 0	0 2	0 6	0 5	0 1	0 1	0 0	0 5	0 1	0 3	0 3	0 3	0 0	0 3	0 1	0 0	0 0	0 0	0 0	0 7	0 0	1 2	0 2	0 0	22 6	0 2	0 3	13 10	0 2	0 2	2 2	0 2	0 0
tig00001299	1108378	GA	AG	0 1	0 3	0 3	0 0	0 1	0 4	0 1	0 0	0 0	0 4	0 1	0 2	0 4	0 0	0 2	0 6	0 5	0 1	0 1	0 0	0 5	0 1	0 3	0 3	0 3	0 0	0 3	0 1	0 0	0 0	0 0	0 0	16 7	16 0	11 2	9 2	4 0	0 6	11 2	0 3	0 10	3 2	4 2	11 2	5 2	10 0
tig00001299	1108379	A	G	0 1	0 3	0 3	0 0	0 1	0 4	0 1	0 0	0 0	0 4	0 1	4 2	0 4	0 0	0 2	2 6	0 5	3 1	0 1	2 0	0 5	1 1	1 3	0 3	0 3	0 0	1 3	3 1	1 0	1 0	0 0	0 0	4 7	5 0	1 2	7 2	8 0	0 6	4 2	3 3	9 10	17 2	7 2	3 2	5 2	5 0
tig00001299	1108379	ACACTCAC	GCACTCAT	1 1	0 3	0 3	1 0	0 1	0 4	0 1	0 0	0 0	0 4	0 1	0 2	0 4	0 0	0 2	0 6	0 5	0 1	0 1	0 0	0 5	0 1	0 3	0 3	0 3	0 0	0 3	0 1	0 0	0 0	0 0	0 0	0 7	0 0	0 2	0 2	0 0	0 6	0 2	0 3	0 10	0 2	0 2	0 2	0 2	0 0
tig00001299	1108379	ACACTCA	GCACTCG	0 1	0 3	0 3	0 0	0 1	0 4	0 1	0 0	0 0	0 4	0 1	0 2	0 4	0 0	0 2	0 6	0 5	0 1	0 1	0 0	0 5	0 1	0 3	0 3	0 3	0 0	0 3	0 1	0 0	0 0	0 0	0 0	0 7	0 0	0 2	0 2	7 0	0 6	0 2	0 3	0 10	0 2	0 2	5 2	0 2	0 0
tig00001299	1108379	ACAC	GCAT	0 1	0 3	0 3	0 0	0 1	0 4	0 1	0 0	0 0	0 4	0 1	0 2	0 4	0 0	0 2	0 6	0 5	0 1	0 1	0 0	0 5	0 1	0 3	0 3	0 3	0 0	0 3	0 1	0 0	0 0	0 0	0 0	0 7	0 0	0 2	0 2	0 0	0 6	0 2	0 3	0 10	0 2	0 2	0 2	0 2	0 0
tig00001299	1108391	ATGGC	CTGGG	0 0	0 0	0 0	0 1	0 2	0 1	0 0	0 1	0 0	0 0	0 0	0 1	0 0	0 0	0 0	0 5	0 0	0 1	0 0	0 1	0 0	0 0	0 1	0 2	0 0	0 0	0 1	0 2	1 0	0 0	0 0	0 2	16 12	17 5	11 10	12 12	11 11	26 30	13 18	4 10	18 21	11 18	13 24	19 8	6 9	10 12
tig00001299	1108393	G	A	1 0	3 0	2 0	1 1	1 2	2 1	1 0	0 1	0 0	3 0	1 0	5 1	4 0	0 0	2 0	3 5	4 0	3 1	1 0	1 1	5 0	0 0	3 1	2 2	1 0	0 0	2 1	3 2	0 0	0 0	0 0	0 2	0 12	0 5	0 10	0 12	0 11	0 30	0 18	0 10	0 21	0 18	0 24	0 8	0 9	0 12
tig00001299	1108397	C	A	0 1	0 3	0 2	0 2	0 3	0 4	0 1	0 2	0 0	0 2	0 1	0 7	0 12	0 0	0 2	0 10	0 4	0 5	0 0	0 3	0 5	0 0	0 4	0 4	0 3	0 0	0 3	0 6	0 1	0 0	0 0	0 2	7 29	0 22	0 27	2 23	0 24	6 55	2 30	4 11	12 23	3 35	2 40	2 25	2 14	0 24
tig00001299	1108399	A	T	0 1	0 3	0 1	0 2	0 3	0 4	0 1	1 1	0 0	0 2	0 1	0 5	0 11	0 0	0 2	0 8	0 3	0 4	0 0	0 2	0 5	0 0	0 4	0 4	0 3	0 0	0 3	0 6	0 0	0 0	0 0	0 1	0 33	0 21	0 21	0 19	0 22	1 57	0 29	0 12	0 38	0 35	0 37	0 25	0 13	0 24
tig00001299	1108411	GGCT	AGCC	0 0	0 0	0 0	0 0	0 1	0 1	0 0	0 2	0 0	0 0	0 0	0 0	0 0	0 0	0 0	0 0	0 0	0 0	0 0	0 0	0 0	0 0	0 1	0 0	0 0	0 0	0 0	0 0	0 0	0 0	0 0	0 0	0 7	0 0	0 3	0 1	6 3	23 11	0 2	0 6	12 8	0 0	12 3	3 2	0 3	0 0
tig00001299	1108414	T	C	1 0	2 0	0 0	1 0	0 1	1 1	1 0	0 2	0 0	2 0	1 0	1 0	1 0	0 0	1 0	2 0	2 0	2 0	0 0	0 0	1 0	0 0	1 1	2 0	1 0	0 0	1 0	0 0	0 0	0 0	0 0	0 0	26 7	14 0	10 3	9 1	5 3	5 11	13 2	5 6	10 8	24 0	12 3	15 2	7 3	12 0
tig00001299	1108414	TTG	CTA	0 0	0 0	0 0	0 0	0 1	0 1	0 0	0 2	0 0	0 0	0 0	0 0	0 0	0 0	0 0	0 0	0 0	0 0	0 0	0 0	0 0	0 0	0 1	0 0	0 0	0 0	0 0	0 0	0 0	0 0	0 0	0 0	3 7	3 0	6 3	4 1	3 3	0 11	5 2	0 6	0 8	5 0	1 3	1 2	2 3	1 0
tig00001299	1108418	TAGGG	AAGGA	0 0	0 2	0 0	0 0	0 0	0 2	0 1	0 0	0 0	0 2	0 1	0 3	0 1	0 0	0 0	0 1	0 1	0 2	0 0	0 1	0 1	0 0	0 1	0 1	0 3	0 0	0 2	0 2	0 0	0 0	0 0	0 0	7 28	0 21	0 17	1 14	0 16	0 33	1 22	0 10	3 20	2 31	2 29	2 19	1 9	0 15
tig00001299	1108418	T	C	0 0	0 2	0 0	0 0	0 0	0 2	0 1	0 0	0 0	0 2	0 1	0 3	0 1	0 0	0 0	0 1	0 1	0 2	0 0	0 1	0 1	0 0	0 1	0 1	0 3	0 0	0 2	0 2	0 0	0 0	0 0	1 0	0 28	0 21	0 17	0 14	0 16	0 33	0 22	0 10	0 20	0 31	0 29	0 19	0 9	0 15
tig00001299	1108428	T	C	0 0	2 0	0 0	0 0	0 0	1 0	1 0	0 0	0 0	1 0	1 0	0 0	1 0	0 0	0 0	0 0	0 0	0 1	0 0	0 0	1 0	0 0	0 0	0 0	0 0	0 0	1 0	1 0	0 0	0 0	0 0	0 0	22 1	13 3	7 7	8 5	9 4	20 4	13 5	7 1	17 4	19 10	17 11	13 3	3 7	12 4
tig00001299	1108428	TC	CA	1 0	0 0	0 0	0 0	0 0	0 0	0 0	0 0	0 0	0 0	0 0	1 0	0 0	0 0	0 0	0 0	0 0	0 1	0 0	0 0	0 0	0 0	0 0	0 0	0 0	0 0	0 0	0 0	0 0	0 0	0 0	0 0	0 1	0 3	0 7	0 5	0 4	0 4	0 5	0 1	0 4	0 10	0 11	0 3	0 7	0 4
tig00001299	1108428	TCA	CCC	0 0	0 0	0 0	0 0	0 0	0 0	0 0	0 0	0 0	0 0	0 0	0 0	0 0	0 0	0 0	0 0	0 0	0 1	0 0	0 0	0 0	0 0	0 0	0 0	0 0	0 0	0 0	0 0	0 0	0 0	0 0	0 0	7 1	0 3	3 7	1 5	3 4	10 4	2 5	4 1	8 4	3 10	2 11	2 3	3 7	0 4
tig00001299	1108437	G	A	0 2	0 4	0 0	0 1	0 0	0 3	0 0	0 1	0 0	0 1	0 3	0 4	0 0	0 1	0 0	0 1	0 0	0 0	0 0	0 1	0 1	0 0	0 1	0 2	0 2	0 0	0 1	0 2	0 1	0 0	0 0	0 1	22 8	12 3	6 7	8 3	9 5	19 14	12 5	9 3	21 10	26 6	19 12	15 5	4 8	13 4
tig00001299	1108442	G	A	0 2	0 3	0 0	0 1	0 0	0 2	0 0	0 1	0 1	0 1	0 2	0 4	0 0	0 1	0 0	0 1	0 1	0 0	0 0	0 0	0 1	0 0	0 1	0 2	0 2	0 0	0 1	0 2	0 1	0 0	0 0	0 1	0 35	0 17	0 14	1 11	0 17	0 35	0 21	0 11	0 33	0 35	0 34	0 22	0 12	0 16
tig00001299	1108444	GTCTTGGTCACGGGT	ATCATGGTCACGGGC	0 0	0 0	0 0	0 0	0 0	0 0	0 0	0 0	0 0	0 0	0 0	0 0	0 0	0 0	0 0	0 0	0 0	0 0	0 0	0 0	0 0	0 0	0 0	0 0	0 0	0 0	0 0	0 0	0 0	0 0	0 0	0 0	0 0	0 0	0 0	0 0	0 0	0 0	0 0	0 0	0 0	0 0	0 0	0 0	0 0	0 0
tig00001299	1108447	TTGGTCACGGGT	ATGGCCACGGGC	0 0	2 0	0 0	0 0	0 0	1 0	0 0	0 0	0 0	0 0	0 0	0 0	0 0	1 0	0 0	0 0	0 0	0 0	0 0	0 0	0 0	0 0	0 0	0 0	0 0	0 0	0 0	0 0	0 0	0 0	0 0	0 0	0 0	0 0	0 0	0 0	0 0	0 0	0 0	0 0	0 0	0 0	0 0	0 0	0 0	0 0
tig00001299	1108447	TTGGT	CTGGC	0 0	0 0	0 0	0 0	0 0	0 0	0 0	0 0	0 0	0 0	0 0	0 0	0 0	0 0	0 0	0 0	0 0	0 0	0 0	0 0	0 0	0 0	0 0	0 0	0 0	0 0	0 0	0 0	0 0	0 0	0 0	0 0	0 0	0 0	0 0	2 0	0 0	2 0	0 0	0 0	0 0	0 0	0 0	0 0	0 0	0 0
tig00001299	1108447	TTGGTCACGGGT	CTGGCCACGGGC	0 0	0 0	0 0	0 0	0 0	0 0	0 0	0 0	0 0	0 0	0 0	0 0	0 0	0 0	0 0	0 0	0 0	0 0	0 0	0 0	1 0	0 0	1 0	0 0	0 0	0 0	0 0	0 0	0 0	0 0	0 0	0 0	0 0	0 0	0 0	0 0	0 0	0 0	0 0	0 0	0 0	0 0	0 0	0 0	0 0	0 0
tig00001299	1108447	TTGGTCAC	CTGGCCAT	0 0	0 0	0 0	0 0	0 0	0 0	0 0	0 0	0 0	0 0	0 0	0 0	0 0	0 0	0 0	0 0	0 0	0 0	0 0	0 0	0 0	0 0	0 0	0 0	0 0	0 0	0 0	0 0	0 0	0 0	0 0	0 0	2 0	2 0	4 0	4 0	2 0	1 0	2 0	1 0	4 0	5 0	5 0	3 0	4 0	1 0
tig00001299	1108447	TTGGTCACGGGT	CTGGTCACGAGC	0 0	0 0	0 0	0 0	0 0	0 0	0 0	0 0	0 0	0 0	0 0	0 0	0 0	0 0	0 0	0 0	0 0	0 0	0 0	0 0	0 0	0 0	0 0	0 0	0 0	0 0	0 0	0 0	0 0	0 0	0 0	0 0	20 0	8 0	6 0	5 0	2 0	0 0	11 0	7 0	0 0	14 0	6 0	9 0	3 0	5 0
tig00001299	1108447	TTGGTCACGGGT	CTGGTCACGGGC	0 0	0 0	0 0	0 0	0 0	0 0	0 0	0 0	0 0	0 0	0 0	0 0	0 0	0 0	0 0	0 0	0 0	0 0	0 0	0 0	0 0	0 0	0 0	0 0	0 0	0 0	0 0	0 0	0 0	0 0	0 0	0 0	0 0	0 0	0 0	0 0	4 0	19 0	0 0	0 0	8 0	0 0	12 0	1 0	1 0	3 0
tig00001299	1108458	T	C	0 0	0 0	0 0	0 0	0 0	0 0	0 0	0 0	0 0	0 0	0 0	0 0	0 0	0 0	0 0	0 0	0 0	0 0	0 0	0 0	0 0	0 0	0 0	0 0	0 0	0 0	0 0	0 0	0 0	0 0	0 0	0 0	0 0	0 0	0 0	0 0	0 0	0 0	0 0	0 0	0 0	0 0	0 0	0 0	0 0	0 0
tig00001299	1108460	G	A	0 3	0 4	0 1	0 2	0 0	0 1	0 0	0 1	0 1	0 1	0 2	0 5	0 0	0 2	0 0	0 0	0 1	0 0	0 2	0 3	0 1	0 2	0 1	0 3	0 0	0 0	0 1	0 2	0 1	0 0	0 1	0 0	0 24	0 14	0 14	0 11	0 15	0 36	0 15	0 7	0 23	0 27	0 27	0 14	0 8	0 12
tig00001299	1108467	TAA	CAC	0 0	2 0	0 0	0 0	0 0	1 0	0 0	0 0	0 0	0 0	0 0	1 0	0 0	1 0	0 0	0 0	0 0	0 0	0 0	0 0	1 0	0 0	1 0	0 0	0 0	0 0	0 0	0 0	0 0	1 0	0 0	0 0	23 0	13 0	6 0	10 0	12 0	29 0	16 0	7 0	9 0	19 0	29 0	15 0	10 0	11 0
tig00001299	1108467	TAACAC	CACCAT	2 0	3 0	1 0	2 0	0 0	1 0	0 0	0 0	2 0	0 0	2 0	2 0	0 0	2 0	0 0	0 0	2 0	0 0	2 0	3 0	0 0	1 0	1 0	5 0	0 0	0 0	1 0	1 0	1 0	0 0	0 0	0 0	0 0	0 0	0 0	0 0	0 0	0 0	0 0	0 0	0 0	0 0	0 0	0 0	0 0	0 0
tig00001299	1108467	TAA	CAT	0 0	0 0	0 0	0 0	0 0	0 0	0 0	0 0	0 0	0 0	0 0	0 0	0 0	0 0	0 0	0 0	0 0	0 0	0 0	0 0	0 0	0 0	0 0	0 0	0 0	0 0	0 0	0 0	0 0	0 0	0 0	0 0	0 0	0 0	0 0	0 0	0 0	0 0	0 0	0 0	12 0	9 0	0 0	0 0	0 0	0 0
tig00001299	1108469	A	C	0 0	0 0	0 0	0 0	0 0	0 0	0 0	0 0	0 0	0 0	0 0	0 0	0 0	0 0	0 0	0 0	0 0	0 0	0 0	0 0	0 0	0 0	0 0	0 0	0 0	0 0	0 0	0 0	0 0	0 0	0 0	0 0	0 0	0 0	0 0	0 0	0 0	0 0	0 0	0 0	0 0	0 0	0 0	0 0	0 0	0 0
tig00001299	1108487	A	G	0 8	0 9	0 1	0 4	0 3	0 4	0 2	0 3	0 7	0 11	0 8	0 10	0 2	0 10	0 1	0 6	0 7	0 3	0 11	0 9	0 4	0 6	0 5	0 10	0 1	0 3	0 6	0 10	1 3	0 1	0 1	0 0	22 2	11 9	3 6	2 7	13 2	25 10	16 4	7 3	17 3	20 9	22 9	11 11	7 4	10 9
tig00001299	1108490	C	T	0 8	0 9	0 1	0 4	0 3	0 4	0 2	0 4	0 7	0 11	0 10	0 11	0 2	0 12	0 1	0 6	0 7	0 3	0 11	0 10	0 4	0 6	0 5	0 11	0 1	0 3	0 6	0 10	0 5	0 1	0 1	0 0	0 24	0 20	0 9	0 8	0 15	0 35	0 20	0 10	0 20	0 30	6 26	1 22	0 11	0 19
tig00001299	1108495	C	T	0 9	0 9	0 1	0 4	0 3	0 4	0 2	0 4	0 7	0 11	0 10	0 11	0 2	0 12	0 1	0 6	0 7	0 3	0 11	0 10	0 4	0 6	0 5	0 11	0 1	0 3	0 6	0 10	0 5	0 2	0 1	0 0	20 1	11 9	2 7	2 6	4 11	0 34	16 1	6 3	0 20	13 13	8 24	7 5	7 4	10 3
tig00001299	1108496	C	T	0 9	0 9	0 1	0 4	0 3	0 4	0 2	0 4	0 7	0 11	0 10	0 11	0 2	0 12	0 1	0 6	0 7	0 3	0 11	0 10	0 4	0 6	0 5	0 11	0 1	0 3	0 6	0 10	0 5	0 2	0 0	0 0	0 20	0 12	0 5	0 4	0 13	0 30	0 15	0 7	0 16	0 20	0 22	0 8	0 7	0 12
tig00001299	1108496	CAAG	TAAA	0 9	0 9	0 1	0 4	0 3	0 4	0 2	0 4	0 7	0 11	0 10	0 11	0 2	0 12	0 1	0 6	0 7	0 3	0 11	0 10	0 4	0 6	0 5	0 11	0 1	0 3	0 6	0 10	0 5	0 2	0 0	0 0	1 20	7 12	2 5	4 4	1 13	4 30	1 15	3 7	3 16	5 20	8 22	4 8	4 7	2 12
tig00001299	1108497	A	C	0 9	0 9	0 1	0 4	0 3	0 4	0 2	0 4	0 7	0 11	0 10	0 11	0 2	0 12	0 1	0 6	0 7	0 3	0 11	0 10	0 4	0 6	0 5	0 11	0 1	0 3	0 6	0 10	0 5	0 2	0 0	0 0	0 20	0 12	0 5	0 4	0 13	0 30	0 15	0 7	0 16	0 20	0 22	0 8	0 7	0 12
tig00001299	1108501	C	T	4 5	0 9	0 1	0 4	0 3	0 4	0 2	1 3	1 6	0 11	0 10	6 5	0 2	0 12	0 1	0 6	0 7	0 3	0 11	0 10	0 4	0 6	0 5	0 11	0 1	0 3	0 6	5 5	0 5	0 2	0 1	0 0	0 22	0 21	0 9	0 8	0 14	0 34	0 17	0 9	0 21	0 25	0 32	0 7	0 11	0 15
tig00001299	1108502	C	A	2 7	4 5	1 0	3 1	0 3	1 3	2 0	0 4	5 2	5 6	4 6	2 9	1 1	8 4	0 1	4 2	2 5	1 2	5 6	2 8	1 3	1 5	1 3	7 4	0 1	0 3	5 1	2 8	1 4	0 2	0 1	0 0	0 23	0 22	0 9	0 8	0 14	0 36	0 17	0 10	0 21	0 27	1 33	0 14	0 7	0 8
tig00001299	1108502	C	T	0 7	0 5	0 0	0 1	0 3	0 3	0 0	0 4	0 2	0 6	0 6	0 9	0 1	0 4	0 1	0 2	0 5	0 2	0 6	0 8	0 3	0 5	0 3	0 4	0 1	0 3	0 1	0 8	0 4	0 2	0 1	0 0	0 23	0 22	0 9	0 8	0 14	0 36	0 17	0 10	0 21	0 27	0 33	0 14	4 7	7 8
tig00001299	1108504	C	T	0 9	0 9	0 1	0 4	0 3	0 4	0 2	0 4	0 7	0 11	0 10	0 11	0 2	0 12	0 1	0 6	0 7	0 3	0 11	0 10	0 4	0 6	0 4	0 11	0 1	0 3	0 6	0 10	0 5	0 2	0 1	0 0	0 23	0 22	0 9	0 7	0 14	0 36	0 17	0 10	0 21	0 29	0 33	0 15	0 11	0 14
tig00001299	1108509	C	T	0 0	0 0	0 0	0 0	0 0	0 0	0 0	0 0	0 0	0 0	0 0	0 0	0 0	0 0	0 0	0 0	0 0	0 0	0 0	0 0	0 0	0 0	0 0	0 0	0 0	0 0	0 0	0 0	0 0	0 0	0 0	0 0	0 0	0 0	0 0	0 0	0 0	0 0	0 0	0 0	0 0	0 0	0 0	0 0	0 0	0 0
tig00001299	1108510	AGT	A	0 0	0 0	0 0	0 0	0 0	0 0	0 0	0 0	0 0	0 0	0 0	0 0	0 0	0 0	0 0	0 0	0 0	0 0	0 0	0 0	0 0	0 0	0 0	0 0	0 0	0 0	0 0	0 0	0 0	0 0	0 0	0 0	0 0	0 0	0 0	0 0	0 0	0 0	0 0	0 0	0 0	0 0	0 0	0 0	0 0	0 0
tig00001299	1108511	GT	AC	4 0	4 0	0 0	0 0	3 0	2 0	0 0	3 0	0 0	5 0	6 0	5 0	1 0	3 0	0 0	1 0	5 0	1 0	5 0	3 0	3 0	2 0	3 0	3 0	0 0	1 0	1 0	6 0	2 0	0 0	0 0	0 0	1 0	9 0	2 0	2 0	0 0	4 0	1 0	3 0	1 0	3 0	9 0	4 0	4 0	2 0
tig00001299	1108512	T	C	3 0	3 0	1 0	3 0	0 0	1 0	2 0	0 0	4 0	5 0	3 0	3 0	1 0	6 0	0 0	3 0	1 0	2 0	3 0	4 0	1 0	3 0	2 0	4 0	0 0	0 0	4 0	1 0	2 0	2 0	0 0	0 0	20 0	12 0	2 0	1 0	10 0	27 0	15 0	7 0	4 0	13 0	20 0	10 0	6 0	12 0
tig00001299	1108512	TGCC	CGCA	0 0	0 0	0 0	0 0	0 0	0 0	0 0	0 0	0 0	0 0	0 0	0 0	0 0	0 0	0 0	0 0	0 0	0 0	0 0	0 0	0 0	0 0	0 0	0 0	0 0	0 0	0 0	0 0	0 0	0 0	0 0	0 0	0 0	0 0	0 0	1 0	0 0	0 0	0 0	0 0	0 0	0 0	0 0	0 0	0 0	0 0
tig00001299	1108512	TGC	CGT	0 0	0 0	0 0	0 0	0 0	0 0	0 0	0 0	0 0	0 0	0 0	0 0	0 0	0 0	0 0	0 0	0 0	0 0	0 0	0 0	0 0	0 0	0 0	0 0	0 0	0 0	0 0	0 0	0 0	0 0	0 0	0 0	0 0	0 0	0 0	0 0	0 0	0 0	0 0	0 0	13 0	10 0	0 0	0 0	0 0	0 0
tig00001299	1108520	G	A	0 10	0 9	0 1	0 4	0 3	0 4	0 2	0 4	0 6	0 11	0 10	0 10	0 2	0 12	0 1	0 4	0 7	0 3	0 11	0 9	0 4	2 4	0 4	0 9	0 1	0 3	0 5	0 10	0 9	0 1	0 1	0 0	1 24	8 12	4 2	1 3	1 10	2 27	1 15	2 6	3 16	5 24	10 21	3 10	4 7	2 12
tig00001299	1108523	G	T	0 12	0 9	0 1	0 4	0 3	0 4	0 2	0 6	0 8	0 11	0 10	0 9	0 2	0 12	0 1	0 4	0 7	0 3	0 11	0 9	0 4	0 5	0 4	0 9	0 1	0 3	0 5	0 10	0 9	0 3	0 1	0 0	21 1	14 7	1 4	2 3	3 7	0 33	11 1	6 3	0 22	13 13	6 24	8 5	7 4	13 2
tig00001299	1108528	G	A	0 13	0 9	0 1	0 4	0 3	0 4	0 2	0 5	0 7	0 10	0 10	0 8	0 2	0 12	0 1	0 4	0 7	0 3	0 11	0 9	0 4	0 5	0 4	0 9	0 1	0 3	0 4	0 10	0 10	0 3	0 1	0 0	0 22	0 20	0 5	0 4	0 11	0 30	0 14	0 9	0 21	0 29	0 32	0 13	0 11	0 17
tig00001299	1108533	T	C	6 0	4 0	1 0	2 0	3 0	1 0	2 0	3 0	3 0	10 0	7 0	3 0	2 0	4 0	0 0	3 0	6 0	3 0	7 0	5 0	3 0	5 0	2 0	7 0	0 0	1 0	3 0	7 0	2 6	2 0	0 0	0 0	1 16	8 12	2 1	2 3	0 9	4 26	1 12	3 3	3 15	4 19	9 21	3 10	4 7	2 12
tig00001299	1108537	C	T	0 13	0 6	0 1	0 5	0 3	0 3	0 2	0 5	0 6	0 10	0 7	0 7	0 2	0 7	0 1	0 3	0 6	0 3	0 10	0 7	0 3	0 5	0 2	0 8	0 1	0 3	0 4	0 9	0 9	0 4	0 1	0 0	0 17	0 18	0 4	0 5	0 13	0 30	0 13	0 6	0 19	0 21	0 30	0 11	0 11	0 15
tig00001299	1108539	T	C	1 11	3 3	0 1	1 4	3 0	2 1	0 2	1 4	0 6	5 5	6 1	1 6	1 1	2 5	1 0	1 3	5 1	1 1	5 5	5 2	2 1	2 3	1 1	3 5	1 0	3 0	1 2	2 7	3 6	4 0	1 0	0 0	1 15	8 10	2 1	2 3	1 9	4 22	1 12	3 2	3 15	5 19	10 17	3 7	1 5	2 13
tig00001299	1108543	G	A	0 12	0 6	0 1	0 5	0 3	0 3	0 2	0 5	0 5	0 10	0 7	0 7	0 2	0 7	0 1	0 4	0 6	0 2	0 10	0 7	0 3	0 5	0 2	0 8	0 1	0 3	0 2	0 9	0 9	0 3	0 1	0 0	0 12	0 19	0 3	0 5	0 14	0 30	0 14	0 5	0 19	0 25	0 24	0 12	0 7	0 14
tig00001299	1108545	TGCAG	GGCAA	0 10	0 3	0 1	0 4	0 0	0 1	0 2	0 4	0 5	0 4	0 0	0 5	0 1	0 3	0 0	0 1	0 1	0 1	0 5	0 2	0 1	0 4	0 1	0 4	0 0	0 0	0 1	0 7	0 6	0 3	0 0	0 0	0 11	6 12	2 1	0 3	1 11	0 27	0 13	3 4	2 15	3 17	7 17	2 9	1 6	2 12
tig00001299	1108547	C	T	1 10	2 3	0 1	0 4	3 0	1 1	0 2	1 4	0 5	5 4	5 0	1 5	1 1	1 3	0 0	1 1	5 1	1 1	4 5	3 2	1 1	1 4	1 1	3 4	0 0	1 0	1 1	2 7	2 6	0 3	0 0	0 0	0 11	0 12	0 1	0 3	0 11	0 27	0 13	0 4	0 15	0 17	0 17	0 9	0 6	0 12
tig00001299	1108549	G	A	0 10	0 3	0 1	0 4	0 0	0 1	0 2	0 4	0 5	0 4	0 0	0 5	0 1	0 3	0 0	0 1	0 1	0 1	0 5	0 2	0 1	0 4	0 1	0 4	0 0	0 0	0 1	0 7	0 6	0 3	0 0	0 0	0 11	1 12	0 1	0 3	0 11	3 27	0 13	0 4	0 15	0 17	0 17	0 9	0 6	0 12
tig00001299	1108556	T	C	4 0	2 0	0 0	0 0	3 0	1 0	0 0	2 0	0 0	5 0	5 0	2 0	1 0	1 0	0 0	1 0	5 0	1 0	4 0	2 0	1 0	2 0	1 0	3 0	0 0	1 0	1 0	6 0	8 0	0 0	0 0	0 0	8 0	10 6	1 2	4 0	3 8	0 27	12 0	3 3	8 9	16 4	3 18	6 3	4 1	11 2
tig00001299	1108556	TG	CA	0 0	0 0	0 0	1 0	0 0	1 0	2 0	1 0	1 0	3 0	0 0	1 0	0 0	0 0	0 0	1 0	0 0	1 0	0 0	0 0	1 0	1 0	1 0	1 0	0 0	0 0	0 0	1 0	0 0	0 0	0 0	0 0	0 0	0 6	0 2	0 0	0 8	0 27	0 0	0 3	0 9	0 4	0 18	0 3	0 1	0 2
tig00001299	1108563	T	C	0 11	0 2	0 0	0 3	0 3	0 2	0 2	0 5	0 3	0 8	0 4	0 3	0 0	0 2	0 1	0 2	0 5	0 2	0 6	0 3	0 2	0 3	0 1	0 3	0 1	0 3	0 2	0 9	0 9	4 1	0 0	0 0	0 8	0 13	0 3	0 6	0 14	0 25	0 10	0 7	0 16	0 20	0 22	0 6	0 2	0 14
tig00001299	1108565	GC	AT	0 9	0 2	0 0	0 2	0 2	0 1	0 0	0 6	0 3	0 4	0 4	0 3	0 0	0 1	0 1	0 1	0 0	0 2	0 5	0 1	0 1	0 1	0 1	0 2	0 0	0 3	0 2	0 7	0 8	0 5	0 0	0 0	0 8	0 16	0 3	0 6	0 5	27 1	0 7	0 6	6 8	0 19	0 11	0 7	0 5	0 12
tig00001299	1108566	C	T	0 9	0 2	0 0	0 2	0 2	0 1	0 0	0 6	0 3	0 4	0 4	0 3	0 0	0 1	0 1	0 1	0 0	0 2	0 5	0 1	0 1	0 1	0 1	0 2	0 0	0 3	0 2	0 7	0 8	0 5	0 0	0 0	0 8	0 16	0 3	0 6	8 5	0 1	0 7	0 6	0 8	0 19	8 11	1 7	0 5	0 12
tig00001299	1108566	CGC	TGT	0 9	0 2	0 0	0 2	0 2	0 1	0 0	0 6	0 3	0 4	0 4	0 3	0 0	0 1	0 1	0 1	0 0	0 2	0 5	0 1	0 1	0 1	0 1	0 2	0 0	0 3	0 2	0 7	0 8	0 5	0 0	0 0	0 8	0 16	0 3	0 6	0 5	0 1	0 7	0 6	0 8	0 19	0 11	0 7	0 5	0 12
tig00001299	1108568	C	T	0 9	0 2	0 0	0 2	0 2	0 1	0 0	0 6	0 3	0 4	0 4	0 3	0 0	0 1	0 1	0 1	0 0	0 2	0 5	0 1	0 1	0 1	0 1	0 2	0 0	0 3	0 2	0 7	0 8	0 5	0 0	0 0	0 8	0 16	0 3	0 6	0 5	0 1	0 7	0 6	2 8	1 19	0 11	0 7	0 5	0 12
tig00001299	1108571	GGGT	AGGC	1 7	1 0	0 0	0 2	0 0	0 0	0 0	1 3	0 2	0 0	1 0	0 0	0 0	0 0	0 0	1 0	0 0	1 0	0 0	0 0	1 0	0 0	0 0	0 0	0 0	1 0	0 0	0 1	0 5	0 0	0 0	0 0	0 8	0 9	0 2	0 3	0 12	0 26	0 6	0 3	0 13	0 15	0 17	0 5	0 4	0 10
tig00001299	1108572	GGT	AAC	0 7	0 0	0 0	0 2	0 0	0 0	0 0	0 3	0 2	0 0	0 0	0 0	0 0	0 0	0 0	0 0	0 0	0 0	0 0	0 0	0 0	0 0	0 0	0 0	0 0	0 0	0 0	0 1	0 5	0 0	0 0	0 0	0 8	0 9	0 2	0 3	0 12	0 26	0 6	0 3	0 13	0 15	0 17	0 5	0 4	0 10
tig00001299	1108573	GT	AC	0 7	0 0	0 0	0 2	0 0	0 0	0 0	0 3	0 2	0 0	0 0	0 0	0 0	0 0	0 0	0 0	0 0	0 0	0 0	0 0	0 0	0 0	0 0	0 0	0 0	0 0	0 0	0 1	0 5	0 0	0 0	0 0	0 8	0 9	0 2	0 3	0 12	0 26	0 6	0 3	0 13	0 15	0 17	0 5	0 4	0 10
tig00001299	1108574	T	C	0 7	0 0	0 0	0 2	0 0	0 0	0 0	0 3	0 2	0 0	0 0	0 0	0 0	0 0	0 0	0 0	0 0	0 0	0 0	0 0	0 0	0 0	0 0	0 0	0 0	0 0	0 0	0 1	0 5	0 0	0 0	0 0	0 8	0 9	0 2	0 3	0 12	0 26	0 6	1 3	2 13	1 15	0 17	0 5	0 4	1 10
tig00001299	1108574	TTG	CTA	0 7	0 0	0 0	0 2	0 0	0 0	0 0	0 3	0 2	0 0	0 0	0 0	0 0	0 0	0 0	0 0	0 0	0 0	0 0	0 0	0 0	0 0	0 0	0 0	0 0	0 0	0 0	0 1	0 5	0 0	0 0	0 0	0 8	0 9	0 2	2 3	0 12	0 26	0 6	0 3	0 13	0 15	0 17	0 5	0 4	0 10
tig00001299	1108583	T	C	0 6	0 0	0 0	0 2	0 0	0 0	0 0	0 3	0 2	0 0	0 0	0 0	0 0	0 0	0 0	0 0	0 0	0 0	0 0	0 0	0 0	0 0	0 0	0 1	0 0	0 0	0 0	0 1	5 0	2 0	0 0	0 0	7 0	14 0	2 0	6 0	10 0	24 0	5 0	3 0	14 0	13 1	18 1	5 1	3 0	12 0
tig00001299	1108591	G	A	0 6	0 0	0 0	0 2	0 0	0 0	0 0	0 3	0 2	0 0	0 0	0 0	0 0	0 0	0 0	0 0	0 0	0 0	0 0	0 0	0 0	0 0	0 0	0 1	0 0	0 0	0 0	0 1	0 5	0 3	0 0	0 0	0 5	2 10	1 2	2 4	2 8	1 20	0 5	2 3	2 11	2 12	4 14	1 4	0 3	1 11
tig00001299	1108593	A	T	0 5	0 0	0 0	0 2	0 0	0 0	0 0	0 3	0 2	0 0	0 0	0 0	0 0	0 0	0 0	0 0	0 0	0 0	0 0	0 0	0 0	0 0	0 0	0 1	0 0	0 0	0 0	0 1	0 5	0 3	0 0	0 0	0 5	0 12	0 3	0 6	0 12	0 20	0 5	0 5	0 13	0 14	0 16	0 5	0 3	0 12
tig00001299	1108606	G	A	0 5	0 0	0 0	0 2	0 0	0 0	0 0	0 3	0 2	0 0	0 0	0 0	0 0	0 0	0 0	0 0	0 0	0 0	0 0	0 0	0 0	0 0	0 0	0 1	0 0	0 0	0 0	0 1	0 5	0 3	0 0	0 0	0 5	0 9	0 1	0 5	2 6	0 17	0 5	0 4	0 14	0 12	0 13	0 3	0 3	1 8
tig00001299	1108607	GTAT	ATAC	0 0	0 0	0 0	0 0	0 0	0 0	0 0	0 0	0 0	0 0	0 0	0 0	0 0	0 0	0 0	0 0	0 0	0 0	0 0	0 0	0 0	0 0	0 0	0 1	0 0	0 0	0 0	0 0	0 3	0 3	0 0	0 0	0 6	0 7	0 1	0 4	0 8	0 15	0 5	0 4	0 9	0 11	0 14	0 4	0 3	0 8
tig00001299	1108609	A	G	0 0	0 0	0 0	0 0	0 0	0 0	0 0	0 0	0 0	0 0	0 0	0 0	0 0	0 0	0 0	0 0	0 0	0 0	0 0	0 0	0 0	0 0	0 0	0 1	0 0	0 0	0 0	0 0	0 3	0 3	0 0	0 0	0 6	0 7	0 1	0 4	0 8	0 15	0 5	0 4	0 9	0 11	0 14	0 4	0 3	0 8
tig00001299	1108617	T	A	0 4	0 0	0 0	0 2	0 0	0 0	0 0	0 3	0 2	0 0	0 0	0 0	0 0	0 0	0 0	0 0	0 0	0 0	0 0	0 0	0 0	0 0	0 0	0 0	0 0	0 0	0 0	0 1	0 2	0 3	0 0	0 0	0 5	0 7	0 1	0 2	0 9	0 14	0 3	0 4	0 9	0 11	0 9	0 4	0 4	0 8
tig00001299	1108623	G	T	1 0	0 0	0 0	1 0	0 0	0 0	0 0	0 0	0 0	0 0	0 0	0 0	0 0	0 0	0 0	0 0	0 0	0 0	0 0	0 0	0 0	0 0	0 0	0 0	0 0	0 0	0 0	0 0	0 0	2 0	0 0	0 0	0 0	1 0	0 0	0 0	0 0	0 0	0 0	0 0	0 0	0 0	0 0	0 0	0 0	0 0
tig00001299	1108623	GC	TT	0 0	0 0	0 0	0 0	0 0	0 0	0 0	0 0	0 0	0 0	0 0	0 0	0 0	0 0	0 0	0 0	0 0	0 0	0 0	0 0	0 0	0 0	0 0	0 0	0 0	0 0	0 0	0 0	0 0	0 0	0 0	0 0	6 0	5 0	0 0	1 0	6 0	12 0	2 0	3 0	6 0	11 0	7 0	4 0	4 0	8 0
tig00001299	1108633	C	T	0 1	0 0	0 1	0 1	0 0	0 0	0 1	0 1	0 1	0 0	0 1	0 1	0 1	0 0	0 0	0 0	0 0	0 0	0 1	0 0	0 0	0 0	0 0	0 0	0 0	0 0	0 1	0 0	0 1	0 2	0 0	0 0	6 0	4 1	0 0	1 0	6 0	14 0	2 0	2 0	6 0	12 0	7 0	4 0	4 0	8 0
tig00001299	1108640	TTC	T	0 0	0 0	0 0	0 0	0 0	0 0	0 0	0 1	0 1	0 0	0 0	0 0	0 0	0 0	0 0	0 0	0 0	0 0	0 0	0 0	0 0	0 0	0 0	0 0	0 0	0 0	0 0	0 0	0 0	0 0	0 0	0 0	5 0	4 1	0 0	1 0	5 0	10 0	2 0	2 0	4 0	12 1	4 0	3 0	3 0	6 0
tig00001299	1108655	A	G	0 0	0 1	0 1	0 0	0 0	0 0	0 1	0 2	0 2	0 1	0 1	0 2	0 1	0 0	0 0	0 1	0 0	0 0	0 1	0 0	0 0	0 0	0 0	0 0	0 0	0 0	0 1	0 0	0 1	0 1	0 0	0 0	0 4	0 4	0 0	0 1	0 6	0 12	0 2	0 2	0 5	0 17	0 5	0 3	0 4	0 6
tig00001299	1108685	T	C	0 1	0 2	0 1	0 0	0 0	0 2	0 2	0 2	0 2	0 1	0 1	0 2	0 1	0 0	0 0	0 1	0 1	0 1	0 1	0 0	0 1	0 1	0 0	0 0	0 0	0 0	0 1	0 0	0 1	0 1	0 0	0 0	0 1	0 4	0 0	0 1	0 5	0 7	0 1	0 1	0 2	0 14	0 4	0 3	0 3	0 3
tig00001299	1108705	AT	A	0 0	0 1	0 1	0 0	0 0	0 1	0 2	0 1	0 2	0 1	0 1	0 2	0 1	0 0	0 0	0 1	0 1	0 1	0 1	0 0	0 1	0 0	0 0	0 0	0 0	0 0	0 1	0 0	0 1	0 2	0 0	0 0	0 1	0 1	0 0	0 0	0 2	0 4	0 1	0 0	1 0	2 6	0 1	0 3	0 1	0 2
tig00001299	1108705	A	AT	0 0	0 1	0 1	0 0	0 0	0 1	0 2	0 1	0 2	0 1	0 1	0 2	0 1	0 0	0 0	0 1	0 1	0 1	0 1	0 0	0 1	0 0	0 0	0 0	0 0	0 0	0 1	0 0	0 1	0 2	0 0	0 0	0 1	0 1	0 0	0 0	0 2	0 4	0 1	0 0	0 0	0 6	0 1	0 3	0 1	0 2
tig00001299	1108737	AT	A	0 1	0 1	0 0	0 0	0 0	0 1	0 1	0 1	0 0	0 0	0 0	0 0	0 0	0 0	0 0	0 0	0 1	0 1	0 0	0 0	0 1	0 0	0 0	0 0	0 0	0 0	0 0	0 0	0 0	0 0	0 0	0 0	0 1	0 0	0 0	0 0	0 1	0 0	0 0	0 0	0 0	0 8	0 0	0 0	0 1	0 1
tig00001299	1108742	A	AT	0 1	0 1	0 0	0 0	0 0	0 1	0 1	0 1	0 0	0 0	0 0	0 0	0 0	0 0	0 0	0 0	0 1	0 1	0 0	0 0	0 1	0 0	0 0	0 0	0 0	0 0	0 0	0 0	0 0	0 0	0 0	0 0	0 1	0 0	0 0	0 0	0 1	3 0	0 0	0 0	0 0	1 8	1 0	1 0	0 1	0 1
tig00001299	1108756	T	TA	0 0	0 0	0 0	0 0	0 0	0 1	0 1	0 0	0 0	0 0	0 0	0 0	0 0	0 0	0 0	0 0	0 1	0 0	0 0	0 0	0 0	0 1	0 0	0 0	0 0	0 0	0 0	0 0	0 0	0 1	0 0	0 0	0 0	0 0	0 0	0 0	0 1	0 3	0 0	0 0	0 0	0 8	0 0	0 2	0 0	0 1
tig00001299	1108778	AGTT	GGTA	0 0	0 0	0 0	0 0	0 0	0 0	0 0	0 0	0 0	0 0	0 0	0 0	0 0	0 0	0 0	0 0	0 0	0 0	0 0	0 0	0 0	0 0	0 0	0 0	0 0	0 0	0 0	0 0	0 0	0 0	0 0	0 0	0 0	0 0	0 0	0 0	1 0	3 0	0 0	0 0	0 0	4 0	0 0	1 0	0 0	1 0
tig00001299	1108781	T	C	0 0	0 0	0 0	0 0	0 0	1 0	0 0	0 0	0 0	0 0	0 0	0 0	0 0	0 0	0 0	0 0	0 0	0 0	0 0	0 0	0 0	1 0	0 0	0 0	0 0	0 0	0 0	0 0	0 0	1 0	1 0	0 0	0 0	0 0	0 0	0 0	0 0	0 0	0 0	0 0	0 0	0 0	1 0	0 0	0 0	0 0
tig00001299	1108793	GTTG	ATTA	0 0	0 0	0 0	0 0	0 0	0 0	0 0	0 0	0 0	0 0	0 0	0 0	0 0	0 0	0 0	0 0	0 0	0 0	0 0	0 0	0 0	0 0	0 0	0 0	0 0	0 0	0 0	0 0	0 0	0 0	0 3	0 0	0 0	0 0	0 0	0 0	0 0	2 0	0 0	0 0	0 0	1 0	0 2	0 0	0 0	0 0
tig00001299	1108828	A	T	0 0	0 0	0 0	0 0	0 0	0 0	0 0	0 0	0 0	0 0	0 0	0 0	0 0	0 0	0 0	0 0	0 0	0 0	0 0	0 0	0 0	0 0	0 0	0 0	0 0	0 0	0 0	0 0	0 0	0 0	4 0	0 0	0 0	0 0	0 0	0 0	0 0	0 0	0 0	0 0	0 0	0 0	0 0	0 0	0 0	0 0
tig00001299	1108832	AT	A	0 0	0 0	0 0	0 0	0 0	0 0	0 0	0 0	0 0	0 0	0 0	0 0	0 0	0 0	0 0	0 0	0 0	0 0	0 0	0 0	0 0	0 0	0 0	0 0	0 0	0 0	0 0	0 0	0 0	0 0	0 4	0 0	0 0	0 0	0 0	0 0	0 0	0 0	0 0	0 0	0 0	0 0	0 0	0 0	0 0	0 0
tig00001299	1108885	T	G	0 0	0 0	0 0	0 0	0 0	0 0	0 0	0 0	0 0	0 0	0 0	0 0	0 0	0 0	0 0	0 0	0 0	0 0	0 0	0 0	0 0	0 0	0 0	0 0	0 0	0 0	0 0	0 0	0 0	1 0	0 2	0 1	0 0	0 0	0 0	0 0	1 0	0 0	0 0	0 0	0 0	0 0	2 0	1 0	0 0	1 0
tig00001299	1108917	T	C	0 0	0 0	0 0	0 0	0 0	0 0	0 0	0 0	0 0	0 0	0 0	0 0	0 0	0 0	0 0	0 0	0 0	0 0	0 0	0 0	0 0	0 0	0 0	0 0	0 0	0 0	0 0	0 0	0 0	0 3	0 1	0 1	1 0	0 1	0 0	0 0	2 0	1 0	0 0	0 0	0 0	0 0	1 1	1 0	0 0	1 1
tig00001299	1108925	C	T	0 0	0 0	0 0	0 0	0 0	0 0	0 0	0 0	0 0	0 0	0 0	0 0	0 0	0 0	0 0	0 0	0 0	0 0	0 0	0 0	0 0	0 0	0 0	0 0	0 0	0 0	0 0	0 0	0 0	0 3	0 1	0 1	0 1	0 1	0 0	0 0	0 2	0 1	0 0	0 0	0 0	0 0	0 2	0 1	0 0	0 3
tig00001299	1108939	A	G	0 0	0 0	0 0	0 0	0 0	0 0	0 0	0 0	0 0	0 0	0 0	0 0	0 0	0 0	0 0	0 0	0 0	0 0	0 0	0 0	0 0	0 0	0 0	0 0	0 0	0 0	0 0	0 0	0 0	0 3	0 2	0 1	1 0	0 1	0 0	0 0	4 0	1 0	1 0	0 0	0 0	0 0	1 0	2 0	0 0	2 1
tig00001299	1108946	A	G	0 0	0 0	0 0	0 0	0 0	0 0	0 0	0 0	0 0	0 0	0 0	0 0	0 0	0 0	0 0	0 0	0 0	0 0	0 0	0 0	0 0	0 0	0 0	0 0	0 0	0 0	0 0	0 0	0 0	3 0	2 0	1 0	2 0	1 0	0 0	0 0	3 0	1 0	1 0	0 0	0 0	0 0	1 0	2 0	0 0	3 0
tig00001299	1108987	A	G	0 0	0 0	0 0	0 0	0 0	0 0	0 0	0 0	0 0	0 0	0 0	0 0	0 0	0 0	0 0	0 0	0 0	0 0	0 0	0 0	0 0	0 0	0 0	0 0	0 1	0 0	0 0	0 0	0 0	1 0	0 4	0 1	0 2	0 0	0 0	0 0	0 4	0 3	0 2	0 0	0 0	0 0	0 2	0 2	0 0	0 2
tig00001299	1109002	TCATG	GCATT	0 0	0 0	0 0	0 0	0 0	0 0	0 0	0 0	0 0	0 0	0 0	0 0	0 0	0 0	0 0	0 0	0 0	0 0	0 0	0 0	0 0	0 0	0 0	0 0	0 0	0 0	0 0	0 0	0 0	0 0	0 7	0 2	2 0	0 0	0 0	0 0	2 0	3 0	2 0	0 0	0 0	1 0	1 0	1 0	0 0	2 0
tig00001299	1109006	G	T	0 0	0 0	0 0	0 0	0 0	0 0	0 0	0 0	0 0	0 0	0 0	0 0	0 0	0 0	0 0	0 0	0 0	0 0	0 0	0 0	0 0	0 0	0 0	0 0	0 0	0 0	0 0	0 0	0 0	0 0	0 7	0 2	0 0	0 0	0 0	0 0	0 0	0 0	0 0	0 0	0 0	0 0	0 0	0 0	0 0	0 0
tig00001299	1109016	T	C	0 0	0 0	0 0	0 0	0 0	0 0	0 0	0 0	0 0	0 5	0 0	0 0	0 0	0 1	0 0	0 1	0 0	0 0	0 0	0 0	0 0	0 0	0 2	0 0	0 1	0 1	0 0	0 0	0 1	0 2	0 14	0 2	0 2	0 2	0 1	0 2	0 3	0 3	0 3	0 1	0 0	0 1	0 2	0 1	0 0	0 3
tig00001299	1109020	T	A	0 0	0 0	0 0	0 0	0 0	0 0	0 0	0 0	0 0	0 5	0 0	0 0	0 0	0 1	0 0	0 1	0 0	0 0	0 0	0 0	0 0	0 0	0 2	0 0	1 0	0 1	0 0	0 0	0 1	2 1	7 6	0 2	0 2	0 2	0 1	0 2	0 2	0 3	0 3	0 1	0 0	0 1	0 2	0 1	0 0	0 3
tig00001299	1109024	AACTG	CACTA	0 0	0 0	0 0	0 0	0 0	0 1	0 0	0 0	0 0	0 0	0 1	0 0	0 0	0 2	0 0	0 1	0 0	0 0	0 0	0 0	0 0	0 0	0 0	0 0	0 1	0 0	0 0	0 0	0 1	0 2	6 1	3 0	0 2	0 0	0 0	0 0	0 2	0 3	0 2	0 0	0 0	0 1	0 1	0 1	0 0	0 2
tig00001299	1109028	G	A	0 0	0 0	0 0	0 0	0 0	0 1	0 0	0 0	0 0	0 0	0 1	0 0	0 0	0 2	0 0	0 1	0 0	0 0	0 0	0 0	0 0	0 0	0 0	0 0	0 1	0 0	0 0	0 0	0 1	0 2	0 1	0 0	0 2	0 0	0 0	0 0	1 2	0 3	0 2	0 0	0 0	0 1	0 1	0 1	0 0	0 2
tig00001299	1109029	C	T	0 0	0 0	0 0	0 0	0 0	0 1	0 0	0 0	0 0	0 5	1 0	0 0	0 0	0 2	0 0	0 1	0 0	0 0	0 0	0 0	0 0	0 0	0 2	0 0	0 1	0 1	0 0	0 0	0 1	0 2	0 13	0 3	2 0	0 1	0 1	0 2	2 1	3 0	1 1	0 1	0 0	1 0	2 1	1 0	0 0	2 1
tig00001299	1109035	C	T	0 0	0 0	0 0	0 0	0 0	0 1	0 0	0 0	0 0	0 5	0 1	0 0	0 0	0 2	0 0	0 1	0 0	0 0	0 0	0 1	0 0	0 0	0 2	0 0	0 1	0 1	0 0	0 0	0 1	0 2	0 13	0 3	2 0	0 1	0 1	0 2	2 1	4 0	2 1	0 1	0 0	1 0	2 1	1 0	0 0	3 1
tig00001299	1109038	TG	T	0 0	0 0	0 0	0 0	0 0	0 0	0 0	0 0	0 0	0 5	0 1	0 0	0 0	0 1	0 0	0 1	0 0	0 0	0 0	0 1	0 0	0 0	0 2	0 0	0 1	0 1	0 0	0 0	0 1	0 2	0 6	0 3	0 2	0 2	0 1	0 2	0 2	0 4	0 3	0 1	0 0	0 1	0 3	0 1	0 0	0 3
tig00001299	1109039	G	A	0 0	0 0	0 0	0 0	0 0	0 0	0 0	0 0	0 0	0 5	0 1	0 0	0 0	0 1	0 0	0 1	0 0	0 0	0 0	0 1	0 0	0 0	0 2	0 0	0 1	0 1	0 0	0 0	0 1	0 2	0 6	0 3	0 2	0 2	0 1	0 2	0 2	0 4	0 3	0 1	0 0	0 1	0 3	0 1	0 0	0 3
tig00001299	1109048	A	C	0 0	0 0	0 0	0 0	0 0	0 0	0 0	0 0	0 0	0 0	0 0	0 0	0 0	0 0	0 0	0 0	0 0	0 0	0 0	0 0	0 0	0 0	0 0	0 0	0 0	0 0	0 0	0 0	0 0	0 0	0 0	0 0	1 0	0 0	0 0	0 0	2 0	3 0	2 0	0 0	0 0	0 0	1 0	1 0	0 0	2 0
tig00001299	1109048	AACGTTGGG	CACGTTGGA	0 0	0 0	0 0	0 0	0 0	0 0	0 0	0 0	0 0	0 0	0 0	0 0	0 0	0 0	0 0	0 0	0 0	0 0	0 0	0 0	0 0	0 0	0 0	0 0	0 0	0 0	0 0	0 0	0 0	0 0	6 0	3 0	0 0	0 0	0 0	0 0	0 0	0 0	0 0	0 0	0 0	0 0	0 0	0 0	0 0	0 0
tig00001299	1109063	G	T	0 0	0 0	0 0	0 0	0 0	0 1	0 0	0 0	0 0	0 5	0 1	0 0	0 0	0 2	0 0	0 1	0 0	0 0	0 0	0 1	0 0	0 0	0 2	0 0	0 1	0 1	0 0	0 0	0 1	0 3	0 12	0 3	0 1	0 2	0 1	0 1	0 3	0 3	0 3	0 1	0 0	0 1	0 3	0 1	0 0	0 4
tig00001299	1109064	G	A	0 0	0 0	0 0	0 0	0 0	0 1	0 0	0 0	0 0	0 5	0 1	0 0	0 0	0 2	0 0	0 1	0 0	0 0	0 0	0 1	0 0	0 0	0 2	0 0	0 1	0 1	0 0	0 0	0 1	0 3	0 12	0 2	0 1	0 2	0 1	0 1	1 2	3 0	0 3	0 1	0 0	0 0	0 3	1 0	0 0	0 4
tig00001299	1109066	G	A	0 0	0 0	0 0	0 0	0 0	0 1	0 0	0 0	0 0	0 5	0 1	0 0	0 0	0 2	0 0	0 1	0 0	0 0	0 0	0 1	0 0	0 0	0 2	0 0	0 1	0 1	0 0	0 0	0 1	0 3	0 12	0 3	0 1	0 1	0 1	0 1	0 3	0 3	0 3	0 1	0 0	0 1	0 3	0 1	0 0	0 4
tig00001299	1109072	G	A	0 0	0 0	0 0	0 0	0 0	0 1	0 0	0 0	0 0	0 5	0 1	0 0	0 0	1 1	0 0	1 0	0 0	0 0	0 0	0 1	0 0	0 0	0 2	0 0	0 0	0 1	0 0	0 0	1 0	2 1	0 10	0 2	0 1	0 0	0 0	0 0	0 3	0 3	0 2	0 0	0 0	0 0	0 2	0 1	0 0	0 3
tig00001299	1109076	CCTCTTGAG	A	0 0	0 0	0 0	0 0	0 0	0 0	0 0	0 0	0 0	0 0	0 0	0 0	0 0	0 0	0 0	0 0	0 0	0 0	0 0	0 0	0 0	0 0	0 0	0 0	0 0	0 0	0 0	0 0	0 0	0 0	0 0	0 0	0 0	0 0	0 0	0 0	0 0	0 0	0 0	0 0	0 0	0 0	0 0	0 0	0 0	0 0
tig00001299	1109083	AG	A	0 0	0 0	0 0	0 0	0 0	0 0	0 0	0 0	0 0	0 0	0 0	0 0	0 0	0 0	0 0	0 0	0 0	0 0	0 0	0 0	0 0	0 0	0 0	0 0	0 0	0 0	0 0	0 0	0 0	0 0	0 0	0 0	0 0	0 0	0 0	0 0	0 0	0 0	0 0	0 0	0 0	0 0	0 0	0 0	0 0	0 0
tig00001299	1109100	T	A	0 0	0 0	0 0	0 0	0 0	0 0	0 0	0 0	0 0	0 0	0 0	0 0	0 0	0 0	0 0	0 0	0 0	0 0	0 0	0 0	0 0	0 0	0 0	0 0	0 0	0 0	0 0	0 0	0 0	0 0	0 0	0 0	0 0	0 0	0 0	0 0	0 0	0 0	0 0	0 0	0 0	0 0	0 2	0 0	0 0	0 0
tig00001299	1109100	T	C	0 0	0 0	0 0	0 0	0 0	0 0	0 0	0 0	0 0	0 0	0 0	0 0	0 0	0 0	0 0	0 0	0 0	0 0	0 0	0 0	0 0	0 0	0 0	0 0	0 0	0 0	0 0	0 0	0 0	0 0	0 0	2 0	0 0	0 0	0 0	0 0	0 0	1 0	1 0	0 0	0 0	0 0	0 2	0 0	0 0	0 0
tig00001299	1109105	C	T	0 0	0 0	0 0	0 0	0 0	0 0	0 0	0 0	0 0	0 0	0 0	0 0	0 0	0 0	0 0	0 0	0 0	0 0	0 0	0 0	0 0	0 0	0 0	0 0	0 0	0 0	0 0	0 0	0 0	0 0	0 0	0 2	0 0	0 0	0 0	0 0	0 0	0 0	0 1	0 0	0 0	0 0	0 2	0 0	0 0	0 0
tig00001299	1109106	A	G	0 0	0 0	0 0	0 0	0 0	0 0	0 0	0 0	0 0	0 0	0 0	0 0	0 0	0 0	0 0	0 0	0 0	0 0	0 0	0 0	0 0	0 0	0 0	0 0	0 0	0 0	0 0	0 0	0 0	0 0	0 0	0 2	0 0	0 0	0 0	0 0	0 0	0 0	1 0	0 0	0 0	0 0	0 2	0 0	0 0	0 0
tig00001299	1109116	A	G	0 0	0 0	0 0	0 0	0 0	0 0	0 0	0 0	0 0	0 0	0 0	0 0	0 0	0 0	0 0	0 0	0 0	0 0	0 0	0 0	0 0	0 0	0 0	0 0	0 0	0 0	0 0	0 0	0 0	0 0	0 0	2 0	0 0	0 0	0 0	0 1	0 0	0 0	1 0	0 0	0 0	0 0	0 0	0 0	0 0	0 0
tig00001299	1109124	C	T	0 0	0 0	0 0	0 0	0 0	0 0	0 0	0 0	0 0	0 0	0 0	0 0	0 0	0 0	0 0	0 0	0 0	0 0	0 0	0 0	0 0	0 0	0 0	0 0	0 0	0 0	0 0	0 0	0 0	0 0	0 1	0 2	0 0	0 0	0 0	0 1	0 0	0 0	0 0	0 0	0 0	0 0	0 0	0 0	0 0	0 0
tig00001299	1109131	G	A	0 0	0 0	0 0	0 0	0 0	0 0	0 0	0 0	0 0	0 0	0 0	0 0	0 0	0 0	0 0	0 0	0 0	0 0	0 0	0 0	0 0	0 0	0 0	0 0	0 0	0 0	0 0	0 0	0 0	0 0	0 1	0 2	0 0	0 0	0 0	0 1	0 0	0 0	0 0	0 0	0 0	0 0	0 0	0 0	0 0	0 0
tig00001299	1109136	GGT	AGTC	0 0	0 0	0 0	0 0	0 0	0 0	0 0	0 0	0 0	0 0	0 0	0 0	0 0	0 0	0 0	0 0	0 0	0 0	0 0	0 0	0 0	0 0	0 0	0 0	0 0	0 0	0 0	0 0	0 0	0 0	0 0	0 0	0 0	0 0	0 0	0 0	0 0	0 0	0 0	0 0	0 0	0 0	0 0	0 0	0 0	0 0
tig00001299	1109144	A	G	0 0	0 0	0 0	0 0	0 0	0 0	0 0	0 0	0 0	0 0	0 0	1 0	0 0	0 0	0 0	0 0	0 0	0 0	0 0	0 0	0 0	0 0	0 0	0 0	0 0	0 0	0 0	0 0	0 0	0 0	0 2	0 3	0 0	0 0	0 0	0 0	0 0	0 0	0 0	0 0	0 0	0 0	0 0	0 0	0 0	0 0
tig00001299	1109165	G	A	0 4	0 2	0 0	0 4	0 0	0 2	0 0	0 3	0 2	0 6	0 0	0 2	0 2	0 0	0 1	0 2	0 1	0 6	0 2	0 0	0 3	0 5	1 2	0 3	0 1	0 1	0 1	1 6	0 0	0 0	0 5	0 5	0 1	0 3	1 3	0 1	0 5	0 1	1 3	0 3	0 2	5 11	2 7	2 3	1 2	1 4
tig00001299	1109169	C	T	0 4	0 2	0 0	0 4	0 0	0 2	0 0	0 3	0 2	0 9	0 0	0 3	0 2	0 0	0 1	0 2	0 1	0 6	0 2	0 0	0 3	0 5	0 4	0 3	0 1	0 4	0 1	0 7	0 0	0 0	0 5	0 5	0 1	0 3	0 4	0 1	0 4	0 1	0 3	0 3	0 1	0 17	0 9	0 6	0 3	0 6
tig00001299	1109175	G	T	0 4	0 3	0 1	0 5	0 0	0 3	0 0	0 3	0 2	0 9	0 0	0 3	0 3	0 1	0 1	0 2	0 1	0 6	0 2	0 0	0 4	0 7	0 4	0 3	0 2	0 4	0 2	0 8	0 0	0 0	2 0	4 1	0 1	0 3	0 5	0 1	0 5	0 1	0 4	0 4	0 0	0 18	0 8	0 7	0 4	0 6
tig00001299	1109178	ATGGC	CTGGG	0 3	0 1	0 0	0 4	0 0	0 2	0 0	0 1	0 3	0 7	0 0	0 1	0 1	0 0	0 0	0 2	0 1	0 2	0 2	0 0	0 2	0 5	0 2	0 2	0 0	0 3	0 3	0 3	0 0	0 0	0 5	0 4	0 1	0 3	2 3	0 0	0 6	0 2	1 3	0 4	0 1	6 12	2 6	1 2	2 2	1 5
tig00001299	1109180	G	A	1 3	2 1	1 0	1 4	0 0	1 2	0 0	2 1	0 3	2 7	0 0	2 1	1 1	1 0	1 0	0 2	0 1	2 2	1 2	0 0	2 2	0 5	2 2	1 2	2 0	1 3	0 3	4 3	0 0	0 0	0 5	0 4	0 1	0 3	0 3	0 0	0 6	0 2	0 3	0 4	0 1	0 12	0 6	0 2	0 2	0 5
tig00001299	1109189	C	T	0 6	0 4	0 1	0 5	0 1	0 3	0 0	0 3	0 3	0 11	0 0	0 3	0 4	0 1	0 1	0 5	0 2	0 6	0 2	0 0	0 4	0 7	0 4	0 3	0 2	0 4	0 4	0 10	0 1	0 0	0 4	0 4	0 1	0 3	0 5	0 3	0 5	0 2	0 4	0 4	0 4	0 20	0 11	0 8	0 8	0 7
tig00001299	1109197	G	A	0 6	0 4	0 1	0 4	0 1	0 3	0 0	0 3	0 4	0 14	0 0	0 3	0 5	0 1	0 1	0 7	0 2	0 6	0 2	0 0	0 3	0 9	0 5	0 3	0 2	0 5	0 4	0 12	0 1	0 0	0 6	0 6	0 1	0 4	0 5	0 2	1 4	0 3	0 4	0 7	0 3	0 20	0 11	0 9	0 7	0 7
tig00001299	1109198	G	A	0 6	0 4	0 1	0 5	0 1	0 3	0 0	0 3	0 4	0 15	0 1	0 3	0 5	0 2	0 1	0 7	0 2	0 6	0 2	0 0	0 4	0 9	0 5	0 3	0 2	0 5	0 5	0 12	0 1	0 0	0 5	0 6	0 1	0 4	0 5	0 3	0 6	0 6	0 5	0 8	0 3	0 20	0 9	0 10	0 8	0 7
tig00001299	1109201	C	A	1 3	1 3	0 1	1 1	1 0	1 1	0 0	1 2	1 0	4 4	0 0	0 2	2 3	0 1	0 1	5 2	1 0	1 3	0 1	0 0	0 2	6 0	0 3	2 1	0 2	2 1	3 0	1 9	0 1	0 0	0 3	0 5	0 0	0 1	0 2	0 1	0 2	0 6	0 1	0 0	0 2	0 13	0 3	0 6	0 3	0 4
tig00001299	1109203	G	A	0 3	0 3	0 1	0 1	0 0	0 1	0 0	0 2	0 0	0 4	0 0	0 2	0 3	0 1	0 1	0 2	0 0	0 3	0 1	0 0	0 2	0 0	0 3	0 1	0 2	0 1	0 0	0 9	0 1	0 0	0 3	0 5	0 0	2 1	0 2	1 1	2 2	0 6	2 1	5 0	0 2	0 13	3 3	3 6	5 3	2 4
tig00001299	1109210	C	T	0 5	0 4	0 2	0 6	0 1	0 4	0 0	0 4	0 3	0 15	0 1	0 4	0 6	0 5	0 1	0 8	0 4	0 6	0 3	0 0	0 2	0 9	0 5	0 3	0 3	0 4	0 4	0 12	0 1	0 0	0 6	0 6	0 2	0 3	0 1	0 3	0 13	0 17	0 4	0 5	0 2	0 16	0 14	0 10	0 9	0 6
tig00001299	1109213	G	A	0 5	0 4	0 2	0 4	0 1	0 3	0 0	0 5	0 1	0 14	0 1	0 3	0 6	0 5	0 1	0 8	0 4	0 5	0 3	0 0	0 2	0 8	0 5	0 4	0 3	0 4	0 4	0 10	0 0	0 0	0 3	0 5	0 0	0 0	0 1	0 0	0 0	0 0	0 1	0 0	0 0	0 6	0 2	0 2	0 2	0 1
tig00001299	1109215	C	T	0 5	0 4	0 2	0 4	0 1	0 3	0 0	0 5	0 1	0 14	0 1	0 3	0 6	0 5	0 1	0 8	0 4	0 5	0 3	0 0	0 2	0 8	0 5	0 4	0 3	0 4	0 4	0 10	0 0	0 0	0 3	0 5	2 0	1 0	0 1	3 0	2 0	6 0	4 1	6 0	2 0	8 6	6 2	6 2	7 2	5 1
tig00001299	1109224	G	A	0 6	0 4	0 2	0 6	0 1	0 3	0 0	0 5	0 3	0 16	0 1	1 3	0 6	0 5	0 1	0 8	0 4	0 6	0 3	0 0	0 2	0 8	0 5	0 4	0 3	0 4	0 4	0 10	0 1	0 0	0 2	0 6	0 2	0 3	2 0	0 3	0 12	0 16	1 4	0 6	2 0	13 3	2 16	2 7	2 7	1 5
tig00001299	1109229	GGA	AGG	0 0	0 0	0 0	0 0	0 0	0 0	0 0	0 0	0 1	0 2	0 0	0 0	0 0	0 0	0 0	0 0	0 0	0 0	0 0	0 0	0 0	0 0	0 0	0 0	0 0	0 0	0 0	0 2	0 0	0 0	0 0	0 1	0 0	0 1	0 0	0 0	0 9	0 12	0 0	0 0	0 0	0 0	0 8	0 0	0 0	0 0
tig00001299	1109231	A	G	0 0	3 0	0 0	2 0	1 0	2 0	0 0	3 0	1 1	3 2	0 0	0 0	2 0	3 0	1 0	7 0	1 0	1 0	2 0	0 0	1 0	5 0	3 0	3 0	2 0	2 0	3 0	9 2	0 0	0 0	2 0	4 1	2 0	2 1	2 0	4 0	3 9	6 12	5 0	6 0	3 0	13 0	8 8	10 0	9 0	8 0
tig00001299	1109231	ATCC	GTCA	3 0	1 0	1 0	0 0	0 0	0 0	0 0	0 0	0 1	5 2	0 0	2 0	3 0	1 0	0 0	0 0	0 0	2 0	0 0	0 0	1 0	0 0	0 0	0 0	0 0	0 0	0 0	0 2	0 0	0 0	0 0	0 1	0 0	0 1	0 0	0 0	0 9	0 12	0 0	0 0	0 0	0 0	0 8	0 0	0 0	0 0
tig00001299	1109238	C	T	1 4	0 4	0 2	1 4	0 1	0 3	0 0	0 5	1 2	0 10	0 1	0 3	0 5	0 6	0 1	0 7	0 4	0 4	0 3	0 0	0 2	0 8	0 4	0 4	0 3	0 2	0 4	0 11	0 1	0 0	0 2	0 6	0 2	0 5	2 0	0 4	0 12	0 20	1 4	0 6	0 3	3 10	2 15	2 8	2 8	1 8
tig00001299	1109239	C	T	2 3	1 3	1 1	4 1	1 0	2 1	0 0	2 3	2 1	5 7	1 0	0 3	3 3	3 3	0 1	5 3	4 0	3 2	1 2	0 0	0 2	7 1	0 4	2 2	1 2	2 0	4 0	1 10	0 1	0 0	0 2	0 6	0 2	0 5	0 2	0 4	0 12	0 20	0 5	0 6	0 3	0 13	0 17	0 10	0 10	0 9
tig00001299	1109241	CGGGG	TGGGT	0 0	0 0	0 0	0 0	0 0	0 0	0 0	0 0	0 0	0 0	0 0	0 0	0 0	0 0	0 0	0 0	0 0	0 0	0 0	0 0	0 0	0 0	0 0	0 0	0 0	0 0	0 0	0 0	0 0	0 0	0 0	0 0	2 0	5 0	0 0	2 0	3 0	6 0	4 0	6 0	3 0	10 0	6 0	7 0	8 0	8 0
tig00001299	1109242	GGG	AGA	0 0	0 0	0 0	0 0	0 0	0 0	0 0	0 0	0 0	0 0	0 0	0 0	0 0	0 0	0 0	0 0	0 0	0 0	0 0	0 0	0 0	0 0	0 0	0 0	0 0	0 0	0 0	0 0	0 0	0 0	1 0	5 0	0 0	0 0	0 0	0 0	0 0	0 0	0 0	0 0	0 0	0 0	0 0	0 0	0 0	0 0
tig00001299	1109243	GGG	AGC	0 0	0 0	0 0	0 0	0 0	0 0	0 0	2 0	0 0	0 0	0 0	1 0	0 0	0 0	0 0	0 0	0 0	0 0	0 0	0 0	0 0	0 0	0 0	0 0	0 0	0 0	0 0	5 0	0 0	0 0	0 0	0 0	0 0	0 0	2 0	0 0	0 0	0 0	1 0	0 0	0 0	3 0	2 0	2 0	0 0	1 0
tig00001299	1109245	G	A	0 0	0 0	0 0	0 0	0 0	0 0	0 0	0 0	0 0	0 0	0 0	0 0	0 0	0 0	0 0	0 0	0 0	0 0	0 0	0 0	0 0	0 0	0 0	0 0	0 0	0 0	0 0	0 0	0 0	0 0	0 0	0 0	0 0	0 0	0 0	0 0	0 0	0 0	0 0	0 0	0 0	0 0	0 0	0 0	0 0	0 0
tig00001299	1109245	G	C	5 0	3 0	2 0	5 0	1 0	3 0	0 0	1 0	2 0	10 0	1 0	2 0	4 0	6 0	1 0	6 0	4 0	5 0	3 0	0 0	2 0	5 0	3 0	3 0	3 0	1 0	2 0	5 0	0 0	0 0	0 0	0 0	0 0	0 0	0 0	0 0	0 0	0 0	0 0	0 0	0 0	0 0	1 0	1 0	2 0	0 0
tig00001299	1109245	G	T	0 0	0 0	0 0	0 0	0 0	0 0	0 0	0 0	0 0	0 0	0 0	0 0	0 0	0 0	0 0	0 0	0 0	0 0	0 0	0 0	0 0	0 0	0 0	0 0	0 0	0 0	0 0	0 0	1 0	0 0	0 0	0 0	0 0	0 0	0 0	2 0	9 0	15 0	0 0	0 0	0 0	0 0	8 0	0 0	0 0	0 0
tig00001299	1109253	G	A	0 4	0 2	0 2	0 4	0 1	0 3	0 0	0 3	0 2	0 10	0 1	0 3	0 4	0 6	0 0	0 7	0 3	0 3	0 3	0 0	0 1	0 7	0 3	0 3	0 3	0 2	0 4	0 10	0 1	0 0	0 1	0 5	0 2	0 4	0 3	0 4	0 10	0 21	0 7	0 6	0 4	0 14	0 15	0 10	0 10	0 10
tig00001299	1109254	C	T	0 4	0 2	0 2	0 4	0 1	0 3	0 0	0 3	0 2	0 10	0 1	0 3	0 4	0 6	0 0	0 7	0 3	0 3	0 3	0 0	0 1	0 7	0 3	0 3	0 3	0 2	0 4	0 8	0 1	0 0	1 0	5 0	0 2	0 4	0 3	0 4	0 11	0 20	0 6	0 5	0 4	0 14	0 16	0 9	0 10	0 10
tig00001299	1109259	C	T	1 3	1 1	1 1	4 0	1 0	2 1	0 0	1 1	2 0	5 5	1 0	0 3	2 2	3 3	0 0	4 3	3 0	1 1	1 2	0 0	0 1	5 2	0 3	1 1	1 2	2 0	4 0	1 8	1 0	0 0	0 1	0 5	0 5	0 5	0 3	0 4	0 3	0 9	0 6	0 6	0 4	0 14	0 12	0 10	0 10	0 11
tig00001299	1109260	G	A	0 3	0 2	0 2	0 3	0 1	0 3	0 0	0 2	0 2	0 10	0 1	0 3	0 4	0 6	0 0	0 7	0 3	0 2	0 2	0 0	0 1	0 7	0 3	0 2	0 3	0 2	0 4	0 9	0 1	0 0	0 1	0 5	0 5	0 5	0 3	0 4	0 2	0 10	0 7	0 6	0 4	0 13	0 12	0 10	0 10	0 11
tig00001299	1109265	A	G	2 0	1 0	1 0	0 0	1 0	1 0	0 0	0 0	0 0	5 0	0 0	1 0	2 0	4 0	0 0	5 0	1 0	0 0	1 0	0 0	0 0	5 1	1 0	0 0	1 0	1 0	3 0	5 0	0 0	0 0	0 0	5 0	5 0	7 0	2 0	4 0	2 0	8 0	6 2	5 0	1 0	6 0	11 0	10 0	10 0	11 0
tig00001299	1109265	ACTTG	GCTTA	0 0	0 0	0 0	0 0	0 0	0 0	0 0	0 0	0 0	0 0	0 0	0 0	0 0	0 0	0 0	0 0	0 0	0 0	0 0	0 0	0 0	0 1	0 0	0 0	0 0	0 0	0 0	0 0	0 0	0 0	0 0	0 0	0 0	0 0	0 0	0 0	0 0	0 0	0 2	0 0	3 0	8 0	0 0	0 0	0 0	0 0
tig00001299	1109274	A	G	0 3	0 1	0 1	0 2	0 1	0 1	0 0	0 2	0 1	0 8	0 1	0 2	0 2	0 5	0 0	0 5	0 3	0 1	0 2	0 0	0 0	0 4	0 2	0 1	0 1	0 1	0 1	0 4	0 3	0 0	0 1	0 5	0 4	0 7	2 1	0 4	0 2	0 10	1 7	0 6	0 4	3 11	2 9	2 8	2 8	0 11
tig00001299	1109275	C	T	0 3	0 0	0 1	0 2	0 1	0 1	0 0	0 2	0 1	0 8	0 1	0 2	0 2	0 5	0 0	0 4	0 3	0 1	0 1	0 0	0 0	0 4	0 2	0 1	0 1	0 0	0 1	0 4	0 3	0 0	0 1	0 4	0 4	0 7	0 2	0 4	0 2	0 10	0 6	0 6	0 4	0 14	0 10	0 4	0 10	0 11
tig00001299	1109275	CACCA	TACCT	0 3	0 0	0 1	0 2	0 1	0 1	0 0	0 2	0 1	0 8	0 1	0 2	0 2	0 5	0 0	0 4	0 3	0 1	0 1	0 0	0 0	0 4	0 2	0 1	0 1	0 0	0 1	0 4	0 3	0 0	0 1	0 4	0 4	0 7	0 2	0 4	0 2	0 10	0 6	0 6	0 4	0 14	0 10	0 4	0 10	0 11
tig00001299	1109277	C	T	0 3	0 0	0 1	0 2	0 1	0 1	0 0	0 2	0 1	0 8	0 1	0 2	0 2	0 5	0 0	0 4	0 3	0 1	0 1	0 0	0 0	0 4	0 2	0 1	0 1	0 0	0 1	0 4	0 3	0 0	0 1	0 4	0 4	0 7	0 2	0 4	1 2	0 10	0 6	0 6	0 4	0 14	1 10	4 4	0 10	0 11
tig00001299	1109282	CT	TC	0 0	0 0	0 0	0 0	0 0	0 0	0 0	0 0	0 0	0 0	0 0	0 0	0 0	0 0	0 0	0 0	0 0	0 0	0 0	0 0	0 0	0 0	0 0	0 0	0 0	0 0	0 0	0 0	0 3	0 0	0 1	0 5	0 4	0 6	1 1	0 4	0 3	0 10	1 5	0 6	0 4	3 11	2 10	1 8	1 7	0 11
[truncated: 11,618 more rows]
[truncated: 39 more columns]
