# Supplementary material for: Genome Assembly and Sex-Determining Region of Male and Female Populus × sibirica
Source: Front Plant Sci. 2021 Sep 8;12:625416. doi: 10.3389/fpls.2021.625416 (PMC8455832; doi:10.3389/fpls.2021.625416)
Supplement: Supplementary Data 12 — Genetic polymorphisms of P. × sibirica, P. nigra, P. deltoides, P. trichocarpa, P. balsamifera, P. simonii, P. cathayana, P. koreana males based on Illumina WGS data aligned to the male P. × sibirica genome assembly with a further search for polymorphisms in the X SDR haplotype. The numbers located one below the other indicate the number of reads with the reference (bottom) and alternative (top) alleles. [file Data_Sheet_12.XLSX]

## Sheet: SNP table
Supplementary Data 12. Genetic polymorphisms of P. × sibirica, P. nigra, P. deltoides, P. trichocarpa, P. balsamifera, P. simonii, P. cathayana, P. koreana males based on Illumina WGS data aligned to the male P. × sibirica genome assembly with a further search for polymorphisms in the X SDR haplotype.
The numbers located one below the other indicate the number of reads with the reference (bottom) and alternative (top) alleles.
Contig	Nucleotide position	Reference allele	Alternative allele	P.trichocarpa - SRR1821239	P.trichocarpa - SRR1821254	P.trichocarpa - SRR1821247	P.trichocarpa - SRR1821251	P.trichocarpa - SRR1821240	P.trichocarpa - SRR1821241	P.trichocarpa - SRR1821252	P.trichocarpa - SRR1821246	P.trichocarpa - SRR1821248	P.trichocarpa - SRR1821235	P.balsamifera - SRR1821337	P.balsamifera - SRR1821331	P.balsamifera - SRR1821333	P.trichocarpa - SRR1821244	P.balsamifera - SRR1821322	P.trichocarpa - SRR1821237	P.trichocarpa - SRR1821249	P.balsamifera - SRR1821259	P.balsamifera - SRR1821319	P. × sibirica	P.balsamifera - SRR1821325	P.balsamifera - SRR1821345	P.balsamifera - SRR1821336	P.balsamifera - SRR1821346	P.trichocarpa - SRR1821238	P.trichocarpa - SRR1821250	P.balsamifera - SRR1821255	P.balsamifera - SRR1821328	P.balsamifera - SRR1821718	P.balsamifera - SRR1821347	P.cathayana - SRR9007071	P.simonii - SRR9007072	P.koreana - SRR12235434	P.nigra - SRR3045915	P.nigra - SRR3045916	P.nigra - SRR12235433	P.deltoides - SRR11622701	P.deltoides - SRR11622705	P.deltoides - SRR11622726	P.deltoides - SRR11622702	P.deltoides - SRR11622709	P.deltoides - SRR11622692	P.deltoides - SRR11622725	P.deltoides - SRR11622707	P.deltoides - SRR11622687	P.deltoides - SRR11622693
tig00000650	1585221	A	G	0 47	0 42	0 45	0 21	0 68	0 51	0 51	0 34	0 61	0 51	0 21	0 7	0 8	0 48	0 24	0 45	0 48	0 13	0 36	0 9	0 17	0 19	0 20	0 11	0 42	0 34	0 10	0 13	0 13	0 16	0 28	15 14	7 3	0 0	0 1	0 1	0 40	0 23	0 44	0 33	0 29	0 30	0 23	0 40	0 25	0 38
tig00000650	1585223	C	T	0 47	0 44	0 45	0 23	0 68	0 50	0 51	0 36	0 61	0 48	0 20	0 6	0 8	0 49	0 25	0 43	0 48	0 13	0 35	0 8	0 18	0 18	0 22	0 11	0 44	0 34	0 11	0 15	0 12	0 16	18 11	15 15	3 7	0 0	0 1	0 1	0 38	0 23	0 43	0 32	0 28	0 32	0 22	0 38	0 22	0 37
tig00000650	1585236	A	T	0 50	0 44	0 45	0 22	0 72	0 45	0 53	0 46	0 65	0 47	0 26	0 3	0 10	0 54	0 23	0 44	0 48	0 14	0 43	0 9	0 20	0 20	0 19	0 17	0 39	0 32	0 14	0 14	0 14	0 15	0 31	0 26	0 10	0 1	0 3	0 1	0 40	0 24	0 43	0 32	0 30	0 30	0 21	0 37	0 20	0 38
tig00000650	1585245	A	T	0 48	0 44	0 42	0 22	0 69	0 42	0 48	0 46	0 65	0 47	0 21	0 2	0 9	0 52	0 22	0 39	0 50	0 13	0 44	0 8	0 18	0 21	0 24	0 14	0 34	0 36	0 16	0 14	0 13	0 16	0 29	0 27	0 10	0 1	0 3	0 1	0 36	0 28	0 39	0 30	0 28	0 33	0 21	0 33	0 18	0 36
tig00000650	1585253	AAT	CAA	43 0	44 0	41 0	21 0	62 0	43 0	43 0	47 0	58 0	45 0	21 0	2 0	8 0	48 0	23 0	37 0	43 0	10 0	19 24	0 7	16 0	17 0	22 0	14 0	36 0	35 0	17 0	11 0	13 0	15 0	0 32	0 32	0 10	0 1	0 3	0 1	0 33	0 29	0 38	0 33	0 29	0 29	0 23	0 34	0 20	0 45
tig00000650	1585264	C	T	0 44	0 54	0 43	0 22	0 62	0 49	0 42	0 48	0 61	0 49	0 23	0 3	0 10	0 51	0 29	0 38	0 47	0 17	0 44	0 7	0 18	0 14	0 23	0 15	0 40	0 45	0 18	0 14	0 17	0 18	0 32	0 39	0 10	0 2	0 3	0 1	0 34	0 27	0 40	0 31	0 32	0 32	0 20	0 35	0 22	0 47
tig00000650	1585266	GTG	TTA	0 0	0 0	0 0	0 0	0 0	0 0	0 0	0 0	0 0	0 0	0 0	0 0	0 0	0 0	0 0	0 0	0 0	0 0	0 21	0 8	0 0	0 0	0 0	0 0	0 0	0 0	0 0	0 0	0 0	0 0	0 11	0 14	0 7	0 2	0 3	0 1	0 36	0 29	0 42	0 32	0 31	0 32	0 19	0 33	0 25	0 45
tig00000650	1585268	G	A	43 0	52 0	39 0	23 0	62 0	45 0	40 0	47 0	58 0	47 0	23 0	3 0	11 0	49 0	27 0	37 0	47 0	16 0	24 21	0 8	17 0	14 0	25 0	15 0	40 0	46 0	18 0	13 0	17 0	17 0	20 11	23 14	3 7	0 2	0 3	0 1	0 36	0 29	0 42	0 32	0 31	0 32	0 19	0 33	0 25	0 45
tig00000650	1585281	T	A	0 45	0 53	0 40	0 20	0 56	0 51	0 43	0 49	0 52	0 50	0 22	0 2	0 12	0 51	0 27	0 35	0 52	0 15	0 48	0 7	0 15	0 14	0 26	0 18	0 44	0 52	0 17	0 10	0 15	0 15	0 32	0 41	0 11	0 2	0 3	0 1	0 36	0 30	0 41	0 37	0 34	0 37	0 18	0 37	0 25	0 45
tig00000650	1585281	T	AA	0 45	0 53	0 40	0 20	0 56	0 51	0 43	0 49	0 52	0 50	0 22	0 2	0 12	0 51	0 27	0 35	0 52	0 15	0 48	0 7	0 15	0 14	0 26	0 18	0 44	0 52	0 17	0 10	0 15	0 15	0 32	0 41	0 11	0 2	0 3	0 1	0 36	0 30	0 41	0 37	0 34	0 37	0 18	0 37	0 25	0 45
tig00000650	1585281	T	C	0 45	0 53	0 40	0 20	0 56	0 51	0 43	0 49	0 52	0 50	0 22	0 2	0 12	0 51	0 27	0 35	0 52	0 15	0 48	0 7	0 15	0 14	0 26	0 18	0 44	0 52	0 17	0 10	0 15	0 15	0 32	0 41	0 11	0 2	0 3	0 1	0 36	0 30	0 41	0 37	0 34	0 37	0 18	0 37	0 25	0 45
tig00000650	1585318	A	G	0 42	0 52	0 37	0 16	0 58	0 47	0 43	0 47	0 51	0 51	0 22	0 6	0 12	0 49	0 23	0 30	0 48	0 19	0 46	0 7	0 12	0 10	0 25	0 19	0 42	0 42	0 21	0 12	0 13	0 16	0 27	0 45	0 10	0 2	0 2	0 1	0 34	0 26	0 40	0 30	0 35	0 41	0 12	0 29	0 26	0 36
tig00000650	1585329	C	G	0 43	0 47	0 33	0 16	0 57	0 49	0 44	0 41	0 46	0 48	0 20	0 7	0 15	0 57	0 23	0 33	0 51	0 19	0 43	0 8	0 12	0 11	0 23	0 19	0 38	0 37	0 21	0 13	0 13	0 15	0 21	0 20	0 3	0 1	0 2	0 1	0 31	0 25	0 43	0 27	0 35	0 39	0 10	0 27	0 26	0 38
tig00000650	1585329	C	T	0 43	0 47	0 33	0 16	0 57	0 49	0 44	0 41	0 46	0 48	0 20	0 7	0 15	0 57	0 23	0 33	0 51	0 19	0 43	0 8	0 12	0 11	0 23	0 19	0 38	0 37	0 21	0 13	0 13	0 15	0 21	21 20	6 3	0 1	0 2	0 1	0 31	0 25	0 43	0 27	0 35	0 39	0 10	0 27	0 26	0 38
tig00000650	1585331	G	A	0 43	0 47	0 30	0 15	0 56	0 50	0 43	0 39	0 45	0 50	0 18	0 8	0 15	0 57	0 23	0 32	0 51	0 18	0 40	0 8	0 12	0 11	0 24	0 17	0 38	0 36	0 20	0 15	0 14	0 15	0 22	0 41	0 9	0 1	0 1	0 1	0 30	0 20	0 38	16 10	0 35	0 40	0 11	0 25	0 25	0 34
tig00000650	1585333	AT	C	0 41	0 47	0 29	0 15	0 54	0 50	0 41	0 35	0 45	0 52	0 19	0 8	0 14	0 53	0 23	0 30	0 51	0 18	0 42	0 8	0 12	0 10	0 24	0 15	0 37	0 34	0 18	0 13	0 14	0 15	0 22	0 41	0 9	0 1	0 0	0 1	0 29	0 21	0 37	0 26	0 31	0 38	0 11	0 26	0 24	0 35
tig00000650	1585364	TGCACACT	CGC	0 39	0 45	0 32	0 10	0 60	0 42	0 40	0 33	0 48	0 48	0 21	0 8	0 13	0 48	0 13	0 27	0 56	0 20	0 30	0 5	0 12	0 9	0 20	0 17	0 31	0 26	0 16	0 9	0 10	0 18	0 15	0 31	0 9	0 1	0 2	0 1	0 27	0 16	0 33	0 20	0 30	0 37	0 6	0 25	0 19	0 26
tig00000650	1585364	TGCA	CGCC	0 39	0 45	0 32	0 10	0 60	0 42	0 40	0 33	0 48	0 48	0 21	0 8	0 13	0 48	0 13	0 27	0 56	0 20	0 30	0 5	0 12	0 9	0 20	0 17	0 31	0 26	0 16	0 9	0 10	0 18	0 15	0 31	0 9	0 1	0 2	0 1	0 27	0 16	0 33	0 20	0 30	0 37	0 6	0 25	0 19	0 26
tig00000650	1585364	T	G	0 39	0 45	0 32	0 10	0 60	0 42	0 40	0 33	0 48	0 48	0 21	0 8	0 13	0 48	0 13	0 27	0 56	0 20	0 30	0 5	0 12	0 9	0 20	0 17	0 31	0 26	0 16	0 9	0 10	0 18	0 15	0 31	0 9	0 1	0 2	0 1	0 27	0 16	0 33	0 20	0 30	0 37	0 6	0 25	0 19	0 26
tig00000650	1585365	G	C	0 39	0 45	0 32	0 10	0 60	0 42	0 40	0 33	0 48	0 48	0 21	0 8	0 13	0 48	0 13	0 27	0 56	0 20	0 30	0 5	0 12	0 9	0 20	0 17	0 31	0 26	0 16	0 9	0 10	0 18	0 15	0 31	0 9	0 1	0 2	0 1	0 27	0 16	0 33	0 20	0 30	0 37	0 6	0 25	0 19	0 26
tig00000650	1585367	A	G	0 39	0 45	0 32	0 10	0 60	1 42	0 40	0 33	0 48	0 48	0 21	0 8	0 13	0 48	0 13	0 27	0 56	0 20	0 30	0 5	0 12	0 9	0 20	0 17	0 31	0 26	0 16	0 9	0 10	0 18	0 15	0 31	0 9	0 1	0 2	0 1	0 27	0 16	0 33	0 20	0 30	0 37	0 6	0 25	0 19	0 26
tig00000650	1585375	GA	AT	0 43	0 45	0 35	0 10	0 68	0 44	0 50	0 39	0 58	0 49	0 26	0 9	0 14	0 54	0 15	0 33	0 65	0 24	0 32	0 5	0 13	0 10	0 20	0 18	0 36	0 29	0 18	0 10	0 10	0 19	0 16	0 31	0 8	0 1	0 2	0 1	0 29	0 16	0 36	0 21	0 29	0 37	0 6	0 24	0 21	0 27
tig00000650	1585376	A	T	0 43	0 45	0 35	0 10	0 68	0 44	0 50	0 39	0 58	0 49	0 26	0 9	0 14	0 54	0 15	0 33	0 65	0 24	0 32	0 5	0 13	0 10	0 20	1 18	0 36	0 29	0 18	0 10	0 10	0 19	0 16	0 31	0 8	0 1	0 2	0 1	0 29	0 16	0 36	0 21	0 29	0 37	0 6	0 24	0 21	0 27
tig00000650	1585380	T	C	0 43	0 41	0 36	0 11	0 70	0 42	0 51	0 37	0 58	0 49	0 28	0 10	0 15	0 54	0 15	0 33	0 64	0 21	1 28	0 5	0 13	0 12	0 19	0 19	0 38	0 31	0 20	0 11	0 11	0 21	0 17	0 30	0 8	0 1	0 2	0 2	0 26	0 17	0 37	0 18	0 28	0 37	0 6	0 24	0 21	0 26
tig00000650	1585388	A	C	0 42	0 39	0 40	0 12	0 67	0 44	0 53	0 40	0 56	0 53	0 26	0 10	0 14	0 51	0 15	0 30	0 62	0 21	0 26	0 6	0 15	0 13	0 18	0 22	0 44	0 28	0 20	0 11	0 13	0 20	0 16	0 29	0 7	0 1	0 3	0 2	0 27	0 13	0 34	0 19	0 28	0 35	0 6	0 26	0 20	0 25
tig00000650	1585389	G	T	0 43	0 39	0 40	0 12	0 66	0 43	0 53	0 40	0 57	0 53	0 26	0 10	0 14	0 52	0 15	0 30	0 62	0 21	0 25	0 6	0 15	0 13	0 19	0 22	0 45	0 28	0 19	0 11	0 12	0 19	9 6	10 20	3 4	0 1	0 3	0 2	0 28	0 11	0 35	0 20	0 27	0 35	0 6	0 26	0 19	0 25
tig00000650	1585404	G	C	0 54	0 43	0 44	0 15	0 68	0 48	0 55	0 41	0 66	0 50	0 26	0 8	0 16	0 63	0 15	0 32	0 61	0 22	0 25	0 5	0 18	0 15	0 24	0 25	0 49	0 30	0 21	0 9	0 14	0 17	0 16	0 28	0 6	0 1	0 3	0 2	0 27	0 15	0 37	0 24	0 27	0 38	0 6	0 27	0 23	0 20
tig00000650	1585408	TTGTAACAAGAGA	T	0 49	0 40	0 44	0 17	0 63	0 46	0 52	0 37	0 60	0 49	0 27	0 7	0 15	0 59	0 14	0 30	0 61	0 20	0 22	0 6	0 17	0 14	0 23	0 23	0 49	0 33	0 20	0 9	0 15	0 16	0 14	0 26	0 7	0 1	0 3	0 2	0 24	0 16	0 29	0 23	0 24	0 27	0 5	0 22	0 16	0 17
tig00000650	1585447	G	A	44 0	31 0	29 0	13 0	50 0	34 1	42 0	29 0	19 0	36 0	16 0	5 0	10 0	17 0	12 0	20 0	36 0	15 0	10 0	0 6	8 0	5 0	15 0	20 0	46 0	29 0	11 0	8 0	14 0	11 0	0 0	1 0	0 0	0 0	1 0	1 0	0 0	1 0	0 0	0 0	0 0	0 0	0 0	0 0	0 0	0 0
tig00000650	1585447	GCT	AC	0 0	0 0	0 0	0 0	0 0	0 1	0 0	0 0	11 0	1 0	0 0	0 0	0 0	11 0	0 0	0 0	0 0	0 0	0 0	0 6	5 0	1 0	1 0	0 0	2 0	0 0	0 0	0 0	0 0	0 0	0 0	0 0	0 0	0 0	0 0	0 0	0 0	0 0	0 0	0 0	0 0	0 0	0 0	0 0	0 0	0 0
tig00000650	1585447	GC	ACT	0 0	0 0	0 0	0 0	0 0	0 1	0 0	0 0	0 0	0 0	0 0	0 0	0 0	0 0	0 0	0 0	0 0	0 0	0 0	0 6	0 0	0 0	0 0	0 0	0 0	0 0	0 0	0 0	0 0	0 0	0 0	4 0	5 0	0 0	0 0	0 0	0 0	0 0	0 0	1 0	0 0	0 0	0 0	7 0	5 0	4 0
tig00000650	1585447	GC	ACTT	0 0	0 0	0 0	0 0	0 0	0 1	0 0	0 0	0 0	0 0	0 0	0 0	0 0	0 0	0 0	0 0	0 0	0 0	0 0	0 6	0 0	0 0	0 0	0 0	0 0	0 0	0 0	0 0	0 0	0 0	0 0	0 0	0 0	0 0	0 0	0 0	19 0	11 0	17 0	17 0	8 0	6 0	3 0	4 0	2 0	5 0
tig00000650	1585447	GC	ACTTT	0 0	0 0	0 0	0 0	0 0	0 1	0 0	0 0	0 0	0 0	0 0	0 0	0 0	0 0	0 0	0 0	0 0	0 0	0 0	0 6	0 0	0 0	0 0	0 0	0 0	0 0	0 0	0 0	0 0	0 0	0 0	0 0	0 0	0 0	0 0	0 0	0 0	0 0	0 0	1 0	1 0	8 0	0 0	0 0	1 0	3 0
tig00000650	1585447	GCTTTTTTTTTCAT	ACTTTTTTTTTTCAC	0 0	0 0	0 0	0 0	0 0	0 1	0 0	0 0	0 0	0 0	0 0	0 0	0 0	0 0	0 0	0 0	0 0	0 0	0 0	0 6	0 0	0 0	0 0	0 0	0 0	0 0	0 0	0 0	0 0	0 0	6 0	0 0	0 0	0 0	0 0	0 0	0 0	0 0	0 0	0 0	0 0	0 0	0 0	0 0	0 0	0 0
tig00000650	1585447	GC	AT	0 0	0 0	0 0	0 0	0 0	0 1	0 0	0 0	0 0	0 0	0 0	0 0	0 0	0 0	0 0	0 0	0 0	0 0	0 0	0 6	0 0	0 0	0 0	0 0	0 0	0 0	0 0	0 0	0 0	0 0	0 0	0 0	0 0	0 0	0 0	0 0	0 0	0 0	0 0	0 0	0 0	0 0	0 0	0 0	0 0	0 0
tig00000650	1585480	A	T	0 43	0 32	0 33	0 23	0 50	0 35	0 45	0 30	0 37	0 41	0 10	0 5	0 14	0 33	0 11	0 26	0 31	0 13	0 10	0 9	0 13	0 9	0 15	0 20	0 45	0 33	0 9	0 11	0 16	0 11	0 25	0 19	0 6	0 0	0 0	0 1	0 23	0 14	0 19	0 17	0 20	0 17	0 5	0 11	0 13	0 11
tig00000650	1585501	C	T	15 0	14 0	11 0	4 0	21 0	14 0	15 0	8 0	9 0	15 0	3 0	2 0	5 0	3 0	4 0	9 0	14 0	6 0	3 0	0 9	4 0	2 0	7 0	7 0	22 0	14 0	1 0	3 0	8 0	7 0	5 10	4 16	1 4	0 0	0 0	0 0	14 0	9 0	11 0	12 0	14 0	12 0	4 0	7 0	8 0	5 0
tig00000650	1585511	C	CCA	0 19	0 12	0 13	0 14	0 23	0 15	0 19	0 14	0 16	0 22	0 5	0 2	0 8	0 11	0 7	0 14	0 14	0 6	0 5	0 7	0 4	0 5	0 5	0 7	0 21	0 20	0 4	0 6	0 7	0 4	0 19	0 26	0 6	0 0	0 0	0 2	0 18	0 10	0 16	0 13	0 15	0 13	0 5	0 6	0 12	0 10
tig00000650	1585512	G	A	0 19	0 12	0 13	0 14	0 23	0 15	0 19	0 14	0 16	0 22	0 5	0 2	0 8	0 11	0 7	0 14	0 14	0 6	0 5	0 7	0 4	0 5	0 5	0 7	0 21	0 20	0 4	0 6	0 7	0 4	0 19	0 26	0 6	0 0	0 0	0 2	0 18	0 10	0 16	0 13	0 15	0 13	0 5	0 6	0 12	0 10
tig00000650	1585517	A	C	0 17	0 9	0 10	0 12	0 21	0 15	0 19	0 13	0 16	0 21	0 4	0 2	0 7	0 10	0 7	0 14	0 14	0 3	0 5	0 7	0 4	0 5	0 4	0 6	0 20	0 20	0 4	0 6	0 6	0 4	0 20	0 28	0 5	0 0	0 0	0 2	0 18	0 10	0 15	10 5	0 15	0 13	0 5	1 5	0 12	0 9
tig00000650	1585532	C	A	0 12	0 6	0 9	0 10	0 14	0 12	0 15	0 9	0 14	0 17	0 0	0 1	0 3	0 8	0 5	0 10	0 7	0 3	0 5	0 5	0 4	0 4	0 4	0 6	0 14	0 15	0 2	0 4	0 3	0 4	0 19	0 26	0 6	0 0	0 0	0 2	0 20	0 9	0 9	1 14	0 14	0 13	0 5	0 6	10 3	0 9
tig00000650	1585542	CAGTATAACAATCAGTATATA	C	0 0	0 0	0 0	0 0	0 0	0 0	0 0	0 0	0 0	0 0	0 0	0 0	0 0	0 0	0 0	0 0	0 0	0 0	0 0	0 3	0 0	0 0	0 0	0 0	0 0	0 0	0 0	0 0	0 0	0 0	0 0	0 0	0 0	0 0	0 0	0 0	0 0	0 0	0 0	0 0	0 0	0 0	0 0	0 0	0 0	0 0
tig00000650	1585550	C	CA	0 0	0 0	0 0	0 0	0 0	0 0	0 0	0 0	0 0	0 0	0 0	0 0	0 0	0 0	0 0	0 0	0 0	0 0	0 0	0 3	0 0	0 0	0 0	0 0	0 0	0 0	0 0	0 0	0 0	0 0	0 0	9 0	3 0	0 0	0 0	1 0	6 0	2 0	0 0	3 0	4 0	5 0	2 0	1 0	4 0	4 0
tig00000650	1585567	C	T	0 0	0 0	0 0	0 0	0 0	0 0	0 0	0 0	0 0	0 0	0 0	0 0	0 0	0 0	0 0	0 0	0 0	0 0	0 0	0 6	0 0	0 0	0 0	0 0	0 0	0 0	0 0	0 0	0 0	0 0	0 11	0 19	0 7	0 0	0 0	0 2	0 14	0 11	0 10	0 6	0 10	0 8	0 2	0 4	0 9	0 11
tig00000650	1585581	C	T	0 4	0 1	0 4	0 4	0 11	0 3	0 3	0 4	0 0	0 6	0 4	0 0	0 1	0 4	0 1	0 1	0 8	0 0	0 2	0 6	0 2	0 2	0 1	0 2	0 2	0 5	0 3	0 2	0 0	0 0	0 14	0 23	0 7	0 0	0 1	0 1	0 18	0 14	0 11	6 5	0 16	0 13	0 2	0 7	0 16	0 15
tig00000650	1585591	A	G	0 4	0 2	0 4	0 4	0 11	0 3	0 3	0 5	0 0	0 7	0 4	0 0	0 1	0 4	0 1	0 1	0 8	0 0	0 2	0 5	0 2	0 2	0 1	0 2	0 2	0 5	0 3	0 2	0 0	0 0	0 16	0 29	0 9	0 0	0 2	0 1	0 18	0 19	0 15	0 13	0 18	0 13	0 4	0 7	0 22	0 15
tig00000650	1585612	C	T	0 4	0 2	0 4	0 4	0 10	0 3	0 5	0 5	0 0	0 7	0 4	0 0	0 1	0 4	0 1	0 1	0 8	0 0	0 2	0 5	0 2	0 2	0 1	0 3	0 2	0 5	0 3	0 2	0 0	0 0	0 20	0 26	0 8	0 1	0 3	0 1	0 21	0 18	0 16	0 16	0 22	0 15	0 5	0 10	0 29	0 16
tig00000650	1585652	C	T	0 4	0 2	0 4	0 4	0 11	0 3	0 5	0 5	0 0	0 7	0 4	0 0	0 1	0 4	0 1	0 1	0 8	0 0	0 2	0 7	0 2	0 2	0 1	0 3	0 2	0 5	0 3	0 2	0 0	0 0	0 21	0 36	0 9	0 1	0 3	0 1	0 30	0 25	0 18	0 20	0 19	0 19	0 7	0 19	0 35	0 22
tig00000650	1585678	T	G	2 0	2 0	1 0	1 0	1 0	2 0	3 0	3 0	1 0	2 0	3 0	0 0	0 0	3 0	1 0	0 0	3 0	0 0	0 0	0 8	1 0	0 0	1 0	1 0	2 0	3 0	0 0	2 0	1 0	1 0	22 0	29 0	9 0	0 0	3 0	1 0	39 0	31 0	26 0	20 0	27 0	26 0	10 0	24 0	42 0	25 0
tig00000650	1585723	T	C	0 25	0 14	0 11	0 5	0 47	0 33	0 20	0 30	0 23	0 24	0 15	0 4	0 5	0 29	0 5	0 16	0 22	0 10	0 9	0 8	0 10	0 9	0 10	0 6	0 25	0 17	0 10	0 7	0 3	0 12	0 16	0 25	0 11	0 0	0 0	0 1	0 46	0 32	0 27	0 22	0 37	0 36	0 20	0 30	0 49	0 30
tig00000650	1585726	A	T	0 25	0 15	0 13	0 6	0 53	0 36	0 21	0 33	0 25	0 25	0 15	0 5	1 4	0 31	0 5	0 17	0 25	0 11	0 9	0 9	0 11	0 9	0 12	0 7	0 27	0 18	0 10	0 9	0 3	0 13	0 16	0 25	0 11	0 0	0 0	0 1	0 45	0 32	0 26	0 24	0 38	0 37	0 20	0 30	0 50	0 31
tig00000650	1585778	G	GAA	0 33	0 28	0 26	0 17	0 69	0 47	0 36	0 43	0 45	0 37	0 20	0 5	0 10	0 23	0 1	0 27	0 49	0 15	0 12	0 8	0 12	0 11	0 12	0 6	0 43	0 28	0 9	0 13	0 8	0 12	0 10	0 17	0 14	0 0	0 0	0 0	0 46	0 35	0 28	0 19	13 19	0 39	10 14	21 0	24 0	12 21
tig00000650	1585778	GAAAAAAATTTAACAA	TTAAAAAAAATTAGCAG	0 33	0 28	0 26	0 17	0 69	0 47	0 36	0 43	0 45	0 37	0 20	0 5	0 10	0 23	0 1	0 27	0 49	0 15	0 12	0 8	0 12	0 11	0 12	0 6	0 43	0 28	0 9	0 13	0 8	0 12	0 10	0 17	0 14	0 0	0 0	0 0	0 46	0 35	0 28	0 19	0 19	0 39	0 14	0 0	0 0	0 21
tig00000650	1585780	A	AAT	0 33	0 28	0 26	0 17	0 69	0 47	0 36	0 43	0 45	0 37	0 20	0 5	0 10	0 23	0 1	0 27	0 49	0 15	0 12	0 8	0 12	0 11	0 12	0 6	0 43	0 28	0 9	0 13	0 8	0 12	0 10	0 17	0 14	0 0	0 0	0 0	0 46	0 35	0 28	0 19	0 19	0 39	0 14	0 0	0 0	0 21
tig00000650	1585786	T	A	0 33	0 28	0 26	0 17	0 69	0 47	0 36	0 43	0 45	0 37	0 20	0 5	0 10	0 23	0 1	0 27	0 49	0 15	0 12	0 8	0 12	0 11	0 12	0 6	0 43	0 28	0 9	0 13	0 8	0 12	0 10	0 17	0 14	0 0	0 0	0 0	0 46	0 35	0 28	0 19	0 19	0 39	0 14	0 0	0 0	0 21
tig00000650	1585815	A	G	0 51	0 37	0 40	0 27	0 68	0 48	0 39	0 55	0 55	0 50	0 21	0 7	0 12	0 47	0 10	0 33	0 57	0 19	0 28	0 6	0 11	0 12	0 16	0 13	0 51	0 48	0 7	0 16	0 14	0 16	7 12	8 13	8 7	0 0	0 2	0 0	0 44	0 35	0 26	0 24	0 29	0 37	0 32	0 23	0 39	0 42
tig00000650	1585830	A	C	47 0	36 0	46 0	25 0	58 0	41 0	38 0	49 0	62 0	46 0	24 0	6 0	13 0	47 0	15 0	30 0	53 0	17 0	27 9	0 7	10 0	18 0	17 0	15 0	48 0	47 0	7 0	13 0	15 0	12 0	0 19	0 22	0 16	0 0	0 2	0 0	0 40	0 31	0 26	0 26	0 26	0 33	0 33	0 26	0 37	0 39
tig00000650	1585833	AGCTAAT	GGCAAA	0 0	0 0	0 0	0 0	0 0	0 0	0 0	0 0	0 0	0 0	0 0	0 0	0 0	0 0	0 0	0 0	0 0	0 0	0 8	0 6	0 0	0 0	0 0	0 0	0 0	0 0	0 0	0 0	0 0	0 0	0 10	0 9	0 5	0 0	0 2	0 0	0 37	0 31	0 25	0 25	0 21	0 35	0 30	0 23	0 35	0 38
tig00000650	1585836	T	A	0 0	0 0	0 0	0 0	0 0	0 0	0 0	0 0	0 0	0 0	0 0	0 0	0 0	0 0	0 0	0 0	0 0	0 0	0 8	0 6	0 0	0 0	0 0	0 0	0 0	0 0	0 0	0 0	0 0	0 0	0 10	0 9	0 5	0 0	0 2	0 0	0 37	0 31	0 25	0 25	0 21	0 35	0 30	0 23	0 35	0 38
tig00000650	1585836	TAATC	AAAT	0 0	0 0	0 0	0 0	0 0	0 0	0 0	0 0	0 0	0 0	0 0	0 0	0 0	0 0	0 0	0 0	0 0	0 0	0 8	0 6	0 0	0 0	0 0	0 0	0 0	0 0	0 0	0 0	0 0	0 0	5 10	7 9	8 5	0 0	0 2	0 0	0 37	0 31	0 25	0 25	0 21	0 35	0 30	0 23	0 35	0 38
tig00000650	1585857	TTTA	T	0 38	0 29	0 33	0 22	0 47	0 29	0 35	0 45	0 47	0 45	0 23	0 6	0 11	0 50	0 15	0 24	0 42	0 15	0 37	0 6	0 13	0 18	0 20	0 11	0 38	0 39	0 8	0 16	0 16	0 12	0 24	0 22	0 11	0 0	0 2	0 0	0 37	0 33	0 27	0 24	0 17	0 40	0 29	0 18	0 39	0 45
tig00000650	1585868	A	T	0 45	0 35	0 40	0 26	0 53	0 35	0 42	0 50	0 55	0 54	0 26	0 6	0 13	0 56	0 23	0 29	0 47	0 15	0 45	0 7	0 18	0 20	0 25	0 13	0 48	0 46	0 11	0 19	0 21	0 15	0 31	0 31	0 11	0 0	0 3	0 0	0 39	0 30	0 26	0 25	0 16	0 37	0 25	0 19	0 34	0 45
tig00000650	1585876	G	A	0 49	0 37	0 42	0 27	0 57	0 39	0 43	0 53	0 57	0 56	0 30	0 6	0 13	0 60	0 23	0 32	0 48	0 15	0 44	0 6	0 19	0 20	0 26	0 13	0 55	0 48	0 12	0 19	0 22	0 15	0 30	0 30	0 11	0 0	0 3	0 0	0 39	0 32	0 31	0 26	0 18	0 37	0 27	0 21	0 35	0 43
tig00000650	1585877	T	C	0 49	0 36	0 42	0 26	0 56	0 39	0 44	0 53	0 57	0 56	0 30	0 6	0 13	0 60	0 23	0 32	0 48	0 15	15 30	0 6	0 19	0 20	0 26	0 14	0 55	0 47	0 12	0 19	0 22	0 15	0 30	0 31	0 11	0 0	0 3	0 0	0 39	0 32	0 31	0 24	10 8	0 37	8 17	23 0	34 0	19 24
tig00000650	1585884	C	T	0 45	0 34	0 39	0 23	0 55	0 36	0 41	0 52	0 51	0 56	0 29	0 6	0 13	0 56	0 23	0 31	0 45	0 15	0 44	0 6	0 19	0 17	0 24	0 14	0 53	0 46	0 12	0 19	0 20	0 14	0 27	0 31	0 11	0 0	0 2	0 0	0 39	0 30	0 29	0 23	0 16	0 37	0 25	0 24	0 32	0 43
tig00000650	1585895	T	A	0 37	0 25	0 33	0 20	0 48	0 30	0 38	0 48	1 44	0 50	0 24	0 3	0 11	0 47	0 22	0 25	0 39	0 9	0 36	0 5	0 19	0 14	0 22	0 12	0 47	0 43	0 11	0 16	0 19	0 9	0 29	0 30	0 10	0 0	0 2	0 0	0 37	0 28	0 24	0 21	0 17	0 44	0 25	0 26	0 33	0 31
tig00000650	1585910	C	G	0 25	0 21	0 26	0 14	0 38	0 28	0 30	0 36	0 34	0 38	0 21	0 3	0 9	0 35	0 21	0 20	0 31	0 7	0 27	0 6	0 16	0 13	0 18	0 9	0 38	0 30	0 8	0 14	0 17	0 6	0 22	0 26	0 10	0 0	0 1	0 0	0 32	0 26	0 28	0 24	0 17	0 42	0 27	0 24	0 35	0 28
tig00000650	1585976	C	T	0 25	0 19	0 25	0 10	0 31	0 28	0 19	0 19	0 24	0 18	0 8	0 5	0 5	0 17	0 6	0 21	0 28	0 5	0 10	0 4	0 7	0 7	0 5	0 8	0 21	0 17	0 4	0 5	0 9	0 6	0 16	0 19	0 9	0 0	0 1	0 0	0 31	0 18	0 26	0 22	0 12	0 34	0 15	0 23	0 16	0 26
tig00000650	1585989	TATCAATTA	T	0 25	0 28	0 29	0 14	0 36	0 33	0 29	0 25	0 35	0 24	0 10	0 7	0 5	0 26	0 8	0 29	0 32	0 7	0 14	0 3	0 15	0 9	0 5	0 8	0 32	0 27	0 7	0 10	0 11	0 6	6 10	7 12	3 4	0 0	0 1	0 0	0 30	0 15	0 26	0 22	0 11	0 24	0 16	0 22	0 14	0 27
tig00000650	1586027	C	T	0 0	0 0	0 0	0 0	0 0	0 0	0 0	0 0	0 0	0 0	0 0	0 0	0 0	0 0	0 0	0 0	0 0	0 0	0 4	0 6	0 0	0 0	0 0	0 0	0 0	0 0	0 0	0 0	0 0	0 0	0 14	0 16	0 3	0 0	0 0	0 0	0 23	0 15	0 19	0 20	0 6	0 18	0 13	0 18	0 13	0 23
tig00000650	1586028	A	G	0 0	0 0	2 0	0 0	0 0	1 0	0 0	0 0	0 0	0 0	0 0	0 0	0 0	0 0	0 0	0 0	0 0	1 0	0 4	0 6	0 0	0 0	0 0	0 0	0 0	1 0	0 0	0 0	1 0	0 0	7 14	5 16	2 3	0 0	0 0	0 0	0 23	0 15	0 19	0 20	0 6	0 18	0 13	0 18	0 13	0 23
tig00000650	1586039	CT	C	0 28	0 24	0 25	0 12	0 30	0 33	0 30	0 25	0 35	0 23	0 12	0 6	0 4	0 27	0 8	0 23	0 31	0 7	0 13	0 7	0 15	0 9	0 5	0 8	0 31	0 26	0 9	0 9	0 10	0 7	12 9	0 21	0 6	0 0	0 0	0 0	0 20	0 14	0 18	0 19	0 5	0 15	0 10	0 12	0 12	0 23
tig00000650	1586060	G	A	0 18	0 17	0 12	0 8	0 17	0 20	0 19	0 18	0 20	0 14	0 8	0 4	0 3	0 18	0 5	0 18	0 20	0 4	0 9	0 10	0 12	0 6	0 3	0 5	0 23	0 15	0 6	0 8	0 6	0 5	0 21	0 19	0 5	0 0	0 0	0 0	0 20	0 12	0 15	0 15	0 2	0 9	0 6	0 11	0 9	0 21
tig00000650	1586064	C	G	0 15	0 14	0 10	0 7	0 16	0 17	0 18	0 18	0 19	0 13	0 7	0 3	0 2	0 17	0 5	0 18	0 18	0 4	0 9	0 10	0 12	0 5	0 3	0 5	0 17	0 14	0 6	0 8	0 5	0 3	0 20	0 17	0 4	0 0	0 0	0 0	0 16	0 12	0 15	0 11	0 0	0 9	0 6	0 8	0 10	0 21
tig00000650	1586092	A	T	2 0	1 0	1 0	0 0	1 0	0 0	3 0	0 0	0 0	0 0	2 0	0 0	0 0	0 0	0 0	0 0	0 0	0 0	0 0	0 12	0 0	0 0	0 0	0 0	0 0	0 0	0 0	0 0	1 0	1 0	0 18	0 12	0 2	0 0	0 0	0 0	7 0	8 0	7 0	6 0	0 0	3 0	4 0	7 0	5 0	16 0
tig00000650	1586103	G	A	0 0	0 0	0 0	0 0	0 0	0 0	0 1	0 0	0 0	0 0	0 0	0 0	0 0	0 0	0 2	0 0	0 0	0 0	0 0	0 12	0 0	0 0	0 0	0 0	0 0	0 0	0 0	0 0	0 0	0 0	0 16	0 15	0 0	0 0	0 0	0 0	0 5	0 8	0 6	0 6	0 0	0 3	0 4	0 4	3 2	5 10
tig00000650	1586121	C	T	0 0	0 0	0 0	0 0	0 0	0 0	0 0	0 0	0 0	0 0	0 0	0 0	0 0	0 0	0 0	0 0	0 0	0 0	0 0	0 12	0 0	0 0	0 0	0 0	0 0	0 0	0 0	0 0	0 0	0 0	0 16	0 17	0 0	0 0	0 0	0 0	3 0	10 0	5 0	4 0	0 0	2 0	2 0	2 0	5 0	5 0
tig00000650	1586147	C	A	0 0	0 0	0 0	0 0	0 0	0 0	0 0	0 0	0 0	0 0	0 0	0 0	0 0	0 0	0 0	0 0	0 0	0 0	0 0	0 11	0 0	0 0	0 0	0 0	0 0	0 0	0 0	0 0	0 0	0 0	0 18	0 19	0 1	0 0	0 0	0 0	4 0	7 0	5 0	3 1	0 0	4 0	1 1	0 2	0 7	3 2
tig00000650	1586171	A	C	0 0	0 0	0 0	0 0	0 0	0 0	0 0	0 0	0 0	0 0	0 0	0 0	0 0	0 0	0 0	0 0	0 0	0 0	0 0	0 10	0 0	0 0	0 0	0 0	0 0	0 0	0 0	0 0	0 0	0 0	0 19	1 23	0 1	0 0	0 0	0 0	6 0	5 0	8 0	7 0	6 0	5 0	4 0	6 0	10 0	7 0
tig00000650	1586176	A	G	0 0	0 0	0 0	0 0	0 0	0 0	0 0	0 0	0 0	0 0	0 0	0 0	0 0	0 0	0 0	0 0	0 0	0 0	0 0	0 9	0 0	0 0	0 0	0 0	0 0	0 0	0 0	0 0	0 0	0 0	0 19	0 25	0 1	0 0	0 0	0 0	0 6	0 5	0 8	0 7	4 3	0 6	0 4	0 5	0 10	0 6
tig00000650	1586201	G	A	0 0	0 0	0 0	0 0	0 0	0 0	0 0	0 0	0 0	0 0	0 0	0 0	0 0	0 0	0 0	0 0	0 0	0 0	0 1	0 8	0 0	0 0	0 0	0 0	0 0	0 0	0 0	0 0	0 0	0 0	3 18	4 16	0 2	0 0	0 0	0 0	0 8	0 8	0 10	0 9	0 7	0 7	0 10	0 7	0 16	0 15
tig00000650	1586252	A	G	0 0	0 0	0 0	0 0	0 0	0 0	0 0	0 0	0 0	0 0	0 0	0 0	0 0	0 0	0 0	0 0	0 0	0 0	0 7	0 10	0 0	0 0	0 0	0 0	0 0	0 0	0 0	0 0	0 0	0 0	0 26	0 21	0 1	0 0	0 0	0 0	0 19	0 24	0 26	9 11	0 12	0 14	0 20	0 21	0 36	0 26
tig00000650	1586274	C	T	0 0	0 0	0 0	0 0	0 0	0 0	0 0	0 0	0 0	0 0	0 0	0 0	0 0	0 0	0 0	0 0	0 0	0 0	0 8	0 10	0 0	0 0	0 0	0 0	0 0	0 0	0 0	0 0	0 0	0 0	0 24	0 18	0 2	0 0	0 0	0 0	0 20	0 27	0 26	0 24	0 14	0 17	0 23	0 29	0 49	0 30
tig00000650	1586287	T	C	0 0	1 0	0 0	1 0	2 0	3 0	0 0	1 0	0 0	0 0	0 0	0 0	0 0	0 0	0 0	0 0	2 0	0 0	0 12	0 11	0 0	0 0	0 0	0 0	1 0	0 0	0 0	0 0	1 0	0 0	6 14	6 11	0 3	0 0	0 0	0 0	0 26	0 30	0 34	0 26	0 17	0 25	0 24	0 32	0 48	0 30
tig00000650	1586306	A	G	0 0	0 1	0 1	0 1	0 2	0 5	0 1	0 4	0 1	0 2	0 0	0 0	0 0	0 3	0 1	0 1	0 3	0 0	0 16	0 12	0 0	0 0	0 0	0 0	0 2	0 0	0 2	0 0	0 1	0 0	0 20	0 26	0 4	0 0	0 0	0 0	0 27	0 33	0 38	0 26	0 24	0 25	0 27	0 37	0 55	0 27
tig00000650	1586317	T	C	0 0	0 1	0 1	0 1	0 1	0 6	0 1	0 4	0 1	0 2	0 2	0 1	0 0	0 3	0 1	0 2	0 3	0 0	0 19	0 11	0 0	0 0	0 0	0 0	0 2	0 0	0 2	0 0	0 1	0 0	0 19	0 28	0 5	0 0	0 0	0 0	31 0	36 0	36 0	30 0	15 10	27 0	15 11	0 33	0 54	18 9
tig00000650	1586384	G	T	0 0	0 1	0 1	0 1	0 1	0 4	0 0	0 3	0 1	0 1	0 0	0 1	0 0	0 3	0 0	0 1	0 2	0 0	0 22	0 14	0 0	0 0	0 0	0 0	0 1	0 0	0 1	0 0	0 1	0 0	0 15	0 23	0 4	0 0	0 0	0 0	0 29	0 27	0 32	0 29	7 20	0 33	15 15	43 0	24 17	0 18
tig00000650	1586390	T	C	0 0	0 0	0 0	0 0	0 0	0 0	0 0	0 0	0 0	0 0	0 0	0 0	0 0	0 0	0 0	0 0	0 0	0 0	0 19	0 13	0 0	0 0	0 0	0 0	0 0	0 0	0 0	0 0	0 0	0 0	0 14	0 16	0 4	0 0	0 0	0 0	0 30	0 26	0 34	0 28	0 29	0 34	0 28	0 42	0 40	0 18
tig00000650	1586492	G	A	0 0	0 0	0 0	0 0	0 0	0 0	0 0	0 0	0 0	0 0	0 0	0 0	0 0	0 0	0 0	0 0	0 0	0 0	0 0	0 5	0 0	0 0	0 0	0 0	0 0	0 0	0 0	0 0	0 0	0 0	0 24	0 16	0 4	0 0	0 0	0 2	0 16	0 15	0 22	0 17	0 11	0 22	0 22	0 21	0 12	0 15
tig00000650	1586498	A	G	0 0	0 0	0 0	0 0	0 0	0 0	0 0	0 0	0 0	0 0	0 0	0 0	0 0	0 0	0 0	0 0	0 0	0 0	0 0	0 4	0 0	0 0	0 0	0 0	0 0	0 0	0 0	0 0	0 0	0 0	0 23	0 18	0 4	0 0	0 0	0 2	0 16	0 15	0 23	0 17	3 9	0 22	12 8	20 0	5 6	0 16
tig00000650	1586535	A	C	0 0	0 0	0 0	0 0	0 0	0 0	0 0	0 0	0 0	0 0	0 0	0 0	0 0	0 0	0 0	0 0	0 0	0 0	0 0	0 5	0 0	0 0	0 0	0 0	0 0	0 0	0 0	0 0	0 0	0 0	0 33	0 25	0 5	0 0	0 0	0 2	0 14	0 12	0 16	0 10	0 9	0 17	0 15	0 6	0 12	0 14
tig00000650	1586552	G	A	0 0	0 0	0 0	0 0	0 0	0 0	0 0	0 0	0 0	0 0	0 0	0 0	0 0	0 0	0 0	0 0	0 0	0 0	0 0	0 6	0 0	0 0	0 0	0 0	0 0	0 0	0 0	0 0	0 0	0 0	0 34	0 28	0 5	0 0	0 0	0 2	0 14	0 12	0 18	0 12	0 11	0 18	0 14	0 5	0 11	0 13
tig00000650	1586572	ATG	TTT	0 0	0 0	0 0	0 0	0 0	0 0	0 0	0 0	0 0	0 0	0 0	0 0	0 0	0 0	0 0	0 0	0 0	0 0	0 0	0 6	0 0	0 0	0 0	0 0	0 0	0 0	0 0	0 0	0 0	0 0	0 28	0 26	0 5	0 0	0 0	0 2	0 14	0 12	0 15	0 11	0 8	0 13	0 5	0 3	0 12	0 9
tig00000650	1586579	T	C	0 0	0 0	0 0	0 0	0 0	0 0	0 0	0 0	0 0	0 0	0 0	0 0	0 0	0 0	0 0	0 0	0 0	0 0	0 0	0 8	0 0	0 0	0 0	0 0	0 0	0 0	0 0	0 0	0 0	0 0	0 30	0 25	0 6	0 0	0 0	0 2	0 12	0 12	0 16	0 12	0 11	0 14	0 4	0 3	0 12	0 12
tig00000650	1586593	G	A	0 0	0 0	0 0	0 0	0 0	0 0	0 0	0 0	0 0	0 0	0 0	0 0	0 0	0 0	0 0	0 0	0 0	0 0	0 0	0 9	0 0	0 0	0 0	0 0	0 0	0 0	0 0	0 0	0 0	0 0	0 22	0 21	0 6	0 0	0 0	0 2	0 11	0 11	0 15	0 13	0 12	0 13	0 2	0 2	0 13	0 14
tig00000650	1586595	T	C	0 0	0 0	0 0	0 0	0 0	0 0	0 0	0 0	0 0	0 0	0 0	0 0	0 0	0 0	0 0	0 0	0 0	0 0	0 0	0 9	0 0	0 0	0 0	0 0	0 0	0 0	0 0	0 0	0 0	0 0	0 21	0 23	0 6	0 0	0 0	0 2	0 11	0 13	0 13	0 12	0 13	0 13	0 2	0 2	0 13	0 14
tig00000650	1586601	TAG	T	0 0	0 0	0 0	0 0	0 0	0 0	0 0	0 0	0 0	0 0	0 0	0 0	0 0	0 0	0 0	0 0	0 0	0 0	0 0	0 8	0 0	0 0	0 0	0 0	0 0	0 0	0 0	0 0	0 0	0 0	3 17	7 10	4 2	0 0	0 0	0 2	0 9	0 13	0 14	0 13	0 12	0 13	0 2	0 2	0 10	0 14
tig00000650	1586608	A	G	0 0	0 0	0 0	0 0	0 0	0 0	0 0	0 0	0 0	0 0	0 0	0 0	0 0	0 0	0 0	0 0	0 0	0 0	0 0	0 8	0 0	0 0	0 0	0 0	0 0	0 0	0 0	0 0	0 0	0 0	0 24	0 23	0 6	0 0	0 0	0 2	0 9	0 13	0 15	0 12	0 12	0 13	0 2	0 2	0 10	0 14
tig00000650	1586624	ACAAAATCTAGACTCTCCAGT	A	0 0	0 0	0 0	0 0	0 0	0 0	0 0	0 0	0 0	0 0	0 0	0 0	0 0	0 0	0 0	0 0	0 0	0 0	0 0	0 5	0 0	0 0	0 0	0 0	0 0	0 0	0 0	0 0	0 0	0 0	0 15	0 18	0 5	0 0	0 0	0 3	0 7	0 6	0 11	0 9	0 12	0 7	0 3	0 2	0 9	0 8
tig00000650	1586631	C	A	0 0	0 0	0 0	0 0	0 0	0 0	0 0	0 0	0 0	0 0	0 0	0 0	0 0	0 0	0 0	0 0	0 0	0 0	0 0	0 5	0 0	0 0	0 0	0 0	0 0	0 0	0 0	0 0	0 0	0 0	0 15	0 18	0 5	0 0	0 0	0 3	0 7	0 6	0 11	0 9	0 12	0 7	0 3	0 2	0 9	0 8
tig00000650	1586643	G	A	0 0	0 0	0 0	0 0	0 0	0 0	0 0	0 0	0 0	0 0	0 0	0 0	0 0	0 0	0 0	0 0	0 0	0 0	0 0	0 5	0 0	0 0	0 0	0 0	0 0	0 0	0 0	0 0	0 0	0 0	0 15	0 18	0 5	0 0	0 0	0 3	0 7	0 6	0 11	0 9	0 12	0 7	0 3	0 2	0 9	0 8
tig00000650	1586668	G	A	0 0	0 0	0 0	0 0	0 0	0 0	0 0	0 0	0 0	0 0	0 0	0 0	0 0	0 0	0 0	0 0	0 0	0 0	0 0	0 5	0 0	0 0	0 0	0 0	0 0	0 0	0 0	0 0	0 0	0 0	0 13	0 31	0 5	0 0	0 0	0 4	0 11	0 7	0 11	0 10	0 15	0 10	0 4	0 3	6 10	4 5
tig00000650	1586673	C	G	0 0	0 0	0 0	0 0	0 0	0 0	0 0	0 0	0 0	0 0	0 0	0 0	0 0	0 0	0 0	0 0	0 0	0 0	0 0	0 5	0 0	0 0	0 0	0 0	0 0	0 0	0 0	0 0	0 0	0 0	0 4	0 32	0 6	0 0	0 1	0 5	0 10	0 7	0 11	0 10	0 17	0 11	0 3	0 2	0 16	0 10
tig00000650	1586673	C	T	0 0	0 0	0 0	0 0	0 0	0 0	0 0	0 0	0 0	0 0	0 0	0 0	0 0	0 0	0 0	0 0	0 0	0 0	0 0	0 5	0 0	0 0	0 0	0 0	0 0	0 0	0 0	0 0	0 0	0 0	9 4	0 32	0 6	0 0	0 1	0 5	0 10	0 7	0 11	0 10	0 17	0 11	0 3	0 2	0 16	0 10
tig00000650	1586731	G	A	0 0	0 0	0 0	0 0	0 0	0 0	0 0	0 0	0 0	0 0	0 0	0 0	0 0	0 0	0 0	0 0	0 0	0 0	0 0	0 1	0 0	0 0	0 0	0 0	0 0	0 0	0 0	0 0	0 0	0 0	0 10	0 41	0 5	0 0	0 1	0 4	0 15	0 5	0 13	0 10	0 11	0 17	0 3	0 5	0 18	0 10
tig00000650	1586768	C	T	0 0	0 0	0 0	0 0	0 0	0 0	0 0	0 0	0 0	0 0	0 0	0 0	0 0	0 0	0 0	0 0	0 0	0 0	0 0	0 3	0 0	0 0	0 0	0 0	0 0	0 0	0 0	0 0	0 0	0 0	0 16	0 25	0 6	0 1	0 1	0 5	0 23	0 6	0 13	0 10	0 10	0 19	0 3	0 9	0 14	0 12
tig00000650	1586786	T	A	0 0	0 0	0 0	0 0	0 0	0 0	0 0	0 0	0 0	0 0	0 0	0 0	0 0	0 0	0 0	0 0	0 0	0 0	0 0	0 3	0 0	0 0	0 0	0 0	0 0	0 0	0 0	0 0	0 0	0 0	0 11	0 16	0 7	0 1	0 1	0 5	0 28	0 9	0 20	0 14	0 14	0 24	0 4	0 13	0 16	0 19
tig00000650	1586797	C	G	0 0	0 0	0 0	0 0	0 0	0 0	0 0	0 0	0 0	0 0	0 0	0 0	0 0	0 0	0 0	0 0	0 0	0 0	0 0	0 3	0 0	0 0	0 0	0 0	0 0	0 0	0 0	0 0	0 0	0 0	0 9	0 10	0 10	0 1	0 1	0 5	0 27	0 11	0 25	0 15	0 12	0 26	0 6	0 17	0 17	0 20
tig00000650	1586806	T	A	0 0	0 0	0 0	0 0	0 0	0 0	0 0	0 0	0 0	0 0	0 0	0 0	0 0	0 0	0 0	0 0	0 0	0 0	0 0	0 3	0 0	0 0	0 0	0 0	0 0	0 0	0 0	0 0	0 0	0 0	0 9	0 7	0 11	0 1	0 1	0 5	30 0	13 0	26 0	6 11	10 1	29 0	5 2	0 18	0 17	10 14
tig00000650	1586836	T	C	0 6	0 3	0 1	0 3	0 4	0 12	0 4	0 9	0 5	0 5	0 0	0 1	0 2	0 6	0 1	0 8	0 4	0 2	0 5	0 4	0 3	0 5	0 3	0 3	0 10	0 7	0 0	0 2	0 0	0 3	1 4	0 3	8 1	0 1	0 2	0 6	0 33	0 13	0 30	0 23	0 12	0 28	0 11	0 21	0 22	0 24
tig00000650	1586843	A	C	0 8	0 5	0 4	0 3	0 10	0 14	0 6	0 13	0 7	0 5	0 1	0 1	0 3	0 7	0 2	0 9	0 5	0 4	0 8	0 4	0 4	0 5	0 5	0 5	0 14	0 10	0 3	0 4	0 1	0 3	0 4	0 6	0 9	0 1	0 3	0 6	0 34	0 16	0 30	0 25	0 12	0 32	0 12	0 21	0 23	0 25
tig00000650	1586875	A	C	0 23	0 26	0 19	0 11	0 41	0 25	0 29	0 31	0 30	0 30	0 12	0 1	0 7	0 27	0 12	0 31	0 21	0 8	0 18	0 4	0 7	0 9	0 16	0 10	0 35	0 30	0 11	0 11	0 8	0 6	0 22	0 19	0 10	0 0	0 2	0 7	43 0	20 0	40 0	16 13	13 4	40 0	9 4	0 30	0 26	14 20
tig00000650	1586885	G	A	0 29	0 30	0 24	0 17	0 49	0 30	0 33	0 37	0 39	0 33	0 14	0 2	0 9	0 36	0 15	0 35	0 25	0 12	0 25	0 4	0 10	0 10	0 19	0 11	0 42	0 35	0 11	0 14	0 14	0 7	0 26	0 25	0 11	0 0	0 2	0 7	46 0	19 0	40 0	16 13	14 9	42 0	10 5	0 34	0 27	14 21
tig00000650	1586922	T	C	0 43	0 52	0 36	0 27	0 77	0 54	0 46	0 54	0 62	0 57	0 26	0 3	0 12	0 56	0 20	0 53	0 51	0 21	0 42	0 5	0 15	0 14	0 27	0 16	0 64	0 48	0 18	0 24	0 27	0 16	0 38	0 38	0 9	0 0	0 2	0 8	0 57	0 24	0 47	0 32	0 30	0 45	0 19	0 40	0 33	0 42
tig00000650	1586926	C	A	0 42	0 53	0 38	0 26	0 81	0 53	0 47	0 51	0 64	0 55	0 27	0 2	0 12	0 57	0 21	0 56	0 50	0 22	0 42	0 5	0 15	0 12	0 28	0 14	0 62	28 20	0 19	0 23	0 28	0 16	0 37	0 39	0 10	0 0	0 1	0 7	0 58	0 25	0 48	0 33	0 29	0 49	0 20	0 41	0 32	1 40
tig00000650	1586938	C	G	0 40	0 48	0 37	0 25	0 76	0 50	0 43	0 46	0 63	0 53	0 28	0 2	0 10	0 56	0 21	0 49	0 50	0 21	0 38	0 7	0 14	0 10	0 24	0 13	0 58	0 41	0 17	0 22	0 27	0 15	0 36	0 39	0 8	0 0	0 1	0 4	0 60	0 24	0 48	0 32	0 30	0 47	0 18	0 38	0 39	0 37
tig00000650	1586962	A	G	0 30	0 36	0 26	0 22	0 68	0 43	0 26	0 32	0 49	0 40	0 23	0 2	0 7	0 47	0 13	0 37	0 42	0 16	0 29	0 7	0 10	0 8	0 18	0 11	0 48	0 29	0 12	0 16	0 23	0 12	0 25	0 29	0 7	0 0	0 1	0 4	0 56	0 23	0 43	0 31	0 32	0 49	0 23	0 35	0 34	0 41
tig00000650	1586965	T	C	0 30	0 37	0 28	0 21	0 66	0 44	0 22	0 34	0 44	0 39	0 21	0 3	0 8	0 46	0 13	0 36	0 43	0 15	0 29	0 7	0 10	0 7	0 18	0 11	0 49	0 27	0 12	0 15	0 23	0 13	0 22	0 29	0 7	0 0	0 1	0 4	0 57	0 24	0 43	0 29	0 29	0 45	0 21	0 33	0 31	0 41
tig00000650	1586970	G	C	0 32	0 34	0 33	0 19	0 60	0 46	0 26	0 34	0 45	0 36	0 20	0 3	0 9	0 44	0 15	0 33	0 43	0 15	0 27	0 8	0 9	0 7	0 16	0 10	0 48	0 29	0 12	0 14	0 21	0 14	0 21	0 29	0 7	0 0	0 1	0 3	0 57	0 24	0 43	0 28	0 29	0 47	0 24	0 35	0 31	0 40
tig00000650	1586981	G	A	0 31	0 31	0 32	0 20	0 57	0 47	0 30	0 31	0 43	0 42	0 17	0 3	0 12	0 44	0 11	0 35	0 49	0 11	0 30	0 9	0 9	0 7	0 13	0 10	1 44	0 27	0 14	0 13	0 17	0 12	0 23	0 32	0 7	0 0	0 1	0 3	0 57	0 22	0 44	0 24	0 31	0 50	0 21	0 36	15 15	23 19
tig00000650	1586985	C	A	0 29	0 30	0 31	0 18	0 59	0 46	0 28	0 31	0 42	0 41	0 17	0 4	0 14	0 41	0 11	0 37	0 48	0 11	0 27	0 9	0 8	0 6	0 14	0 9	0 43	0 26	0 15	0 11	0 17	0 12	9 15	18 17	6 1	0 0	0 1	0 3	0 55	0 25	0 44	0 22	0 33	0 51	0 22	0 40	0 28	0 40
tig00000650	1586986	G	A	0 30	0 29	0 31	0 19	0 60	0 45	0 28	0 32	0 43	0 40	0 17	0 4	0 13	0 41	0 11	0 36	0 46	0 10	0 26	0 9	0 7	0 5	0 14	0 9	0 43	0 26	0 15	0 11	0 17	0 11	0 24	0 35	0 6	0 0	0 1	0 3	0 56	0 25	0 45	0 22	0 35	0 51	0 22	0 39	0 29	0 41
tig00000650	1587024	GC	TG	0 17	0 13	0 17	0 11	0 33	0 24	0 17	0 16	0 20	0 22	0 5	0 4	0 11	0 24	0 5	0 15	0 23	0 4	0 15	0 9	0 4	0 4	0 8	0 6	0 23	0 13	0 7	0 2	0 5	0 3	0 17	0 33	0 3	0 1	0 3	0 3	0 46	0 22	0 40	0 28	0 39	0 37	0 26	0 33	0 36	0 33
tig00000650	1587025	C	G	0 17	0 13	0 17	0 11	0 33	0 24	0 17	0 16	0 20	0 22	0 5	0 4	0 11	0 24	0 5	0 15	0 23	0 4	0 15	0 9	0 4	0 4	0 8	0 6	0 23	0 13	0 7	0 2	0 5	0 3	0 17	0 33	0 3	0 1	0 3	0 3	0 46	0 22	0 40	0 28	0 39	0 37	0 26	0 33	0 36	0 33
tig00000650	1587031	TTTTG	ATTTT	0 17	0 10	0 14	0 11	0 35	0 21	0 18	0 13	0 17	0 22	0 3	0 5	0 12	0 22	0 4	0 13	0 22	0 3	0 15	0 9	0 4	0 5	0 7	0 5	0 19	0 14	0 7	0 3	0 4	0 2	0 16	0 32	0 3	0 1	0 3	0 3	0 43	0 22	0 37	0 28	0 33	0 32	0 29	0 25	0 34	0 29
tig00000650	1587031	TTTTGTTT	ATTTTTTC	0 17	0 10	0 14	0 11	0 35	0 21	0 18	0 13	0 17	0 22	0 3	0 5	0 12	0 22	0 4	0 13	0 22	0 3	0 15	0 9	0 4	0 5	0 7	0 5	0 19	0 14	0 7	0 3	0 4	0 2	0 16	0 32	0 3	0 1	0 3	0 3	0 43	0 22	0 37	0 28	0 33	0 32	0 29	0 25	0 34	0 29
tig00000650	1587035	GTTTTG	TTTTTT	0 17	0 10	0 14	0 11	0 35	0 21	0 18	0 13	0 17	0 22	0 3	0 5	0 12	0 22	0 4	0 13	0 22	0 3	0 15	0 9	0 4	0 5	0 7	0 5	0 19	0 14	0 7	0 3	0 4	0 2	0 16	0 32	0 3	0 1	0 3	0 3	0 43	0 22	0 37	0 28	0 33	0 32	0 29	0 25	0 34	0 29
tig00000650	1587035	GTTTTG	TTTTTTT	0 17	0 10	0 14	0 11	0 35	0 21	0 18	0 13	0 17	0 22	0 3	0 5	0 12	0 22	0 4	0 13	0 22	0 3	0 15	0 9	0 4	0 5	0 7	0 5	0 19	0 14	0 7	0 3	0 4	0 2	0 16	0 32	0 3	0 1	0 3	0 3	0 43	0 22	0 37	0 28	0 33	0 32	0 29	0 25	0 34	0 29
tig00000650	1587039	T	C	0 17	0 10	0 14	0 11	0 35	0 21	0 18	0 13	0 17	0 22	0 3	0 5	0 12	0 22	0 4	0 13	0 22	0 3	0 15	0 9	0 4	0 5	0 7	0 5	0 19	0 14	0 7	0 3	0 4	0 2	0 16	0 32	0 3	0 1	0 3	0 3	0 43	0 22	0 37	0 28	0 33	0 32	0 29	0 25	0 34	0 29
tig00000650	1587045	TAACC	CAA	0 28	0 14	0 22	0 18	0 49	0 32	0 27	0 19	0 24	0 30	0 3	0 6	0 13	0 27	0 6	0 19	0 29	0 7	0 24	0 8	0 4	0 8	0 12	0 7	0 32	0 18	0 9	0 4	0 6	0 2	0 14	0 38	0 5	0 1	0 3	0 3	0 26	0 24	0 38	0 28	0 34	0 36	0 28	0 29	0 33	0 27
tig00000650	1587064	T	A	0 28	0 15	0 24	0 18	0 45	0 31	0 27	0 14	0 28	0 26	0 4	0 6	0 14	0 23	0 5	0 16	0 26	0 8	0 25	0 8	0 3	0 7	0 10	0 7	0 31	0 18	0 9	0 4	0 6	0 2	5 5	10 27	4 2	0 1	0 1	0 2	0 31	0 22	0 38	0 30	0 32	0 42	0 28	0 27	0 31	0 28
tig00000650	1587068	T	C	0 23	0 14	0 20	0 15	0 41	0 29	0 22	0 12	0 27	0 23	0 4	0 5	0 13	0 20	0 3	0 16	0 24	0 5	0 23	0 8	0 3	0 7	0 10	0 7	0 27	0 17	0 8	0 4	0 6	0 1	0 10	0 36	0 6	0 0	0 1	0 2	0 31	0 20	0 40	0 29	0 34	0 40	0 30	0 25	0 32	0 25
tig00000650	1587075	C	T	0 22	0 12	0 14	0 14	0 33	0 23	0 18	0 6	0 20	0 18	0 2	0 5	0 11	0 15	0 2	0 12	0 15	0 5	0 18	0 8	0 2	0 6	0 8	0 4	0 22	0 12	0 6	0 3	0 4	0 1	0 5	0 31	0 6	0 0	0 1	0 1	0 31	0 21	0 37	0 28	0 34	0 37	0 28	0 23	0 33	0 22
tig00000650	1587081	T	A	18 0	9 0	12 0	10 0	27 0	23 0	15 0	7 0	21 0	12 0	1 0	4 0	8 0	13 0	2 0	10 0	14 0	5 0	13 0	0 8	3 0	6 0	6 0	3 0	18 0	11 0	4 0	3 0	2 0	1 0	6 0	7 27	4 3	0 0	1 0	1 0	32 0	25 0	37 0	29 0	32 0	35 0	29 0	28 0	32 0	27 0
tig00000650	1587096	T	C	0 26	0 16	0 17	0 11	0 35	0 32	0 28	0 12	0 22	0 18	0 3	0 3	0 7	0 24	0 5	0 15	0 21	0 9	0 19	0 8	0 4	0 10	0 6	0 5	0 26	0 14	0 4	0 4	0 5	0 2	0 12	0 35	0 6	0 0	0 0	0 1	0 27	0 24	0 29	0 28	0 37	0 40	0 26	0 31	0 29	0 26
tig00000650	1587105	T	A	0 30	0 21	0 23	0 15	0 38	0 37	0 32	0 17	0 29	0 24	0 5	0 3	0 9	0 27	0 8	0 19	0 24	0 11	0 22	0 7	0 6	0 11	0 8	0 9	0 31	0 16	0 5	0 6	0 6	0 4	0 13	0 39	0 6	0 0	0 0	0 1	0 29	0 20	0 31	0 30	0 42	0 39	0 26	0 31	0 30	0 27
tig00000650	1587106	A	T	0 31	0 21	0 23	0 15	0 41	0 37	0 34	0 18	0 29	0 24	0 5	0 4	0 9	0 28	0 8	0 19	0 24	0 11	0 22	0 7	0 6	0 11	0 9	0 9	0 31	0 16	0 5	0 6	0 6	0 4	0 13	0 40	0 6	0 0	0 0	0 1	0 30	0 21	0 30	0 30	0 42	0 41	0 26	0 34	0 31	0 27
tig00000650	1587111	G	A	0 34	0 23	0 27	0 15	0 42	0 43	0 37	0 19	0 33	0 26	0 5	0 4	0 9	0 31	0 11	0 20	0 30	0 11	0 23	0 7	0 6	0 12	0 10	0 9	0 35	0 18	0 7	0 7	0 6	0 5	0 13	0 40	0 6	0 0	0 0	0 1	0 28	0 22	0 34	0 32	0 41	0 40	0 25	0 33	0 31	0 28
tig00000650	1587126	G	A	0 41	0 28	0 31	0 15	0 54	0 47	0 38	0 20	0 42	0 33	0 5	0 5	0 9	0 36	0 12	0 25	0 36	0 13	0 25	0 7	0 6	0 12	0 11	0 10	0 36	0 19	0 7	0 10	0 7	0 6	0 15	0 36	0 6	0 0	0 0	0 0	0 28	0 25	0 33	18 17	0 44	0 40	0 25	0 34	0 30	0 27
tig00000650	1587133	A	G	0 39	0 28	0 29	0 14	0 48	0 41	0 31	0 19	0 38	0 30	0 5	0 4	0 8	0 33	0 12	0 24	0 34	0 12	0 19	0 7	0 6	0 9	0 9	0 10	0 31	0 18	0 7	0 8	0 7	0 6	0 15	0 31	0 6	0 0	0 0	0 0	0 28	0 25	0 33	19 18	0 41	0 42	0 24	0 31	0 32	0 30
tig00000650	1587135	G	A	0 38	0 27	0 28	0 11	0 44	0 41	0 32	0 17	0 35	0 28	0 5	0 4	0 8	0 33	0 11	0 24	0 34	0 12	0 17	0 7	0 6	0 9	0 8	0 10	0 32	0 18	0 7	0 8	0 7	0 6	0 15	0 30	0 5	0 0	0 0	0 0	0 28	0 22	0 31	0 37	0 38	0 41	0 24	0 30	0 32	0 31
tig00000650	1587143	A	G	0 28	0 22	0 23	0 8	0 36	0 33	0 27	0 14	0 32	0 23	0 5	0 3	0 7	0 30	0 10	0 20	0 31	0 9	0 16	0 6	0 6	0 7	0 7	0 8	0 26	0 17	0 6	0 7	0 6	0 6	0 14	0 27	0 6	0 0	0 0	0 0	0 28	0 19	0 34	0 39	0 38	0 42	0 22	0 30	0 32	0 35
tig00000650	1587151	G	T	24 0	19 0	20 0	6 0	31 0	28 0	24 0	14 0	26 0	21 0	4 0	2 0	4 0	26 0	10 0	18 0	24 0	8 0	9 3	0 6	6 0	7 0	7 0	7 0	21 0	10 0	4 0	7 0	5 0	6 0	0 15	0 25	0 7	0 0	0 0	0 0	0 27	0 18	0 32	0 31	0 36	0 40	0 21	0 27	0 26	0 31
tig00000650	1587154	GATATAATTAGTTGTATCATAATCAAACTAAAC	G	0 21	0 15	0 16	0 5	0 24	0 18	0 12	0 13	0 23	0 17	0 4	0 2	0 3	0 18	0 8	0 13	0 16	0 7	0 9	0 6	0 3	0 5	0 4	0 6	0 18	0 8	0 3	0 7	0 2	0 5	0 0	6 2	2 4	0 0	0 0	0 0	0 24	0 15	0 22	0 25	0 26	0 36	0 12	0 24	0 20	0 28
tig00000650	1587158	TAAT	GAAA	0 21	0 15	0 16	0 5	0 24	0 18	0 12	0 13	0 23	0 17	0 4	0 2	0 3	0 18	0 8	0 13	0 16	0 7	0 9	0 6	0 3	0 5	0 4	0 6	0 18	0 8	0 3	0 7	0 2	0 5	5 0	0 2	0 4	0 0	0 0	0 0	0 24	0 15	0 22	0 25	0 26	0 36	0 12	0 24	0 20	0 28
tig00000650	1587173	T	C	0 21	0 15	0 16	0 5	0 24	0 18	0 12	0 13	0 23	0 17	0 4	0 2	0 3	0 18	0 8	0 13	0 16	0 7	0 9	0 6	0 3	0 5	0 4	0 6	0 18	0 8	0 3	0 7	0 2	0 5	0 0	0 2	0 4	0 0	0 0	0 0	0 24	0 15	0 22	0 25	0 26	0 36	0 12	0 24	0 20	0 28
tig00000650	1587196	T	A	0 15	0 12	0 15	0 4	0 18	0 14	0 9	0 7	0 20	0 14	0 2	0 2	0 3	0 12	0 6	0 10	0 15	0 4	0 6	0 8	0 1	0 2	0 5	0 4	0 10	0 5	0 3	0 5	0 2	0 3	0 7	0 17	0 8	0 0	0 0	0 0	0 29	0 19	0 26	0 29	0 28	0 37	0 17	0 35	0 24	0 31
tig00000650	1587206	A	T	0 10	0 7	0 9	0 0	0 13	0 9	0 4	0 2	0 13	0 9	0 0	0 1	0 1	0 8	0 4	0 4	0 12	0 1	0 3	0 10	0 0	0 1	0 2	0 1	0 5	0 3	0 2	0 4	0 1	0 1	0 8	0 17	0 8	0 0	0 0	0 0	0 20	0 18	0 27	0 30	0 26	0 36	0 16	0 34	0 24	0 31
tig00000650	1587226	A	G	0 0	0 0	0 0	0 0	0 0	0 0	0 0	0 0	0 0	0 0	0 0	0 0	0 0	0 0	0 0	0 0	0 0	0 0	0 0	0 10	0 0	0 0	0 0	0 0	0 0	0 0	0 0	0 0	0 0	0 0	0 8	0 24	0 9	0 0	0 0	0 0	0 18	0 20	0 23	0 28	0 23	0 35	0 16	0 34	0 23	0 30
tig00000650	1587230	T	G	0 0	0 0	0 0	0 0	0 0	0 0	0 0	0 0	0 0	0 0	0 0	0 0	0 0	0 0	0 0	0 0	0 0	0 0	0 0	0 11	0 0	0 0	0 0	0 0	0 0	0 0	0 0	0 0	0 0	0 0	0 8	0 21	0 9	0 0	0 0	0 0	0 17	0 20	0 25	0 30	0 24	0 36	0 17	0 32	0 25	0 28
tig00000650	1587239	C	CT	0 0	0 0	0 0	0 0	0 0	0 0	0 0	0 0	0 0	0 0	0 0	0 0	0 0	0 0	0 0	0 0	0 0	0 0	0 0	0 8	0 0	0 0	0 0	0 0	0 0	0 0	0 0	0 0	0 0	0 0	0 4	0 0	0 0	0 0	0 0	0 0	0 14	0 15	0 19	10 12	0 12	0 29	0 14	0 24	0 20	0 17
tig00000650	1587248	T	C	0 0	0 0	0 0	0 0	0 0	0 0	0 0	0 0	0 0	0 0	0 0	0 0	0 0	0 0	0 0	0 0	0 0	0 0	0 0	0 8	0 0	0 0	0 0	0 0	0 0	0 0	0 0	0 0	0 0	0 0	0 4	14 0	3 0	0 0	0 0	0 0	0 14	0 15	0 19	0 12	0 12	0 29	0 14	0 24	0 20	0 17
tig00000650	1587249	C	A	0 0	0 0	0 0	0 0	0 0	0 0	0 0	0 0	0 0	0 0	0 0	0 0	0 0	0 0	0 0	0 0	0 0	0 0	0 0	0 8	0 0	0 0	0 0	0 0	0 0	0 0	0 0	0 0	0 0	0 0	4 4	3 0	7 0	0 0	0 0	0 0	0 14	0 15	0 19	0 12	0 12	0 29	0 14	0 24	0 20	0 17
tig00000650	1587261	G	T	0 0	0 0	0 0	0 0	0 0	0 0	0 0	0 0	0 0	0 0	0 0	0 0	0 0	0 0	0 0	0 0	0 0	0 0	0 0	0 7	0 0	0 0	0 0	0 0	0 0	0 0	0 0	0 0	0 0	0 0	0 10	0 19	0 10	0 0	0 0	0 0	0 14	0 19	0 20	0 22	0 17	0 23	0 17	0 27	0 23	0 19
tig00000650	1587266	T	C	0 0	0 0	0 0	0 0	0 0	0 0	0 0	0 0	0 0	0 0	0 0	0 0	0 0	0 0	0 0	0 0	0 0	0 0	0 0	0 7	0 0	0 0	0 0	0 0	0 0	0 0	0 0	0 0	0 0	0 0	0 10	0 18	0 11	0 0	0 0	0 0	0 14	0 17	0 22	0 23	11 6	0 27	8 9	26 0	23 0	10 8
tig00000650	1587294	T	C	0 9	0 4	0 5	0 2	0 5	0 9	0 7	0 7	0 10	0 5	0 1	0 1	0 1	0 7	0 2	0 5	0 7	0 1	2 2	0 7	0 2	0 1	0 2	0 2	0 8	0 9	0 4	0 0	0 3	0 2	0 16	0 19	0 12	0 0	0 1	0 0	13 0	20 0	17 0	17 0	19 0	21 0	18 0	35 0	29 0	17 0
tig00000650	1587299	T	C	0 13	0 5	0 7	0 3	0 10	0 14	0 10	0 10	0 13	0 5	0 1	0 1	0 3	0 10	0 2	0 5	0 10	0 1	0 5	0 7	0 2	0 3	0 2	0 2	0 10	0 11	0 5	0 0	0 4	0 3	0 14	0 21	0 13	0 0	0 1	0 0	0 15	0 20	0 19	0 19	0 18	0 23	0 18	0 35	0 32	0 17
tig00000650	1587303	G	T	0 16	0 5	0 7	0 6	0 13	0 16	0 12	0 14	0 14	0 6	0 1	0 1	0 3	0 10	0 4	0 5	0 10	0 1	0 5	0 7	0 2	0 4	0 4	0 2	0 12	0 11	0 7	0 0	0 5	0 3	0 15	13 8	5 8	0 0	0 1	0 0	0 16	0 20	0 18	0 18	0 23	0 21	0 18	0 34	0 33	0 16
tig00000650	1587304	T	C	0 17	0 5	0 7	0 6	0 15	0 17	0 14	0 14	0 15	0 6	0 2	0 1	0 3	0 10	0 4	0 6	0 10	0 1	0 6	0 7	0 2	0 4	0 5	0 3	0 12	0 11	0 7	0 0	0 5	0 3	0 16	0 21	0 13	0 0	0 1	0 0	0 13	0 20	0 19	0 20	0 23	0 24	0 18	0 34	0 31	0 17
tig00000650	1587317	G	T	0 30	0 8	0 15	0 10	0 21	0 29	0 19	0 17	0 21	0 14	0 2	0 2	0 4	0 17	0 5	0 11	0 21	0 3	0 15	0 8	0 4	0 5	0 6	0 6	0 17	0 15	0 9	0 1	0 8	0 3	0 20	0 14	0 13	0 0	0 1	0 0	0 16	0 22	0 18	0 18	0 23	0 25	0 20	0 27	0 33	0 14
tig00000650	1587334	AACTTTGCCAGCTAAATTG	A	0 38	0 11	0 19	0 12	0 35	0 40	0 22	0 22	0 30	0 21	0 3	0 6	0 4	0 26	0 5	0 13	0 36	0 6	0 19	0 7	0 7	0 7	0 7	0 7	0 26	0 25	0 14	0 3	0 11	0 4	0 24	0 16	0 13	0 0	0 0	0 0	0 16	0 23	0 17	4 11	0 23	0 26	0 16	0 0	0 17	0 15
tig00000650	1587335	A	G	0 38	0 11	0 19	0 12	0 35	0 40	0 22	0 22	0 30	0 21	0 3	0 6	0 4	0 26	0 5	0 13	0 36	0 6	0 19	0 7	0 7	0 7	0 7	0 7	0 26	0 25	0 14	0 3	0 11	0 4	0 24	0 16	0 13	0 0	0 0	0 0	0 16	0 23	0 17	0 11	0 23	0 26	0 16	0 0	0 17	0 15
tig00000650	1587335	ACTTTGCC	GCTTTGCT	0 38	0 11	0 19	0 12	0 35	0 40	0 22	0 22	0 30	0 21	0 3	0 6	0 4	0 26	0 5	0 13	0 36	0 6	0 19	0 7	0 7	0 7	0 7	0 7	0 26	0 25	0 14	0 3	0 11	0 4	0 24	0 16	0 13	0 0	0 0	0 0	0 16	0 23	0 17	0 11	0 23	0 26	0 16	0 0	0 17	0 15
tig00000650	1587348	A	C	0 38	0 11	0 19	0 12	0 35	0 40	0 22	0 22	0 30	0 21	0 3	0 6	0 4	0 26	0 5	0 13	0 36	0 6	0 19	0 7	0 7	0 7	0 7	0 7	0 26	0 25	0 14	0 3	0 11	0 4	0 24	0 16	0 13	0 0	0 0	0 0	0 16	0 23	0 17	0 11	0 23	0 26	0 16	24 0	22 17	0 15
tig00000650	1587349	A	G	0 38	0 11	0 19	0 12	0 35	0 40	0 22	0 22	0 30	0 21	0 3	0 6	0 4	0 26	0 5	0 13	0 36	0 6	0 19	0 7	0 7	0 7	0 7	0 7	0 26	0 25	0 14	0 3	0 11	0 4	0 24	0 16	0 13	0 0	0 0	0 0	0 16	0 23	0 17	0 11	0 23	0 26	0 16	0 0	0 17	0 15
tig00000650	1587355	T	C	1 50	0 22	0 25	0 18	0 46	0 58	0 35	0 35	0 38	0 33	0 9	0 6	0 7	0 37	0 7	0 22	0 48	0 7	0 23	0 8	0 8	0 13	0 9	0 10	0 34	0 33	0 17	0 4	0 19	0 7	0 28	0 21	0 13	0 0	0 1	0 0	0 22	0 24	0 18	0 18	13 12	0 37	13 9	33 0	23 20	0 19
tig00000650	1587378	T	A	1 0	0 0	0 0	0 0	1 0	1 0	0 0	1 0	0 0	1 0	0 0	0 0	0 0	0 0	0 0	0 0	0 0	0 0	0 13	0 7	0 0	1 0	0 0	0 0	2 0	0 0	0 0	0 0	0 0	0 0	8 16	8 13	7 5	0 0	0 0	0 0	0 24	0 23	0 18	0 25	0 29	0 36	0 17	0 31	0 49	0 19
tig00000650	1587378	TA	AG	0 0	0 0	0 0	0 0	0 0	0 0	0 0	0 0	0 0	0 0	0 0	0 0	0 0	0 0	0 0	0 0	0 0	0 0	0 13	0 7	0 0	0 0	0 0	0 0	0 0	0 0	0 0	0 0	0 0	0 0	0 16	0 13	0 5	0 0	0 0	0 0	0 24	0 23	0 18	0 25	0 29	0 36	0 17	0 31	0 49	0 19
tig00000650	1587400	C	A	0 43	0 25	0 22	0 18	0 41	0 52	0 31	0 30	0 29	0 32	0 12	0 5	0 7	0 29	0 4	0 21	0 50	0 7	0 23	0 5	0 7	0 13	0 8	0 11	0 33	0 26	0 13	0 6	0 17	0 7	0 21	0 24	0 12	0 0	0 0	0 0	0 29	0 26	0 19	0 27	0 28	0 35	0 18	0 31	0 46	0 16
tig00000650	1587401	AG	A	0 29	0 21	0 18	0 13	0 32	0 39	0 25	0 25	0 26	0 27	0 11	0 5	0 6	0 24	0 3	0 15	0 43	0 6	0 19	0 4	0 4	0 11	0 5	0 8	0 27	0 22	0 10	0 4	0 13	0 7	0 19	0 23	0 11	0 0	0 0	0 0	0 28	0 23	0 16	0 28	0 22	0 31	0 14	0 25	0 44	0 17
tig00000650	1587414	G	A	0 14	0 9	0 14	0 12	0 28	0 32	0 25	0 23	0 20	0 22	0 10	0 3	0 6	0 22	0 2	0 15	0 37	0 5	0 11	0 4	0 4	0 10	0 6	0 7	0 24	0 22	0 9	0 4	0 13	0 1	0 18	0 27	0 11	0 0	0 0	0 0	0 30	0 25	0 16	0 29	0 27	0 31	0 14	0 28	0 42	0 18
tig00000650	1587414	GAAAC	AAAAA	0 14	0 9	0 14	0 12	0 28	0 32	0 25	0 23	0 20	0 22	0 10	0 3	0 6	0 22	0 2	0 15	0 37	0 5	0 11	0 4	0 4	0 10	0 6	0 7	0 24	0 22	0 9	0 4	0 13	0 1	0 18	0 27	0 11	0 0	0 0	0 0	0 30	0 25	0 16	0 29	0 27	0 31	0 14	0 28	0 42	0 18
tig00000650	1587421	C	T	0 25	0 20	0 13	0 12	0 27	0 32	0 23	0 22	0 19	0 19	0 10	0 2	0 5	0 19	0 2	0 14	0 35	0 4	0 11	0 4	0 4	0 10	0 4	0 7	0 20	0 18	0 9	0 3	0 11	0 7	0 18	0 27	0 12	0 0	0 0	0 0	0 29	0 26	0 15	0 27	0 27	0 31	0 12	0 27	0 43	0 21
tig00000650	1587441	T	A	0 16	0 10	0 7	0 7	0 14	0 16	0 13	0 16	0 10	0 11	0 8	0 0	0 3	0 8	0 2	0 8	0 21	0 1	3 3	0 3	0 3	0 7	0 5	0 6	0 11	0 9	0 3	0 2	0 8	0 6	0 13	0 25	0 11	0 0	0 0	0 0	0 34	0 21	0 17	0 24	7 20	0 34	12 2	24 0	32 0	9 6
tig00000650	1587455	A	C	0 7	0 5	0 4	0 4	0 5	0 9	0 8	0 6	0 5	0 5	0 3	0 0	0 3	0 1	0 0	0 3	0 11	0 1	0 5	0 1	0 2	0 3	0 1	0 3	0 8	0 4	0 2	0 2	0 2	0 3	0 11	0 27	0 10	0 0	0 0	0 0	0 32	0 23	0 18	0 21	0 30	0 35	0 16	0 23	0 35	0 17
tig00000650	1587475	A	G	0 0	0 0	0 0	0 0	0 0	0 0	0 0	0 0	0 0	0 0	0 0	0 0	0 0	0 0	0 0	0 0	0 0	0 0	0 0	0 2	0 0	0 0	0 0	0 0	0 0	0 0	0 0	0 0	0 0	0 0	0 6	0 21	0 10	0 0	0 0	0 0	0 24	0 17	0 17	0 22	0 26	0 23	0 12	0 19	0 35	0 16
tig00000650	1587500	G	A	0 0	0 0	0 0	0 0	0 0	0 0	0 0	0 0	0 0	0 0	0 0	0 0	0 0	0 0	0 0	0 0	0 0	0 0	0 0	0 4	0 0	0 0	0 0	0 0	0 0	0 0	0 0	0 0	0 0	0 0	0 10	0 16	0 12	0 0	0 0	0 0	0 27	0 16	0 18	0 28	0 26	0 18	0 9	0 15	0 34	0 14
tig00000650	1587521	A	G	0 1	0 2	0 0	0 0	0 2	0 2	0 5	0 2	0 0	0 2	0 0	0 1	0 0	0 1	0 0	0 0	0 1	0 0	1 0	0 6	0 0	0 0	0 0	0 2	0 0	0 2	0 0	0 1	0 1	0 0	0 12	0 16	0 14	0 0	0 0	0 0	0 28	0 17	0 20	0 28	11 18	0 19	6 2	14 0	31 0	6 11
tig00000650	1587526	C	G	0 2	0 3	0 1	0 0	0 3	0 4	0 6	0 4	0 0	0 7	0 1	0 1	0 0	0 1	0 0	0 0	0 1	0 1	0 3	0 8	0 1	0 1	0 0	0 3	0 4	0 4	0 0	0 1	0 1	0 0	0 13	0 16	0 13	0 0	0 0	0 0	0 27	0 15	0 19	0 23	0 27	0 19	0 8	0 14	0 30	0 15
tig00000650	1587531	C	A	0 4	0 4	0 3	0 1	0 7	0 5	0 9	0 8	0 2	0 8	0 1	0 1	0 0	0 2	0 1	0 1	0 3	0 2	0 4	0 9	0 2	0 3	0 1	0 4	0 7	0 7	0 1	0 1	0 6	0 1	0 16	0 15	0 13	0 0	0 0	0 0	29 0	18 0	20 0	10 10	16 12	19 0	3 6	0 14	0 31	11 6
tig00000650	1587537	G	T	0 5	0 6	0 4	0 1	0 10	0 12	0 12	0 12	0 3	0 11	0 2	0 1	0 0	0 6	0 1	0 4	0 12	0 3	0 6	0 9	0 2	0 4	0 2	0 7	0 12	0 10	0 2	0 3	0 7	0 1	0 19	0 18	0 12	0 0	0 0	0 0	0 28	0 18	0 17	0 17	0 28	0 19	0 7	0 15	0 31	0 18
tig00000650	1587545	AC	A	0 11	0 9	0 4	0 2	0 17	0 15	0 15	0 18	0 7	0 12	0 2	0 1	0 1	0 8	0 1	0 5	0 18	0 3	0 7	0 9	0 2	0 4	0 3	0 7	0 18	0 14	0 3	0 3	0 10	0 2	0 20	0 16	0 11	0 0	0 0	0 0	0 27	0 18	0 21	0 15	0 28	0 20	0 6	0 12	0 34	0 20
tig00000650	1587552	A	T	0 11	0 9	0 4	0 2	0 17	0 15	0 15	0 18	0 7	0 12	0 2	0 1	0 1	0 8	0 1	0 5	0 18	0 3	0 7	0 9	0 2	0 4	0 3	0 7	0 18	0 14	0 3	0 3	0 10	0 2	0 20	0 16	0 11	0 0	0 0	0 0	0 27	0 18	0 21	0 15	0 28	0 20	0 6	0 12	0 34	0 20
tig00000650	1587593	G	C	0 32	0 21	0 14	0 12	0 43	0 47	0 45	0 46	0 25	0 32	0 7	0 4	0 10	0 31	0 3	0 27	0 34	0 5	0 11	0 10	0 4	0 13	0 9	0 12	0 44	0 29	0 7	0 11	0 16	0 7	0 24	0 29	0 12	0 0	0 0	0 0	0 20	0 16	0 27	0 25	0 25	0 23	0 9	0 7	0 31	0 27
tig00000650	1587606	G	A	36 0	21 0	15 0	13 0	43 0	50 0	51 0	50 0	26 0	33 0	7 0	6 0	10 0	35 0	4 0	28 0	37 0	6 0	5 7	0 11	4 0	14 0	9 0	13 0	48 0	30 0	7 0	11 0	18 0	7 0	0 28	0 34	0 11	0 0	0 0	0 0	0 28	0 18	0 24	0 28	0 20	0 25	0 10	0 9	0 29	0 24
tig00000650	1587613	A	G	36 0	21 0	15 0	11 0	43 0	50 0	51 0	50 0	26 0	33 0	7 0	6 0	10 0	34 0	4 0	28 0	37 0	6 0	5 6	0 10	4 0	14 0	9 0	13 0	47 0	30 0	7 0	11 0	19 0	7 0	0 27	0 33	0 11	0 0	0 0	0 0	0 28	0 19	0 24	0 28	0 19	0 27	0 11	0 9	0 26	0 24
tig00000650	1587624	A	T	0 34	0 19	0 14	0 13	0 40	0 46	0 45	0 46	0 26	0 28	0 7	0 5	0 10	0 34	0 4	0 28	0 35	0 6	0 9	0 10	0 3	0 14	0 9	0 10	0 46	0 26	0 7	0 10	0 18	0 7	0 27	0 33	0 11	0 0	0 0	0 0	0 28	0 19	0 22	0 28	9 10	0 26	0 11	9 0	12 13	0 26
tig00000650	1587626	T	C	0 34	0 18	0 14	0 13	0 40	0 46	0 45	0 46	0 26	0 25	0 6	0 5	0 10	0 32	0 4	0 27	0 35	0 5	0 8	0 11	0 3	0 13	0 7	0 10	0 44	0 26	0 7	0 10	0 18	0 7	14 11	13 17	4 7	0 0	0 0	0 0	0 29	0 19	0 19	0 27	0 19	0 27	0 11	0 10	0 24	0 24
tig00000650	1587631	GA	G	0 19	0 9	0 6	0 8	0 18	0 22	0 28	0 22	0 17	0 19	0 3	0 3	0 5	0 21	0 2	0 15	0 15	0 2	0 5	0 7	0 2	0 8	0 3	0 5	0 24	0 12	0 4	0 6	0 5	0 4	0 6	0 14	0 7	0 0	0 0	0 0	0 15	0 15	0 15	0 18	0 13	0 23	0 9	0 10	0 18	0 22
tig00000650	1587635	A	G	0 19	0 9	0 6	0 8	0 18	0 22	0 28	0 22	0 17	0 19	0 3	0 3	0 5	0 21	0 2	0 15	0 15	0 2	0 5	0 7	0 2	0 8	0 3	0 5	0 24	0 12	0 4	0 6	0 5	0 4	11 6	12 14	4 7	0 0	0 0	0 0	0 15	0 15	0 15	0 18	0 13	0 23	0 9	0 10	0 18	0 22
tig00000650	1587635	AAAAAGAAGCAAAAGA	GAAAAGAAGCAAAAG	0 19	0 9	0 6	0 8	0 18	0 22	0 28	0 22	0 17	0 19	0 3	0 3	0 5	0 21	0 2	0 15	0 15	0 2	0 5	0 7	0 2	0 8	0 3	0 5	0 24	0 12	0 4	0 6	0 5	0 4	0 6	0 14	0 7	0 0	0 0	0 0	0 15	0 15	0 15	0 18	0 13	0 23	0 9	0 10	0 18	0 22
tig00000650	1587660	T	C	0 18	0 7	0 6	0 8	0 18	0 19	0 25	0 19	0 14	0 17	0 3	0 3	0 4	0 19	0 1	0 13	0 15	0 2	0 5	0 9	0 1	0 7	0 1	0 5	0 19	0 9	0 4	0 4	0 5	0 4	0 19	0 29	0 11	0 0	0 0	0 0	0 24	0 20	0 16	0 19	7 8	0 25	0 11	10 0	10 13	0 20
tig00000650	1587666	A	T	0 15	0 6	0 5	0 6	0 12	0 17	0 21	0 15	0 10	0 13	0 3	0 3	0 3	0 15	0 1	0 13	0 12	0 2	0 4	0 9	0 1	0 7	0 1	0 5	0 18	0 9	0 3	0 3	0 5	0 3	0 19	0 28	0 12	0 0	0 0	0 0	0 27	0 19	0 18	0 19	0 15	0 24	0 10	0 9	0 21	0 19
tig00000650	1587672	C	G	0 15	0 4	0 3	0 5	0 11	0 14	0 17	0 12	0 8	0 12	0 1	0 3	0 3	0 13	0 1	0 12	0 10	0 2	0 3	0 9	0 1	0 5	0 1	0 4	0 14	0 7	0 2	0 3	0 5	0 2	0 19	0 27	0 13	0 0	0 0	0 0	0 27	0 16	0 17	0 22	0 14	0 24	0 12	0 9	0 22	0 19
tig00000650	1587684	A	G	0 7	0 2	0 2	0 1	0 6	0 7	0 7	0 7	0 4	0 7	0 0	0 2	0 1	0 7	0 1	0 10	0 6	0 2	0 1	0 10	0 0	0 3	0 0	0 1	0 9	0 1	0 0	0 1	0 4	0 1	0 24	0 23	0 12	0 0	0 0	0 0	0 26	0 17	0 17	0 23	0 15	0 23	0 11	0 8	0 20	0 19
tig00000650	1587684	A	T	0 7	0 2	0 2	0 1	0 6	0 7	0 7	0 7	0 4	0 7	0 0	0 2	0 1	0 7	0 1	0 10	0 6	0 2	0 1	0 10	0 0	0 3	0 0	0 1	0 9	0 1	0 0	0 1	0 4	0 1	0 24	0 23	0 12	0 0	0 0	0 0	0 26	0 17	0 17	0 23	0 15	0 23	0 11	0 8	0 20	0 19
tig00000650	1587716	A	G	0 4	0 0	0 0	0 0	0 0	0 0	0 0	0 0	0 0	0 0	0 0	0 0	0 0	0 2	0 1	0 3	0 0	0 0	0 0	0 12	0 0	0 0	0 1	0 0	0 0	0 4	0 0	0 0	0 0	0 0	0 19	0 21	0 13	0 0	0 0	0 0	0 28	0 14	0 16	0 22	0 11	0 15	0 10	0 7	0 14	0 12
tig00000650	1587717	TT	AG	0 4	0 0	0 0	0 0	0 0	0 0	0 0	0 0	0 0	0 0	0 0	0 0	0 0	0 2	0 1	0 3	0 0	0 0	0 0	0 12	0 0	0 0	0 1	0 0	0 0	0 4	0 0	0 0	0 0	0 0	0 18	0 21	0 13	0 0	0 0	0 0	0 28	0 14	0 16	0 21	0 12	0 15	0 10	0 7	0 15	0 13
tig00000650	1587720	AT	A	0 5	0 1	0 0	0 0	0 0	0 0	0 0	0 0	0 0	0 0	0 0	0 0	0 0	0 2	0 1	0 3	0 0	0 0	0 0	0 11	0 0	0 0	0 2	0 0	0 0	0 4	0 0	0 0	0 0	0 0	0 19	0 16	0 12	0 0	0 0	0 0	0 26	0 14	0 15	0 21	0 12	0 15	0 11	0 6	0 15	0 9
tig00000650	1587726	A	G	0 5	0 2	0 0	0 0	0 0	0 0	0 0	0 0	0 0	0 0	0 0	0 0	0 0	0 2	0 1	0 3	0 0	0 0	0 0	0 12	0 0	0 0	0 2	0 0	0 0	0 4	0 0	0 0	0 0	0 0	0 22	0 16	0 12	0 0	0 0	0 0	0 26	0 15	0 15	0 22	0 12	0 15	0 11	0 5	0 15	0 8
tig00000650	1587728	A	G	0 5	0 2	0 0	0 0	0 0	0 0	0 0	0 0	0 0	0 0	0 0	0 0	0 0	0 2	0 1	0 3	0 0	0 0	0 0	0 12	0 0	0 0	0 2	0 0	0 0	0 3	0 0	0 0	0 0	0 0	0 24	0 17	0 12	0 0	0 0	0 0	0 26	0 15	0 14	0 22	5 7	0 15	0 11	6 0	3 12	0 9
tig00000650	1587739	CATT	TATG	0 0	0 0	0 0	0 0	0 0	0 0	0 0	0 0	0 0	0 0	0 0	0 0	0 0	0 0	0 0	0 0	0 0	0 0	0 0	0 14	0 0	0 0	0 0	0 0	0 0	0 0	0 0	0 0	0 0	0 0	0 13	0 12	0 6	0 0	0 0	0 0	0 27	0 16	0 10	0 18	0 9	0 12	0 9	0 5	0 12	0 6
tig00000650	1587742	T	G	5 0	2 0	0 0	0 0	0 0	0 0	0 0	0 0	0 0	0 0	0 0	0 0	0 0	2 0	1 0	3 0	0 0	0 0	0 0	0 14	0 0	0 0	2 0	1 0	0 0	4 0	0 0	0 0	0 0	0 0	13 13	9 12	6 6	0 0	0 0	0 0	0 27	0 16	0 10	0 18	0 9	0 12	0 9	0 5	0 12	0 6
tig00000650	1587757	A	G	0 5	0 2	0 0	0 0	0 0	0 0	0 0	0 0	0 0	0 0	0 0	0 0	0 0	0 2	0 1	0 3	0 0	0 0	0 0	0 11	0 0	0 0	0 2	0 1	0 0	0 4	0 0	0 0	0 0	0 0	0 26	0 21	0 14	0 0	0 0	0 0	0 22	0 17	0 11	0 13	0 8	0 9	0 7	0 4	0 9	0 11
tig00000650	1587757	A	T	0 5	0 2	0 0	0 0	0 0	0 0	0 0	0 0	0 0	0 0	0 0	0 0	0 0	0 2	0 1	0 3	0 0	0 0	0 0	0 11	0 0	0 0	0 2	0 1	0 0	0 4	0 0	0 0	0 0	0 0	0 26	0 21	0 14	0 0	0 0	0 0	0 22	0 17	0 11	0 13	0 8	0 9	0 7	0 4	0 9	0 11
tig00000650	1587772	C	A	0 6	0 2	0 0	0 0	0 0	0 0	0 0	0 0	0 0	0 0	0 0	0 0	0 0	0 2	0 1	0 3	0 0	0 0	0 0	0 9	0 0	0 0	0 2	0 1	0 0	0 4	0 0	0 0	0 0	0 0	0 25	0 23	0 14	0 0	0 0	0 0	0 27	0 18	1 14	0 11	0 9	0 8	0 7	0 4	0 10	0 11
tig00000650	1587784	TAATTTTTTTTTTCTA	ATTTTTTTTTTCTG	0 6	0 2	0 0	0 0	0 0	0 0	0 0	0 0	0 0	0 0	0 0	0 0	0 0	0 2	0 1	0 3	0 0	0 0	0 0	0 8	0 0	0 0	0 2	0 1	0 0	0 4	0 0	0 0	0 0	0 1	0 21	0 17	0 13	0 0	0 0	0 0	0 22	0 21	0 16	0 15	0 7	0 8	0 9	0 0	0 0	0 15
tig00000650	1587803	G	GA	0 2	0 2	0 0	0 0	0 0	0 0	0 0	0 0	0 0	0 0	0 0	0 0	0 0	0 1	0 0	0 0	0 0	0 0	0 0	0 10	0 0	0 0	0 1	0 1	0 0	0 2	0 0	0 0	0 0	0 0	0 17	13 3	0 10	0 0	0 0	0 0	0 18	0 19	0 15	0 14	0 8	0 10	0 10	0 3	0 3	0 14
tig00000650	1587818	T	A	0 0	2 0	0 0	0 0	0 0	0 0	0 0	0 0	0 0	0 0	0 0	0 0	0 0	0 0	0 0	0 0	0 0	0 0	0 0	0 10	0 0	0 0	1 0	0 0	0 0	0 0	0 0	0 0	0 0	0 0	15 0	3 18	7 5	0 0	0 0	0 0	19 0	17 0	14 0	14 0	5 0	11 0	12 0	2 0	2 0	14 0
tig00000650	1587863	TAC	AAG	0 0	0 0	0 0	0 0	0 0	0 0	0 0	0 0	0 1	0 0	0 0	0 0	0 0	0 0	0 0	0 0	0 0	0 0	0 0	0 4	0 0	0 0	0 0	0 0	0 0	0 0	0 0	0 0	0 0	0 0	0 0	0 0	0 0	0 0	0 0	0 0	0 0	0 0	0 0	0 0	0 0	0 0	0 0	0 0	0 0	0 0
tig00000650	1587865	C	G	0 0	0 0	0 0	0 0	0 0	1 0	0 0	0 0	0 1	0 0	0 0	0 0	0 0	0 0	0 0	0 0	0 0	0 0	0 0	0 4	0 0	0 0	0 0	0 0	0 0	0 0	0 0	0 0	0 0	0 0	12 0	21 0	14 0	0 0	0 0	0 0	16 0	20 0	14 0	12 0	5 0	9 0	8 0	5 0	13 0	17 0
tig00000650	1587890	A	G	0 16	0 13	0 4	0 7	0 15	0 17	0 12	0 15	0 21	0 14	0 7	0 0	0 2	0 18	0 3	0 6	0 14	0 3	0 9	0 5	0 2	0 5	0 5	0 8	0 19	0 18	0 4	0 1	0 6	0 3	0 20	0 22	0 14	0 0	0 0	0 0	0 18	0 24	0 15	0 16	0 9	0 13	0 13	0 7	0 15	0 23
tig00000650	1587891	T	A	0 19	0 13	0 4	0 9	0 15	0 17	0 12	0 15	0 21	0 14	0 7	0 0	0 2	0 19	0 3	0 6	0 14	0 3	0 10	0 5	0 2	0 5	0 5	0 8	0 20	0 19	0 4	0 1	0 6	0 3	0 21	0 23	0 14	0 0	0 0	0 0	0 20	0 23	0 15	0 16	0 9	0 12	0 12	0 7	0 14	0 23
tig00000650	1587907	C	T	0 19	0 12	0 4	0 9	0 15	0 17	0 12	0 15	0 22	0 14	0 7	0 0	0 2	0 19	0 3	0 6	0 15	0 3	0 10	0 5	0 2	0 5	0 5	0 8	0 20	0 19	0 4	0 1	0 6	0 3	0 18	0 18	0 14	0 0	0 0	0 0	0 20	0 20	0 19	0 17	0 10	0 13	0 12	0 7	0 18	0 20
tig00000650	1587920	T	G	0 19	0 13	0 4	0 9	0 15	0 17	0 12	0 15	0 22	0 14	0 7	0 0	0 2	0 19	0 3	0 6	0 15	0 3	0 10	0 4	0 2	0 5	0 5	0 8	0 20	0 19	0 4	0 1	0 6	0 3	0 21	0 12	0 16	0 0	0 0	0 0	0 19	0 21	0 17	0 16	0 13	0 13	0 14	0 9	0 22	0 22
tig00000650	1587926	A	G	0 19	0 13	0 4	0 9	0 15	0 16	0 12	0 15	0 22	0 14	0 7	0 0	0 2	0 19	0 3	0 6	0 15	0 3	0 10	0 3	0 2	0 5	0 5	0 8	0 20	0 19	0 4	0 1	0 6	0 3	0 21	0 12	0 17	0 0	0 0	0 0	0 16	0 21	0 17	0 15	0 14	7 4	0 10	0 8	0 23	0 21
tig00000650	1587929	G	A	0 19	0 13	0 4	0 9	0 15	0 17	0 12	0 15	0 22	0 14	0 7	0 0	0 2	0 18	0 3	0 6	0 15	0 3	0 10	0 3	0 2	0 5	0 5	0 6	0 20	0 19	0 4	0 1	0 6	0 3	0 21	0 12	0 17	0 0	0 0	0 0	0 21	0 19	0 15	0 15	2 12	0 11	0 9	0 9	0 23	0 21
tig00000650	1587963	C	T	0 10	0 8	0 2	0 3	0 12	0 11	0 9	0 6	0 15	0 16	0 5	0 1	0 3	0 9	0 3	0 5	0 15	0 2	0 8	0 3	0 3	0 5	0 5	0 7	0 12	0 12	0 3	0 1	0 5	0 3	0 20	0 12	0 15	0 0	0 0	0 0	0 25	0 25	0 20	0 22	0 23	0 14	0 18	0 10	0 24	0 29
tig00000650	1587964	G	A	0 11	0 8	0 1	0 4	0 11	0 11	0 9	0 7	0 15	0 16	0 5	0 2	0 3	0 8	0 3	0 5	0 17	0 2	0 8	0 3	0 3	0 6	0 5	0 6	0 13	0 12	0 3	0 1	0 5	0 3	9 10	4 8	10 6	0 0	0 0	0 0	0 25	0 24	0 18	0 22	0 24	0 15	0 18	0 10	0 24	0 28
tig00000650	1587966	A	G	11 0	8 0	1 0	3 0	11 0	13 0	9 0	9 0	15 0	15 0	5 0	2 0	3 0	7 0	2 0	5 0	16 0	2 0	5 3	0 3	3 0	6 0	5 0	6 0	11 0	13 0	4 0	1 0	5 0	3 0	0 19	0 12	0 16	0 0	0 0	0 0	0 25	0 25	0 19	0 23	0 25	0 14	0 18	0 10	0 26	0 29
tig00000650	1587976	A	T	0 12	0 7	0 5	0 3	0 10	0 15	0 10	0 13	0 16	0 18	0 5	0 2	0 3	0 12	0 3	0 6	0 16	0 2	0 6	0 4	0 4	0 7	0 5	0 4	0 14	0 12	0 4	0 2	0 7	0 4	0 25	0 16	0 16	0 0	0 0	0 0	0 25	0 27	0 21	0 21	0 25	0 16	0 20	0 11	0 30	0 31
tig00000650	1587984	C	T	0 12	0 6	0 5	0 5	0 13	0 15	0 9	0 15	0 12	0 13	0 3	0 2	0 5	3 10	0 2	0 5	0 20	0 1	0 7	0 3	0 4	0 5	0 7	0 2	0 15	0 9	0 4	0 3	0 8	0 3	0 26	0 15	0 16	0 0	0 0	0 0	0 26	0 26	0 21	0 25	0 25	0 19	0 19	0 12	0 30	0 29
tig00000650	1587992	C	T	0 15	0 7	0 6	0 7	0 12	0 17	0 13	0 18	0 13	0 20	0 6	0 3	0 6	0 19	0 5	0 7	0 25	0 1	0 5	0 3	0 5	0 7	0 8	0 4	0 21	0 12	0 4	0 4	0 8	0 3	0 30	0 18	0 12	0 0	0 0	0 0	0 27	0 27	0 21	0 23	0 26	0 18	0 22	0 12	0 29	0 33
tig00000650	1588001	A	G	0 16	0 13	0 6	0 10	0 13	0 18	0 18	0 20	0 14	0 21	0 9	0 3	0 7	0 22	0 8	0 7	0 30	0 1	0 7	0 4	0 6	0 9	0 10	0 4	0 21	0 16	0 5	0 4	0 11	0 5	15 16	0 24	0 12	0 0	0 0	0 0	0 31	0 27	0 22	0 24	0 25	0 20	0 25	0 13	0 28	0 32
tig00000650	1588004	AAG	TAGA	8 0	10 0	2 0	7 0	0 0	3 0	5 0	9 0	5 0	7 0	6 0	0 0	3 0	15 0	7 0	0 0	19 0	0 0	1 3	0 4	3 0	5 0	4 0	2 0	3 0	11 0	3 0	2 0	3 0	4 0	0 11	0 12	0 7	0 0	0 0	0 0	0 28	0 23	0 21	0 21	0 25	0 20	0 26	0 13	0 22	0 29
tig00000650	1588004	AAG	TTGA	0 0	0 0	0 0	0 0	7 0	3 0	5 0	2 0	0 0	3 0	0 0	1 0	2 0	0 0	0 0	3 0	0 0	0 0	0 3	0 4	0 0	0 0	0 0	0 0	9 0	0 0	0 0	0 0	0 0	0 0	0 11	0 12	0 7	0 0	0 0	0 0	0 28	0 23	0 21	0 21	0 25	0 20	0 26	0 13	0 22	0 29
tig00000650	1588006	G	GA	0 0	0 0	0 0	0 0	0 0	0 0	0 0	0 0	0 0	0 0	0 0	0 0	0 0	0 0	0 0	0 0	0 0	0 0	0 3	0 4	0 0	0 0	0 0	0 0	0 0	0 0	0 0	0 0	0 0	0 0	13 11	12 12	5 7	0 0	0 0	0 0	0 28	0 23	0 21	0 21	0 25	0 20	0 26	0 13	0 22	0 29
tig00000650	1588015	TCAT	AAGTCAA	0 0	0 0	0 0	0 0	0 0	0 0	0 0	0 0	0 0	0 0	0 0	0 0	0 0	0 0	0 0	0 0	0 0	0 0	0 3	0 4	0 0	0 0	0 0	0 0	0 0	0 0	0 0	0 0	0 0	0 0	0 11	0 12	0 7	0 0	0 0	0 0	0 28	0 23	0 21	0 21	0 25	0 20	0 26	0 13	0 22	0 29
tig00000650	1588015	TCAT	AGTCAA	0 0	0 0	0 0	0 0	0 0	0 0	0 0	0 0	0 0	0 0	0 0	0 0	0 0	0 0	0 0	0 0	0 0	0 0	0 3	0 4	0 0	0 0	0 0	0 0	0 0	0 0	0 0	0 0	0 0	0 0	0 11	0 12	0 7	0 0	0 0	0 0	0 28	0 23	0 21	0 21	0 25	0 20	0 26	0 13	0 22	0 29
tig00000650	1588020	A	T	0 31	0 23	0 6	0 13	0 33	0 30	0 31	0 39	0 30	0 30	0 9	0 4	0 10	0 28	0 11	0 19	0 39	0 3	5 5	0 7	0 13	0 11	0 11	0 11	0 40	0 21	0 8	0 11	0 17	0 8	0 36	0 34	0 13	0 0	0 0	0 0	0 31	0 24	0 28	0 23	13 13	0 19	20 6	15 0	21 0	12 20
tig00000650	1588023	G	GA	0 32	0 23	0 6	0 13	0 37	0 32	0 32	0 41	0 31	0 32	0 9	0 4	0 10	0 29	0 12	0 19	0 40	0 3	0 11	0 7	0 13	0 12	0 12	0 11	0 41	0 22	0 9	0 11	0 18	0 8	0 34	0 31	0 13	0 0	0 0	0 0	0 29	0 22	0 25	0 22	0 26	0 18	0 26	0 14	0 22	0 30
tig00000650	1588043	A	G	0 46	0 34	0 11	0 18	0 49	0 37	0 45	0 47	0 41	0 40	0 12	0 6	0 11	0 45	0 12	0 24	0 51	0 4	0 17	0 9	0 12	0 14	0 13	0 14	0 54	0 26	0 16	0 13	0 26	0 12	22 15	23 16	0 12	0 0	0 0	0 0	0 31	0 27	0 29	0 23	0 28	0 18	0 33	0 16	0 23	0 27
tig00000650	1588052	A	G	0 50	0 36	0 12	0 18	0 52	0 43	0 46	0 47	0 42	0 44	0 12	0 7	0 12	0 51	0 13	0 30	0 57	0 4	0 18	0 9	0 14	0 15	0 17	0 17	0 57	0 27	0 18	0 13	0 27	0 13	0 38	0 40	0 11	0 0	0 0	0 0	0 30	0 29	0 31	0 24	0 29	0 20	0 38	0 18	0 24	0 28
tig00000650	1588057	CT	AA	0 51	0 38	0 14	0 18	0 57	0 45	0 48	0 52	0 44	0 48	0 12	0 8	0 14	0 54	0 14	0 32	0 57	0 4	0 19	0 10	0 14	0 16	0 18	0 18	0 60	0 29	0 18	0 15	0 27	0 14	0 38	0 40	0 11	0 0	0 0	0 0	0 30	0 27	0 28	0 24	0 32	0 20	0 39	0 18	0 25	0 28
tig00000650	1588067	A	C	0 54	0 39	0 19	0 18	0 61	0 40	0 46	0 52	0 48	0 47	0 14	0 6	0 13	0 61	0 14	0 36	0 56	0 4	11 9	0 10	0 12	0 16	0 15	0 20	0 60	0 32	0 19	0 17	0 24	0 14	0 30	0 34	0 12	0 0	0 0	0 0	0 30	0 27	0 31	0 26	18 15	0 21	30 10	16 0	22 0	8 16
tig00000650	1588073	C	A	0 50	0 41	0 16	0 16	0 61	0 40	0 43	0 50	0 41	0 42	0 14	0 6	0 14	0 59	0 14	0 35	0 51	0 3	0 18	0 10	0 11	0 16	0 15	0 19	0 54	0 33	0 18	0 17	0 20	0 14	0 29	0 36	0 13	0 0	0 0	0 0	0 28	0 24	0 26	0 27	0 30	0 20	0 40	4 14	9 16	0 29
tig00000650	1588096	AT	A	0 41	0 30	0 14	0 9	0 49	0 30	0 33	0 38	0 36	0 30	0 8	0 5	0 9	0 42	0 7	0 28	0 32	0 3	0 14	0 10	0 7	0 9	0 10	0 14	0 40	0 21	0 15	0 14	0 17	0 9	0 15	0 29	0 13	0 0	0 0	0 0	0 21	0 26	0 28	0 21	0 31	0 19	0 38	0 26	0 26	0 23
tig00000650	1588096	A	T	0 41	0 30	0 14	0 9	0 49	0 30	0 33	0 38	0 36	0 30	0 8	0 5	0 9	0 42	0 7	0 28	0 32	0 3	0 14	0 10	0 7	0 9	0 10	0 14	0 40	0 21	0 15	0 14	0 17	0 9	11 15	0 29	0 13	0 0	0 0	0 0	0 21	0 26	0 28	0 21	0 31	0 19	0 38	0 26	0 26	0 23
tig00000650	1588101	A	G	0 37	0 28	0 14	0 7	0 46	0 30	0 28	0 37	0 34	0 29	0 7	0 5	0 9	0 40	0 7	0 26	0 31	0 2	0 13	0 10	0 6	0 9	0 10	0 14	0 40	0 21	0 15	0 13	0 15	0 9	0 26	0 25	0 14	0 0	0 0	0 0	0 22	0 27	0 27	0 20	0 26	0 19	0 36	0 24	0 27	0 24
tig00000650	1588109	C	T	0 33	0 22	0 14	0 6	0 40	0 27	0 21	0 28	0 26	0 28	0 7	0 4	0 9	0 41	0 6	0 24	0 27	0 1	0 11	0 10	0 5	0 9	0 9	0 13	0 36	0 18	0 14	0 12	0 13	0 8	12 13	0 22	0 13	0 0	0 1	0 0	0 22	0 28	0 29	0 20	0 28	0 19	0 35	0 25	0 32	0 26
tig00000650	1588123	G	A	0 25	0 19	0 14	0 6	0 30	0 19	0 16	0 18	0 18	0 19	0 7	0 4	0 6	0 35	0 3	0 19	0 23	0 1	0 11	0 8	0 1	0 8	0 8	0 10	0 25	0 15	0 11	0 8	0 8	0 6	0 22	0 17	0 13	0 0	0 1	0 0	0 25	0 23	0 28	0 23	0 27	0 22	0 34	0 26	0 28	0 23
tig00000650	1588128	C	T	0 23	0 17	0 13	0 3	0 29	0 17	0 14	0 18	0 18	0 16	0 7	0 3	0 5	0 30	0 3	0 19	0 22	0 1	0 12	0 8	0 1	0 7	0 8	0 9	0 22	0 12	0 8	0 7	0 7	0 6	0 20	0 16	0 13	0 0	0 1	0 0	0 25	0 23	0 26	0 20	0 25	0 22	0 34	0 24	0 34	0 24
tig00000650	1588133	CTCG	C	0 18	0 15	0 13	0 2	0 22	0 14	0 11	0 13	0 12	0 12	0 5	0 2	0 5	0 23	0 3	0 18	0 15	0 0	0 8	0 7	0 1	0 6	0 7	0 8	0 16	0 11	0 7	0 6	0 3	0 3	0 17	0 15	0 11	0 0	0 1	0 1	0 25	0 22	0 26	0 18	0 26	0 21	0 33	0 24	0 33	0 22
tig00000650	1588140	A	T	0 15	0 12	0 12	0 2	0 19	0 14	0 7	0 12	0 10	0 11	0 5	0 2	0 5	0 20	0 3	0 17	0 13	0 0	0 10	0 6	0 0	0 6	0 7	0 7	0 14	0 11	0 6	0 6	0 3	0 3	0 17	0 19	0 11	0 0	0 1	0 1	0 27	0 20	0 30	0 18	0 25	0 21	25 8	0 24	0 33	0 21
tig00000650	1588154	C	T	0 8	0 7	0 7	0 0	0 13	0 7	0 4	0 8	0 8	0 6	0 5	0 1	0 3	0 11	0 2	0 9	0 6	0 0	0 10	0 4	0 0	0 5	0 3	0 3	0 9	0 10	0 2	0 5	0 1	0 2	0 17	0 19	0 11	0 0	0 1	0 1	0 23	0 19	0 30	0 22	0 31	0 24	0 26	0 22	0 38	0 23
tig00000650	1588157	A	G	0 8	0 5	0 6	0 0	0 10	0 6	0 3	0 7	0 6	0 3	0 5	0 0	0 2	0 10	0 1	0 7	0 6	0 0	0 10	0 4	0 0	0 4	0 2	0 3	0 6	0 8	0 2	0 4	0 1	0 1	0 17	0 20	0 10	0 0	0 1	0 1	23 0	21 0	29 0	23 0	16 15	23 0	7 19	0 21	0 39	12 11
tig00000650	1588163	TAA	CAG	0 0	0 0	0 0	0 0	0 0	0 0	0 0	0 0	0 0	0 0	0 0	0 0	0 0	0 0	0 0	0 0	0 0	0 0	0 10	0 4	0 0	0 0	0 0	0 0	0 0	0 0	0 0	0 0	0 0	0 0	0 12	0 11	0 7	0 0	0 1	0 1	0 24	0 23	0 30	0 24	0 32	0 24	0 26	0 22	0 39	0 24
tig00000650	1588165	A	G	3 0	3 0	2 0	0 0	5 0	4 0	2 0	3 0	0 0	1 0	2 0	0 0	1 0	2 0	0 0	1 0	1 0	0 0	0 10	0 4	0 0	1 0	0 0	0 0	0 0	2 0	0 0	0 0	0 0	1 0	8 12	8 11	4 7	0 0	0 1	0 1	0 24	0 23	0 30	0 24	0 32	0 24	0 26	0 22	0 39	0 24
tig00000650	1588194	A	G	0 1	0 0	0 0	0 0	0 0	0 0	0 0	0 0	0 0	0 0	0 0	0 0	0 0	0 0	0 0	0 0	0 0	0 0	0 17	0 6	0 0	0 0	0 0	0 0	0 0	0 0	0 0	0 0	0 0	0 0	0 17	0 21	0 13	0 0	0 1	0 2	0 21	0 21	0 31	0 27	0 33	0 25	0 22	0 22	0 44	0 25
tig00000650	1588201	T	C	0 1	0 0	0 0	0 0	0 0	0 0	0 0	0 0	0 0	0 0	0 0	0 0	0 0	0 0	0 0	0 0	0 0	0 0	0 19	0 6	0 0	0 0	0 0	0 0	0 0	0 0	0 0	0 0	0 0	0 0	0 19	0 25	0 13	0 0	0 1	0 2	0 21	0 20	0 29	0 26	0 33	0 23	0 16	0 24	0 45	0 25
tig00000650	1588208	C	T	1 0	0 0	0 0	0 0	1 0	0 0	0 0	2 0	0 0	0 0	0 0	0 0	0 0	0 0	0 0	0 0	0 0	0 0	0 21	0 5	0 0	0 0	0 0	0 0	0 0	0 0	0 0	0 0	0 0	0 0	5 16	8 20	6 7	0 0	0 0	2 0	0 22	0 20	0 28	0 27	0 28	0 22	0 18	0 24	0 42	0 27
tig00000650	1588221	GAA	G	0 5	0 9	0 7	0 5	0 8	0 7	0 2	0 5	0 4	0 4	0 1	0 1	0 3	0 8	0 1	0 7	0 2	0 1	0 25	0 6	0 0	0 2	0 3	0 2	0 4	0 5	0 2	0 1	0 1	0 1	0 24	0 30	0 10	0 0	0 0	0 2	0 21	0 21	0 28	0 29	0 27	0 24	0 20	0 24	0 38	0 28
tig00000650	1588225	AAT	C	0 5	0 9	0 7	0 5	0 8	0 7	0 2	0 5	0 4	0 4	0 1	0 1	0 3	0 8	0 1	0 7	0 2	0 1	0 25	0 6	0 0	0 2	0 3	0 2	0 4	0 5	0 2	0 1	0 1	0 1	0 24	0 30	0 10	0 0	0 0	0 2	0 21	0 21	0 28	0 29	0 27	0 24	0 20	0 24	0 38	0 28
tig00000650	1588233	G	A	0 9	0 12	0 8	0 5	0 13	0 14	0 10	0 11	0 12	0 12	0 3	0 1	0 4	0 15	0 4	0 12	0 7	0 4	0 32	0 7	0 1	0 4	0 4	0 3	0 10	0 10	0 4	0 1	0 6	0 1	0 31	0 37	0 10	0 0	0 0	0 2	0 21	0 21	0 28	0 33	0 24	0 24	0 21	0 22	0 43	0 29
tig00000650	1588241	T	C	0 14	0 15	0 13	0 7	0 18	0 18	0 13	0 18	0 14	0 13	0 6	0 1	0 4	0 22	0 5	0 18	0 11	0 5	0 34	0 7	0 3	0 6	0 5	0 4	0 15	0 15	0 4	0 4	0 6	0 3	0 32	22 16	0 11	0 1	0 0	0 2	0 22	0 21	0 27	0 33	0 26	0 24	0 19	0 18	0 40	0 32
tig00000650	1588256	C	A	0 24	0 21	0 20	0 8	0 25	0 24	0 19	0 22	0 26	0 22	0 8	0 1	0 4	0 33	0 5	0 22	0 24	0 8	0 40	0 8	0 4	0 8	0 5	0 8	0 17	0 20	0 7	0 5	0 8	0 4	0 36	0 43	0 12	0 1	0 1	0 3	0 22	0 21	0 28	0 39	0 27	0 28	0 20	0 28	0 44	0 29
tig00000650	1588261	G	T	24 0	21 0	20 0	9 0	25 0	24 0	20 0	22 0	26 0	22 0	8 0	1 0	4 0	33 0	5 0	22 0	24 0	8 0	13 24	0 8	4 0	8 0	5 0	8 0	17 0	11 8	7 0	5 0	8 0	4 0	0 35	0 45	0 12	0 1	0 1	0 4	0 23	0 23	0 26	0 39	0 28	0 29	0 19	0 28	0 43	0 30
tig00000650	1588268	CATCTTAAAGTAATTTTAC	GTA	0 11	0 11	0 19	0 9	0 12	0 24	0 7	0 9	0 26	0 6	0 8	0 0	0 4	0 33	0 5	0 12	0 24	0 8	0 31	0 7	0 4	0 8	0 5	0 7	0 8	0 20	0 7	0 4	0 8	0 4	0 28	0 34	0 12	0 1	0 1	0 4	0 18	0 22	0 22	0 36	0 25	0 23	0 20	0 26	0 40	0 28
tig00000650	1588285	A	G	0 11	0 11	0 19	0 9	0 12	0 24	0 7	0 9	0 26	0 6	0 8	0 0	0 4	0 33	0 5	0 12	0 24	0 8	0 31	0 7	0 4	0 8	0 5	0 7	0 8	0 20	0 7	0 4	0 8	0 4	0 28	0 34	0 12	0 1	0 1	0 4	0 18	0 22	0 22	0 36	0 25	0 23	0 20	0 26	0 40	0 28
tig00000650	1588309	G	C	1 21	0 19	0 19	0 8	0 23	0 22	0 20	0 19	0 25	0 21	0 8	0 1	0 4	0 33	0 5	0 20	0 24	0 7	0 27	0 9	0 4	0 8	0 5	0 5	0 15	0 20	0 7	0 4	0 8	0 4	0 29	0 32	0 14	0 1	0 1	0 4	0 20	0 25	0 23	0 33	0 26	0 25	0 27	0 31	0 44	0 26
tig00000650	1588329	C	T	0 18	0 10	0 11	0 4	0 13	0 11	0 14	0 11	0 16	0 12	0 5	0 0	0 0	0 19	0 3	0 9	0 18	0 3	0 13	0 7	0 4	0 5	0 1	0 4	0 7	0 10	0 5	0 4	0 4	0 3	0 21	0 27	0 13	0 1	0 1	0 4	0 30	0 25	0 18	0 31	0 26	0 30	0 25	17 18	0 43	0 28
tig00000650	1588335	C	T	0 14	0 8	0 8	0 3	0 11	0 9	0 8	0 9	0 14	0 10	0 3	0 0	0 0	0 16	0 1	0 8	0 17	0 3	0 9	0 8	0 3	0 4	0 1	0 3	0 5	0 7	0 3	0 3	0 2	0 3	0 16	0 26	0 12	0 1	0 1	0 4	0 29	0 24	0 20	0 31	0 26	0 30	0 26	0 37	0 43	0 30
tig00000650	1588355	C	A	0 0	0 0	0 0	0 0	0 0	0 0	0 0	0 0	0 0	0 0	0 0	0 0	0 0	0 0	0 0	0 0	0 0	0 0	0 0	0 8	0 0	0 0	0 0	0 0	0 0	0 0	0 0	0 0	0 0	0 0	0 15	0 16	0 12	0 0	0 0	0 4	0 27	0 29	0 20	0 36	0 23	0 31	0 28	0 31	0 45	0 29
tig00000650	1588375	T	C	0 3	0 6	0 1	0 1	0 11	0 5	0 3	0 2	0 1	0 2	0 1	0 0	0 1	0 9	0 0	0 1	0 4	0 1	0 3	1 8	0 2	0 1	0 3	0 0	0 6	0 5	0 4	0 1	0 2	0 0	0 17	0 21	0 11	0 0	0 0	0 3	0 33	0 25	0 18	15 14	0 26	0 31	0 26	0 33	0 47	0 31
tig00000650	1588399	G	A	0 13	0 13	0 9	0 6	0 30	0 22	0 16	0 16	0 15	0 9	0 7	0 2	0 2	0 22	0 5	0 11	0 14	0 4	0 15	0 11	0 10	0 3	0 5	0 3	0 15	0 19	0 7	0 5	0 4	0 3	0 26	0 22	0 14	0 0	0 0	0 3	0 36	0 24	0 23	0 32	0 26	0 41	0 30	0 27	0 41	0 30
tig00000650	1588409	GCAAT	G	0 15	0 14	0 12	0 6	0 30	0 24	0 18	0 23	0 19	0 11	0 10	0 2	0 4	0 28	0 7	0 14	0 18	0 5	0 20	0 12	0 11	0 3	0 6	0 5	0 17	0 24	0 8	0 7	0 6	0 4	0 29	6 10	8 5	0 1	0 0	0 2	0 37	0 22	0 20	0 28	0 22	0 37	0 29	0 23	0 29	0 32
tig00000650	1588411	AATCAA	GATCAT	0 15	0 14	0 12	0 6	0 30	0 24	0 18	0 23	0 19	0 11	0 10	0 2	0 4	0 28	0 7	0 14	0 18	0 5	0 20	0 12	0 11	0 3	0 6	0 5	0 17	0 24	0 8	0 7	0 6	0 4	0 29	0 10	0 5	0 1	0 0	0 2	0 37	0 22	0 20	0 28	0 22	0 37	0 29	0 23	0 29	0 32
tig00000650	1588419	A	T	0 18	0 19	0 14	0 10	0 43	0 28	0 25	0 26	0 21	0 16	0 13	0 2	0 4	0 31	0 10	0 16	0 22	0 6	0 23	0 13	0 12	0 5	0 6	0 8	0 25	0 28	0 10	0 9	0 9	0 4	0 29	0 25	0 14	0 1	0 0	0 3	0 41	0 25	0 22	0 30	13 12	0 37	14 14	27 0	13 21	0 35
tig00000650	1588425	A	G	0 21	0 20	0 16	0 10	0 47	0 30	0 32	0 30	0 27	0 19	0 17	0 2	0 4	0 35	0 10	0 18	0 25	0 7	0 26	0 11	0 14	0 6	0 8	0 10	0 28	0 28	0 11	0 10	0 9	0 5	0 33	0 28	0 13	0 1	0 0	0 3	0 41	0 26	0 23	0 30	0 27	0 37	0 30	0 31	0 35	0 34
tig00000650	1588426	A	C	0 21	0 21	0 17	0 10	0 48	0 30	0 32	0 30	0 27	0 20	0 17	0 2	0 4	0 35	0 11	14 6	0 25	0 7	0 27	0 11	0 14	0 6	0 8	0 10	0 28	0 28	0 11	0 10	0 9	0 5	0 32	0 27	0 14	0 1	0 0	0 3	0 38	0 26	0 22	0 30	0 23	0 32	0 24	0 29	0 35	0 34
tig00000650	1588431	TA	CG	0 22	0 25	0 18	0 11	0 52	0 36	0 35	0 32	0 29	0 21	0 18	0 2	0 4	0 36	0 12	0 25	0 27	0 9	0 28	0 11	0 15	0 7	0 8	0 10	0 31	0 30	0 11	0 12	0 9	0 6	0 34	0 28	0 15	0 1	0 0	0 2	0 41	0 27	0 24	0 31	0 29	0 36	0 31	0 34	0 34	0 40
tig00000650	1588458	A	C	0 42	0 34	0 32	0 23	0 69	0 44	0 47	0 48	0 45	0 35	0 24	0 3	0 10	0 54	0 23	0 34	0 44	0 13	0 38	0 11	0 20	0 21	0 11	0 17	0 38	0 41	0 20	0 18	0 17	0 8	0 29	0 36	0 17	0 1	0 0	0 2	0 40	0 29	0 28	0 38	0 30	0 37	0 28	0 39	0 35	0 41
tig00000650	1588462	T	A	0 42	0 35	0 34	0 23	0 71	0 44	0 47	0 50	0 48	0 36	0 23	0 3	0 10	0 57	0 22	0 35	0 44	0 13	0 39	0 12	0 23	0 22	0 11	0 18	0 42	0 43	0 21	0 17	0 17	0 8	0 27	0 34	0 15	0 1	0 0	0 2	0 39	0 29	0 24	0 37	0 30	0 37	0 28	0 41	0 37	0 42
tig00000650	1588465	T	C	0 43	0 36	0 36	0 24	0 73	0 46	0 50	0 52	0 49	0 38	0 24	0 3	0 11	0 58	0 24	0 35	0 44	0 13	0 42	0 12	0 24	0 22	0 11	0 19	0 43	0 45	0 22	0 17	0 17	0 8	0 28	0 36	0 15	0 1	0 0	0 2	0 39	0 28	0 25	0 36	0 28	0 34	0 28	0 42	0 37	0 41
tig00000650	1588467	T	A	0 44	0 36	17 19	0 24	0 71	0 46	0 50	0 52	0 49	0 40	0 23	0 3	0 11	0 59	0 25	0 37	0 43	0 13	0 41	0 12	0 24	0 21	0 12	0 18	0 43	0 46	0 21	0 18	0 16	0 8	0 26	0 36	0 14	0 2	0 0	0 2	0 39	0 27	0 25	0 37	0 28	0 34	0 29	0 41	0 37	0 41
tig00000650	1588479	A	G	0 50	0 33	0 41	0 26	0 72	0 42	0 59	0 49	0 53	0 41	0 24	0 4	0 12	0 55	0 26	0 39	0 42	0 15	0 48	0 18	0 21	0 22	0 10	0 23	0 43	0 39	0 21	0 18	0 22	0 11	0 29	0 32	0 18	0 3	0 0	0 2	0 35	0 30	0 24	0 37	0 28	0 34	0 29	0 37	0 39	0 39
tig00000650	1588479	A	T	0 50	0 33	0 41	0 26	0 72	0 42	0 59	0 49	0 53	0 41	0 24	0 4	0 12	0 55	0 26	0 39	0 42	0 15	0 48	0 18	0 21	0 22	0 10	0 23	0 43	0 39	0 21	0 18	0 22	0 11	0 29	0 32	0 18	0 3	0 0	0 2	0 35	0 30	0 24	0 37	0 28	0 34	0 29	0 37	0 39	0 39
tig00000650	1588488	G	T	29 18	11 18	0 37	0 22	0 66	0 38	0 57	0 44	0 48	0 37	0 21	0 3	0 11	0 47	0 24	0 38	0 39	0 15	0 41	0 18	0 16	0 20	0 9	0 21	0 39	0 33	0 19	0 17	0 22	8 2	0 21	0 29	0 17	0 3	0 0	0 2	0 39	0 29	0 23	0 36	0 28	0 36	0 32	0 38	0 39	0 40
tig00000650	1588490	A	G	0 44	0 28	0 35	0 20	0 58	0 33	0 49	0 42	0 44	0 37	0 20	0 2	0 11	0 44	0 21	0 35	0 36	0 14	0 37	0 18	0 16	0 21	0 9	0 20	0 37	0 31	0 19	0 15	0 22	0 9	0 20	0 26	0 17	0 3	0 0	0 2	0 40	0 31	0 24	0 28	0 27	0 36	0 31	0 38	0 37	0 42
tig00000650	1588490	ACATG	GCATC	0 44	0 28	0 35	0 20	0 58	0 33	0 49	0 42	0 44	0 37	0 20	0 2	0 11	0 44	0 21	0 35	0 36	0 14	0 37	0 18	0 16	0 21	0 9	0 20	0 37	0 31	0 19	0 15	0 22	0 9	0 20	0 26	0 17	0 3	0 0	0 2	0 40	0 31	0 24	0 28	0 27	0 36	0 31	0 38	0 37	0 42
tig00000650	1588494	G	A	0 44	0 28	0 35	0 20	0 58	0 33	0 49	0 42	0 44	0 37	0 20	0 2	0 11	0 44	0 21	0 35	0 36	0 14	0 37	0 18	0 16	0 21	0 9	0 20	0 37	0 31	0 19	0 15	0 22	0 9	0 20	0 26	0 17	0 3	0 0	0 2	0 40	0 31	0 24	0 28	0 27	0 36	0 31	0 38	0 37	0 42
tig00000650	1588504	GAAA	AAAG	25 0	9 0	0 0	0 0	0 0	0 0	0 0	0 0	0 0	0 0	0 0	0 0	0 0	0 0	0 0	0 0	0 0	0 0	0 18	0 19	0 0	0 0	0 0	0 0	0 0	0 0	0 0	0 0	0 0	6 0	0 16	0 20	0 17	0 2	0 0	0 2	0 45	0 33	0 26	0 35	0 29	0 35	0 33	0 41	0 35	0 42
tig00000650	1588507	A	G	14 0	15 0	32 0	21 0	53 0	29 0	38 0	33 0	40 0	33 0	17 0	2 0	10 0	36 0	19 0	32 0	28 0	11 0	14 18	0 19	15 0	20 0	8 0	18 0	34 0	26 0	16 0	11 0	18 0	1 0	0 16	0 20	0 17	0 2	0 0	0 2	0 45	0 33	0 26	0 35	0 29	0 35	0 33	0 41	0 35	0 42
tig00000650	1588515	A	C	0 36	0 22	0 31	0 18	0 46	0 29	0 37	0 31	15 22	0 33	8 7	0 2	0 8	0 33	0 17	0 31	0 27	3 7	0 29	0 20	0 12	0 19	0 8	0 15	18 11	0 22	0 16	0 10	0 17	0 7	0 13	0 14	0 16	0 2	0 0	0 2	0 42	0 31	0 30	0 35	0 29	0 37	0 31	0 42	0 35	0 43
tig00000650	1588579	C	T	0 33	0 33	0 28	0 14	0 38	15 15	0 18	0 30	0 32	0 30	0 9	0 6	0 6	0 37	0 13	0 28	0 21	0 13	0 26	0 19	0 11	0 17	0 12	0 10	0 32	0 34	0 10	0 11	0 14	0 9	0 19	0 19	0 20	0 0	0 0	0 0	0 52	0 38	0 32	0 42	0 50	0 39	0 39	0 38	0 46	0 38
tig00000650	1588584	T	A	0 37	0 34	0 29	0 15	0 43	0 32	0 22	0 31	0 34	0 35	0 11	0 6	0 6	0 40	0 13	0 29	0 23	0 16	0 30	0 18	0 13	0 18	0 16	0 11	0 37	0 37	0 11	0 13	0 15	0 8	0 22	0 22	0 21	0 0	0 0	0 0	0 48	0 38	0 31	0 40	0 46	0 39	0 37	0 29	0 48	0 34
tig00000650	1588587	T	C	0 38	0 34	0 31	0 15	0 46	0 33	0 22	0 32	0 35	0 36	0 12	0 6	0 6	0 41	0 14	0 30	0 22	0 16	0 30	0 17	0 14	0 19	0 16	0 11	0 38	0 37	0 11	0 13	0 16	0 9	0 22	0 22	0 21	0 0	0 0	0 0	0 51	0 36	0 31	0 44	20 28	0 39	20 20	32 0	14 34	0 36
tig00000650	1588599	G	T	0 45	0 40	0 36	0 17	0 53	0 40	15 17	0 33	0 39	0 45	0 15	0 8	0 8	0 47	0 16	0 33	0 33	0 20	0 36	0 12	0 18	0 21	0 21	0 11	0 42	0 48	0 12	0 12	0 19	0 10	0 30	0 25	0 21	0 0	0 0	0 0	0 50	0 35	0 34	0 40	0 49	0 39	0 39	0 32	0 52	0 37
tig00000650	1588603	G	C	0 48	0 41	0 41	0 20	0 56	0 43	0 33	0 36	0 39	0 46	0 16	0 7	0 9	0 48	0 18	0 34	0 34	0 20	0 41	0 12	0 19	0 24	0 21	0 13	0 43	27 23	0 14	0 14	0 21	0 11	0 30	0 32	0 22	0 0	0 0	0 0	0 50	0 36	0 33	0 38	0 50	0 39	0 39	0 34	0 50	0 35
tig00000650	1588636	G	A	17 27	18 21	38 0	17 0	49 0	38 0	32 0	33 0	30 3	45 0	16 0	6 0	10 0	18 27	8 7	19 9	34 0	11 7	13 14	0 9	16 0	18 0	9 9	4 8	38 0	17 23	8 0	9 0	18 0	6 5	0 29	0 43	0 21	0 2	0 0	0 0	0 46	0 33	0 34	0 46	0 51	0 35	0 41	0 29	0 49	0 26
tig00000650	1588643	TACG	AACA	0 39	0 35	0 39	0 14	0 41	0 32	0 28	0 33	0 26	0 38	0 13	0 5	0 8	0 39	0 12	0 24	0 28	0 16	0 23	0 7	0 13	0 18	0 16	0 9	0 33	0 38	0 7	0 9	0 17	0 10	0 26	0 38	0 23	0 2	0 0	0 0	0 43	0 30	0 33	0 47	0 51	0 35	0 38	0 30	0 47	0 26
tig00000650	1588646	G	A	0 39	0 35	0 39	0 14	0 41	0 32	0 28	0 33	0 26	0 38	0 13	0 5	0 8	0 39	0 12	0 24	0 28	0 16	0 23	0 7	0 13	0 18	0 16	0 9	0 33	0 38	0 7	0 9	0 17	0 10	0 26	0 38	0 23	0 2	0 0	0 0	0 43	0 30	0 33	0 47	0 51	0 35	0 38	0 30	0 47	0 26
tig00000650	1588646	G	C	0 39	0 35	0 39	0 14	0 41	0 32	0 28	0 33	0 26	0 38	0 13	0 5	0 8	0 39	0 12	1 24	0 28	0 16	0 23	0 7	0 13	0 18	0 16	0 9	0 33	0 38	0 7	0 9	0 17	0 10	0 26	0 38	0 23	0 2	0 0	0 0	0 43	0 30	0 33	0 47	0 51	0 35	0 38	0 30	0 47	0 26
tig00000650	1588654	G	A	0 39	0 35	0 36	0 14	0 51	0 31	0 30	0 38	0 32	0 41	0 11	0 5	0 10	0 39	0 12	0 27	0 33	0 12	0 28	0 8	0 12	0 16	0 17	0 7	0 36	0 40	0 6	0 7	0 16	0 10	0 24	0 40	0 24	0 2	0 0	0 0	0 39	0 31	0 35	0 40	0 55	0 33	0 36	0 30	0 46	0 24
tig00000650	1588660	G	A	0 41	0 30	0 33	0 13	0 53	0 30	0 33	0 36	0 34	0 41	0 10	0 4	0 10	0 40	0 14	0 25	0 35	0 10	0 27	0 8	0 14	0 18	0 17	0 9	0 35	0 39	0 6	0 8	0 15	0 10	0 24	0 41	0 24	0 2	0 0	0 0	0 40	0 31	0 37	0 41	0 52	0 31	0 34	0 29	0 47	0 21
tig00000650	1588664	A	G	0 40	0 28	0 34	0 14	0 54	0 30	0 32	0 37	0 34	0 41	0 10	0 2	0 11	0 40	0 12	0 24	0 36	0 9	0 27	0 8	0 14	0 20	0 16	0 8	0 34	0 39	0 6	0 9	0 14	0 9	0 26	0 43	0 25	0 2	0 0	0 0	0 41	0 32	0 33	0 41	0 51	0 28	0 35	0 31	0 47	0 22
tig00000650	1588672	T	C	0 32	0 16	0 31	0 13	0 46	0 31	0 29	0 37	0 26	0 34	0 10	0 2	0 9	0 30	0 9	0 19	0 32	0 9	0 24	0 7	0 12	0 15	0 12	0 8	0 29	0 30	0 7	0 8	0 12	0 7	0 21	0 42	0 24	0 2	0 0	0 0	0 37	0 30	0 33	0 39	0 49	0 27	0 30	0 30	0 44	0 19
tig00000650	1588681	C	A	0 38	0 21	0 33	0 16	0 52	0 37	0 31	0 44	0 30	0 40	0 18	0 3	0 10	0 37	0 11	0 20	0 35	0 12	18 14	0 7	0 14	0 16	0 13	0 9	0 29	0 36	0 10	0 10	0 14	0 7	0 23	0 44	0 25	0 2	0 0	0 0	0 38	0 32	0 34	0 37	20 31	0 30	12 18	33 0	47 0	12 8
tig00000650	1588696	T	C	0 39	0 19	0 35	0 16	0 53	0 37	0 32	0 42	0 32	0 39	0 21	0 5	0 11	0 40	0 11	0 21	0 27	0 13	0 30	0 9	0 11	0 15	0 8	0 14	0 28	0 33	0 10	0 11	0 17	0 11	0 22	0 39	0 22	0 1	0 0	0 0	0 46	0 27	0 33	0 34	0 50	0 28	0 31	0 35	0 48	0 23
tig00000650	1588701	C	T	0 39	0 18	0 35	0 16	0 56	0 34	0 39	0 42	0 36	0 36	0 21	0 5	0 11	0 38	0 12	0 20	0 26	0 13	0 31	0 9	0 10	0 14	0 8	0 13	0 27	0 32	0 12	0 11	0 17	0 11	0 19	0 42	0 22	0 1	0 0	0 0	0 41	0 28	0 31	0 37	17 32	0 27	16 16	36 0	14 35	0 22
tig00000650	1588709	GAAT	AAAC	0 34	0 17	0 33	0 17	0 56	0 35	0 38	0 38	0 36	0 33	0 21	0 5	0 9	0 41	0 10	0 20	0 24	0 15	0 35	0 9	0 11	0 13	0 9	0 16	0 23	0 32	0 10	0 11	0 19	0 9	0 22	0 41	0 21	0 1	0 0	0 0	0 44	0 28	0 33	0 36	0 47	0 24	0 29	0 35	0 47	0 19
tig00000650	1588715	A	C	0 35	0 18	0 33	0 18	0 61	0 39	0 42	0 40	0 41	0 37	0 22	0 5	0 11	0 42	0 10	0 22	0 27	0 16	0 37	0 9	0 13	0 17	0 9	0 16	0 24	0 33	0 12	0 12	0 21	0 10	0 21	0 41	0 21	0 1	0 0	0 0	0 45	0 32	0 33	0 34	0 46	0 25	0 29	0 34	0 49	0 20
tig00000650	1588726	C	T	0 39	0 26	0 39	0 20	0 72	0 42	0 47	0 46	0 47	0 42	0 26	0 5	0 12	0 49	0 12	0 24	0 38	0 21	0 45	0 8	0 14	0 23	0 15	0 19	0 31	0 37	0 16	0 12	0 25	0 12	0 23	0 37	0 21	0 0	0 0	0 0	0 35	0 30	0 31	0 34	0 41	0 25	0 27	0 32	0 43	0 21
tig00000650	1588762	G	T	0 40	0 25	0 35	0 18	0 63	0 34	0 42	0 39	0 38	0 35	0 30	0 5	0 8	0 41	0 14	0 17	0 35	0 20	0 38	0 5	0 13	0 20	0 12	0 20	0 25	0 31	0 17	0 7	0 24	0 13	0 29	0 36	0 17	0 0	0 0	0 0	0 34	0 30	0 31	0 25	0 35	0 22	0 29	0 25	0 37	0 20
tig00000650	1588771	ACACG	GCACA	0 34	0 22	0 30	0 12	0 54	0 24	0 36	0 26	0 32	0 32	0 25	0 4	0 5	0 33	0 14	0 15	0 30	0 16	0 14	0 4	0 12	0 16	0 12	0 17	0 23	0 12	0 13	0 6	0 20	0 11	0 27	0 33	0 13	0 0	0 0	0 0	0 34	0 26	0 28	0 18	0 21	0 18	0 10	0 0	0 0	0 9
tig00000650	1588774	C	A	0 34	0 22	0 30	0 12	0 54	0 24	0 36	0 26	0 32	0 32	0 25	0 4	0 5	0 33	0 14	0 15	0 30	0 16	0 14	0 4	0 12	0 16	0 12	0 17	0 23	0 12	0 13	0 6	0 20	0 11	0 27	0 33	0 13	0 0	0 0	0 0	0 34	0 26	0 28	0 18	0 21	0 18	0 10	0 0	0 0	0 9
tig00000650	1588775	G	A	0 34	0 22	0 30	0 12	0 54	0 24	0 36	0 26	0 32	0 32	0 25	0 4	0 5	0 33	0 14	0 15	0 30	0 16	17 14	0 4	0 12	0 16	0 12	0 17	0 23	11 12	0 13	0 6	0 20	0 11	0 27	0 33	0 13	0 0	0 0	0 0	0 34	0 26	0 28	0 18	12 21	0 18	9 10	22 0	31 0	9 9
tig00000650	1588780	A	G	0 30	0 22	0 27	0 11	0 50	0 24	0 33	0 22	0 31	0 24	0 18	0 4	0 6	0 32	0 12	0 13	0 28	0 15	0 29	0 5	0 10	0 15	0 12	0 16	0 21	0 20	0 12	0 5	0 18	0 11	0 28	0 34	0 13	0 0	0 0	0 0	0 33	0 25	0 27	0 18	0 31	0 16	0 18	0 22	0 31	0 17
tig00000650	1588794	G	A	0 21	0 17	0 21	0 9	0 37	0 18	0 27	0 17	0 24	0 17	0 11	0 2	0 5	0 21	0 11	0 9	0 26	0 9	0 24	0 10	0 7	0 13	0 11	0 12	0 19	0 17	0 11	0 4	0 13	0 5	0 29	0 30	0 13	0 0	0 0	0 0	0 27	0 25	0 25	0 17	0 29	0 13	0 17	0 19	0 27	0 14
tig00000650	1588824	T	G	0 12	0 6	0 6	0 2	0 15	0 4	0 7	0 5	0 8	0 3	0 3	0 1	0 1	0 4	0 4	0 2	0 11	0 0	0 5	0 10	0 1	0 1	0 3	0 4	0 7	0 5	0 2	0 2	0 2	0 2	0 27	0 27	0 12	0 0	0 0	0 0	0 21	0 18	0 19	0 13	0 18	0 12	0 14	0 8	0 17	0 13
tig00000650	1588826	G	A	0 11	0 4	0 3	0 1	0 12	0 3	0 6	0 4	0 5	0 2	0 3	0 1	0 0	0 3	0 4	0 1	0 9	0 0	0 3	0 11	0 1	0 1	0 2	0 4	0 6	0 4	0 2	0 2	0 2	0 2	12 10	14 11	4 8	0 0	0 0	0 0	0 21	0 16	0 19	0 13	0 17	0 10	0 14	0 8	0 16	0 13
tig00000650	1588829	C	T	0 8	0 2	0 1	0 1	0 10	0 3	0 6	0 3	0 5	0 2	0 1	0 0	0 0	0 3	0 4	0 1	0 5	0 0	0 3	0 11	0 0	0 1	0 2	0 2	0 3	0 4	0 1	0 1	0 1	0 1	0 21	0 21	0 11	0 0	0 0	0 0	0 21	0 16	0 18	0 13	0 17	0 8	0 13	0 8	0 16	0 12
tig00000650	1588849	TTA	CTC	0 0	0 0	0 0	0 0	0 0	0 0	0 0	0 0	0 0	0 0	0 0	0 0	0 0	0 0	0 0	0 0	0 0	0 0	0 0	0 13	0 0	0 0	0 0	0 0	0 0	0 0	0 0	0 0	0 0	0 0	0 14	0 18	0 9	0 0	0 0	0 0	0 11	0 13	0 13	0 4	0 10	0 9	0 9	0 1	0 11	0 6
tig00000650	1588869	CA	TG	0 0	0 0	0 0	0 0	0 0	0 0	0 0	0 0	0 0	0 0	0 0	0 0	0 0	0 0	0 0	0 0	0 0	0 0	0 0	0 14	0 0	0 0	0 0	0 0	0 0	0 0	0 0	0 0	0 0	0 0	0 0	0 0	0 0	0 0	0 0	0 0	0 0	0 0	0 0	0 0	0 0	0 0	0 0	0 0	0 0	0 0
tig00000650	1588870	A	G	0 0	0 0	0 0	0 0	0 0	0 0	0 0	0 0	0 0	0 0	0 0	0 0	0 0	0 0	0 0	0 0	0 0	0 0	0 0	0 14	0 0	0 0	0 0	0 0	0 0	0 0	0 0	0 0	0 0	0 0	8 0	12 0	6 0	0 0	0 0	0 0	4 0	3 0	11 0	3 0	10 0	8 0	7 0	1 0	8 0	3 0
tig00000650	1588908	C	G	0 0	0 0	0 0	0 0	0 0	0 0	0 0	0 0	0 0	0 0	0 0	0 0	0 0	0 0	0 0	0 0	0 0	0 0	0 0	0 14	0 0	0 0	0 0	0 0	0 0	0 0	0 0	0 0	0 0	0 0	0 0	5 0	4 0	0 0	0 0	0 0	3 0	0 0	2 0	2 0	1 0	1 0	0 0	1 0	1 0	2 0
tig00000650	1588938	G	C	0 0	0 0	0 0	0 0	0 0	0 0	0 0	0 0	0 0	0 0	0 0	0 0	0 0	0 0	0 0	0 0	0 0	0 0	0 0	0 13	0 0	0 0	0 0	0 0	0 0	0 0	0 0	0 0	0 0	0 0	0 5	0 6	0 2	0 0	0 0	0 0	0 7	0 0	0 4	0 0	0 4	0 3	0 2	0 1	0 1	0 8
tig00000650	1588951	T	A	0 0	0 0	0 0	0 0	0 0	0 0	0 0	0 0	0 0	0 0	0 0	0 0	0 0	0 0	0 0	0 0	0 0	0 0	0 0	0 10	0 0	0 0	0 0	0 0	0 0	0 0	0 0	0 0	0 0	0 0	0 7	0 8	0 2	0 0	0 0	0 0	9 0	1 0	4 0	0 0	4 0	4 0	3 0	1 0	1 0	8 0
tig00000650	1588958	A	G	0 0	0 0	0 0	0 0	0 0	0 0	0 0	0 0	0 0	0 0	0 0	0 0	0 0	0 0	0 0	0 0	0 0	0 0	0 0	0 10	0 0	0 0	0 0	0 0	0 0	0 0	0 0	0 0	0 0	0 0	3 0	0 7	0 2	0 0	0 0	0 0	8 0	2 0	5 0	1 0	8 0	5 0	3 0	0 0	1 0	5 0
tig00000650	1588958	AAG	GAA	0 0	0 0	0 0	1 0	1 0	0 0	0 0	0 0	0 0	1 0	0 0	0 0	0 0	1 0	1 0	0 0	0 0	0 0	0 0	0 10	0 0	0 0	0 0	0 0	0 0	0 0	0 0	0 0	1 0	0 0	4 0	1 7	0 2	0 0	0 0	0 0	0 0	0 0	0 0	0 0	0 0	0 0	0 0	0 0	0 0	0 0
tig00000650	1588958	AAG	GGA	0 0	0 0	0 0	0 0	0 0	0 0	0 0	0 0	0 0	0 0	0 0	0 0	0 0	0 0	0 0	0 0	0 0	0 0	0 0	0 10	0 0	0 0	0 0	0 0	0 0	0 0	0 0	0 0	0 0	0 0	0 0	0 7	0 2	0 0	0 0	0 0	0 0	0 0	0 0	0 0	0 0	0 0	0 0	0 0	0 0	0 0
tig00000650	1588967	T	C	10 0	3 0	3 0	6 0	12 0	5 0	3 0	12 0	5 0	9 0	3 0	1 0	3 0	3 0	2 0	1 0	6 0	3 0	1 5	0 10	0 0	1 0	3 0	2 0	8 0	7 0	0 0	0 0	3 0	4 0	0 12	0 13	0 4	0 0	0 0	0 0	0 9	0 3	0 9	0 2	0 10	0 5	0 5	0 1	0 1	0 9
tig00000650	1588968	A	T	0 14	0 7	0 3	0 6	0 13	0 5	0 3	0 12	0 7	0 10	0 4	0 1	0 4	0 4	0 4	0 4	0 7	0 3	0 6	0 9	0 0	0 1	0 3	0 2	0 8	0 7	0 0	0 0	0 3	0 5	0 12	0 14	0 4	0 0	0 0	0 0	0 9	0 3	0 10	0 2	0 10	0 5	0 5	0 1	0 1	0 9
tig00000650	1589001	CCAGT	TCAAC	0 0	0 0	0 0	0 0	0 0	0 0	0 0	0 0	0 0	0 0	0 0	0 0	0 0	0 0	0 0	0 0	0 0	0 0	0 5	0 6	0 0	0 0	0 0	0 0	0 0	0 0	0 0	0 0	0 0	0 0	0 25	0 26	0 4	0 0	0 0	0 0	0 14	0 8	0 14	0 3	0 13	0 10	0 9	0 4	0 3	0 10
tig00000650	1589005	T	C	14 0	15 0	12 0	14 0	33 0	17 0	19 0	22 0	16 0	24 0	2 0	2 0	4 0	13 0	7 0	12 0	16 0	7 0	6 5	0 6	6 0	7 0	5 0	4 0	11 0	16 0	2 0	4 0	7 0	4 0	0 25	0 26	0 4	0 0	0 0	0 0	0 14	0 8	0 14	0 3	0 13	0 10	0 9	0 4	0 3	0 10
tig00000650	1589014	C	A	0 39	0 27	0 18	0 29	0 55	0 30	0 37	0 46	0 32	0 39	0 11	0 4	0 10	0 27	0 13	0 24	0 34	0 14	0 16	0 6	0 9	0 11	0 9	0 8	0 29	0 30	0 5	0 5	0 12	0 12	0 24	0 26	0 4	0 0	0 0	0 0	0 16	0 10	0 16	0 4	0 13	0 10	0 10	0 4	0 3	0 10
tig00000650	1589025	C	A	0 49	0 31	0 20	0 31	0 57	0 35	0 41	0 51	0 40	0 46	0 13	0 4	0 12	0 35	0 14	0 28	0 43	0 14	0 18	0 6	0 10	0 14	0 12	0 11	0 37	0 38	0 7	0 7	0 14	0 14	0 21	0 29	0 4	0 0	0 0	0 0	0 17	0 11	0 17	0 5	0 14	0 17	0 12	5 0	5 4	0 12
tig00000650	1589055	A	T	0 57	0 39	0 28	0 42	0 79	0 49	0 50	0 72	0 56	0 59	0 15	0 7	0 14	0 48	0 14	0 35	0 63	0 22	0 20	0 2	0 11	0 20	0 14	0 16	0 49	0 49	0 14	0 11	0 25	0 16	0 18	0 30	0 7	0 0	0 0	0 0	0 23	0 14	0 17	0 7	0 19	0 27	0 17	0 9	0 9	0 14
tig00000650	1589066	T	C	0 54	0 35	0 27	0 38	0 71	0 49	0 51	0 63	0 54	0 52	0 12	0 6	0 11	0 55	0 14	0 35	0 62	0 21	0 15	0 3	0 13	0 23	0 16	0 17	0 46	0 49	0 16	0 11	0 28	0 14	0 10	0 28	0 8	0 0	0 0	0 0	0 23	0 16	0 18	0 8	0 18	0 27	0 17	0 8	0 8	0 14
tig00000650	1589071	A	G	0 48	0 36	0 27	0 39	0 73	0 49	0 49	0 61	0 52	0 53	0 12	0 6	0 10	0 51	0 13	0 31	0 60	0 21	0 14	0 3	0 13	0 22	0 15	0 15	0 44	0 50	0 16	0 11	0 26	0 12	6 0	8 21	3 5	0 0	0 0	0 0	0 19	0 16	0 18	7 2	2 14	0 28	2 17	9 0	8 0	2 12
tig00000650	1589076	T	C	0 43	0 35	0 26	0 35	0 66	0 49	0 46	0 61	0 52	0 47	0 11	0 6	1 9	0 51	0 13	0 31	0 59	0 20	0 13	0 3	0 9	0 21	0 15	0 15	0 42	0 50	0 15	0 10	0 25	0 12	0 7	0 27	0 9	0 0	0 0	0 0	0 22	0 17	0 16	0 9	0 15	0 28	0 20	0 9	0 8	0 15
tig00000650	1589077	A	C	0 44	0 34	0 26	0 34	0 65	0 49	0 46	0 60	0 51	0 44	0 11	0 6	0 10	0 51	0 11	0 31	0 59	0 20	0 12	0 3	0 9	0 21	0 15	0 15	0 40	0 49	0 15	0 10	0 26	0 10	0 8	22 5	5 4	0 0	0 0	0 0	0 21	0 17	0 16	0 9	0 15	0 30	0 17	0 9	0 8	0 15
tig00000650	1589085	G	A	29 0	22 0	19 0	25 0	46 0	33 0	31 0	44 0	32 0	29 0	10 0	5 0	9 0	33 0	6 0	24 0	47 0	9 0	8 0	0 3	6 0	13 0	10 0	13 0	30 0	30 0	10 0	7 0	17 0	7 0	3 0	4 21	4 5	0 0	0 0	0 0	0 21	0 17	0 17	0 9	0 16	0 33	0 24	0 9	0 8	0 12
tig00000650	1589088	A	G	0 0	0 0	0 0	0 0	0 0	0 0	0 0	0 0	0 0	0 0	0 0	0 0	0 0	0 0	0 0	0 0	0 0	0 0	0 0	0 3	0 0	0 0	0 0	0 0	0 0	0 0	0 0	0 0	0 0	0 0	7 0	0 21	0 5	0 0	0 0	0 0	0 21	0 17	0 17	0 9	0 16	0 33	0 24	0 9	0 8	0 12
tig00000650	1589095	ATT	A	0 31	0 19	0 16	0 21	0 40	0 27	0 26	0 41	0 33	0 31	0 7	0 5	0 4	0 37	0 6	0 18	0 47	0 12	0 7	0 4	0 5	0 15	0 11	0 11	0 32	0 36	0 14	0 7	0 20	0 5	0 11	21 5	0 8	0 0	0 0	0 0	0 19	0 16	0 21	0 8	0 13	0 32	0 24	0 8	0 11	0 14
tig00000650	1589115	A	G	0 37	0 31	0 23	0 23	0 50	0 37	0 28	0 43	0 40	0 44	0 5	0 5	0 6	0 54	0 6	0 25	0 52	0 14	0 12	0 4	0 6	0 15	0 11	0 17	0 34	0 38	0 16	0 8	0 22	0 7	0 23	0 36	0 10	0 0	0 0	0 0	0 21	0 17	0 18	0 11	0 12	0 34	0 24	0 13	0 15	0 13
tig00000650	1589128	A	G	0 39	0 33	0 28	0 25	0 56	0 35	0 26	0 45	0 40	0 47	0 4	0 4	0 3	0 54	0 6	0 28	0 47	0 15	0 20	0 5	0 7	0 15	0 11	0 13	0 32	0 43	0 16	0 10	0 22	0 7	0 27	0 43	0 10	0 0	0 0	0 0	0 22	0 17	0 19	0 10	0 12	0 39	0 24	0 11	0 14	0 15
tig00000650	1589133	C	T	0 42	0 33	0 28	0 24	0 59	0 36	0 27	0 44	0 39	0 44	0 4	0 4	0 3	0 54	0 6	0 26	0 45	0 13	0 22	0 5	0 6	0 14	0 11	0 15	0 36	0 42	0 15	0 10	0 23	0 7	0 30	0 50	0 10	0 0	0 0	0 0	0 20	0 17	0 21	0 10	0 14	0 36	0 26	0 11	0 12	0 16
tig00000650	1589161	GATGT	TATGC	0 50	0 34	0 29	0 19	0 46	0 40	0 34	0 45	0 40	0 48	0 6	0 6	0 4	0 53	0 11	0 26	0 49	0 12	0 29	0 6	0 11	0 13	0 12	0 17	0 44	0 36	0 13	0 12	0 15	0 9	0 41	0 47	0 10	0 0	0 0	0 0	0 18	0 14	0 17	0 8	0 17	0 37	0 25	0 14	0 16	0 23
tig00000650	1589197	T	A	0 61	0 47	0 35	0 28	0 63	0 45	0 47	0 47	0 51	0 63	0 8	0 6	0 5	0 64	0 16	0 40	0 51	0 12	0 34	0 6	0 12	0 17	0 16	0 18	0 46	0 39	0 16	0 17	0 20	0 12	0 34	0 34	0 11	0 0	0 0	0 0	0 22	0 15	0 19	0 10	0 15	0 27	0 20	0 12	0 15	0 24
tig00000650	1589202	C	T	0 57	0 46	0 33	0 23	0 60	0 41	0 44	0 46	0 50	0 57	0 7	0 6	0 4	0 58	0 16	0 39	0 47	0 10	0 32	0 7	0 11	0 17	0 16	0 16	0 45	0 40	0 13	0 16	0 20	0 12	0 30	0 30	0 11	0 0	0 0	0 0	0 21	0 16	0 18	0 10	0 15	0 26	0 18	0 12	0 15	0 24
tig00000650	1589215	T	C	0 50	0 34	0 30	0 20	0 50	0 34	0 39	0 38	0 40	0 46	0 7	0 5	0 3	0 45	0 15	0 31	0 37	0 9	0 28	0 7	0 11	0 16	0 14	0 15	0 41	0 31	0 10	0 15	0 17	0 11	0 23	0 21	0 10	0 0	0 0	0 0	0 21	0 16	0 18	0 8	0 14	0 23	0 18	0 9	0 15	0 23
tig00000650	1589219	G	A	0 47	0 31	0 26	0 19	0 49	0 31	0 39	0 37	0 35	0 43	0 6	0 4	0 3	0 41	0 14	0 27	0 35	0 9	0 22	0 7	0 10	0 16	0 14	0 15	0 39	0 27	0 10	0 12	0 16	0 11	0 10	0 20	0 11	0 0	0 0	0 0	0 21	0 17	0 17	0 8	0 14	0 22	0 18	0 9	0 15	0 21
tig00000650	1589219	G	C	0 47	0 31	0 26	0 19	0 49	0 31	0 39	0 37	0 35	0 43	0 6	0 4	0 3	0 41	0 14	0 27	0 35	0 9	0 22	0 7	0 10	0 16	0 14	0 15	0 39	0 27	0 10	0 12	0 16	0 11	10 10	0 20	0 11	0 0	0 0	0 0	0 21	0 17	0 17	0 8	0 14	0 22	0 18	0 9	0 15	0 21
tig00000650	1589230	T	C	0 37	0 28	0 22	0 14	0 37	0 24	0 33	0 31	0 29	0 37	0 6	0 4	0 3	0 35	0 14	0 21	0 27	0 8	0 18	0 7	0 10	0 11	0 13	0 14	0 31	0 20	0 8	0 11	0 15	0 9	0 12	0 9	0 11	0 0	0 0	0 0	0 18	0 15	0 17	0 6	0 12	0 23	0 10	0 9	0 15	0 19
tig00000650	1589260	C	A	0 12	0 17	0 12	0 8	0 26	0 10	0 19	0 8	0 14	0 22	0 2	0 1	0 3	0 16	0 7	0 13	0 10	0 3	0 7	0 7	0 2	0 6	0 5	0 6	0 7	0 10	0 3	0 5	0 6	0 3	0 4	0 1	5 6	0 0	0 0	0 0	0 17	0 14	0 14	0 8	0 11	0 22	0 6	0 5	0 9	0 18
tig00000650	1589262	T	A	0 12	0 16	0 11	0 8	0 25	0 8	0 17	0 7	0 11	0 19	0 2	0 1	0 1	0 14	0 6	0 12	0 9	0 2	0 6	0 6	0 3	0 6	0 5	0 6	0 7	0 10	0 3	0 5	0 6	0 3	0 3	0 1	0 10	0 0	0 0	0 0	0 16	0 14	0 14	0 7	0 11	0 24	0 6	0 5	0 8	0 18
tig00000650	1589338	G	A	0 0	0 0	0 0	0 0	0 0	0 0	0 0	0 0	0 0	0 0	0 0	0 0	0 0	0 0	0 0	0 0	0 0	0 0	0 0	0 3	0 0	0 0	0 0	0 0	0 0	0 0	0 0	0 0	0 0	0 0	2 0	1 0	10 0	0 0	0 0	0 0	5 0	6 0	1 0	2 0	1 0	11 0	0 0	0 0	1 0	1 0
tig00000650	1589360	T	A	0 0	0 0	0 0	0 0	0 0	0 0	0 0	0 0	0 0	0 0	0 0	0 0	0 0	0 0	0 0	0 0	0 0	0 0	0 0	0 3	0 0	0 0	0 0	0 0	0 0	0 0	0 0	0 0	0 0	0 0	0 3	0 10	0 8	0 0	0 0	0 0	0 3	0 6	0 0	0 1	0 1	0 10	0 0	0 0	0 0	0 1
tig00000650	1589362	G	A	0 0	0 0	0 0	0 0	0 0	0 0	0 0	0 0	0 0	0 0	0 0	0 0	0 0	0 0	0 0	0 0	0 0	0 0	0 0	0 2	0 0	0 0	0 0	0 0	0 0	0 0	0 0	0 0	0 0	0 0	0 5	0 10	0 9	0 0	0 0	0 0	3 0	3 0	0 0	1 0	1 0	9 0	0 0	0 0	0 0	1 0
tig00000650	1589390	C	G	0 0	0 1	0 6	0 7	0 5	0 3	0 3	0 6	0 10	0 9	0 2	0 0	0 0	0 3	0 1	0 2	0 6	0 1	0 0	0 3	0 1	0 1	0 1	0 1	0 4	0 1	0 2	0 2	0 3	0 0	0 7	0 12	0 10	0 0	0 0	0 0	0 4	0 2	0 0	0 1	0 0	0 2	0 0	0 0	0 0	0 0
tig00000650	1589423	A	C	0 10	0 7	0 18	0 12	0 28	0 21	0 17	0 20	0 26	0 37	0 5	0 0	0 3	0 7	0 3	0 6	0 28	0 6	0 7	0 3	0 5	0 8	0 3	0 6	0 22	0 9	0 4	0 6	0 5	0 2	0 9	0 19	0 13	0 0	0 0	0 0	0 3	0 1	0 0	0 0	0 0	0 0	0 0	0 0	0 0	0 0
tig00000650	1589440	C	A	14 0	9 0	21 0	16 0	39 0	32 0	22 0	26 0	38 0	42 0	6 0	2 0	5 0	9 0	5 0	12 0	38 0	7 0	14 0	0 5	5 0	12 0	5 0	6 0	35 0	12 0	7 0	7 0	7 0	2 0	0 7	0 19	0 12	0 0	0 0	0 0	0 3	0 1	0 0	0 0	0 0	0 0	0 0	0 0	0 0	0 0
tig00000650	1589460	C	T	0 23	0 12	0 31	0 18	0 53	0 39	0 31	0 43	0 46	0 53	0 9	0 3	0 8	0 16	0 9	0 14	0 49	0 10	0 17	0 5	0 7	0 18	0 7	0 8	0 45	0 15	0 8	0 15	0 11	0 5	0 5	0 17	0 12	0 0	0 0	0 0	0 2	0 1	0 0	0 0	0 0	0 0	0 0	0 0	0 0	0 0
tig00000650	1589476	G	A	0 26	0 19	0 47	0 21	0 66	0 51	0 39	0 54	0 51	0 57	0 16	0 5	0 10	1 20	0 11	2 16	0 61	0 12	0 20	0 7	0 11	0 18	0 11	0 9	0 62	0 16	0 11	0 17	0 13	0 8	7 0	0 25	0 12	0 0	0 0	0 0	2 0	0 0	0 0	1 0	0 0	0 0	0 0	0 0	0 0	0 0
tig00000650	1589489	A	C	0 33	0 20	0 49	0 19	0 65	0 59	0 46	0 56	0 53	0 61	0 17	0 7	0 13	0 26	0 17	0 20	0 62	0 13	0 22	0 8	0 12	0 21	0 16	0 12	0 62	0 22	0 14	0 18	0 15	0 9	0 14	0 26	0 12	0 0	0 0	0 0	0 2	0 0	0 0	0 1	0 0	0 1	0 1	0 0	0 0	0 0
tig00000650	1589497	A	T	0 38	0 23	0 47	0 22	0 63	0 59	0 44	0 57	0 53	0 59	0 17	0 7	0 12	0 30	0 21	0 22	0 60	0 11	0 23	0 7	0 11	0 22	0 19	0 13	0 64	0 27	0 14	0 20	0 17	0 11	0 16	0 29	0 12	0 0	0 0	0 0	0 2	0 0	0 0	0 1	0 0	0 1	0 1	0 0	0 0	0 0
tig00000650	1589499	C	T	0 38	0 25	0 47	0 25	0 62	0 60	0 44	0 58	0 53	0 61	0 17	0 7	0 12	0 30	0 21	0 22	0 58	0 12	0 24	0 7	0 11	0 23	0 19	0 12	0 63	0 28	0 15	0 22	0 17	0 10	0 18	0 28	0 13	0 0	0 0	0 0	0 2	0 0	0 0	0 1	0 0	0 1	0 1	0 0	0 0	0 0
tig00000650	1589520	A	G	0 45	0 25	0 52	0 28	0 65	0 51	0 45	0 66	0 54	0 52	0 19	0 8	0 11	0 33	0 21	0 28	0 61	0 11	0 20	0 8	0 10	0 24	0 21	0 17	0 54	0 31	0 18	0 23	0 20	0 11	0 33	0 36	0 14	0 0	0 0	0 0	0 1	0 0	0 0	0 1	0 0	0 1	0 1	0 0	0 0	0 0
tig00000650	1589541	G	A	0 46	0 28	0 54	0 31	0 61	0 42	0 45	0 65	0 46	0 53	0 23	0 8	0 18	0 42	0 27	0 34	0 54	0 10	0 15	0 9	0 13	0 20	0 24	0 24	0 51	0 30	0 19	0 24	0 24	0 12	0 37	0 43	0 13	0 0	0 0	0 0	0 1	0 0	0 2	0 1	0 2	0 1	0 1	0 0	0 0	0 0
tig00000650	1589565	A	G	0 39	0 23	0 38	0 29	0 45	0 32	0 33	0 43	0 37	0 42	0 13	0 6	0 15	0 32	0 24	0 31	0 41	0 5	0 12	0 8	0 12	0 13	0 20	0 19	0 37	0 27	0 17	0 15	0 20	0 8	0 40	0 39	0 12	0 0	0 0	0 0	2 0	4 0	2 0	4 0	6 0	2 0	1 0	0 0	2 0	2 0
tig00000650	1589574	A	G	21 16	7 8	30 0	26 0	37 0	27 0	31 0	37 0	34 1	39 0	11 0	5 0	15 0	14 16	14 8	12 18	34 0	2 3	11 0	0 7	8 0	13 0	11 8	6 12	31 0	13 13	16 0	15 0	18 0	4 2	0 36	0 41	0 10	0 0	0 0	0 0	0 4	0 4	0 3	0 5	0 8	0 2	0 1	0 0	0 2	0 2
tig00000650	1589576	TTAAAAAT	ATAGAAAC	0 33	0 14	0 25	0 23	0 34	0 18	0 24	0 30	0 25	0 30	0 8	0 4	0 13	0 26	0 18	0 28	0 27	0 3	0 10	0 7	0 8	0 10	0 13	0 17	0 25	0 22	0 14	0 13	0 17	0 6	0 30	0 37	0 10	0 0	0 0	0 0	0 4	0 4	0 3	0 5	0 8	0 2	0 1	0 0	0 2	0 2
tig00000650	1589607	G	A	0 19	0 8	0 14	0 10	0 18	0 8	0 9	0 12	0 13	0 13	0 7	0 2	0 10	0 12	0 9	0 19	0 12	0 1	0 5	0 7	0 5	0 5	0 7	0 9	0 16	0 8	0 6	0 5	0 9	0 2	0 19	0 24	0 10	0 0	0 0	0 0	0 9	0 4	0 7	0 9	0 10	0 2	0 3	0 2	0 4	0 5
tig00000650	1589616	AGAG	TGAA	0 8	0 5	0 7	0 6	0 10	0 4	0 6	0 6	0 7	0 8	0 5	0 2	0 7	0 11	0 9	0 11	0 7	0 0	0 3	0 8	0 3	0 1	0 4	0 6	0 12	0 4	0 4	0 2	0 8	0 1	0 12	0 19	0 11	0 0	0 0	0 0	0 10	0 6	0 7	0 10	0 10	0 5	0 3	0 2	0 5	0 6
tig00000650	1589618	A	T	0 8	0 5	0 7	0 6	0 10	0 4	0 6	0 6	0 7	0 8	0 5	0 2	0 7	0 11	0 9	0 11	0 7	0 0	0 3	0 8	0 3	0 1	0 4	0 6	0 12	0 4	0 4	0 2	0 8	0 1	0 12	0 19	0 11	0 0	0 0	0 0	0 10	0 6	0 7	0 10	0 10	0 5	0 3	0 2	0 5	0 6
tig00000650	1589638	A	G	1 0	0 0	1 0	2 0	0 0	0 0	0 0	0 0	1 0	0 0	0 0	0 0	0 0	0 0	0 0	1 0	0 0	0 0	0 0	0 10	0 0	0 0	0 0	0 0	0 0	0 0	1 0	0 0	0 0	0 0	15 0	18 0	10 0	0 0	0 0	0 0	18 0	14 0	9 0	11 0	10 0	6 0	2 0	2 0	6 0	9 0
tig00000650	1589650	A	G	0 0	0 0	0 0	0 0	0 0	0 0	0 0	0 0	0 0	0 0	0 0	0 0	0 0	0 0	0 0	0 0	0 0	0 0	0 0	0 9	0 0	0 0	0 0	0 0	0 0	0 0	0 0	0 0	0 0	0 0	0 12	0 17	0 9	0 0	0 0	0 0	0 21	0 14	0 11	0 11	0 10	0 9	0 2	0 6	0 11	0 11
tig00000650	1589670	T	C	0 0	0 0	0 0	0 0	0 0	0 0	0 0	0 0	0 0	0 0	0 0	0 0	0 0	0 0	0 0	0 0	0 0	0 0	0 0	0 7	0 0	0 0	0 0	0 0	0 0	0 0	0 0	0 0	0 0	0 0	0 9	0 17	0 8	0 0	0 0	0 0	26 0	19 0	20 0	8 6	4 7	15 0	1 1	0 6	0 16	14 8
tig00000650	1589685	A	C	0 0	0 0	0 0	0 0	0 0	0 0	0 0	0 0	0 0	0 0	0 0	0 0	0 0	0 0	0 0	0 0	0 0	0 0	0 0	0 7	0 0	0 0	0 0	0 0	0 0	0 0	0 0	0 0	0 0	0 0	0 7	0 13	0 8	0 0	0 0	0 0	0 33	0 21	0 20	0 17	0 17	0 15	0 5	0 8	0 19	0 26
tig00000650	1589729	G	A	0 0	0 0	0 0	0 0	0 0	0 0	0 0	0 0	0 0	0 0	0 0	0 0	0 0	0 0	0 0	0 0	0 0	0 0	0 0	0 12	0 0	0 0	0 0	0 0	0 0	0 0	0 0	0 0	0 0	0 0	0 9	0 12	0 7	0 0	0 0	0 0	0 39	0 25	0 23	13 12	0 17	0 19	0 7	0 15	0 25	0 28
tig00000650	1589736	A	G	0 0	0 0	0 0	0 0	0 0	0 0	0 0	0 0	0 0	0 0	0 0	0 0	0 0	0 0	0 0	0 0	0 0	0 0	0 0	0 9	0 0	0 0	0 0	0 0	0 0	0 0	0 0	0 0	0 0	0 0	0 10	0 9	0 6	0 0	0 0	0 0	42 0	27 0	23 0	12 11	9 8	19 0	3 4	0 15	0 26	19 11
tig00000650	1589740	T	C	0 0	0 0	0 0	0 0	0 0	0 0	0 0	0 0	0 0	0 0	0 0	0 0	0 0	0 0	0 0	0 0	0 0	0 0	0 0	0 8	0 0	0 0	0 0	0 0	0 0	0 0	0 0	0 0	0 0	0 0	1 9	0 9	0 7	0 0	0 0	0 0	0 43	0 30	0 23	0 23	0 18	0 21	0 8	0 16	0 26	0 29
tig00000650	1589741	CAATCCAACTACCTCTTCAAACCTGCTCGGCAT	C	0 0	0 0	0 0	0 0	0 0	0 0	0 0	0 0	0 0	0 0	0 0	0 0	0 0	0 0	0 0	0 0	0 0	0 0	0 0	0 6	0 0	0 0	0 0	0 0	0 0	0 0	0 0	0 0	0 0	0 0	0 8	0 4	0 5	0 0	0 0	0 0	0 37	0 23	0 18	0 20	0 16	0 18	0 5	0 16	0 24	0 25
tig00000650	1589748	ACTACCTCTTCAAACCTGCTCGG	GCTACCTCTTTAAACCTTCTCAT	0 0	0 0	0 0	0 0	0 0	0 0	0 0	0 0	0 0	0 0	0 0	0 0	0 0	0 0	0 0	0 0	0 0	0 0	0 0	0 6	0 0	0 0	0 0	0 0	0 0	0 0	0 0	0 0	0 0	0 0	0 8	0 4	0 5	0 0	0 0	0 0	0 37	0 23	0 18	0 20	0 16	0 18	0 5	0 16	0 24	0 25
tig00000650	1589780	A	G	0 0	0 0	0 0	0 0	0 0	0 0	0 0	0 0	0 0	0 0	0 0	0 0	0 0	0 0	0 0	0 0	0 0	0 0	0 4	0 9	0 0	0 0	0 0	0 0	0 0	0 0	0 0	0 0	0 0	0 0	0 9	0 6	0 4	0 0	0 0	0 0	0 47	0 38	0 28	0 27	0 25	0 29	0 12	0 24	0 30	0 39
tig00000650	1589820	G	T	0 0	0 0	0 0	0 0	0 0	0 0	0 0	0 0	0 0	0 0	0 0	0 0	0 0	0 0	0 0	0 0	0 0	0 0	0 10	0 9	0 0	0 0	0 0	0 0	0 0	0 0	0 0	0 0	0 0	0 0	0 10	0 12	0 4	0 0	0 0	0 0	0 51	0 38	0 33	0 29	0 32	0 25	0 18	0 34	0 31	0 40
tig00000650	1589839	G	T	0 0	0 0	0 0	0 0	0 0	0 0	0 0	0 0	0 0	0 0	0 0	0 0	0 0	0 0	0 0	0 0	0 0	0 0	0 18	0 8	0 0	0 0	0 0	0 0	0 0	0 0	0 0	0 0	0 0	0 0	0 11	0 18	0 5	0 0	0 0	0 0	0 50	0 40	0 38	0 29	0 34	0 28	0 16	0 31	0 37	0 39
tig00000650	1589879	A	T	0 0	0 0	0 0	0 0	0 0	0 0	0 0	0 0	0 0	0 0	0 0	0 0	0 0	0 0	0 0	0 0	0 0	0 0	23 0	0 5	0 1	0 0	0 0	0 0	0 0	0 0	0 0	0 0	0 0	0 0	0 19	0 19	0 6	0 0	0 0	0 0	0 53	0 52	0 45	0 24	0 34	0 31	0 23	0 31	0 36	0 42
tig00000650	1589908	C	T	0 0	0 0	0 0	0 0	0 0	0 0	0 0	0 0	0 0	0 0	0 0	0 0	0 0	0 0	0 0	0 0	0 0	0 0	0 17	0 8	0 1	0 0	0 0	0 0	0 0	0 0	0 0	0 0	0 0	0 0	20 3	0 24	0 7	0 0	0 0	0 1	0 44	0 48	0 48	0 26	0 35	0 31	0 23	0 35	0 40	0 45
tig00000650	1589911	AAA	TAG	0 0	0 0	0 0	0 0	0 0	0 0	0 0	0 0	0 0	0 0	0 0	0 0	0 0	0 0	0 0	0 0	0 0	0 0	0 17	0 8	0 1	0 0	0 0	0 0	0 0	0 0	0 0	0 0	0 0	0 0	0 24	0 27	0 7	0 0	0 0	0 1	0 41	0 47	0 50	0 25	0 35	0 32	0 21	0 31	0 42	0 45
tig00000650	1589935	C	T	0 7	0 6	0 7	0 6	0 11	0 5	0 10	0 5	0 8	0 12	0 5	0 1	0 2	0 12	0 3	0 5	0 15	0 4	0 22	0 7	0 4	0 2	0 1	0 3	0 6	0 8	0 7	0 0	0 3	0 5	20 3	0 35	0 10	0 0	0 1	0 2	0 38	0 40	0 43	0 29	0 32	0 27	0 21	0 29	0 45	0 39
tig00000650	1589938	TGCC	T	0 10	0 8	0 8	0 6	0 14	0 5	0 11	0 5	0 8	0 13	0 5	0 1	0 2	0 13	0 4	0 6	0 16	0 5	0 21	0 7	0 5	0 2	0 1	0 4	0 7	0 9	0 7	0 2	0 3	0 5	0 23	0 34	0 10	0 0	0 1	0 2	0 34	0 42	0 39	0 29	0 28	0 29	0 21	0 29	0 46	0 41
tig00000650	1589957	T	C	0 19	0 14	0 15	0 10	0 36	0 13	0 16	0 10	0 14	0 25	0 5	0 3	0 3	0 25	0 6	0 12	0 23	0 12	0 24	0 10	0 7	0 7	0 6	0 9	0 12	0 14	0 10	0 4	0 6	0 9	0 25	0 38	0 10	0 1	0 1	0 2	0 34	0 45	0 33	0 29	0 33	0 32	0 23	0 29	0 48	0 39
tig00000650	1589963	T	A	0 20	0 19	0 18	0 11	0 37	0 15	0 17	0 14	0 17	0 27	0 5	0 5	0 3	0 26	0 7	0 14	0 24	0 15	0 24	0 10	0 8	0 8	0 6	0 10	0 13	0 16	0 11	0 4	0 7	0 10	0 24	0 38	0 10	0 1	0 1	0 2	0 33	0 43	0 36	0 30	0 34	0 32	0 22	0 27	0 46	0 38
tig00000650	1589977	G	A	0 26	0 27	0 23	0 12	0 42	0 19	0 20	0 25	0 20	0 32	0 9	0 5	0 6	0 37	0 10	0 17	0 36	0 17	0 25	0 10	0 8	0 8	0 13	0 13	0 18	0 20	0 15	0 6	0 10	0 11	0 26	0 41	0 10	0 1	0 1	0 2	0 30	0 42	0 36	0 28	0 40	0 29	0 28	0 24	0 48	0 41
tig00000650	1589979	T	C	0 26	0 30	0 25	0 13	0 44	0 26	0 21	0 29	0 23	0 33	0 9	0 5	0 6	0 37	0 10	0 17	0 37	0 17	0 26	0 10	0 9	0 9	0 13	0 13	0 19	0 20	0 16	0 6	0 10	0 11	0 26	0 41	0 10	0 1	0 1	0 2	0 32	0 42	0 36	0 26	0 40	0 30	0 27	0 23	0 45	0 41
tig00000650	1589983	T	C	0 27	0 30	0 24	0 14	0 48	0 27	0 25	0 30	0 23	0 34	0 10	0 5	0 6	0 37	0 11	0 18	0 38	0 17	0 27	0 9	0 10	0 9	0 14	0 13	0 21	0 21	0 17	0 7	0 10	0 11	0 26	0 42	0 9	0 1	0 1	0 2	0 32	0 44	0 37	17 10	0 37	0 29	0 29	0 24	0 43	0 38
tig00000650	1589984	A	G	0 28	0 31	0 26	0 16	0 49	0 26	0 25	0 32	0 25	0 34	0 10	0 6	0 6	0 38	0 11	0 18	0 38	0 17	0 27	0 9	0 10	0 9	0 14	0 13	0 21	0 21	0 18	0 7	0 10	0 11	0 27	0 41	0 10	0 1	0 1	0 2	0 34	0 44	0 37	0 29	0 37	0 29	0 30	0 24	0 44	0 39
tig00000650	1590001	AT	A	0 39	0 38	0 31	0 16	0 64	0 33	0 35	0 39	0 32	0 45	0 15	0 8	0 6	0 48	0 13	0 23	0 46	0 19	0 32	0 9	0 12	0 10	0 16	0 13	0 26	0 29	0 20	0 10	0 13	0 12	0 29	0 41	0 10	0 1	0 1	0 3	0 44	0 48	0 44	0 30	0 39	0 31	0 32	0 22	0 44	0 37
tig00000650	1590004	A	T	0 39	0 38	0 31	0 16	0 64	0 33	0 35	0 39	0 32	0 45	0 15	0 8	0 6	0 48	0 13	0 23	0 46	0 19	0 32	0 9	0 12	0 10	0 16	0 13	0 26	0 29	0 20	0 10	0 13	0 12	0 29	0 41	0 10	0 1	0 1	0 3	0 44	0 48	0 44	0 30	0 39	0 31	0 32	0 22	0 44	0 37
tig00000650	1590006	A	C	0 43	0 39	0 32	0 16	0 66	0 36	0 35	0 42	0 34	0 49	0 17	0 8	0 8	0 52	0 15	0 25	0 47	0 20	0 37	0 9	0 12	0 10	0 17	0 14	0 28	0 32	0 20	0 11	0 14	0 12	0 31	0 45	0 11	0 1	0 1	0 3	0 42	0 42	0 45	0 30	0 39	0 31	0 32	0 23	0 45	0 36
tig00000650	1590012	TC	CA	0 47	0 40	0 34	0 17	0 66	0 38	0 38	0 44	0 37	0 50	0 19	0 7	0 8	0 59	0 15	0 29	0 48	0 20	0 40	0 8	0 12	0 11	0 18	0 16	0 29	0 34	0 21	0 11	0 15	0 13	0 30	0 43	0 12	0 1	0 1	0 3	0 46	0 37	0 45	0 29	0 35	0 33	0 31	0 24	0 40	0 35
tig00000650	1590013	C	A	0 47	0 40	0 34	0 17	0 66	0 38	0 38	0 44	0 37	0 50	0 19	0 7	0 8	0 59	0 15	0 29	0 48	0 20	0 40	0 8	0 12	0 11	0 18	0 16	0 29	0 34	0 21	0 11	0 15	0 13	0 30	0 43	0 12	0 1	0 1	0 3	0 46	0 37	0 45	0 29	0 35	0 33	0 31	0 24	0 40	0 35
tig00000650	1590013	CA	AC	0 47	0 40	0 34	0 17	0 66	0 38	0 38	0 44	0 37	0 50	0 19	0 7	0 8	0 59	0 15	0 29	0 48	0 20	0 40	0 8	0 12	0 11	0 18	0 16	0 29	0 34	0 21	0 11	0 15	0 13	0 30	0 43	0 12	0 1	0 1	0 3	0 46	0 37	0 45	0 29	0 35	0 33	0 31	0 24	0 40	0 35
tig00000650	1590023	C	T	0 49	0 45	0 37	0 18	0 70	0 42	0 39	0 48	0 39	0 55	0 20	0 12	0 7	0 59	0 16	0 31	0 53	0 21	0 39	0 7	0 14	0 10	0 19	0 16	0 27	0 34	0 18	0 12	0 18	0 13	0 33	0 34	0 11	0 1	0 0	0 3	0 45	0 38	0 41	0 28	0 36	0 35	0 29	0 20	0 43	0 39
tig00000650	1590031	T	C	0 50	0 48	0 36	0 17	0 68	0 42	0 37	0 51	0 39	0 54	0 18	0 12	0 7	0 58	0 15	0 29	0 50	0 21	0 34	0 7	0 14	0 11	0 18	0 15	0 32	0 30	0 18	0 12	0 17	0 11	0 31	0 36	0 11	0 1	0 1	0 3	0 48	0 35	0 40	0 34	0 37	0 36	0 28	0 19	0 46	0 40
tig00000650	1590032	G	A	0 50	0 48	0 37	0 16	0 68	0 41	0 37	0 53	0 40	0 53	0 19	0 12	0 7	0 58	0 15	0 29	0 50	0 18	0 34	0 6	0 13	0 11	0 17	0 14	0 31	0 33	0 18	0 12	0 18	0 10	0 31	0 35	0 11	0 1	0 1	0 3	0 47	0 36	0 39	0 33	0 37	0 36	0 26	0 20	0 45	0 39
tig00000650	1590036	T	C	0 44	0 44	0 38	0 14	0 67	21 21	0 39	0 53	0 41	0 48	0 18	0 12	0 8	0 57	0 15	0 28	0 47	0 17	0 30	0 8	0 12	0 9	0 16	0 14	0 32	0 30	1 15	0 12	0 17	0 15	0 30	0 31	0 12	0 1	0 1	0 3	0 50	0 35	0 36	0 32	0 37	0 36	0 27	0 20	0 44	0 38
tig00000650	1590041	C	T	0 50	0 47	0 37	0 15	0 68	0 42	0 41	0 55	0 46	0 45	0 19	0 12	0 9	0 58	0 16	0 29	0 45	0 15	0 34	0 9	0 11	0 10	0 17	0 15	0 35	0 32	0 20	0 10	0 17	0 16	0 31	0 35	0 12	0 1	0 1	0 3	50 0	35 0	36 0	30 0	18 22	38 0	10 19	0 19	0 46	29 13
tig00000650	1590043	GA	AG	0 49	0 45	0 35	0 14	0 67	0 44	0 40	0 54	0 45	0 43	0 19	0 12	0 10	0 58	0 16	0 29	0 49	0 15	0 33	0 8	0 11	0 9	0 19	0 15	0 35	0 32	0 20	0 10	0 17	0 16	0 32	0 34	0 12	0 1	0 1	0 3	0 50	0 33	0 35	0 30	0 40	0 35	0 30	0 17	0 46	0 39
tig00000650	1590045	G	C	0 49	0 46	0 36	0 14	0 69	0 45	0 41	0 53	0 46	0 46	0 19	0 12	0 11	0 58	0 17	0 29	0 50	0 13	0 34	0 8	0 12	0 11	0 19	0 15	0 34	0 31	0 20	0 10	0 17	0 16	0 32	0 35	0 12	0 1	0 1	0 3	0 51	0 33	0 34	0 30	0 39	0 34	0 28	0 16	0 44	0 39
tig00000650	1590051	C	A	0 45	0 44	0 36	0 14	0 62	0 48	0 44	0 57	0 46	0 50	0 22	0 13	0 11	0 55	0 15	0 30	0 50	0 11	0 33	0 9	0 14	0 11	0 18	0 12	0 33	0 31	0 22	0 10	0 16	0 16	0 33	0 35	0 11	0 1	0 1	0 3	0 49	0 30	0 32	0 30	0 34	0 31	0 26	1 14	0 39	0 34
tig00000650	1590051	C	G	0 45	0 44	0 36	0 14	0 62	0 48	0 44	0 57	0 46	0 50	0 22	0 13	0 11	0 55	0 15	0 30	0 50	0 11	0 33	0 9	0 14	0 11	0 18	0 12	0 33	0 31	0 22	0 10	0 16	0 16	0 33	0 35	0 11	0 1	0 1	0 3	0 49	0 30	0 32	0 30	0 34	0 31	0 26	0 14	0 39	0 34
tig00000650	1590055	C	T	0 45	0 44	0 36	0 14	0 63	0 46	0 47	0 55	0 45	0 49	0 22	0 12	0 10	0 55	0 18	0 29	0 50	0 12	0 32	0 9	0 14	0 12	0 19	0 12	0 33	0 33	0 21	0 12	0 17	0 14	0 32	0 35	0 13	0 0	1 0	3 0	0 49	0 31	0 35	0 30	0 34	0 31	0 24	12 4	0 41	0 34
tig00000650	1590060	C	CT	0 19	0 13	0 0	0 0	0 0	0 0	0 0	0 0	0 0	0 0	0 0	0 0	0 0	0 19	0 8	0 12	0 0	0 4	11 0	0 7	0 0	0 0	0 6	0 4	0 0	0 9	0 0	0 0	0 0	0 8	6 15	0 25	0 13	0 0	0 1	0 3	0 46	0 32	0 32	0 27	0 31	0 33	0 27	0 15	13 21	7 23
tig00000650	1590069	C	T	19 19	17 13	29 0	9 0	54 0	37 0	38 0	39 0	40 0	36 0	17 0	8 0	7 0	23 19	4 8	10 12	37 0	5 4	13 0	0 7	10 0	11 0	6 6	3 4	25 0	15 9	15 0	9 0	9 0	4 8	0 15	0 25	0 13	0 0	0 1	0 3	0 46	0 32	0 32	0 27	0 31	0 33	0 27	0 15	0 21	0 23
tig00000650	1590080	CG	GT	0 53	0 32	0 38	0 11	0 68	0 42	0 48	0 38	0 47	0 53	0 25	0 9	0 12	0 51	0 17	0 31	0 45	0 14	0 37	0 5	0 11	0 13	0 16	0 13	0 31	0 39	0 15	0 10	0 15	0 14	0 24	0 28	0 14	0 1	0 1	0 3	0 49	0 33	0 40	0 28	0 36	0 34	0 27	0 14	0 40	0 37
tig00000650	1590081	G	T	0 53	0 32	0 38	0 11	0 68	0 42	0 48	0 38	0 47	0 53	0 25	0 9	0 12	0 51	0 17	0 31	0 45	0 14	0 37	0 5	0 11	0 13	0 16	0 13	0 31	0 39	0 15	0 10	0 15	0 14	0 24	0 28	0 14	0 1	0 1	0 3	0 49	0 33	0 40	0 28	0 36	0 34	0 27	0 14	0 40	0 37
tig00000650	1590092	C	A	0 48	0 29	0 39	0 12	0 63	0 45	0 45	0 40	0 47	0 52	0 25	0 9	0 15	0 46	0 18	0 34	0 44	0 20	0 36	0 7	0 13	0 13	0 18	0 17	0 32	0 37	0 20	0 9	0 12	0 15	0 16	0 22	0 13	0 1	0 1	0 3	0 53	0 33	0 39	0 24	0 36	0 30	0 29	0 11	0 34	0 30
tig00000650	1590097	A	C	18 0	13 0	19 0	6 0	27 0	21 0	22 0	19 0	20 0	21 0	7 0	5 0	7 0	25 0	10 0	16 0	21 0	5 0	5 20	0 7	5 0	8 0	7 0	5 0	16 0	16 0	10 0	4 0	5 0	9 0	0 18	0 19	0 14	0 1	0 1	0 3	0 50	0 35	0 39	0 26	0 33	0 28	0 28	0 9	0 36	0 35
tig00000650	1590097	ATCG	CTCT	0 0	0 0	0 0	0 0	0 0	0 0	0 0	0 0	0 0	0 0	0 0	0 0	0 0	0 0	0 0	0 0	0 0	0 0	0 20	0 7	0 0	0 0	0 0	0 0	0 0	0 0	0 0	0 0	0 0	0 0	0 18	0 19	0 14	0 1	0 1	0 3	0 50	0 35	0 39	0 26	0 33	0 28	0 28	0 9	0 36	0 35
tig00000650	1590106	T	G	0 44	0 30	0 44	0 13	0 66	0 45	0 41	0 35	0 41	0 53	0 23	0 7	0 15	0 49	0 20	0 38	0 47	0 25	0 34	0 7	0 10	0 12	0 16	0 17	0 35	0 36	0 19	0 9	0 13	0 18	0 20	0 22	0 13	0 1	0 1	0 3	0 52	0 36	0 42	0 28	0 32	0 28	0 31	0 10	0 35	0 36
tig00000650	1590111	C	A	18 22	13 17	0 43	0 12	0 63	0 43	0 37	0 33	0 37	0 51	0 22	0 7	0 16	0 47	0 20	0 34	0 43	0 25	0 31	0 8	0 9	0 12	0 17	0 16	0 34	0 34	0 18	0 9	0 11	6 10	0 19	0 21	0 13	0 1	0 1	0 3	0 52	0 35	0 40	0 31	0 31	0 28	1 28	0 11	0 35	0 38
tig00000650	1590113	T	C	0 39	0 30	0 43	0 12	0 64	0 43	0 37	0 31	0 37	0 49	0 22	0 6	0 16	0 44	0 19	0 33	0 41	0 22	0 31	0 8	0 9	0 12	0 16	0 16	0 34	0 33	0 18	0 9	0 10	0 16	0 18	0 21	0 13	0 1	0 1	0 3	0 51	0 36	0 39	0 31	0 33	0 28	0 30	0 12	0 31	0 37
tig00000650	1590126	T	G	0 31	0 22	0 35	0 11	0 53	0 39	0 30	0 23	0 30	0 42	0 19	0 3	0 14	0 37	0 17	0 31	0 31	0 21	0 28	0 8	0 7	0 12	0 14	0 13	0 26	0 29	0 16	0 8	0 9	0 13	0 17	0 21	0 12	0 1	0 0	0 3	0 51	0 35	0 40	0 33	0 31	0 27	0 27	0 16	0 33	0 35
tig00000650	1590126	TCCCT	GCCCC	0 31	0 22	0 35	0 11	0 53	0 39	0 30	0 23	0 30	0 42	0 19	0 3	0 14	0 37	0 17	0 31	0 31	0 21	0 28	0 8	0 7	0 12	0 14	0 13	0 26	0 29	0 16	0 8	0 9	0 13	0 17	0 21	0 12	0 1	0 0	0 3	0 51	0 35	0 40	0 33	0 31	0 27	0 27	0 16	0 33	0 35
tig00000650	1590133	G	A	29 0	22 0	32 0	9 0	51 0	35 0	23 0	20 0	29 0	39 0	18 0	3 0	14 0	35 0	16 0	28 0	31 0	21 0	7 18	0 9	7 0	11 0	13 0	13 0	25 0	13 15	15 0	8 0	8 0	10 0	0 19	0 19	0 10	0 1	0 0	0 3	0 51	0 33	0 39	0 32	0 31	0 28	0 25	0 18	0 34	0 35
tig00000650	1590159	C	T	0 19	0 14	0 23	0 7	0 37	0 17	0 15	0 14	0 17	0 30	0 14	0 2	0 7	0 24	0 9	0 21	0 22	0 16	0 23	0 8	0 6	0 5	0 9	0 11	0 18	0 17	0 9	0 5	0 8	0 7	0 21	0 19	0 10	0 1	0 0	0 3	0 40	0 33	0 31	0 30	0 30	0 31	0 28	0 18	0 45	0 41
tig00000650	1590165	C	G	0 15	0 13	0 20	0 7	0 33	0 16	0 13	0 12	0 15	0 27	0 13	0 2	0 7	0 22	0 9	0 20	0 19	0 14	0 21	0 6	0 5	0 3	0 8	0 7	0 17	0 15	0 8	0 5	0 7	0 7	0 23	0 18	0 10	0 1	0 0	0 0	0 44	0 35	0 33	18 12	0 30	0 33	0 32	0 19	0 40	0 41
tig00000650	1590188	G	T	0 8	0 5	0 10	0 1	0 15	0 10	0 6	0 6	0 3	0 8	0 4	0 1	0 3	0 11	0 6	0 10	0 8	0 8	0 15	0 8	0 2	0 1	0 1	0 2	0 9	0 7	0 2	0 3	0 3	0 3	0 18	0 17	0 11	0 0	0 0	0 3	0 41	0 36	0 37	0 27	25 16	0 31	18 11	23 0	24 20	0 46
tig00000650	1590210	G	A	0 0	0 0	0 0	0 0	0 0	0 0	0 0	0 0	0 0	0 0	0 0	0 0	0 0	0 0	0 0	0 0	0 0	0 0	0 12	0 8	0 0	0 0	0 0	0 0	0 0	0 0	0 0	0 0	0 0	0 0	0 19	18 3	6 2	0 0	0 0	0 2	0 47	0 38	0 38	0 31	0 42	0 31	0 28	0 21	0 46	0 45
tig00000650	1590256	C	T	0 0	0 0	0 0	0 0	0 0	0 0	0 0	0 0	0 0	0 0	0 0	0 0	0 0	0 0	0 0	0 0	0 0	0 0	0 17	0 7	0 0	0 0	0 0	0 0	0 0	0 0	0 0	0 0	0 0	0 0	0 16	0 15	0 6	0 0	0 0	0 1	0 45	0 36	0 34	0 32	0 37	0 40	0 25	0 24	0 57	0 36
tig00000650	1590262	C	A	0 0	0 0	0 0	0 0	0 0	0 0	0 0	0 0	0 0	0 0	0 0	0 0	0 0	0 0	0 0	0 0	0 0	0 0	0 16	0 7	0 0	0 0	0 0	0 0	0 0	0 0	0 0	0 0	0 0	0 0	0 17	0 16	0 6	0 0	0 0	0 0	0 46	0 35	0 34	0 29	0 35	0 40	0 27	0 25	0 55	0 33
tig00000650	1590272	A	C	0 0	0 0	0 0	0 0	0 0	0 0	0 0	0 0	0 0	0 0	0 0	0 0	0 0	0 0	0 0	0 0	0 0	0 0	0 17	0 7	0 0	0 0	0 0	0 0	0 0	0 0	0 0	0 0	0 0	0 0	0 20	0 19	0 6	0 0	0 0	0 0	48 0	35 0	32 0	29 0	13 22	40 0	12 11	0 19	0 50	26 10
tig00000650	1590284	T	C	0 0	0 0	0 0	0 0	0 0	0 0	0 0	0 0	0 0	0 0	0 0	0 0	0 0	0 0	0 0	0 0	0 0	0 0	0 16	0 6	0 0	0 0	0 0	0 0	0 0	0 0	0 0	0 0	0 0	0 0	0 24	0 15	1 5	0 0	0 0	0 0	0 44	0 36	0 36	0 34	0 37	0 51	0 24	0 17	0 52	0 41
tig00000650	1590308	T	C	0 0	0 0	0 1	0 0	0 1	0 0	0 0	0 0	0 0	0 0	0 0	0 0	0 0	0 1	0 0	0 0	0 0	0 1	15 0	0 6	0 0	0 0	0 0	0 0	0 0	0 0	0 0	0 0	0 0	0 0	0 24	0 16	0 4	0 0	0 0	0 0	0 43	0 39	0 44	0 39	0 35	0 48	0 22	0 19	28 23	11 32
tig00000650	1590313	TA	AG	0 0	0 0	0 1	0 0	0 1	0 0	0 0	0 0	0 0	0 0	0 0	0 0	0 0	0 1	0 0	0 0	0 0	0 1	0 15	0 6	0 0	0 0	0 0	0 0	0 0	0 0	0 0	0 0	0 0	0 0	0 24	0 20	0 4	0 0	0 0	0 0	0 41	0 41	0 44	0 38	0 39	0 45	0 19	0 20	0 50	0 50
tig00000650	1590314	A	C	0 0	0 0	0 1	0 0	0 1	0 0	0 0	0 0	0 0	0 0	0 0	0 0	0 0	0 1	0 0	0 0	0 0	0 1	0 15	0 6	0 0	0 0	0 0	0 0	0 0	0 0	0 0	0 0	0 0	0 0	0 24	0 20	0 4	0 0	0 0	0 0	0 41	0 41	0 44	0 38	0 39	0 45	0 19	0 20	0 50	0 50
tig00000650	1590415	G	A	0 0	0 0	0 0	0 0	0 0	0 0	0 0	0 0	0 0	0 0	0 0	0 0	0 0	0 0	0 0	0 0	0 0	0 0	0 9	0 6	0 0	0 0	0 0	0 0	0 0	0 0	0 0	0 0	0 0	0 0	0 21	0 31	0 4	0 0	0 0	0 0	0 27	0 27	0 33	0 30	0 29	0 34	0 13	0 19	0 47	0 44
tig00000650	1590418	A	G	0 0	0 0	0 0	0 0	0 0	0 0	0 0	0 0	0 0	0 0	0 0	0 0	0 0	0 0	0 0	0 0	0 0	0 0	0 9	0 6	0 0	0 0	0 0	0 0	0 0	0 0	0 0	0 0	0 0	0 0	0 20	0 31	0 4	0 0	0 0	0 0	25 0	27 0	34 0	18 12	13 15	22 15	4 10	0 18	0 45	30 11
tig00000650	1590432	A	T	0 0	0 0	0 0	0 0	0 0	0 0	0 0	0 0	0 0	0 0	0 0	0 0	0 0	0 0	0 0	0 0	0 0	0 0	0 7	0 5	0 0	0 0	0 0	0 0	0 0	0 0	0 0	0 0	0 0	0 0	0 17	0 27	0 4	0 0	0 0	0 0	0 25	0 25	0 32	0 27	0 25	0 41	0 12	0 18	0 44	0 35
tig00000650	1590441	A	T	0 0	0 0	0 0	0 0	0 0	0 0	0 0	0 0	0 0	0 0	0 0	0 0	0 0	0 0	0 0	0 0	0 0	0 0	0 5	0 6	0 0	0 0	0 0	0 0	0 0	0 0	0 0	0 0	0 0	0 0	6 11	0 29	0 3	0 0	0 0	0 0	0 25	0 25	0 32	0 24	0 22	0 36	0 12	0 16	0 39	0 30
tig00000650	1590455	C	A	0 0	0 0	0 0	0 0	0 0	0 0	0 1	0 0	0 0	0 0	0 0	0 0	0 0	0 0	0 0	0 0	0 0	0 0	0 2	0 6	0 0	0 0	0 0	0 0	0 0	0 0	0 0	0 0	0 0	0 0	0 10	0 21	0 3	0 0	0 0	0 0	0 20	0 21	0 23	10 10	0 23	0 32	0 13	0 12	0 33	0 26
tig00000650	1590466	T	C	0 0	0 0	0 0	0 0	0 0	0 0	0 2	0 0	0 0	0 0	0 0	0 0	0 0	0 0	0 0	0 0	0 0	0 0	0 0	0 5	0 0	0 0	0 0	0 0	0 0	0 0	0 0	0 0	0 0	0 0	0 8	0 19	0 2	0 0	0 0	0 0	0 22	0 16	0 20	0 21	0 16	0 33	0 14	0 10	0 35	0 24
tig00000650	1590470	G	A	0 0	0 0	0 0	0 0	0 0	0 0	0 2	0 0	0 0	0 0	0 0	0 0	0 0	0 0	0 0	0 0	0 0	0 0	0 0	0 5	0 0	0 0	0 0	0 0	0 0	0 0	0 0	0 0	0 0	0 0	0 6	0 18	0 2	0 0	0 0	0 0	0 24	0 17	0 19	0 20	0 16	0 34	0 12	0 10	0 37	0 23
tig00000650	1590499	GA	G	0 0	0 0	0 0	0 0	0 0	0 0	0 0	0 0	0 0	0 0	0 0	0 0	0 0	0 0	0 0	0 0	0 0	0 0	0 0	0 6	0 0	0 0	0 0	0 0	0 0	0 0	0 0	0 0	0 0	0 0	7 0	1 17	0 2	0 0	0 0	0 0	21 0	17 0	19 0	14 0	12 0	32 0	8 0	8 0	22 0	19 0
tig00000650	1590501	A	T	0 0	0 0	0 0	0 0	7 0	0 0	7 0	0 0	0 0	6 0	0 0	1 0	2 0	0 0	0 0	6 0	0 0	0 0	0 0	0 6	0 0	0 0	0 0	0 0	0 0	0 0	0 0	0 0	0 0	0 0	0 0	0 17	0 2	0 0	0 0	0 0	0 0	0 0	0 0	0 0	1 0	0 0	0 0	0 0	0 0	0 0
tig00000650	1590511	A	G	0 3	0 5	0 4	0 7	0 15	0 4	0 18	0 3	0 3	0 16	0 2	0 1	0 5	0 8	0 3	0 9	0 10	0 2	0 5	0 6	0 1	0 4	0 2	0 0	0 7	0 3	0 2	0 0	0 1	0 2	5 6	1 22	0 2	0 0	0 0	0 0	0 21	0 20	0 24	0 17	0 13	0 30	0 12	0 7	0 25	0 24
tig00000650	1590519	C	A	0 9	0 9	0 8	0 9	0 20	0 8	0 23	0 8	0 4	0 21	0 6	0 1	0 6	0 16	0 5	0 10	0 14	0 3	0 9	0 6	0 4	0 4	0 3	0 1	0 7	0 4	0 2	0 0	0 2	0 2	8 9	7 21	0 2	0 0	0 0	0 1	0 20	0 23	0 23	0 15	0 11	0 32	0 14	0 5	0 22	0 27
tig00000650	1590524	T	G	0 11	0 10	0 11	0 11	0 25	0 11	0 26	0 11	0 7	0 22	0 7	0 2	0 6	0 17	0 6	0 11	0 17	0 4	0 11	0 7	0 4	0 4	0 3	0 2	0 8	0 4	0 2	0 0	0 2	0 4	0 17	0 27	0 2	0 0	0 0	0 1	0 21	0 24	0 26	0 16	0 11	0 32	0 14	0 5	0 22	0 32
tig00000650	1590527	A	G	0 11	0 14	0 12	0 11	0 27	0 13	0 28	0 14	0 9	0 23	0 9	0 3	0 7	0 17	0 6	0 14	0 22	0 4	0 12	0 7	0 4	0 4	0 3	0 4	0 10	0 6	0 2	0 0	0 3	0 4	0 18	0 29	0 2	0 0	0 0	0 1	22 0	23 0	25 0	7 9	4 6	31 0	5 9	0 5	0 24	18 15
tig00000650	1590531	C	T	0 12	0 15	0 14	0 13	0 27	0 15	0 29	0 13	0 12	0 26	0 10	0 4	0 7	0 22	0 6	0 15	0 24	0 4	0 14	0 6	0 4	0 4	0 3	0 3	0 13	0 7	0 2	0 0	0 3	0 4	0 18	0 26	0 2	0 0	0 0	0 1	0 21	0 24	0 28	0 16	0 9	0 33	0 14	0 5	0 27	0 33
tig00000650	1590537	T	C	0 14	0 17	0 20	0 15	0 29	0 17	0 35	0 16	0 14	0 27	0 11	0 5	0 8	0 23	0 7	0 18	0 25	0 5	0 14	0 6	0 5	0 5	0 5	0 6	0 15	0 9	0 2	0 1	0 6	0 4	0 24	1 28	0 3	0 0	0 0	0 1	0 23	0 23	0 29	0 14	0 14	0 32	0 12	0 10	0 23	0 31
tig00000650	1590550	TCCAGGATCAAC	T	0 24	0 22	0 24	0 17	0 32	0 23	0 39	0 24	0 19	0 32	0 13	0 5	0 10	0 27	0 12	0 22	0 30	0 6	0 21	0 4	0 7	0 5	0 6	0 8	0 20	0 15	0 4	0 5	0 9	0 5	0 31	0 30	0 2	0 0	0 0	0 1	0 25	0 25	0 28	0 13	0 15	0 38	0 12	0 11	0 23	0 30
tig00000650	1590571	A	G	0 33	0 33	0 34	0 27	0 43	0 28	0 45	0 32	0 25	0 43	0 21	0 5	0 13	0 35	0 17	0 33	0 41	0 11	0 31	0 4	0 10	0 7	0 9	0 10	0 35	0 23	0 7	0 11	0 18	0 9	0 35	0 34	0 2	0 0	0 0	1 0	0 30	0 27	0 32	0 13	0 17	0 36	0 17	0 12	0 29	0 36
tig00000650	1590592	T	C	0 33	0 31	0 34	0 26	0 39	0 26	0 36	0 31	0 25	0 38	0 21	0 4	0 12	0 35	0 17	0 30	0 41	0 11	0 31	0 7	0 9	0 7	0 9	0 10	0 35	0 23	0 6	0 11	0 18	0 9	0 37	0 35	0 4	0 0	0 0	0 1	26 0	26 0	25 0	8 5	6 6	23 0	6 9	0 13	0 27	18 11
tig00000650	1590603	G	A	0 30	0 28	0 32	0 22	0 31	0 25	0 30	0 27	0 24	0 36	0 18	0 4	0 10	0 31	0 17	0 25	0 37	0 10	0 29	0 9	0 8	0 7	0 9	0 9	0 34	0 23	0 6	0 11	0 17	0 9	0 34	0 30	0 3	0 0	0 0	0 1	0 24	0 24	0 22	0 14	0 12	0 22	0 14	0 13	0 26	0 32
tig00000650	1590634	C	AACAATACA	0 20	0 12	0 17	0 14	0 16	0 11	0 15	0 15	0 12	0 16	0 10	0 0	0 5	0 13	0 10	0 16	0 16	0 6	0 16	0 9	0 5	0 2	0 4	0 5	0 21	0 15	0 5	0 10	0 12	0 5	0 22	0 22	0 3	0 0	0 0	0 1	0 19	0 22	0 24	0 16	0 19	0 22	0 15	0 15	0 23	0 31
tig00000650	1590658	T	C	0 6	0 3	0 5	0 5	0 6	0 1	0 1	0 3	0 2	0 7	0 3	0 0	0 1	0 6	0 3	0 6	0 8	0 2	4 2	0 9	0 0	0 1	0 1	0 2	0 13	0 5	0 3	0 3	0 8	0 2	0 26	0 19	0 3	0 0	0 0	0 1	22 0	20 0	22 0	24 0	21 0	21 0	15 0	18 0	24 0	29 0
tig00000650	1590674	T	C	0 0	0 0	0 0	0 0	0 0	0 0	0 0	0 0	0 0	0 0	0 0	0 0	0 0	0 0	0 0	0 0	0 0	0 0	0 0	0 8	0 0	0 0	0 0	0 0	0 0	0 0	0 0	0 0	0 0	0 0	0 23	11 4	0 2	0 0	0 0	0 1	0 21	0 18	0 23	0 25	0 21	0 20	0 15	0 19	0 27	0 21
tig00000650	1590697	T	C	0 1	0 0	0 0	0 0	0 1	0 0	0 0	0 0	0 0	0 0	0 0	0 0	0 0	0 0	0 0	0 0	0 0	0 0	0 0	0 12	0 0	0 0	0 0	0 0	0 0	0 0	0 0	0 0	0 0	0 0	0 20	0 13	0 3	0 1	0 0	0 1	0 21	0 13	0 20	0 31	0 21	0 14	0 16	0 11	0 23	0 21
tig00000650	1590707	G	A	1 0	0 0	2 0	0 0	3 0	0 0	1 0	1 0	2 0	0 0	0 0	0 0	0 0	1 0	0 0	0 0	2 0	0 0	1 0	0 11	0 0	1 0	0 0	1 0	1 0	0 0	1 0	2 0	1 0	0 0	19 0	3 13	0 3	1 0	0 0	1 0	16 0	15 0	16 0	33 0	14 0	12 0	4 2	0 0	9 0	20 0
tig00000650	1590707	GGGGT	AGGGC	0 0	0 0	0 0	0 0	0 0	0 0	0 0	0 0	0 0	0 0	0 0	0 0	0 0	0 0	0 0	0 0	0 0	0 0	0 0	0 11	0 0	0 0	0 0	0 0	0 0	0 0	0 0	0 0	0 0	0 0	0 0	0 13	0 3	0 0	0 0	0 0	0 0	0 0	0 0	0 0	8 0	0 0	12 2	12 0	9 0	0 0
tig00000650	1590715	T	C	0 7	0 2	0 9	0 2	0 9	0 3	0 5	0 6	0 8	0 2	0 2	0 1	0 2	0 6	0 1	0 0	0 10	0 2	0 4	0 10	0 1	0 1	0 2	0 1	0 7	0 3	0 2	0 5	0 2	0 1	2 18	3 13	0 3	0 1	0 1	0 1	0 21	0 20	0 19	0 36	0 20	0 11	0 16	0 13	0 17	0 18
tig00000650	1590739	A	T	0 18	0 13	0 18	0 8	0 23	0 11	0 15	0 16	0 23	0 12	0 11	0 1	0 5	0 13	0 3	0 8	0 21	0 6	0 12	0 8	0 8	0 7	0 4	0 4	0 17	0 12	0 3	0 7	0 5	0 9	0 21	0 23	0 5	0 1	0 2	0 1	0 25	0 24	0 22	0 36	0 26	0 19	0 12	0 16	0 22	0 22
tig00000650	1590746	G	T	0 20	0 17	0 20	0 12	0 27	0 15	0 17	0 21	0 25	0 21	0 11	0 1	0 9	0 16	0 4	0 12	0 24	1 7	0 14	0 8	0 8	0 8	0 4	0 5	0 19	0 12	0 5	0 8	0 5	0 10	0 22	0 28	0 5	0 2	0 2	0 1	0 28	0 26	0 25	0 35	0 26	0 19	0 13	0 16	0 26	0 22
tig00000650	1590790	T	C	0 24	0 20	0 19	0 15	0 28	0 16	0 21	0 22	0 28	0 23	0 11	0 1	0 9	0 21	0 6	0 15	0 27	0 11	0 13	0 6	0 8	0 9	0 5	0 6	0 31	0 14	0 4	0 10	0 6	0 12	0 25	0 24	0 6	0 1	0 2	0 1	0 30	0 30	0 20	0 30	0 36	0 16	0 14	0 24	0 26	0 22
tig00000650	1590794	C	T	0 23	0 19	0 19	0 15	0 28	0 16	0 18	0 22	0 28	0 23	0 11	0 1	0 10	0 21	0 6	0 15	0 27	0 9	6 7	0 6	0 7	0 9	0 4	0 6	0 31	0 14	0 4	0 10	0 6	0 12	0 24	0 23	0 6	0 1	0 2	0 1	29 0	27 0	20 0	29 0	14 0	16 0	5 0	27 0	24 0	24 0
tig00000650	1590794	CCCC	TCCA	0 23	0 19	0 19	0 15	0 28	0 16	0 18	0 22	0 28	0 23	0 11	0 1	0 10	0 21	0 6	0 15	0 27	0 9	0 7	0 6	0 7	0 9	0 4	0 6	0 31	0 14	0 4	0 10	0 6	0 12	0 24	0 23	0 6	0 1	0 2	0 1	0 0	0 0	0 0	0 0	20 0	0 0	8 0	0 0	1 0	0 0
tig00000650	1590801	C	A	0 23	0 20	0 18	0 15	0 28	0 16	0 18	0 22	0 28	0 23	0 9	0 1	0 10	0 21	0 6	0 15	0 27	0 9	0 13	0 6	0 6	0 9	0 4	0 6	0 31	0 14	0 4	0 10	0 6	0 12	0 25	0 26	0 6	0 2	0 2	0 1	0 29	0 28	0 23	0 28	0 34	0 18	0 12	0 26	0 26	0 27
tig00000650	1590805	C	CTTG	0 17	0 16	0 9	0 13	0 16	0 10	0 12	0 16	0 20	0 20	0 6	0 0	0 8	0 14	0 4	0 13	0 13	0 6	0 8	0 2	0 4	0 7	0 3	0 5	0 22	0 11	0 3	0 4	0 3	0 8	0 21	18 1	5 0	0 2	0 1	0 0	0 30	0 26	0 18	0 25	0 34	0 18	0 11	0 24	0 23	0 27
tig00000650	1590856	T	TTCC	0 0	0 0	0 0	0 0	0 0	0 0	0 0	0 0	0 0	0 0	0 0	0 0	0 0	0 0	0 0	0 0	0 0	0 0	0 0	0 3	0 0	0 0	0 0	0 0	0 0	0 0	0 0	0 0	0 0	0 0	0 5	0 14	1 6	0 2	0 0	0 0	0 30	0 21	0 24	0 25	0 35	0 20	0 13	0 28	0 24	0 23
tig00000650	1590856	T	TTCCTCC	0 0	0 0	0 0	0 0	0 0	0 0	0 0	0 0	0 0	0 0	0 0	0 0	0 0	0 0	0 0	0 0	0 0	0 0	0 0	0 3	0 0	0 0	0 0	0 0	0 0	0 0	0 0	0 0	0 0	0 0	0 5	0 14	0 6	0 2	0 0	0 0	0 30	0 21	0 24	0 25	0 35	0 20	0 13	0 28	0 24	0 23
tig00000650	1590863	T	C	0 0	0 0	0 0	0 0	0 0	0 0	0 0	0 0	0 0	0 0	0 0	0 0	0 0	0 0	0 0	0 0	0 0	0 0	0 0	0 3	0 0	0 0	0 0	0 0	0 0	0 0	0 0	0 0	0 0	0 0	0 5	0 14	0 6	0 2	0 0	0 0	0 30	0 21	0 24	0 25	0 35	0 20	0 13	0 28	0 24	0 23
tig00000650	1590879	G	A	0 7	0 7	0 6	0 12	0 2	0 10	0 2	0 7	0 11	0 7	0 3	0 0	0 1	0 9	0 6	0 2	0 14	0 3	0 2	0 4	0 2	0 4	0 3	0 4	0 12	0 11	0 2	0 3	0 2	0 6	0 7	0 19	0 9	0 4	0 0	0 0	0 36	0 26	0 25	0 32	0 36	0 22	0 14	0 30	0 25	0 26
tig00000650	1590896	C	T	0 18	0 13	0 10	0 17	0 6	0 18	0 5	0 15	0 16	0 14	0 4	0 0	0 2	0 22	0 8	0 6	0 24	0 5	0 9	0 4	0 9	0 8	0 3	0 6	0 19	0 15	0 5	0 4	0 3	0 7	0 14	0 21	0 8	0 4	0 0	0 0	0 33	0 24	0 25	0 29	0 36	0 24	0 14	0 32	0 22	0 29
tig00000650	1590915	G	T	0 28	0 19	0 19	0 23	0 13	0 27	0 8	0 22	0 26	0 19	0 11	0 1	0 3	0 17	0 13	0 9	0 29	0 7	0 12	0 6	0 13	0 9	0 4	0 7	0 31	0 22	0 12	0 9	0 6	0 9	0 18	0 28	0 9	0 1	0 2	0 0	0 38	0 21	0 25	0 35	0 42	0 25	0 15	0 31	0 21	0 33
tig00000650	1590920	T	A	0 28	0 20	0 20	0 23	0 13	0 30	0 9	0 26	0 31	0 20	0 13	0 1	0 4	0 35	0 14	0 10	0 33	0 7	0 12	0 6	0 13	0 9	0 5	0 7	0 33	0 22	0 13	0 9	0 7	0 11	0 19	0 28	0 9	0 1	0 2	0 0	0 40	0 21	0 28	0 32	0 37	0 25	0 16	0 29	0 22	0 33
tig00000650	1590920	TT	AG	0 28	0 20	0 20	0 23	0 13	0 30	0 9	0 26	0 31	0 20	0 13	0 1	0 4	0 35	0 14	0 10	0 33	0 7	0 12	0 6	0 13	0 9	0 5	0 7	0 33	0 22	0 13	0 9	0 7	0 11	0 19	0 28	0 9	0 1	0 2	0 0	0 40	0 21	0 28	0 32	0 37	0 25	0 16	0 29	0 22	0 33
tig00000650	1590943	AGC	GT	0 35	0 31	0 24	0 29	0 19	0 41	0 13	0 36	0 41	0 23	0 15	0 2	0 5	0 46	0 18	0 13	0 45	0 11	0 16	0 6	0 16	0 13	0 9	0 11	0 39	0 28	0 15	0 12	0 8	0 18	0 27	0 31	0 8	0 0	0 2	0 0	0 43	0 23	0 25	0 39	0 37	0 27	0 15	0 22	0 23	0 31
tig00000650	1590945	C	T	0 35	0 31	0 24	0 29	0 19	0 41	0 13	0 36	0 41	0 23	0 15	0 2	0 5	0 46	0 18	0 13	0 45	0 11	0 16	0 6	0 16	0 13	0 9	0 11	0 39	0 28	0 15	0 12	0 8	0 18	0 27	0 31	0 8	0 0	0 2	0 0	0 43	0 23	0 25	0 39	0 37	0 27	0 15	0 22	0 23	0 31
tig00000650	1590946	TAG	T	0 36	0 28	0 26	0 27	0 20	0 43	0 17	0 38	0 40	0 25	0 18	0 3	0 5	0 48	0 17	0 13	0 40	0 12	0 15	0 5	0 15	0 13	0 10	0 10	0 37	0 26	0 15	0 13	0 8	0 19	0 25	0 31	0 8	0 0	0 0	0 0	0 39	0 24	0 25	0 38	0 33	0 27	0 15	0 20	9 11	19 8
tig00000650	1590950	G	T	0 36	0 28	0 26	0 27	0 20	0 43	0 17	0 38	0 40	0 25	0 18	0 3	0 5	0 48	0 17	0 13	0 40	0 12	0 15	0 5	0 15	0 13	0 10	0 10	0 37	0 26	0 15	0 13	0 8	0 19	0 25	0 31	0 8	0 0	2 0	1 0	0 39	0 24	0 25	0 38	0 33	0 27	0 15	0 20	0 11	0 8
tig00000650	1590951	A	G	0 36	0 28	0 26	0 27	0 20	0 43	0 17	0 38	0 40	0 25	0 18	0 3	0 5	0 48	0 17	0 13	0 40	0 12	0 15	0 5	0 15	0 13	0 10	0 10	0 37	0 26	0 15	0 13	0 8	0 19	0 25	0 31	0 8	0 0	0 0	0 0	0 39	0 24	0 25	0 38	1 33	0 27	0 15	0 20	0 11	0 8
tig00000650	1590961	G	A	0 43	0 31	0 27	0 33	0 23	0 40	0 17	0 42	0 41	0 25	0 17	0 4	0 5	0 52	0 16	0 17	0 44	0 14	0 16	0 5	0 16	0 13	0 9	0 10	0 39	0 26	0 16	0 16	0 13	0 20	0 29	0 33	0 8	0 0	0 2	0 2	0 36	0 23	0 22	0 41	0 32	0 24	0 13	0 22	0 25	0 30
tig00000650	1590969	TGA	T	0 41	0 30	0 25	0 23	0 23	0 36	0 15	0 42	0 37	0 21	0 16	0 3	0 5	0 48	0 14	0 16	0 40	0 12	0 17	0 4	0 13	0 12	0 9	0 8	0 35	0 25	0 15	0 14	0 13	0 17	0 10	0 34	0 8	0 0	0 2	0 1	0 37	0 21	0 19	0 34	0 28	0 23	0 11	0 20	0 23	0 28
tig00000650	1590971	A	T	0 41	0 30	0 25	0 23	0 23	0 36	0 15	0 42	0 37	0 21	0 16	0 3	0 5	0 48	0 14	0 16	0 40	0 12	0 17	0 4	0 13	0 12	0 9	0 8	0 35	0 25	0 15	0 14	0 13	0 17	21 10	0 34	0 8	0 0	0 2	0 1	0 37	0 21	0 19	0 34	0 28	0 23	0 11	0 20	0 23	0 28
tig00000650	1590971	AGT	TGA	0 41	0 30	0 25	0 23	0 23	0 36	0 15	0 42	0 37	0 21	0 16	0 3	0 5	0 48	0 14	0 16	0 40	0 12	0 17	0 4	0 13	0 12	0 9	0 8	0 35	0 25	0 15	0 14	0 13	0 17	0 10	0 34	0 8	0 0	0 2	0 1	0 37	0 21	0 19	0 34	0 28	0 23	0 11	0 20	0 23	0 28
tig00000650	1590972	GTTGA	G	0 41	0 30	0 25	0 23	0 23	0 36	0 15	0 42	0 37	0 21	0 16	0 3	0 5	0 48	0 14	0 16	0 40	0 12	0 17	0 4	0 13	0 12	0 9	0 8	0 35	0 25	0 15	0 14	0 13	0 17	0 10	0 34	0 8	0 0	0 2	0 1	0 37	0 21	0 19	0 34	0 28	0 23	0 11	0 20	0 23	0 28
tig00000650	1590973	T	G	0 41	0 30	0 25	0 23	0 23	0 36	0 15	0 42	0 37	0 21	0 16	0 3	0 5	0 48	0 14	0 16	0 40	0 12	0 17	0 4	0 13	0 12	0 9	0 8	0 35	0 25	0 15	0 14	0 13	0 17	0 10	0 34	0 8	0 0	0 2	0 1	0 37	0 21	0 19	0 34	0 28	0 23	0 11	0 20	0 23	0 28
tig00000650	1590984	G	T	0 41	0 36	0 26	0 27	0 25	0 42	0 18	0 48	0 40	0 21	0 15	0 4	0 7	0 48	0 14	0 16	0 44	0 12	0 17	0 5	0 16	0 15	0 9	0 11	0 40	0 27	0 14	0 17	0 13	0 21	22 11	0 36	0 7	0 0	0 1	0 2	0 42	0 21	0 20	0 36	0 34	0 24	0 16	0 21	0 27	0 32
tig00000650	1590987	G	T	0 41	0 37	0 27	0 26	0 25	0 41	0 19	0 48	0 41	20 0	0 14	0 4	0 8	1 47	0 13	0 17	23 18	0 13	0 17	0 5	0 16	0 16	0 9	0 12	0 37	0 27	0 15	0 18	0 13	0 24	0 32	0 35	0 7	0 0	0 1	0 2	0 42	0 20	0 21	0 33	0 34	0 24	0 15	0 22	0 27	0 32
tig00000650	1590990	A	G	0 37	0 35	0 27	0 29	0 26	0 43	0 18	0 48	0 45	0 20	0 13	0 4	0 8	0 48	0 13	0 17	0 39	0 13	0 15	0 5	0 17	0 14	0 9	0 14	0 38	0 27	0 14	0 18	0 14	0 24	0 31	0 34	0 7	0 0	0 0	0 2	0 41	0 22	0 22	0 35	0 34	0 22	0 17	0 23	0 27	0 33
tig00000650	1590991	G	T	0 38	0 34	0 27	0 28	0 26	0 42	0 19	0 49	0 45	0 20	0 13	0 4	0 8	0 47	0 13	0 17	0 38	0 13	0 15	0 5	0 17	0 14	0 8	0 14	0 38	0 25	0 14	0 18	0 14	0 24	21 10	0 34	0 7	0 0	0 0	0 2	0 40	0 21	0 21	0 35	0 34	0 22	0 16	0 22	0 27	0 33
tig00000650	1590996	G	A	0 37	0 30	0 25	0 27	0 28	0 41	0 19	0 48	0 44	0 20	0 12	0 4	0 8	0 42	0 12	0 16	0 38	0 13	0 14	0 5	0 14	0 13	0 10	0 14	0 40	0 24	0 13	0 18	0 14	0 26	0 32	0 32	0 4	0 0	0 0	0 2	0 41	0 22	0 21	0 36	0 34	0 22	0 17	0 16	0 29	0 37
tig00000650	1591001	G	T	0 35	0 32	0 27	0 28	0 28	0 40	0 18	0 47	0 45	0 18	0 12	0 4	0 9	0 39	0 13	0 15	0 39	0 13	0 14	0 5	0 15	0 13	0 11	0 15	0 41	0 23	0 14	0 18	0 17	0 26	0 31	0 31	0 4	0 2	0 0	0 2	0 42	0 22	0 21	0 36	0 32	0 21	0 16	0 17	0 28	0 38
tig00000650	1591011	TTTTTTATTTTTATATA	ATTTTTATTTTTATATG	0 27	0 24	0 21	0 25	0 23	0 34	0 16	0 40	0 29	0 13	0 8	0 3	0 7	0 29	0 7	0 9	0 30	0 10	0 9	0 3	0 10	0 13	0 9	0 15	0 33	0 21	0 8	0 12	0 15	0 20	0 8	0 23	0 6	0 0	0 0	0 0	0 0	0 0	0 0	0 0	0 0	0 0	0 0	0 0	0 0	0 0
tig00000650	1591012	T	C	0 27	0 24	0 21	0 25	0 23	0 34	0 16	0 40	0 29	0 13	0 8	0 3	0 7	0 29	0 7	0 9	0 30	0 10	0 9	0 3	0 10	0 13	0 9	0 15	0 33	0 21	0 8	0 12	0 15	0 20	15 8	0 23	0 6	0 0	0 0	0 0	0 0	0 0	0 0	0 0	0 0	0 0	0 0	0 0	0 0	0 0
tig00000650	1591015	T	G	0 27	0 24	0 21	0 25	0 23	0 34	0 16	0 40	0 29	0 13	0 8	0 3	0 7	0 29	0 7	0 9	0 30	0 10	0 9	0 3	0 10	0 13	0 9	0 15	0 33	0 21	0 8	0 12	0 15	0 20	0 8	0 23	0 6	0 0	0 0	0 0	0 0	0 0	0 0	0 0	0 0	0 0	0 0	0 0	0 0	0 0
tig00000650	1591017	ATTTTTATATA	TATTTTTATATG	0 27	0 24	0 21	0 25	0 23	0 34	0 16	0 40	0 29	0 13	0 8	0 3	0 7	0 29	0 7	0 9	0 30	0 10	2 9	0 3	0 10	0 13	0 9	0 15	0 33	0 21	0 8	0 12	0 15	0 20	0 8	0 23	0 6	0 0	0 0	0 0	0 0	0 0	0 0	0 0	0 0	0 0	0 0	7 0	23 0	26 0
tig00000650	1591017	ATTTTTATATA	TTATTTTTATATG	0 27	0 24	0 21	0 25	0 23	0 34	0 16	0 40	0 29	0 13	0 8	0 3	0 7	0 29	0 7	0 9	0 30	0 10	0 9	0 3	0 10	0 13	0 9	0 15	0 33	0 21	0 8	0 12	0 15	0 20	0 8	0 23	0 6	0 0	0 0	0 0	0 0	0 0	0 0	0 0	16 0	0 0	8 0	0 0	0 0	0 0
tig00000650	1591017	ATTTTTATATA	TTTTTATATG	0 27	0 24	0 21	0 25	0 23	0 34	0 16	0 40	0 29	0 13	0 8	0 3	0 7	0 29	0 7	0 9	0 30	0 10	0 9	0 3	0 10	0 13	0 9	0 15	0 33	0 21	0 8	0 12	0 15	0 20	0 8	0 23	0 6	0 0	0 0	0 0	0 0	0 0	0 0	0 0	0 0	0 0	0 0	0 0	0 0	0 0
tig00000650	1591027	A	G	0 27	0 24	0 21	0 25	0 23	0 34	0 16	0 40	0 29	0 13	0 8	0 3	0 7	0 29	0 7	0 9	0 30	0 10	0 9	0 3	0 10	0 13	0 9	0 15	0 33	0 21	0 8	0 12	0 15	0 20	0 8	0 23	0 6	2 0	0 0	1 0	31 0	17 0	18 0	31 0	16 0	21 0	9 0	7 0	0 0	8 0
tig00000650	1591033	C	T	0 38	0 38	0 25	0 31	0 26	0 39	0 15	0 53	0 40	0 20	0 10	0 3	0 8	0 37	0 11	0 12	0 43	0 11	0 23	0 3	0 12	0 12	0 11	0 20	0 44	0 28	0 11	0 12	0 15	0 20	0 37	0 25	0 7	0 2	0 0	0 3	0 35	0 27	0 22	0 32	0 37	0 30	0 21	0 17	0 30	0 37
tig00000650	1591035	AAATA	GAATT	0 38	0 38	0 25	0 31	0 26	0 39	0 15	0 53	0 40	0 20	0 10	0 3	0 8	0 37	0 11	0 12	0 43	0 11	0 23	0 3	0 12	0 12	0 11	0 20	0 44	0 28	0 11	0 12	0 15	0 20	0 37	0 25	0 7	0 2	0 0	0 3	0 35	0 27	0 22	0 32	0 37	0 30	0 21	0 17	0 30	0 37
tig00000650	1591039	A	T	0 38	0 38	0 25	0 31	0 26	0 39	0 15	0 53	0 40	0 20	0 10	0 3	0 8	0 37	0 11	0 12	0 43	0 11	0 23	0 3	0 12	0 12	0 11	0 20	0 44	0 28	0 11	0 12	0 15	0 20	0 37	0 25	0 7	0 2	0 0	0 3	0 35	0 27	0 22	0 32	0 37	0 30	0 21	0 17	0 30	0 37
tig00000650	1591046	CGAG	C	29 0	30 0	19 0	28 0	22 0	33 0	9 0	42 0	39 0	17 0	8 0	1 0	7 0	24 0	9 0	12 0	40 0	11 0	9 13	0 4	12 0	11 0	8 0	18 0	39 0	15 11	8 0	7 0	15 0	15 0	0 34	0 13	2 5	0 0	0 0	0 3	0 40	0 27	0 25	0 34	0 32	0 31	0 22	0 20	0 27	0 32
tig00000650	1591057	T	A	0 30	0 43	0 24	0 31	0 28	0 40	0 10	0 53	0 46	0 25	0 13	0 1	0 9	0 37	0 10	0 15	0 47	0 14	0 32	0 4	0 12	0 15	0 10	0 23	0 44	0 36	0 13	0 10	0 15	0 17	0 38	0 21	0 8	0 3	0 0	0 3	0 46	0 28	0 23	0 35	0 32	0 33	0 24	0 20	0 30	0 38
tig00000650	1591057	T	G	0 30	0 43	0 24	0 31	0 28	0 40	0 10	0 53	0 46	0 25	0 13	0 1	0 9	0 37	0 10	0 15	0 47	0 14	0 32	0 4	0 12	0 15	0 10	0 23	0 44	0 36	0 13	0 10	0 15	0 17	0 38	0 21	0 8	0 3	0 0	0 3	0 46	0 28	0 23	0 35	0 32	0 33	0 24	0 20	0 30	0 38
tig00000650	1591065	G	T	0 30	0 42	0 23	0 30	0 28	1 37	0 9	0 51	0 46	1 24	0 12	0 1	0 9	0 36	0 10	0 15	0 46	0 14	0 30	0 5	0 12	0 15	0 10	0 22	0 42	0 35	0 12	0 8	0 15	0 16	14 25	11 11	0 6	0 3	0 0	0 3	0 42	0 31	0 24	0 33	0 32	0 33	0 26	0 21	0 30	0 39
tig00000650	1591070	A	AT	0 28	0 38	0 20	0 27	0 25	0 33	0 7	0 44	0 45	0 23	0 12	0 1	0 8	0 33	0 10	0 13	0 44	0 13	0 14	0 5	0 11	0 11	0 9	0 20	0 38	0 35	0 12	0 5	0 14	0 13	0 27	0 11	0 7	0 4	0 0	0 3	0 43	0 31	0 21	0 32	0 33	0 34	0 26	0 19	0 29	0 39
tig00000650	1591070	A	G	0 28	0 38	0 20	0 27	0 25	0 33	0 7	0 44	0 45	0 23	0 12	0 1	0 8	0 33	0 10	0 13	0 44	0 13	12 14	0 5	0 11	0 11	0 9	0 20	0 38	0 35	0 12	0 5	0 14	0 13	0 27	0 11	0 7	0 4	0 0	0 3	0 43	0 31	0 21	0 32	0 33	0 34	0 26	0 19	0 29	0 39
tig00000650	1591080	A	G	0 28	0 34	0 20	0 26	0 24	0 31	0 5	0 39	0 45	0 22	0 12	0 1	0 8	0 32	0 9	0 13	0 44	0 13	0 27	0 6	0 8	0 10	0 9	0 17	0 37	0 34	0 11	0 3	0 14	0 12	0 29	0 8	0 5	0 4	0 0	0 3	0 44	0 31	0 20	0 29	0 34	0 37	0 29	0 20	0 35	0 38
tig00000650	1591081	AAG	A	0 24	0 29	0 18	0 26	0 23	0 27	0 5	0 35	0 40	0 18	0 11	0 1	0 6	0 26	0 9	0 11	0 36	0 9	0 25	0 6	0 6	0 9	0 8	0 17	0 31	0 29	0 10	0 2	0 13	0 7	0 27	0 11	0 6	0 4	0 0	0 3	0 43	0 30	0 21	12 15	0 28	0 36	0 28	0 22	0 35	0 36
tig00000650	1591085	GAGTG	TACTT	0 24	0 29	0 18	0 26	0 23	0 27	0 5	0 35	0 40	0 18	0 11	0 1	0 6	0 26	0 9	0 11	0 36	0 9	0 25	0 6	0 6	0 9	0 8	0 17	0 31	0 29	0 10	0 2	0 13	0 7	0 27	0 11	0 6	0 4	0 0	0 3	0 43	0 30	0 21	0 15	0 28	0 36	0 28	0 22	0 35	0 36
tig00000650	1591096	TAT	A	0 21	0 30	0 17	0 25	0 19	0 27	0 8	0 35	0 37	0 19	0 15	0 1	0 7	0 29	0 9	0 12	0 38	0 9	0 24	0 7	0 6	0 9	0 6	0 18	0 33	0 33	0 12	0 6	0 11	0 5	0 24	0 19	0 8	0 4	0 0	0 3	0 44	0 30	0 21	0 33	0 28	0 35	0 31	0 22	0 36	0 38
tig00000650	1591104	G	A	0 22	0 28	0 18	0 24	0 19	0 29	0 10	0 36	0 36	0 18	0 15	0 1	0 6	0 35	0 9	0 14	0 40	0 9	0 27	0 7	0 5	0 12	0 9	0 17	0 34	0 37	0 12	0 6	0 10	0 5	0 25	0 21	0 8	0 2	0 0	0 3	0 46	0 29	0 19	0 33	0 27	0 34	0 31	0 20	0 35	0 41
tig00000650	1591111	C	T	0 24	0 27	0 17	0 23	0 19	0 26	0 9	0 36	0 41	0 21	0 14	0 1	0 6	0 33	0 11	0 14	0 41	0 9	0 27	0 7	0 6	0 12	0 9	0 19	0 33	15 19	0 15	0 6	0 8	0 5	0 27	0 23	0 7	0 2	0 0	0 4	0 45	0 32	0 19	0 36	0 30	0 36	0 31	0 19	0 35	0 43
tig00000650	1591114	TAA	T	0 25	0 23	0 14	0 23	0 16	0 23	0 9	0 35	0 37	0 18	0 13	0 1	0 5	0 29	0 8	0 12	0 37	0 9	0 23	0 6	0 4	0 11	0 7	0 15	0 35	0 30	0 15	0 7	0 9	0 4	0 28	0 22	0 7	0 2	0 0	0 4	40 0	26 0	17 0	31 0	19 7	33 0	14 17	0 17	0 35	14 28
tig00000650	1591149	TA	GT	1 0	0 0	0 0	0 0	0 0	0 0	0 0	0 0	0 0	0 0	0 0	0 0	0 0	0 0	0 0	0 0	0 0	0 0	0 11	0 4	0 0	0 0	0 0	0 0	0 1	0 12	0 0	0 0	0 0	0 0	0 18	0 15	0 2	0 2	0 1	0 4	39 0	32 0	15 0	30 0	16 11	35 0	16 14	0 17	0 30	14 17
tig00000650	1591150	A	T	45 0	26 0	14 0	24 0	15 0	26 0	20 0	25 0	40 0	15 0	9 0	1 0	6 0	37 0	11 0	12 0	35 0	9 0	12 11	0 4	7 0	12 0	11 0	18 0	33 1	11 12	16 0	12 0	6 0	8 0	22 18	20 15	6 2	0 2	0 1	0 4	0 0	0 0	0 0	0 0	0 11	0 0	0 14	0 17	0 30	0 17
tig00000650	1591157	T	A	0 48	0 27	0 14	0 29	0 17	0 27	0 21	0 24	0 41	0 15	0 9	0 1	0 5	0 37	0 12	0 14	0 39	0 8	0 21	0 4	0 7	0 14	0 11	0 18	0 36	0 24	0 16	0 13	0 9	0 9	0 40	0 38	0 8	0 1	0 1	0 5	0 39	0 35	0 21	0 31	0 27	0 39	15 17	0 16	0 32	0 32
tig00000650	1591169	A	C	0 54	0 35	0 15	0 34	0 22	0 36	0 24	0 28	0 46	0 17	0 11	0 1	0 6	0 38	0 12	0 15	0 46	0 9	0 25	0 4	0 8	0 15	0 11	0 20	0 42	0 28	0 18	0 14	0 13	0 11	0 45	0 39	0 9	0 0	0 1	0 5	0 43	0 28	0 19	0 34	0 26	0 35	0 32	0 14	0 32	0 33
tig00000650	1591180	T	A	0 0	0 0	0 0	0 0	0 0	0 0	0 0	0 0	0 0	0 0	0 0	0 0	0 0	0 0	0 0	0 0	0 0	0 0	8 0	0 4	0 0	0 0	0 0	0 0	0 0	11 0	0 0	0 0	0 0	0 0	13 27	16 0	2 0	0 0	0 0	0 0	0 38	0 27	0 18	0 29	1 14	0 29	2 13	0 0	15 0	19 12
tig00000650	1591180	TTGG	ATGGTTAAAAAC	0 0	0 0	0 0	0 0	0 0	0 0	0 0	0 0	0 0	0 0	0 0	0 0	0 0	0 0	0 0	0 0	0 0	0 0	0 0	0 4	0 0	0 0	0 0	0 0	0 0	0 0	0 0	0 0	0 0	0 0	0 27	0 0	0 0	0 0	0 0	0 0	0 38	0 27	0 18	0 29	7 14	0 29	12 13	10 0	12 0	0 12
tig00000650	1591182	G	A	0 0	0 0	0 0	0 0	0 0	0 0	0 0	0 0	0 0	0 0	0 0	0 0	0 0	0 0	0 0	0 0	0 0	0 0	0 0	0 4	0 0	0 0	0 0	0 0	0 0	0 0	0 0	0 0	0 0	0 0	0 27	0 0	0 0	0 0	1 0	6 0	0 38	0 27	0 18	0 29	0 14	0 29	0 13	0 0	0 0	0 12
tig00000650	1591186	A	T	33 0	24 0	6 0	24 0	13 0	24 0	13 0	20 0	25 0	13 0	7 0	2 0	5 0	21 0	6 0	12 0	31 0	4 0	7 0	0 4	8 0	9 0	6 0	8 0	24 0	11 0	10 0	6 0	11 0	7 0	0 27	17 0	6 0	0 0	0 0	0 0	0 38	0 27	0 18	0 29	0 14	0 29	0 13	0 0	0 0	0 12
tig00000650	1591189	ACTTTAAATCTCTTGTTGC	A	0 56	0 30	0 12	0 32	0 20	0 32	0 18	0 34	0 44	0 19	0 10	0 2	0 7	0 35	0 11	0 17	0 40	0 8	0 23	0 4	0 9	0 16	0 11	0 14	0 39	0 26	0 16	0 11	0 12	0 13	0 39	0 43	0 8	0 2	0 2	0 5	26 0	17 0	11 0	8 14	9 9	21 0	7 14	0 13	0 29	7 18
tig00000650	1591201	T	C	0 56	0 30	0 12	0 32	0 20	0 32	0 18	0 34	0 44	0 19	0 10	0 2	0 7	0 35	0 11	0 17	0 40	0 8	0 23	0 4	0 9	0 16	0 11	0 14	0 39	0 26	0 16	0 11	0 12	0 13	0 39	0 43	0 8	0 2	0 2	0 5	0 0	0 0	0 0	0 14	0 9	0 0	0 14	0 13	0 29	0 18
tig00000650	1591214	G	T	0 67	0 42	0 25	0 44	0 25	0 47	0 25	0 41	0 51	0 24	0 15	0 3	0 8	0 44	0 16	0 20	0 55	0 14	0 26	0 4	0 11	0 17	0 16	0 18	0 54	0 34	0 16	0 12	0 18	0 16	0 60	0 53	0 9	0 4	0 5	0 5	0 30	0 30	0 17	0 32	0 21	0 27	0 24	0 15	0 34	0 30
tig00000650	1591224	C	G	0 63	0 38	0 26	0 38	0 38	0 51	0 46	0 45	0 47	0 37	0 16	0 5	0 13	0 45	0 15	0 36	0 57	0 12	0 26	0 4	0 10	0 15	0 14	0 17	0 59	0 36	0 16	0 9	0 20	0 16	0 55	0 48	0 9	4 0	4 0	5 0	0 33	0 33	0 19	0 34	0 26	0 29	0 23	0 14	0 29	0 33
tig00000650	1591226	A	C	0 62	0 40	0 25	0 38	0 40	0 52	0 45	0 45	0 47	0 40	0 16	0 5	0 14	0 43	0 13	0 37	0 59	0 13	0 26	0 4	0 11	0 16	0 15	0 17	0 59	0 37	0 15	0 10	0 20	0 16	28 26	0 47	0 9	0 4	0 4	0 5	0 33	0 34	0 20	0 36	0 25	0 29	0 23	0 15	0 29	0 34
tig00000650	1591227	A	G	0 62	0 40	0 25	0 40	0 40	0 51	0 42	0 45	0 47	0 41	0 16	0 5	0 14	0 42	0 12	0 36	0 58	0 13	0 26	0 4	0 11	0 16	0 15	0 17	0 58	22 15	0 15	0 10	0 20	0 16	26 29	25 22	3 4	0 4	0 4	0 5	0 32	0 33	0 20	0 35	0 25	0 30	0 22	0 14	0 30	0 34
tig00000650	1591235	T	C	0 61	0 46	0 27	0 38	0 43	0 53	0 48	0 47	0 44	0 43	0 17	0 4	0 14	0 44	0 11	0 35	0 61	0 12	0 28	0 4	0 11	0 15	0 14	0 19	0 64	0 41	0 16	0 9	0 21	0 16	0 50	0 44	0 9	0 4	0 4	0 5	0 33	0 30	0 18	0 35	0 26	0 30	0 23	0 17	0 27	0 33
tig00000650	1591239	A	T	0 61	0 45	0 27	0 39	0 44	0 52	0 50	0 51	0 46	0 44	0 16	0 5	0 14	0 44	0 12	0 38	0 58	0 12	14 14	0 4	0 10	0 16	0 15	0 20	0 63	0 42	0 14	0 9	0 22	0 17	0 49	0 46	0 11	0 4	0 4	0 5	0 31	0 33	0 21	0 34	13 12	0 27	7 15	17 0	26 0	22 11
tig00000650	1591257	A	C	59 0	44 0	28 0	32 0	53 0	51 0	53 0	54 0	42 0	44 0	14 0	6 0	15 0	36 0	11 0	34 0	48 0	13 0	26 0	0 7	11 0	14 0	14 0	16 0	62 0	17 18	17 0	6 0	24 0	17 0	18 29	18 24	6 5	2 0	4 0	5 0	27 0	31 0	22 0	34 0	21 0	27 0	20 0	20 0	31 0	27 0
tig00000650	1591257	AAC	CAT	0 0	0 0	0 0	0 0	0 0	0 0	0 0	0 0	0 0	0 0	0 0	0 0	0 0	0 0	0 0	0 0	0 0	0 0	0 0	0 7	0 0	0 0	0 0	0 0	0 0	0 18	0 0	0 0	0 0	0 0	0 29	0 24	0 5	0 0	0 0	0 0	0 0	0 0	0 0	0 0	0 0	0 0	0 0	0 0	0 0	0 0
tig00000650	1591269	T	C	0 56	0 38	0 28	0 31	0 54	0 48	0 57	0 54	0 42	0 47	0 14	0 6	0 17	0 34	0 11	0 32	0 41	0 12	0 23	0 7	0 11	0 14	0 17	0 16	0 57	16 15	0 16	0 8	0 25	0 16	33 20	22 17	5 6	0 4	0 4	0 5	0 26	0 30	0 23	0 33	0 23	0 27	0 25	0 20	0 34	0 28
tig00000650	1591275	G	A	0 54	0 38	0 31	0 30	0 54	0 45	0 57	0 55	0 39	0 44	0 15	0 6	0 15	0 32	0 12	0 30	0 44	0 11	0 24	0 8	0 10	0 16	0 17	0 18	0 53	0 28	0 16	0 8	0 25	0 16	0 51	0 39	0 11	0 4	0 4	0 5	0 26	0 31	0 26	14 19	0 24	0 27	0 28	0 20	0 32	0 29
tig00000650	1591279	C	CTTAA	0 52	0 40	0 32	0 31	0 55	0 44	0 55	0 50	0 39	0 44	0 15	0 5	0 13	0 32	0 12	0 27	0 41	0 12	0 25	0 8	0 9	0 16	0 18	0 19	0 51	0 27	0 19	0 9	0 25	0 15	0 49	0 33	0 12	0 3	0 4	0 5	0 28	0 34	0 25	0 29	0 23	0 28	0 28	0 21	0 33	0 31
tig00000650	1591284	T	C	0 51	0 41	0 33	0 32	0 59	0 45	0 57	0 50	0 40	0 47	0 16	0 6	0 12	0 34	0 11	0 29	0 44	0 13	0 25	0 8	0 11	0 14	0 16	0 20	0 56	0 27	0 17	0 10	0 25	0 15	0 47	0 36	0 12	0 4	0 3	0 5	0 28	0 34	0 22	0 27	0 21	0 27	0 28	0 20	0 34	0 30
tig00000650	1591295	A	T	0 51	0 43	0 33	0 32	0 61	0 44	1 60	0 47	0 40	0 47	0 11	0 8	0 13	0 35	0 11	0 28	0 41	0 15	0 29	0 8	0 12	0 13	0 16	0 22	0 56	0 25	0 18	0 10	0 26	0 12	0 38	0 32	0 12	0 3	0 3	0 5	0 25	0 32	0 26	0 29	0 20	0 27	0 28	0 25	0 35	0 36
tig00000650	1591303	A	G	0 51	0 44	0 33	0 30	0 61	0 41	0 59	0 45	0 41	0 45	0 10	0 9	0 13	0 30	0 12	0 30	0 38	0 13	0 29	0 9	0 11	0 14	0 15	0 20	0 51	0 23	0 20	0 11	0 25	0 11	13 25	0 32	0 13	0 2	0 1	0 5	0 27	0 31	0 26	0 32	0 21	0 28	0 26	0 27	0 37	0 36
tig00000650	1591310	G	T	46 0	37 1	28 0	30 0	56 0	38 0	53 0	42 0	38 0	42 0	9 0	8 0	12 0	28 0	11 0	27 0	33 0	12 0	22 6	0 8	11 0	14 0	15 0	19 0	46 0	11 10	20 0	8 0	22 0	10 0	0 40	0 32	0 13	0 1	0 0	0 5	0 25	0 30	0 27	0 31	0 20	0 28	0 23	0 27	0 34	0 36
tig00000650	1591314	CCT	C	0 42	0 39	0 24	0 28	0 52	0 36	0 46	0 41	0 37	0 40	0 9	0 8	0 11	0 26	0 10	0 23	0 30	0 10	0 25	0 8	0 10	0 13	0 13	0 18	0 41	0 18	0 22	0 8	0 19	0 7	0 42	0 32	0 13	0 1	0 0	0 5	0 23	0 31	0 25	0 18	0 20	0 28	0 23	0 25	0 35	0 37
tig00000650	1591316	T	C	0 42	0 39	0 24	0 28	0 52	0 36	1 46	0 41	0 37	0 40	0 9	0 8	0 11	0 26	0 10	0 23	0 30	0 10	0 25	0 8	0 10	0 13	0 13	0 18	0 41	0 18	0 22	0 8	0 19	0 7	0 42	0 32	0 13	0 1	0 0	0 5	0 23	0 31	0 25	12 18	0 20	0 28	0 23	0 25	0 35	0 37
tig00000650	1591326	A	AAG	24 0	17 3	13 0	17 0	31 0	15 0	23 2	20 0	17 0	17 0	3 0	4 0	4 0	12 0	5 0	11 0	17 0	6 0	16 0	0 7	7 0	7 0	5 0	12 0	23 0	4 0	8 10	2 0	10 0	3 0	0 0	0 0	0 0	0 0	0 0	0 0	17 0	24 0	21 0	27 0	7 11	26 0	13 9	0 27	0 20	7 0
tig00000650	1591330	G	GAA	0 0	0 3	0 0	0 0	0 0	0 0	0 2	0 0	0 0	0 0	0 0	0 0	0 0	0 0	0 0	0 0	0 0	0 0	1 0	0 7	0 0	0 0	0 0	0 0	0 0	5 0	0 10	0 0	0 0	0 0	36 0	24 0	11 0	1 0	0 0	4 0	0 0	0 0	0 0	0 0	0 11	0 0	0 9	0 27	13 20	18 0
tig00000650	1591372	C	T	0 41	0 33	0 21	0 32	0 49	0 24	0 33	0 26	0 36	0 30	0 15	0 7	0 12	0 35	0 15	0 29	0 32	0 12	0 37	0 12	0 12	0 15	0 9	0 17	0 34	0 24	0 19	0 6	0 13	0 7	0 46	0 30	0 12	0 1	0 1	0 3	0 29	1 26	0 29	0 28	0 28	0 28	0 24	0 26	0 36	0 28
tig00000650	1591379	A	T	0 37	0 27	0 19	0 29	0 44	0 22	0 30	0 23	0 32	0 27	0 13	0 6	0 12	0 32	0 14	0 27	0 30	0 11	0 33	0 12	0 10	0 12	0 8	0 14	0 31	0 23	0 13	0 4	0 13	0 5	0 49	0 32	0 13	0 0	0 1	0 3	0 27	0 28	0 30	0 31	0 31	0 28	0 25	0 23	0 36	0 30
tig00000650	1591425	A	G	17 0	12 0	10 0	15 0	23 0	9 0	13 0	11 0	15 0	13 0	10 0	1 0	9 0	19 0	7 0	12 0	20 0	6 0	6 12	0 9	5 0	10 0	5 0	6 0	16 0	10 11	8 0	2 0	10 0	5 0	0 48	18 21	7 6	0 0	0 3	0 1	0 26	0 28	0 32	0 33	0 31	0 25	0 20	0 19	0 33	0 42
tig00000650	1591444	G	T	0 6	0 5	0 2	0 9	0 10	0 3	0 9	0 3	0 8	0 5	0 4	0 1	0 4	0 10	0 4	0 3	0 5	0 2	0 6	0 10	0 2	0 7	0 3	0 2	0 9	0 10	0 2	0 0	0 4	0 2	0 46	0 36	0 13	0 0	0 0	0 0	0 28	0 27	0 35	0 36	0 34	0 29	0 27	0 19	0 32	0 36
tig00000650	1591465	A	G	0 6	0 8	0 7	0 13	0 10	0 16	0 7	0 8	0 12	0 12	0 9	0 2	0 5	0 14	0 1	0 9	0 11	0 3	0 4	0 11	0 3	0 3	0 5	0 0	0 6	0 6	0 2	0 3	0 1	0 4	0 50	0 41	0 13	0 0	0 2	0 0	0 31	0 33	0 32	0 36	0 40	0 32	0 34	0 18	0 41	0 41
tig00000650	1591477	TCA	T	0 0	0 0	0 0	0 0	0 0	0 0	0 0	0 0	0 0	0 0	0 0	0 0	0 0	0 0	0 0	0 0	0 0	0 0	0 0	0 10	0 0	0 0	0 0	0 0	0 0	0 0	0 0	0 0	0 0	0 0	25 0	0 0	0 0	0 0	0 0	0 0	0 0	0 0	0 0	0 0	0 0	0 0	0 0	0 0	0 0	0 0
tig00000650	1591480	C	G	16 0	15 0	10 0	21 0	16 0	22 0	11 0	14 0	23 0	20 0	13 0	5 0	7 0	18 0	4 0	16 0	19 0	5 0	6 0	0 10	4 0	6 0	8 0	3 0	15 0	15 0	6 0	5 0	2 0	5 0	22 0	45 0	13 0	0 0	0 0	0 0	31 0	30 0	33 0	38 0	41 0	31 0	32 0	18 0	36 0	40 0
tig00000650	1591480	C	T	0 0	0 0	0 0	0 0	0 0	0 0	0 0	0 0	0 0	0 0	0 0	0 0	0 0	0 0	0 0	0 0	0 0	0 0	0 0	0 10	0 0	0 0	0 0	0 0	0 0	0 0	0 0	0 0	0 0	0 0	1 0	0 0	0 0	0 0	2 0	0 0	0 0	0 0	0 0	0 0	0 0	0 0	0 0	0 0	0 0	0 0
tig00000650	1591493	C	T	0 25	0 20	0 22	0 26	0 27	0 29	0 18	0 22	0 35	0 29	0 18	0 7	0 8	0 27	0 8	0 25	0 29	0 10	0 18	0 9	0 9	0 8	0 10	0 3	0 20	0 17	0 11	0 7	0 8	0 8	0 48	0 48	0 12	0 0	0 0	0 0	0 32	0 32	0 37	0 32	0 35	0 35	0 32	0 19	0 33	0 37
tig00000650	1591499	CA	AATAT	0 28	0 20	0 24	0 29	0 32	0 32	0 19	0 27	0 38	0 35	0 20	0 8	0 9	0 27	0 8	0 27	0 33	0 10	0 19	0 8	0 12	0 10	0 11	0 4	0 27	0 21	0 11	0 7	0 10	0 8	0 39	16 25	8 4	0 0	0 0	0 0	0 0	0 0	0 0	0 9	0 0	0 0	0 0	0 0	0 0	0 0
tig00000650	1591503	CAATG	TAATA	0 28	0 20	0 24	0 29	0 32	0 32	0 19	0 27	0 38	0 35	0 20	0 8	0 9	0 27	0 8	0 27	0 33	0 10	0 19	0 8	0 12	0 10	0 11	0 4	0 27	0 21	0 11	0 7	0 10	0 8	0 39	0 25	0 4	0 0	0 0	0 0	0 0	0 0	0 0	0 9	24 0	0 0	14 0	20 0	19 0	0 0
tig00000650	1591507	G	A	0 28	0 20	0 24	0 29	0 32	0 32	0 19	0 27	0 38	0 35	0 20	0 8	0 9	0 27	0 8	0 27	0 33	0 10	0 19	0 8	0 12	0 10	0 11	0 4	0 27	0 21	0 11	0 7	0 10	0 8	0 39	0 25	0 4	0 0	0 0	0 0	38 0	32 0	35 0	19 9	8 0	32 0	18 0	0 0	16 0	35 0
tig00000650	1591527	A	G	46 0	40 0	37 0	42 0	63 0	50 0	38 0	49 0	58 0	52 0	32 0	11 0	14 0	46 0	18 0	39 0	50 1	11 0	36 0	0 9	16 0	18 0	13 0	11 0	41 0	33 0	13 0	12 0	16 0	9 0	41 0	45 0	14 0	0 0	0 0	0 0	45 0	37 0	39 0	19 10	38 0	39 0	31 0	24 0	37 0	37 0
tig00000650	1591532	G	A	0 51	0 43	0 40	0 45	0 66	0 53	0 42	0 49	0 61	0 57	0 33	0 11	0 16	0 46	0 18	0 42	0 58	0 13	0 37	0 10	0 17	0 20	0 14	0 11	0 43	0 33	0 14	0 13	0 16	0 12	20 17	0 43	0 14	0 0	0 0	0 0	0 43	0 42	0 42	0 33	0 39	0 40	0 31	0 27	0 39	0 34
tig00000650	1591532	GA	G	0 51	0 43	0 40	0 45	0 66	0 53	0 42	0 49	0 61	0 57	0 33	0 11	0 16	0 46	0 18	0 42	0 58	0 13	0 37	0 10	0 17	0 20	0 14	0 11	0 43	0 33	0 14	0 13	0 16	0 12	0 17	0 43	0 14	0 0	0 0	0 0	0 43	0 42	0 42	0 33	0 39	0 40	0 31	0 27	0 39	0 34
tig00000650	1591536	C	T	0 54	0 43	0 41	0 46	0 69	0 54	0 43	0 51	0 62	0 57	0 35	0 11	0 17	0 49	0 19	0 45	0 59	0 14	0 40	0 10	0 17	0 20	0 14	0 11	0 44	0 34	0 14	0 13	0 16	0 12	0 35	0 44	0 14	0 0	0 0	0 0	0 44	0 41	0 41	10 21	0 39	0 40	0 31	0 27	0 40	0 32
tig00000650	1591537	G	T	0 55	0 44	0 43	0 46	0 68	0 54	0 45	0 53	0 63	0 57	0 35	0 11	0 16	0 48	0 19	0 46	0 59	0 14	0 42	0 9	0 17	0 19	0 14	0 11	0 46	0 35	0 15	0 13	0 16	0 12	0 34	0 41	0 13	0 1	0 0	0 0	0 43	0 42	0 41	0 32	0 39	0 40	0 30	0 27	0 40	0 32
tig00000650	1591545	A	G	0 60	0 49	0 50	0 47	0 73	0 61	0 48	0 52	0 67	0 61	0 38	0 11	0 17	0 51	0 21	0 48	0 60	0 14	0 41	0 10	0 19	0 21	0 15	0 13	0 48	0 42	0 18	0 14	0 17	0 13	0 37	0 38	0 15	0 1	0 0	0 0	0 46	0 40	0 44	0 33	0 44	0 39	0 29	0 27	0 38	0 33
tig00000650	1591597	T	C	0 54	0 43	0 52	0 52	0 82	0 55	0 52	0 51	0 50	0 57	0 30	0 8	0 14	0 49	0 17	0 49	0 53	0 17	0 43	0 10	0 19	0 21	0 13	0 17	0 47	23 17	0 22	0 12	0 14	0 16	26 21	21 20	7 7	0 2	0 0	0 0	0 57	0 40	0 45	0 32	0 44	0 36	0 16	0 31	0 45	0 28
tig00000650	1591606	TAT	CAC	45 0	36 0	46 0	45 0	65 0	45 0	45 0	40 0	37 0	48 0	27 0	7 0	13 0	44 0	14 0	44 0	44 0	15 0	35 0	0 8	14 0	18 0	11 0	14 0	38 0	16 25	21 0	10 0	13 0	14 0	0 46	0 39	0 13	0 2	0 0	0 0	0 60	0 36	0 46	0 31	0 39	0 34	0 16	0 32	0 32	0 27
tig00000650	1591660	T	A	0 17	0 6	0 18	0 20	0 29	0 16	0 19	0 17	0 10	0 22	0 10	0 3	0 6	0 18	0 2	0 15	0 13	0 6	0 11	0 11	0 8	0 7	0 7	0 6	0 12	0 16	0 12	0 4	0 5	0 5	0 29	9 18	6 8	0 1	0 0	0 0	0 50	0 46	0 35	0 25	0 33	0 27	0 12	0 23	0 31	0 26
tig00000650	1591663	G	A	0 15	0 5	0 13	0 17	0 28	0 13	0 16	0 16	0 10	0 19	0 9	0 1	0 5	0 14	0 2	0 13	0 13	0 5	0 10	0 11	0 7	0 7	0 7	0 6	0 10	0 14	0 10	0 3	0 5	0 4	0 28	0 24	0 14	0 1	0 0	0 0	0 51	0 46	0 36	0 26	0 33	0 30	0 14	0 22	0 32	0 26
tig00000650	1591674	T	A	0 9	0 3	0 8	0 10	0 20	0 4	0 10	0 9	0 8	0 14	0 7	0 1	0 3	0 4	0 1	0 9	0 8	0 3	0 9	0 11	0 5	0 4	0 6	0 3	0 7	0 7	0 6	0 1	0 4	0 1	0 25	0 19	0 14	0 1	0 0	0 0	0 46	0 44	0 32	0 23	0 29	0 29	0 12	0 22	0 34	0 25
tig00000650	1591695	C	T	0 0	0 0	0 0	0 0	0 0	0 0	0 0	0 0	0 0	0 0	0 0	0 0	0 0	0 0	0 0	0 0	0 0	0 0	0 0	0 12	0 0	0 0	0 0	0 0	0 0	0 3	0 0	0 0	0 0	0 1	0 26	0 19	0 14	0 1	0 0	0 0	0 43	0 40	0 29	0 25	0 19	0 27	0 16	0 18	0 32	0 26
tig00000650	1591705	G	A	0 0	0 0	0 0	0 0	0 0	0 0	0 0	0 0	0 0	0 0	0 0	0 0	0 0	0 0	0 0	0 0	0 0	0 0	0 0	0 12	0 0	0 0	0 0	0 0	0 0	0 0	0 0	0 0	0 0	0 1	11 20	0 22	0 14	0 0	0 0	0 0	0 44	0 44	0 27	0 25	0 19	0 26	0 13	0 16	0 31	0 26
tig00000650	1591716	T	C	0 0	0 0	0 0	0 0	0 0	0 0	0 0	0 0	0 0	0 0	0 0	0 0	0 0	0 0	0 0	0 0	0 0	0 0	0 0	0 12	0 0	0 0	0 0	0 0	0 0	0 0	0 0	0 0	0 0	1 0	32 0	18 0	13 0	0 0	0 0	0 0	0 43	0 46	0 23	0 25	0 19	0 24	0 15	0 15	0 31	0 29
tig00000650	1591730	A	G	0 0	0 0	0 0	0 0	0 0	0 0	0 0	0 0	0 0	0 0	0 0	0 0	0 0	0 0	0 0	0 0	0 0	0 0	0 0	0 10	0 0	0 0	0 0	0 0	0 0	0 0	0 0	0 0	0 0	1 0	0 33	0 19	0 12	0 0	0 0	0 0	0 40	0 49	0 23	0 26	0 25	0 23	0 21	0 15	0 33	0 28
tig00000650	1591733	C	G	0 0	0 0	0 0	0 0	0 0	0 0	0 0	0 0	0 0	0 0	0 0	0 0	0 0	0 0	0 0	0 0	0 0	0 0	0 0	0 10	0 0	0 0	0 0	0 0	0 0	0 0	0 0	0 0	0 0	0 1	0 34	0 20	0 12	0 0	0 0	0 0	0 43	0 49	12 11	0 22	0 23	0 24	0 22	0 14	0 34	0 28
tig00000650	1591744	G	GTAC	0 0	0 0	0 0	0 0	0 0	0 0	0 0	0 0	0 0	0 0	0 0	0 0	0 0	0 0	0 0	0 0	0 0	0 0	0 0	0 8	0 0	0 0	0 0	0 0	0 0	0 0	0 0	0 0	0 0	0 1	17 13	7 7	7 5	0 0	0 0	0 0	0 38	0 49	0 19	0 24	0 27	0 25	0 23	0 22	0 30	0 26
tig00000650	1591755	A	C	3 0	0 0	0 0	0 0	2 0	3 0	2 0	0 0	0 0	2 0	0 0	0 0	0 0	2 0	0 0	1 0	0 0	1 0	1 0	0 9	0 0	1 0	0 0	0 0	3 0	0 0	0 0	1 0	0 0	0 0	32 0	17 0	12 0	0 0	0 0	0 0	37 0	48 0	18 0	24 0	26 0	27 0	24 0	18 0	34 0	38 0
tig00000650	1591765	C	A	0 9	0 5	0 5	0 3	0 9	0 10	0 4	0 4	0 7	0 9	0 2	0 3	0 1	0 6	0 1	0 4	0 8	0 5	0 4	0 9	0 0	0 6	0 4	0 0	0 9	0 0	0 1	0 1	0 2	0 4	0 34	0 18	0 11	0 0	0 0	0 0	0 36	0 45	0 15	0 23	0 28	0 26	0 22	0 18	0 33	0 34
tig00000650	1591779	T	C	0 13	0 11	0 13	0 16	0 23	0 15	0 10	0 11	0 13	0 15	0 2	0 5	0 3	0 12	0 3	0 10	0 11	0 7	0 8	0 8	0 3	0 8	0 8	0 4	0 17	0 6	0 3	0 2	0 3	0 7	0 38	0 21	0 12	0 0	0 0	0 0	0 42	0 41	0 13	0 26	0 32	0 29	0 22	0 20	0 30	0 37
tig00000650	1591781	AG	A	0 13	0 11	0 13	0 16	0 24	0 15	0 11	0 12	0 15	0 15	0 3	0 5	0 3	0 12	0 3	0 10	0 13	0 8	0 8	0 6	0 5	0 9	0 8	0 4	0 18	0 8	0 5	0 3	0 4	0 7	0 37	0 19	0 12	0 0	0 0	0 0	0 41	0 36	0 12	0 24	0 31	0 29	0 22	0 20	0 29	0 37
tig00000650	1591798	G	A	0 19	0 17	0 26	0 20	0 38	0 24	0 25	0 27	0 23	0 18	0 10	0 7	0 7	0 23	0 5	0 18	0 24	0 11	0 20	0 5	0 10	0 15	0 9	0 7	0 31	0 14	0 6	0 4	0 5	0 8	0 40	0 31	0 12	0 0	0 0	0 0	0 44	0 39	0 15	0 30	0 32	0 31	0 29	0 17	0 33	0 39
tig00000650	1591809	T	A	0 27	0 22	0 31	0 25	0 49	0 35	0 31	0 37	0 32	0 23	0 17	0 8	0 9	0 31	0 9	0 23	0 34	0 16	0 28	0 6	0 13	0 15	0 13	0 10	0 33	0 20	0 8	0 8	0 9	0 9	0 48	0 41	0 9	0 0	0 0	0 0	0 45	0 40	0 19	0 30	0 36	0 29	0 26	0 19	0 31	0 40
tig00000650	1591825	TAA	CAG	0 33	0 28	0 35	0 35	0 60	0 47	0 39	0 42	0 40	0 40	0 26	0 11	0 10	0 43	0 14	0 35	0 44	0 21	0 33	0 5	0 17	0 20	0 20	0 17	0 48	0 27	0 16	0 12	0 10	0 12	0 55	0 50	0 11	0 0	0 0	0 0	0 0	0 0	0 0	0 14	0 0	0 0	0 0	0 0	0 0	0 0
tig00000650	1591826	A	G	0 33	0 28	0 35	0 35	0 60	0 47	0 39	0 42	0 40	0 40	0 26	0 11	0 10	0 43	0 14	0 35	0 44	0 21	0 33	0 5	0 17	0 20	0 20	0 17	0 48	0 27	0 16	0 12	0 10	0 12	0 55	0 50	0 11	0 0	0 0	0 0	50 0	35 0	19 0	18 14	36 0	32 0	30 0	23 0	34 0	43 0
tig00000650	1591836	A	C	0 36	0 36	0 39	0 42	0 70	0 59	0 41	0 45	0 51	0 45	0 28	0 11	0 11	0 49	0 14	0 39	0 48	0 22	0 36	0 5	0 18	0 22	0 24	0 17	0 50	0 31	0 16	0 12	0 13	0 13	0 54	0 53	0 11	0 0	0 0	0 0	0 49	0 40	0 24	0 32	0 39	0 32	0 30	0 24	0 38	0 41
tig00000650	1591847	G	A	0 46	0 48	0 45	0 46	0 76	0 65	0 50	0 52	0 58	0 51	0 31	0 12	0 14	0 53	0 19	0 42	0 54	0 24	0 42	0 5	0 19	0 22	0 26	0 20	0 56	0 35	0 21	0 14	0 17	0 15	0 56	0 58	0 11	0 0	0 0	0 0	50 0	42 0	21 0	15 12	41 0	32 0	33 0	23 0	40 0	43 0
tig00000650	1591848	A	G	0 48	0 48	0 44	0 46	0 79	0 65	0 51	0 53	0 59	0 51	0 32	0 12	0 14	0 54	0 20	0 42	0 55	0 24	0 44	0 5	0 19	0 22	0 26	0 21	0 56	0 35	0 21	0 14	0 17	0 15	27 30	30 30	7 4	0 0	0 0	0 0	0 49	0 36	0 18	0 26	0 39	0 30	0 31	0 21	0 38	0 40
tig00000650	1591855	C	G	0 46	0 47	0 44	0 50	0 81	0 66	0 49	0 55	0 60	0 55	0 37	0 12	0 15	0 54	0 24	0 41	0 57	0 23	0 42	0 5	0 20	0 21	0 27	0 20	0 55	0 37	0 24	0 14	0 19	0 15	0 57	0 63	0 10	0 0	0 0	0 0	0 53	0 39	0 21	0 25	0 41	0 30	0 34	0 24	0 39	0 44
tig00000650	1591866	C	A	0 39	0 43	0 41	0 46	0 70	0 59	0 47	0 51	0 55	0 48	0 34	0 8	0 14	0 50	0 22	0 39	1 47	0 19	0 43	0 6	0 19	0 16	0 24	0 20	0 46	0 36	0 24	0 14	0 17	0 13	0 57	0 62	0 11	0 0	0 0	0 0	0 47	0 38	0 19	0 22	0 45	0 30	0 33	0 25	20 13	15 26
tig00000650	1591884	G	A	33 0	32 0	26 0	33 0	53 0	50 0	37 0	41 0	42 0	42 0	30 0	4 0	10 0	42 0	19 0	32 0	35 0	16 0	36 0	0 5	13 0	12 0	19 0	15 0	32 0	26 0	18 0	11 0	14 0	8 0	24 0	23 0	4 0	0 0	0 0	0 0	35 0	30 0	18 0	19 0	33 0	24 0	25 0	15 0	27 0	35 0
tig00000650	1591884	GCC	ACT	0 0	0 0	0 0	0 0	0 0	0 0	0 0	0 0	0 0	0 0	0 0	0 0	0 0	0 0	0 0	0 0	0 0	0 0	0 0	0 5	0 0	0 0	0 0	0 0	0 0	0 0	0 0	0 0	0 0	0 0	19 0	22 0	7 0	0 0	0 0	0 0	0 0	0 0	0 0	0 0	0 0	0 0	0 0	0 0	0 0	0 0
tig00000650	1591910	CT	C	0 15	0 17	0 10	0 17	0 26	0 22	0 16	0 14	0 24	0 19	0 11	0 2	0 5	0 16	0 8	0 7	0 14	0 4	0 12	0 6	0 6	0 3	0 9	0 6	0 13	0 4	0 10	0 4	0 8	0 3	0 20	0 19	0 8	0 0	0 0	0 0	26 0	21 0	14 0	8 6	19 0	17 0	21 0	10 0	19 0	16 0
tig00000650	1591918	CAAA	TCAAT	0 15	0 17	0 10	0 17	0 26	0 22	0 16	0 14	0 24	0 19	0 11	0 2	0 5	0 16	0 8	0 7	0 14	0 4	0 12	0 6	0 6	0 3	0 9	0 6	0 13	0 4	0 10	0 4	0 8	0 3	0 20	0 19	0 8	0 0	0 0	0 0	0 0	0 0	0 0	0 6	0 0	0 0	0 0	0 0	0 0	0 0
tig00000650	1591926	C	T	0 15	0 16	0 9	0 15	0 22	0 18	0 15	0 13	0 19	0 17	0 9	0 1	0 4	0 13	0 8	0 9	0 13	0 2	0 13	0 6	0 4	0 2	0 4	0 5	0 10	0 7	0 9	0 3	0 8	0 3	0 19	0 17	0 7	0 0	0 0	0 0	28 0	22 0	14 0	9 5	22 0	14 0	20 0	11 0	20 0	16 0
tig00000650	1591932	A	T	0 13	0 11	0 7	0 11	0 13	0 12	0 11	0 10	0 16	0 13	0 8	0 1	0 4	0 9	0 8	0 9	0 12	0 2	0 10	0 6	0 3	0 1	0 3	0 4	0 8	0 7	0 9	0 3	0 6	0 3	0 15	0 11	0 7	0 0	0 0	0 0	0 20	0 21	0 13	0 11	0 22	0 12	0 21	0 10	11 8	2 13
tig00000650	1591941	G	GTATTC	0 0	0 0	0 0	0 0	0 0	0 0	0 0	0 0	0 0	0 0	0 0	0 0	0 0	0 0	0 0	0 0	0 0	0 0	0 0	0 5	0 0	0 0	0 0	0 0	0 0	0 0	0 0	0 0	0 0	0 0	1 0	1 0	6 0	0 0	0 0	0 0	10 0	15 0	7 0	5 0	12 0	8 0	14 0	6 0	13 0	10 0
tig00000650	1591991	A	C	0 0	0 0	0 0	0 0	0 0	0 0	0 0	0 0	0 0	0 0	0 0	0 0	0 0	0 0	0 0	0 0	0 0	0 0	0 0	0 11	0 0	0 0	0 0	0 0	0 0	0 0	0 0	0 0	0 0	0 0	0 8	0 6	0 3	0 0	0 0	0 0	0 25	0 16	0 9	0 19	0 27	0 8	0 10	0 7	0 10	0 19
tig00000650	1591991	A	G	0 0	0 0	0 0	0 0	0 0	0 0	0 0	0 0	0 0	0 0	0 0	0 0	0 0	0 0	0 0	0 0	0 0	0 0	0 0	0 11	0 0	0 0	0 0	0 0	0 0	0 0	0 0	0 0	0 0	0 0	13 8	8 6	4 3	0 0	0 0	0 0	0 25	0 16	0 9	0 19	0 27	0 8	0 10	0 7	0 10	0 19
tig00000650	1591994	T	C	0 0	0 0	0 0	0 0	0 0	0 0	0 0	0 0	0 0	0 0	0 0	0 0	0 0	0 0	0 0	0 0	0 0	0 0	0 0	0 10	0 0	0 0	0 0	0 0	0 0	0 0	0 0	0 0	0 0	0 0	8 13	0 14	0 6	0 0	0 0	0 0	0 25	0 16	0 10	0 21	0 27	0 11	0 11	0 10	0 13	0 19
tig00000650	1592014	A	G	0 0	0 0	0 0	0 0	0 0	0 0	0 0	0 0	0 0	0 0	0 0	0 0	0 0	0 0	0 0	0 0	0 0	0 0	0 0	0 12	0 0	0 0	0 0	0 0	0 0	0 0	0 0	0 0	0 0	0 0	0 21	0 14	0 4	0 0	0 0	0 0	23 0	15 0	14 0	13 10	21 0	14 0	10 0	9 0	17 0	20 0
tig00000650	1592024	C	T	0 0	0 0	0 0	0 0	0 0	0 0	0 0	0 0	0 0	0 0	0 0	0 0	0 0	0 0	0 0	0 0	0 0	0 0	0 0	0 11	0 0	0 0	0 0	0 0	0 0	0 0	0 0	0 0	0 0	0 0	0 21	0 14	0 4	0 0	0 0	0 0	25 0	19 0	16 0	12 12	24 0	18 0	8 0	11 0	19 0	21 0
tig00000650	1592050	C	CA	0 0	0 0	0 0	0 0	0 0	0 0	0 0	0 0	0 0	0 0	0 0	0 0	0 0	0 0	0 0	0 0	0 0	0 0	0 0	0 13	0 0	0 0	0 0	0 0	0 0	0 0	0 0	0 0	0 0	0 0	3 4	2 1	4 0	0 0	0 0	0 0	0 30	0 22	0 21	0 27	0 28	0 25	0 19	0 13	0 25	0 27
tig00000650	1592153	G	A	0 49	0 34	0 48	0 31	0 55	0 52	0 46	0 31	0 41	0 33	0 25	0 3	0 15	0 50	0 19	0 21	0 42	0 21	0 30	0 16	0 16	0 9	0 15	0 16	0 47	0 21	0 17	0 13	0 22	0 13	0 22	0 8	0 10	0 0	0 0	0 0	33 0	27 0	30 0	6 17	31 0	47 0	33 0	23 0	35 0	24 0
tig00000650	1592160	A	G	0 56	0 38	0 53	0 32	0 58	0 57	0 51	0 32	0 46	0 36	0 27	0 5	0 16	0 54	0 21	0 22	0 48	0 23	0 30	0 17	0 18	0 8	0 18	0 18	0 52	0 25	0 18	0 18	0 23	0 13	0 23	1 9	0 9	0 0	0 0	0 0	0 34	0 30	0 30	0 23	0 34	0 47	0 33	0 23	0 33	0 23
tig00000650	1592168	C	T	0 60	0 36	0 55	0 31	0 64	0 58	0 51	0 35	0 46	0 36	0 28	0 6	0 18	0 57	0 25	0 22	0 47	0 28	0 36	0 17	0 19	0 10	0 15	0 20	0 50	0 24	0 18	0 18	0 28	0 11	18 11	12 2	10 0	0 0	0 0	0 0	0 35	0 30	0 31	0 22	0 35	0 52	0 34	0 24	0 35	0 22
tig00000650	1592180	A	T	0 59	0 38	0 55	0 30	0 67	0 65	0 47	0 36	0 46	0 41	0 31	0 6	0 18	0 62	0 25	0 24	0 48	0 28	0 39	0 17	0 18	0 11	0 17	0 19	0 52	12 11	0 21	0 17	0 31	0 9	0 31	0 23	0 10	0 0	0 0	0 0	0 34	0 29	0 31	0 23	0 32	0 57	0 30	0 21	0 33	0 26
tig00000650	1592182	T	C	0 58	0 37	0 56	0 31	0 67	0 63	0 44	0 36	0 45	0 42	0 30	0 6	0 18	0 64	0 25	0 24	0 47	0 27	0 40	0 16	0 19	0 13	0 17	0 19	0 52	0 21	0 21	0 20	0 30	0 9	0 32	0 24	0 10	0 0	0 0	0 0	0 38	0 30	0 32	0 23	0 34	0 56	0 29	0 23	0 33	0 27
tig00000650	1592188	A	T	0 58	0 35	0 56	0 33	0 61	0 65	0 44	0 38	0 48	0 38	0 29	0 6	0 18	0 61	0 26	0 24	0 48	0 25	0 40	0 18	0 17	0 14	0 18	0 19	0 50	0 26	0 19	0 19	0 31	0 9	0 33	7 18	0 10	0 0	0 0	0 0	0 37	0 31	0 34	0 26	0 33	0 63	0 29	0 23	0 36	0 29
tig00000650	1592213	G	C	0 59	0 42	0 50	0 39	0 69	0 63	0 42	0 41	0 50	0 43	0 30	0 8	0 22	0 57	0 25	0 33	0 52	0 27	0 44	0 20	0 16	0 20	0 21	0 17	0 51	0 41	0 20	0 23	0 32	0 11	0 42	0 42	0 10	0 0	0 0	0 0	0 35	0 31	0 38	0 26	0 35	0 59	0 33	0 25	0 39	0 33
tig00000650	1592219	G	A	0 59	0 42	0 49	0 40	0 70	0 60	0 41	1 46	0 46	0 37	0 29	0 9	0 23	0 54	0 24	0 34	0 53	0 28	0 46	0 20	0 19	0 18	0 22	0 17	0 53	0 45	0 20	0 22	0 32	0 11	17 23	19 25	0 10	0 0	0 0	0 0	0 36	0 33	0 39	0 27	0 35	0 59	0 32	0 25	0 38	0 32
tig00000650	1592247	G	T	0 51	0 40	0 49	0 43	0 70	0 61	1 40	0 48	0 49	0 41	0 30	0 8	0 21	0 49	0 24	0 39	0 50	0 27	25 22	0 15	0 25	0 21	0 24	0 16	0 54	0 48	0 21	0 23	0 33	0 9	19 14	25 25	11 0	0 0	0 0	0 0	0 38	0 31	0 42	0 27	0 30	0 50	0 35	0 24	0 41	0 36
tig00000650	1592251	T	C	0 49	0 41	0 48	20 21	0 70	0 62	0 43	0 49	0 50	0 41	0 30	0 8	0 21	0 51	0 22	0 38	0 51	0 26	0 48	0 14	0 26	0 27	0 25	0 16	0 52	0 47	0 21	0 23	0 31	0 10	0 31	0 48	0 11	0 0	0 0	0 0	0 44	0 32	0 43	0 24	0 30	0 47	0 37	0 22	0 43	0 36
tig00000650	1592273	G	A	0 40	0 43	0 47	1 52	0 65	0 61	0 42	0 55	0 44	0 40	0 28	0 6	0 21	0 52	0 27	0 37	0 52	0 28	0 52	0 15	0 26	0 26	0 28	0 15	0 54	0 47	0 21	0 22	0 29	0 13	11 11	0 39	0 10	0 0	0 0	0 0	0 40	0 33	0 44	0 24	0 34	0 45	0 37	0 22	0 44	0 37
tig00000650	1592297	C	T	0 34	0 44	0 54	0 54	0 61	0 57	0 41	0 61	0 47	0 48	0 24	0 8	0 23	0 48	0 23	0 34	0 52	0 25	17 33	0 13	0 30	0 23	0 29	0 22	0 57	0 49	0 21	0 16	0 29	0 16	3 3	8 15	10 0	0 0	0 0	0 0	0 41	0 31	0 44	0 21	0 31	0 49	0 30	0 15	0 41	0 38
tig00000650	1592323	A	T	0 29	0 47	0 49	0 49	0 69	0 54	0 46	0 59	0 51	0 51	0 22	0 5	0 18	0 54	0 21	0 33	0 48	0 20	0 50	0 10	0 22	0 24	0 31	0 22	0 50	0 36	0 22	0 15	0 31	0 14	0 7	0 12	0 9	0 0	0 0	0 0	0 48	0 31	0 50	9 15	0 31	0 44	0 27	0 16	0 45	0 39
tig00000650	1592326	GT	AG	0 29	0 46	0 46	0 51	0 69	0 52	0 46	0 61	0 51	0 49	0 21	0 6	0 17	0 57	0 20	0 33	0 47	0 21	0 51	0 9	0 23	0 24	0 31	0 21	0 51	0 35	0 21	0 15	0 30	0 14	0 6	0 11	0 9	0 0	0 0	0 0	0 49	0 30	0 50	0 24	0 32	0 46	0 29	0 17	0 45	0 32
tig00000650	1592378	C	T	0 34	0 26	0 33	0 36	0 51	0 32	0 36	0 46	0 47	0 40	0 19	0 3	0 13	0 54	0 15	0 25	0 38	0 20	0 39	0 9	0 18	0 16	0 24	0 19	0 39	0 34	0 15	0 9	0 26	0 11	0 11	0 8	0 4	0 0	0 0	0 0	0 45	0 26	0 43	10 13	0 34	0 36	0 22	0 19	0 42	0 31
tig00000650	1592399	CA	C	0 26	0 16	0 21	0 20	0 35	0 18	0 24	0 30	0 36	0 24	0 13	0 3	0 5	0 36	0 13	0 19	0 20	0 14	0 31	0 5	0 13	0 12	0 19	0 10	0 30	0 24	0 10	0 7	0 17	0 6	6 2	5 0	3 0	0 0	0 0	0 0	0 33	0 21	0 39	0 26	0 17	0 33	0 9	0 21	0 29	0 32
tig00000650	1592402	T	C	0 26	0 16	0 21	0 20	0 35	0 18	0 24	0 30	0 36	0 24	0 13	0 3	0 5	0 36	0 13	0 19	0 20	0 14	0 31	0 5	0 13	0 12	0 19	0 10	0 30	0 24	0 10	0 7	0 17	0 6	0 2	0 0	0 0	0 0	0 0	0 0	0 33	0 21	0 39	0 26	11 17	0 33	10 9	0 21	0 29	0 32
tig00000650	1592426	A	C	11 8	3 2	12 0	9 0	18 0	6 0	11 0	13 0	21 0	11 0	7 0	0 0	3 0	7 15	6 4	5 8	12 0	5 3	4 11	0 7	8 0	6 0	7 3	2 3	18 0	5 10	5 0	4 0	11 0	1 2	0 5	0 5	0 3	0 0	0 0	0 0	0 36	0 18	0 48	0 26	0 33	0 34	0 22	0 20	0 30	0 31
tig00000650	1592448	G	GGCTT	0 4	0 1	0 4	0 2	0 4	0 2	0 3	0 1	0 4	0 2	0 1	0 0	0 0	0 3	0 3	0 3	0 1	0 1	0 8	0 7	0 2	0 0	0 1	0 0	0 5	0 5	0 0	0 0	0 4	0 0	0 0	0 0	0 3	0 0	0 0	0 0	0 39	0 18	0 39	4 13	0 37	0 38	0 21	0 18	0 29	0 35
tig00000650	1592474	T	C	0 0	0 0	0 0	0 0	0 0	0 0	0 0	0 0	0 0	0 0	0 0	0 0	0 0	0 0	0 0	0 0	0 0	0 0	0 4	0 7	0 0	0 0	0 0	0 0	0 0	0 0	0 0	0 0	0 0	0 0	0 0	0 0	0 2	0 0	0 0	0 0	0 32	0 19	0 41	0 19	14 21	0 41	13 13	0 21	0 29	0 35
tig00000650	1592489	C	T	0 0	0 0	0 0	0 0	0 0	0 0	0 0	0 0	0 0	0 0	0 0	0 0	0 0	0 0	0 0	0 0	0 0	0 0	0 0	0 8	0 0	0 0	0 0	0 0	0 0	0 0	0 0	0 0	0 0	0 0	0 0	0 0	2 0	0 0	0 0	0 0	34 0	18 0	34 0	18 0	32 0	39 0	24 0	24 0	32 0	41 0
tig00000650	1592502	A	T	0 0	0 0	0 0	0 0	0 0	0 0	0 0	0 0	0 0	0 0	0 0	0 0	0 0	0 0	0 0	0 0	0 0	0 0	0 0	0 8	0 0	0 0	0 0	0 0	0 0	0 0	0 0	0 0	0 0	0 0	0 0	0 0	0 0	0 0	0 0	0 0	0 0	0 0	0 0	0 0	0 0	0 0	0 0	0 0	0 0	0 0
tig00000650	1592502	ATCT	TTCA	0 0	0 0	0 0	0 0	0 0	0 0	0 0	0 0	0 0	0 0	0 0	0 0	0 0	0 0	0 0	0 0	0 0	0 0	0 0	0 8	0 0	0 0	0 0	0 0	0 0	0 0	0 0	0 0	0 0	0 0	0 0	0 0	0 0	0 0	0 0	0 0	36 0	17 0	31 0	15 0	33 0	39 0	25 0	23 0	32 0	39 0
tig00000650	1592558	C	T	0 0	0 0	0 0	0 0	0 0	0 0	0 0	0 0	0 0	0 0	0 0	0 0	0 0	0 0	0 0	0 0	0 0	0 0	0 12	0 9	0 0	0 0	0 0	0 0	0 0	0 0	0 0	0 0	0 0	0 0	0 14	0 8	0 0	0 0	0 0	0 0	0 43	0 29	0 34	8 8	0 39	0 47	0 38	0 29	0 43	0 46
tig00000650	1592598	T	C	0 2	0 2	0 5	0 5	0 2	0 7	0 5	0 7	0 2	0 4	0 0	0 2	0 2	0 7	0 2	0 0	0 5	0 0	0 17	0 11	0 1	0 0	0 2	0 2	0 7	0 4	0 0	0 2	0 0	0 0	15 2	9 5	0 1	0 0	0 0	0 0	0 43	0 37	0 31	0 20	0 36	0 48	0 38	0 28	0 47	0 42
tig00000650	1592610	T	A	0 2	0 2	0 5	0 5	0 2	0 7	0 5	0 7	0 2	0 4	0 0	0 2	0 2	0 7	0 2	0 0	0 5	0 0	0 15	0 10	0 1	0 0	0 2	0 2	0 7	0 4	0 0	0 2	0 0	0 0	0 13	0 15	0 1	0 0	0 0	0 0	0 45	1 35	0 34	16 7	0 37	0 49	0 33	0 28	0 49	0 45
tig00000650	1592618	GTTTTTCCTTTTTTTTTTCC	AAAAGTTTTTCCTTTTTTTT	0 0	0 0	0 0	0 0	0 0	0 0	0 0	0 0	0 0	0 0	0 0	0 0	0 0	0 0	0 0	0 0	0 0	0 0	0 0	0 8	0 0	0 0	0 0	0 0	0 0	0 0	0 0	0 0	0 0	0 0	0 0	0 0	0 0	0 0	0 0	0 0	0 0	0 0	0 0	0 15	0 0	0 0	0 0	0 0	0 0	0 0
tig00000650	1592618	GTTTTTCCTTTTTTTTTTCC	AAAAGTTTTTCCTTTTTTTTT	0 0	0 0	0 0	0 0	0 0	0 0	0 0	0 0	0 0	0 0	0 0	0 0	0 0	0 0	0 0	0 0	0 0	0 0	0 0	0 8	0 0	0 0	0 0	0 0	0 0	0 0	0 0	0 0	0 0	0 0	3 0	5 0	0 0	0 0	0 0	0 0	0 0	0 0	0 0	0 15	0 0	0 0	0 0	0 0	0 0	0 0
tig00000650	1592618	GTTTTTCCTTTTT	G	0 0	0 0	0 0	0 0	0 0	0 0	0 0	0 0	0 0	0 0	0 0	0 0	0 0	0 0	0 0	0 0	0 0	0 0	5 0	0 8	0 0	0 0	0 0	0 0	0 0	0 0	0 0	0 0	0 0	0 0	0 0	0 0	0 0	0 0	0 0	0 0	24 0	23 0	18 0	6 15	21 0	31 0	21 0	13 0	33 0	30 0
tig00000650	1592657	ATTTTCTAGT	A	0 0	0 2	0 0	0 1	0 0	0 2	0 0	0 1	0 0	0 0	0 0	0 0	0 0	0 0	0 0	0 0	0 1	0 0	0 6	0 6	0 0	0 0	0 0	0 0	0 0	0 0	0 2	0 1	0 0	0 1	0 0	3 0	0 0	0 0	0 0	0 0	0 35	0 28	0 29	0 22	0 26	0 39	0 30	0 19	0 44	0 30
tig00000650	1592670	T	C	0 0	0 2	0 0	0 1	0 0	0 2	0 0	0 1	0 0	0 0	0 0	0 0	0 0	0 0	0 0	0 0	0 1	0 0	0 6	0 6	0 0	0 0	0 0	0 0	0 0	0 0	0 2	0 1	0 0	0 1	0 0	0 0	0 0	0 0	0 0	0 0	0 35	0 28	0 29	0 22	0 26	0 39	0 30	0 19	0 44	0 30
tig00000650	1592681	T	A	0 0	0 0	0 0	1 0	0 0	0 0	0 0	1 0	0 0	0 0	0 0	0 0	0 0	0 0	0 0	0 0	0 0	0 0	0 6	0 8	0 0	0 0	0 0	0 0	0 0	0 0	0 0	0 0	0 0	0 1	0 0	3 0	0 0	0 0	0 0	0 0	0 38	0 31	0 32	0 22	0 28	0 44	0 33	0 21	0 53	0 32
tig00000650	1592686	T	A	0 0	0 0	0 0	0 0	0 0	0 0	0 0	0 0	0 0	0 0	0 0	0 0	0 0	0 0	0 0	0 0	0 0	0 0	0 7	0 7	0 0	0 0	0 0	0 0	0 0	0 0	0 0	0 0	0 0	0 0	0 0	0 3	0 0	0 0	0 0	0 0	0 37	0 31	0 31	0 23	0 31	0 45	0 31	0 20	0 52	0 31
tig00000650	1592687	A	C	0 0	0 0	0 0	0 0	0 0	0 0	0 0	0 0	0 0	0 0	0 0	0 0	0 0	0 0	0 0	0 0	0 0	0 0	7 0	0 8	0 0	0 0	0 0	0 0	0 0	0 0	0 0	0 0	0 0	0 0	0 0	0 3	0 0	0 0	0 0	0 0	36 0	31 0	30 0	8 13	29 0	46 0	29 0	20 0	50 0	32 0
tig00000650	1592695	G	T	0 0	0 0	0 0	0 0	0 0	0 0	0 0	0 0	0 0	0 0	0 0	0 0	0 0	0 0	0 0	0 0	0 0	0 0	0 8	1 7	0 0	0 0	0 0	0 0	0 0	0 0	0 0	0 0	0 0	0 0	0 0	0 3	0 0	0 0	0 0	0 0	40 0	29 0	32 0	8 13	31 0	47 0	31 0	23 0	52 0	34 0
tig00000650	1592700	C	T	0 0	1 0	0 0	0 0	0 0	0 0	0 0	0 0	0 0	0 0	0 0	0 0	0 0	0 0	0 0	0 0	0 0	0 0	7 0	0 8	0 0	0 0	0 0	0 0	0 0	0 0	0 0	0 0	0 0	0 0	0 0	3 0	0 0	0 0	0 0	0 0	38 0	32 0	30 0	19 0	35 0	43 0	29 0	19 0	52 0	36 0
tig00000650	1592719	G	C	0 0	0 1	0 1	0 0	0 0	0 0	0 0	0 0	0 1	0 0	0 0	0 0	0 0	0 0	0 0	0 0	0 0	0 0	0 9	0 9	0 0	0 0	0 0	0 0	0 0	0 1	0 0	0 0	0 0	0 0	0 2	0 2	0 0	0 0	0 0	0 0	0 29	0 35	0 23	0 12	0 34	0 40	0 21	0 21	0 48	0 33
tig00000650	1592734	A	T	0 0	0 1	0 1	0 0	0 0	0 0	0 0	0 0	0 1	0 0	0 0	0 0	0 0	0 0	0 0	0 0	0 0	0 0	0 12	0 9	0 0	0 0	0 0	0 0	0 0	0 1	0 0	0 0	0 0	0 0	0 3	0 4	0 0	0 0	0 0	0 0	0 31	0 29	0 20	6 5	0 32	0 39	0 26	0 20	0 44	0 32
tig00000650	1592764	T	TTA	0 0	0 0	0 0	0 0	0 0	0 0	0 0	0 0	0 0	0 0	0 0	0 0	0 0	0 0	0 0	0 0	0 0	0 0	0 18	0 10	0 0	0 0	0 0	0 0	0 0	0 0	0 0	0 0	0 0	0 0	3 0	3 0	0 0	0 0	0 0	0 0	0 29	0 27	0 19	3 8	0 32	0 30	0 26	0 22	0 37	0 32
tig00000650	1592822	T	A	0 0	0 0	0 0	0 0	0 0	0 0	0 0	0 0	0 0	0 0	0 0	0 0	0 0	0 0	0 0	0 0	0 0	0 0	12 0	0 9	0 0	0 0	0 0	0 0	0 0	0 0	0 0	0 0	0 0	0 0	0 0	0 0	0 0	0 0	0 0	0 0	0 0	0 0	0 0	0 0	0 0	0 0	0 0	0 0	0 0	0 0
tig00000650	1592822	T	G	0 0	0 0	0 0	0 0	0 0	0 0	0 0	0 0	0 0	0 0	0 0	0 0	0 0	0 0	0 0	0 0	0 0	0 0	0 0	0 9	0 0	0 0	0 0	0 0	0 0	0 0	0 0	0 0	0 0	0 0	0 0	0 0	0 0	0 0	0 0	0 0	31 0	25 0	9 0	9 0	30 0	22 0	20 0	25 0	20 0	26 0
tig00000650	1592872	T	C	0 5	0 3	0 2	0 4	0 2	0 2	0 4	0 2	0 5	0 3	0 3	0 1	0 0	0 4	0 2	0 4	0 6	0 1	0 15	0 5	0 1	0 0	0 2	0 1	0 9	0 1	0 0	0 2	0 1	0 1	0 0	0 0	0 0	0 0	0 0	0 0	0 32	0 12	0 9	5 7	0 19	0 22	0 11	0 23	0 16	0 14
tig00000650	1592882	T	G	0 5	0 3	0 2	0 4	0 2	0 2	0 4	0 2	0 5	0 3	0 3	0 1	0 0	0 4	0 2	0 4	0 6	0 1	0 17	0 6	0 1	0 0	0 2	0 1	0 9	0 1	0 0	0 2	0 1	0 1	0 0	0 0	0 0	0 0	0 0	0 0	0 28	0 13	0 8	5 7	0 19	0 20	0 12	0 23	0 15	0 10
tig00000650	1592911	T	C	0 0	0 0	0 0	0 0	0 0	0 0	0 0	0 0	0 0	0 0	0 0	0 0	0 0	0 0	0 0	0 0	0 0	0 0	13 0	0 5	0 0	0 0	0 0	0 0	0 0	0 0	0 0	0 0	0 0	0 0	0 0	0 0	0 0	0 0	0 0	0 0	18 0	8 0	5 0	6 0	16 0	13 0	8 0	17 0	12 0	5 0
tig00000650	1592962	A	G	0 0	0 2	0 0	0 1	0 2	0 0	0 1	0 0	0 1	0 0	0 0	0 0	0 0	0 1	0 0	0 0	0 1	0 0	0 7	0 6	0 0	0 1	0 0	0 0	0 0	0 0	0 0	0 0	0 0	0 1	0 0	0 1	0 0	0 0	0 0	0 0	0 9	0 2	0 2	0 4	0 6	0 6	0 5	0 10	0 7	0 5
tig00000650	1592993	T	A	0 0	0 0	0 0	0 0	0 0	0 0	1 0	0 0	0 0	0 0	0 0	0 0	0 0	0 0	0 1	0 0	0 0	0 0	0 0	0 6	0 0	0 0	0 0	0 0	0 0	0 0	0 0	0 0	0 0	0 0	0 0	0 0	0 0	0 0	0 0	0 0	0 0	0 0	0 0	0 0	0 0	1 0	0 0	1 0	2 0	0 0
tig00000650	1593060	T	C	0 0	2 0	0 0	1 0	0 0	0 0	2 0	1 0	2 0	0 0	0 0	0 1	0 0	1 0	0 2	2 0	0 0	1 0	1 1	0 4	0 0	1 0	0 0	0 0	0 0	0 0	0 0	2 0	1 0	2 0	0 0	0 0	0 0	0 0	0 0	0 0	0 0	0 0	0 0	0 0	0 0	0 0	0 0	0 0	0 1	0 0
tig00000650	1593060	TT	CG	1 0	0 0	0 0	2 0	4 0	2 0	1 0	1 0	0 0	0 0	1 0	0 1	0 0	0 0	1 2	0 0	2 0	0 0	0 1	0 4	0 0	1 0	0 0	0 0	0 0	0 0	0 0	0 0	0 0	0 0	0 0	0 0	0 0	0 0	0 0	0 0	0 0	0 0	0 0	0 0	0 0	0 0	0 0	0 0	0 1	0 0
tig00000650	1593084	CA	TC	0 0	0 0	0 0	0 0	0 0	0 0	0 0	0 0	0 0	0 0	0 1	0 1	0 0	0 0	0 3	0 0	0 0	8 0	0 1	0 5	1 0	2 0	0 0	2 0	0 0	0 0	0 0	2 0	4 0	5 0	0 0	0 0	0 0	0 0	0 0	0 0	0 0	0 0	0 0	0 0	0 0	0 0	0 0	0 0	0 3	0 0
tig00000650	1593085	A	C	25 0	6 0	11 0	11 0	19 0	21 0	5 0	9 0	0 0	14 0	3 1	1 1	10 0	10 0	11 3	0 0	15 0	0 0	12 1	0 5	8 0	5 0	6 0	3 0	6 0	7 0	9 0	1 0	3 0	2 0	0 0	0 0	0 0	0 0	0 0	0 0	0 0	2 0	0 0	0 0	3 0	0 0	0 0	0 0	0 3	1 0
tig00000650	1593085	A	T	0 0	18 0	0 0	9 0	0 0	0 0	16 0	6 0	29 0	0 0	3 1	0 1	0 0	12 0	1 3	27 0	0 0	0 0	8 1	0 5	0 0	0 0	0 0	0 0	6 0	9 0	0 0	0 0	0 0	0 0	0 0	0 0	0 0	0 0	0 0	0 0	0 0	0 0	0 0	0 0	0 0	0 0	0 0	0 0	0 3	0 0
tig00000650	1593103	G	A	29 0	20 0	16 0	21 0	21 0	9 0	23 0	9 0	33 0	17 0	3 0	1 0	8 0	25 0	12 0	28 0	0 0	11 0	21 0	0 0	10 0	7 0	8 0	3 0	18 0	20 0	13 0	3 0	5 0	6 0	0 0	0 0	0 0	0 0	0 0	0 0	0 0	0 0	0 0	0 0	0 0	0 0	0 0	0 0	0 0	0 0
tig00000650	1593103	GACCAC	AACCAT	0 0	0 0	0 0	0 0	0 0	8 0	0 0	0 0	0 0	0 0	0 0	0 0	0 0	0 0	0 0	0 0	8 0	0 0	0 0	0 0	0 0	0 0	0 0	0 0	0 0	0 0	0 0	0 0	0 0	0 0	0 0	0 0	0 0	0 0	0 0	0 0	0 0	0 0	0 0	0 0	0 0	0 0	0 0	0 0	0 0	0 0
tig00000650	1593103	GA	AG	0 0	0 0	0 0	0 0	0 0	0 0	0 0	3 0	0 0	0 0	1 0	0 0	0 0	0 0	0 0	0 0	0 0	0 0	0 0	4 0	0 0	0 0	0 0	0 0	0 0	0 0	0 0	0 0	0 0	0 0	0 0	0 0	0 0	0 0	0 0	0 0	0 0	0 0	0 0	0 0	0 0	0 0	0 0	0 0	0 0	0 0
tig00000650	1593123	A	T	0 59	0 31	0 37	0 40	0 49	0 30	0 43	0 40	0 55	0 40	0 18	0 5	0 14	0 55	0 22	0 43	0 54	0 16	0 34	0 8	0 16	0 8	0 19	0 13	0 30	0 48	0 22	0 11	0 8	0 9	0 4	0 3	0 1	0 0	0 0	0 0	0 7	0 9	0 1	0 0	0 6	0 3	0 3	0 1	0 6	0 0
tig00000650	1593134	G	T	0 53	0 29	1 36	0 38	0 51	0 31	0 41	0 37	0 50	0 36	3 19	1 4	10 3	0 53	7 15	0 42	0 49	0 16	0 31	0 8	0 16	0 8	5 16	2 10	0 31	0 48	4 19	2 10	2 5	2 6	0 4	0 4	0 1	0 1	0 0	0 0	0 7	0 9	0 1	0 3	0 5	0 3	0 4	0 1	0 10	0 0
tig00000650	1593139	C	T	0 62	0 25	0 38	0 37	0 52	0 29	0 39	0 48	0 51	0 48	0 23	0 6	0 14	0 53	0 22	0 40	0 55	0 16	0 29	0 6	0 16	0 8	0 21	0 12	0 33	0 46	0 23	0 10	0 8	0 8	0 4	2 6	0 1	1 0	0 0	0 0	0 7	0 11	0 3	0 3	0 9	0 3	0 4	0 4	0 12	0 1
tig00000650	1593143	T	A	28 31	15 7	15 21	18 19	20 30	7 8	17 15	11 28	23 22	15 28	3 8	1 5	9 1	17 28	11 8	20 11	0 40	0 5	16 9	0 6	4 3	5 1	8 6	2 6	15 19	17 30	13 9	1 7	2 1	2 0	0 4	3 4	0 1	0 1	0 0	0 0	0 7	2 9	3 0	3 1	6 2	0 3	1 1	1 3	4 7	0 0
tig00000650	1593143	TTTG	ACTA	0 31	0 7	0 21	0 19	0 30	0 8	0 15	0 28	0 22	0 28	0 8	0 5	0 1	0 28	0 8	0 11	0 40	10 5	0 9	0 6	2 3	1 1	0 6	2 6	0 19	0 30	0 9	0 7	2 1	4 0	0 4	0 4	0 1	0 1	0 0	0 0	0 7	0 9	0 0	0 1	0 2	0 3	0 1	0 3	0 7	0 0
tig00000650	1593149	G	A	0 60	0 24	0 41	0 36	0 55	0 26	0 34	0 50	0 48	0 48	0 23	0 5	0 15	0 48	0 21	0 37	0 55	0 17	0 28	0 6	0 11	0 7	0 22	0 14	0 35	0 48	0 23	0 10	0 6	0 5	0 4	0 8	0 1	0 1	0 0	0 0	0 9	0 11	3 2	0 4	6 3	0 5	0 4	1 5	0 12	0 1
tig00000650	1593158	C	T	0 55	0 19	0 43	0 26	0 49	0 20	0 23	0 50	0 42	0 45	2 17	1 4	7 5	0 44	5 9	0 32	0 53	0 16	0 21	0 5	0 10	0 5	4 17	2 12	0 32	0 47	3 17	1 7	1 4	0 5	0 4	2 6	0 1	0 1	0 0	0 1	4 5	1 10	2 4	1 3	1 7	0 5	0 4	2 4	2 11	0 1
tig00000650	1593160	G	A	0 53	3 17	0 43	0 27	0 50	7 13	0 29	0 49	0 42	0 47	0 22	0 5	0 12	0 43	0 14	0 31	0 53	0 16	0 19	0 5	0 10	0 5	0 21	0 12	0 31	0 48	0 20	0 9	1 5	0 4	0 4	6 2	0 1	0 1	0 0	0 1	0 9	2 9	0 6	3 1	0 8	0 5	1 3	0 8	4 9	0 1
tig00000650	1593164	C	T	0 46	0 13	0 40	0 22	0 45	0 14	0 24	0 45	0 35	0 38	0 19	0 4	0 7	0 39	0 9	0 26	0 47	0 5	0 15	0 5	0 6	0 3	0 15	0 10	0 29	0 40	0 12	0 7	0 2	0 0	0 3	0 6	0 1	0 1	0 0	0 1	0 9	0 11	0 6	0 4	0 9	0 5	0 4	0 8	0 13	0 1
tig00000650	1593167	G	T	0 46	0 13	0 40	0 22	0 45	0 14	0 24	0 45	0 35	0 38	0 19	0 4	0 7	0 39	0 9	0 26	0 47	8 5	0 15	0 5	2 6	0 3	0 15	1 10	0 29	0 40	0 12	0 7	2 2	2 0	0 3	0 6	0 1	0 1	0 0	0 1	0 9	0 11	0 6	0 4	0 9	0 5	0 4	0 8	0 13	0 1
tig00000650	1593181	G	A	12 31	0 10	0 38	0 20	0 36	0 9	0 21	3 38	6 26	17 21	0 14	0 4	1 4	0 37	0 8	0 23	5 40	0 10	0 12	0 7	0 4	0 1	0 16	0 9	0 27	3 33	0 15	0 9	0 2	0 2	0 3	0 6	0 1	0 1	0 0	0 1	0 9	0 11	0 6	0 4	0 9	0 5	0 4	0 8	0 13	0 1
tig00000650	1593189	ATAT	A	6 0	1 0	6 0	7 0	6 0	1 0	1 0	6 0	1 0	4 0	1 0	0 0	0 0	14 0	4 0	6 0	7 0	1 0	2 0	0 7	3 0	0 0	1 0	5 0	3 0	9 0	3 0	1 0	0 0	0 0	0 0	0 0	0 0	1 0	0 0	1 0	5 0	8 0	0 0	1 0	0 0	4 0	1 0	2 0	2 0	0 0
tig00000650	1593208	C	T	6 18	2 6	1 24	7 7	9 15	1 3	2 2	10 21	1 20	0 20	3 3	1 2	1 2	10 18	1 5	7 10	15 10	2 5	1 4	0 7	1 4	0 0	5 5	1 3	3 17	9 13	5 4	4 1	1 0	0 0	0 0	0 2	0 0	0 0	0 0	0 1	4 5	8 3	4 2	0 4	6 2	5 0	1 3	4 4	1 12	1 0
tig00000650	1593210	G	T	0 20	0 7	0 24	0 9	0 20	0 4	0 5	0 30	0 20	0 20	0 6	0 3	0 3	0 24	0 5	0 16	0 20	0 6	0 3	0 7	0 4	0 0	0 10	0 4	0 19	0 20	0 8	0 3	0 1	0 0	0 0	0 2	0 0	0 0	0 0	0 1	0 9	0 11	0 6	0 4	0 7	0 5	0 4	0 8	0 13	0 1
tig00000650	1593222	T	C	0 3	0 4	0 3	0 3	0 5	0 2	0 1	0 5	0 9	0 4	0 1	0 1	0 1	0 2	0 1	0 5	0 4	1 2	0 2	0 6	0 2	0 0	0 1	0 0	0 2	0 6	0 2	0 0	0 0	0 0	0 0	0 0	0 0	0 0	0 0	0 0	0 0	0 0	0 0	0 0	0 0	0 0	0 2	3 0	0 1	0 0
tig00000650	1593298	GCAGTGTGTGT	ACAGTGTGTGTGA	0 0	0 0	0 0	0 0	0 0	0 0	0 0	0 0	0 0	0 0	0 0	0 0	0 0	0 0	0 0	0 0	0 0	0 0	0 0	0 3	0 0	0 0	0 0	0 0	0 0	0 0	0 0	0 0	0 0	0 0	0 0	0 0	0 0	0 0	0 0	0 0	2 0	0 0	0 0	0 0	0 0	0 0	0 0	2 0	0 0	0 0
tig00000650	1593299	CAGTGTGTGT	TAGTGTATGA	0 0	0 0	0 0	0 0	0 0	0 0	0 0	0 0	0 0	0 0	0 0	0 0	0 0	0 0	0 0	0 0	0 0	0 0	0 0	0 3	0 0	0 0	0 0	0 0	0 0	0 0	0 0	0 0	0 0	0 0	0 0	0 0	0 0	0 0	0 0	0 0	0 0	0 0	0 0	0 0	0 0	0 0	1 0	0 0	0 0	0 0
tig00000650	1593305	GTGT	ATGA	1 0	0 0	0 0	0 0	0 0	2 0	0 0	0 0	0 0	0 0	0 0	1 0	0 0	0 0	2 0	0 0	0 0	0 0	5 0	0 3	1 0	0 0	2 0	0 0	0 0	0 0	0 0	1 0	0 0	2 0	0 0	0 0	0 0	0 0	0 0	0 0	0 0	2 0	0 0	2 0	6 0	1 0	1 0	1 0	4 0	1 0
tig00000650	1593308	T	TGA	0 0	0 0	0 0	0 0	0 0	0 0	0 0	0 0	0 0	0 0	0 0	0 0	0 0	0 0	0 0	0 0	0 0	0 0	0 0	0 3	0 0	0 0	0 0	0 0	0 0	0 0	0 0	0 0	0 0	0 0	0 0	0 0	0 0	0 0	0 0	0 0	0 0	1 0	4 0	5 0	0 0	0 0	2 0	0 0	1 0	3 0
tig00000650	1593317	G	A	0 5	0 2	0 5	0 2	0 4	0 19	0 1	1 1	0 2	0 7	0 0	0 3	0 3	0 0	0 5	0 1	0 1	0 1	0 29	0 3	0 4	0 0	0 7	0 2	0 3	0 3	0 0	0 4	0 0	0 6	0 2	4 21	0 3	1 0	1 0	0 0	2 10	6 4	2 19	3 14	1 19	1 22	1 5	0 18	10 9	0 11
tig00000650	1593320	G	T	0 5	0 2	0 7	0 3	0 6	0 21	0 2	0 6	0 4	0 7	0 3	0 3	0 3	0 0	0 6	0 4	0 1	0 1	0 29	0 4	0 4	0 0	0 11	0 5	0 3	0 3	0 7	0 4	0 0	0 7	0 3	0 26	0 4	0 1	0 1	0 0	4 9	3 6	8 10	10 7	4 18	20 3	4 3	7 11	4 17	7 4
tig00000650	1593322	A	T	3 0	0 1	0 7	0 3	0 7	15 5	0 2	0 6	0 4	0 7	0 3	2 1	0 3	0 0	4 1	0 4	0 1	0 1	22 0	0 4	4 0	0 0	4 6	0 5	0 3	0 3	0 7	3 1	0 0	3 2	0 3	7 1	0 4	1 0	1 0	0 8	1 11	4 5	4 15	2 15	10 7	3 21	2 6	2 14	7 12	1 9
tig00000650	1593331	G	C	0 5	0 2	0 7	0 3	0 7	0 25	0 2	0 6	0 4	0 7	0 3	0 3	0 3	0 0	0 6	0 4	0 1	0 2	0 31	0 4	0 4	0 0	0 11	0 6	0 3	0 3	0 7	0 4	0 0	0 7	0 4	0 18	0 0	0 1	0 1	0 8	0 10	0 10	5 16	0 18	0 23	0 26	0 9	0 18	6 18	0 12
tig00000650	1593335	AG	GT	0 5	0 4	0 7	0 3	0 7	0 29	0 2	0 6	0 4	0 7	0 3	0 4	0 3	0 0	0 6	0 4	0 1	0 2	0 35	0 4	0 4	0 0	0 12	0 8	0 3	0 3	0 8	0 5	0 0	0 7	0 4	0 28	0 4	0 1	0 1	0 8	0 15	0 15	0 38	0 25	0 25	0 29	0 13	0 21	0 27	0 16
tig00000650	1593355	T	C	0 5	0 9	0 7	0 3	0 7	0 36	0 3	0 6	0 4	0 7	0 3	0 4	0 3	0 0	0 6	0 4	0 1	0 2	0 38	0 4	0 4	0 0	0 13	0 8	0 3	0 4	0 8	0 5	0 0	0 7	0 3	0 29	0 5	0 1	0 2	0 8	0 12	0 19	0 41	0 22	0 26	11 10	0 13	0 12	0 36	0 13
tig00000650	1593356	G	A	0 5	0 9	0 7	0 3	0 7	0 36	0 3	0 6	0 4	0 7	0 3	0 4	0 3	0 0	0 6	0 4	0 1	0 2	0 38	0 4	0 4	0 0	0 13	0 8	0 3	0 4	0 8	0 5	0 0	0 7	0 3	0 29	0 5	0 1	0 2	0 8	4 12	3 19	0 41	4 22	1 26	2 10	3 13	9 12	0 36	4 13
tig00000650	1593359	T	C	0 5	0 9	0 7	0 3	0 7	0 36	0 3	0 6	0 4	0 7	0 3	0 4	0 3	0 0	0 6	0 4	0 1	0 2	0 38	0 4	0 4	0 0	0 12	0 8	0 3	0 4	0 8	0 5	0 0	0 7	0 4	0 29	0 5	0 1	2 0	0 8	0 17	0 23	0 42	0 24	0 26	0 28	0 16	0 19	0 36	0 17
tig00000650	1593361	G	A	0 5	0 9	0 7	0 3	0 7	0 36	0 2	5 1	0 4	0 7	3 0	0 4	0 3	0 0	0 6	0 4	0 1	0 2	0 38	0 5	0 4	0 0	4 9	3 5	0 3	0 4	5 3	0 5	0 0	1 6	0 4	13 16	0 5	1 0	0 2	0 8	0 17	0 22	0 43	0 21	0 27	0 28	3 12	0 21	0 29	0 16
tig00000650	1593366	C	T	0 5	0 8	0 5	0 2	0 5	0 38	0 2	0 1	0 2	0 7	0 0	0 4	0 3	0 0	0 5	0 1	0 1	0 2	0 38	0 5	0 4	0 0	0 9	0 4	0 3	0 3	0 4	0 4	0 0	0 6	0 4	0 29	0 4	0 1	0 2	0 8	4 10	4 17	4 25	1 26	1 18	2 19	0 18	0 20	0 33	0 13
tig00000650	1593367	C	G	0 5	0 8	0 5	0 2	0 5	0 38	0 2	0 1	0 2	0 7	0 0	0 4	0 3	0 0	0 5	0 1	0 1	0 2	0 38	0 5	0 4	0 0	0 9	0 4	0 3	0 3	0 4	0 4	0 0	0 6	0 4	0 29	0 4	0 1	0 2	0 8	4 10	3 17	13 25	0 26	7 18	5 19	0 18	1 20	4 33	0 13
tig00000650	1593367	C	T	0 5	1 8	2 5	1 2	2 5	2 38	0 2	0 1	2 2	0 7	3 0	0 4	0 3	0 0	0 5	3 1	0 1	0 2	0 38	0 5	0 4	0 0	0 9	1 4	0 3	1 3	5 4	1 4	0 0	0 6	0 4	0 29	0 4	0 1	0 2	0 8	0 10	0 17	0 25	0 26	0 18	0 19	0 18	0 20	0 33	0 13
tig00000650	1593391	TGACTTCTTCCA	GGAACTCTACCG	0 0	0 0	0 0	0 0	0 0	0 0	0 0	0 0	0 0	0 0	0 0	0 0	0 0	0 0	0 0	0 0	0 0	0 0	0 0	0 4	0 0	0 0	0 0	0 0	0 0	0 0	0 0	0 0	0 0	0 0	0 0	0 0	0 0	0 0	0 0	0 0	4 0	4 0	6 0	8 0	3 0	1 0	2 0	6 0	0 0	4 0
tig00000650	1593426	C	T	0 10	0 2	0 3	0 2	0 2	0 17	0 0	0 3	0 13	0 5	0 2	0 3	0 1	0 9	0 0	0 8	0 10	0 2	0 3	0 3	0 1	0 1	0 1	0 3	0 3	0 5	0 1	0 2	0 3	0 0	0 0	0 2	0 0	0 1	0 1	0 0	0 17	0 21	12 28	0 26	0 27	0 19	0 16	0 16	6 16	0 17
tig00000650	1593427	CACG	TATA	0 10	0 2	0 3	0 2	0 2	0 17	0 0	0 3	0 13	0 5	0 2	0 3	0 1	0 9	0 0	0 8	0 10	0 2	0 3	0 3	0 1	0 1	0 1	0 3	0 3	0 5	0 1	0 2	0 3	0 0	0 0	0 2	0 0	0 1	0 1	5 0	0 17	0 21	0 28	0 26	0 27	0 19	0 16	0 16	0 16	0 17
tig00000650	1593436	T	A	0 10	3 2	0 7	0 6	0 3	0 13	0 0	0 3	0 4	0 3	0 4	0 2	0 1	0 8	0 0	0 8	0 7	0 2	0 0	0 4	0 1	0 0	0 0	0 1	0 5	0 4	0 3	0 2	0 5	0 0	0 0	0 2	0 4	0 1	0 0	5 0	0 15	0 21	0 38	0 24	0 27	0 14	0 15	0 15	0 37	0 16
tig00000650	1593440	G	A	0 9	0 5	0 8	0 6	0 4	5 6	0 0	0 3	1 13	0 7	1 3	0 2	0 1	0 9	0 0	0 8	0 10	1 1	0 0	0 4	0 1	0 1	0 0	0 1	0 8	0 6	0 4	2 0	1 3	0 0	0 0	0 2	0 4	1 0	0 0	0 8	0 14	0 21	0 36	0 21	2 23	0 14	0 15	0 14	0 36	0 15
tig00000650	1593442	GTC	G	0 9	0 5	0 8	0 6	0 5	0 7	0 0	0 1	0 13	0 6	0 4	0 2	0 1	0 8	0 0	0 8	0 6	0 1	0 0	0 4	0 1	0 2	0 0	0 1	0 5	0 7	0 4	0 2	0 5	0 0	0 0	0 2	4 0	0 1	0 0	0 8	0 13	0 21	0 35	0 20	0 21	0 10	0 13	0 12	0 33	0 10
tig00000650	1593444	C	T	0 9	0 5	0 8	0 6	0 5	0 7	0 0	0 1	1 13	0 6	0 4	0 2	0 1	0 8	0 0	0 8	0 6	0 1	0 0	0 4	0 1	0 2	0 0	0 1	0 5	0 7	0 4	0 2	0 5	0 0	0 0	0 2	0 0	0 1	0 0	0 8	0 13	0 21	0 35	0 20	0 21	1 10	0 13	0 12	0 33	0 10
tig00000650	1593450	G	A	0 9	0 3	0 8	0 6	1 4	0 9	0 0	0 3	10 4	4 3	0 4	0 2	0 1	0 9	0 0	0 8	0 10	1 1	0 0	0 5	0 1	1 1	0 0	0 1	0 8	1 6	0 4	0 2	0 5	0 0	0 0	0 4	0 4	0 1	0 0	0 8	0 11	0 19	0 35	0 15	0 21	0 12	0 12	0 11	0 34	0 10
tig00000650	1593453	C	T	1 8	0 2	7 1	6 0	3 2	2 5	0 0	0 3	4 10	2 5	2 2	2 0	1 0	8 1	0 0	8 0	6 4	0 2	0 0	0 5	0 1	1 1	0 0	1 0	5 3	6 1	3 1	0 2	4 1	0 0	0 0	0 4	0 4	0 1	0 0	0 8	0 11	2 16	0 31	3 12	0 18	0 12	1 7	0 10	4 29	0 9
tig00000650	1593458	CCTCA	ACTCC	0 8	0 0	0 0	0 0	0 0	0 0	0 0	0 0	0 1	0 0	0 0	0 0	0 0	0 1	0 0	0 0	0 4	0 1	0 0	0 6	0 0	0 0	0 0	0 0	0 3	0 0	0 0	0 0	0 0	0 0	0 0	0 0	0 0	0 1	0 0	0 0	1 0	2 0	5 0	2 0	2 0	2 0	0 0	1 0	3 6	2 0
tig00000650	1593462	A	C	1 8	0 0	2 0	5 0	2 0	2 0	0 0	0 0	3 1	3 0	2 0	2 0	1 0	8 1	0 0	5 0	4 4	0 1	0 0	0 6	1 0	0 0	0 0	1 0	3 3	4 0	2 0	0 0	2 0	0 0	0 0	0 0	0 0	0 1	0 0	0 0	1 0	1 0	4 0	4 0	4 0	2 0	2 0	0 0	3 6	1 0
tig00000650	1593472	C	T	1 9	0 2	3 0	5 0	2 1	2 1	0 1	1 1	2 11	1 5	3 1	2 0	1 0	8 0	0 0	7 0	5 0	0 2	0 0	0 6	0 1	0 1	0 0	1 0	3 0	4 1	2 0	0 2	2 1	0 0	0 0	0 2	0 1	0 1	0 0	0 0	0 2	0 5	0 5	0 8	0 6	0 1	0 4	0 0	0 8	0 0
tig00000650	1593497	C	T	1 0	0 0	4 0	4 0	0 0	2 2	0 0	0 2	4 0	0 1	2 1	2 0	1 0	8 0	0 0	8 2	6 1	0 1	0 0	0 8	0 0	1 0	0 0	1 0	0 0	6 0	3 0	0 2	4 1	0 0	0 0	0 9	0 0	0 0	0 0	0 0	0 0	0 0	0 0	0 0	0 0	0 0	0 0	0 0	2 0	0 0
tig00000650	1593544	C	T	0 0	0 0	0 0	0 0	0 0	0 0	0 0	0 0	0 0	0 0	0 0	0 0	0 1	0 0	0 0	0 0	0 0	0 0	0 0	0 9	0 0	0 0	0 0	0 1	0 0	0 0	0 0	0 0	0 0	0 0	0 1	0 8	0 0	0 0	1 0	0 0	0 0	0 0	0 0	0 0	0 0	0 0	0 0	0 0	0 1	0 0
tig00000650	1593549	C	A	0 0	0 0	0 0	0 0	0 0	0 0	0 0	0 0	0 0	0 0	0 0	0 0	0 1	0 0	0 0	0 0	0 0	0 0	0 0	0 10	0 0	0 0	0 0	0 1	0 0	0 0	0 0	0 0	0 0	0 0	0 1	0 8	0 0	0 0	0 2	0 0	0 0	0 1	0 1	0 0	0 0	0 0	0 0	0 0	0 1	0 0
tig00000650	1593551	C	T	0 0	0 0	0 0	0 0	0 0	0 0	0 0	0 0	0 0	0 0	0 0	0 0	0 1	0 0	0 0	0 0	0 0	0 0	0 0	0 9	0 0	0 0	0 0	0 1	0 0	0 0	0 0	0 0	0 0	0 0	1 0	1 6	0 0	0 0	2 0	0 0	0 0	0 0	1 0	0 0	0 0	0 0	0 0	0 0	1 0	0 0
tig00000650	1593578	G	T	0 0	0 0	0 0	0 0	0 0	0 0	0 0	0 0	0 0	0 0	0 0	0 0	0 1	0 0	0 0	0 0	0 0	0 0	0 0	0 9	0 0	0 0	0 0	0 1	0 0	0 0	0 0	0 0	0 0	0 0	0 1	0 6	0 0	0 0	0 2	0 0	0 0	0 1	0 1	0 0	0 0	0 0	0 0	0 0	0 1	0 0
tig00000650	1593588	A	G	0 0	0 0	0 0	0 0	0 0	0 0	0 0	0 0	0 0	0 0	0 0	0 0	0 1	0 0	0 0	0 0	0 0	0 0	0 0	0 8	0 0	0 0	0 0	0 1	0 0	0 0	0 0	0 0	0 0	0 0	0 1	3 4	0 0	0 0	0 2	0 0	0 0	0 1	0 1	0 0	0 0	0 0	0 0	0 0	0 1	0 0
tig00000650	1593608	ATTA	TTTG	0 0	0 0	0 0	0 0	0 0	0 0	0 0	0 0	0 0	0 0	0 0	0 0	0 0	0 0	0 0	0 0	0 0	0 0	0 0	0 9	0 0	0 0	0 0	0 0	0 0	0 0	0 0	0 0	0 0	0 0	0 0	0 0	0 0	0 0	2 0	0 0	0 0	1 0	0 0	0 0	0 0	0 0	0 0	0 0	1 0	0 0
tig00000650	1593648	CTT	AC	0 0	0 0	0 0	0 0	0 0	0 0	0 0	0 0	0 0	0 0	0 0	0 0	0 0	0 0	0 0	0 0	0 0	0 0	0 0	8 0	0 0	0 0	0 0	0 0	0 0	0 0	0 0	0 0	0 0	0 0	0 0	0 0	0 0	0 0	0 0	0 0	0 0	0 0	0 0	0 0	0 0	0 0	0 0	0 0	0 0	0 0
tig00000650	1593700	GT	AC	0 0	0 0	0 0	0 0	0 0	0 0	0 0	0 0	0 3	0 0	0 0	0 0	0 0	0 0	0 0	0 0	0 0	0 0	0 0	0 10	0 0	0 0	0 0	0 0	0 0	0 0	0 0	0 0	0 0	0 0	8 0	0 0	0 0	0 0	0 0	0 0	0 0	0 0	0 0	0 0	0 0	0 0	0 0	0 0	0 0	0 0
tig00000650	1593701	T	C	0 0	0 0	0 0	0 0	0 0	0 0	0 0	0 0	0 3	0 0	0 0	0 0	0 0	0 0	0 0	0 0	0 0	0 0	0 0	0 10	0 0	0 0	0 0	0 0	0 0	0 0	0 0	0 0	0 0	0 0	0 0	0 0	0 0	0 0	0 0	0 0	0 0	0 0	0 0	0 0	0 0	0 0	0 0	0 0	0 0	0 0
tig00000650	1593707	T	G	0 0	0 0	0 0	0 0	0 0	0 0	0 0	0 0	0 0	0 0	0 0	0 0	0 0	0 0	0 0	0 0	0 0	0 0	0 0	0 11	0 0	0 0	0 0	0 0	0 0	0 0	0 0	0 0	0 0	0 0	0 8	0 0	0 0	0 0	0 0	0 0	0 0	0 0	0 0	0 0	0 0	0 0	0 0	0 0	0 0	0 0
tig00000650	1593753	T	C	0 13	0 7	0 2	0 9	0 4	0 13	0 4	0 4	0 1	0 13	0 9	0 1	0 5	0 7	0 0	0 0	0 6	0 5	0 13	0 10	0 4	0 1	0 2	0 6	0 1	0 3	0 3	0 0	0 1	0 4	0 1	0 4	0 0	0 0	0 0	0 0	0 2	0 5	0 2	0 1	0 3	0 0	0 3	0 3	0 3	0 3
tig00000650	1593755	T	C	0 11	0 7	0 1	0 8	0 4	0 13	0 4	0 0	0 0	0 5	0 9	0 1	0 5	0 6	0 0	0 0	0 6	0 5	0 11	0 10	0 4	0 1	0 1	2 3	0 1	1 3	0 3	0 0	0 1	0 4	0 1	0 4	0 0	0 0	0 0	0 0	1 0	0 0	1 0	0 0	0 3	0 0	0 0	1 0	3 0	3 0
tig00000650	1593760	A	T	0 11	0 7	0 1	0 8	0 4	0 13	0 4	0 0	0 0	0 5	0 9	0 1	0 5	0 6	0 0	0 0	0 6	0 5	0 11	0 10	0 4	0 1	0 1	0 3	0 1	0 3	0 3	0 0	0 1	0 4	0 1	0 4	0 0	0 0	0 0	0 0	0 0	0 0	0 0	0 0	0 3	0 0	0 0	0 0	0 0	0 0
tig00000650	1593766	GCT	ACA	0 5	0 6	0 2	0 4	0 4	0 9	0 4	0 4	0 1	0 13	0 8	0 0	0 5	0 7	0 0	0 0	0 6	0 3	0 9	0 9	0 2	0 0	0 1	0 0	0 0	0 3	0 2	0 0	0 1	0 2	0 0	0 0	0 0	0 0	0 0	0 0	0 0	0 3	0 1	0 1	0 3	0 0	0 0	0 2	0 3	0 3
tig00000650	1593776	C	A	0 5	0 6	0 2	0 4	0 4	0 9	0 4	0 4	0 1	0 13	0 8	0 0	0 5	0 7	0 0	0 0	0 6	0 3	0 9	0 9	0 2	0 0	0 1	0 0	0 0	0 3	0 2	0 0	0 1	0 2	0 0	0 0	0 0	0 0	0 0	0 0	0 0	0 3	0 1	0 1	0 3	0 0	0 0	0 2	0 3	0 3
tig00000650	1593778	C	A	0 5	0 6	0 2	0 4	0 4	0 9	0 4	0 4	0 1	0 13	0 8	0 0	0 5	0 7	0 0	0 0	0 6	0 3	0 9	0 9	0 2	0 0	0 1	0 0	0 0	0 3	0 2	0 0	0 1	0 2	0 0	0 0	0 0	0 0	0 0	0 0	0 0	0 3	0 1	0 1	0 3	0 0	0 0	0 2	0 3	0 3
tig00000650	1593793	T	C	0 8	0 0	0 1	0 0	0 0	0 0	0 0	0 3	0 1	0 8	0 0	0 0	0 0	0 0	0 0	0 0	0 0	0 0	0 1	0 12	0 0	0 0	0 1	0 3	0 0	1 0	0 0	0 0	0 0	0 0	0 0	0 5	0 0	0 0	0 0	0 0	0 0	0 2	0 0	0 1	0 0	0 0	0 4	0 1	0 0	0 0
tig00000650	1593793	TCGAC	CCGAT	0 8	0 0	0 1	0 0	0 0	0 0	0 0	0 3	0 1	0 8	0 0	0 0	0 0	0 0	0 0	0 0	0 0	0 0	0 1	0 12	0 0	0 0	0 1	0 3	0 0	0 0	0 0	0 0	0 0	0 0	0 0	0 5	0 0	0 0	0 0	0 0	0 0	2 2	1 0	0 1	0 0	0 0	0 4	0 1	3 0	3 0
tig00000650	1593819	GGATG	TGATA	0 5	0 0	0 1	0 0	0 0	0 0	0 0	0 0	0 0	0 0	0 0	0 0	0 0	0 0	0 0	0 0	0 0	0 0	0 1	0 8	0 0	0 0	0 1	0 3	0 0	0 0	0 0	0 0	0 0	0 0	0 0	0 3	0 0	0 0	0 0	0 0	0 0	0 2	0 0	0 1	0 0	0 0	0 0	0 1	0 0	0 0
tig00000650	1593882	CAGC	TAG	0 0	0 2	0 0	0 0	0 0	0 0	0 2	0 1	0 0	0 1	0 2	0 0	0 0	0 0	0 2	0 2	0 0	0 0	0 0	0 8	0 0	0 0	0 0	0 1	0 2	0 0	0 0	0 0	0 0	0 2	0 0	0 0	0 0	0 0	0 0	0 0	0 0	0 0	0 0	0 0	0 0	0 0	0 0	0 0	0 0	0 0
tig00000650	1593927	C	G	0 0	0 0	0 0	0 0	0 0	0 0	0 0	0 0	0 0	0 0	0 0	0 0	0 0	0 0	0 0	0 0	0 0	0 0	0 0	0 4	0 0	0 0	0 0	0 0	0 0	0 0	0 0	0 0	0 0	0 0	1 0	0 0	3 0	0 0	0 0	0 0	0 0	0 0	0 1	0 0	0 0	0 2	0 0	0 0	0 0	0 0
tig00000650	1593938	A	G	0 0	0 0	0 0	0 0	0 0	0 0	0 0	0 0	0 0	0 0	0 0	0 0	0 0	0 0	0 0	0 0	0 0	0 0	0 0	0 4	0 0	0 0	0 0	0 0	0 0	0 0	0 0	0 0	0 0	0 1	0 1	0 0	0 3	0 0	0 0	0 0	0 0	0 0	0 1	0 0	0 0	0 2	0 0	0 0	0 0	0 0
tig00000650	1593988	GGCC	AGGCCA	0 0	0 0	0 0	0 0	0 0	0 0	0 0	0 0	0 0	0 0	0 0	0 0	0 0	0 0	0 0	0 0	0 0	0 0	0 0	4 0	0 0	0 0	0 0	0 0	0 0	0 0	0 0	0 0	0 0	0 0	0 0	0 0	0 0	0 0	0 0	0 0	0 0	0 0	0 0	0 0	0 0	0 0	0 0	0 0	0 0	0 0
tig00000650	1594019	C	T	0 0	0 4	0 1	0 2	0 1	0 3	0 0	0 0	0 5	0 1	0 1	0 0	0 1	0 0	0 0	0 0	0 0	0 5	0 3	0 8	0 1	0 0	0 3	0 8	0 0	0 1	0 2	0 2	0 2	0 0	14 66	6 96	0 3	0 0	0 1	0 0	0 0	0 0	0 2	0 1	0 2	0 1	0 2	0 0	0 0	0 0
tig00000650	1594024	A	G	0 0	0 4	0 1	0 2	0 1	0 3	0 0	0 0	0 5	0 1	0 1	0 0	0 1	0 0	0 0	0 0	0 0	0 5	0 3	0 9	0 1	0 0	0 3	0 8	0 0	0 1	0 2	0 2	0 2	0 0	3 93	2 115	0 3	0 0	0 1	0 0	0 0	0 0	0 2	0 1	0 2	0 1	0 2	0 0	0 0	0 0
tig00000650	1594036	T	C	0 0	0 4	0 1	0 2	0 1	0 3	0 0	0 0	0 5	0 1	0 1	0 0	0 1	0 0	0 0	0 0	0 0	0 5	1 3	0 10	0 1	0 0	0 3	0 8	0 0	0 1	0 2	0 2	0 2	0 0	31 67	70 68	2 0	0 0	0 1	0 0	0 0	0 0	0 2	0 0	0 2	0 1	0 2	0 0	0 0	0 0
tig00000650	1594058	T	A	0 0	0 4	0 1	0 2	0 1	0 3	0 0	0 0	0 5	0 1	0 1	0 0	0 1	0 0	0 0	0 0	0 0	0 5	0 6	0 12	0 1	0 0	0 4	0 8	0 0	0 1	0 2	0 2	0 2	0 0	0 110	0 156	0 2	0 0	0 1	0 0	0 0	0 0	0 2	0 1	0 2	0 0	0 2	0 0	0 0	0 0
tig00000650	1594106	A	G	0 0	0 0	0 0	0 0	0 0	0 0	0 0	0 0	0 0	0 0	0 0	0 0	0 0	0 0	0 0	0 0	0 0	0 0	0 3	0 9	0 0	0 0	0 1	0 0	0 0	0 0	0 0	0 0	0 0	0 0	5 1	8 11	0 0	0 0	0 0	0 0	0 0	0 0	0 0	0 0	0 0	0 0	0 0	0 0	0 0	0 0
tig00000650	1594121	A	G	0 0	0 0	0 0	0 0	0 0	0 0	0 0	0 0	0 0	0 0	0 0	0 0	0 0	0 0	0 0	0 0	0 0	0 0	0 0	0 9	0 0	0 0	0 0	0 0	0 0	0 0	0 0	0 0	0 0	0 0	1 0	0 0	0 0	0 0	0 0	0 0	0 0	0 0	1 0	0 0	1 0	0 0	2 0	0 0	0 0	0 0
tig00000650	1594151	T	C	0 0	0 0	0 0	0 0	0 0	0 0	0 0	0 0	0 0	0 0	0 0	0 0	0 0	0 0	0 0	0 0	0 0	0 0	0 0	0 7	0 0	0 0	0 0	0 0	0 0	0 0	0 0	0 0	0 0	0 0	0 0	6 0	0 0	0 0	0 0	0 0	0 0	0 0	0 0	0 0	0 0	0 0	2 0	0 0	0 0	0 0
tig00000650	1594156	A	G	0 0	0 0	0 0	0 0	0 0	0 0	0 0	0 0	0 0	0 0	0 0	0 0	0 0	0 0	0 0	0 0	0 0	0 0	0 0	0 6	0 0	0 0	0 0	0 0	0 0	0 0	0 0	0 0	0 0	0 0	0 0	23 0	0 0	0 0	0 0	0 0	0 0	0 0	0 0	0 0	0 0	0 0	2 0	0 0	0 0	0 0
tig00000650	1594156	A	T	0 0	0 0	0 0	0 0	0 0	0 0	0 0	0 0	0 0	0 0	0 0	0 0	0 0	0 0	0 0	0 0	0 0	0 0	0 0	0 6	0 0	0 0	0 0	0 0	0 0	0 0	0 0	0 0	0 0	0 0	0 0	0 0	0 0	0 0	0 0	0 0	0 0	0 0	0 0	0 0	0 0	0 0	0 0	0 0	0 0	0 0
tig00000650	1594170	T	A	0 0	0 0	0 0	0 0	0 0	0 0	0 0	0 0	0 0	0 0	0 0	0 0	0 0	0 0	0 0	0 0	0 0	0 0	0 0	0 8	0 0	0 0	0 0	0 0	0 0	0 0	0 0	0 0	0 0	0 0	1 0	15 9	0 0	0 0	0 0	0 0	0 0	0 0	0 0	0 0	0 0	0 0	0 0	0 0	0 0	0 0
tig00000650	1594183	T	A	0 0	0 0	0 0	0 0	0 0	0 0	0 0	0 0	0 0	0 0	0 0	0 0	0 0	0 0	0 0	0 0	0 0	0 0	0 0	0 6	0 0	0 0	0 0	0 0	0 0	0 0	0 0	0 0	0 0	0 0	0 1	0 26	0 0	0 0	0 0	0 0	0 0	0 0	0 0	0 0	0 0	0 0	0 0	0 0	0 0	0 0
tig00000650	1594230	CT	G	0 0	0 0	0 0	0 0	0 0	0 0	0 0	0 0	0 0	0 0	0 0	0 0	0 0	0 0	0 0	0 0	0 0	0 0	0 0	0 0	0 0	0 0	0 0	0 0	0 0	0 0	0 0	0 0	0 0	0 0	0 0	0 0	0 0	0 0	0 0	0 0	0 0	0 0	3 0	0 0	0 0	3 0	0 0	0 0	0 0	0 0
tig00000650	1594230	CTT	GC	0 0	0 0	0 0	0 0	0 0	0 0	0 0	0 0	0 0	0 0	0 0	0 0	0 0	0 0	0 0	0 0	0 0	0 0	0 0	4 0	0 0	0 0	0 0	0 0	0 0	0 0	0 0	0 0	0 0	0 0	0 0	0 0	0 0	0 0	0 0	0 0	0 0	0 0	0 0	0 0	0 0	0 0	0 0	0 0	0 0	0 0
tig00000650	1594237	TC	CT	0 0	0 0	0 0	0 0	0 0	0 0	0 0	0 0	0 0	0 0	0 0	0 0	0 0	0 0	0 0	0 0	0 0	0 0	0 0	3 0	0 0	0 0	0 0	0 0	0 0	0 0	0 0	0 0	0 0	0 0	0 0	0 0	0 0	0 0	0 0	0 0	0 0	0 0	3 0	0 0	0 0	0 0	0 0	0 0	0 0	0 0
tig00000650	1594238	C	T	0 0	0 0	0 0	0 0	0 0	0 0	0 0	0 0	0 0	0 0	0 0	0 0	0 0	0 0	0 0	0 0	0 0	0 0	0 0	0 0	0 0	0 0	0 0	0 0	0 0	0 0	0 0	0 0	0 0	0 0	0 0	0 0	0 0	0 0	0 0	0 0	0 0	0 0	0 0	0 0	0 0	2 0	0 0	0 0	0 0	0 0
tig00000650	1594257	T	G	0 0	0 0	0 0	0 0	0 2	0 0	0 0	0 2	0 1	0 0	0 1	0 0	0 1	0 0	0 0	0 1	0 0	0 0	0 0	0 7	0 1	0 2	0 3	0 0	0 0	0 0	0 2	0 0	0 0	0 0	0 0	0 4	0 2	0 1	0 0	0 3	0 1	0 2	0 4	0 3	0 3	3 1	0 0	0 3	0 0	0 1
tig00000650	1594264	CTTGAG	TTTAAA	0 0	0 0	0 0	0 0	0 2	0 0	0 1	0 2	0 1	0 0	0 1	0 0	0 1	0 0	0 0	0 0	0 0	0 0	0 0	0 7	0 1	0 2	0 3	0 0	0 0	0 0	0 2	0 0	0 0	0 0	0 1	0 2	0 0	0 1	0 0	0 3	0 0	2 0	1 3	3 0	3 0	1 3	0 0	3 0	0 0	1 0
tig00000650	1594274	G	T	0 0	0 0	0 0	0 0	0 2	0 0	0 1	0 2	0 1	0 0	0 1	0 0	0 1	0 0	0 0	0 1	0 0	0 0	0 0	0 7	0 1	0 2	0 3	0 0	0 0	0 0	0 2	0 0	0 0	0 0	0 1	0 4	0 2	0 1	0 0	0 3	0 5	2 1	1 3	3 1	3 0	1 3	0 0	3 1	0 1	1 1
tig00000650	1594293	G	A	0 0	0 0	0 0	0 0	0 1	0 0	0 1	0 2	0 1	0 0	0 1	0 0	0 1	0 0	0 0	0 1	0 0	0 0	0 0	0 5	0 1	0 2	0 3	0 0	0 0	0 0	0 2	0 0	0 0	0 0	0 0	0 4	1 3	0 1	0 0	0 3	0 7	0 2	0 5	0 3	0 0	0 4	0 1	0 1	0 4	0 1
tig00000650	1594294	G	A	0 0	0 0	0 0	0 0	0 1	0 0	0 1	0 2	0 1	0 0	0 1	0 0	0 1	0 0	0 0	0 1	0 0	0 0	0 0	0 5	0 1	0 2	0 3	0 0	0 0	0 0	0 2	0 0	0 0	0 0	0 0	0 4	0 3	0 1	0 0	0 3	0 7	3 2	3 5	3 3	3 0	1 4	0 1	3 1	0 4	1 1
tig00000650	1594301	G	A	0 0	0 0	0 0	0 1	0 1	0 0	0 2	0 2	0 1	0 0	0 1	0 0	0 1	0 0	0 0	0 1	0 0	0 0	0 0	0 5	0 0	0 2	0 3	0 0	0 0	0 0	0 2	0 0	0 0	0 0	0 1	0 4	0 6	0 1	0 0	0 3	0 9	0 5	0 10	0 6	0 4	0 7	0 4	0 5	0 6	0 4
tig00000650	1594306	A	T	0 0	0 0	0 0	0 1	0 1	0 0	0 2	2 0	0 0	0 0	0 1	0 0	1 0	0 0	0 0	0 1	0 0	0 0	0 0	0 5	0 0	2 0	3 0	0 0	0 0	0 0	2 0	0 0	0 0	0 0	0 1	1 4	4 2	0 1	0 0	2 1	1 8	1 4	3 7	0 6	0 4	1 6	0 4	0 5	4 2	1 3
tig00000650	1594307	G	A	0 0	0 0	0 0	0 1	0 1	0 0	0 2	0 2	0 0	0 0	0 1	0 0	0 1	0 0	0 0	0 1	0 0	0 0	0 0	0 6	0 0	0 2	0 3	0 0	0 0	0 0	0 2	0 0	0 0	0 0	0 1	0 4	2 5	0 1	0 0	0 3	0 9	3 2	3 7	3 3	3 1	1 6	1 3	3 2	0 6	1 3
tig00000650	1594317	T	A	0 0	0 0	0 0	0 2	0 0	0 0	0 1	0 2	0 0	0 0	0 1	0 0	0 1	0 0	0 0	0 0	0 0	0 0	0 0	0 6	0 0	0 2	0 3	0 0	0 0	0 0	0 2	0 0	0 0	0 0	0 0	0 2	2 3	0 1	0 0	1 2	3 2	3 1	1 0	3 1	3 0	1 7	0 0	2 1	0 0	1 0
tig00000650	1594324	A	G	0 0	0 0	0 0	0 2	0 0	0 0	0 1	0 2	0 0	0 0	0 1	0 0	0 1	0 0	0 0	0 0	0 0	0 0	0 0	0 5	0 0	0 2	0 3	0 0	0 0	0 0	0 2	0 0	0 0	0 0	0 0	0 1	2 3	0 0	0 0	0 2	3 0	0 0	0 3	1 0	1 0	5 2	1 1	2 0	0 0	1 0
tig00000650	1594324	A	T	0 0	0 0	0 0	0 2	0 0	0 0	0 1	0 2	0 0	0 0	0 1	0 0	0 1	0 0	0 0	0 0	0 0	0 0	0 0	0 5	0 0	0 2	0 3	0 0	0 0	0 0	0 2	0 0	0 0	0 0	0 0	0 1	1 3	1 0	0 0	1 2	1 0	7 0	1 3	5 0	3 0	3 2	0 1	3 0	2 0	3 0
tig00000650	1594331	G	A	0 0	0 0	0 0	0 2	0 0	0 0	0 1	0 2	0 0	0 0	0 1	0 0	0 1	0 0	0 0	0 0	0 0	0 0	0 0	0 6	0 0	0 2	0 3	0 0	0 0	0 0	0 2	0 0	0 0	0 0	0 0	0 4	1 7	0 0	0 0	1 2	0 9	3 5	1 7	3 7	3 2	5 13	0 5	3 5	0 9	2 6
tig00000650	1594335	T	A	0 0	0 0	0 0	0 2	0 0	0 0	0 1	0 2	0 0	0 0	0 1	0 0	0 1	0 0	0 0	0 0	0 0	0 0	0 0	0 6	0 0	0 2	0 3	0 0	0 0	0 0	0 2	0 0	0 0	0 0	0 0	0 1	0 5	0 0	0 0	0 0	1 6	4 3	0 4	2 5	0 3	1 7	0 3	0 6	5 1	4 2
tig00000650	1594337	GAC	AAT	0 0	0 0	0 0	0 2	0 0	0 0	0 1	0 2	0 0	0 0	0 1	0 0	0 1	0 0	0 0	0 0	0 0	0 0	0 0	0 6	0 0	0 2	0 3	0 0	0 0	0 0	0 2	0 0	0 0	0 0	0 0	0 1	0 5	0 0	0 0	0 0	3 6	0 3	4 4	3 5	2 3	5 7	4 3	3 6	1 1	2 2
tig00000650	1594339	C	T	0 0	0 0	0 0	1 2	0 0	0 0	0 1	0 2	0 0	0 0	0 1	0 0	0 1	0 0	0 0	0 0	0 0	0 0	0 0	0 6	0 0	0 2	0 3	0 0	0 0	0 0	0 2	0 0	0 0	0 0	0 0	3 1	3 5	0 0	0 0	1 0	0 6	0 3	0 4	0 5	0 3	4 7	0 3	0 6	1 1	0 2
tig00000650	1594353	A	G	0 0	0 6	0 0	0 7	0 0	0 0	0 1	1 0	0 4	0 0	0 0	0 0	0 1	0 0	0 0	0 0	0 0	0 5	0 1	0 6	0 0	1 3	0 0	0 1	0 0	0 0	0 6	0 0	0 0	0 1	0 0	0 4	4 4	0 0	0 0	2 1	4 7	3 11	3 10	3 8	4 5	12 12	2 5	5 7	1 10	2 8
tig00000650	1594360	C	A	0 0	0 6	0 0	0 6	0 0	0 0	0 1	0 0	0 4	0 0	0 0	0 0	0 1	0 0	0 0	0 0	0 0	0 5	0 1	0 5	0 0	0 3	0 0	0 1	0 0	0 0	0 6	0 0	0 0	0 1	0 0	0 4	0 10	0 0	0 0	0 3	2 13	5 8	0 12	2 6	0 9	3 20	0 6	1 15	8 3	5 3
tig00000650	1594367	CC	AT	0 0	0 6	0 0	0 5	0 0	0 0	0 0	0 0	0 4	0 0	0 0	0 0	0 1	0 0	0 0	0 0	0 0	0 5	0 1	0 0	0 0	0 3	0 0	0 1	0 0	0 0	0 6	0 0	0 0	0 1	0 0	0 4	0 0	0 0	0 0	0 0	2 0	5 0	0 1	2 0	0 0	3 5	0 0	1 1	5 0	4 0
tig00000650	1594367	CC	TT	0 0	0 6	0 0	0 5	0 0	0 0	0 0	0 0	0 4	0 0	0 0	0 0	0 1	0 0	0 0	0 0	0 0	0 5	0 1	0 0	0 0	0 3	0 0	0 1	0 0	0 0	0 6	0 0	0 0	0 1	0 0	0 4	1 0	0 0	0 0	0 0	0 0	2 0	0 1	1 0	0 0	0 5	0 0	0 1	0 0	0 0
tig00000650	1594368	C	T	0 0	0 6	0 0	0 5	0 0	0 0	0 0	0 0	0 4	0 0	0 0	0 0	0 1	0 0	0 0	0 0	0 0	0 5	0 1	4 0	0 0	0 3	0 0	0 1	0 0	0 0	0 6	0 0	0 0	0 1	0 0	1 4	2 0	0 0	0 0	2 0	2 0	2 0	2 1	1 0	2 0	8 5	0 0	8 1	1 0	1 0
tig00000650	1594381	G	A	0 1	0 0	0 0	0 1	0 2	0 0	0 0	0 0	0 0	0 0	0 0	0 0	0 0	0 0	0 0	0 0	0 0	0 0	0 0	3 0	0 2	0 0	0 0	0 0	0 1	0 0	0 0	0 0	0 0	0 0	3 0	5 0	7 0	0 0	0 0	1 0	6 0	5 0	4 0	6 0	2 0	14 0	3 0	6 0	2 0	5 0
tig00000650	1594398	G	A	0 1	0 6	0 0	0 6	0 2	0 0	0 0	0 0	0 4	0 0	0 0	0 0	0 1	0 0	0 0	0 0	0 0	0 5	0 1	0 7	0 2	0 3	0 0	0 1	0 1	0 0	0 6	0 0	0 0	0 1	4 39	1 68	0 11	0 7	0 5	0 9	2 53	5 37	0 31	0 42	2 43	0 61	1 39	1 60	3 47	0 53
tig00000650	1594407	C	T	0 1	0 6	0 0	0 6	0 2	0 0	0 0	0 0	0 4	0 0	0 0	0 0	0 1	0 0	0 0	0 0	0 0	0 5	0 1	0 8	0 2	0 3	0 0	0 1	0 1	0 0	0 6	0 0	0 0	0 1	1 70	2 104	0 12	0 7	0 5	0 8	18 50	8 42	13 18	17 33	9 41	16 69	15 29	20 47	5 49	12 54
tig00000650	1594408	A	T	0 1	0 6	0 0	0 6	0 2	0 0	0 0	0 0	0 4	0 0	0 0	0 0	0 1	0 0	0 0	0 0	0 0	0 5	0 1	0 8	0 2	0 3	0 0	0 1	0 1	0 0	0 6	0 0	0 0	0 1	0 73	0 117	0 12	0 7	0 5	0 9	0 68	0 51	0 36	0 52	0 52	0 87	0 45	0 71	0 57	0 67
tig00000650	1594417	C	A	0 0	0 6	0 0	0 6	0 2	0 0	0 0	0 0	0 4	0 0	0 0	0 0	0 1	0 0	0 0	0 0	0 0	0 5	0 1	0 8	0 2	0 3	0 0	0 1	0 1	0 0	0 6	0 0	0 0	0 1	0 94	0 135	0 12	0 4	0 9	0 11	3 70	5 49	0 39	3 53	0 56	7 93	0 48	1 72	12 44	7 62
tig00000650	1594423	A	G	0 1	0 6	0 0	0 6	0 2	0 0	0 0	0 0	0 4	0 0	0 0	0 0	0 1	0 0	0 0	0 0	0 0	0 5	0 1	0 8	0 2	0 3	0 0	0 1	0 1	0 0	0 6	0 0	0 0	0 1	0 98	0 135	0 13	0 8	0 9	0 8	0 75	0 61	0 50	0 69	0 62	0 99	0 55	0 82	0 57	0 72
tig00000650	1594469	C	T	0 0	0 0	0 0	0 0	0 0	0 0	0 0	0 0	0 0	0 0	0 0	0 0	0 0	0 0	0 0	0 0	0 0	0 0	0 0	1 12	0 0	0 0	0 0	0 0	0 0	0 0	0 0	0 0	0 0	0 0	2 108	6 102	0 12	0 7	0 8	0 9	0 94	0 72	6 43	0 55	2 77	1 124	1 64	0 114	2 93	1 98
tig00000650	1594470	G	A	0 0	0 0	0 0	0 0	0 0	0 0	0 0	0 0	0 0	0 0	0 0	0 0	0 0	0 0	0 0	0 0	0 0	0 0	0 0	0 12	0 0	0 0	0 0	0 0	0 0	0 0	0 0	0 0	0 0	0 0	1 108	0 102	0 12	1 7	0 8	0 9	5 94	4 72	2 43	13 55	6 77	5 124	5 64	9 114	3 93	7 98
tig00000650	1594471	G	A	0 0	0 0	0 0	0 0	0 0	0 0	0 0	0 0	0 0	0 0	0 0	0 0	0 0	0 0	0 0	0 0	0 0	0 0	0 0	0 12	0 0	0 0	0 0	0 0	0 0	0 0	0 0	0 0	0 0	0 0	0 108	5 102	4 12	1 7	1 8	0 9	11 94	2 72	6 43	15 55	1 77	2 124	2 64	7 114	2 93	4 98
tig00000650	1594473	A	G	0 0	0 0	0 0	0 0	0 0	0 0	0 0	0 0	0 0	0 0	0 0	0 0	0 0	0 0	0 0	0 0	0 0	0 0	0 0	0 12	0 0	0 0	0 0	0 0	0 0	0 0	0 0	0 0	0 0	0 0	0 108	6 102	0 12	0 7	0 8	0 9	0 94	0 72	0 43	0 55	0 77	0 124	0 64	0 114	0 93	0 98
tig00000650	1594509	C	A	0 0	0 0	0 0	0 0	0 0	0 0	0 0	0 0	0 0	0 0	0 0	0 0	0 0	0 0	0 0	0 0	0 0	0 0	0 0	0 13	0 0	0 0	0 0	0 0	0 0	0 0	0 0	0 0	0 0	0 0	0 28	6 39	2 9	0 4	0 3	0 5	0 47	0 31	2 34	0 53	0 48	0 56	0 37	2 48	0 32	2 51
tig00000650	1594512	T	G	0 0	0 0	0 0	0 0	0 0	0 0	0 0	0 0	0 0	0 0	0 0	0 0	0 0	0 0	0 0	0 0	0 0	0 0	0 0	0 13	0 0	0 0	0 0	0 0	0 0	0 0	0 0	0 0	0 0	0 0	2 28	1 39	0 9	1 4	0 3	0 5	17 47	17 31	7 34	12 53	11 48	21 56	11 37	20 48	16 32	23 51
tig00000650	1594520	A	G	0 0	0 0	0 0	0 0	0 0	0 0	0 0	0 0	0 0	0 0	0 0	0 0	0 0	0 0	0 0	0 0	0 0	0 0	0 0	1 13	0 0	0 0	0 0	0 0	0 0	0 0	0 0	0 0	0 0	0 0	0 28	0 39	1 9	0 4	1 3	1 5	44 47	32 31	16 34	19 53	31 48	37 56	36 37	44 48	36 32	35 51
tig00000650	1594524	G	A	0 0	0 0	0 0	0 0	0 0	0 0	0 0	0 0	0 0	0 0	0 0	0 0	0 0	0 0	0 0	0 0	0 0	0 0	0 0	1 14	0 0	0 0	0 0	0 0	0 0	0 0	0 0	0 0	0 0	0 0	2 46	20 62	0 18	0 6	0 8	2 9	9 129	8 84	1 72	10 116	6 109	8 171	0 108	10 154	11 114	21 133
tig00000650	1594577	G	A	0 1	0 3	0 2	0 0	0 0	0 3	0 1	0 4	0 1	0 1	0 4	0 0	0 2	0 0	0 7	0 1	0 3	0 9	0 4	0 8	0 1	0 0	0 5	0 3	0 1	0 2	0 3	0 2	0 1	0 2	0 24	10 46	0 16	0 9	0 12	0 8	0 93	0 59	1 52	4 86	2 70	3 117	0 66	0 114	1 76	0 103
tig00000650	1594579	G	T	0 1	0 3	0 2	0 0	0 0	0 3	0 1	0 4	0 1	0 1	0 4	0 0	0 2	0 0	0 7	0 1	0 3	0 9	0 4	0 8	0 1	0 0	0 5	0 3	0 1	0 2	0 4	0 2	0 1	0 2	5 18	1 51	4 12	0 9	0 10	0 7	4 90	0 59	5 43	0 88	0 71	8 109	0 66	2 113	5 73	13 90
tig00000650	1594596	G	A	0 1	0 2	0 2	0 0	0 0	0 3	0 1	0 2	0 1	0 1	0 9	0 2	0 3	0 0	5 4	0 1	0 2	0 9	0 3	0 8	0 1	0 0	0 7	0 3	0 1	0 2	0 5	0 3	0 2	0 4	0 16	0 26	0 12	1 6	1 8	1 5	7 63	2 51	4 38	1 69	0 56	0 101	0 53	0 92	1 58	5 78
tig00000650	1594597	G	A	0 1	0 2	0 2	0 0	0 0	0 3	0 1	0 2	0 1	0 1	0 9	0 2	0 3	0 0	0 4	0 1	0 2	0 9	0 3	0 8	0 1	0 0	0 7	0 3	0 1	0 2	0 5	0 3	0 2	0 4	0 16	1 26	0 12	0 6	1 8	0 5	8 63	1 51	5 38	12 69	4 56	6 101	3 53	6 92	4 58	11 78
tig00000650	1594600	C	A	0 1	0 3	0 2	0 0	0 0	0 3	0 1	0 4	0 1	0 1	0 11	0 2	0 4	0 0	0 11	0 1	0 3	0 10	0 4	0 8	0 1	0 0	0 9	0 3	0 1	0 2	0 6	0 4	0 2	0 4	0 15	0 25	0 11	0 8	0 10	0 6	0 79	0 54	0 48	0 85	0 60	0 101	0 59	18 82	0 61	5 86
tig00000650	1594607	C	T	0 1	0 3	0 2	0 0	0 0	0 3	0 1	0 4	0 1	0 1	0 11	0 3	0 5	0 0	0 12	0 1	0 3	0 11	0 4	0 7	0 1	0 0	0 10	0 3	0 1	0 2	0 8	0 6	0 3	0 4	5 6	1 26	0 12	1 5	1 9	0 6	34 44	23 30	21 26	23 62	14 48	40 58	27 26	39 59	18 46	45 44
tig00000650	1594608	G	A	0 1	0 3	0 2	0 0	0 0	0 3	0 1	0 4	0 1	0 1	0 11	0 3	0 5	0 0	0 12	0 1	0 3	0 12	0 4	0 7	0 1	0 0	0 10	0 3	0 1	0 2	0 8	0 6	0 3	0 4	0 10	2 23	1 11	0 6	0 10	0 6	6 74	3 51	3 47	5 77	10 53	2 91	1 52	0 100	8 53	7 81
tig00000650	1594615	TAG	CAA	0 1	0 3	0 2	0 0	0 0	0 3	0 1	0 4	0 1	0 1	0 11	0 3	0 6	0 0	0 10	0 1	0 3	0 11	0 4	0 5	0 1	0 0	0 13	0 3	0 1	0 2	0 8	0 9	0 3	0 5	0 6	0 15	0 6	0 5	0 6	0 4	0 61	0 37	0 40	0 73	0 47	0 63	0 40	0 59	0 34	0 63
tig00000650	1594617	G	A	0 1	0 3	0 2	0 0	0 0	0 3	0 1	0 4	0 1	0 1	0 11	0 3	0 6	0 0	0 10	0 1	0 3	0 11	0 4	0 5	0 1	0 0	0 13	0 3	0 1	0 2	0 8	0 9	0 3	0 5	0 6	0 15	0 6	0 5	0 6	0 4	0 61	1 37	1 40	0 73	1 47	6 63	0 40	17 59	0 34	5 63
tig00000650	1594617	GCAG	ACAA	0 1	0 3	0 2	0 0	0 0	0 3	0 1	0 4	0 1	0 1	0 11	0 3	0 6	0 0	0 10	0 1	0 3	0 11	0 4	0 5	0 1	0 0	0 13	0 3	0 1	0 2	0 8	0 9	0 3	0 5	0 6	0 15	0 6	0 5	0 6	0 4	0 61	0 37	0 40	0 73	0 47	2 63	0 40	0 59	0 34	1 63
tig00000650	1594633	T	C	0 0	0 0	0 0	0 0	0 0	0 0	0 0	0 0	0 0	0 0	0 0	0 0	0 0	0 0	0 9	0 0	0 0	0 0	0 0	0 2	0 0	0 0	0 0	0 0	0 0	0 0	0 0	0 0	0 0	0 0	0 0	0 0	0 0	0 0	0 0	0 0	9 0	2 0	5 0	14 0	4 0	0 0	0 0	9 0	1 0	2 0
tig00000650	1594633	TGGTTGAAGG	CGGTTGAAGA	0 0	0 0	0 0	0 0	0 0	0 0	0 0	0 0	0 0	0 0	0 0	0 0	0 0	0 0	0 9	0 0	0 0	0 0	0 0	0 2	0 0	0 0	0 0	0 0	0 0	0 0	0 0	0 0	0 0	0 0	0 0	0 0	0 0	0 0	0 0	0 0	5 0	1 0	3 0	7 0	6 0	8 0	6 0	13 0	3 0	7 0
tig00000650	1594633	TGGTTGAAGGT	CGGTTGAAGAC	0 0	0 0	0 0	0 0	0 0	0 0	0 0	0 0	0 0	0 0	0 0	0 0	0 0	0 0	0 9	0 0	0 0	0 0	0 0	0 2	0 0	0 0	0 0	0 0	0 0	0 0	0 0	0 0	0 0	0 0	0 0	2 0	0 0	0 0	0 0	0 0	2 0	3 0	4 0	4 0	0 0	0 0	0 0	3 0	1 0	1 0
tig00000650	1594634	G	A	0 0	0 0	0 0	0 0	0 0	0 0	0 0	0 0	0 0	0 0	0 0	0 0	0 0	0 0	0 9	0 0	0 0	0 0	0 0	0 2	0 0	0 0	0 0	0 0	0 0	0 0	0 0	0 0	0 0	0 0	0 0	0 0	0 0	0 0	0 0	0 0	13 0	6 0	3 0	2 0	4 0	18 0	1 0	8 0	8 0	9 0
tig00000650	1594635	GTTGAAGGT	ATGGAAGAC	0 0	0 0	0 0	0 0	0 0	0 0	0 0	0 0	0 0	0 0	0 0	0 0	0 0	0 0	0 9	0 0	0 0	0 0	0 0	0 2	0 0	0 0	0 0	0 0	0 0	0 0	0 0	0 0	0 0	0 0	0 0	0 0	0 0	0 0	0 0	0 0	0 0	0 0	0 0	0 0	0 0	0 0	0 0	12 0	0 0	0 0
tig00000650	1594642	GT	AC	0 0	0 0	0 0	0 0	0 0	0 0	0 0	0 0	0 0	0 0	0 0	0 0	0 0	0 0	0 9	0 0	0 0	0 0	0 0	0 2	0 0	0 0	0 0	0 0	0 0	0 0	0 0	0 0	0 0	0 0	0 0	0 0	1 0	0 0	0 0	0 0	7 0	3 0	6 0	9 0	3 0	5 0	3 0	3 0	6 0	7 0
tig00000650	1594643	T	C	0 0	0 0	0 0	0 0	0 0	0 0	0 0	0 0	0 0	0 0	9 0	2 0	5 0	0 0	4 9	0 0	0 0	5 0	0 0	0 2	0 0	0 0	10 0	0 0	0 0	0 0	7 0	7 0	4 0	6 0	0 0	0 0	0 0	0 0	0 0	0 0	0 0	0 0	0 0	0 0	0 0	0 0	0 0	0 0	0 0	0 0
tig00000650	1594647	C	T	0 1	0 0	0 3	0 2	0 5	0 5	0 2	0 5	0 3	0 7	0 15	0 5	0 15	0 4	0 21	0 0	0 7	0 12	0 18	0 4	0 2	0 2	0 21	0 5	0 4	0 2	0 12	0 16	0 9	0 11	0 5	1 21	0 8	0 0	0 2	0 1	6 54	3 33	4 36	11 46	6 27	10 43	8 17	21 58	4 35	8 43
tig00000650	1594660	C	T	1 2	1 0	2 6	1 2	0 12	1 15	0 2	0 10	1 11	0 7	3 16	0 6	2 14	0 8	3 20	1 0	3 8	3 13	3 24	0 7	1 5	1 2	2 23	2 6	1 16	0 6	3 13	2 18	1 7	0 13	3 14	0 48	0 9	0 2	0 10	0 1	9 64	4 41	6 40	14 50	9 29	13 44	8 20	24 54	7 37	10 47
tig00000650	1594663	G	A	0 1	0 0	0 5	0 2	0 8	0 10	0 1	0 9	0 9	0 0	0 16	0 6	0 14	0 8	0 17	0 0	0 4	0 11	0 24	0 7	0 5	0 3	0 21	0 7	0 14	0 3	0 12	0 20	0 9	0 12	7 13	10 22	0 3	0 2	0 9	0 0	2 47	1 34	1 24	0 47	2 24	3 35	0 16	2 62	4 20	10 23
tig00000650	1594663	GGG	AGA	0 1	0 0	0 5	0 2	1 8	0 10	0 1	0 9	0 9	0 0	0 16	0 6	0 14	0 8	0 17	0 0	0 4	0 11	0 24	0 7	0 5	0 3	0 21	0 7	0 14	0 3	0 12	0 20	0 9	0 12	0 13	1 22	0 3	0 2	0 9	0 0	10 47	6 34	4 24	2 47	2 24	3 35	3 16	0 62	2 20	4 23
tig00000650	1594663	GGGAAC	AGGAAT	0 1	0 0	0 5	0 2	0 8	0 10	0 1	0 9	0 9	0 0	0 16	0 6	0 14	0 8	0 17	0 0	0 4	0 11	0 24	0 7	0 5	0 3	0 21	0 7	0 14	0 3	0 12	0 20	0 9	0 12	0 13	0 22	0 3	0 2	0 9	0 0	1 47	0 34	3 24	2 47	0 24	0 35	1 16	4 62	4 20	0 23
tig00000650	1594663	G	GA	0 1	0 0	0 5	0 2	0 8	0 10	0 1	0 9	0 9	0 0	0 16	0 6	0 14	0 8	0 17	0 0	0 4	0 11	0 24	0 7	0 5	0 3	0 21	0 7	0 14	0 3	0 12	0 20	0 9	0 12	0 13	0 22	0 3	0 2	0 9	0 0	0 47	0 34	0 24	0 47	0 24	0 35	0 16	0 62	0 20	0 23
tig00000650	1594664	G	A	0 1	0 0	0 5	0 2	0 8	3 10	0 1	0 9	0 9	0 0	0 16	0 6	0 14	0 8	0 17	0 0	4 4	0 11	0 24	0 7	0 5	0 3	0 21	0 7	0 14	1 3	0 12	0 20	0 9	0 12	0 13	0 22	0 3	0 2	0 9	0 0	1 47	1 34	0 24	0 47	0 24	0 35	0 16	0 62	0 20	0 23
tig00000650	1594664	GGAAC	AGAAT	0 1	0 0	0 5	0 2	0 8	0 10	0 1	0 9	0 9	0 0	0 16	0 6	0 14	0 8	0 17	0 0	0 4	0 11	0 24	0 7	0 5	0 3	0 21	0 7	0 14	0 3	0 12	0 20	0 9	0 12	0 13	0 22	0 3	0 2	0 9	0 0	0 47	0 34	0 24	0 47	0 24	0 35	0 16	0 62	0 20	0 23
tig00000650	1594668	C	T	0 1	0 0	0 5	0 2	0 8	0 10	0 1	0 9	0 9	0 0	0 16	0 6	0 14	0 8	0 17	0 0	0 4	0 11	0 24	0 7	0 5	0 3	0 21	0 7	0 14	0 3	0 12	0 20	0 9	0 12	0 13	0 22	0 3	0 2	0 9	0 0	3 47	5 34	0 24	0 47	2 24	4 35	1 16	1 62	7 20	10 23
tig00000650	1594669	A	C	0 1	0 0	0 5	0 2	0 8	0 10	0 1	0 9	0 9	0 0	0 16	0 6	0 14	0 8	0 17	0 0	0 4	0 11	0 24	1 7	0 5	0 3	0 21	0 7	0 14	0 3	0 12	0 20	0 9	0 12	0 13	0 22	0 3	0 2	0 9	0 0	0 47	0 34	0 24	0 47	0 24	0 35	0 16	0 62	0 20	0 23
tig00000650	1594670	G	A	0 3	0 1	0 8	0 3	0 12	0 13	0 2	0 10	0 12	0 7	0 16	0 6	0 16	0 8	0 19	0 1	0 11	1 11	0 27	0 9	0 6	0 3	0 23	0 8	0 17	0 6	0 14	0 19	0 9	0 12	0 21	0 61	4 4	0 3	1 11	0 1	9 62	4 45	11 35	16 39	7 34	13 54	9 16	20 51	5 34	10 43
tig00000650	1594710	T	C	0 14	0 20	0 19	0 18	0 19	0 37	0 9	0 31	0 37	0 17	0 15	0 5	0 15	0 19	0 16	0 7	0 34	0 15	0 40	0 13	0 10	0 9	0 17	0 19	0 25	0 14	0 16	0 14	0 10	0 14	0 25	0 84	0 7	0 5	1 12	0 0	0 64	0 44	0 55	0 54	0 43	0 78	0 26	0 65	0 49	0 62
tig00000650	1594719	GAA	AAG	1 13	0 19	0 14	1 16	0 15	3 28	0 7	0 27	3 30	0 13	0 9	0 3	0 7	1 14	0 6	0 6	0 31	0 10	0 38	0 10	0 4	0 9	0 7	2 14	0 20	1 10	0 11	0 8	0 6	0 5	0 5	0 22	0 3	0 3	0 6	0 0	0 34	0 19	0 34	0 14	0 14	0 34	0 8	0 24	0 28	0 27
tig00000650	1594719	GAAGTTAGATTCGGTGACTGTG	AAGGTTGGATTCAGTGACTA	0 13	0 19	0 14	0 16	0 15	0 28	0 7	0 27	0 30	0 13	0 9	0 3	0 7	0 14	0 6	0 6	0 31	0 10	0 38	0 10	0 4	0 9	0 7	0 14	0 20	0 10	0 11	0 8	0 6	0 5	0 5	0 22	0 3	0 3	0 6	0 0	4 34	4 19	7 34	14 14	3 14	9 34	7 8	12 24	6 28	5 27
tig00000650	1594721	AGTTAGATTCG	GGTTAGATTCA	0 13	0 19	0 14	0 16	0 15	0 28	0 7	0 27	0 30	0 13	0 9	0 3	0 7	0 14	0 6	0 6	0 31	0 10	0 38	0 10	0 4	0 9	0 7	0 14	0 20	0 10	0 11	0 8	0 6	0 5	0 5	0 22	0 3	0 3	0 6	0 0	0 34	0 19	0 34	0 14	0 14	0 34	0 8	0 24	0 28	0 27
tig00000650	1594723	TTAGATTCGG	CTAAATTCAA	0 13	0 19	0 14	0 16	0 15	0 28	0 7	0 27	0 30	0 13	0 9	0 3	0 7	0 14	0 6	0 6	0 31	0 10	0 38	0 10	0 4	0 9	0 7	0 14	0 20	0 10	0 11	0 8	0 6	0 5	0 5	0 22	0 3	0 3	0 6	0 0	0 34	0 19	0 34	0 14	0 14	0 34	0 8	0 24	0 28	0 27
tig00000650	1594723	T	G	0 13	0 19	0 14	0 16	0 15	0 28	0 7	0 27	0 30	0 13	0 9	0 3	0 7	0 14	0 6	0 6	0 31	0 10	0 38	0 10	0 4	0 9	0 7	0 14	0 20	0 10	0 11	0 8	0 6	0 5	0 5	0 22	3 3	0 3	0 6	0 0	0 34	0 19	0 34	0 14	0 14	0 34	0 8	0 24	0 28	0 27
tig00000650	1594731	G	A	0 13	0 19	0 14	0 16	0 15	0 28	0 7	0 27	0 30	0 13	0 9	0 3	0 7	0 14	0 6	0 6	0 31	0 10	0 38	0 10	0 4	0 9	0 7	0 14	0 20	0 10	0 11	0 8	0 6	0 5	1 5	0 22	0 3	0 3	0 6	0 0	1 34	2 19	0 34	0 14	0 14	0 34	1 8	1 24	3 28	6 27
tig00000650	1594731	G	C	0 13	0 19	0 14	0 16	0 15	0 28	0 7	0 27	0 30	0 13	0 9	0 3	0 7	0 14	0 6	0 6	0 31	0 10	0 38	0 10	0 4	0 9	0 7	0 14	0 20	0 10	0 11	0 8	0 6	0 5	4 5	0 22	0 3	0 3	0 6	0 0	0 34	0 19	0 34	0 14	0 14	0 34	0 8	0 24	0 28	0 27
tig00000650	1594749	AGGGG	GAGGGT	0 0	0 0	0 2	0 0	0 0	0 0	0 0	0 0	0 1	0 0	0 0	0 0	0 0	0 0	0 0	0 0	0 1	0 0	0 0	0 9	0 0	0 0	0 0	0 0	0 0	0 1	0 0	0 0	0 0	0 0	0 0	0 0	0 0	0 0	0 0	0 0	4 4	4 7	6 2	14 0	3 2	8 10	6 2	12 2	6 4	4 7
tig00000650	1594768	C	T	0 16	0 21	0 15	0 22	0 17	0 30	0 14	0 28	0 32	0 22	0 7	0 2	0 6	0 24	0 9	0 10	0 25	0 7	0 21	0 9	0 6	0 11	0 2	0 12	0 11	0 15	0 6	0 0	0 5	0 8	0 0	0 11	0 3	0 0	0 1	0 0	0 14	0 15	0 14	0 24	0 11	0 19	0 12	0 28	0 7	0 20
tig00000650	1594769	C	T	0 16	0 21	0 15	0 22	0 17	0 30	0 14	0 28	0 32	0 22	0 7	0 2	0 6	0 24	0 9	0 10	0 25	0 7	0 21	0 9	0 6	0 11	0 2	0 12	0 11	0 15	0 6	0 0	0 5	0 8	0 0	0 11	0 3	1 0	0 1	0 0	0 14	0 15	0 14	0 24	0 11	0 19	0 12	0 28	0 7	0 20
tig00000650	1594770	T	C	0 16	0 21	0 15	0 22	0 17	0 30	0 14	0 28	0 32	0 22	0 7	0 2	0 6	0 24	0 9	0 10	0 25	0 7	0 21	1 9	0 6	0 11	0 2	0 12	0 11	0 15	0 6	0 0	0 5	0 8	0 0	0 11	1 3	0 0	0 1	0 0	16 14	17 15	10 14	4 24	9 11	23 19	7 12	3 28	17 7	10 20
tig00000650	1594779	G	A	0 14	0 15	0 14	0 21	0 16	0 27	0 13	0 24	0 30	0 20	0 7	0 1	0 6	0 21	0 9	0 8	6 15	0 6	3 15	0 11	0 4	1 9	0 2	0 12	0 9	0 13	0 6	0 0	0 4	0 8	0 0	0 9	0 4	0 1	0 1	0 0	2 32	2 35	11 22	0 37	1 23	8 56	1 20	1 35	2 32	2 38
tig00000650	1594795	T	A	0 0	0 0	0 0	0 0	0 0	0 0	0 0	2 0	0 0	0 0	0 0	0 0	0 0	0 0	0 0	0 0	0 0	0 0	0 0	0 7	0 0	0 0	0 0	0 0	0 0	0 0	0 0	0 0	0 0	0 0	0 0	1 0	0 0	0 0	0 0	0 0	4 0	1 0	9 0	3 0	5 0	10 0	3 0	5 0	2 0	8 0
tig00000650	1594810	A	G	0 0	0 0	0 0	0 2	0 0	0 2	0 0	0 2	0 4	0 0	0 0	0 0	0 0	0 0	0 5	0 1	0 0	0 0	0 0	0 6	0 0	0 0	0 0	0 0	0 0	0 0	0 0	0 0	0 0	0 0	0 0	0 5	0 4	0 0	0 0	0 0	3 4	1 8	9 8	2 12	0 5	10 15	2 3	2 8	3 9	3 13
tig00000650	1594830	T	C	0 0	0 0	0 0	0 2	0 0	0 2	0 0	0 2	0 0	0 0	0 0	0 0	0 0	0 0	0 5	0 1	0 0	0 0	0 0	0 5	0 0	0 0	0 0	0 0	0 0	0 0	0 0	0 0	0 0	0 0	0 0	0 5	0 2	0 0	0 0	0 0	1 5	1 2	0 7	1 2	1 1	2 11	0 1	0 5	0 5	6 3
tig00000650	1594830	TAGG	CAGA	0 0	0 0	0 0	0 2	0 0	0 2	0 0	0 2	0 0	0 0	0 0	0 0	0 0	0 0	0 5	0 1	0 0	0 0	0 0	0 5	0 0	0 0	0 0	0 0	0 0	0 0	0 0	0 0	0 0	0 0	0 0	0 5	0 2	0 0	0 0	0 0	0 5	1 2	2 7	3 2	1 1	4 11	1 1	1 5	0 5	2 3
tig00000650	1594843	G	A	0 0	0 0	0 0	0 0	0 0	0 0	0 0	0 0	0 0	0 0	0 0	0 0	0 0	0 0	0 0	0 0	0 0	0 0	0 0	5 0	0 0	0 0	0 0	0 0	0 0	0 0	0 0	0 0	0 0	0 0	0 0	4 0	2 0	0 0	0 0	0 0	1 0	1 0	4 0	0 0	2 0	1 0	1 0	1 0	0 0	2 0
tig00000650	1594852	CGC	TGCT	0 0	0 0	0 0	0 0	0 0	0 0	0 0	0 0	0 0	0 0	0 0	0 0	0 0	0 0	0 0	0 0	0 0	0 0	0 0	5 0	0 0	0 0	0 0	0 0	0 0	0 0	0 0	0 0	0 0	0 0	0 0	0 0	0 0	0 0	0 0	0 0	0 0	0 0	0 0	0 0	2 0	1 0	0 0	0 0	0 0	0 0
tig00000650	1594922	G	A	0 12	0 7	0 2	0 6	0 11	0 18	0 7	0 1	0 0	0 1	0 3	0 1	0 2	0 9	0 2	0 4	0 2	0 4	0 6	0 9	0 1	0 4	0 2	0 1	0 4	0 9	0 6	0 6	0 3	0 0	8 37	0 68	0 9	0 0	0 0	0 2	1 8	3 2	2 20	4 6	8 4	6 8	1 8	0 5	0 4	1 22
tig00000650	1594925	C	T	0 12	0 7	0 2	0 6	0 11	0 18	0 7	0 1	0 0	0 1	0 3	0 1	0 2	0 9	0 2	0 4	0 2	0 4	0 6	0 9	0 1	0 4	0 2	0 1	0 4	0 9	0 6	0 6	0 3	0 0	1 37	0 68	0 9	0 0	0 0	0 2	0 8	0 2	0 20	0 6	1 4	0 8	0 8	0 5	0 4	0 22
tig00000650	1594927	G	A	0 10	0 7	0 2	0 5	0 9	0 17	0 7	0 1	0 0	1 0	0 3	0 0	0 0	0 6	0 2	0 4	0 6	0 3	0 1	0 9	0 0	0 0	0 2	0 1	0 3	0 6	0 2	0 5	0 1	0 0	3 43	5 66	0 5	0 0	0 0	1 0	0 8	0 2	0 4	0 6	0 8	0 8	2 4	0 4	0 2	0 12
tig00000650	1594928	G	A	0 10	0 7	0 2	0 5	0 9	0 17	0 7	0 1	0 0	0 0	0 3	0 0	1 0	0 6	0 2	0 4	0 6	0 3	0 1	0 9	0 0	0 0	0 2	0 1	0 3	1 6	0 2	1 5	0 1	0 0	0 43	0 66	4 5	0 0	0 0	1 0	2 8	3 2	15 4	4 6	5 8	6 8	3 4	0 4	2 2	11 12
tig00000650	1594935	CGT	C	0 9	0 5	0 1	0 5	0 2	0 7	0 1	0 1	0 0	0 0	0 0	0 0	0 0	0 4	0 0	0 4	0 4	0 0	0 0	0 7	0 0	0 0	0 0	0 0	0 0	0 0	0 0	0 1	0 0	0 0	0 0	2 0	0 0	0 0	0 0	0 0	0 0	0 0	10 0	0 0	0 0	0 0	0 0	0 0	0 0	10 0
tig00000650	1594961	G	A	0 25	0 12	0 14	0 16	0 20	0 22	0 21	0 9	0 15	0 3	0 5	0 3	0 6	0 14	0 13	0 14	0 4	0 22	0 17	0 7	0 6	0 6	0 5	0 12	0 17	0 16	0 15	0 4	0 5	0 4	0 79	4 72	1 8	0 0	0 0	0 2	2 10	6 2	13 8	6 7	6 11	7 11	3 8	4 8	3 4	15 15
tig00000650	1594967	A	G	0 25	0 8	0 17	0 16	0 20	0 20	0 21	0 12	0 16	0 3	0 5	0 2	0 6	0 14	0 15	0 14	0 3	0 25	0 20	0 7	0 8	0 7	0 5	0 14	0 17	0 16	0 17	0 6	0 7	0 5	0 70	0 77	3 6	0 0	0 0	0 2	0 11	0 9	0 19	0 13	6 10	0 16	0 11	2 8	0 7	2 30
tig00000650	1594968	C	G	0 18	0 7	0 17	0 15	0 20	0 16	0 20	0 6	0 14	0 3	0 4	0 2	0 6	0 12	0 11	0 14	0 2	0 17	0 7	0 7	0 5	0 3	0 4	0 7	0 15	0 14	0 11	0 3	0 2	0 3	0 56	0 64	0 6	0 0	0 0	0 2	2 0	4 2	0 16	2 7	0 11	2 8	0 4	0 2	0 6	0 24
tig00000650	1594968	C	T	0 18	0 7	0 17	0 15	0 20	1 16	0 20	2 6	0 14	0 3	0 4	0 2	1 6	0 12	0 11	0 14	0 2	0 17	2 7	0 7	0 5	0 3	0 4	1 7	0 15	0 14	2 11	2 3	1 2	1 3	4 56	2 64	0 6	0 0	0 0	0 2	0 0	0 2	0 16	0 7	2 11	0 8	5 4	0 2	0 6	0 24
tig00000650	1594970	G	A	3 18	0 7	0 17	0 15	0 20	0 16	0 20	0 6	0 14	0 3	0 4	0 2	0 6	0 12	1 11	0 14	0 2	3 17	0 7	0 7	0 5	0 3	0 4	0 7	0 15	0 14	0 11	0 3	2 2	0 3	7 56	0 64	2 6	0 0	0 0	0 2	4 0	0 2	2 16	1 7	1 11	1 8	2 4	3 2	1 6	5 24
tig00000650	1594974	C	T	0 34	0 6	0 19	0 18	0 20	0 20	0 26	0 16	0 16	0 8	0 4	0 2	0 9	0 13	0 15	0 16	0 1	0 26	0 21	0 7	0 10	0 8	0 3	0 14	0 17	0 17	0 16	0 6	0 9	0 6	0 62	12 61	1 8	0 0	0 0	0 2	0 10	1 8	0 20	2 10	5 11	0 17	0 11	0 11	0 7	0 31
tig00000650	1594983	G	A	0 29	0 6	0 20	0 14	0 13	0 12	0 27	0 15	0 15	0 10	0 3	0 2	0 6	0 11	0 18	0 12	0 2	0 20	0 26	0 8	0 10	0 6	0 4	0 10	0 17	0 17	0 16	0 4	0 10	0 5	0 21	0 30	0 3	0 0	0 0	0 0	0 2	0 1	0 3	0 5	0 1	2 1	0 0	0 4	0 3	0 7
tig00000650	1594986	GTT	AAG	0 29	0 6	0 20	0 14	0 13	0 12	0 27	0 15	0 15	0 10	0 3	0 2	0 6	0 11	0 18	0 12	0 2	0 20	0 26	0 8	0 10	0 6	0 4	0 10	0 17	0 17	0 16	0 4	0 10	0 5	0 21	0 30	0 3	0 0	0 0	0 0	0 2	0 1	0 3	0 5	6 1	0 1	0 0	0 4	0 3	3 7
tig00000650	1594987	TT	AG	0 29	0 6	0 20	0 14	0 13	0 12	0 27	0 15	0 15	0 10	0 3	0 2	0 6	0 11	0 18	0 12	0 2	0 20	0 26	0 8	0 10	0 6	0 4	0 10	0 17	0 17	0 16	0 4	0 10	0 5	1 21	1 30	1 3	0 0	0 0	0 0	0 2	0 1	0 3	0 5	0 1	0 1	0 0	0 4	0 3	0 7
tig00000650	1594988	T	G	0 29	0 6	0 20	0 14	0 13	0 12	0 27	0 15	0 15	0 10	0 3	0 2	0 6	0 11	0 18	0 12	0 2	0 20	0 26	0 8	0 10	0 6	0 4	0 10	0 17	0 17	0 16	0 4	0 10	0 5	19 21	16 30	0 3	0 0	0 0	1 0	0 2	0 1	0 3	2 5	1 1	1 1	1 0	0 4	0 3	1 7
tig00000650	1594988	TTTCCC	GTTCCA	0 29	0 6	0 20	0 14	0 13	0 12	0 27	0 15	0 15	0 10	0 3	0 2	0 6	0 11	0 18	0 12	0 2	0 20	0 26	0 8	0 10	0 6	0 4	0 10	0 17	0 17	0 16	0 4	0 10	0 5	0 21	0 30	0 3	0 0	0 0	0 0	0 2	0 1	0 3	0 5	0 1	0 1	0 0	0 4	0 3	0 7
tig00000650	1594991	C	T	0 29	0 6	0 20	0 14	0 13	0 12	0 27	0 15	0 15	0 10	0 3	0 2	0 6	0 11	0 18	0 12	0 2	0 20	0 26	0 8	0 10	0 6	0 4	0 10	0 17	0 17	0 16	0 4	0 10	0 5	0 21	0 30	0 3	0 0	0 0	0 0	2 2	0 1	0 3	0 5	0 1	0 1	2 0	0 4	0 3	3 7
tig00000650	1594991	C	TTT	0 29	0 6	0 20	0 14	0 13	0 12	0 27	0 15	0 15	0 10	0 3	0 2	0 6	0 11	0 18	0 12	0 2	0 20	0 26	0 8	0 10	0 6	0 4	0 10	0 17	0 17	0 16	0 4	0 10	0 5	0 21	0 30	0 3	0 0	0 0	0 0	2 2	5 1	9 3	2 5	3 1	5 1	1 0	0 4	3 3	11 7
tig00000650	1594993	C	T	0 29	0 6	0 20	0 14	0 13	0 12	0 27	0 15	0 15	0 10	0 3	0 2	0 6	0 11	0 18	0 12	0 2	3 20	0 26	0 8	0 10	0 6	0 4	0 10	0 17	0 17	0 16	2 4	1 10	2 5	0 21	0 30	0 3	0 0	0 0	0 0	0 2	0 1	0 3	0 5	0 1	0 1	0 0	0 4	0 3	0 7
tig00000650	1595004	C	T	16 13	0 4	3 17	0 15	1 13	2 7	2 22	3 13	0 17	0 10	0 3	2 0	2 6	0 11	4 14	0 12	0 1	3 23	2 23	0 10	0 10	1 4	0 4	0 14	0 18	3 14	0 14	0 6	0 11	0 8	4 64	16 64	1 8	0 0	0 0	0 2	1 11	0 6	3 17	1 12	0 18	0 15	0 12	0 12	3 9	0 37
tig00000650	1595006	G	A	0 29	0 3	0 20	0 15	0 13	0 9	0 24	0 16	0 17	2 8	0 2	0 2	0 8	0 11	0 18	0 12	0 1	2 24	0 25	0 10	0 10	0 4	0 4	3 11	0 18	0 16	0 14	0 6	0 11	0 8	5 63	0 80	6 5	0 0	0 0	0 2	1 9	0 6	0 20	0 12	0 18	0 15	0 12	0 13	1 10	0 34
tig00000650	1595009	C	G	0 26	0 4	0 16	0 10	0 10	0 5	0 17	0 14	0 16	0 3	0 0	0 2	0 6	0 8	0 11	0 10	0 1	0 24	0 23	0 10	0 10	0 4	0 2	0 14	0 17	0 11	0 13	0 6	0 11	0 8	0 64	0 65	0 9	0 0	0 0	0 2	2 8	3 4	11 6	4 6	1 13	6 8	2 9	2 11	3 7	15 15
tig00000650	1595009	C	T	3 26	0 4	4 16	5 10	3 10	4 5	5 17	2 14	1 16	7 3	2 0	0 2	2 6	3 8	7 11	2 10	0 1	2 24	0 23	0 10	0 10	0 4	2 2	0 14	1 17	4 11	0 13	0 6	0 11	0 8	3 64	15 65	0 9	0 0	0 0	0 2	0 8	0 4	0 6	0 6	0 13	1 8	0 9	0 11	0 7	1 15
tig00000650	1595055	G	A	0 16	0 0	0 13	0 7	0 5	0 4	0 7	0 8	0 2	0 11	0 0	0 0	0 4	0 3	0 5	0 2	0 0	0 8	0 14	0 9	0 6	0 3	0 0	0 2	0 4	0 6	0 3	0 4	0 7	0 4	5 23	4 72	3 6	0 0	0 0	0 2	0 6	0 5	0 9	0 4	0 13	0 7	1 6	0 13	1 10	0 22
tig00000650	1595061	G	A	0 11	0 0	0 10	0 5	0 3	0 6	0 6	0 7	0 1	0 11	0 0	0 0	0 3	0 3	0 4	0 2	0 0	0 4	0 9	0 9	0 5	0 2	0 0	0 1	0 2	0 4	0 2	0 3	0 5	0 4	0 29	3 74	0 10	0 0	0 1	0 2	0 6	0 5	0 7	0 4	6 2	0 7	3 4	6 8	2 9	4 16
tig00000650	1595062	A	G	0 11	0 0	0 10	0 5	0 3	0 5	0 6	0 6	0 1	0 11	0 0	0 0	0 3	0 3	0 4	0 2	0 0	0 2	0 7	0 9	0 4	0 1	0 0	0 1	0 1	0 4	0 2	0 3	0 5	0 4	0 29	0 78	0 10	0 0	0 1	0 2	2 4	0 5	0 6	1 3	0 8	0 7	0 6	5 9	3 8	1 20
tig00000650	1595063	C	T	0 11	0 0	0 10	0 5	0 3	0 6	0 6	0 5	0 1	0 11	0 0	0 0	0 3	0 3	0 4	0 2	0 0	0 2	0 7	0 9	0 4	0 1	0 0	0 1	0 1	0 4	0 0	0 2	0 5	0 3	0 30	18 59	0 10	0 0	0 1	1 1	0 6	0 5	0 6	0 4	0 8	0 7	0 6	0 14	0 11	0 21
tig00000650	1595066	CAGG	TAGA	0 0	0 0	0 4	0 0	0 0	0 0	0 0	0 0	0 0	0 4	0 0	0 0	0 0	0 0	0 0	0 0	0 0	0 0	0 0	0 9	0 2	0 0	0 0	0 0	0 0	0 0	0 0	0 0	0 0	0 0	0 3	0 12	0 3	0 0	0 0	0 0	0 2	0 0	0 0	0 0	0 1	0 2	0 0	0 0	0 0	0 0
tig00000650	1595068	GGC	AGTG	0 0	0 0	0 4	0 0	0 0	0 0	0 0	0 0	0 0	0 4	0 0	0 0	0 0	0 0	0 0	0 0	0 0	0 0	0 0	0 9	0 2	0 0	0 0	0 0	0 0	0 0	0 0	0 0	0 0	0 0	0 3	0 12	0 3	0 0	0 0	0 0	0 2	0 0	0 0	0 0	5 1	0 2	2 0	4 0	2 0	4 0
tig00000650	1595068	G	T	0 0	0 0	0 4	0 0	0 0	0 0	0 0	0 0	0 0	0 4	0 0	0 0	0 0	0 0	0 0	0 0	0 0	0 0	0 0	0 9	0 2	0 0	0 0	0 0	0 0	0 0	0 0	0 0	0 0	0 0	0 3	3 12	0 3	0 0	0 0	0 0	2 2	0 0	0 0	1 0	0 1	0 2	0 0	5 0	1 0	1 0
tig00000650	1595070	CA	AG	0 0	0 0	0 4	0 0	0 0	0 0	0 0	0 0	0 0	0 4	0 0	0 0	0 0	0 0	0 0	0 0	0 0	0 0	0 0	0 9	0 2	0 0	0 0	0 0	0 0	0 0	0 0	0 0	0 0	0 0	0 3	0 12	0 3	0 0	0 0	0 0	1 2	0 0	0 0	0 0	0 1	0 2	0 0	0 0	0 0	2 0
tig00000650	1595071	A	G	0 0	0 0	0 4	0 0	0 0	2 0	0 0	0 0	0 0	0 4	0 0	0 0	0 0	0 0	0 0	0 0	0 0	0 0	0 0	0 9	0 2	0 0	0 0	0 0	0 0	0 0	0 0	0 0	0 0	0 0	7 3	19 12	3 3	0 0	1 0	1 0	0 2	4 0	4 0	0 0	0 1	0 2	2 0	0 0	3 0	7 0
tig00000650	1595071	AAAG	GAAA	0 0	0 0	0 4	0 0	0 0	0 0	0 0	0 0	0 0	0 4	0 0	0 0	0 0	0 0	0 0	0 0	0 0	0 0	0 0	0 9	0 2	0 0	0 0	0 0	0 0	0 0	0 0	0 0	0 0	0 0	0 3	0 12	0 3	0 0	0 0	0 0	0 2	0 0	0 0	0 0	0 1	0 2	0 0	0 0	0 0	0 0
tig00000650	1595071	AAA	GAT	0 0	0 0	0 4	0 0	0 0	0 0	0 0	0 0	0 0	0 4	0 0	0 0	0 0	0 0	0 0	0 0	0 0	0 0	0 0	0 9	0 2	0 0	0 0	0 0	0 0	0 0	0 0	0 0	0 0	0 0	0 3	0 12	0 3	0 0	0 0	0 0	0 2	0 0	0 0	0 0	0 1	2 2	0 0	0 0	0 0	0 0
tig00000650	1595082	C	T	0 1	0 0	0 4	0 0	0 0	0 0	0 0	0 0	0 0	0 4	0 1	0 1	0 1	0 0	0 2	0 0	0 0	0 2	0 0	0 10	0 2	0 0	0 1	0 1	0 0	0 0	0 1	0 1	0 1	0 0	0 19	0 63	0 7	0 0	0 1	0 1	2 1	0 4	0 4	1 1	0 12	0 4	0 8	5 12	2 11	1 16
tig00000650	1595086	G	A	0 1	0 0	0 4	0 0	0 0	5 0	0 0	0 0	0 0	0 4	0 1	0 1	0 1	0 0	0 2	0 0	0 0	0 2	0 0	0 10	0 2	0 0	0 1	0 1	0 0	0 0	0 1	0 1	0 1	0 0	0 19	1 63	0 7	0 0	0 1	0 1	1 1	0 4	0 4	0 1	0 12	0 4	0 8	0 12	0 11	2 16
tig00000650	1595087	C	T	0 1	0 0	0 4	0 0	0 0	0 5	0 0	0 0	0 0	0 4	0 1	0 1	0 1	0 0	0 2	0 0	0 0	0 2	0 0	0 12	0 2	0 0	0 1	0 1	0 0	0 0	0 1	0 1	0 1	0 0	0 28	7 67	0 9	0 0	0 1	1 0	0 7	0 4	0 4	0 2	0 16	0 6	0 9	0 19	0 13	0 21
tig00000650	1595091	CAAG	GAAC	0 1	0 0	0 4	0 0	0 0	0 5	0 0	0 0	0 0	0 4	0 1	0 1	0 1	0 0	0 2	0 0	0 0	0 2	0 0	0 12	0 2	0 0	0 1	0 2	0 0	0 0	0 1	0 1	0 1	0 0	0 21	0 71	0 4	0 0	0 1	0 1	0 3	0 2	0 3	0 1	0 16	0 3	0 8	0 14	0 13	0 13
tig00000650	1595091	C	T	0 1	0 0	0 4	0 0	0 0	0 5	0 0	0 0	0 0	0 4	0 1	0 1	0 1	0 0	0 2	0 0	0 0	0 2	0 0	0 12	0 2	0 0	0 1	0 2	0 0	0 0	0 1	0 1	0 1	0 0	0 21	0 71	2 4	0 0	0 1	0 1	1 3	0 2	1 3	0 1	0 16	1 3	0 8	0 14	0 13	4 13
tig00000650	1595092	A	G	0 1	0 0	0 4	0 0	0 0	0 5	0 0	0 0	0 0	0 4	0 1	0 1	0 1	0 0	0 2	0 0	0 0	0 2	0 0	0 12	0 2	0 0	0 1	0 2	0 0	0 0	0 1	0 1	0 1	0 0	6 21	0 71	1 4	0 0	0 1	0 1	0 3	0 2	0 3	0 1	0 16	0 3	0 8	0 14	0 13	0 13
tig00000650	1595094	G	A	0 1	0 0	0 4	0 0	0 0	0 5	0 0	0 0	0 0	0 4	0 1	0 1	0 1	0 0	0 2	0 0	0 0	0 2	0 0	0 12	0 2	0 0	0 1	0 2	0 0	0 0	0 1	0 1	0 1	0 0	0 21	0 71	0 4	0 0	0 1	0 1	0 3	0 2	0 3	1 1	0 16	0 3	0 8	3 14	1 13	0 13
tig00000650	1595095	G	A	0 1	0 0	0 5	0 0	0 0	0 6	0 0	0 0	0 0	0 4	0 2	0 1	0 1	0 0	0 2	0 0	0 0	0 2	0 0	0 13	0 2	0 0	0 1	0 2	0 0	0 0	0 0	0 1	0 1	0 0	0 25	0 72	0 9	0 0	0 1	0 1	0 7	0 4	0 4	0 2	0 17	0 4	0 9	1 17	0 15	0 19
tig00000650	1595099	G	A	0 1	0 0	0 5	0 0	0 0	0 7	0 0	0 0	0 0	0 4	0 3	0 1	0 1	0 0	0 2	0 0	0 0	0 2	0 1	0 12	0 2	0 0	0 1	0 2	0 0	0 0	0 1	0 1	0 1	0 0	0 27	0 73	0 9	0 0	0 1	0 1	2 5	0 2	0 4	1 1	0 18	0 4	0 9	3 14	1 14	1 17
tig00000650	1595103	G	A	0 1	0 0	0 6	0 0	0 0	0 7	0 0	0 0	0 0	0 4	0 3	0 1	0 1	0 0	0 2	0 0	0 0	0 2	0 1	0 13	0 2	0 0	0 1	0 2	0 0	0 0	0 1	0 1	0 1	0 0	0 27	13 60	2 6	0 0	0 1	0 1	1 6	0 2	0 4	0 2	0 18	0 4	0 10	0 19	0 15	4 15
tig00000650	1595104	A	AT	0 1	0 0	0 7	0 0	0 0	0 7	0 0	0 0	0 0	0 4	0 3	0 1	0 1	0 0	0 2	0 0	0 0	0 2	0 1	0 10	0 2	0 0	0 1	0 2	0 0	0 0	0 1	0 1	0 1	0 0	1 18	3 66	0 8	0 0	0 1	0 1	0 7	0 2	4 0	0 1	0 18	0 3	0 8	0 19	1 12	2 13
tig00000650	1595105	G	A	0 1	0 0	0 7	0 0	0 0	0 7	0 0	0 0	0 0	0 4	0 3	0 1	0 1	0 0	0 2	0 0	0 0	0 2	0 1	0 10	0 2	0 0	0 1	0 2	0 0	0 0	0 1	0 1	0 1	0 0	3 18	0 66	0 8	0 0	0 1	0 1	0 7	0 2	0 0	0 1	0 18	0 3	0 8	0 19	0 12	0 13
tig00000650	1595129	G	A	0 2	0 0	0 11	0 0	0 0	0 14	0 0	0 0	0 1	0 4	0 4	0 1	0 1	0 0	0 3	0 0	0 0	0 2	0 5	0 12	0 2	0 0	0 1	0 3	0 0	0 0	0 1	0 1	0 1	0 0	0 24	3 50	0 7	0 0	0 1	0 0	0 6	0 2	0 3	0 2	0 19	0 4	0 10	0 19	2 12	0 11
tig00000650	1595131	G	A	0 2	0 0	0 11	0 0	0 0	0 14	0 0	0 0	0 0	0 4	0 3	0 0	0 0	0 0	0 1	0 0	0 0	0 0	0 5	0 12	0 2	0 0	0 0	0 1	0 0	0 0	0 0	0 0	0 0	0 0	0 20	0 42	0 6	0 0	0 1	0 0	0 6	0 2	0 3	0 2	16 2	0 4	4 3	13 1	7 5	6 6
tig00000650	1595131	GGG	AGC	0 2	0 0	0 11	0 0	0 0	0 14	0 0	0 0	0 0	0 4	0 3	0 0	0 0	0 0	0 1	0 0	0 0	0 0	0 5	0 12	0 2	0 0	0 0	0 1	0 0	0 0	0 0	0 0	0 0	0 0	0 20	0 42	0 6	0 0	0 1	0 0	0 6	0 2	0 3	0 2	0 2	0 4	0 3	0 1	0 5	0 6
tig00000650	1595131	G	T	0 2	0 0	0 11	0 0	0 0	0 14	0 0	0 0	0 0	0 4	0 3	0 0	0 0	0 0	0 1	0 0	0 0	0 0	0 5	0 12	0 2	0 0	0 0	0 1	0 0	0 0	0 0	0 0	0 0	0 0	0 20	0 42	0 6	0 0	0 1	0 0	0 6	0 2	0 3	0 2	0 2	0 4	0 3	0 1	0 5	0 6
tig00000650	1595142	AGCCTA	CGCCTG	0 1	0 0	0 0	0 0	0 0	8 4	0 0	0 0	0 0	0 0	0 0	0 0	0 0	0 0	0 0	0 0	0 0	0 0	0 0	0 12	0 0	0 0	0 0	1 0	0 0	0 0	0 0	0 0	0 0	0 0	1 5	3 0	1 1	0 0	0 0	0 0	0 0	0 0	0 0	0 0	16 0	1 0	5 0	16 0	8 0	4 0
tig00000650	1595153	A	C	1 1	0 0	0 7	0 0	0 0	0 18	0 0	0 0	0 1	0 0	0 4	0 1	0 1	0 0	0 3	0 0	0 0	0 2	0 5	0 14	0 0	0 0	0 1	0 3	0 0	0 0	0 1	0 1	0 1	0 0	0 5	0 14	0 2	0 0	0 0	0 0	0 2	0 0	0 1	0 1	16 0	0 3	4 2	16 0	6 4	6 1
tig00000650	1595159	A	G	0 1	0 0	6 0	0 0	0 0	13 0	0 0	0 0	0 1	0 0	1 1	0 1	0 1	0 0	0 3	0 0	0 0	0 2	4 0	0 13	0 0	0 0	0 1	1 2	0 0	0 0	0 1	0 1	0 1	0 0	0 0	2 1	0 0	0 0	0 0	0 0	2 0	0 0	0 1	0 1	16 0	2 0	3 0	16 0	6 2	6 0
tig00000650	1595159	AAC	GAA	0 1	0 0	0 0	0 0	0 0	0 0	0 0	0 0	0 1	0 0	0 1	0 1	0 1	0 0	0 3	0 0	0 0	0 2	0 0	0 13	0 0	0 0	0 1	0 2	0 0	0 0	0 1	0 1	0 1	0 0	0 0	0 1	0 0	0 0	0 0	0 0	0 0	0 0	0 1	0 1	0 0	1 0	2 0	0 0	2 2	0 0
tig00000650	1595167	A	G	0 1	0 0	0 7	0 0	0 0	10 5	0 2	0 0	0 1	0 0	1 4	0 1	0 1	0 0	0 3	0 0	0 0	0 2	0 5	0 13	0 0	0 0	0 1	0 3	0 1	1 0	0 1	0 1	0 1	0 0	0 1	0 5	0 1	0 0	0 0	0 0	0 2	0 0	0 1	0 2	16 0	1 2	6 0	16 0	8 2	6 0
tig00000650	1595173	A	C	0 0	0 2	0 7	0 0	0 0	0 15	0 2	0 0	0 0	0 0	0 4	0 0	0 0	0 0	0 0	0 0	0 1	0 0	0 5	0 13	0 0	0 0	0 0	0 1	0 1	0 3	0 0	0 0	0 0	0 0	0 1	0 4	0 1	0 0	0 0	0 0	0 2	0 0	0 0	0 1	16 0	0 4	3 2	14 0	6 4	6 0
tig00000650	1595179	G	A	0 0	0 2	0 7	0 0	0 0	0 15	0 2	0 0	0 0	0 0	0 4	0 0	0 0	0 0	0 0	0 0	0 1	0 0	0 5	0 12	0 0	0 0	0 0	0 1	0 1	0 3	0 0	0 0	0 0	0 0	0 1	0 4	0 0	0 0	0 0	0 1	0 0	0 0	0 0	0 0	1 16	0 1	0 5	0 14	0 8	0 6
tig00000650	1595179	GACCG	AACCA	0 0	0 2	0 7	0 0	0 0	0 15	0 2	0 0	0 0	0 0	0 4	0 0	0 0	0 0	0 0	0 0	0 1	0 0	0 5	0 12	0 0	0 0	0 0	0 1	0 1	0 3	0 0	0 0	0 0	0 0	0 1	0 4	0 0	0 0	0 0	0 1	0 0	0 0	0 0	0 0	0 16	0 1	0 5	0 14	0 8	0 6
tig00000650	1595192	G	A	0 0	0 2	0 6	0 0	0 0	0 15	0 2	0 0	0 0	0 0	0 4	0 0	0 0	0 0	0 0	0 0	0 1	0 0	0 5	0 13	0 0	0 0	0 0	0 1	0 1	0 3	0 0	0 0	0 0	0 0	0 2	0 4	0 1	0 0	0 0	0 1	0 0	0 2	0 1	0 0	0 18	0 2	0 5	0 12	0 8	0 6
tig00000650	1595211	A	G	0 0	0 2	1 0	0 0	0 0	1 10	0 2	0 0	0 0	0 0	1 1	0 0	0 0	0 0	0 0	0 0	0 1	0 0	2 0	0 12	0 0	0 0	0 0	0 0	0 1	0 3	0 0	0 0	0 0	0 0	0 1	0 1	0 2	0 0	0 0	0 0	2 0	2 0	1 0	0 0	17 0	2 0	5 0	12 0	5 0	5 0
tig00000650	1595216	T	C	0 0	0 2	0 1	0 0	0 0	9 1	0 2	0 0	0 0	0 0	0 1	0 0	0 0	0 0	0 0	0 0	0 1	0 0	0 2	0 11	0 0	0 0	0 0	0 0	0 1	0 3	0 0	0 0	0 0	0 0	0 1	0 1	0 0	0 0	0 0	0 1	0 2	0 2	0 1	0 0	0 12	0 2	0 5	0 9	0 5	0 4
tig00000650	1595239	CGT	TGTAATGATG	0 0	0 0	0 0	0 0	0 0	0 0	0 0	0 0	0 0	0 0	0 0	0 0	0 0	0 0	0 0	0 0	0 0	0 0	0 0	0 0	0 0	0 0	0 0	0 0	0 0	0 0	0 0	0 0	0 0	0 0	0 0	0 0	0 0	0 0	0 0	0 0	0 0	0 0	0 0	0 0	0 0	0 0	0 0	0 0	0 0	0 0
tig00000650	1595240	GT	AG	0 0	0 0	0 0	0 0	0 0	0 0	0 0	0 0	0 0	0 0	0 0	0 0	0 0	0 0	0 0	0 0	0 0	0 0	0 0	9 0	0 0	0 0	0 0	0 0	0 0	0 0	0 0	0 0	0 0	0 0	0 0	0 0	3 0	0 0	0 0	0 0	0 0	0 0	0 0	0 0	0 0	0 0	0 0	0 0	0 0	0 0
tig00000650	1595240	GTAAAGA	AGAAAGG	0 0	0 0	0 0	0 0	0 0	0 0	0 0	0 0	0 0	0 0	0 0	0 0	0 0	0 0	0 0	0 0	0 0	0 0	0 0	0 0	0 0	0 0	0 0	0 0	0 0	0 0	0 0	0 0	0 0	0 0	0 0	0 0	0 0	0 0	0 0	0 0	1 0	5 0	3 0	0 0	2 0	0 0	0 0	0 0	3 0	0 0
tig00000650	1595248	A	G	0 0	0 0	0 0	0 0	0 0	0 0	0 0	0 0	0 0	0 0	0 0	0 0	0 0	0 0	0 0	0 0	0 0	0 0	0 0	0 9	0 0	0 0	0 0	0 0	0 0	0 0	0 0	0 0	0 0	0 0	0 0	0 0	0 3	0 0	0 0	0 1	0 3	0 6	0 3	0 0	0 3	1 0	0 0	0 0	0 3	0 0
tig00000650	1595249	T	C	0 0	0 0	0 0	0 0	0 0	0 0	0 0	0 0	0 0	0 0	0 0	0 0	0 0	0 0	0 0	0 0	0 0	0 0	0 0	0 10	0 0	0 0	0 0	0 0	0 0	0 0	0 0	0 0	0 0	0 0	0 0	0 0	3 0	0 0	0 0	1 0	0 3	0 5	0 3	0 0	0 3	0 1	0 0	0 0	0 3	0 0
tig00000650	1595280	G	A	0 0	0 1	0 0	0 0	0 0	0 0	0 0	0 0	0 0	0 0	0 0	0 0	0 0	0 0	0 0	0 0	0 0	0 0	0 0	0 10	0 0	0 0	0 0	0 0	0 0	0 0	0 0	0 0	0 0	0 0	0 0	0 1	3 0	0 0	0 1	0 3	0 6	0 13	0 9	0 3	0 13	0 1	0 1	0 2	0 9	0 1
tig00000650	1595298	T	C	0 0	0 1	0 0	0 0	0 0	0 0	0 0	0 0	0 0	0 0	0 0	0 0	0 0	0 0	0 0	0 0	0 0	0 0	0 0	0 10	0 0	0 0	0 0	0 0	0 0	0 0	0 0	0 0	0 1	0 0	0 0	0 1	3 0	0 0	0 1	0 0	1 6	1 12	0 10	1 2	5 9	0 0	1 0	3 0	1 12	1 1
tig00000650	1595326	GTA	AGC	0 0	0 0	0 0	0 0	0 0	0 0	0 0	0 0	0 0	0 0	0 0	0 0	0 0	0 0	0 0	0 0	0 0	0 0	0 0	0 10	0 0	0 0	0 0	0 0	0 0	0 0	0 0	0 0	0 0	0 0	0 0	0 0	0 0	0 0	0 0	0 0	3 0	7 0	5 0	0 0	4 0	2 0	1 0	0 0	10 0	1 0
tig00000650	1595327	TA	GC	0 0	0 0	0 0	0 0	0 0	0 0	0 0	0 0	0 0	0 0	0 0	0 0	0 0	0 0	0 0	0 0	0 0	0 0	0 0	0 10	0 0	0 0	0 0	0 0	0 0	0 0	0 0	0 0	0 0	0 0	0 0	0 0	3 0	0 0	1 0	3 0	0 0	0 0	0 0	1 0	0 0	0 0	0 0	0 0	0 0	0 0
tig00000650	1595327	TAAG	GCAA	0 0	0 0	0 0	0 0	0 0	0 0	0 0	0 0	0 0	0 0	0 0	0 0	0 0	0 0	0 0	0 0	0 0	0 0	0 0	0 10	0 0	0 0	0 0	0 0	0 0	0 0	0 0	0 0	0 0	0 0	0 0	0 0	0 0	0 0	0 0	0 0	0 0	0 0	1 0	1 0	4 0	0 0	2 0	3 0	2 0	1 0
tig00000650	1595338	C	T	0 7	0 3	0 11	0 6	0 6	0 7	0 1	0 5	0 9	0 2	0 2	0 0	0 5	0 4	0 6	0 1	0 4	0 1	0 7	0 10	0 0	0 1	0 0	0 0	0 3	0 4	0 1	0 1	0 1	0 2	1 9	0 16	0 2	0 0	0 2	2 1	0 8	0 18	1 15	1 6	0 21	2 8	0 11	0 10	0 26	1 8
tig00000650	1595345	C	G	0 4	0 3	0 16	0 9	1 8	1 7	0 1	0 3	0 12	0 2	0 2	0 0	0 5	0 6	0 7	1 2	0 6	0 2	0 7	0 8	0 2	0 2	0 2	0 2	0 3	1 2	0 3	0 1	0 2	0 3	0 14	3 12	0 4	0 0	0 1	0 1	0 10	0 22	1 16	1 4	0 15	0 9	2 9	4 4	2 21	1 9
tig00000650	1595352	G	A	0 4	0 3	0 16	0 9	0 8	0 7	0 1	1 3	0 12	0 2	0 2	0 0	0 5	0 6	0 7	0 2	0 6	0 2	2 7	0 8	0 2	1 2	0 2	0 2	0 3	0 2	0 3	0 1	0 2	0 3	0 14	3 12	0 4	0 0	0 1	2 1	0 10	0 22	0 16	0 4	0 15	0 9	0 9	0 4	0 21	0 9
tig00000650	1595353	T	C	0 23	0 3	0 27	0 18	0 25	0 22	0 10	0 13	0 32	0 11	0 3	0 0	0 9	0 15	0 10	0 14	0 14	0 4	0 24	0 9	0 3	0 6	0 3	0 4	0 16	0 20	0 7	0 3	0 2	0 5	0 24	0 37	0 6	0 1	0 1	0 3	0 12	0 22	0 17	0 7	5 17	0 10	0 12	1 10	3 22	2 13
tig00000650	1595416	AA	CAACG	0 52	0 18	0 43	0 25	0 35	0 43	0 39	0 29	0 60	0 42	0 9	0 0	0 16	0 35	0 13	0 36	0 35	0 8	0 60	0 4	0 16	0 13	0 6	0 12	0 61	0 55	0 15	0 3	0 7	0 10	0 43	0 58	0 6	0 1	0 1	0 1	3 0	11 2	7 2	2 4	7 10	5 3	5 6	2 6	8 15	5 8
tig00000650	1595418	G	A	0 52	0 18	0 43	0 25	0 35	0 43	0 39	0 29	0 60	0 42	0 9	0 0	0 16	0 35	0 13	0 36	0 35	0 8	0 60	0 4	0 16	0 13	0 6	0 12	0 61	0 55	0 15	0 3	0 7	0 10	3 43	8 58	0 6	0 1	0 1	0 1	0 0	0 2	0 2	0 4	0 10	0 3	0 6	0 6	0 15	0 8
tig00000650	1595420	C	T	3 52	2 18	0 43	1 25	2 35	1 43	1 39	4 29	0 60	2 42	0 9	0 0	0 16	2 35	0 13	1 36	1 35	0 8	3 60	0 4	1 16	0 13	1 6	0 12	1 61	1 55	1 15	0 3	0 7	0 10	2 43	0 58	0 6	0 1	0 1	0 1	0 0	1 2	0 2	0 4	0 10	0 3	0 6	0 6	0 15	2 8
tig00000650	1595421	G	A	0 52	0 18	2 43	0 25	0 35	1 43	0 39	0 29	0 60	0 42	2 9	0 0	0 16	0 35	3 13	0 36	0 35	1 8	2 60	0 4	3 16	0 13	3 6	0 12	0 61	0 55	1 15	0 3	0 7	0 10	0 43	2 58	0 6	0 1	0 1	0 1	0 0	0 2	0 2	0 4	0 10	0 3	1 6	0 6	0 15	0 8
tig00000650	1595424	G	A	0 52	0 18	0 43	0 25	0 35	0 43	0 39	0 29	0 60	0 42	0 9	0 0	0 16	0 35	0 13	0 36	0 35	0 8	0 60	0 4	0 16	0 13	0 6	0 12	0 61	0 55	0 15	0 3	0 7	0 10	4 43	0 58	0 6	0 1	0 1	2 1	0 0	0 2	0 2	0 4	1 10	0 3	0 6	0 6	0 15	0 8
tig00000650	1595431	TAG	T	3 15	2 11	7 16	1 12	5 19	6 20	6 13	5 15	6 36	2 22	2 7	0 0	3 6	9 10	2 12	4 24	3 28	0 5	6 17	0 4	6 7	2 9	0 11	2 5	8 30	7 19	4 10	0 2	1 3	3 2	11 13	6 30	0 5	0 1	0 0	0 3	0 6	0 16	0 6	2 2	1 10	0 11	2 8	0 2	3 11	1 6
tig00000650	1595435	G	A	0 15	0 11	0 16	0 12	0 19	0 20	0 13	0 15	0 36	0 22	0 7	0 0	0 6	0 10	0 12	0 24	0 28	0 5	0 17	0 4	0 7	0 9	0 11	0 5	0 30	0 19	0 10	0 2	0 3	0 2	0 13	0 30	0 5	0 1	0 0	0 3	0 6	0 16	1 6	1 2	0 10	0 11	1 8	2 2	0 11	0 6
tig00000650	1595458	G	A	0 30	4 12	0 19	1 12	0 17	2 20	3 20	0 10	0 26	0 27	0 6	0 0	1 6	0 28	0 11	1 20	0 22	0 4	0 31	0 4	0 15	0 4	0 8	1 3	0 38	0 19	0 7	0 0	0 3	0 6	0 15	1 17	0 3	0 1	0 0	0 0	5 0	15 0	6 1	1 3	8 2	8 1	5 2	3 0	8 4	8 1
tig00000650	1595458	G	T	0 30	1 12	1 19	0 12	0 17	0 20	0 20	0 10	0 26	1 27	0 6	0 0	0 6	3 28	0 11	1 20	3 22	1 4	1 31	0 4	0 15	0 4	1 8	0 3	0 38	1 19	0 7	0 0	0 3	0 6	2 15	0 17	3 3	0 1	0 0	0 0	0 0	1 0	0 1	0 3	0 2	2 1	0 2	0 0	1 4	1 1
tig00000650	1595465	T	C	2 0	0 0	3 0	0 0	3 0	0 0	1 0	1 0	1 0	2 0	1 0	0 0	1 0	0 1	3 0	1 0	2 0	1 0	3 0	0 4	2 0	0 0	3 0	0 0	3 0	0 0	1 0	0 0	0 0	0 0	5 0	1 0	0 0	0 0	0 0	0 0	2 2	5 9	4 0	2 0	7 0	4 0	4 0	2 0	4 0	4 0
tig00000650	1595472	G	A	0 8	0 5	0 6	0 2	0 4	0 4	0 5	0 1	0 2	0 7	0 1	0 0	0 1	0 5	0 4	0 9	0 8	0 2	0 9	0 3	0 4	0 2	0 4	0 1	0 16	0 2	0 1	0 0	0 1	0 0	0 4	0 6	0 6	0 1	0 0	0 0	0 5	0 15	0 2	0 0	0 9	0 6	0 5	0 3	0 11	0 7
tig00000650	1595475	CGTCG	AGCCA	0 0	0 0	0 0	0 0	0 0	0 0	0 0	0 0	0 0	0 0	0 0	0 0	0 0	0 1	0 0	0 0	0 0	0 0	0 1	0 3	0 0	0 0	0 0	0 0	0 0	0 0	0 0	0 0	0 0	0 0	0 0	0 0	0 0	0 1	0 0	0 0	1 0	6 0	0 0	0 0	0 0	2 0	1 0	0 0	0 0	0 0
tig00000650	1595480	C	T	0 0	0 0	0 1	0 0	0 0	0 0	0 1	0 0	0 0	0 0	0 0	0 0	0 0	1 0	0 1	0 0	0 0	0 0	1 0	0 3	0 0	0 0	0 0	0 0	0 0	0 2	0 0	0 0	0 0	0 0	0 1	0 3	0 3	1 0	0 0	0 0	0 1	0 7	0 0	0 0	0 1	0 2	0 1	0 0	0 3	1 0
tig00000650	1595485	C	T	0 0	0 0	0 0	0 0	0 0	0 0	0 1	0 0	0 0	0 0	0 0	0 0	0 0	0 1	0 1	0 0	0 0	0 0	0 0	0 3	0 0	0 0	0 0	0 0	0 0	0 1	0 0	0 0	0 0	0 0	0 0	0 3	0 3	0 1	0 1	0 0	1 0	7 0	0 0	0 0	1 0	2 0	1 0	0 0	0 3	0 1
tig00000650	1595492	C	T	0 0	0 0	0 0	0 0	0 0	0 0	0 0	0 0	0 0	0 0	0 0	0 0	0 0	0 0	0 0	0 0	0 0	0 0	0 0	0 2	0 0	0 0	0 0	0 0	0 0	0 0	0 0	0 0	0 0	0 0	0 0	0 3	0 3	0 1	0 1	0 0	0 1	0 7	0 0	0 0	0 1	0 2	0 1	0 0	2 1	0 1
tig00000650	1595501	C	CT	0 0	0 0	0 0	0 0	0 0	0 0	0 0	0 0	0 0	0 0	0 0	0 0	0 0	0 0	0 0	0 0	0 0	0 0	0 0	1 0	0 0	0 0	0 0	0 0	0 0	0 0	0 0	0 0	0 0	0 0	0 0	0 0	0 0	0 0	0 0	0 0	0 0	3 0	0 0	0 0	1 0	2 0	0 0	0 0	0 0	0 0
tig00000650	1595502	GAG	TTA	0 0	0 0	0 0	0 0	0 0	0 0	0 0	0 0	0 0	0 0	0 0	0 0	0 0	0 0	0 0	0 0	0 0	0 0	0 0	0 0	0 0	0 0	0 0	0 0	0 0	0 0	0 0	0 0	0 0	0 0	0 0	0 0	1 0	0 0	1 0	0 0	0 0	0 0	0 0	0 0	0 0	0 0	0 0	0 0	0 0	0 0
tig00000650	1595516	T	A	0 0	0 0	0 0	2 0	0 0	5 0	0 0	0 0	0 0	8 0	0 3	0 0	0 0	0 0	0 0	0 0	9 0	1 0	0 0	0 4	0 0	0 0	3 0	1 0	0 0	2 0	1 3	2 2	1 3	1 0	0 2	0 0	0 0	0 0	0 0	0 0	0 0	0 0	0 0	0 0	0 0	0 0	0 0	0 0	0 0	0 0
tig00000650	1595536	G	A	0 2	0 1	0 0	0 3	0 0	0 10	0 0	0 0	0 2	0 9	0 0	0 1	0 0	0 0	0 0	0 1	0 10	0 4	0 1	0 6	0 0	0 0	0 9	0 4	0 0	0 8	0 1	0 2	0 5	0 3	0 2	0 0	2 1	0 0	0 1	0 0	0 0	2 1	0 0	0 0	0 0	0 0	0 0	0 0	0 0	0 0
tig00000650	1595546	AC	A	0 2	0 1	0 0	2 1	0 0	6 1	0 0	0 0	0 2	7 1	0 3	0 0	0 0	0 0	0 0	0 1	9 0	2 0	0 1	0 6	0 0	0 0	3 0	1 0	0 0	3 1	1 3	1 2	1 3	1 0	0 0	0 0	0 0	0 0	0 0	0 0	0 0	0 0	0 0	0 0	0 0	0 0	0 0	0 0	0 0	0 0
tig00000650	1595706	C	G	0 0	0 0	0 0	0 0	0 0	0 0	0 0	0 0	0 0	0 0	0 0	0 0	0 0	0 0	0 0	0 0	0 0	0 0	0 0	0 5	0 0	0 0	0 0	0 0	0 0	0 0	0 0	0 0	0 0	0 0	1 0	3 0	0 0	0 0	0 0	0 0	0 0	0 0	0 0	0 0	0 0	0 0	0 0	0 0	0 0	0 0
tig00000650	1595706	CG	GA	0 0	0 0	0 0	0 0	0 0	0 0	0 0	0 0	0 0	0 0	0 0	0 0	0 0	0 0	0 0	0 0	0 0	0 0	0 0	1 5	0 0	0 0	0 0	0 0	0 0	0 0	0 0	0 0	0 0	0 0	1 0	0 0	0 0	0 0	0 0	0 0	0 0	0 0	0 0	0 0	0 0	0 0	0 0	0 0	0 0	0 0
tig00000650	1595706	C	T	0 0	0 0	0 0	0 0	0 0	0 0	0 0	0 0	0 0	0 0	0 0	0 0	0 0	0 0	0 0	0 0	0 0	0 0	0 0	0 5	0 0	0 0	0 0	0 0	0 0	0 0	0 0	0 0	0 0	0 0	2 0	5 0	0 0	0 0	0 0	0 0	0 0	0 0	0 0	0 0	0 0	0 0	0 0	0 0	0 0	0 0
tig00000650	1595747	CG	C	0 0	0 0	0 0	0 0	0 0	0 0	0 0	0 0	0 0	0 0	0 0	0 0	0 0	0 0	0 0	0 0	0 0	0 0	0 0	2 0	0 0	0 0	0 0	0 0	0 0	0 0	0 0	0 0	0 0	0 0	0 0	1 0	0 0	0 0	0 0	0 0	0 0	0 0	0 0	0 0	0 0	0 0	0 0	0 0	0 0	0 0
tig00000650	1595762	G	A	0 0	0 0	0 0	0 0	0 0	0 0	0 0	0 0	0 0	0 0	0 0	0 0	0 0	0 0	0 0	0 0	0 0	0 0	0 0	2 0	0 0	0 0	0 0	0 0	0 0	0 0	0 0	0 0	0 0	0 0	0 0	1 0	0 0	0 0	0 0	0 0	0 0	0 0	0 0	0 0	0 0	0 0	0 0	0 0	0 0	0 0
tig00000650	1595825	G	A	0 0	0 0	0 0	0 0	0 0	0 0	0 0	0 0	0 0	0 0	0 0	0 0	0 0	0 0	0 0	0 0	0 0	0 0	0 0	3 0	0 0	0 0	0 0	0 0	0 0	0 0	0 0	0 0	0 0	0 0	1 0	2 0	0 0	0 0	0 0	0 0	0 0	0 0	0 0	0 0	0 0	0 0	0 0	0 0	0 0	0 0
tig00000650	1595825	GG	ACAA	0 0	0 0	0 0	0 0	0 0	0 0	0 0	0 0	0 0	0 0	0 0	0 0	0 0	0 0	0 0	0 0	0 0	0 0	0 0	0 0	0 0	0 0	0 0	0 0	0 0	0 0	0 0	0 0	0 0	0 0	0 0	0 0	0 0	0 0	0 0	0 0	0 0	0 0	0 0	0 0	0 0	0 0	0 0	0 0	0 0	0 0
tig00000650	1595840	A	G	0 0	0 0	0 0	0 0	0 0	0 0	0 0	0 0	0 0	0 0	0 0	0 0	0 0	0 0	0 0	0 0	0 0	0 0	0 0	0 5	0 0	0 0	0 0	0 0	0 0	0 0	0 0	0 0	0 0	0 0	0 1	0 5	0 0	0 0	0 0	0 0	0 0	0 0	0 0	0 0	0 0	0 0	0 0	0 0	0 0	0 0
tig00000650	1595920	T	C	0 0	0 0	0 0	0 0	0 0	0 0	0 0	0 0	0 0	0 0	0 0	0 0	0 0	0 0	0 0	0 0	0 0	0 0	0 0	0 11	0 0	0 0	0 0	0 0	0 0	0 0	0 0	0 0	0 0	0 0	0 0	0 0	0 0	0 0	0 0	0 0	0 0	0 0	0 0	0 0	0 0	0 0	0 0	0 0	0 0	0 0
tig00000650	1595922	G	T	0 0	0 0	0 0	0 0	0 0	0 0	0 0	0 0	0 0	0 0	0 0	0 0	0 0	0 0	0 0	0 0	0 0	0 0	0 0	0 12	0 0	0 0	0 0	0 0	0 0	0 0	0 0	0 0	0 0	0 0	0 0	0 0	0 0	0 0	0 0	0 0	0 0	0 0	0 0	0 0	0 0	0 0	0 0	0 0	0 0	0 0
tig00000650	1595929	C	G	0 0	0 0	0 0	0 0	0 0	0 0	0 0	0 0	0 0	0 0	0 0	0 0	0 0	0 0	0 0	0 0	0 0	0 0	0 0	0 12	0 0	0 0	0 0	0 0	0 0	0 0	0 0	0 0	0 0	0 0	0 0	0 0	0 0	0 0	0 0	0 0	0 0	0 0	0 0	0 0	0 0	0 0	0 0	1 0	0 0	0 0
tig00000650	1595929	CTAAG	GTAAA	0 0	0 0	0 0	0 0	0 0	0 0	0 0	0 0	0 0	0 0	0 0	0 0	0 0	0 0	0 0	0 0	0 0	0 0	0 0	0 12	0 0	0 0	0 0	0 0	0 0	0 0	0 0	0 0	0 0	0 0	0 0	0 0	0 0	0 0	0 0	0 0	0 0	0 0	0 0	0 0	0 0	0 0	0 0	0 0	0 0	0 0
tig00000650	1595939	G	A	0 0	0 0	0 0	0 0	0 2	0 0	0 0	0 0	0 1	0 0	0 0	0 2	0 0	0 0	0 0	0 0	0 0	0 1	0 0	0 13	0 0	0 2	0 0	0 0	1 1	0 0	0 0	0 1	0 0	0 1	0 1	0 4	0 1	0 0	0 0	0 0	0 3	0 0	0 0	0 1	0 0	0 0	0 1	0 4	0 2	0 2
tig00000650	1595954	T	C	3 0	0 0	0 0	4 0	8 0	2 0	1 0	1 0	3 0	5 0	0 0	0 4	0 0	1 0	0 0	3 1	4 0	0 2	0 0	0 12	0 0	1 2	0 0	0 0	5 0	0 0	0 2	0 2	0 0	0 3	1 0	0 7	2 0	0 0	0 0	0 0	4 0	0 0	0 0	1 0	0 0	0 0	0 0	2 2	5 0	2 0
tig00000650	1595968	A	G	0 3	0 0	0 2	0 6	0 14	0 4	0 2	0 2	0 5	0 9	0 1	0 4	0 0	0 3	0 0	0 6	0 6	0 2	0 2	0 10	0 0	0 4	0 0	0 0	0 7	0 0	0 2	0 2	0 0	0 4	0 7	0 15	0 2	0 1	0 0	0 0	0 5	0 4	0 3	0 7	0 0	0 6	0 4	0 5	0 7	0 2
tig00000650	1595972	CCT	ATA	0 3	0 0	0 1	0 5	0 11	0 4	0 2	0 1	0 5	0 9	0 1	0 2	0 0	0 3	0 0	0 4	0 4	0 0	0 2	0 9	0 0	0 2	0 0	0 0	0 7	0 0	0 2	0 0	0 0	0 0	0 9	0 10	0 2	0 0	0 0	0 0	0 8	0 4	0 3	0 9	0 0	0 8	0 6	0 9	0 10	0 3
tig00000650	1595975	G	A	0 3	0 0	0 2	0 6	0 13	0 4	0 2	0 2	0 5	0 9	0 1	0 4	0 0	0 3	0 0	0 6	0 6	0 2	0 2	0 10	0 0	0 4	0 0	0 0	0 7	0 0	0 2	0 2	0 0	0 4	0 12	3 15	0 2	0 1	0 0	0 0	0 9	0 6	0 5	0 9	0 1	0 9	0 7	0 9	0 12	0 4
tig00000650	1595975	G	C	0 3	0 0	0 2	0 6	0 13	0 4	0 2	0 2	0 5	0 9	0 1	0 4	0 0	0 3	0 0	0 6	0 6	0 2	0 2	0 10	0 0	0 4	0 0	0 0	0 7	0 0	0 2	0 2	0 0	0 4	0 12	0 15	0 2	0 1	0 0	0 0	0 9	0 6	0 5	0 9	0 1	0 9	0 7	0 9	0 12	0 4
tig00000650	1595976	G	A	0 3	0 0	0 2	0 6	0 14	0 4	0 2	0 2	0 5	0 9	0 1	0 4	0 0	0 3	0 0	0 6	0 6	0 2	0 2	0 10	0 0	0 4	0 0	0 0	0 7	0 0	0 2	0 2	0 0	0 4	0 12	0 18	0 2	0 1	0 0	0 0	0 9	0 7	0 5	3 6	0 1	2 8	0 7	1 8	5 6	0 4
tig00000650	1595980	A	G	0 3	0 0	0 2	0 6	0 14	0 4	0 2	0 2	0 5	0 9	0 1	0 4	0 0	0 3	0 0	0 6	0 6	0 2	0 2	0 9	0 0	0 4	0 0	0 0	0 7	0 0	0 2	0 2	0 0	0 4	0 12	0 21	0 2	0 1	0 0	0 0	0 9	0 7	0 7	0 9	0 1	0 13	0 9	0 11	0 15	0 5
tig00000650	1595986	C	T	0 3	0 0	0 2	0 4	0 14	0 4	0 2	0 2	0 5	0 9	0 1	0 2	0 0	0 3	0 0	0 6	0 6	0 2	0 2	0 9	0 0	0 4	0 0	0 0	0 5	0 0	0 0	0 2	0 0	0 4	0 11	0 20	0 2	0 1	0 0	0 0	0 8	0 7	0 8	0 9	0 1	0 16	0 9	0 11	0 16	0 5
tig00000650	1595999	G	A	0 3	0 0	0 2	0 6	0 13	0 4	0 2	0 2	0 5	0 9	0 1	0 4	0 0	0 3	0 0	0 6	0 6	0 2	0 2	0 10	0 0	0 4	0 0	0 0	0 7	0 0	0 2	0 2	0 0	0 4	1 12	0 29	0 2	0 1	0 0	0 0	0 13	0 11	0 9	0 10	0 1	0 18	0 10	0 15	0 24	0 8
tig00000650	1596007	C	T	0 3	0 0	0 1	0 6	0 13	0 4	0 2	0 2	0 5	0 9	0 1	0 4	0 0	0 3	0 0	0 5	0 6	0 2	0 2	0 10	0 0	0 3	0 0	0 0	0 7	0 0	0 2	0 2	0 0	0 4	0 13	2 29	1 2	0 0	0 0	0 0	0 14	0 11	0 9	0 11	0 1	0 18	0 10	0 15	0 25	0 8
tig00000650	1596008	G	A	0 3	0 0	0 1	0 6	0 13	0 4	0 2	0 2	0 5	0 9	0 1	0 4	0 0	0 3	0 0	0 5	0 6	0 2	0 2	0 10	0 0	0 3	0 0	0 0	0 7	0 0	0 2	0 2	0 0	0 4	5 8	2 30	0 4	0 1	0 0	0 0	0 14	0 11	0 9	0 11	0 1	0 18	0 9	0 15	0 25	0 8
tig00000650	1596018	TGA	T	0 3	0 1	0 4	0 6	0 13	0 7	0 3	0 4	0 5	0 10	0 3	0 5	0 0	0 3	0 8	0 8	0 10	0 2	0 5	0 8	0 0	0 3	0 1	0 0	0 7	0 1	0 3	0 3	0 0	0 4	0 19	0 24	0 4	0 1	0 0	0 0	0 18	0 11	0 9	0 11	0 1	0 18	0 10	0 12	0 28	0 8
tig00000650	1596019	G	A	0 3	0 1	0 4	0 6	0 13	0 7	0 3	0 4	0 5	0 10	0 3	0 5	0 0	0 3	0 8	0 8	0 10	0 2	0 5	0 8	0 0	0 3	0 1	0 0	0 7	0 1	0 3	0 3	0 0	0 4	0 19	6 24	0 4	0 1	0 0	0 0	0 18	0 11	0 9	0 11	0 1	0 18	0 10	4 12	0 28	0 8
tig00000650	1596029	G	A	0 8	0 2	0 7	0 9	0 14	0 8	0 3	0 5	0 7	0 11	0 9	0 4	0 2	0 6	0 12	0 11	0 16	0 2	0 6	0 6	0 0	0 8	0 3	0 3	0 10	0 1	0 4	0 3	0 1	0 6	6 13	5 29	0 4	0 1	0 0	0 0	0 18	0 11	0 9	0 11	0 1	0 19	0 11	0 20	0 30	0 8
tig00000650	1596034	T	A	0 10	0 3	0 8	0 16	0 21	0 12	0 5	0 10	0 10	0 14	0 9	0 4	0 5	0 7	0 20	0 15	0 27	0 3	0 8	0 5	0 1	0 9	0 4	0 5	0 13	0 6	0 6	0 3	0 1	0 6	0 22	0 44	0 4	0 1	0 0	0 0	0 18	0 13	0 9	0 12	0 1	0 20	0 11	0 21	0 30	0 9
tig00000650	1596035	G	A	3 7	0 3	0 9	2 15	4 18	2 10	0 5	0 10	2 7	0 14	0 9	0 5	0 5	0 7	0 20	4 11	2 25	0 3	0 8	0 5	0 2	0 9	0 4	0 6	2 11	0 7	0 6	0 3	0 1	0 6	0 23	0 47	0 4	0 1	0 0	0 0	0 17	0 13	0 9	0 12	0 1	0 20	0 11	0 22	0 29	0 9
tig00000650	1596037	C	T	0 11	0 2	0 7	0 16	0 13	2 12	0 3	0 9	0 8	0 14	0 9	0 3	0 0	0 6	0 21	0 14	1 23	0 3	0 8	0 5	0 2	0 9	0 2	0 5	0 12	0 7	0 6	0 1	0 0	0 0	0 20	1 41	0 3	0 0	0 0	0 0	8 0	9 0	6 0	6 0	1 0	14 0	8 0	7 8	17 0	8 0
tig00000650	1596037	CTG	TTA	0 11	0 2	0 7	0 16	3 13	0 12	0 3	0 9	0 8	0 14	0 9	0 3	0 0	0 6	0 21	0 14	0 23	0 3	0 8	0 5	0 2	0 9	0 2	0 5	0 12	0 7	0 6	0 1	0 0	0 0	0 20	0 41	0 3	1 0	0 0	0 0	0 0	0 0	0 0	0 0	0 0	0 0	0 0	0 8	0 0	0 0
tig00000650	1596041	C	T	0 11	0 2	0 7	0 16	0 13	0 12	0 3	0 9	0 8	0 14	0 9	0 3	0 0	0 6	0 21	0 14	0 23	0 3	0 8	0 5	0 2	0 9	0 2	0 5	0 12	0 7	0 6	0 1	0 0	0 0	0 20	3 41	0 3	0 0	0 0	0 0	0 0	0 0	0 0	0 0	0 0	0 0	0 0	0 8	0 0	0 0
tig00000650	1596043	C	T	0 11	0 2	0 7	0 16	0 13	0 12	0 3	0 9	0 8	0 14	0 9	0 3	0 0	0 6	0 21	0 14	0 23	0 3	0 8	0 5	0 2	0 9	0 2	0 5	0 12	0 7	0 6	1 1	0 0	3 0	1 20	0 41	0 3	0 0	0 0	0 0	0 0	0 0	0 0	0 0	0 0	0 0	0 0	0 8	1 0	0 0
tig00000650	1596048	G	A	0 10	0 3	0 8	0 14	0 14	0 12	0 3	0 9	0 7	0 12	0 3	0 2	0 5	0 7	0 20	0 11	0 22	0 3	0 8	0 5	0 2	0 6	0 3	0 6	0 10	0 7	0 2	0 2	0 1	0 2	0 25	23 27	0 4	0 1	0 0	0 0	0 18	0 15	0 10	0 14	0 1	0 20	0 11	0 22	0 30	0 9
tig00000650	1596049	G	A	0 10	0 3	0 8	0 14	0 14	0 12	0 3	0 9	0 7	0 12	2 3	0 2	0 5	0 7	0 20	0 11	0 22	0 3	0 8	0 5	0 2	1 6	0 3	0 6	0 10	0 7	0 2	0 2	0 1	0 2	0 25	0 27	0 4	0 1	0 0	0 0	0 18	0 15	0 10	0 14	0 1	0 20	0 11	0 22	0 30	0 9
tig00000650	1596056	C	T	0 0	0 0	0 0	0 0	0 0	0 0	0 0	0 0	0 0	0 0	0 0	0 0	0 0	0 1	0 0	0 0	0 0	0 0	0 0	0 5	0 0	0 0	0 0	0 0	0 0	0 0	0 0	0 0	0 0	0 0	0 10	0 10	0 2	0 0	0 0	0 0	0 0	0 0	0 0	0 0	0 0	0 0	0 0	0 0	0 0	0 0
tig00000650	1596058	A	T	0 0	0 0	0 0	2 0	2 0	3 0	0 0	0 0	0 0	0 0	2 0	0 0	0 0	0 1	0 0	3 0	2 0	0 0	1 0	0 5	0 0	1 0	0 0	0 0	0 0	2 0	0 0	0 0	0 0	0 0	1 10	10 10	1 2	0 0	0 0	0 0	0 0	0 0	0 0	0 0	0 0	0 0	0 0	5 0	0 0	0 0
tig00000650	1596058	ATTGAG	TTTGAA	1 0	0 0	1 0	2 0	4 0	0 0	2 0	0 0	1 0	0 0	0 0	0 0	0 0	0 1	0 0	0 0	3 0	0 0	0 0	0 5	0 0	0 0	1 0	3 0	1 0	2 0	1 0	0 0	0 0	0 0	0 10	0 10	0 2	0 0	0 0	0 0	0 0	0 0	0 0	0 0	0 0	0 0	0 0	0 0	0 0	0 0
tig00000650	1596058	ATTGAGGGGGTGTTG	TTTGAGGGGGTGTTA	0 0	0 0	0 0	0 0	3 0	2 0	0 0	0 0	0 0	0 0	0 0	0 0	0 0	0 1	0 0	0 0	0 0	0 0	0 0	0 5	0 0	0 0	0 0	0 0	0 0	0 0	0 0	0 0	0 0	0 0	0 10	0 10	1 2	0 0	0 0	0 0	4 0	3 0	0 0	2 0	1 0	12 0	2 0	2 0	18 0	0 0
tig00000650	1596058	ATTGAGGGGGTGTTG	TTTGAGGGGTGTTA	0 0	0 0	0 0	0 0	0 0	0 0	0 0	0 0	0 0	0 0	0 0	0 0	0 0	0 1	0 0	0 0	0 0	0 0	0 0	0 5	0 0	0 0	0 0	0 0	0 0	0 0	0 0	0 0	0 0	0 0	0 10	0 10	0 2	0 0	0 0	0 0	2 0	7 0	5 0	1 0	0 0	0 0	3 0	7 0	3 0	6 0
tig00000650	1596075	A	T	8 0	2 1	6 3	6 6	7 6	3 8	2 2	0 8	5 3	0 6	8 0	2 0	2 5	1 4	7 18	5 6	11 10	2 3	6 2	0 7	1 1	3 7	4 2	5 6	7 1	4 5	4 7	2 0	1 4	2 3	0 14	0 34	1 3	0 1	0 0	0 0	0 15	0 15	0 12	0 13	0 1	0 20	0 12	0 21	0 32	0 14
tig00000650	1596081	GGTGT	TATGC	0 8	0 3	0 9	0 12	0 11	0 12	0 4	0 8	0 8	0 5	0 9	0 2	0 5	0 5	0 24	0 11	0 21	0 3	0 8	0 6	0 2	0 8	0 5	0 7	0 8	0 9	0 4	0 2	0 2	0 2	0 13	11 9	0 3	0 1	0 0	0 0	0 15	0 15	0 11	0 13	0 1	0 20	0 11	0 14	0 29	0 7
tig00000650	1596082	G	A	0 8	0 3	1 9	0 12	0 11	0 12	1 4	0 8	0 8	0 5	0 9	0 2	0 5	0 5	0 24	0 11	0 21	0 3	0 8	0 6	0 2	0 8	1 5	1 7	0 8	0 9	0 4	0 2	0 2	0 2	0 13	0 9	1 3	0 1	0 0	0 0	0 15	0 15	1 11	0 13	0 1	0 20	0 11	5 14	0 29	0 7
tig00000650	1596134	T	G	1 5	0 2	2 6	2 2	1 6	2 3	0 3	0 3	4 1	0 6	0 1	1 0	0 1	0 2	1 5	1 0	0 1	0 0	1 4	0 10	1 4	1 0	1 3	2 0	1 3	3 9	0 8	0 0	1 1	0 0	1 0	0 0	4 0	1 0	0 0	0 0	9 0	6 0	4 0	5 0	2 0	5 0	3 0	8 0	16 0	4 0
tig00000650	1596141	T	CAG	0 5	0 2	0 5	0 2	0 6	0 4	0 2	0 2	0 1	0 6	0 1	0 1	0 5	0 1	0 4	0 0	0 1	0 3	0 6	0 10	0 4	0 2	0 4	0 8	0 3	0 6	0 14	0 1	0 5	0 3	0 0	0 1	1 2	0 1	0 0	0 0	1 0	4 0	1 3	2 0	0 2	2 1	1 1	3 1	5 7	1 7
tig00000650	1596149	C	T	0 5	0 2	0 7	0 3	0 6	0 3	1 3	1 3	1 5	0 6	1 1	0 1	0 5	1 1	0 5	0 1	0 1	0 3	0 7	0 10	0 4	0 3	0 5	0 9	0 4	3 8	0 15	0 0	0 6	0 3	0 0	0 1	0 4	0 1	0 0	0 0	1 3	2 2	1 3	3 1	0 2	0 6	0 2	1 7	5 11	1 7
tig00000650	1596153	G	A	0 5	0 2	0 7	0 3	0 6	0 4	0 4	0 4	0 6	0 6	0 2	0 1	0 5	0 2	0 4	0 1	0 1	0 3	1 6	0 10	0 5	0 3	0 5	0 9	0 4	0 11	0 14	0 1	0 6	0 3	0 0	0 1	0 4	0 1	0 0	0 0	3 1	1 3	0 3	0 4	0 2	4 2	0 2	1 7	6 9	1 7
tig00000650	1596158	G	A	0 5	0 2	0 7	0 3	0 6	0 3	0 3	0 3	0 6	0 6	0 2	0 1	0 5	0 2	0 5	0 1	0 1	0 3	0 7	0 10	0 5	0 3	0 4	0 9	0 4	0 11	0 13	0 1	0 6	0 3	0 0	0 1	0 4	0 1	0 0	0 0	0 4	0 4	0 2	0 4	0 2	0 7	0 2	4 5	0 14	0 6
tig00000650	1596172	C	T	0 5	0 2	0 6	0 2	0 4	0 3	0 3	0 3	0 3	0 4	0 2	0 1	0 3	0 2	0 3	0 0	0 1	0 1	0 3	0 11	0 5	0 0	0 2	0 4	0 3	0 9	0 6	0 1	0 2	0 0	2 0	0 0	0 2	0 0	0 0	0 0	0 0	0 5	1 2	0 3	0 2	0 6	1 1	0 6	3 10	0 6
tig00000650	1596183	A	T	0 0	0 1	0 0	0 0	0 0	0 0	0 0	0 1	0 0	0 0	0 0	0 0	0 0	0 0	0 0	0 0	0 0	0 0	0 1	0 12	0 1	0 0	1 0	0 1	0 0	1 1	0 0	0 1	0 0	0 0	0 0	0 0	0 0	0 0	0 0	0 0	1 0	2 0	2 0	1 0	0 0	6 0	0 0	2 0	8 0	2 0
tig00000650	1596214	A	G	0 0	0 0	0 0	0 0	0 0	0 0	0 0	0 0	0 0	0 0	0 0	0 0	0 0	0 0	0 0	0 0	0 0	0 0	0 0	0 9	1 0	0 2	0 0	0 0	0 0	0 0	0 0	0 0	0 0	0 0	2 0	1 0	2 2	0 0	0 0	0 0	3 0	1 0	1 0	3 0	0 4	2 6	0 0	0 4	3 13	0 3
tig00000650	1596244	G	A	0 0	0 0	0 1	0 0	0 0	0 0	0 0	0 0	0 0	0 0	0 0	0 0	0 0	0 0	0 0	0 0	0 0	0 0	0 0	0 5	0 1	0 2	0 0	0 0	0 0	0 0	0 0	0 0	0 0	0 0	0 2	2 0	0 2	0 0	0 0	0 0	0 2	1 0	0 0	0 3	0 4	0 7	0 0	0 4	0 15	0 3
tig00000650	1596250	TGACAAGTG	GGTAAGGTT	0 0	0 0	0 0	0 0	0 0	0 0	0 0	0 0	0 0	0 0	0 0	0 0	0 0	0 0	0 0	0 0	0 0	0 0	0 0	0 4	0 0	2 0	0 0	0 0	0 0	0 0	0 0	0 0	0 0	0 0	0 0	0 0	0 0	0 0	0 0	0 0	3 0	0 0	0 0	3 0	0 0	7 0	0 0	4 0	12 0	2 0
tig00000650	1596253	C	A	0 0	0 0	0 0	0 0	0 0	0 0	0 0	0 0	0 0	0 0	0 0	0 0	0 0	0 0	0 0	0 0	0 0	0 0	0 0	0 4	0 0	0 0	0 0	0 0	0 0	0 0	0 0	0 0	0 0	0 0	0 0	1 0	0 0	0 0	0 0	0 0	0 0	0 0	0 0	0 0	0 0	0 0	0 0	0 0	0 0	0 0
tig00000650	1596265	G	A	0 0	0 0	0 1	0 0	0 0	0 0	0 0	0 0	0 0	0 0	0 0	0 0	0 2	0 0	0 0	0 0	0 0	0 0	0 0	0 5	0 1	0 2	0 0	0 0	0 0	0 0	0 0	0 0	0 0	0 0	0 0	0 2	0 1	0 0	0 0	0 0	0 6	2 3	0 0	0 3	0 2	0 7	0 1	0 5	0 17	0 2
tig00000650	1596272	G	A	0 0	0 0	0 1	0 0	0 0	0 0	0 0	0 0	0 2	0 0	0 0	0 0	0 2	0 0	0 0	0 0	0 0	0 0	0 0	0 5	0 1	0 2	0 0	0 0	0 0	0 0	0 0	0 0	0 0	0 0	0 0	0 2	0 1	0 0	0 0	0 0	4 3	0 7	0 0	0 3	0 2	0 8	0 1	0 5	0 18	0 2
tig00000650	1596295	C	A	0 0	0 0	0 1	0 0	0 0	0 1	0 0	0 0	0 5	0 0	0 0	0 0	0 2	0 0	0 0	0 0	0 0	0 0	0 0	0 6	0 1	0 1	0 0	0 1	0 0	0 0	0 0	0 0	0 0	0 0	0 0	0 2	0 1	0 0	0 0	0 0	0 7	2 5	0 0	0 3	0 2	0 8	0 3	0 7	0 16	0 3
tig00000650	1596302	ATA	GTC	0 0	0 0	0 0	0 0	0 0	0 0	0 0	0 0	0 0	0 0	0 0	0 0	0 0	0 0	0 0	0 0	0 0	0 0	0 0	0 5	0 0	0 0	0 0	0 0	0 0	0 0	0 0	0 0	0 0	0 0	0 0	0 0	0 0	0 0	0 0	0 0	3 0	0 0	0 0	0 0	0 0	1 0	0 0	6 0	11 0	3 0
tig00000650	1596317	C	T	0 3	0 1	0 3	0 0	0 0	0 1	0 0	0 0	0 5	0 1	0 2	0 2	0 2	0 3	0 1	0 0	0 0	0 0	0 0	0 7	0 0	0 0	0 2	0 1	0 0	0 0	0 2	0 0	0 0	0 0	0 0	0 0	0 2	0 0	0 0	0 0	0 7	1 5	0 3	0 2	0 2	0 6	0 3	0 6	0 15	0 4
tig00000650	1596322	G	A	0 3	0 1	0 3	0 0	0 0	0 0	0 0	0 0	0 0	0 1	0 2	0 0	0 1	0 4	0 1	0 0	0 0	0 0	0 0	0 8	0 0	0 0	0 0	0 0	0 1	0 0	0 0	0 0	0 0	0 0	0 0	0 0	0 2	0 0	0 0	0 0	0 4	0 6	0 3	0 2	2 0	0 5	0 3	0 7	0 14	0 3
tig00000650	1596332	T	C	3 0	1 0	3 0	0 0	0 0	0 1	0 0	0 2	0 5	1 0	2 0	0 2	0 2	4 0	1 0	0 0	0 0	0 0	0 0	0 8	0 0	0 0	0 2	0 1	1 0	0 0	0 3	0 0	0 0	0 0	0 0	1 0	0 2	0 0	0 0	0 0	2 4	3 4	11 0	0 2	0 0	0 5	5 1	2 6	0 13	5 2
tig00000650	1596334	GTGT	ATGC	0 0	0 0	0 0	0 0	0 0	0 0	0 0	0 2	0 5	0 0	0 0	0 2	0 2	0 0	0 0	0 0	0 0	0 0	0 0	0 8	0 0	0 0	0 2	0 1	0 0	0 0	0 3	0 0	0 0	0 0	0 0	0 1	0 0	0 0	0 0	0 0	4 0	3 0	0 5	0 0	0 0	3 0	1 2	6 0	11 0	2 0
tig00000650	1596337	T	C	3 0	1 0	3 0	0 0	0 0	1 0	0 0	0 2	0 5	1 0	2 0	0 2	0 2	4 0	1 0	0 0	0 0	0 0	0 0	0 8	0 0	0 0	0 2	0 1	1 0	0 0	0 3	0 0	0 0	0 0	0 0	0 1	2 0	0 0	0 0	0 0	2 0	4 0	6 5	2 0	0 0	2 0	3 2	2 0	0 0	5 0
tig00000650	1596350	T	A	3 0	1 0	3 0	0 0	0 0	0 0	0 0	0 0	0 0	1 0	2 0	0 0	0 0	3 0	1 0	0 0	0 0	0 0	0 0	0 10	0 0	0 0	0 0	0 0	0 0	0 0	0 0	0 0	0 0	0 0	2 0	1 0	0 0	0 0	0 0	0 0	4 0	4 0	0 0	0 0	0 0	0 0	1 0	0 0	0 0	0 0
tig00000650	1596350	TA	AG	0 0	0 0	0 0	0 0	0 0	0 0	0 0	0 0	0 0	0 0	0 0	0 0	0 0	0 0	0 0	0 0	0 0	0 0	0 0	0 10	0 0	0 0	0 0	0 0	0 0	0 0	0 0	0 0	0 0	0 0	0 0	1 0	0 0	0 0	0 0	0 0	2 0	0 0	9 0	1 0	1 0	4 0	2 0	8 0	6 0	1 0
tig00000650	1596356	G	A	0 3	0 1	0 3	0 0	0 0	0 1	0 0	0 2	5 0	0 1	0 4	0 2	0 1	0 4	0 2	0 0	0 1	0 2	0 1	0 11	0 1	0 0	0 2	1 3	0 1	0 0	0 7	0 2	0 4	0 0	0 6	0 14	0 2	0 0	0 0	0 0	0 8	1 7	0 16	0 2	0 5	0 3	0 6	0 14	0 12	0 8
tig00000650	1596362	C	T	0 3	0 1	0 3	0 0	0 0	0 1	0 0	0 2	0 0	0 1	0 4	0 2	0 1	0 4	0 2	0 0	0 1	0 2	0 1	0 11	0 1	0 0	0 2	0 3	0 1	0 0	0 7	0 2	0 4	0 0	0 8	0 9	0 2	0 0	0 0	0 0	0 5	0 8	0 15	0 2	0 3	0 4	0 6	0 12	0 12	0 8
tig00000650	1596378	G	A	0 8	0 6	0 4	0 0	0 0	0 1	0 0	0 10	0 5	0 1	0 15	0 2	0 7	0 4	0 11	0 0	0 9	0 19	0 12	0 12	0 15	0 15	0 17	0 17	0 3	0 1	0 22	0 12	0 19	0 6	3 7	1 23	0 2	0 0	0 0	0 0	0 8	0 8	11 7	0 2	0 6	0 4	2 4	0 17	1 16	0 16
tig00000650	1596380	G	T	0 6	0 7	0 2	0 0	0 0	0 1	0 0	0 13	0 7	0 0	0 16	0 2	0 8	0 0	0 11	0 0	0 12	0 22	0 16	0 12	0 18	0 16	0 20	0 18	0 2	0 1	0 27	0 16	0 24	0 7	0 11	0 26	0 2	0 0	0 0	0 0	0 8	0 8	2 16	0 2	4 3	0 4	0 6	3 14	0 17	13 2
tig00000650	1596391	G	A	0 11	0 15	0 6	0 0	0 0	0 0	0 0	0 21	0 28	0 1	0 44	0 9	0 29	0 4	0 21	0 0	0 33	0 72	0 59	0 10	0 52	0 47	0 47	0 82	0 5	0 0	0 79	0 37	0 55	0 32	0 15	0 35	0 2	0 0	0 0	0 0	0 1	0 2	11 10	1 0	2 11	0 0	2 0	5 13	0 7	0 20
tig00000650	1596393	GTTGGT	TTGAC	0 11	0 15	0 6	0 0	0 0	0 0	0 0	0 21	0 28	0 1	0 44	0 9	0 29	0 4	0 21	0 0	0 33	0 72	0 59	0 10	0 52	0 47	0 47	0 82	0 5	0 0	0 79	0 37	0 55	0 32	0 15	0 35	0 2	0 0	0 0	0 0	4 1	4 2	0 10	0 0	0 11	0 0	0 0	0 13	0 7	0 20
tig00000650	1596397	GT	AC	0 11	0 15	0 6	0 0	0 0	0 0	0 0	0 21	0 28	0 1	0 44	0 9	0 29	0 4	0 21	0 0	0 33	0 72	0 59	0 10	0 52	0 47	0 47	0 82	0 5	0 0	0 79	0 37	0 55	0 32	0 15	0 35	0 2	0 0	0 0	0 0	0 1	0 2	0 10	0 0	0 11	0 0	1 0	0 13	0 7	0 20
tig00000650	1596403	AT	A	0 10	0 19	0 2	0 0	0 0	0 0	0 0	0 22	0 31	0 1	0 47	0 8	0 33	0 2	0 27	0 1	0 37	0 83	0 68	0 10	0 56	0 48	0 57	0 99	0 5	0 1	0 85	0 40	0 55	0 34	0 18	0 37	0 2	0 0	0 0	0 0	0 4	0 6	0 26	0 2	0 14	0 4	0 5	0 23	0 14	0 21
tig00000650	1596412	C	A	0 9	0 19	0 3	0 0	0 0	0 0	0 0	0 20	0 31	0 0	0 47	0 8	0 33	0 0	0 30	0 1	0 37	0 83	0 71	0 11	0 58	0 48	0 57	0 101	0 4	0 1	0 85	0 43	0 59	0 35	0 20	0 39	0 0	0 0	0 0	0 0	0 0	0 2	2 24	0 2	6 8	0 4	0 5	3 20	0 13	14 7
tig00000650	1596412	C	T	0 9	0 19	0 3	0 0	0 0	0 0	0 0	0 20	0 31	0 0	0 47	0 8	0 33	0 0	0 30	0 1	0 37	0 83	0 71	0 11	0 58	0 48	0 57	0 101	0 4	0 1	0 85	0 43	0 59	0 35	0 20	0 39	0 0	0 0	0 0	0 0	4 0	4 2	0 24	0 2	0 8	0 4	0 5	0 20	0 13	0 7
tig00000650	1596419	C	T	0 11	0 21	0 3	0 0	0 0	0 0	0 0	0 20	0 32	0 0	0 49	0 10	0 35	0 0	0 31	0 2	0 38	0 90	0 76	0 10	0 59	0 48	0 58	0 104	0 8	0 1	0 87	0 45	0 59	0 36	0 22	0 48	0 2	0 0	0 0	0 0	0 4	0 6	11 15	0 2	0 14	0 4	2 3	0 22	0 12	0 21
tig00000650	1596426	A	T	0 11	0 22	0 3	0 0	0 0	0 0	0 0	0 20	0 32	0 0	0 53	0 10	0 34	0 0	0 31	0 2	0 38	0 90	0 76	0 10	0 61	0 49	0 58	0 106	0 8	0 1	0 88	0 46	0 61	0 37	0 24	2 44	0 1	0 0	0 0	0 0	0 4	0 4	0 25	0 2	0 14	0 2	0 5	0 19	2 8	0 20
tig00000650	1596429	T	G	0 11	5 16	0 3	0 0	0 0	0 0	0 0	10 10	28 4	0 0	45 8	8 2	33 4	0 0	20 11	0 2	32 6	90 1	71 5	0 11	53 8	47 2	54 4	107 2	0 8	0 1	84 1	42 5	60 1	35 2	0 23	0 47	0 1	0 0	0 0	0 0	0 4	0 4	21 5	2 1	13 2	0 2	3 2	14 5	0 8	16 4
tig00000650	1596430	G	A	0 11	0 22	0 3	0 0	0 0	0 0	0 0	0 20	0 31	0 0	0 53	0 10	0 35	0 0	0 31	0 2	0 38	0 90	0 76	0 10	0 61	0 49	0 58	0 108	0 8	0 1	0 87	0 47	0 60	0 37	0 24	1 46	0 1	0 0	0 0	0 0	0 4	0 4	0 25	0 3	0 15	0 2	0 4	0 19	0 8	0 20
tig00000650	1596433	G	A	0 11	0 22	0 3	0 0	0 0	0 0	0 0	0 20	0 32	0 0	0 55	0 11	0 36	0 0	0 31	0 2	0 38	0 91	0 76	0 10	0 61	0 49	0 58	1 108	0 8	0 1	0 88	0 47	0 61	0 37	4 19	0 46	0 1	0 0	0 0	0 0	0 4	0 2	0 23	0 3	0 13	0 2	0 5	0 19	0 8	0 16
tig00000650	1596452	CACCA	TACCT	0 11	6 17	0 3	0 0	0 0	0 0	0 0	10 10	28 4	0 0	40 10	9 2	34 2	0 0	20 11	0 2	31 6	89 1	70 6	0 10	52 8	47 2	50 4	104 3	0 8	0 1	83 1	40 4	56 1	34 3	0 13	0 31	0 1	0 0	0 0	0 0	0 4	0 4	0 16	0 3	0 5	0 1	0 3	0 10	0 8	0 5
tig00000650	1596456	A	T	0 11	0 17	0 3	0 0	0 0	0 0	0 0	0 10	0 4	0 0	3 10	0 2	0 2	0 0	0 11	0 2	0 6	0 1	0 6	0 10	0 8	0 2	0 4	0 3	0 8	0 1	0 1	0 4	0 1	0 3	0 13	0 31	0 1	0 0	0 0	0 0	0 4	0 4	7 16	0 3	10 5	0 1	0 3	9 10	0 8	15 5
tig00000650	1596462	G	A	0 11	1 22	0 3	0 0	0 0	0 0	0 0	0 20	0 32	0 0	0 53	0 11	0 35	0 0	0 31	0 2	0 37	0 90	0 76	0 9	0 59	0 49	0 55	0 106	0 8	0 1	0 84	0 45	0 57	0 38	0 13	0 29	0 1	0 0	0 0	0 0	0 4	0 4	0 21	0 4	0 17	0 2	0 3	0 19	0 9	0 19
tig00000650	1596468	C	T	0 10	0 22	0 3	0 0	0 0	0 0	0 0	0 20	0 32	0 0	0 53	0 11	0 35	0 0	0 31	0 2	0 38	0 90	0 76	0 8	0 59	0 49	0 55	0 107	0 8	0 1	0 84	0 45	0 57	0 38	0 13	0 24	0 2	0 0	0 0	0 0	0 4	0 4	0 22	0 4	0 16	0 2	0 3	0 18	0 9	0 19
tig00000650	1596473	C	T	0 5	0 8	0 2	0 0	0 0	0 0	0 0	0 4	0 3	0 0	0 2	0 1	0 2	0 0	0 0	0 2	0 3	0 1	0 0	0 8	0 3	0 1	0 2	0 3	0 6	0 0	0 1	0 1	0 1	0 2	0 7	5 3	0 2	0 0	0 0	0 0	0 2	0 2	0 9	0 4	0 14	0 1	0 0	0 13	0 9	0 11
tig00000650	1596474	A	T	0 5	0 8	0 2	0 0	0 0	0 0	0 0	1 4	0 3	0 0	1 2	2 1	1 2	0 0	3 0	0 2	0 3	1 1	3 0	0 8	3 3	1 1	1 2	1 3	0 6	0 0	5 1	1 1	2 1	0 2	0 7	0 3	0 2	0 0	0 0	0 0	0 2	0 2	0 9	0 4	0 14	0 1	0 0	0 13	0 9	0 11
tig00000650	1596481	C	G	0 5	0 12	0 2	0 0	0 0	0 0	0 0	0 5	0 19	0 0	0 25	0 8	0 19	0 0	0 19	0 2	0 20	0 38	0 34	0 8	0 26	0 16	0 19	0 61	0 6	0 0	0 42	0 18	0 22	0 16	0 7	0 12	0 2	0 0	0 0	0 0	0 2	0 2	6 3	0 4	0 15	0 1	0 0	0 13	0 9	0 11
tig00000650	1596490	A	G	0 0	0 1	0 0	0 0	0 0	0 0	0 0	0 0	0 0	0 0	0 0	0 0	0 1	0 0	0 3	0 0	0 1	0 0	0 0	0 8	0 0	0 0	0 0	0 0	0 0	0 0	0 1	0 0	0 0	0 1	3 0	6 0	0 0	0 0	0 0	0 0	0 0	0 0	4 0	1 1	5 2	0 0	0 0	5 0	2 0	3 0
tig00000650	1596514	C	CT	0 0	0 0	0 0	0 0	0 0	0 0	0 0	0 0	0 0	0 0	0 0	0 0	0 0	0 0	0 0	0 0	0 0	0 0	0 0	4 0	0 0	0 0	0 0	0 0	0 0	0 0	0 0	0 0	0 0	0 0	0 0	0 0	0 0	0 0	0 0	0 0	0 0	0 0	0 0	1 0	2 0	0 0	0 0	0 0	0 0	3 0
tig00000650	1596524	G	A	0 0	0 0	0 0	0 0	0 0	0 0	0 0	0 0	0 0	0 0	0 0	0 0	0 0	0 0	0 0	0 0	0 0	0 0	0 0	4 0	0 0	0 0	0 0	0 0	0 0	0 0	0 0	0 0	0 0	0 0	0 0	0 0	1 0	0 0	0 0	0 0	0 0	0 0	0 0	1 0	0 0	0 0	0 0	0 0	0 0	2 0
tig00000650	1596542	GGAG	AGAGC	0 0	0 0	0 0	0 0	0 0	0 0	0 0	0 0	0 0	0 0	0 0	0 0	0 0	0 0	0 0	0 0	0 0	0 0	0 0	0 0	0 0	0 0	0 0	0 0	0 0	0 0	0 0	0 0	0 0	0 0	0 0	0 0	2 0	0 0	0 0	0 0	0 0	0 0	0 0	0 0	0 0	0 0	0 0	0 0	0 0	0 0
tig00000650	1596579	G	A	0 0	0 0	0 0	0 0	0 0	0 2	0 1	0 0	0 0	0 0	0 0	0 0	0 0	0 4	0 0	0 6	0 5	0 0	0 0	0 3	0 1	0 1	0 0	0 1	0 1	0 0	0 1	0 0	0 0	0 0	0 5	2 0	2 0	0 0	0 0	0 0	0 2	0 0	0 2	0 0	0 0	0 2	0 0	0 0	1 1	0 5
tig00000650	1596580	GCAGT	ACAGA	0 0	0 0	0 0	0 0	0 0	0 0	0 1	0 0	0 0	0 0	0 0	0 0	0 0	4 0	0 0	5 0	4 1	0 0	0 0	0 3	0 0	0 1	0 0	0 0	0 0	0 0	0 1	0 0	0 0	0 0	0 0	0 2	0 2	0 0	0 0	0 0	0 2	0 0	0 1	0 0	0 0	0 2	0 0	0 0	0 2	0 5
tig00000650	1596583	G	A	0 0	0 0	0 0	0 0	0 0	0 0	0 1	0 0	0 0	0 0	0 0	0 0	0 0	0 0	0 0	0 0	0 1	0 0	0 0	0 3	0 0	0 1	0 0	0 0	0 0	0 0	0 1	0 0	0 0	0 0	0 0	0 2	0 2	0 0	0 0	0 0	0 2	0 0	0 1	0 0	0 0	0 2	0 0	0 0	0 2	0 5
tig00000650	1596597	T	C	0 0	0 0	0 0	0 0	0 0	1 0	1 0	0 0	0 0	0 0	0 0	0 0	0 0	0 4	0 0	1 4	0 4	0 0	0 0	0 2	0 0	1 0	0 0	0 1	1 0	0 0	1 0	0 0	0 0	0 0	0 5	2 0	2 0	0 0	0 0	0 0	2 0	0 0	1 1	0 0	0 0	1 0	0 0	0 0	2 0	3 1
tig00000650	1596614	T	G	0 0	0 0	0 0	0 0	0 0	0 0	0 0	0 0	0 0	0 0	0 0	0 0	0 0	0 0	0 0	0 0	0 0	0 0	0 0	0 5	0 0	0 0	0 0	0 0	0 0	0 0	0 0	0 0	0 0	0 0	0 0	0 0	2 0	0 0	0 0	0 0	0 0	0 0	0 0	0 0	0 0	0 0	0 0	0 0	0 0	0 0
tig00000650	1596641	AGT	A	0 0	0 0	0 0	0 0	0 0	0 0	0 0	0 0	0 0	0 0	0 0	0 0	0 0	0 0	0 0	0 0	0 0	0 0	0 0	0 6	0 0	0 0	0 0	0 0	0 0	0 0	0 0	0 0	0 0	0 0	0 0	0 0	2 0	0 0	0 0	0 0	0 0	0 0	0 0	0 0	0 0	1 0	0 0	0 0	0 0	0 0
tig00000650	1596652	G	T	0 0	0 0	0 0	0 0	0 0	0 0	0 0	0 0	0 0	0 0	0 0	0 0	0 0	0 0	0 0	0 0	0 0	0 0	0 0	0 7	0 0	0 0	0 0	0 0	0 0	0 0	0 0	0 0	0 0	0 0	0 1	0 0	0 5	0 0	0 0	0 0	0 0	0 0	0 0	0 0	2 1	0 1	0 0	0 0	0 0	3 0
tig00000650	1596665	A	G	0 0	0 0	0 0	0 0	0 0	0 0	0 0	0 0	0 0	0 0	0 0	0 0	0 0	0 0	0 0	0 0	0 0	0 0	0 0	0 8	0 0	0 0	0 0	0 0	0 0	0 0	0 0	0 0	0 0	0 0	0 1	0 0	1 4	0 0	0 0	0 0	0 0	0 0	0 0	0 0	3 0	1 0	0 0	0 0	0 0	4 0
tig00000650	1596683	G	A	0 0	0 0	0 0	0 0	0 0	0 0	0 0	0 0	0 0	0 0	0 0	0 0	0 0	0 0	0 0	0 0	0 0	0 0	0 0	0 8	0 0	0 0	0 0	0 0	0 0	0 0	0 0	0 0	0 0	0 0	0 0	0 0	0 4	0 0	0 0	0 0	0 0	0 0	0 0	0 0	3 2	0 1	0 0	0 0	0 0	3 1
tig00000650	1596690	G	A	0 0	0 0	0 0	0 0	0 0	0 0	0 0	0 0	0 0	0 0	0 0	0 0	0 0	0 0	0 0	0 0	0 0	0 0	0 0	0 6	0 0	0 0	0 0	0 0	0 0	0 0	0 0	0 0	0 0	0 0	0 1	0 0	4 1	0 0	0 0	0 0	0 1	0 1	0 4	0 1	0 0	0 0	0 0	0 0	0 0	0 0
tig00000650	1596690	GTGT	ATGA	0 0	0 0	0 0	0 0	0 0	0 0	0 0	0 0	0 0	0 0	0 0	0 0	0 0	0 0	0 0	0 0	0 0	0 0	0 0	0 6	0 0	0 0	0 0	0 0	0 0	0 0	0 0	0 0	0 0	0 0	0 1	0 0	0 1	0 0	0 0	0 0	0 1	0 1	0 4	0 1	2 0	1 0	0 0	0 0	0 0	1 0
tig00000650	1596693	T	TGA	0 0	0 0	0 0	0 0	0 0	0 0	0 0	0 0	0 0	0 0	0 0	0 0	0 0	0 0	0 0	0 0	0 0	0 0	0 0	0 6	0 0	0 0	0 0	0 0	0 0	0 0	0 0	0 0	0 0	0 0	0 1	0 0	0 1	0 0	0 0	0 0	0 1	0 1	0 4	0 1	3 0	0 0	0 0	0 0	0 0	4 0
tig00000650	1596702	G	A	1 0	0 0	0 0	0 0	0 4	0 0	0 0	1 0	0 0	0 0	0 0	0 0	0 1	0 0	0 0	0 0	0 0	0 1	0 0	0 7	0 0	0 0	0 0	0 0	0 1	0 3	0 0	0 0	0 1	0 2	0 1	0 0	4 1	0 0	0 0	0 0	1 0	1 0	4 1	1 0	0 6	0 1	0 0	0 0	0 2	0 6
tig00000650	1596707	A	T	0 1	0 1	0 0	0 0	0 6	0 0	0 0	0 1	0 0	0 0	0 0	0 0	0 3	0 0	0 0	0 0	0 0	1 1	0 0	0 8	0 0	0 1	0 0	0 0	0 0	0 4	0 0	0 0	0 1	0 2	0 0	0 0	4 0	0 0	0 0	0 0	0 1	0 1	0 5	0 1	2 4	1 0	0 0	0 0	0 2	1 5
tig00000650	1596708	G	A	0 1	0 1	0 0	0 0	0 6	0 0	0 0	0 1	0 0	0 0	0 0	0 0	0 3	0 0	0 0	0 0	0 0	0 2	0 0	0 8	0 0	0 1	0 0	0 0	0 1	0 5	0 1	0 0	0 1	0 2	0 0	0 0	0 4	0 0	0 0	0 0	0 1	0 1	0 4	0 1	4 2	0 1	0 0	0 0	0 2	4 2
tig00000650	1596722	C	T	1 0	2 0	2 0	0 0	14 0	0 0	1 0	1 0	3 0	0 0	0 0	0 0	6 0	0 0	0 0	1 0	0 0	4 0	0 0	1 7	1 0	3 0	0 0	0 0	1 0	9 0	3 0	0 0	2 0	2 0	0 0	0 0	4 0	0 0	0 0	0 0	1 0	1 0	5 0	1 0	5 0	1 0	0 0	0 0	2 0	6 0
tig00000650	1596734	T	A	0 1	0 4	0 2	0 0	0 14	0 0	0 0	0 1	0 0	0 0	0 0	0 0	0 6	0 0	0 0	0 0	0 0	0 1	0 0	0 8	0 1	0 2	0 0	0 0	0 1	0 10	0 0	0 0	0 1	0 2	0 0	0 0	0 0	0 0	0 0	0 0	1 0	1 0	4 0	0 0	4 0	0 0	0 0	0 0	0 0	4 0
tig00000650	1596735	T	C	0 1	0 4	0 2	0 0	0 14	0 0	0 0	0 1	3 0	0 0	0 0	0 0	1 6	0 0	0 0	2 0	0 0	1 1	0 0	0 8	0 1	0 2	0 0	0 0	0 1	0 10	1 0	0 0	1 1	0 2	4 0	1 0	4 0	0 0	0 0	0 0	0 0	0 0	0 0	0 0	2 0	1 0	0 0	0 0	0 0	1 0
tig00000650	1596766	C	T	0 7	0 9	0 2	0 0	3 15	0 3	4 11	0 4	5 2	0 2	0 3	0 1	0 7	0 0	0 0	4 2	0 1	1 5	0 4	0 8	0 6	0 3	0 3	0 2	0 1	0 11	4 1	0 2	2 1	0 8	9 1	0 12	0 3	0 0	0 2	0 0	0 1	0 2	0 5	0 1	0 8	0 2	0 0	0 2	5 2	0 7
tig00000650	1596774	A	G	0 7	0 9	0 4	0 0	0 18	0 3	0 14	0 4	0 7	0 2	0 4	0 1	0 7	0 0	0 0	0 6	0 1	0 6	0 4	0 6	0 6	0 3	0 3	0 2	0 1	0 11	0 5	0 2	0 2	0 8	0 12	0 15	0 3	0 0	1 1	0 0	0 1	0 2	0 5	0 1	0 8	0 2	0 0	0 2	0 8	0 6
tig00000650	1596776	TGACT	GGAAC	0 6	0 9	0 2	0 0	0 18	0 2	0 15	0 3	0 7	0 2	0 4	0 1	0 5	0 0	0 0	0 6	0 1	0 5	0 4	0 5	0 6	0 1	0 3	0 2	0 1	0 11	0 5	0 2	0 2	0 6	0 7	0 15	0 1	0 0	0 1	0 0	1 0	1 0	5 0	1 0	4 3	0 2	0 0	0 0	2 6	4 2
tig00000650	1596785	C	T	6 1	0 9	0 4	0 0	0 18	0 3	0 15	0 4	0 7	0 2	0 4	1 0	0 7	0 0	0 0	0 6	0 1	0 6	2 4	0 4	4 4	0 3	1 2	0 2	0 1	0 11	0 5	2 0	0 3	6 2	2 10	3 14	0 1	0 0	0 2	0 0	0 0	0 2	0 5	0 1	3 4	0 2	0 0	0 2	0 8	0 5
tig00000650	1596790	G	A	0 7	3 5	2 2	0 0	14 4	0 3	0 15	0 4	0 7	0 2	0 4	0 1	4 3	0 0	0 0	0 6	0 1	0 6	0 6	0 5	2 6	2 1	0 3	0 2	0 1	9 1	0 5	0 2	0 3	0 8	0 13	3 15	0 1	0 0	0 2	0 0	0 1	0 2	0 5	0 1	0 8	0 1	0 0	0 2	0 8	0 6
tig00000650	1596814	T	C	3 0	0 0	0 2	0 0	0 0	0 0	1 0	0 0	1 0	0 0	0 0	1 0	0 0	0 0	0 0	0 0	0 0	0 0	0 2	0 6	3 2	0 0	1 0	0 0	0 0	0 0	0 0	1 0	0 0	5 0	1 0	7 0	1 0	0 0	0 0	0 0	0 0	0 0	2 0	0 0	4 0	1 0	0 0	2 0	0 6	2 0
tig00000650	1596825	A	G	0 6	0 0	0 4	0 1	0 0	0 0	0 0	0 0	0 0	0 2	0 0	0 1	0 0	0 0	0 0	0 0	0 1	0 0	0 1	0 6	0 3	0 0	1 1	0 0	0 2	0 0	0 0	0 1	0 0	0 6	2 0	6 0	0 0	0 0	0 1	0 0	0 0	1 0	0 0	0 0	1 2	1 0	0 0	2 0	6 0	1 0
tig00000650	1596838	CTTAGCCTT	TTTAGACTC	0 0	0 0	0 2	0 0	0 0	0 0	0 0	0 0	0 0	0 0	0 0	0 0	0 0	0 0	0 0	0 0	0 0	0 0	0 2	0 4	0 2	0 0	0 0	0 0	0 0	0 0	0 0	0 0	0 0	0 0	0 0	0 2	0 0	0 0	0 0	0 0	0 0	0 0	0 0	0 0	0 0	0 0	0 0	0 0	6 0	0 0
tig00000650	1596846	T	C	4 0	0 0	0 2	0 0	0 0	0 0	0 0	0 0	0 0	0 0	0 0	0 0	0 0	0 0	0 0	0 0	0 0	0 0	1 2	0 4	0 2	0 0	1 0	0 0	0 0	0 0	0 0	1 0	0 0	1 0	2 0	2 2	0 0	0 0	0 0	0 0	0 0	0 0	0 0	0 0	1 0	0 0	0 0	0 0	0 0	0 0
tig00000650	1597350	T	G	0 0	1 0	0 0	0 0	0 0	0 0	1 0	0 0	0 0	0 0	0 0	0 0	0 0	0 0	0 0	0 0	0 0	0 0	1 0	0 6	0 0	0 0	0 0	0 0	0 0	0 0	0 0	0 0	1 0	0 0	5 0	9 0	0 0	0 0	0 0	0 0	0 0	0 0	0 0	0 0	0 0	0 0	0 0	0 0	0 0	0 0
tig00000650	1597436	C	CT	0 0	0 0	0 0	0 0	0 0	0 0	0 0	0 0	1 0	0 0	0 0	0 0	0 0	0 0	0 0	0 0	0 0	0 0	0 0	2 0	0 0	0 0	0 0	0 0	0 0	0 0	0 0	0 0	0 0	0 0	0 0	1 0	0 0	0 0	0 0	0 0	0 0	0 0	0 0	0 0	0 0	0 0	0 0	0 0	0 0	0 0
tig00000650	1597801	ACAG	TCTC	0 0	0 0	0 0	0 0	0 0	0 0	0 0	0 0	0 0	0 0	0 0	0 0	0 0	0 0	0 0	0 0	0 0	0 0	0 0	0 5	0 0	0 0	0 0	0 0	0 0	0 0	0 0	0 0	0 0	0 0	0 0	0 0	0 0	0 0	0 0	0 0	0 0	0 0	0 0	0 0	0 0	0 0	0 0	0 0	0 0	0 0
tig00000650	1597803	A	T	0 0	0 0	0 0	0 0	0 0	0 0	0 0	0 0	0 0	0 0	0 0	0 0	0 0	0 0	0 0	0 0	0 0	0 0	0 0	0 5	0 0	0 0	0 0	0 0	0 0	0 0	0 0	0 0	0 0	0 0	9 0	10 0	0 0	0 0	0 0	0 0	0 0	0 0	0 0	0 0	0 0	0 0	0 0	0 0	0 0	0 0
tig00000650	1597808	T	A	0 0	0 0	0 0	0 0	0 0	0 0	0 0	0 0	0 0	0 0	0 0	0 0	0 0	0 0	0 0	0 0	0 0	0 0	0 0	0 5	0 0	0 0	0 0	0 0	0 0	0 0	0 0	0 0	0 0	0 0	9 0	10 0	0 0	0 0	0 0	0 0	0 0	0 0	0 0	0 0	0 0	0 0	0 0	0 0	0 0	0 0
tig00000650	1597816	G	A	0 0	0 0	0 0	0 0	0 0	0 0	0 0	0 0	0 0	0 0	0 0	0 0	0 0	0 0	0 0	0 0	0 0	0 0	0 0	0 4	0 0	0 0	0 0	0 0	0 0	0 0	0 0	0 0	0 0	0 0	0 9	0 10	0 0	0 0	0 0	0 0	0 0	0 0	0 0	0 0	0 0	0 0	0 0	0 0	0 0	0 0
tig00000650	1597830	A	T	0 0	0 0	0 0	0 0	0 0	0 0	0 0	0 0	0 0	0 0	0 0	0 0	0 0	0 0	0 0	0 0	0 0	0 0	0 0	0 4	0 0	0 0	0 0	0 0	0 0	0 0	0 0	0 0	0 0	0 0	0 9	0 10	0 0	0 0	0 0	0 0	0 0	0 0	0 0	0 0	0 0	0 0	0 0	0 0	0 0	0 0
tig00000650	1597835	G	A	0 0	0 0	0 0	0 0	0 0	0 0	0 0	0 0	0 0	0 0	0 0	0 0	0 0	0 0	0 0	0 0	0 0	0 0	0 0	0 4	0 0	0 0	0 0	0 0	0 0	0 0	0 0	0 0	0 0	0 0	9 0	10 0	0 0	0 0	0 0	0 0	0 0	0 0	0 0	0 0	0 0	0 0	0 0	0 0	0 0	0 0
tig00000650	1597839	TCGAA	GCGAG	0 0	0 0	0 0	0 0	0 0	0 0	0 0	0 0	0 0	0 0	0 0	0 0	0 0	0 0	0 0	0 0	0 0	0 0	0 0	0 3	0 0	0 0	0 0	0 0	0 0	0 0	0 0	0 0	0 0	0 0	0 7	0 8	0 0	0 0	0 0	0 0	0 0	0 0	0 0	0 0	0 0	0 0	0 0	0 0	0 0	0 0
tig00000650	1597855	AGT	GGC	0 0	0 0	0 0	0 0	0 0	0 0	0 0	0 0	0 0	0 0	0 0	0 0	0 0	0 0	0 0	0 0	0 0	0 0	0 0	0 2	0 0	0 0	0 0	0 0	0 0	0 0	0 0	0 0	0 0	0 0	0 5	0 6	0 0	0 0	0 0	0 0	0 0	0 0	0 0	0 0	0 0	0 0	0 0	0 0	0 0	0 0
tig00000650	1597874	C	CT	0 0	0 0	0 0	0 0	0 0	0 0	0 0	0 0	0 0	0 0	0 0	0 0	0 0	0 0	0 0	0 0	0 0	0 0	0 0	1 0	0 0	0 0	0 0	0 0	0 0	0 0	0 0	0 0	0 0	0 0	1 0	1 0	0 0	0 0	0 0	0 0	0 0	0 0	0 0	0 0	0 0	0 0	0 0	0 0	0 0	0 0
tig00000650	1598002	A	G	0 0	0 0	0 0	1 0	0 0	1 0	0 0	1 0	0 0	1 0	1 0	0 0	0 0	0 0	1 0	0 0	0 0	0 0	0 0	0 9	0 0	0 0	0 0	2 0	0 0	0 0	0 0	0 0	0 0	0 0	0 0	0 0	0 0	0 0	0 0	0 0	0 0	0 0	0 0	0 0	0 0	0 0	0 0	0 0	0 0	0 0
tig00000650	1598046	GTAAG	AGAA	0 0	0 0	0 0	0 0	0 0	0 0	0 0	0 0	0 0	0 0	0 0	0 0	0 0	0 0	0 0	0 0	0 0	0 0	0 0	6 0	0 0	0 0	0 0	0 0	0 0	0 0	0 0	0 0	0 0	0 0	0 0	0 0	0 0	0 0	0 0	0 0	0 0	0 0	0 0	0 0	0 0	0 0	0 0	0 0	0 0	0 0
tig00000650	1598117	GGCTAC	AGCTCT	0 0	0 0	0 0	0 0	0 0	0 0	0 0	0 0	0 0	0 0	0 0	0 0	0 0	0 0	0 0	0 0	0 0	0 0	0 0	1 0	0 0	0 0	0 0	0 0	0 0	0 0	0 0	0 0	0 0	0 0	1 0	0 0	0 0	0 0	0 0	0 0	0 0	0 0	0 0	0 0	0 0	0 0	0 0	0 0	0 0	0 0
tig00000650	1598128	GT	AA	0 0	0 0	0 0	0 0	0 0	0 0	0 0	0 0	0 0	0 0	0 0	0 0	0 0	0 0	0 0	0 0	0 0	0 0	0 0	0 0	0 0	0 0	0 0	0 0	0 0	0 0	0 0	0 0	0 0	0 0	2 0	0 0	0 0	0 0	0 0	0 0	0 0	0 0	0 0	0 0	0 0	0 0	0 0	0 0	0 0	0 0
tig00000650	1598136	A	C	0 0	0 0	0 0	0 0	0 0	0 0	0 0	0 0	0 0	0 0	0 0	0 0	0 0	0 0	0 0	0 0	0 0	0 0	0 0	0 4	0 0	0 0	0 0	0 0	0 0	0 0	0 0	0 0	0 0	0 0	0 4	0 3	0 0	0 0	0 0	0 0	0 0	0 0	0 0	0 0	0 0	0 0	0 0	0 0	0 0	0 0
tig00000650	1598173	G	A	0 0	0 0	0 0	0 0	0 0	0 0	0 0	0 0	0 0	0 0	0 0	0 0	0 0	0 0	0 0	0 0	0 0	0 0	0 0	0 8	0 0	0 0	0 0	0 0	0 0	0 0	0 0	0 0	0 0	0 0	16 0	16 0	0 0	0 0	0 0	0 0	0 0	0 0	0 0	0 0	0 0	0 0	0 0	0 0	0 0	0 0
tig00000650	1598176	C	T	0 0	0 0	0 0	0 0	0 0	0 0	0 0	0 0	0 0	0 0	0 0	0 0	0 0	0 0	0 0	0 0	0 0	0 0	0 0	0 8	0 0	0 0	0 0	0 0	0 0	0 0	0 0	0 0	0 0	0 0	0 16	0 15	0 0	0 0	0 0	0 0	0 0	0 0	0 0	0 0	0 0	0 0	0 0	0 0	0 0	0 0
tig00000650	1598180	G	A	0 0	0 0	0 0	0 0	0 0	0 0	0 0	0 0	0 0	0 0	0 0	0 0	0 0	0 0	0 0	0 0	0 0	0 0	0 0	0 8	0 0	0 0	0 0	0 0	0 0	0 0	0 0	0 0	0 0	0 0	0 15	0 16	0 0	0 0	0 0	0 0	0 0	0 0	0 0	0 0	0 0	0 0	0 0	0 0	0 0	0 0
tig00000650	1598186	CA	AG	0 0	0 0	0 0	0 0	0 0	0 0	0 0	0 0	0 0	0 0	0 0	0 0	0 0	0 0	0 0	0 0	0 0	0 0	0 0	0 8	0 0	0 0	0 0	0 0	0 0	0 0	0 0	0 0	0 0	0 0	0 0	0 0	0 0	0 0	0 0	0 0	0 0	0 0	0 0	0 0	0 0	0 0	0 0	0 0	0 0	0 0
tig00000650	1598187	A	C	0 0	0 0	0 0	0 0	0 0	0 0	0 0	0 0	0 0	0 0	0 0	0 0	0 0	0 0	0 0	0 0	0 0	0 0	0 0	0 8	0 0	0 0	0 0	0 0	0 0	0 0	0 0	0 0	0 0	0 0	16 0	16 0	0 0	0 0	0 0	0 0	0 0	0 0	0 0	0 0	0 0	0 0	0 0	0 0	0 0	0 0
tig00000650	1598207	AGGGTTAGATCG	A	0 0	0 0	0 0	0 0	0 0	0 0	0 0	0 0	0 0	0 0	0 0	0 0	0 0	0 0	0 0	0 0	0 0	0 0	0 0	0 8	0 0	0 0	0 0	0 0	0 0	0 0	0 0	0 0	0 0	0 0	2 0	10 0	0 0	0 0	0 0	0 0	0 0	0 0	0 0	0 0	0 0	0 0	0 0	0 0	0 0	0 0
tig00000650	1598209	GGTTAGATCG	TTTAGA	0 0	0 0	0 0	0 0	0 0	0 0	0 0	0 0	0 0	0 0	0 0	0 0	0 0	0 0	0 0	0 0	0 0	0 0	0 0	0 8	0 0	0 0	0 0	0 0	0 0	0 0	0 0	0 0	0 0	0 0	11 0	0 0	0 0	0 0	0 0	0 0	0 0	0 0	0 0	0 0	0 0	0 0	0 0	0 0	0 0	0 0
tig00000650	1598229	A	G	0 0	0 0	0 0	0 0	0 0	0 0	0 0	0 0	0 0	0 0	0 0	0 0	0 0	0 0	0 0	0 0	0 0	0 0	0 0	0 11	0 0	0 0	0 0	0 0	0 0	0 0	0 0	0 0	0 0	0 0	13 0	12 0	0 0	0 0	0 0	0 0	0 0	0 0	0 0	0 0	0 0	0 0	0 0	0 0	0 0	0 0
tig00000650	1598242	A	T	0 0	0 0	0 0	0 0	0 0	0 0	0 0	0 0	0 0	0 0	0 0	0 0	0 0	0 0	0 0	0 0	0 0	0 0	0 0	0 13	0 0	0 0	0 0	0 0	0 0	0 0	0 0	0 0	0 0	0 0	11 0	12 0	1 0	0 0	0 0	0 0	0 0	0 0	0 0	0 0	0 0	0 0	0 0	0 0	0 0	0 0
tig00000650	1598250	T	C	0 0	0 0	0 0	0 0	0 0	0 0	0 0	0 0	0 0	0 0	0 0	0 0	0 0	0 0	0 0	0 0	0 0	0 0	0 0	0 13	0 0	0 0	0 0	0 0	0 0	0 0	0 0	0 0	0 0	0 0	9 0	8 0	1 0	0 0	0 0	0 0	0 0	0 0	0 0	0 0	0 0	0 0	0 0	0 0	0 0	0 0
tig00000650	1598250	T	G	0 0	0 0	0 0	0 0	0 0	0 0	0 0	0 0	0 0	0 0	0 0	0 0	0 0	0 0	0 0	0 0	0 0	0 0	0 0	0 13	0 0	0 0	0 0	0 0	0 0	0 0	0 0	0 0	0 0	0 0	0 0	0 0	0 0	0 0	0 0	0 0	0 0	0 0	0 0	0 0	0 0	0 0	0 0	0 0	0 0	0 0
tig00000650	1598255	G	A	0 0	0 0	0 0	0 0	0 0	0 0	0 0	0 0	0 0	0 0	0 0	0 0	0 0	0 0	0 0	0 0	0 0	0 0	0 0	0 13	0 0	0 0	0 0	0 0	0 0	0 0	0 0	0 0	0 0	0 0	8 0	7 0	1 0	0 0	0 0	0 0	0 0	0 0	0 0	0 0	0 0	0 0	0 0	0 0	0 0	0 0
tig00000650	1598260	T	TA	0 0	0 0	0 0	0 0	0 0	0 0	0 0	0 0	0 0	0 0	0 0	0 0	0 0	0 0	0 0	0 0	0 0	0 0	0 0	0 10	0 0	0 0	0 0	0 0	0 0	0 0	0 0	0 0	0 0	0 0	1 0	1 0	0 0	0 0	0 0	0 0	0 0	0 0	0 0	0 0	0 0	0 0	0 0	0 0	0 0	0 0
tig00000650	1598261	TAA	AT	0 0	0 0	0 0	0 0	0 0	0 0	0 0	0 0	0 0	0 0	0 0	0 0	0 0	0 0	0 0	0 0	0 0	0 0	0 0	0 10	0 0	0 0	0 0	0 0	0 0	0 0	0 0	0 0	0 0	0 0	3 0	1 0	1 0	0 0	0 0	0 0	0 0	0 0	0 0	0 0	0 0	0 0	0 0	0 0	0 0	0 0
tig00000650	1598273	G	A	0 0	0 0	0 0	0 0	0 0	0 0	0 0	0 0	0 0	0 0	0 0	0 0	0 0	0 0	0 0	0 0	0 0	0 0	0 0	0 10	0 0	0 0	0 0	0 0	0 0	0 0	0 0	0 0	0 0	0 0	4 0	4 0	1 0	0 0	0 0	0 0	0 0	0 0	0 0	0 0	0 0	0 0	0 0	0 0	0 0	0 0
tig00000650	1598282	ACAAT	GCATA	0 0	0 0	0 0	0 0	0 0	0 0	0 0	0 0	0 0	0 0	0 0	0 0	0 0	0 0	0 0	0 0	0 0	0 0	0 0	0 9	0 0	0 0	0 0	0 0	0 0	0 0	0 0	0 0	0 0	0 0	2 0	4 0	1 0	0 0	0 0	0 0	0 0	0 0	0 0	0 0	0 0	0 0	0 0	0 0	0 0	0 0
tig00000650	1598315	C	G	0 0	0 0	0 0	0 0	0 0	0 0	0 0	0 0	0 0	0 0	0 0	0 0	0 0	0 0	0 0	0 0	0 0	0 0	0 0	0 9	0 0	0 0	0 0	0 0	0 0	0 0	0 0	0 0	0 0	0 0	3 0	4 0	2 0	0 0	0 0	0 0	0 0	0 0	0 0	0 0	0 0	0 0	0 0	0 0	0 0	0 0
tig00000650	1598330	CC	TT	0 0	0 0	0 0	0 0	0 0	0 0	0 0	0 0	0 0	0 0	0 0	0 0	0 0	0 0	0 0	0 0	0 0	0 0	0 0	0 9	0 0	0 0	0 0	0 0	0 0	0 0	0 0	0 0	0 0	0 0	2 0	2 0	2 0	0 0	0 0	0 0	0 0	0 0	0 0	0 0	0 0	0 0	0 0	0 0	0 0	0 0
tig00000650	1598400	AC	GT	9 0	4 0	0 0	4 0	0 0	7 0	0 0	4 0	0 0	11 0	2 0	0 0	0 0	0 0	2 0	0 0	0 0	0 0	6 0	0 6	0 0	0 0	0 0	0 0	2 0	4 0	0 0	0 0	0 0	0 0	0 0	0 0	0 0	0 0	0 0	0 0	0 0	0 0	0 0	0 0	0 0	0 0	0 0	0 0	0 0	0 0
tig00000650	1598410	A	G	0 10	0 5	0 3	0 9	0 4	0 9	0 0	0 5	0 0	0 13	0 2	0 0	0 0	0 1	0 2	0 0	0 0	0 0	0 7	0 6	0 0	0 0	0 0	0 0	0 3	0 7	0 0	0 0	0 0	0 0	0 0	0 0	2 2	0 0	0 0	0 0	0 1	0 3	0 0	5 0	0 0	0 0	1 0	0 0	0 0	0 1
tig00000650	1598412	T	G	9 0	4 0	0 0	4 0	0 0	7 0	0 0	0 0	0 0	11 0	0 0	0 0	0 0	0 0	0 0	0 0	0 0	0 0	3 0	0 6	0 0	0 0	0 0	0 0	2 0	4 0	0 0	0 0	0 0	0 0	0 0	0 0	1 0	0 0	0 0	0 0	0 1	0 3	0 0	0 5	0 0	0 0	0 1	0 0	0 0	0 1
tig00000650	1598421	A	G	10 0	5 0	3 0	9 0	4 0	9 0	0 0	5 0	0 0	13 0	2 0	0 0	0 0	1 0	2 0	0 0	0 0	0 0	3 4	0 6	0 0	0 0	0 0	0 0	3 0	7 0	0 0	0 0	0 0	0 0	0 0	0 0	0 2	0 0	0 0	0 0	1 0	3 0	0 0	5 0	0 0	0 0	1 0	0 0	0 0	1 0
tig00000650	1598423	G	A	0 10	0 5	0 3	0 9	0 4	0 9	0 0	0 5	0 0	0 13	0 2	0 0	0 0	0 1	0 2	0 0	0 0	0 0	0 7	0 6	0 0	0 0	0 0	0 0	0 3	0 7	0 0	0 0	0 0	0 0	0 0	0 0	2 0	0 0	0 0	0 0	0 8	0 7	0 0	0 6	0 3	0 0	0 2	0 0	0 3	0 2
tig00000650	1598432	GTGA	ATGG	0 10	0 5	0 3	0 9	0 4	0 9	0 0	0 5	0 0	0 13	0 2	0 0	0 0	0 1	0 2	0 0	0 0	0 0	0 3	0 5	0 0	0 0	0 0	0 0	0 3	0 7	0 0	0 0	0 0	0 0	0 0	0 0	0 2	0 0	0 0	0 0	8 0	6 1	0 0	0 5	0 3	0 0	1 0	0 0	0 1	0 1
tig00000650	1598435	A	G	0 10	0 5	0 3	0 9	0 4	0 9	0 0	0 5	0 0	0 13	0 2	0 0	0 0	0 1	0 2	0 0	0 0	0 0	4 3	0 5	0 0	0 0	0 0	0 0	0 3	0 7	0 0	0 0	0 0	0 0	0 0	0 0	0 2	0 0	0 0	0 0	0 0	0 1	0 0	0 5	0 3	0 0	0 0	0 0	0 1	2 1
tig00000650	1598453	C	T	0 0	0 0	0 0	0 0	0 0	1 0	0 0	3 0	0 0	2 0	0 0	0 0	2 0	2 0	0 0	0 0	0 0	0 0	4 0	0 7	2 0	0 0	0 0	0 0	0 0	0 0	1 0	2 0	0 0	0 0	0 0	0 10	0 0	0 0	0 0	0 0	7 0	6 0	0 0	0 0	0 0	0 0	1 0	0 0	0 0	0 0
tig00000650	1598460	G	A	0 0	0 0	0 0	0 0	0 0	0 5	0 0	0 4	0 2	0 2	0 1	0 0	0 3	0 4	0 0	0 0	0 0	0 1	0 9	0 8	0 2	0 0	0 1	0 0	0 0	0 0	0 3	0 3	0 2	0 2	0 1	0 12	0 3	0 0	0 0	0 0	8 14	6 3	0 7	0 8	0 15	0 19	1 4	0 2	0 22	0 18
tig00000650	1598467	G	A	0 0	0 0	0 0	0 0	0 0	0 7	0 0	0 4	0 2	0 2	0 1	0 0	0 3	0 5	0 0	0 0	0 0	0 1	0 10	0 10	0 3	0 0	0 1	0 0	0 0	0 0	0 3	0 4	0 2	0 5	0 1	0 11	0 3	0 0	0 0	0 0	8 14	6 3	0 7	0 9	0 15	0 21	1 4	0 2	0 30	0 19
tig00000650	1598471	G	A	0 0	0 0	0 0	0 0	0 0	0 7	0 0	0 4	0 2	0 4	0 1	0 0	0 3	0 5	0 0	0 0	0 0	0 1	0 12	0 10	0 5	0 0	0 1	0 0	0 0	0 0	0 4	0 4	0 3	0 5	0 1	9 2	0 3	0 0	0 0	0 0	0 22	0 9	0 7	0 9	0 15	0 20	0 5	0 2	8 24	0 19
tig00000650	1598478	C	G	0 0	0 0	0 0	0 0	0 0	0 6	0 0	0 4	0 2	0 4	0 1	0 0	0 4	0 5	0 0	0 0	0 0	0 1	0 12	0 11	0 5	0 0	0 1	0 0	0 0	0 0	0 4	0 4	0 3	0 5	0 1	0 12	0 3	0 0	0 0	0 0	14 8	3 6	7 0	8 1	12 3	21 0	2 3	2 0	21 11	16 3
tig00000650	1598485	T	C	0 0	0 0	0 0	0 0	0 0	0 0	0 0	0 0	0 0	0 0	0 0	0 0	0 0	0 0	0 0	0 0	0 0	0 0	0 0	0 9	0 0	0 0	0 0	0 0	0 0	0 0	0 0	0 0	0 0	0 0	0 0	0 0	0 0	0 0	0 0	0 0	9 0	3 0	7 0	6 0	10 0	20 0	2 0	2 0	16 8	13 0
tig00000650	1598493	G	A	0 0	0 0	0 0	0 0	0 0	0 11	0 0	0 9	0 3	0 8	0 7	0 1	0 6	0 10	0 3	0 0	0 0	0 4	0 24	0 10	0 7	0 1	0 5	0 3	0 0	0 0	0 4	0 8	0 6	0 8	0 2	0 4	0 3	0 0	0 0	0 0	0 14	1 2	1 6	0 8	0 15	0 21	0 4	2 0	8 24	0 18
tig00000650	1598494	C	T	0 0	0 0	0 0	0 0	0 0	0 11	0 0	0 9	0 3	0 8	0 7	0 1	0 6	0 10	0 3	0 0	0 0	0 4	0 26	0 10	0 7	0 1	0 5	0 3	0 0	0 0	0 4	0 8	0 6	0 8	0 2	0 5	0 3	0 0	0 0	0 0	0 13	0 3	0 7	0 8	0 15	0 21	0 4	0 2	0 32	0 19
tig00000650	1598498	C	T	0 0	0 0	0 0	0 0	0 0	0 11	0 0	0 9	0 1	0 9	0 6	0 1	0 6	0 10	0 3	0 0	0 0	0 3	0 25	0 10	0 7	0 1	0 4	0 3	0 0	0 0	0 3	0 8	0 6	0 6	2 0	2 0	3 0	0 0	0 0	0 0	0 14	0 3	0 7	0 9	0 15	0 22	0 4	0 2	0 32	0 13
tig00000650	1598509	G	A	0 0	0 0	0 0	0 0	0 0	0 12	0 0	0 11	1 0	0 10	0 6	0 1	0 6	0 12	0 3	0 0	0 0	0 3	0 28	0 9	0 7	0 1	0 4	0 3	0 0	0 0	0 3	0 8	0 6	0 6	0 4	0 3	0 3	0 0	0 0	0 0	0 0	1 0	0 0	1 0	0 3	0 0	0 0	1 0	0 8	1 3
tig00000650	1598510	T	C	0 0	0 0	0 0	0 0	0 0	11 0	0 0	9 0	0 0	8 0	0 0	0 0	4 0	9 0	0 0	0 0	0 0	0 0	24 0	0 9	6 0	0 0	0 0	0 0	0 0	0 0	3 0	6 0	4 0	5 0	2 2	2 0	3 0	0 0	0 0	0 0	0 0	0 1	0 0	0 1	0 0	0 0	0 0	0 1	7 0	0 1
tig00000650	1598510	TAC	CAT	0 0	0 0	0 0	0 0	0 0	0 0	0 0	0 0	1 0	0 0	6 0	1 0	2 0	0 0	3 0	0 0	0 0	3 0	0 0	0 9	0 0	1 0	4 0	3 0	0 0	0 0	0 0	2 0	0 0	1 0	0 2	0 0	0 0	0 0	0 0	0 0	0 0	0 1	0 0	0 1	0 0	0 0	0 0	0 1	0 0	0 1
tig00000650	1598517	T	C	0 0	0 0	0 0	0 0	0 0	0 12	0 0	0 11	0 1	0 10	0 6	0 1	0 6	0 11	0 3	0 0	0 0	0 3	0 28	0 9	0 7	0 1	0 4	0 3	0 0	0 0	0 3	0 8	0 6	0 6	2 2	3 0	2 0	0 0	0 0	0 0	0 0	0 0	0 0	0 0	0 0	0 0	0 0	0 0	0 0	0 0
tig00000650	1598524	G	A	0 0	0 0	0 0	0 0	0 0	0 12	0 0	0 11	0 1	0 10	0 6	0 1	0 6	0 11	0 3	0 0	0 0	0 3	0 28	0 11	0 7	0 1	0 4	0 3	0 0	0 0	0 3	0 8	0 6	0 6	2 2	3 0	3 0	0 0	0 0	0 0	0 0	0 0	0 0	0 0	0 0	0 0	0 0	0 0	0 0	0 0
tig00000650	1598529	G	A	0 0	0 0	0 0	0 0	0 0	0 12	0 0	0 11	0 0	0 10	0 0	0 0	0 4	0 11	0 0	0 0	0 0	0 0	0 28	0 11	0 6	0 0	0 0	0 0	0 0	0 0	0 3	0 6	0 6	0 5	0 2	0 3	3 0	0 0	0 0	0 0	0 0	0 0	0 0	0 0	0 0	0 0	0 0	0 0	0 0	0 0
tig00000650	1598529	GCG	ACA	0 0	0 0	0 0	0 0	0 0	0 12	0 0	0 11	0 0	0 10	6 0	1 0	2 4	0 11	3 0	0 0	0 0	3 0	0 28	0 11	0 6	1 0	3 0	3 0	0 0	0 0	0 3	2 6	0 6	1 5	0 2	0 3	0 0	0 0	0 0	0 0	0 0	0 0	0 0	0 0	0 0	0 0	0 0	0 0	0 0	0 0
tig00000650	1598543	C	T	0 0	0 0	0 0	0 0	0 0	0 10	0 0	0 10	1 0	0 10	0 6	0 1	0 5	0 10	0 3	0 0	0 0	0 3	0 24	0 10	0 5	0 1	0 4	0 3	0 0	0 0	0 3	0 6	0 4	0 6	3 2	2 0	0 3	0 0	0 0	0 0	0 0	0 0	0 0	0 0	0 0	0 0	0 0	0 0	0 0	0 0
tig00000650	1598557	ATTA	GTTG	0 0	0 0	0 0	0 0	0 0	4 0	0 0	6 0	1 0	8 0	5 0	0 0	3 0	7 0	3 0	0 0	0 0	1 0	17 0	0 10	3 0	0 0	2 0	3 0	0 0	0 0	0 0	3 0	4 0	5 0	0 0	1 0	1 0	0 0	0 0	0 0	0 0	0 0	0 0	0 0	0 0	0 0	0 0	0 0	0 0	0 0
tig00000650	1598560	A	G	0 0	0 0	0 0	0 0	0 0	0 0	0 0	0 0	0 0	0 0	0 0	0 0	0 0	0 0	0 0	0 0	0 0	0 0	0 0	0 10	0 0	0 0	0 0	0 0	0 0	0 0	0 0	0 0	0 0	0 0	0 0	0 0	0 0	0 0	0 0	0 0	0 0	0 0	0 0	0 0	0 0	0 0	0 0	0 0	0 0	0 0
tig00000650	1598563	G	T	0 0	0 0	0 0	0 0	0 0	0 4	0 0	0 7	0 1	0 8	0 5	0 0	0 3	0 7	0 3	0 0	0 0	0 1	0 17	0 10	0 3	0 0	0 2	0 3	0 0	0 0	0 0	0 3	0 4	0 5	0 0	1 0	1 0	0 0	0 0	0 0	0 0	0 0	0 0	0 0	0 0	0 0	0 0	0 0	0 0	0 0
tig00000650	1598568	T	C	0 0	0 0	0 0	0 0	0 0	3 0	0 0	7 0	1 0	8 0	2 0	0 0	2 0	7 0	1 0	0 0	0 0	0 0	16 0	0 11	2 0	0 0	1 0	1 0	0 0	0 0	0 0	3 0	3 0	3 0	0 0	0 1	0 1	0 0	0 0	0 0	0 0	0 0	0 0	0 0	0 0	0 0	0 0	0 0	0 0	0 0
tig00000650	1598593	TCT	GCG	0 0	0 0	0 0	0 0	0 0	0 0	0 0	0 0	0 0	0 0	0 0	0 0	0 0	0 0	0 0	0 0	0 0	0 0	0 0	0 10	0 0	0 0	0 0	0 0	0 0	0 0	0 0	0 0	0 0	0 0	0 0	0 0	0 0	0 0	0 0	0 0	1 0	2 0	0 0	0 0	0 0	0 0	3 0	0 0	0 0	0 0
tig00000650	1598609	A	G	0 0	0 0	0 0	0 0	0 0	0 0	0 0	0 0	0 0	0 0	0 0	0 0	0 0	0 0	0 0	0 0	0 0	0 0	0 0	0 11	0 0	0 0	0 0	0 0	0 0	0 0	0 0	0 0	0 0	0 0	0 0	0 0	0 1	0 0	0 0	0 0	1 0	2 0	0 0	0 0	0 0	0 0	3 0	0 0	0 0	0 0
tig00000650	1598614	CCCTAG	TCCTGGA	0 0	0 0	0 0	0 0	0 0	0 0	0 0	0 0	0 0	0 0	0 0	0 0	0 0	0 0	0 0	0 0	0 0	0 0	0 0	0 10	0 0	0 0	0 0	0 0	0 0	0 0	0 0	0 0	0 0	0 0	0 0	0 0	0 0	0 0	0 0	0 0	1 0	2 0	0 0	0 0	0 0	0 0	3 0	0 0	0 0	0 0
tig00000650	1598635	CA	TG	0 0	0 0	0 0	0 0	0 0	0 0	0 0	0 0	0 0	0 0	0 0	0 0	0 0	0 0	0 0	0 0	0 0	0 0	0 0	0 9	0 0	0 0	0 0	0 0	0 0	0 0	0 0	0 0	0 0	0 0	3 0	5 0	2 0	0 0	0 0	0 0	0 0	0 0	0 0	0 0	0 0	0 0	0 0	0 0	0 0	0 0
tig00000650	1598636	A	G	0 0	0 0	0 0	0 0	0 0	0 0	0 0	0 0	0 0	0 0	0 0	0 0	0 0	0 0	0 0	0 0	0 0	0 0	0 0	0 9	0 0	0 0	0 0	0 0	0 0	0 0	0 0	0 0	0 0	0 0	0 0	0 0	0 0	0 0	0 0	0 0	1 0	1 0	2 0	3 0	2 0	1 0	3 0	3 0	0 0	2 0
tig00000650	1598643	C	T	0 0	0 0	0 0	0 0	0 0	0 0	0 0	0 0	0 0	0 0	0 0	0 1	0 0	0 0	0 0	0 1	0 0	0 0	0 0	0 10	0 0	0 0	0 0	0 0	0 0	0 0	0 0	0 0	0 0	0 0	0 4	0 5	0 2	0 0	0 0	0 0	1 4	1 1	0 2	3 0	0 4	1 0	3 0	0 3	0 0	2 0
tig00000650	1598645	G	A	0 0	0 0	0 0	0 0	0 0	0 0	0 0	0 0	0 0	0 0	0 0	0 1	0 0	0 0	0 0	0 1	0 0	0 0	0 0	0 10	0 0	0 0	0 0	0 0	0 0	0 0	0 0	0 0	0 0	0 0	4 0	5 0	2 0	0 0	0 0	0 0	0 5	0 2	0 2	0 3	0 4	0 1	3 0	0 3	0 0	0 2
tig00000650	1598650	CTTAGGGCTGGA	TCTAGGGCTGGG	0 0	0 0	0 0	0 0	0 0	0 0	0 0	0 0	0 0	0 0	0 0	0 0	0 0	0 0	0 0	0 0	0 0	0 0	0 0	0 9	0 0	0 0	0 0	0 0	0 0	0 0	0 0	0 0	0 0	0 0	0 0	0 0	0 0	0 0	0 0	0 0	1 0	1 0	0 0	3 0	0 0	1 0	0 0	0 0	0 0	2 0
tig00000650	1598650	CTTAGGGCTGGA	TCTGGGGCTGGG	0 0	0 0	0 0	0 0	0 0	0 0	0 0	0 0	0 0	0 0	0 0	0 0	0 0	0 0	0 0	0 0	0 0	0 0	0 0	0 9	0 0	0 0	0 0	0 0	0 0	0 0	0 0	0 0	0 0	0 0	0 0	0 0	0 0	0 0	0 0	0 0	3 0	1 0	0 0	0 0	0 0	0 0	0 0	0 0	0 0	0 0
tig00000650	1598653	AGGGCTGGA	GGGGTTGGG	0 0	0 0	0 0	0 0	0 0	0 0	0 0	0 0	0 0	0 0	0 0	0 0	0 0	0 0	0 0	0 0	0 0	0 0	0 0	0 9	0 0	0 0	0 0	0 0	0 0	0 0	0 0	0 0	0 0	0 0	3 0	5 0	2 0	0 0	0 0	0 0	0 0	0 0	0 0	0 0	0 0	0 0	0 0	0 0	0 0	0 0
tig00000650	1598672	G	T	0 0	0 0	0 0	0 0	0 0	0 0	0 1	0 0	0 0	0 0	0 0	0 1	0 1	0 0	0 0	0 1	0 0	0 0	0 1	0 9	0 0	0 0	0 0	0 1	0 0	0 0	0 1	0 0	0 0	0 0	0 5	0 6	0 2	0 0	0 0	0 0	0 6	0 5	0 2	0 3	0 5	0 1	0 3	0 3	0 0	0 2
tig00000650	1598676	C	T	0 0	0 0	0 0	0 0	0 0	0 0	0 1	0 0	0 0	0 0	0 0	0 1	0 2	0 0	0 0	0 1	0 0	0 1	0 1	0 9	0 0	0 0	0 0	0 1	0 0	0 0	0 0	0 0	0 0	0 0	0 6	0 6	0 3	0 0	0 0	0 0	1 6	1 4	0 2	3 0	0 5	1 0	0 3	0 3	0 0	2 0
tig00000650	1598677	C	G	0 0	0 0	0 0	0 0	0 0	0 0	0 1	0 0	0 0	0 0	0 0	0 0	0 2	0 0	0 0	0 0	0 0	0 1	0 1	0 9	0 0	0 0	0 0	0 1	0 0	0 0	0 1	0 0	0 0	0 0	0 6	0 6	0 2	0 0	0 0	0 0	1 6	3 2	0 2	0 3	0 5	0 1	2 0	0 3	0 0	0 2
tig00000650	1598679	G	A	0 0	0 0	0 0	0 0	0 0	0 0	1 0	0 0	0 0	0 0	0 0	0 1	0 2	0 0	0 0	0 1	0 0	0 1	1 0	0 8	0 0	0 0	0 0	0 1	0 0	0 0	0 1	0 0	0 0	0 0	6 0	5 0	2 1	0 0	0 0	0 0	0 7	0 5	0 2	0 3	0 4	0 1	0 3	0 3	0 0	0 2
tig00000650	1598687	GTT	ATC	0 0	0 0	0 0	0 0	0 0	0 0	0 1	0 0	0 0	0 0	0 0	0 0	0 1	0 0	0 0	0 0	0 0	0 1	0 1	0 7	0 0	0 0	0 0	0 1	0 0	0 0	0 1	0 0	0 0	0 0	0 0	0 0	0 0	0 0	0 0	0 0	0 0	0 0	0 0	0 0	0 0	0 0	0 0	0 0	0 0	0 0
tig00000650	1598689	T	C	0 0	0 0	0 0	0 0	0 0	0 0	0 1	0 0	0 0	0 0	0 0	1 0	1 1	0 0	0 0	1 0	0 0	0 1	0 1	0 7	0 0	0 0	0 0	0 1	0 0	0 0	0 1	0 0	0 0	0 0	4 0	5 0	2 0	0 0	0 0	0 0	0 0	0 0	0 0	0 0	3 0	0 0	0 0	0 0	0 0	0 0
tig00000650	1598706	CAGGC	AAGGA	0 0	0 0	0 0	0 0	0 0	0 0	0 0	0 0	0 0	0 0	0 0	0 0	0 1	0 0	0 0	0 0	0 0	0 1	0 0	0 6	0 0	0 0	0 0	0 1	0 0	0 0	0 0	0 0	0 0	0 0	0 5	0 4	0 2	0 0	0 0	0 0	0 0	0 0	0 0	0 0	0 0	0 0	0 0	0 0	0 0	0 0
tig00000650	1598716	A	G	0 0	0 0	0 0	0 0	0 0	0 0	0 0	0 0	0 0	0 0	0 0	0 0	0 0	0 0	0 0	0 0	0 0	0 0	0 0	0 7	0 0	0 0	0 1	0 0	0 0	0 0	0 0	0 0	0 0	0 0	0 6	0 4	0 2	0 0	0 0	0 0	1 0	0 0	0 0	0 0	0 3	0 0	0 0	0 0	0 0	0 0
tig00000650	1598721	GTGGTG	ATGGCA	0 0	0 0	0 0	0 0	0 0	0 0	0 0	0 0	0 0	0 0	0 0	0 0	0 0	0 0	0 0	0 0	0 0	0 0	0 0	0 7	0 0	0 0	0 0	0 0	0 0	0 0	0 0	0 0	0 0	0 0	0 0	0 0	0 0	0 0	0 0	0 0	0 1	0 0	0 0	0 0	0 3	0 0	0 0	0 0	0 0	0 0
tig00000650	1598725	T	C	0 0	0 0	0 0	0 0	0 0	0 0	0 0	0 0	0 0	0 0	0 0	0 0	0 0	0 0	0 0	0 0	0 0	0 0	0 0	0 7	0 0	0 0	0 0	0 0	0 0	0 0	0 0	0 0	0 0	0 0	4 0	3 0	2 0	0 0	0 0	0 0	0 1	0 0	0 0	0 0	0 3	0 0	0 0	0 0	0 0	0 0
tig00000650	1598784	G	C	0 0	0 0	0 0	0 0	0 0	0 0	0 0	0 0	0 0	0 0	0 0	0 0	0 0	0 0	0 0	0 0	0 0	0 0	0 0	0 7	0 0	0 0	0 0	0 0	0 0	0 0	0 0	0 0	0 0	0 0	0 0	0 0	0 0	0 0	0 0	0 0	0 0	2 0	0 0	0 1	0 0	0 0	0 0	0 1	0 0	0 0
tig00000650	1598798	G	C	0 0	0 0	0 0	0 0	0 0	0 0	0 0	0 0	0 0	0 0	0 0	0 0	0 0	0 0	0 0	0 0	0 0	0 0	0 0	0 8	0 0	0 0	0 0	0 0	0 0	0 0	0 0	0 0	0 0	0 0	0 0	0 0	0 0	0 0	0 0	0 0	0 0	2 0	0 0	0 0	0 0	0 0	0 0	0 0	0 0	0 0
tig00000650	1598826	T	C	0 0	0 0	0 0	0 0	0 0	0 0	0 0	0 0	0 0	0 0	0 0	0 0	0 0	0 0	0 0	0 0	0 0	0 0	0 0	0 5	0 0	0 0	0 0	0 0	0 0	0 0	0 0	0 0	0 0	0 0	0 0	0 0	0 0	0 0	0 0	0 0	0 0	2 0	0 0	0 0	0 0	0 0	0 0	0 0	0 0	0 0
tig00000650	1598891	T	A	0 0	0 0	0 0	0 0	0 0	0 0	0 0	0 0	0 0	0 0	0 0	0 0	0 0	0 0	0 0	0 0	0 0	0 0	0 0	0 6	0 0	0 0	0 0	0 0	0 0	0 0	0 0	0 0	0 0	0 0	0 0	0 0	0 0	0 0	0 0	0 0	0 0	2 0	0 0	0 0	0 0	0 0	0 0	1 1	0 0	0 4
tig00000650	1598956	G	T	0 0	0 0	0 0	0 0	0 1	0 0	0 0	0 0	0 0	0 0	0 0	0 0	0 0	0 0	0 0	0 0	0 0	0 0	0 0	0 4	0 0	0 0	0 0	0 1	0 0	0 0	0 0	0 0	0 0	0 0	0 0	0 0	0 0	0 0	0 0	0 0	0 1	2 0	0 0	0 0	0 0	0 0	0 3	0 0	0 0	0 0
tig00000650	1598969	T	C	0 0	0 0	0 0	0 0	0 0	0 0	0 0	0 0	0 0	0 0	0 0	0 0	0 0	0 0	0 0	0 0	0 0	0 0	0 0	0 4	0 0	0 0	0 0	1 0	0 0	0 0	0 0	0 0	0 0	0 0	0 0	0 0	0 0	0 0	0 0	0 0	0 1	0 2	0 0	0 0	0 0	0 0	0 3	0 1	0 0	0 0
tig00000650	1598979	A	G	0 0	0 0	0 0	0 0	0 0	0 0	0 0	0 0	0 0	0 0	0 0	0 0	0 0	0 0	0 0	0 0	0 0	0 0	0 0	0 5	0 0	0 0	0 0	1 0	0 0	0 0	0 0	0 0	0 0	0 0	0 0	0 0	0 0	0 0	0 0	0 0	0 1	0 2	0 0	0 0	0 0	0 0	0 3	0 1	0 0	0 0
tig00000650	1598995	A	G	0 0	0 0	0 0	0 0	0 0	0 0	0 0	0 0	0 0	0 0	0 0	0 0	0 0	0 0	0 0	0 0	0 0	0 0	0 0	0 5	0 0	0 0	0 0	0 1	0 0	0 0	0 0	0 0	0 0	0 0	0 0	0 0	0 0	0 0	0 0	0 0	0 0	2 0	0 0	0 0	0 0	0 0	0 0	0 1	0 0	0 0
tig00000650	1599008	T	C	0 0	0 0	0 0	0 0	0 0	0 0	0 0	0 0	0 0	0 0	0 0	0 0	0 0	0 0	0 0	0 0	0 0	0 0	0 0	0 9	0 0	0 0	0 0	0 1	0 0	0 0	0 0	0 0	0 0	0 0	0 0	0 0	0 0	0 0	0 0	0 0	0 1	2 0	0 0	0 0	0 0	0 0	0 3	0 3	0 0	0 0
tig00000650	1599015	A	T	0 0	0 0	0 0	0 0	0 0	0 0	0 0	0 0	0 0	0 0	0 0	0 0	0 0	0 0	0 0	0 0	0 0	0 0	0 0	0 9	0 0	0 0	0 0	0 0	0 0	0 0	0 0	0 0	0 0	0 0	0 0	0 0	0 0	0 0	0 0	0 0	0 0	0 0	0 0	0 0	0 0	0 0	0 0	0 0	0 0	0 0
tig00000650	1599015	ATT	TAA	0 0	0 0	0 0	0 0	0 0	0 0	0 0	0 0	0 0	0 0	0 0	0 0	0 0	0 0	0 0	0 0	0 0	0 0	0 0	0 9	0 0	0 0	0 0	0 0	0 0	0 0	0 0	0 0	0 0	0 0	0 0	0 0	0 0	0 0	0 0	0 0	0 0	2 0	0 0	0 0	0 0	0 0	0 0	0 0	0 0	0 0
tig00000650	1599042	C	A	0 0	0 0	0 0	0 0	0 0	0 0	0 0	0 0	0 0	0 0	0 0	0 0	0 0	0 0	0 0	0 0	0 0	0 0	0 0	0 11	0 0	0 0	0 0	0 0	0 0	0 0	0 0	0 0	0 0	0 0	0 0	0 0	0 0	0 0	0 0	0 0	0 1	2 0	2 0	0 1	1 0	0 0	0 4	0 2	0 0	1 2
tig00000650	1599065	T	G	0 0	0 0	0 0	0 0	0 0	0 0	0 0	0 0	0 0	0 0	0 0	0 0	0 0	0 0	0 0	0 0	0 0	0 0	0 0	0 11	0 0	0 0	0 0	0 0	0 0	0 0	0 0	0 0	0 0	0 0	0 0	0 0	0 0	0 0	0 0	0 0	0 1	0 0	5 0	0 1	1 0	0 0	0 3	0 2	0 0	1 2
tig00000650	1599076	TTTTTTG	CTTTTTA	0 0	0 0	0 0	0 0	0 0	0 0	0 0	0 0	0 0	0 0	0 0	0 0	0 0	0 0	0 0	0 0	0 0	0 0	0 0	0 11	0 0	0 0	0 0	0 0	0 0	0 0	0 0	0 0	0 0	0 0	0 0	0 0	0 0	0 0	0 0	0 0	0 0	0 0	4 0	0 0	1 0	0 0	0 0	0 0	0 0	1 0
tig00000650	1599082	G	A	0 0	0 0	0 0	0 0	0 0	0 0	0 0	0 0	0 0	0 0	0 0	0 0	0 0	0 0	0 0	0 0	0 0	0 0	0 0	0 11	0 0	0 0	0 0	0 0	0 0	0 0	0 0	0 0	0 0	0 0	0 0	0 0	0 0	0 0	0 0	0 0	0 0	0 0	0 0	0 0	0 0	0 0	0 0	0 0	0 0	0 0
tig00000650	1599088	A	G	0 0	0 0	0 0	0 0	0 0	0 0	0 0	0 0	0 0	0 0	0 0	0 0	0 0	0 0	0 0	0 0	0 0	0 0	0 0	0 11	0 0	0 0	0 0	0 0	0 0	0 0	0 0	0 0	0 0	0 0	0 0	0 0	0 0	0 0	0 0	0 0	0 0	0 0	3 1	0 0	1 0	0 1	0 2	0 3	0 2	1 1
tig00000650	1599091	A	G	0 0	0 0	0 0	0 0	0 0	0 0	0 0	0 0	0 0	0 0	0 0	0 0	0 0	0 0	0 0	0 0	0 0	0 0	0 0	0 11	0 0	0 0	0 0	0 0	0 0	0 0	0 0	0 0	0 0	0 0	0 0	0 0	0 0	0 0	0 0	0 0	0 1	0 0	0 6	0 0	0 1	0 1	0 2	0 3	0 2	0 4
tig00000650	1599112	A	G	0 0	0 0	0 0	0 0	0 0	0 0	0 0	0 0	0 0	0 0	0 0	0 0	0 0	0 0	0 0	0 0	0 0	0 0	0 0	0 10	0 0	0 0	0 0	0 0	0 0	0 0	0 0	0 0	0 0	0 0	0 0	0 0	0 0	0 0	0 0	0 0	0 1	0 3	7 0	0 0	2 0	1 1	0 2	0 3	1 2	1 3
tig00000650	1599131	T	C	0 0	0 0	0 0	0 0	0 0	0 0	0 0	0 0	0 0	0 0	0 0	0 0	0 0	0 0	0 0	0 0	0 0	0 0	0 0	0 8	0 0	0 0	0 0	0 0	0 0	0 0	0 0	0 0	0 0	0 0	0 0	0 0	0 0	0 0	0 0	0 0	0 2	0 4	0 8	0 1	0 2	0 4	0 3	1 7	0 3	0 5
tig00000650	1599148	A	G	0 0	0 0	0 0	0 0	0 0	0 0	0 0	0 0	0 0	0 0	0 0	0 0	0 0	0 0	0 0	0 0	0 0	0 0	0 0	0 6	0 0	0 0	0 0	0 0	0 0	0 0	0 0	0 0	0 0	0 0	0 0	0 0	0 0	0 0	0 0	0 0	2 2	0 7	0 11	0 1	0 2	1 3	0 2	0 6	0 4	0 4
tig00000650	1599157	C	T	0 0	0 0	0 0	0 0	0 0	0 0	0 0	0 0	0 0	0 0	0 0	0 0	0 0	0 0	0 0	0 0	0 0	0 0	0 0	0 6	0 0	0 0	0 0	0 0	0 0	0 0	0 0	0 0	0 0	0 0	0 0	0 0	0 0	0 0	0 0	0 0	0 2	0 7	0 11	0 1	0 2	0 3	0 2	0 6	0 4	0 4
tig00000650	1599168	T	C	0 0	0 0	0 0	0 0	0 0	0 0	0 0	0 0	0 0	0 0	0 0	0 0	0 0	0 0	0 0	0 0	0 0	0 0	0 0	0 6	0 0	0 0	0 0	0 0	0 0	0 0	0 0	0 0	0 0	0 0	0 0	0 0	0 0	0 0	0 0	0 0	0 7	2 6	0 15	0 3	0 2	0 4	0 4	1 5	3 5	1 4
tig00000650	1599175	A	C	0 0	0 0	0 0	0 0	0 0	0 0	0 0	0 0	0 0	0 0	0 0	0 0	0 0	0 0	0 0	0 0	0 0	0 0	0 0	0 7	0 0	0 0	0 0	0 0	0 0	0 0	0 0	0 0	0 0	0 0	0 0	0 0	0 0	0 0	0 0	0 0	0 8	4 4	0 15	0 3	0 2	0 6	0 3	0 6	0 8	0 2
tig00000650	1599193	ATAAA	GTAAC	0 0	0 0	0 0	0 0	0 0	0 0	0 0	0 0	0 0	0 0	0 0	0 0	0 0	0 0	0 0	0 0	0 0	0 0	0 0	0 4	0 0	0 0	0 0	0 0	0 0	0 0	0 0	0 0	0 0	0 0	0 0	0 0	0 0	0 0	0 0	0 0	3 5	0 8	0 12	0 6	0 2	0 6	2 1	0 11	0 6	0 3
tig00000650	1599199	A	T	0 0	0 0	0 0	0 0	0 0	0 0	0 0	0 0	0 0	0 1	0 0	0 0	0 0	0 0	0 0	0 0	0 0	0 0	0 0	0 5	0 0	0 0	0 0	0 0	0 0	0 0	0 0	0 0	0 0	0 0	0 0	0 0	0 0	0 0	0 0	0 0	1 7	5 0	4 0	3 0	0 0	1 1	0 4	3 1	0 1	0 0
tig00000650	1599199	ATTTTA	TTTTTG	0 0	0 0	0 0	0 0	0 0	0 0	0 0	0 0	0 0	0 1	0 0	0 0	0 0	0 0	0 0	0 0	0 0	0 0	0 0	0 5	0 0	0 0	0 0	0 0	0 0	0 0	0 0	0 0	0 0	0 0	0 0	0 0	0 0	0 0	0 0	0 0	0 7	0 0	7 0	4 0	2 0	4 1	0 4	2 1	1 1	2 0
tig00000650	1599205	G	A	0 0	0 0	0 0	0 0	0 0	0 0	0 0	0 0	0 0	0 1	0 0	0 0	0 0	0 0	0 0	0 0	0 0	0 0	0 0	0 5	0 0	0 0	0 0	0 0	0 0	0 0	0 0	0 0	0 0	0 0	0 0	0 0	0 0	0 0	0 0	0 0	0 7	4 0	0 0	0 0	0 0	0 1	0 4	5 1	0 1	0 0
tig00000650	1599207	A	T	0 0	0 0	0 0	0 0	0 0	0 0	0 0	0 0	0 0	0 3	0 0	0 0	0 0	0 0	0 0	0 0	0 0	0 0	0 0	0 5	0 0	0 0	0 0	0 0	0 0	0 0	0 0	0 0	0 0	0 0	0 0	0 0	0 0	0 0	0 0	0 0	0 8	0 12	0 16	0 7	0 2	0 6	0 6	0 15	0 11	0 4
tig00000650	1599212	C	T	0 0	0 0	0 0	0 0	0 0	0 0	0 0	0 0	0 0	0 3	0 0	0 0	0 0	0 0	0 0	0 0	0 0	0 0	0 0	0 5	0 0	0 0	0 0	0 0	0 0	0 0	0 0	0 0	0 0	0 0	0 0	0 0	0 0	0 0	0 0	0 0	0 8	0 12	2 14	2 6	0 1	4 2	2 4	0 15	0 11	0 4
tig00000650	1599230	C	G	0 0	0 0	0 0	0 0	0 0	0 0	0 0	0 0	0 0	0 3	0 0	0 0	0 0	0 0	0 0	0 0	0 0	0 0	0 0	0 9	0 1	0 0	0 0	0 0	0 0	0 0	0 0	0 0	0 0	0 0	0 0	0 0	0 0	0 0	0 0	0 0	2 3	0 10	0 16	0 4	0 3	0 5	6 3	0 10	0 3	0 3
tig00000650	1599230	C	T	0 0	0 0	0 0	0 0	0 0	0 0	0 0	0 0	0 0	0 3	0 0	0 0	0 0	0 0	0 0	0 0	0 0	0 0	0 0	0 9	0 1	0 0	0 0	0 0	0 0	0 0	0 0	0 0	0 0	0 0	0 0	0 0	0 0	0 0	0 0	0 0	0 3	2 10	4 16	4 4	0 3	1 5	0 3	1 10	2 3	0 3
tig00000650	1599230	CATA	TATC	0 0	0 0	0 0	0 0	0 0	0 0	0 0	0 0	0 0	0 3	0 0	0 0	0 0	0 0	0 0	0 0	0 0	0 0	0 0	0 9	0 1	0 0	0 0	0 0	0 0	0 0	0 0	0 0	0 0	0 0	0 0	0 0	0 0	0 0	0 0	0 0	0 3	0 10	0 16	0 4	0 3	0 5	0 3	0 10	0 3	0 3
tig00000650	1599245	C	T	0 0	0 0	0 0	0 0	0 0	0 0	0 0	0 0	0 0	0 0	0 0	0 0	0 0	0 0	0 1	0 0	0 0	0 1	0 0	0 9	0 1	0 0	0 0	0 0	0 0	0 0	0 2	0 0	0 0	0 0	0 0	0 0	0 0	0 0	0 0	0 0	2 3	5 7	0 20	0 7	0 2	0 7	5 4	0 14	0 7	0 4
tig00000650	1599257	ATTTAAAAAAACTGC	TTTTAAAAAACTAT	0 0	0 0	0 0	0 0	0 0	0 0	0 0	0 0	0 0	0 0	0 0	0 0	0 0	0 0	0 0	0 0	0 0	0 0	0 0	0 10	0 0	0 0	0 0	0 0	0 0	0 0	0 0	0 0	0 0	0 0	0 0	0 0	0 0	0 0	0 0	0 0	0 0	0 0	10 0	3 0	2 0	4 0	0 0	5 0	1 0	3 0
tig00000650	1599277	C	A	0 2	0 2	0 0	0 3	0 7	0 0	0 1	0 0	0 0	0 3	0 0	0 0	0 0	0 1	0 1	0 0	0 0	0 0	0 0	0 10	0 1	0 0	0 0	0 0	0 0	0 0	0 0	0 0	0 0	0 0	0 0	0 0	0 0	0 0	0 0	0 0	1 1	0 5	0 12	0 4	0 2	0 4	6 2	0 8	0 8	0 3
tig00000650	1599277	C	T	0 2	0 2	0 0	0 3	0 7	0 0	0 1	0 0	0 0	0 3	0 0	0 0	0 0	0 1	0 1	0 0	0 0	0 0	0 0	0 10	0 1	0 0	0 0	0 0	0 0	0 0	0 0	0 0	0 0	0 0	0 0	0 0	0 0	0 0	0 0	0 0	1 1	2 5	3 12	4 4	0 2	1 4	1 2	6 8	0 8	0 3
tig00000650	1599291	C	T	0 0	0 0	0 0	0 0	0 0	0 0	0 0	0 0	0 0	0 3	0 0	0 0	0 0	0 0	0 0	0 0	0 0	0 0	0 0	0 9	0 0	0 0	0 0	0 0	0 0	0 0	0 0	0 0	0 0	0 0	0 0	0 0	0 0	0 0	0 0	0 0	0 0	0 0	2 0	0 0	2 0	4 0	0 0	5 0	1 0	1 0
tig00000650	1599298	A	G	0 4	0 2	0 0	0 4	0 11	0 0	0 1	0 0	0 0	0 2	0 0	0 0	0 0	0 1	0 1	0 0	0 1	0 0	0 0	0 9	0 1	0 0	0 0	0 0	0 0	0 0	0 0	0 0	0 0	0 0	0 0	0 0	0 0	0 0	0 0	0 0	0 1	0 6	0 18	0 7	0 2	0 5	6 3	0 10	0 4	0 3
tig00000650	1599301	CGTGACC	TATGACG	0 0	0 0	0 0	0 0	0 0	0 0	0 0	0 0	0 0	0 0	0 0	0 0	0 0	0 0	0 0	0 0	0 0	0 0	0 0	0 9	0 0	0 0	0 0	0 0	0 0	0 0	0 0	0 0	0 0	0 0	0 0	0 0	0 0	0 0	0 0	0 0	0 0	3 0	4 0	4 0	0 0	1 0	0 0	4 0	0 0	0 0
tig00000650	1599305	ACC	GCG	4 0	2 0	0 0	3 0	10 0	0 0	1 0	0 0	0 0	0 0	0 0	0 0	0 0	0 0	1 0	0 0	1 0	0 0	0 0	0 9	0 0	0 0	0 0	0 0	0 0	0 0	0 0	0 0	0 0	0 0	0 0	0 0	0 0	0 0	0 0	0 0	1 0	0 0	0 0	0 0	0 0	0 0	0 0	0 0	0 0	0 0
tig00000650	1599312	G	A	0 4	0 2	0 0	0 4	0 11	0 0	0 1	0 0	0 0	0 0	0 0	0 0	0 0	0 1	0 1	0 0	0 1	0 0	0 0	0 9	0 1	0 0	0 0	0 0	0 0	0 0	0 0	0 0	0 0	0 0	0 0	0 0	0 0	0 0	0 0	0 0	0 1	3 0	4 2	4 0	0 0	1 0	0 1	3 1	0 2	0 0
tig00000650	1599317	C	CT	0 4	0 2	0 0	0 4	0 11	0 0	0 1	0 0	0 0	0 0	0 0	0 0	0 0	0 2	0 1	0 0	0 1	0 0	0 0	0 9	0 1	0 0	0 0	0 0	0 0	0 0	0 0	0 0	0 0	0 0	0 0	0 0	0 0	0 0	0 0	0 0	0 0	3 0	4 2	3 0	0 0	1 0	0 0	4 1	0 2	0 0
tig00000650	1599329	G	A	0 4	0 2	0 0	0 4	0 11	0 0	0 1	0 0	0 0	0 0	0 0	0 0	0 0	0 2	0 1	0 0	0 1	0 0	0 0	0 9	0 0	0 0	0 0	0 0	0 0	0 0	0 0	0 0	0 0	0 0	0 0	0 0	0 0	0 0	0 0	0 0	0 2	3 1	4 2	5 4	0 0	1 0	0 1	4 3	0 2	0 0
tig00000650	1599333	A	G	3 1	0 1	0 0	4 0	8 0	0 0	0 1	0 0	0 0	0 0	0 0	0 0	0 0	0 2	0 0	0 0	1 0	0 0	0 0	0 9	0 0	0 0	0 0	0 0	0 0	0 0	0 0	0 0	0 0	0 0	0 0	0 0	0 0	0 0	0 0	0 0	0 0	0 2	0 6	0 5	0 0	0 1	0 0	0 4	0 2	0 0
tig00000650	1599333	A	T	0 1	0 1	0 0	0 0	0 0	0 0	0 1	0 0	0 0	0 0	0 0	0 0	0 0	0 2	0 0	0 0	0 0	0 0	0 0	0 9	0 0	0 0	0 0	0 0	0 0	0 0	0 0	0 0	0 0	0 0	0 0	0 0	0 0	0 0	0 0	0 0	2 0	1 2	0 6	4 5	0 0	0 1	1 0	1 4	0 2	0 0
tig00000650	1599339	ACGTCAT	GAGCCAC	0 0	0 0	0 0	0 0	0 0	0 0	0 0	0 0	0 0	0 0	0 0	0 0	0 0	0 0	0 0	0 0	0 0	0 0	0 0	0 5	0 0	0 0	0 0	0 0	0 0	0 0	0 0	0 0	0 0	0 0	0 0	0 0	0 0	0 0	0 0	0 0	0 0	2 0	4 0	4 0	0 0	1 0	0 0	4 0	0 0	0 0
tig00000650	1599339	ACGT	GCGC	0 0	0 0	0 0	0 0	0 0	0 0	0 0	0 0	0 0	0 0	0 0	0 0	0 0	1 0	0 0	0 0	0 0	0 0	0 0	0 5	0 0	0 0	0 0	0 0	0 0	0 0	1 0	0 0	0 0	0 0	0 0	0 0	0 0	0 0	0 0	0 0	2 0	1 0	0 0	4 0	0 0	0 0	0 0	1 0	0 0	0 0
tig00000650	1599350	C	T	0 3	0 3	0 3	0 0	0 0	0 0	0 0	0 1	0 2	0 0	0 4	0 0	0 2	1 3	0 0	0 0	0 2	0 3	0 1	0 6	0 4	0 1	0 2	0 1	0 2	0 3	0 5	0 2	0 0	0 2	0 1	0 0	0 0	0 0	0 0	0 0	0 6	2 1	4 0	4 6	0 0	1 1	0 4	4 4	0 0	0 0
tig00000650	1599356	GC	G	0 4	0 3	0 3	0 0	0 0	0 0	0 0	0 2	0 2	0 0	0 4	0 0	0 2	0 3	0 0	0 0	0 2	0 4	0 1	0 5	0 4	0 1	0 2	0 1	0 2	0 3	0 5	0 2	0 0	0 2	0 0	0 0	0 0	0 0	0 0	0 0	2 0	1 0	0 0	4 0	0 5	1 0	0 0	3 0	0 0	0 0
tig00000650	1599357	C	G	0 4	0 3	0 3	0 0	0 0	0 0	0 0	0 2	0 2	0 0	0 4	0 0	0 2	1 3	0 0	0 0	0 2	0 4	0 1	0 5	0 4	0 1	0 2	0 1	0 2	0 3	0 5	0 2	0 0	0 2	0 0	0 0	0 0	0 0	0 0	0 0	0 0	5 0	4 0	4 0	0 5	1 0	0 0	4 0	0 0	0 0
tig00000650	1599370	AGTTGC	GGTTGT	0 0	0 0	0 0	0 0	0 0	0 0	0 0	0 0	0 0	0 0	0 0	0 0	0 0	0 0	0 0	0 0	0 0	0 0	0 0	0 4	0 0	0 0	0 0	0 0	0 0	0 0	0 0	0 0	0 0	0 0	0 0	0 0	0 0	0 0	0 0	0 0	0 0	5 0	4 0	4 0	0 0	1 0	0 0	3 0	0 0	0 0
tig00000650	1599380	C	T	0 2	0 0	0 0	0 0	0 0	0 0	0 0	0 0	0 0	0 0	0 1	0 0	0 3	0 0	0 1	0 0	0 0	0 0	0 1	0 5	0 0	0 0	0 1	0 1	0 0	0 0	0 1	0 3	0 3	0 3	0 0	0 0	0 0	0 0	0 0	0 0	0 0	3 2	6 0	0 7	0 0	0 3	0 0	4 1	0 1	0 5
tig00000650	1599380	CAAGT	TAAGC	0 2	0 0	0 0	0 0	0 0	0 0	0 0	0 0	0 0	0 0	0 1	0 0	0 3	0 0	0 1	0 0	0 0	0 0	0 1	0 5	0 0	0 0	0 1	0 1	0 0	2 0	0 1	0 3	0 3	0 3	0 0	0 0	0 0	0 0	0 0	0 0	2 0	0 2	0 0	0 7	0 0	0 3	3 0	0 1	0 1	0 5
tig00000650	1599384	T	C	4 2	0 0	0 0	0 0	0 0	0 0	1 0	0 0	0 0	0 0	0 1	0 0	0 3	1 0	0 1	0 0	0 0	0 0	0 1	0 5	1 0	0 0	0 1	0 1	0 0	0 0	0 1	1 3	0 3	0 3	0 0	0 0	0 0	0 0	0 0	0 0	3 0	2 2	0 0	0 7	6 0	1 3	0 0	3 1	3 1	0 5
tig00000650	1599384	TGC	CGT	0 2	3 0	3 0	0 0	0 0	0 0	0 0	3 0	0 0	0 0	4 1	0 0	2 3	0 0	0 1	0 0	2 0	4 0	1 1	0 5	2 0	0 0	4 1	0 1	0 0	0 0	5 1	2 3	1 3	1 3	0 0	0 0	0 0	0 0	0 0	0 0	0 0	0 2	0 0	0 7	0 0	0 3	0 0	0 1	1 1	2 5
tig00000650	1599386	C	T	0 2	0 0	0 0	0 0	0 0	0 0	0 0	0 0	0 0	0 0	0 1	0 0	0 3	0 0	0 1	0 0	0 0	0 0	0 1	0 5	0 0	0 0	0 1	0 1	0 0	0 0	0 1	0 3	0 3	0 3	0 0	0 0	0 0	0 0	0 0	0 0	3 0	1 2	2 0	1 7	1 0	2 3	0 0	0 1	1 1	0 5
tig00000650	1599389	G	A	0 6	0 3	0 3	0 0	0 1	0 0	0 4	0 3	0 4	0 0	0 5	0 0	0 5	0 5	0 1	0 0	0 2	0 4	0 2	0 5	0 5	0 2	0 5	0 1	0 2	0 3	0 6	0 6	0 3	0 7	0 0	0 0	0 0	0 0	0 0	0 0	0 2	5 0	4 2	4 1	0 9	0 3	0 0	3 0	0 6	0 3
tig00000650	1599389	GGTGGCG	TGTGACA	0 6	0 3	0 3	0 0	0 1	0 0	0 4	0 3	0 4	0 0	0 5	0 0	0 5	0 5	0 1	0 0	0 2	0 4	0 2	0 5	0 5	0 2	0 5	0 1	0 2	0 3	0 6	0 6	0 3	0 7	0 0	0 0	0 0	0 0	0 0	0 0	2 2	1 0	0 2	4 1	0 9	1 3	0 0	3 0	0 6	0 3
tig00000650	1599390	GTGGCGCTT	ATGGCACTC	0 6	0 3	0 3	0 0	0 1	0 0	0 4	0 3	0 4	0 0	0 5	0 0	0 5	0 5	0 1	0 0	0 2	0 4	0 2	0 5	0 5	0 2	0 5	0 1	0 2	0 3	0 6	0 6	0 3	0 7	0 0	0 0	0 0	0 0	0 0	0 0	0 2	0 0	2 2	3 1	0 9	2 3	0 0	1 0	1 6	5 3
tig00000650	1599402	C	T	4 0	1 2	0 3	0 0	0 0	0 0	3 0	0 3	3 2	0 1	0 4	0 0	0 2	1 3	0 0	0 0	0 2	0 4	0 1	0 4	1 4	1 0	1 4	1 1	0 2	0 3	1 5	1 2	0 1	1 2	0 2	0 0	0 0	0 0	0 0	0 0	0 2	0 5	0 6	0 14	0 9	0 3	0 1	0 9	3 1	0 5
tig00000650	1599403	T	G	0 0	0 2	0 3	0 0	0 0	0 0	0 0	0 3	0 2	0 1	0 4	0 0	0 2	0 3	0 0	0 0	0 2	0 4	0 1	0 4	0 4	0 0	0 4	0 1	0 2	0 3	0 5	0 2	0 1	0 2	0 2	0 0	0 0	0 0	0 0	0 0	2 2	0 5	1 6	1 14	0 9	3 3	0 1	0 9	0 1	0 5
tig00000650	1599404	T	G	2 0	0 2	0 3	0 0	0 0	0 0	0 0	0 3	0 2	0 1	0 4	0 0	2 2	0 3	0 0	0 0	0 2	0 4	0 1	0 4	0 4	0 0	0 4	0 1	0 2	0 3	0 5	2 2	3 1	0 2	0 2	0 0	0 0	0 0	0 0	0 0	0 2	0 5	0 6	0 14	0 9	0 3	0 1	0 9	0 1	0 5
tig00000650	1599405	GGGCACTCATAGGC	TGGTACTCACAGGT	0 6	0 1	0 0	0 0	0 1	0 0	0 6	0 0	0 4	0 1	0 0	0 1	0 0	0 1	0 0	0 0	0 0	0 0	0 0	0 3	0 1	0 1	0 2	0 2	0 0	0 0	0 2	0 2	0 1	0 4	0 0	0 0	0 0	0 0	0 0	0 0	0 0	0 0	2 0	3 0	0 0	2 0	0 0	1 0	1 0	5 0
tig00000650	1599425	TAAGG	CAAGC	2 0	1 0	0 1	0 0	0 0	0 0	3 0	0 2	3 1	0 0	0 1	0 0	0 1	1 3	0 0	0 0	0 2	0 2	0 0	0 4	1 3	1 0	1 4	1 1	0 2	0 0	1 5	1 1	0 1	2 1	0 2	0 0	0 0	0 0	0 0	0 0	0 2	0 1	0 2	0 10	0 0	0 3	0 1	0 5	0 1	0 5
tig00000650	1599427	AGGC	TGGG	0 0	0 0	0 1	0 0	0 0	0 0	0 0	0 2	0 1	0 0	0 1	0 0	0 1	0 3	0 0	0 0	0 2	0 2	0 0	0 4	0 3	0 0	0 4	0 1	0 2	0 0	0 5	0 1	0 1	0 1	0 2	0 0	0 0	0 0	0 0	0 0	3 2	1 1	2 2	1 10	2 0	3 3	0 1	0 5	1 1	0 5
tig00000650	1599433	G	T	0 5	0 1	0 1	0 0	0 0	0 0	1 4	0 2	0 4	1 0	0 1	0 1	0 2	0 4	0 0	0 0	0 2	0 2	0 0	0 4	0 4	0 1	0 5	0 4	0 1	0 1	0 6	0 2	0 2	0 6	0 1	0 0	0 0	0 0	0 0	0 0	1 3	1 1	0 4	7 5	0 3	1 5	1 1	4 1	0 5	0 6
tig00000650	1599439	G	A	0 4	0 1	1 0	0 0	0 0	0 0	0 5	1 0	0 3	0 1	1 0	0 1	0 2	2 1	0 0	0 0	2 0	1 0	0 0	0 4	0 1	0 1	3 1	0 3	1 0	0 0	3 1	1 1	1 1	1 4	0 2	0 0	0 0	0 0	0 0	0 0	0 3	0 2	2 2	3 9	0 2	2 4	0 2	1 4	1 4	4 1
tig00000650	1599445	GT	AC	0 0	0 0	0 0	0 0	0 0	0 0	0 0	0 0	0 0	0 0	0 0	0 0	0 0	0 0	0 0	0 0	0 0	0 0	0 0	0 4	0 0	0 0	0 0	0 0	0 0	0 0	0 0	0 0	0 0	0 0	2 0	0 0	0 0	0 0	0 0	0 0	0 3	1 1	2 2	6 1	0 1	1 3	0 0	4 0	0 1	0 0
tig00000650	1599446	T	C	0 0	0 0	0 0	0 0	0 0	0 0	0 0	1 0	0 0	0 0	0 0	0 0	2 0	1 0	0 0	0 0	0 0	1 0	0 0	0 4	0 0	0 0	1 0	1 0	0 0	0 0	0 0	0 0	0 0	1 0	0 0	0 0	0 0	0 0	0 0	0 0	0 3	0 1	0 2	1 1	0 1	0 3	0 0	0 0	1 1	4 0
tig00000650	1599449	G	C	0 2	0 0	0 0	0 0	0 0	0 0	0 0	0 1	0 0	0 0	0 0	0 0	0 2	0 0	0 0	0 0	0 0	0 0	0 0	0 4	0 0	0 0	0 1	0 1	0 0	0 0	0 0	0 0	0 0	0 1	0 2	0 0	0 0	0 0	0 0	0 0	3 0	1 1	2 2	1 9	1 0	3 3	0 0	0 5	0 1	0 3
tig00000650	1599454	A	G	0 0	0 0	0 0	0 0	0 0	0 0	0 0	0 0	0 0	0 0	0 0	0 0	0 0	0 0	0 0	0 0	0 0	0 0	0 0	0 5	0 0	0 0	1 0	0 0	0 0	0 0	0 0	0 0	0 0	0 0	0 2	0 0	0 0	0 0	0 0	0 0	2 0	0 1	3 0	2 6	0 0	3 1	0 0	0 4	1 0	2 0
tig00000650	1599458	C	T	0 0	0 0	0 0	0 0	0 0	0 0	0 0	0 1	0 0	0 0	0 0	0 0	0 0	0 0	0 0	0 0	0 0	0 0	0 0	0 4	0 0	0 0	0 1	0 0	0 0	0 0	0 0	0 0	0 0	0 1	1 0	0 0	0 0	0 0	0 0	0 0	0 3	1 1	0 4	4 4	0 1	1 5	0 0	3 1	0 1	0 2
tig00000650	1599465	G	A	0 0	0 0	0 0	0 0	0 0	0 0	0 0	0 1	0 0	0 0	0 0	0 0	0 0	0 0	0 0	0 0	0 0	0 0	0 0	0 4	0 0	0 0	0 1	0 0	0 0	0 0	0 0	0 0	0 0	0 1	0 1	0 0	0 0	0 0	0 0	0 0	0 2	0 1	0 3	0 4	0 1	0 3	0 0	0 1	0 1	1 0
tig00000650	1599470	A	G	0 0	0 0	0 0	0 0	0 0	0 0	0 0	0 0	0 0	0 0	0 0	0 0	0 0	0 0	0 0	0 0	0 0	0 0	0 0	0 4	0 0	0 0	0 0	0 0	0 0	0 0	0 0	0 0	0 0	0 0	0 0	0 0	0 0	0 0	0 0	0 0	0 0	0 0	0 0	2 0	0 0	0 0	0 0	1 0	0 0	1 0
tig00000650	1599578	G	C	0 0	0 0	0 0	0 0	0 0	0 0	0 0	0 0	0 0	0 0	0 0	0 0	0 0	0 0	0 0	0 0	0 0	0 0	0 0	0 4	0 0	0 0	0 0	0 0	0 0	0 0	0 0	0 0	0 0	0 0	0 0	0 0	0 0	0 0	0 0	0 0	0 0	0 0	0 0	0 0	1 0	0 0	0 0	0 0	0 0	0 0
tig00000650	1599635	G	A	0 0	0 0	0 0	0 0	0 0	0 0	0 0	0 0	0 0	0 0	0 0	0 0	0 0	0 0	0 0	0 0	0 0	0 0	0 0	0 5	0 0	0 0	0 0	0 0	0 0	0 0	0 0	0 0	0 0	0 0	0 0	0 1	0 0	0 0	0 0	0 0	0 0	0 0	0 0	0 0	0 0	0 0	0 0	0 0	0 0	0 0
tig00000650	1599778	T	A	0 0	0 1	0 0	0 0	0 1	0 0	0 0	0 0	0 0	0 0	0 0	0 0	0 0	0 0	0 0	0 0	0 0	0 0	0 0	0 3	0 0	0 0	0 0	0 0	0 0	0 0	0 1	0 0	0 0	0 0	0 2	0 0	0 0	0 0	0 0	0 0	0 0	0 0	0 0	0 0	0 0	0 0	0 0	0 0	0 0	0 0
tig00000650	1599797	A	T	0 0	0 0	0 0	0 0	0 0	0 0	0 0	0 0	0 0	0 0	0 0	0 0	0 0	0 0	0 0	0 0	0 0	0 0	0 0	0 4	0 0	0 0	0 0	0 0	0 0	0 0	0 0	0 0	0 0	0 0	0 0	0 0	0 0	0 0	0 0	0 0	0 0	0 0	0 0	0 0	0 0	0 0	0 0	0 0	0 0	0 0
tig00000650	1599797	AT	TA	0 0	0 0	0 0	0 0	0 0	0 0	0 0	0 0	0 0	0 0	0 0	0 0	0 0	0 0	0 0	0 0	0 0	0 0	0 0	0 4	0 0	0 0	0 0	0 0	0 0	0 0	0 0	0 0	0 0	0 0	0 0	0 0	0 0	0 0	0 0	0 0	0 0	0 0	0 0	0 0	0 0	0 0	0 0	0 0	0 0	0 0
tig00000650	1599994	C	T	0 0	0 0	0 0	0 0	0 0	0 0	0 0	0 0	0 0	0 3	0 0	0 0	0 0	0 0	0 0	0 0	0 0	0 0	0 0	0 7	0 0	0 0	0 0	0 0	0 0	0 0	0 1	0 0	0 0	0 0	0 0	0 0	0 0	0 0	0 0	0 0	0 0	2 0	0 0	0 1	0 0	1 0	0 1	0 1	0 1	0 0
tig00000650	1600012	C	T	0 0	0 0	0 0	0 0	0 0	0 0	0 0	0 0	0 0	0 4	0 0	0 0	0 0	0 0	0 0	0 0	0 0	0 0	0 0	0 8	0 0	0 0	0 0	0 0	0 0	0 0	0 1	0 0	0 0	0 0	0 0	0 0	0 0	0 0	0 0	0 0	0 0	2 0	0 0	0 1	0 0	0 1	0 1	0 1	0 1	0 0
tig00000650	1600021	T	C	0 0	0 0	0 0	0 0	0 0	0 0	0 0	0 0	0 0	0 4	0 0	0 0	0 0	0 0	0 0	0 0	0 0	0 0	0 0	0 8	0 1	0 0	0 0	0 0	0 0	0 0	0 1	0 0	0 0	0 0	0 0	0 0	0 0	0 0	0 0	0 0	0 0	0 2	0 0	0 1	0 0	0 1	0 1	0 1	0 1	0 0
tig00000650	1600043	A	T	0 0	0 0	0 0	0 0	0 0	0 0	0 0	0 0	0 0	0 6	0 0	0 0	0 0	0 0	1 0	0 0	0 0	0 0	0 0	0 8	2 0	0 0	0 0	0 0	0 0	0 0	0 0	0 0	0 0	0 0	0 0	0 0	0 0	0 0	0 0	0 0	0 0	0 2	0 0	1 0	0 1	0 0	1 0	1 0	1 0	0 0
tig00000650	1600149	A	G	0 0	0 0	0 0	0 0	0 0	0 0	0 0	0 0	0 0	0 3	0 0	0 0	0 0	0 1	0 0	0 0	0 0	0 0	0 0	0 7	0 0	0 0	0 0	0 0	0 0	0 0	0 0	0 0	0 0	0 0	0 1	0 0	0 0	0 0	0 0	0 0	0 0	0 0	0 0	0 0	0 0	0 0	0 0	0 0	0 0	0 0
tig00000650	1600160	G	A	0 0	0 0	0 0	0 0	0 1	0 0	0 0	0 0	0 0	0 3	0 1	0 0	0 0	0 1	0 0	0 0	0 0	0 0	0 0	0 7	0 0	0 0	0 0	0 0	0 0	0 0	0 1	0 0	0 0	0 0	0 1	0 0	0 0	0 0	0 0	0 0	2 0	1 0	0 0	1 0	0 0	0 0	2 0	0 0	1 0	0 0
tig00000650	1600171	A	T	0 0	0 0	0 0	0 0	0 0	0 0	0 0	0 0	0 0	1 0	0 0	0 0	0 0	1 0	0 0	0 0	0 0	0 0	0 0	0 7	0 0	0 0	0 0	0 0	0 0	0 0	1 0	0 0	0 0	0 0	1 0	0 0	0 0	0 0	0 0	0 0	0 0	0 0	0 0	1 0	0 0	0 0	1 0	1 0	1 0	0 0
tig00000650	1600177	A	G	0 0	0 0	0 0	0 0	1 0	0 0	0 0	0 0	0 0	3 0	1 0	0 0	0 0	1 0	0 0	0 0	0 0	0 0	0 0	0 7	0 0	0 0	0 0	0 0	0 0	0 0	1 0	0 0	0 0	0 0	1 0	0 0	0 0	0 0	0 0	0 0	2 0	1 0	0 0	1 0	0 0	0 0	1 0	1 0	0 0	0 0
tig00000650	1600189	G	T	0 0	0 0	0 0	0 0	0 1	0 0	0 0	0 0	0 0	0 2	0 1	0 0	0 0	0 0	0 0	0 0	0 0	0 0	0 0	0 8	0 0	0 0	0 0	0 0	0 0	0 0	0 1	0 0	0 0	0 0	0 1	0 0	0 0	0 0	0 0	0 0	0 7	0 2	0 0	0 1	0 0	0 0	0 1	0 1	0 1	0 0
tig00000650	1600193	G	T	0 0	0 0	0 0	0 0	0 0	0 0	0 0	0 0	0 0	0 0	0 0	0 0	0 0	0 0	0 0	0 0	0 0	0 0	0 0	0 8	0 0	0 0	0 0	0 0	0 0	0 0	0 0	0 0	0 0	0 0	1 0	0 0	0 0	0 0	0 0	0 0	0 7	0 2	0 0	0 1	0 0	0 0	0 2	0 1	0 1	0 0
tig00000650	1600194	GCT	ACC	0 0	0 0	0 0	0 0	0 0	0 0	0 0	0 0	0 0	0 0	0 0	0 0	0 0	0 0	0 0	0 0	0 0	0 0	0 0	0 7	0 0	0 0	0 0	0 0	0 0	0 0	0 0	0 0	0 0	0 0	0 0	0 0	0 0	0 0	0 0	0 0	5 0	1 0	0 0	0 0	0 0	0 0	0 0	0 0	0 0	0 0
tig00000650	1600205	C	T	0 0	0 0	0 0	0 0	0 0	0 0	0 0	0 0	0 0	0 0	0 0	0 0	0 0	0 0	0 0	0 0	0 0	0 0	0 0	0 9	0 0	0 0	0 0	0 0	0 0	0 0	0 0	0 0	0 0	0 0	0 0	0 0	0 0	0 0	0 0	0 0	0 5	0 1	0 0	0 0	0 0	0 0	0 0	0 0	0 0	0 0
tig00000650	1600411	A	C	0 0	0 1	0 2	0 0	0 1	0 2	0 3	0 0	0 1	0 2	0 0	0 0	0 0	0 0	0 0	0 0	0 0	0 0	0 0	0 10	0 0	0 0	0 0	0 0	0 1	0 3	0 0	0 0	0 0	0 0	0 0	0 0	0 0	0 0	0 0	0 0	0 0	0 0	0 0	0 0	0 0	0 0	0 7	0 3	0 0	0 0
tig00000650	1600417	C	T	0 0	0 1	0 2	0 0	0 1	0 2	0 3	0 0	0 1	0 2	0 0	0 0	0 0	0 0	0 0	0 0	0 0	0 0	0 0	0 11	0 0	0 0	0 0	0 0	0 1	0 3	0 0	0 0	0 0	0 0	0 0	0 0	0 0	0 0	0 0	0 0	0 0	0 0	0 0	0 0	0 0	0 0	0 7	0 3	0 0	0 0
tig00000650	1600431	G	T	0 0	0 1	0 2	0 0	0 1	0 2	0 3	0 0	0 1	0 1	0 0	0 0	0 0	0 0	0 0	0 0	0 0	0 0	0 0	0 8	0 0	0 0	0 0	0 0	0 1	0 3	0 0	0 0	0 0	0 0	0 0	0 0	0 0	0 0	0 0	0 0	0 0	0 0	0 0	0 0	0 0	0 0	0 2	0 2	0 0	0 0
tig00000650	1600439	A	C	0 0	0 1	0 2	0 0	0 1	0 2	0 3	0 0	0 1	0 1	0 0	0 0	0 0	0 0	0 0	0 0	0 0	0 0	0 0	0 8	0 0	0 0	0 0	0 0	0 0	0 3	0 0	0 0	0 0	0 0	0 0	0 0	0 0	0 0	0 0	0 0	0 0	0 0	0 0	0 0	0 0	0 0	0 2	0 1	0 0	0 0
tig00000650	1600493	TATTA	T	0 0	0 0	0 0	0 0	0 0	0 0	0 0	0 0	0 0	0 0	0 0	0 0	0 0	0 0	0 0	0 0	0 0	0 0	0 0	0 13	0 0	0 0	0 0	0 0	0 0	0 0	0 0	0 0	0 0	0 0	0 0	0 0	0 0	0 0	0 0	0 0	1 0	0 0	0 0	1 0	0 0	0 0	3 0	1 0	0 0	0 0
tig00000650	1600503	T	C	0 0	0 0	0 0	0 0	0 0	0 0	0 0	0 0	0 0	0 0	0 0	0 0	0 0	0 0	0 0	0 0	0 0	0 0	0 0	0 13	0 0	0 0	0 0	0 0	0 0	0 0	0 0	0 0	0 0	0 0	0 0	0 0	0 0	0 0	0 0	0 0	1 0	1 0	0 0	2 0	0 0	0 0	3 0	1 0	1 0	0 0
tig00000650	1600569	A	G	0 0	0 0	0 0	0 0	0 0	0 0	0 0	0 0	0 0	0 0	0 0	0 0	0 0	0 0	0 0	0 0	0 0	0 0	0 0	0 15	0 0	0 0	0 0	0 0	0 0	0 0	0 0	0 0	0 0	0 0	0 0	2 0	1 0	0 0	0 0	0 0	0 0	0 0	0 0	2 0	0 0	0 0	3 0	1 0	1 0	0 0
tig00000650	1600593	A	T	0 0	0 0	0 0	0 0	0 0	0 0	0 0	0 0	0 0	0 0	0 0	0 0	0 0	0 0	0 0	0 0	0 0	0 0	0 0	0 16	0 0	0 0	0 0	0 0	0 0	0 0	0 0	0 0	0 0	0 0	0 0	0 0	1 0	0 0	0 0	0 0	0 0	0 0	0 0	0 0	0 0	0 0	0 0	0 0	0 0	0 0
tig00000650	1600603	C	T	0 0	0 0	0 0	0 0	0 0	0 0	0 0	0 0	0 0	0 0	0 0	0 0	0 0	0 0	0 0	0 0	0 0	0 0	0 0	0 14	0 0	0 0	0 0	0 0	0 0	0 0	0 0	0 0	0 0	0 0	0 0	0 1	0 1	0 0	0 0	0 0	0 0	0 0	0 0	2 0	0 0	0 0	0 0	0 0	0 0	0 0
tig00000650	1600692	T	A	0 0	0 0	0 0	0 0	0 0	0 0	0 0	0 0	0 0	0 0	0 0	0 0	0 0	0 0	0 0	0 0	0 0	0 0	0 0	0 11	0 0	0 0	0 0	0 0	0 0	0 0	0 0	0 0	0 0	0 0	0 0	0 0	0 1	0 0	0 0	0 0	0 0	0 0	0 0	0 0	0 0	0 0	0 0	0 0	0 0	0 0
tig00000650	1600734	A	C	0 0	0 0	0 0	0 0	0 0	0 0	0 0	0 0	0 0	0 0	0 0	0 0	0 0	0 0	0 0	0 0	0 0	0 0	0 0	0 7	0 0	0 0	0 0	0 0	0 0	0 0	0 0	0 0	0 0	0 0	0 0	0 0	0 1	0 0	0 0	0 0	0 1	0 1	0 0	0 0	0 0	0 0	0 0	0 1	0 0	0 0
tig00000650	1600772	C	T	0 0	0 0	0 0	0 0	0 0	0 0	0 0	0 0	0 0	0 0	0 0	0 0	0 0	0 0	0 0	0 0	0 0	0 0	0 0	0 12	0 0	0 0	0 0	0 0	0 0	0 0	0 0	0 0	0 0	0 0	0 0	0 0	2 0	0 0	0 0	0 0	1 0	1 0	0 0	0 0	0 0	0 0	0 0	1 0	0 0	0 0
tig00000650	1600812	A	G	0 0	0 0	0 0	0 1	0 0	0 0	0 0	0 0	0 0	0 0	0 0	0 0	0 0	0 0	0 0	0 0	0 0	0 0	0 0	0 10	0 0	0 0	0 0	0 0	0 0	0 0	0 0	0 0	0 0	0 0	0 0	0 0	0 4	0 0	0 0	0 0	1 2	2 0	2 0	0 0	0 0	0 0	0 0	5 0	0 1	1 0
tig00000650	1600837	C	T	0 0	0 0	0 0	0 1	0 0	0 0	0 0	0 0	0 0	0 0	0 0	0 0	0 0	0 0	0 0	0 0	0 0	0 0	0 0	0 13	0 0	0 0	0 0	0 0	0 0	0 0	0 0	0 0	0 0	0 0	0 0	0 0	3 1	0 0	0 0	0 0	2 1	0 2	0 3	0 1	0 0	0 0	2 0	0 5	1 0	0 1
tig00000650	1600854	AT	CA	0 0	0 0	0 0	0 0	0 0	0 0	0 0	0 0	0 0	0 0	0 0	0 0	0 0	0 0	0 0	0 0	0 0	0 0	0 0	0 12	0 0	0 0	0 0	0 0	0 0	0 0	0 0	0 0	0 0	0 0	0 0	0 0	0 0	0 0	0 0	0 0	0 0	0 0	0 0	0 0	0 0	0 0	0 0	0 0	0 0	0 0
tig00000650	1600855	T	A	0 0	0 0	0 0	0 0	0 0	0 0	0 0	0 0	0 0	0 0	0 0	0 0	0 0	0 0	0 0	0 0	0 0	0 0	0 0	0 12	0 0	0 0	0 0	0 0	0 0	0 0	0 0	0 0	0 0	0 0	0 0	0 0	3 0	0 0	0 0	0 0	2 0	2 0	3 0	1 0	0 0	0 0	2 0	5 0	0 0	1 0
tig00000650	1600864	T	C	0 0	0 0	0 0	0 0	0 0	0 0	0 0	0 0	0 0	0 0	0 0	0 0	0 0	0 0	0 0	0 0	0 0	0 0	0 0	0 11	0 0	0 0	0 0	0 0	0 0	0 0	0 0	0 0	0 0	0 0	0 2	0 0	0 4	0 0	0 0	0 0	1 3	2 1	3 0	1 1	0 0	0 0	2 4	5 1	0 1	1 0
tig00000650	1600870	GTAATTG	ATAATTA	0 0	0 0	0 0	0 0	0 0	0 0	0 0	0 0	0 0	0 0	0 0	0 0	0 0	0 0	0 0	0 0	0 0	0 0	0 0	0 6	0 0	0 0	0 0	0 0	0 0	0 0	0 0	0 0	0 0	0 0	0 0	0 0	0 0	0 0	0 0	0 0	1 0	0 0	0 0	1 0	0 0	0 0	3 0	1 0	0 0	0 0
tig00000650	1600876	G	A	0 0	0 0	0 0	0 0	0 0	0 0	0 0	0 0	0 0	0 0	0 0	0 0	0 0	0 0	0 0	0 0	0 0	0 0	0 0	0 6	0 0	0 0	0 0	0 0	0 0	0 0	0 0	0 0	0 0	0 0	0 0	0 0	2 0	0 0	0 0	0 0	0 0	0 0	0 0	0 0	0 0	0 0	2 0	4 0	0 0	0 0
tig00000650	1600876	GAT	AAA	0 0	0 0	0 0	0 0	0 0	0 0	0 0	0 0	0 0	0 0	0 0	0 0	0 0	0 0	0 0	0 0	0 0	0 0	0 0	0 6	0 0	0 0	0 0	0 0	0 0	0 0	0 0	0 0	0 0	0 0	0 0	0 0	0 0	0 0	0 0	0 0	1 0	1 0	3 0	1 0	0 0	0 0	0 0	1 0	0 0	1 0
tig00000650	1600897	G	A	0 1	0 1	0 2	0 2	0 0	0 1	0 0	0 1	0 2	0 0	0 0	0 0	0 3	0 2	0 0	0 0	0 5	0 0	0 1	0 9	0 1	0 0	0 0	0 0	0 2	0 2	0 0	0 2	0 3	0 0	0 5	0 2	0 5	0 0	0 0	0 0	0 3	0 3	0 4	0 2	0 0	0 0	2 12	4 4	0 3	0 2
tig00000650	1600898	A	T	0 1	2 1	0 2	0 2	0 0	1 1	3 0	0 1	0 2	0 0	0 0	0 0	0 3	3 2	0 0	3 0	0 5	0 0	0 1	0 9	0 1	0 0	0 0	0 0	0 2	2 2	0 0	0 2	0 3	0 0	0 5	0 2	0 5	0 0	0 0	0 0	0 3	0 3	0 4	0 2	0 0	0 0	0 12	0 4	0 3	0 2
tig00000650	1600916	G	A	0 2	0 3	0 2	0 5	0 2	0 1	0 4	0 2	0 2	0 2	0 0	0 0	0 3	0 5	0 0	0 3	0 5	0 0	0 2	0 10	0 1	0 0	0 1	0 0	0 2	0 4	0 0	0 2	0 3	0 0	0 6	0 4	0 3	0 0	0 0	0 0	1 5	1 4	0 6	0 3	0 0	0 1	0 14	0 13	1 2	0 3
tig00000650	1600923	C	A	0 2	0 4	0 2	0 5	0 3	0 2	0 4	0 2	0 2	0 2	0 0	0 0	0 3	0 5	0 0	0 3	0 5	0 0	0 2	0 11	0 1	0 0	0 1	0 2	0 3	0 4	0 0	0 2	0 4	0 0	0 6	0 4	0 5	0 0	0 0	0 0	1 3	3 2	1 9	0 4	0 0	0 2	2 18	1 13	1 2	0 5
tig00000650	1600938	C	T	0 3	0 4	0 2	0 5	0 3	0 2	0 5	0 2	0 2	0 4	0 0	0 0	0 4	0 7	0 0	0 3	0 6	0 0	0 2	0 12	0 1	0 1	0 1	0 2	0 4	0 4	0 0	0 2	0 5	0 0	0 6	0 3	0 7	0 0	0 0	0 0	0 5	0 7	3 6	0 6	0 2	1 1	0 23	3 10	0 3	6 1
tig00000650	1600939	CAAATG	AAAATA	0 3	0 3	0 1	0 5	0 2	0 2	0 4	0 2	0 1	0 2	0 0	0 0	0 0	0 5	0 0	0 3	0 1	0 0	0 1	0 12	0 0	0 0	0 1	0 0	0 3	0 4	0 0	0 0	0 2	0 0	0 4	0 2	0 7	0 0	0 0	0 0	0 1	2 1	0 0	0 0	0 0	0 0	3 0	0 2	0 1	0 0
tig00000650	1600939	CA	C	0 3	0 3	0 1	0 5	0 2	0 2	0 4	0 2	0 1	0 2	0 0	0 0	0 0	0 5	0 0	0 3	0 1	0 0	0 1	0 12	0 0	0 0	0 1	0 0	0 3	0 4	0 0	0 0	0 2	0 0	0 4	0 2	0 7	0 0	0 0	0 0	0 1	1 1	2 0	0 0	2 0	0 0	2 0	1 2	1 1	0 0
tig00000650	1600939	C	T	0 3	0 3	0 1	0 5	0 2	1 2	1 4	0 2	0 1	0 2	0 0	0 0	0 0	0 5	0 0	0 3	2 1	0 0	1 1	0 12	0 0	0 0	0 1	0 0	0 3	0 4	0 0	0 0	0 2	0 0	0 4	0 2	0 7	0 0	0 0	0 0	0 1	0 1	0 0	0 0	0 0	0 0	0 0	4 2	0 1	0 0
tig00000650	1600944	G	A	0 3	0 3	0 1	0 5	0 2	0 2	0 4	0 2	0 1	0 2	0 0	0 0	0 0	0 5	0 0	0 3	0 1	0 0	0 1	0 12	0 0	0 0	0 1	0 0	0 3	0 4	0 0	0 0	0 2	0 0	0 4	0 2	0 7	0 0	0 0	0 0	0 1	1 1	5 0	0 0	0 0	1 0	0 0	3 2	0 1	4 0
tig00000650	1600944	GTAT	ATAC	0 3	0 3	0 1	0 5	0 2	0 2	0 4	0 2	0 1	0 2	0 0	0 0	0 0	0 5	0 0	0 3	0 1	0 0	0 1	0 12	0 0	0 0	0 1	0 0	0 3	0 4	0 0	0 0	0 2	0 0	0 4	0 2	0 7	0 0	0 0	0 0	0 1	0 1	0 0	1 0	0 0	1 0	8 0	0 2	0 1	0 0
tig00000650	1600947	T	C	0 3	0 3	0 1	0 5	0 2	0 2	0 4	0 2	0 1	1 2	0 0	0 0	0 0	1 5	0 0	0 3	0 1	0 0	0 1	0 12	0 0	0 0	0 1	0 0	1 3	0 4	0 0	0 0	0 2	0 0	0 4	0 2	0 7	0 0	0 0	0 0	3 1	0 1	2 0	5 0	0 0	0 0	7 0	3 2	1 1	1 0
tig00000650	1600949	G	A	0 3	0 4	0 2	0 6	0 3	0 6	0 6	0 3	0 2	0 5	0 0	0 0	0 4	0 8	0 0	0 3	0 7	0 0	0 4	0 12	0 1	0 1	0 1	0 4	0 4	0 5	0 1	0 3	0 6	0 0	0 4	0 4	0 8	0 0	0 0	0 0	0 6	0 10	0 11	0 10	0 2	0 2	0 27	0 15	0 4	0 9
tig00000650	1600958	AT	A	0 3	0 4	0 1	0 6	0 3	0 5	0 6	0 2	0 1	0 4	0 0	0 0	0 2	0 7	0 0	0 3	0 4	0 0	0 5	0 8	0 0	0 1	0 1	0 4	0 3	0 5	0 1	0 3	0 4	0 0	0 3	0 3	0 6	0 0	0 0	0 0	0 8	2 6	0 12	0 10	0 2	0 1	3 22	0 13	0 4	0 7
tig00000650	1600965	C	T	0 3	0 4	0 1	0 6	0 3	0 5	0 6	1 2	0 1	1 4	0 0	0 0	0 2	1 7	0 0	0 3	0 4	0 0	0 5	0 8	0 0	0 1	0 1	0 4	2 3	0 5	0 1	0 3	0 4	0 0	0 3	0 3	0 6	0 0	0 0	0 0	0 8	0 6	2 12	0 10	0 2	1 1	0 22	2 13	0 4	2 7
tig00000650	1600972	C	T	0 5	0 1	0 3	0 11	0 13	0 2	0 2	0 5	0 1	0 2	0 0	0 0	0 2	0 5	0 1	0 3	0 7	0 0	1 0	0 8	0 1	0 0	0 1	0 2	0 5	0 3	0 0	0 4	0 8	0 0	0 1	0 6	4 4	0 0	0 0	0 0	0 2	0 6	3 6	0 1	0 0	1 1	0 26	3 19	2 3	4 3
tig00000650	1600974	C	T	1 5	0 1	1 3	2 11	1 13	4 2	5 2	0 5	0 1	0 2	0 0	0 0	0 2	0 5	0 1	0 3	3 7	0 0	3 0	0 8	2 1	0 0	0 1	3 2	0 5	4 3	2 0	0 4	0 8	0 0	0 1	0 6	0 4	0 0	0 0	0 0	3 2	5 6	5 6	4 1	3 0	0 1	5 26	0 19	2 3	0 3
tig00000650	1600990	T	C	0 5	0 0	0 0	0 7	0 14	0 0	0 0	0 1	0 0	0 1	0 0	0 0	0 0	0 1	0 1	0 0	0 7	0 0	0 0	0 6	0 0	0 0	0 0	0 0	0 2	0 0	0 0	0 2	3 0	0 0	0 0	4 0	2 0	0 0	0 0	0 0	0 1	5 0	3 4	1 0	0 0	0 0	5 0	7 8	2 0	1 2
tig00000650	1600995	A	G	6 12	0 12	0 11	10 12	14 20	0 15	0 12	0 6	0 11	0 9	0 3	0 1	0 3	0 9	1 1	0 6	8 11	0 0	0 11	0 6	0 8	0 3	0 1	0 6	0 17	0 11	0 5	0 2	0 8	0 1	0 2	0 5	0 8	0 0	0 0	0 0	1 10	6 15	4 16	1 11	0 4	0 6	5 29	6 23	5 8	6 11
tig00000650	1600997	T	G	0 20	4 8	0 11	0 24	0 35	0 17	0 13	0 6	0 11	0 10	0 3	0 1	0 3	0 11	0 2	0 6	0 20	0 0	0 10	0 4	0 8	0 3	0 1	0 6	0 18	0 11	0 6	0 4	0 8	0 1	0 2	0 5	0 8	0 0	0 0	0 0	0 11	0 21	0 20	0 13	0 4	0 6	0 34	0 29	0 13	0 17
tig00000650	1601000	TAAATT	AAAATC	0 8	0 10	0 9	0 13	0 14	0 15	0 13	0 4	4 3	0 5	0 0	0 0	0 3	0 9	0 1	0 3	0 11	0 0	0 6	0 3	0 7	0 1	0 0	0 6	0 11	0 11	0 4	0 1	0 7	0 1	0 1	0 0	0 2	0 0	0 0	0 0	0 3	0 10	0 6	0 2	0 4	0 0	0 9	0 6	0 5	0 1
tig00000650	1601000	TAAATTACATAC	AAAATTACATAT	0 8	0 10	0 9	0 13	0 14	0 15	0 13	0 4	0 3	0 5	0 0	0 0	0 3	0 9	0 1	0 3	0 11	0 0	0 6	0 3	0 7	0 1	0 0	0 6	0 11	0 11	0 4	0 1	0 7	0 1	0 1	0 0	0 2	0 0	0 0	0 0	0 3	0 10	0 6	0 2	0 4	0 0	0 9	0 6	0 5	0 1
tig00000650	1601000	T	C	1 8	1 10	0 9	0 13	4 14	2 15	0 13	1 4	2 3	3 5	2 0	0 0	0 3	0 9	0 1	0 3	1 11	1 0	1 6	0 3	1 7	0 1	1 0	0 6	4 11	0 11	0 4	0 1	1 7	0 1	2 1	5 0	6 2	0 0	0 0	0 0	1 3	1 10	4 6	0 2	0 4	0 0	0 9	8 6	0 5	0 1
tig00000650	1601000	TAAATTACATAC	CAAATTACATAG	5 8	0 10	0 9	11 13	10 14	0 15	0 13	0 4	0 3	0 5	0 0	0 0	0 3	0 9	1 1	0 3	3 11	0 0	0 6	0 3	0 7	0 1	0 0	0 6	0 11	0 11	0 4	0 1	0 7	0 1	0 1	0 0	0 2	0 0	0 0	0 0	1 3	6 10	5 6	1 2	0 4	0 0	4 9	6 6	5 5	6 1
tig00000650	1601000	TAAATTAC	GAAATTAA	0 8	0 10	0 9	0 13	0 14	0 15	0 13	0 4	0 3	0 5	0 0	0 0	0 3	0 9	0 1	0 3	0 11	0 0	0 6	0 3	0 7	0 1	0 0	0 6	0 11	0 11	0 4	0 1	0 7	0 1	0 1	0 0	0 2	0 0	0 0	0 0	0 3	0 10	0 6	0 2	0 4	0 0	0 9	0 6	0 5	0 1
tig00000650	1601007	C	T	0 8	0 10	0 9	0 13	1 14	0 15	0 13	1 4	0 3	1 5	0 0	0 0	0 3	1 9	0 1	0 3	0 11	0 0	0 6	0 3	0 7	0 1	0 0	0 6	1 11	0 11	0 4	0 1	0 7	0 1	0 1	0 0	0 2	0 0	0 0	0 0	3 3	2 10	3 6	6 2	0 4	3 0	17 9	5 6	2 5	2 1
tig00000650	1601011	C	T	0 8	0 10	0 9	0 13	0 14	0 15	0 13	0 4	0 3	0 5	0 0	0 0	0 3	0 9	0 1	0 3	0 11	0 0	1 6	0 3	0 7	0 1	0 0	0 6	0 11	0 11	0 4	0 1	0 7	0 1	0 1	0 0	0 2	0 0	0 0	0 0	0 3	0 10	0 6	0 2	0 4	0 0	0 9	0 6	0 5	0 1
tig00000650	1601038	TA	T	5 39	6 30	4 33	0 40	10 69	7 27	2 26	5 20	5 32	11 22	6 2	0 2	2 5	3 30	2 14	5 14	3 45	4 10	10 20	0 5	1 11	4 11	3 8	0 12	7 28	2 30	4 16	2 5	4 11	3 6	0 11	0 18	0 10	0 0	0 0	0 0	0 3	0 5	0 4	0 2	0 4	0 0	0 5	0 1	0 4	0 0
tig00000650	1601041	A	C	0 39	0 30	0 33	0 40	0 69	0 27	0 26	0 20	0 32	0 22	0 2	0 2	0 5	0 30	0 14	0 14	0 45	0 10	0 20	0 5	0 11	0 11	0 8	0 12	0 28	0 30	0 16	0 5	0 11	0 6	0 11	0 18	0 10	0 0	0 0	0 0	0 3	0 5	0 4	0 2	0 4	0 0	0 5	0 1	0 4	1 0
tig00000650	1601042	C	A	0 39	0 30	0 33	0 40	0 69	0 27	0 26	0 20	0 32	0 22	0 2	0 2	0 5	0 30	0 14	0 14	0 45	0 10	0 20	0 5	0 11	0 11	0 8	0 12	0 28	0 30	0 16	0 5	0 11	0 6	0 11	0 18	0 10	0 0	0 0	0 0	2 3	10 5	6 4	2 2	0 4	0 0	6 5	12 1	5 4	7 0
tig00000650	1601044	T	A	0 39	0 30	0 33	0 40	0 69	0 27	0 26	0 20	0 32	0 22	0 2	0 2	0 5	0 30	0 14	0 14	0 45	0 10	0 20	0 5	0 11	0 11	0 8	0 12	0 28	0 30	0 16	0 5	0 11	0 6	0 11	0 18	0 10	0 0	0 0	0 0	0 3	0 5	0 4	0 2	0 4	0 0	0 5	4 1	1 4	0 0
tig00000650	1601045	G	A	0 39	0 30	0 33	0 40	0 69	0 27	0 26	0 20	0 32	0 22	0 2	0 2	0 5	0 30	0 14	0 14	0 45	0 10	0 20	0 5	0 11	0 11	0 8	0 12	0 28	0 30	0 16	0 5	0 11	0 6	0 11	0 18	0 10	0 0	0 0	0 0	2 3	0 5	0 4	1 2	0 4	5 0	12 5	6 1	2 4	1 0
tig00000650	1601047	ATCCTGCCATGTACATG	GTCCTGCCATGTACACA	0 0	0 0	0 0	0 0	0 0	0 0	0 0	0 0	0 0	0 0	0 0	0 0	0 0	0 0	0 0	0 0	0 0	0 0	0 0	0 4	0 0	0 0	0 0	0 0	0 0	0 0	0 0	0 0	0 0	0 0	0 0	0 0	0 0	0 0	0 0	0 0	2 0	10 0	6 0	2 0	0 0	0 0	4 0	10 0	5 0	10 0
tig00000650	1601074	C	T	0 39	0 32	0 25	0 25	0 67	0 24	0 20	0 22	4 31	0 27	0 11	0 2	0 7	0 36	0 17	0 19	0 38	2 12	0 25	0 5	0 3	0 17	0 9	0 9	0 39	0 24	0 19	0 5	0 15	0 6	0 10	0 21	0 5	0 0	0 0	0 0	0 0	0 0	0 0	0 0	0 0	0 0	0 0	0 0	0 2	0 0
tig00000650	1601074	CCTTG	TCTTA	0 39	0 32	0 25	0 25	0 67	0 24	0 20	0 22	0 31	0 27	0 11	0 2	0 7	0 36	0 17	0 19	0 38	0 12	0 25	0 5	0 3	0 17	0 9	0 9	0 39	0 24	0 19	0 5	0 15	0 6	0 10	0 21	0 5	0 0	0 0	0 0	1 0	2 0	3 0	2 0	2 0	0 0	2 0	1 0	0 2	0 0
tig00000650	1601074	CCTTGGG	TCTTAGA	0 39	0 32	0 25	0 25	0 67	0 24	0 20	0 22	0 31	0 27	0 11	0 2	0 7	0 36	0 17	0 19	0 38	0 12	0 25	0 5	0 3	0 17	0 9	0 9	0 39	0 24	0 19	0 5	0 15	0 6	0 10	0 21	1 5	0 0	0 0	0 0	0 0	0 0	0 0	0 0	0 0	0 0	0 0	0 0	0 2	0 0
tig00000650	1601075	C	A	0 39	0 32	0 25	0 25	0 67	0 24	0 20	0 22	0 31	0 27	0 11	0 2	0 7	0 36	0 17	0 19	0 38	0 12	0 25	0 5	0 3	0 17	0 9	0 9	0 39	0 24	0 19	0 5	0 15	0 6	0 10	0 21	0 5	0 0	0 0	0 0	3 0	14 0	7 0	2 0	0 0	0 0	7 0	12 0	5 2	10 0
tig00000650	1601078	G	A	0 39	6 32	3 25	0 25	0 67	0 24	0 20	0 22	3 31	0 27	0 11	0 2	0 7	0 36	0 17	0 19	5 38	0 12	0 25	0 5	0 3	0 17	0 9	0 9	0 39	0 24	0 19	0 5	0 15	0 6	0 10	0 21	0 5	0 0	0 0	0 0	0 0	0 0	0 0	0 0	0 0	0 0	0 0	0 0	0 2	0 0
tig00000650	1601080	G	A	2 39	4 32	6 25	8 25	3 67	4 24	5 20	1 22	1 31	1 27	0 11	0 2	0 7	0 36	1 17	0 19	4 38	0 12	3 25	0 5	1 3	0 17	0 9	1 9	2 39	9 24	0 19	1 5	0 15	0 6	0 10	0 21	0 5	0 0	0 0	0 0	0 0	0 0	0 0	0 0	0 0	0 0	0 0	0 0	0 2	0 0
tig00000650	1601080	G	T	0 39	0 32	0 25	0 25	0 67	0 24	0 20	0 22	0 31	0 27	0 11	0 2	0 7	0 36	0 17	0 19	0 38	0 12	0 25	0 5	0 3	0 17	0 9	0 9	0 39	0 24	0 19	0 5	0 15	0 6	0 10	0 21	0 5	0 0	0 0	0 0	0 0	0 0	0 0	0 0	0 0	0 0	0 0	0 0	0 2	0 0
tig00000650	1601083	C	T	0 39	0 32	0 25	0 25	0 67	0 24	0 20	0 22	0 31	0 27	0 11	0 2	0 7	0 36	0 17	0 19	0 38	0 12	0 25	0 5	0 3	0 17	0 9	0 9	0 39	0 24	0 19	0 5	0 15	0 6	2 10	0 21	0 5	0 0	0 0	0 0	0 0	0 0	0 0	0 0	0 0	0 0	0 0	0 0	0 2	0 0
tig00000650	1601095	ACCCAAGGCTAA	G	0 0	0 0	0 0	0 0	0 0	0 0	0 0	0 0	0 0	0 0	0 0	0 0	0 0	0 0	0 0	0 0	0 0	0 0	0 0	0 5	0 0	0 0	0 0	0 0	0 0	0 0	0 0	0 0	0 0	0 0	0 0	0 0	0 0	0 0	0 0	0 0	3 0	11 0	7 0	2 0	0 0	0 0	6 0	12 0	6 0	13 0
tig00000650	1601112	A	G	15 0	13 7	13 0	21 0	29 0	10 0	13 0	13 0	15 0	15 0	10 0	2 0	10 0	19 0	15 0	8 0	27 0	6 1	5 0	0 7	5 0	10 0	5 4	6 0	13 0	17 0	3 2	4 0	12 1	12 0	3 0	4 4	8 2	0 0	0 0	0 0	5 0	13 0	9 0	2 0	1 0	0 0	10 0	12 0	10 0	14 0
tig00000650	1601113	G	A	0 14	0 22	0 13	0 22	0 36	0 12	0 12	0 13	0 15	0 15	0 11	0 2	0 10	0 19	0 15	0 9	0 26	0 6	0 6	0 7	0 5	0 9	0 9	0 6	0 14	0 14	0 5	0 4	0 13	0 11	0 3	0 8	0 10	0 0	0 0	0 0	0 5	0 14	0 9	0 2	0 1	0 0	0 10	0 13	0 10	0 14
tig00000650	1601122	G	A	0 12	1 18	0 11	0 20	0 30	0 10	0 14	0 15	0 12	0 15	0 7	0 2	0 8	0 14	0 13	0 11	0 24	0 6	0 5	0 8	0 5	0 10	0 9	0 7	0 13	0 13	0 5	0 4	0 11	0 13	0 2	0 4	0 10	0 0	0 0	0 0	3 2	13 1	7 2	2 0	0 1	0 0	6 4	12 0	9 1	13 0
tig00000650	1601123	A	G	0 12	0 15	0 9	0 20	0 28	0 9	0 14	0 15	0 11	0 13	0 6	0 2	0 7	0 11	0 12	0 11	0 23	0 5	0 5	0 7	0 5	0 9	0 5	0 6	0 13	0 12	0 3	0 4	0 11	0 13	0 1	0 2	0 7	0 0	0 0	0 0	2 3	0 13	0 7	0 2	0 0	0 0	0 6	0 12	0 9	0 14
tig00000650	1601131	TG	T	8 3	11 0	9 0	12 6	6 20	7 0	14 0	14 0	10 0	12 0	5 0	2 0	6 0	11 0	4 5	7 0	16 7	5 0	4 0	0 7	4 0	9 0	3 0	5 0	13 0	13 0	3 0	2 0	10 0	13 0	0 0	0 0	0 3	0 0	0 0	0 0	0 3	0 11	0 7	0 1	0 0	0 0	0 5	0 12	0 9	0 15
tig00000650	1601135	C	T	0 3	0 0	0 0	0 6	0 20	0 0	0 0	0 0	0 0	0 0	0 0	0 0	0 0	0 0	0 5	0 0	0 7	0 0	0 0	0 7	0 0	0 0	0 0	0 0	0 0	0 0	0 0	0 0	0 0	0 0	0 0	0 0	5 3	0 0	0 0	0 0	0 3	0 11	0 7	0 1	0 0	0 0	0 5	0 12	0 9	0 15
tig00000650	1601140	T	C	8 0	11 0	9 0	13 2	6 0	11 0	15 0	14 1	10 0	13 0	5 0	2 0	6 7	11 0	4 2	10 0	17 0	5 0	4 9	0 6	4 3	9 1	3 0	5 0	13 0	8 6	3 3	2 1	10 3	13 1	0 0	0 1	0 0	0 1	0 0	0 0	0 5	0 3	0 6	0 1	0 6	0 2	0 11	0 2	0 11	0 3
tig00000650	1601142	T	C	2 0	0 0	0 0	5 2	18 0	0 0	0 0	0 1	0 0	0 0	0 0	0 0	0 7	0 0	3 2	0 0	7 0	1 0	0 9	0 6	0 3	0 1	3 0	0 0	0 0	0 6	2 3	0 1	0 3	0 1	0 0	0 1	0 0	0 1	0 0	0 0	5 5	11 3	7 6	1 1	0 6	0 2	5 11	12 2	7 11	14 3
tig00000650	1601171	G	A	0 0	0 0	0 0	0 0	0 0	0 0	0 0	0 0	0 0	0 0	0 0	0 0	0 0	0 0	0 0	0 0	0 0	0 0	0 0	0 7	0 0	0 0	0 0	0 0	0 0	0 0	0 0	0 0	0 0	0 0	0 0	0 0	3 3	0 0	0 0	0 0	0 0	0 0	0 0	0 0	0 0	0 0	0 0	0 0	0 0	0 0
tig00000650	1601174	T	C	1 0	4 0	0 0	3 0	2 0	3 0	1 0	1 0	0 0	1 0	0 0	0 0	4 0	1 0	2 0	1 0	0 0	0 0	6 0	0 7	0 0	0 0	0 0	0 0	0 0	0 0	1 0	1 0	2 0	6 0	0 0	0 0	0 3	0 0	0 0	0 0	0 0	0 0	0 0	0 0	0 0	0 0	0 0	2 0	0 0	0 0
tig00000650	1601183	G	A	0 2	0 7	0 0	0 3	0 2	3 0	1 0	0 1	0 0	0 0	0 0	0 0	4 1	0 1	0 4	0 0	0 0	0 0	8 0	0 8	2 0	1 0	0 3	0 0	0 0	0 0	3 0	1 0	3 0	2 3	0 0	0 0	3 0	0 1	0 0	0 0	0 0	0 6	0 1	0 0	0 0	0 0	0 3	0 4	0 1	0 2
tig00000650	1601195	ACT	GCG	0 0	0 0	0 0	0 0	0 0	0 0	0 0	0 0	0 0	0 0	0 0	0 0	0 0	0 0	0 0	0 0	0 0	0 0	0 0	0 7	0 0	0 0	0 0	0 0	0 0	0 0	0 0	0 0	0 0	0 0	0 0	0 0	3 0	0 1	0 0	0 0	0 0	0 0	0 0	0 0	0 0	0 0	0 0	0 0	0 0	0 0
tig00000650	1601208	T	C	0 0	0 0	0 0	0 0	0 0	0 0	0 0	0 0	0 0	0 0	0 0	0 0	0 0	0 0	0 0	0 0	0 0	0 0	0 0	0 9	0 0	0 0	0 0	0 0	0 0	0 0	0 0	0 0	0 0	0 0	0 0	0 0	3 0	0 0	0 0	0 0	0 0	0 0	0 0	0 0	0 0	0 0	0 0	0 0	0 0	0 0
tig00000650	1601215	T	C	0 0	0 0	0 0	0 0	0 0	0 0	0 0	0 0	0 0	0 0	0 0	0 0	0 0	0 0	0 0	0 0	0 0	0 0	0 0	0 10	0 0	0 0	0 0	0 0	0 0	0 0	0 0	0 0	0 0	0 0	0 0	0 0	3 0	0 0	0 0	0 0	0 0	0 0	0 0	0 0	0 2	0 0	0 0	0 0	0 0	0 0
tig00000650	1601222	C	T	0 0	0 0	0 0	0 0	0 0	0 0	0 0	0 0	0 0	0 0	0 0	0 0	0 0	0 2	0 0	0 0	0 0	0 0	0 0	0 9	0 0	0 0	0 0	0 0	0 0	0 5	0 0	0 0	0 0	0 0	0 0	0 1	0 2	0 0	0 0	0 0	0 0	0 0	0 0	0 0	0 2	0 0	0 0	0 0	0 1	0 0
tig00000650	1601234	A	G	0 0	0 0	0 0	0 0	0 0	0 0	0 0	0 0	0 0	0 0	0 0	0 0	0 0	0 0	0 0	0 0	0 0	0 0	0 0	0 9	0 0	0 0	0 0	0 0	0 0	0 0	0 0	0 0	0 0	0 0	0 0	1 0	0 0	0 0	0 0	0 0	0 0	0 0	0 0	0 0	0 0	0 0	0 0	0 0	0 1	0 0
tig00000650	1601234	A	T	0 0	0 0	0 0	0 0	0 0	0 0	0 0	0 0	0 0	0 0	0 0	0 0	0 0	2 0	0 0	0 0	0 0	0 0	0 0	0 9	0 0	0 0	0 0	0 0	0 0	5 0	0 0	0 0	0 0	0 0	0 0	0 0	2 0	0 0	0 0	0 0	0 0	0 0	4 0	0 0	0 0	0 0	0 0	1 0	0 1	0 0
tig00000650	1601240	T	A	0 0	0 0	0 0	0 0	0 0	0 0	0 0	0 0	0 0	0 0	0 1	0 0	0 0	2 0	0 0	0 0	0 0	0 0	0 0	0 9	0 0	0 0	0 0	0 0	0 0	5 0	0 0	0 0	0 0	0 0	0 2	0 1	0 2	0 0	0 0	0 0	0 0	0 0	0 4	0 0	0 0	0 0	0 0	0 1	0 1	0 0
tig00000650	1601242	A	G	0 0	0 0	0 0	1 0	0 0	0 0	0 0	0 0	0 0	0 0	0 1	0 0	0 0	2 0	0 0	0 0	0 0	0 0	0 0	0 8	0 0	0 0	0 0	0 0	0 0	0 5	0 0	0 0	0 0	0 0	0 2	0 1	2 0	0 0	0 0	0 0	0 0	0 0	4 0	0 0	0 0	0 0	0 0	1 0	1 0	0 0
tig00000650	1601251	G	A	0 0	0 0	0 0	0 1	0 0	0 0	0 0	0 0	0 0	0 0	0 1	0 0	0 0	0 2	0 0	0 0	0 0	0 0	0 0	0 9	0 0	0 0	0 0	0 0	0 0	0 5	0 0	0 0	0 0	0 0	0 3	0 1	0 2	0 0	0 0	0 0	0 0	0 0	4 0	0 0	0 0	0 0	0 0	1 0	0 1	0 0
tig00000650	1601257	C	T	0 0	0 0	0 0	0 1	0 0	0 0	0 0	0 0	0 0	0 0	0 1	0 0	0 0	0 2	0 0	0 0	0 0	0 0	0 0	0 10	0 0	0 0	0 0	0 0	0 0	0 5	0 0	0 0	0 0	0 0	0 3	0 1	2 0	0 0	0 0	0 0	0 0	0 0	0 4	0 0	0 0	0 0	0 0	0 1	0 1	0 0
tig00000650	1601263	G	A	0 0	0 0	0 0	0 1	0 0	0 0	0 0	0 0	0 0	0 0	0 1	0 0	0 0	0 2	0 0	0 0	0 0	0 0	0 0	0 11	0 0	0 0	0 0	0 0	0 0	0 5	0 0	0 0	0 0	0 0	0 3	0 0	0 2	0 0	0 0	0 0	0 0	0 0	4 0	0 0	0 0	0 0	0 0	1 0	0 1	0 0
tig00000650	1601264	C	T	0 0	0 0	0 0	0 1	0 0	0 0	0 0	0 0	0 0	0 0	0 1	0 0	0 0	0 2	0 0	0 0	0 0	0 0	0 0	0 11	0 0	0 0	0 0	0 0	0 0	2 0	0 0	0 0	0 0	0 0	2 1	0 0	2 0	0 0	0 0	0 0	0 0	0 0	0 4	0 0	0 0	0 0	0 0	0 1	0 0	0 0
tig00000650	1601351	C	T	0 0	0 0	0 0	0 0	0 0	0 0	0 0	0 0	0 0	0 0	0 0	0 0	0 0	0 0	0 0	0 0	0 0	0 0	0 0	0 10	0 0	0 0	0 0	0 0	0 0	0 0	1 0	0 0	0 0	0 0	0 0	0 0	1 3	0 0	0 0	0 0	0 0	0 0	0 0	0 0	0 0	0 0	0 0	0 0	2 0	0 0
tig00000650	1601362	A	G	0 0	0 0	0 0	0 0	0 0	0 0	0 0	0 0	0 0	0 0	0 0	0 0	3 0	0 0	0 0	0 0	0 0	1 0	0 0	0 11	0 0	0 0	0 0	1 0	0 0	0 0	1 0	1 0	0 0	1 0	0 0	0 0	4 0	0 0	0 0	0 0	0 0	0 0	0 0	0 0	0 0	0 0	0 0	0 0	0 0	0 0
tig00000650	1601370	G	T	0 0	0 0	0 0	0 0	0 0	0 0	0 0	0 0	0 0	0 0	0 0	0 0	0 4	0 0	0 0	0 0	0 0	0 1	0 0	0 11	0 0	0 1	0 0	0 1	0 0	0 0	0 1	0 1	0 0	0 1	0 1	0 0	3 1	0 0	0 0	0 0	0 1	0 0	0 0	0 0	0 0	0 0	0 0	0 0	0 2	0 0
tig00000650	1601371	A	G	0 0	0 0	0 0	0 0	0 0	0 0	0 0	0 0	0 0	0 0	0 0	0 0	2 0	0 0	0 0	0 0	0 0	0 0	0 0	0 10	0 0	1 0	0 0	1 0	0 0	0 0	1 0	1 0	0 0	0 0	0 1	0 0	0 3	0 0	0 0	0 0	0 0	0 0	0 0	0 0	0 0	0 0	0 0	0 0	0 2	0 0
tig00000650	1601379	G	A	0 0	0 0	0 0	0 0	0 0	0 0	0 0	0 0	0 0	0 0	0 0	0 0	4 0	0 0	0 0	0 0	0 0	1 0	0 0	0 8	0 0	1 0	0 0	1 0	0 0	0 0	1 0	1 0	0 0	3 0	0 1	0 0	1 3	0 0	0 0	0 0	0 1	0 0	0 0	0 0	0 0	0 0	0 0	0 0	2 0	0 0
tig00000650	1601380	C	T	0 0	0 0	0 0	0 0	0 0	0 0	0 0	0 0	0 0	0 0	0 0	0 0	0 4	0 0	0 0	0 0	0 0	0 1	0 0	0 8	0 0	0 1	0 0	0 1	0 0	0 0	0 1	0 1	0 0	0 3	0 1	0 0	2 2	0 0	0 0	0 0	0 1	0 0	0 0	0 0	0 0	0 0	0 0	0 0	0 1	0 0
tig00000650	1601385	T	C	0 0	0 0	0 0	0 0	0 0	0 0	0 0	0 0	0 0	0 0	0 0	0 0	0 4	0 0	0 0	0 0	0 0	0 1	0 0	0 8	0 0	0 1	0 0	0 1	0 0	0 0	0 1	0 1	0 0	0 3	0 2	0 0	1 3	0 0	0 0	0 0	1 0	0 0	0 0	0 0	0 0	0 0	0 0	0 0	1 0	0 0
tig00000650	1601392	C	T	0 0	0 0	0 0	0 0	0 0	0 0	0 0	0 0	0 0	0 0	0 0	0 0	0 0	0 0	0 0	0 0	0 0	0 0	0 0	0 5	0 0	0 0	0 0	0 0	0 0	0 0	0 0	0 0	0 0	0 0	0 1	0 0	0 1	0 0	0 0	0 0	0 0	0 0	0 0	0 0	0 0	0 0	0 0	0 0	0 0	0 0
tig00000650	1601393	A	G	0 0	0 0	0 0	0 0	0 0	0 0	0 0	0 0	0 0	0 0	0 0	0 0	0 0	0 0	0 0	0 0	0 0	0 0	0 0	0 5	0 0	0 0	0 0	0 0	0 0	0 0	0 0	0 0	0 0	0 0	0 1	0 0	0 1	0 0	0 0	0 0	0 0	0 0	0 0	0 0	0 0	0 0	0 0	0 0	0 0	0 0
tig00000650	1601395	G	T	0 0	0 0	0 0	0 0	0 0	0 0	0 0	0 0	0 0	0 0	0 0	0 0	4 0	0 0	0 0	0 0	0 0	1 0	0 0	0 5	0 0	1 0	0 0	1 0	0 0	0 0	1 0	1 0	0 0	3 0	0 1	0 0	0 1	0 0	0 0	0 0	0 0	0 0	0 0	0 0	0 0	0 0	0 0	0 0	0 0	0 0
tig00000650	1601401	T	C	0 0	0 0	0 0	0 0	0 0	0 0	0 0	0 1	0 0	0 0	0 0	0 0	0 4	0 0	0 0	0 0	0 0	0 1	0 0	0 6	0 0	0 1	0 0	0 1	0 0	0 0	0 1	0 1	0 0	0 3	0 3	0 2	0 2	0 0	0 0	0 0	0 1	0 0	0 0	0 0	0 0	0 0	0 0	0 2	0 1	0 0
tig00000650	1601406	CTG	TTT	0 0	0 0	0 0	0 0	0 0	0 0	0 0	0 0	0 0	0 0	0 0	0 0	0 3	0 0	0 0	0 0	0 0	0 1	0 0	0 6	0 0	0 1	0 0	0 1	0 0	0 0	0 1	0 1	0 0	0 3	2 0	0 2	0 0	0 0	0 0	0 0	0 0	0 0	0 0	0 0	0 0	0 0	0 0	0 2	0 0	0 0
tig00000650	1601412	G	A	0 0	0 0	0 0	0 0	0 0	0 0	0 0	0 0	0 0	0 0	0 0	0 0	0 3	0 0	0 0	0 0	0 0	0 1	0 0	0 6	0 0	0 1	0 0	0 1	0 0	0 0	0 1	0 1	0 0	0 3	0 0	0 2	0 0	0 0	0 0	0 0	0 0	0 0	0 0	0 0	0 0	0 0	0 0	0 2	0 0	0 0
tig00000650	1601424	T	C	0 0	0 0	0 0	0 0	0 0	0 0	0 0	0 0	0 0	0 0	0 0	0 0	3 0	0 0	0 0	0 0	0 0	0 0	0 0	0 7	0 0	1 0	0 0	1 0	0 0	0 0	1 0	1 0	0 0	3 0	2 0	0 0	0 0	0 0	0 0	0 0	0 0	0 0	0 0	0 0	0 0	0 0	0 0	0 0	0 0	0 0
tig00000650	1601426	A	T	0 0	0 0	0 0	0 0	0 0	0 0	0 0	0 2	0 0	0 0	0 1	0 0	0 4	0 0	0 0	0 0	0 0	0 0	0 0	0 9	0 0	0 1	0 0	0 2	0 0	0 0	0 3	0 1	0 0	0 3	0 2	0 2	0 1	0 0	0 0	0 0	0 1	0 1	0 0	0 4	0 0	0 1	0 1	0 0	0 3	0 1
tig00000650	1601428	G	A	0 0	0 0	0 0	0 0	0 0	0 0	0 0	0 2	0 0	0 0	0 1	0 0	0 4	0 0	0 0	0 0	0 0	0 0	0 0	0 8	0 0	0 1	0 0	0 2	0 0	0 0	0 3	0 1	0 0	0 3	0 2	0 2	0 1	0 0	0 0	0 0	0 1	0 2	0 0	0 4	0 0	0 1	0 1	0 0	0 2	0 1
tig00000650	1601430	G	A	0 0	0 0	0 0	0 0	0 0	0 0	0 0	0 2	0 0	0 0	0 1	0 0	0 4	0 0	0 1	0 0	0 0	0 0	0 0	0 8	0 0	0 2	0 0	0 2	0 0	0 0	0 3	0 1	0 0	0 3	2 0	0 2	0 1	0 0	0 0	0 0	0 2	0 2	0 1	0 4	0 0	0 2	0 2	0 3	0 5	0 1
tig00000650	1601469	C	T	0 0	0 0	0 0	0 0	0 0	0 0	0 0	0 8	0 0	0 0	0 1	0 0	0 1	0 0	0 2	0 0	0 0	0 1	0 1	0 10	0 0	0 1	0 0	0 10	0 0	0 0	0 3	0 0	0 0	0 10	0 3	0 0	0 1	0 0	0 0	0 0	0 2	0 2	0 1	0 2	0 0	0 2	0 1	0 3	0 5	0 1
tig00000650	1601472	G	T	0 0	0 0	0 0	0 0	0 0	0 0	0 0	0 8	0 0	0 0	0 1	0 0	0 2	0 0	0 2	0 0	0 0	0 1	0 1	0 10	0 0	0 1	0 0	0 10	0 0	0 0	0 3	0 0	0 0	0 10	0 2	0 0	0 2	0 0	0 0	0 0	0 1	0 2	0 1	0 2	0 0	0 2	0 1	0 3	0 4	0 1
tig00000650	1601473	A	T	0 0	0 0	0 0	0 0	0 0	0 0	0 0	0 8	0 0	0 0	0 1	0 0	0 2	0 0	0 2	0 0	0 0	0 1	0 1	0 10	0 0	0 2	0 0	0 10	0 0	0 0	0 3	0 0	0 0	0 10	0 2	0 0	0 2	0 0	0 0	0 0	1 0	0 1	1 0	0 2	0 0	0 2	1 0	3 0	1 4	0 1
tig00000650	1601479	G	A	0 0	0 0	0 0	0 0	0 0	0 0	0 0	0 8	0 0	0 0	0 0	0 0	0 1	0 0	0 2	0 0	0 0	0 1	0 1	0 9	0 0	0 2	0 0	0 13	0 0	0 0	0 2	0 0	0 0	0 9	0 2	0 0	0 2	0 0	0 0	0 0	0 1	0 1	0 1	0 2	0 0	1 1	0 1	0 3	1 4	0 1
tig00000650	1601484	G	A	0 0	0 0	0 0	0 0	0 0	0 0	0 0	0 0	0 0	0 0	0 0	0 0	0 1	0 0	0 0	0 0	0 0	1 0	0 0	0 8	0 0	1 1	0 0	4 0	0 0	0 0	0 0	0 0	0 0	0 0	1 0	0 0	1 0	0 0	0 0	0 0	1 0	0 0	1 0	0 0	0 0	0 0	1 0	3 0	1 0	0 0
tig00000650	1601489	G	A	0 0	0 0	0 0	0 0	0 0	0 0	0 0	0 2	0 0	0 0	0 0	0 0	0 3	0 0	0 2	0 0	0 0	0 1	0 1	0 9	0 0	0 4	0 0	0 10	0 0	0 0	0 1	0 0	0 0	0 1	0 1	0 0	0 2	0 0	0 0	0 0	1 0	0 0	1 0	0 2	0 0	0 1	1 0	3 0	1 1	0 0
tig00000650	1601494	GCTG	ACTA	0 0	0 0	0 0	0 0	0 0	0 0	0 0	0 2	0 0	0 0	0 0	0 0	0 3	0 0	0 2	0 0	0 0	0 1	0 1	0 9	0 0	0 4	0 0	0 9	0 0	0 0	0 1	0 0	0 0	0 1	0 1	0 0	0 2	0 0	0 0	0 0	0 0	0 0	0 0	0 2	0 0	0 1	0 0	0 0	0 1	0 0
tig00000650	1601495	C	T	0 0	0 0	0 0	0 0	0 0	0 0	0 0	0 2	0 0	0 0	0 0	0 0	0 3	0 0	0 2	0 0	0 0	0 1	0 1	0 9	0 0	0 4	0 0	1 9	0 0	0 0	0 1	0 0	0 0	0 1	0 1	0 0	0 2	0 0	0 0	0 0	0 0	0 0	0 0	0 2	0 0	0 1	0 0	0 0	0 1	0 0
tig00000650	1601497	G	A	0 0	0 0	0 0	0 0	0 0	0 0	0 0	0 2	0 0	0 0	0 0	0 0	0 3	0 0	0 2	0 0	0 0	0 1	0 1	0 9	0 0	0 4	0 0	0 9	0 0	0 0	0 1	0 0	0 0	0 1	0 1	0 0	0 2	0 0	0 0	0 0	0 0	0 0	0 0	0 2	0 0	0 1	0 0	0 0	0 1	0 0
tig00000650	1601506	AAT	GAC	0 0	0 0	0 0	0 0	0 0	0 0	0 0	0 0	0 0	0 0	0 0	0 0	2 0	0 0	0 0	0 0	0 0	1 0	0 0	0 9	0 0	1 1	0 0	3 2	0 0	0 0	0 0	0 0	0 0	0 0	1 0	0 0	1 0	0 0	0 0	0 0	0 0	0 0	0 0	0 0	0 0	0 0	0 0	0 0	0 0	0 0
tig00000650	1601508	T	C	0 0	0 0	0 0	0 0	0 0	0 0	0 0	0 0	0 0	0 0	0 0	0 0	0 0	0 0	0 0	0 0	0 0	0 0	0 0	0 9	0 0	0 1	0 0	1 2	0 0	0 0	0 0	0 0	0 0	0 0	0 0	0 0	0 0	0 0	0 0	0 0	0 0	0 0	0 0	0 0	0 0	0 0	0 0	0 0	0 0	0 0
tig00000650	1601515	G	T	0 0	0 0	0 0	0 0	0 0	0 0	0 0	0 0	0 0	0 0	0 0	0 0	0 0	0 0	0 0	0 0	0 0	0 0	0 0	0 10	0 0	0 1	0 0	0 3	0 0	0 0	0 0	0 0	0 0	0 0	0 1	0 0	0 1	0 0	0 0	0 0	0 0	0 0	0 1	0 0	0 0	0 0	0 1	0 0	0 1	0 0
tig00000650	1601516	C	A	0 0	0 0	0 0	0 0	0 0	0 0	0 0	0 0	0 0	0 0	0 0	0 0	0 3	0 0	0 0	0 0	0 0	0 1	0 1	0 10	0 0	0 3	0 0	0 10	0 0	0 0	0 1	0 0	0 0	0 1	1 0	0 0	1 0	0 0	0 0	0 0	0 0	0 0	0 0	0 0	0 0	0 0	0 1	0 0	0 1	0 0
tig00000650	1601516	C	T	0 0	0 0	0 0	0 0	0 0	0 0	0 0	0 0	0 0	0 0	0 0	0 0	0 3	0 0	0 0	0 0	0 0	0 1	0 1	0 10	0 0	0 3	0 0	0 10	0 0	0 0	0 1	0 0	0 0	0 1	0 0	0 0	0 0	0 0	0 0	0 0	0 0	0 0	1 0	0 0	0 0	0 0	0 1	0 0	0 1	0 0
tig00000650	1601525	G	A	0 0	0 0	0 0	0 0	0 0	0 0	0 0	0 0	0 0	0 0	0 1	0 0	0 3	0 0	0 0	0 0	0 0	0 1	0 2	0 10	0 0	0 3	0 0	0 10	0 0	0 0	0 1	0 0	0 0	0 2	0 1	0 0	0 1	0 0	0 0	0 0	0 1	0 1	1 1	0 0	0 0	0 0	1 0	0 0	1 0	0 1
tig00000650	1601527	A	G	0 0	0 0	0 0	0 0	0 0	0 0	0 0	0 0	0 0	0 0	0 1	0 0	1 2	0 0	0 0	0 0	0 0	0 1	0 2	0 11	0 0	2 1	0 0	2 8	0 0	0 0	0 1	0 0	0 0	0 2	0 1	0 0	0 1	0 0	0 0	0 0	1 0	1 0	1 1	0 0	0 0	0 0	0 1	0 0	0 1	1 0
tig00000650	1601539	G	GA	0 0	0 0	0 0	0 0	0 0	0 0	0 0	0 0	0 0	0 0	0 0	0 0	0 0	0 0	0 0	0 0	0 0	0 0	0 0	0 7	0 0	0 0	0 0	0 0	0 0	0 0	0 0	0 0	0 0	0 0	0 0	0 0	2 0	0 0	0 0	0 0	0 0	0 0	0 0	0 0	0 0	0 0	0 0	0 0	0 0	0 0
tig00000650	1601547	AATT	TTA	0 0	0 0	0 0	0 0	0 0	0 0	0 0	0 0	0 0	0 0	0 0	0 0	0 0	0 0	0 0	0 0	0 0	0 0	0 0	0 7	0 0	0 0	0 0	0 0	0 0	0 0	0 0	0 0	0 0	0 0	0 0	0 0	0 0	0 0	0 0	0 0	0 0	1 0	1 0	1 0	0 0	0 0	0 0	0 0	0 0	1 0
tig00000650	1601551	ATATTAC	TATATTAT	0 0	0 0	0 0	0 0	0 0	0 0	0 0	0 0	0 0	0 0	0 0	0 0	0 0	0 0	0 0	0 0	0 0	0 0	0 0	0 7	0 0	0 0	0 0	0 0	0 0	0 0	0 0	0 0	0 0	0 0	0 0	0 0	0 0	0 0	0 0	0 0	0 0	0 0	0 0	0 0	0 0	0 0	0 0	0 0	0 0	0 0
tig00000650	1601558	A	T	0 0	0 0	0 0	0 0	0 1	0 0	0 0	0 0	0 0	0 0	0 2	0 1	0 7	0 0	0 0	0 1	0 0	0 1	0 2	0 11	0 0	0 4	0 0	0 8	0 0	0 0	0 2	0 1	0 0	0 1	0 0	0 3	0 2	0 0	0 0	0 0	0 2	0 1	0 1	0 1	0 1	0 0	0 0	0 2	0 0	0 1
tig00000650	1601559	G	T	0 0	0 0	0 0	0 0	0 1	0 0	0 0	0 0	0 0	0 0	0 2	0 1	0 6	0 0	0 0	0 0	0 0	0 1	0 2	0 10	0 0	0 2	0 0	0 7	0 0	0 0	0 1	0 1	0 0	0 1	0 0	0 1	2 0	0 0	0 0	0 0	0 1	0 1	0 1	0 1	0 1	0 0	0 0	0 2	0 0	0 1
tig00000650	1601563	G	A	0 0	0 0	0 0	0 0	0 1	0 0	0 0	0 0	0 0	0 0	0 2	0 1	0 6	0 0	0 0	1 0	0 0	0 1	0 2	0 10	0 0	0 2	0 0	0 7	0 0	0 0	0 1	0 1	0 0	0 1	0 0	0 1	0 0	0 0	0 0	0 0	0 1	0 1	0 1	0 1	0 1	0 0	0 0	0 2	0 0	0 1
tig00000650	1601572	CAA	C	0 0	0 0	0 0	0 0	0 1	0 0	0 0	0 0	0 0	0 0	0 0	0 0	0 0	0 0	0 0	0 1	0 0	0 0	0 0	0 7	0 0	0 0	0 0	0 0	0 0	0 0	0 0	0 0	0 0	0 0	0 0	0 0	0 0	0 0	0 0	0 0	0 0	0 0	0 0	0 0	0 0	0 0	0 0	0 0	1 0	0 0
tig00000650	1601579	AAAG	A	0 0	0 0	0 0	0 0	0 1	0 0	0 0	0 0	0 0	0 0	0 0	0 0	0 0	0 0	0 0	0 1	0 0	0 0	0 0	0 7	0 0	0 0	0 0	0 0	0 0	0 0	0 0	0 0	0 0	0 0	0 0	0 0	0 0	0 0	0 0	0 0	0 0	1 0	1 0	0 0	0 0	2 0	0 0	2 0	0 0	2 0
tig00000650	1601584	T	C	0 0	0 0	0 0	0 0	0 1	0 0	0 0	0 0	0 0	0 0	0 0	0 0	0 0	0 0	0 0	0 1	0 0	0 0	0 0	0 7	0 0	0 0	0 0	0 0	0 0	0 0	0 0	0 0	0 0	0 0	0 0	0 0	0 0	0 0	0 0	0 0	0 0	0 0	0 0	0 0	0 0	0 0	0 0	0 0	0 0	0 0
tig00000650	1601590	A	G	0 0	0 0	0 0	0 0	0 0	0 0	0 0	0 0	0 0	0 0	0 0	0 0	0 0	0 0	0 0	0 0	0 0	0 0	0 0	0 8	0 0	0 0	0 0	0 0	0 0	0 0	0 0	0 0	0 0	0 0	0 0	2 4	4 0	0 0	0 0	0 0	0 0	0 0	0 0	0 0	0 0	3 0	0 3	1 0	1 0	0 0
tig00000650	1601590	AAAAAGA	GAAAAG	0 0	0 0	0 0	0 0	0 0	0 0	0 0	0 0	0 0	0 0	0 0	0 0	0 0	0 0	0 0	0 0	0 0	0 0	0 0	0 8	0 0	0 0	0 0	0 0	0 0	0 0	0 0	0 0	0 0	0 0	0 0	0 4	0 0	0 0	0 0	0 0	0 0	2 0	1 0	1 0	0 0	0 0	0 3	2 0	0 0	2 0
tig00000650	1601610	G	A	0 0	0 0	0 0	0 0	0 0	0 0	0 0	0 0	0 0	0 0	2 0	1 0	7 0	0 0	0 0	0 0	0 0	1 0	4 0	0 8	0 0	0 0	0 0	4 0	0 0	0 0	2 0	2 0	0 0	4 0	0 0	0 4	0 0	0 0	0 0	0 0	0 0	0 0	0 0	0 0	0 0	0 0	0 3	0 0	0 0	0 0
tig00000650	1601611	C	T	0 0	0 2	0 0	0 0	0 1	0 0	0 0	0 0	0 1	0 0	0 2	0 2	0 10	0 0	0 0	0 1	0 1	0 1	0 5	0 9	0 1	0 2	0 1	0 5	0 2	0 0	0 3	0 3	0 2	0 6	0 4	0 5	0 8	0 0	0 0	0 0	0 2	0 3	0 2	0 1	0 3	0 3	0 4	0 7	0 1	0 3
tig00000650	1601615	G	A	0 0	0 2	0 0	0 0	0 1	0 0	0 0	0 0	0 1	0 0	0 1	0 2	0 10	0 0	0 0	0 1	0 1	0 1	0 5	0 9	0 1	0 2	0 1	0 5	0 2	0 0	0 4	0 3	0 2	0 6	0 4	0 9	1 7	0 0	0 0	0 0	0 3	0 3	0 2	0 1	0 3	0 2	0 3	0 6	0 1	0 3
tig00000650	1601616	C	T	0 0	2 0	0 0	0 0	0 1	0 0	0 0	0 0	0 1	0 0	0 1	0 2	0 10	0 0	0 0	0 1	0 1	0 1	0 4	0 10	0 1	0 2	0 1	0 5	0 1	0 0	0 4	0 3	0 2	0 5	0 4	0 12	1 6	0 0	0 0	0 0	0 3	0 3	0 2	0 1	0 2	0 3	0 4	0 6	0 1	0 3
tig00000650	1601620	ATTC	GTTT	0 0	0 2	0 0	0 0	0 1	0 0	0 1	0 1	0 0	0 0	0 0	0 1	0 2	0 1	0 0	0 1	0 0	0 0	0 0	0 10	0 1	0 0	0 0	0 0	0 3	0 1	0 0	0 0	0 1	0 1	0 4	0 10	0 8	0 0	0 0	0 0	0 3	0 3	0 2	0 2	0 3	0 4	0 4	0 8	0 1	0 3
tig00000650	1601623	C	A	0 0	0 2	0 0	0 0	0 1	0 0	0 1	0 1	0 0	0 0	1 0	1 1	7 2	0 1	0 0	0 1	0 0	2 0	4 0	0 10	0 1	2 0	1 0	4 0	0 3	0 1	4 0	3 0	0 1	4 1	0 4	0 10	0 8	0 0	0 0	0 0	0 3	0 3	0 2	0 2	0 3	0 4	0 4	0 8	0 1	0 3
tig00000650	1601624	C	T	0 0	0 2	0 0	0 0	0 1	0 0	0 1	0 1	0 1	0 0	0 1	0 2	0 9	0 1	0 0	0 1	0 0	0 2	0 4	0 11	0 0	0 2	0 1	0 4	0 3	0 1	0 4	0 3	0 1	0 5	0 4	0 12	0 9	0 0	0 0	0 0	3 0	3 0	2 0	2 0	1 2	2 2	0 4	5 2	2 0	3 0
tig00000650	1601630	A	G	0 0	0 2	0 0	0 0	0 1	0 0	0 1	0 1	0 1	0 0	0 1	0 2	0 9	0 1	0 0	0 1	0 1	0 2	0 3	0 11	0 1	0 2	0 1	0 4	0 3	0 1	0 5	0 3	0 2	0 6	0 5	0 11	0 9	0 0	0 0	0 0	0 3	0 4	0 2	0 2	0 3	0 4	0 3	0 8	0 4	0 3
tig00000650	1601635	G	T	0 0	0 2	0 0	0 0	0 1	0 0	0 1	0 1	0 1	0 0	0 0	0 2	0 9	0 1	0 0	0 1	0 1	0 2	0 4	0 10	0 1	0 2	0 1	0 5	0 3	0 1	0 4	0 2	0 2	0 6	1 4	0 11	6 3	0 0	0 0	0 0	0 4	0 4	0 2	0 2	0 3	0 4	0 2	0 8	0 4	0 3
tig00000650	1601636	C	A	0 0	0 2	0 0	0 0	0 1	0 0	0 1	0 1	0 1	0 0	0 0	0 2	3 6	0 1	0 0	0 1	0 1	2 0	2 2	0 10	0 1	0 2	1 0	0 4	0 3	0 1	3 2	0 3	0 2	5 1	0 5	0 11	0 9	0 0	0 0	0 0	0 1	0 1	0 0	0 0	0 1	0 2	0 3	0 1	0 2	0 0
tig00000650	1601636	C	T	0 0	0 2	0 0	0 0	0 1	0 0	0 1	0 1	0 1	0 0	0 0	0 2	0 6	0 1	0 0	0 1	0 1	0 0	0 2	0 10	0 1	0 2	0 0	0 4	0 3	0 1	0 2	0 3	0 2	0 1	0 5	0 11	0 9	0 0	0 0	0 0	3 1	3 1	2 0	2 0	2 1	2 2	0 3	5 1	2 2	3 0
tig00000650	1601641	T	C	0 0	0 2	0 0	0 0	0 0	0 0	0 1	0 1	0 1	0 0	0 0	0 1	6 3	0 1	0 0	0 0	0 1	2 0	3 0	0 9	0 1	0 1	0 0	3 1	0 2	0 1	2 0	1 0	0 2	5 1	2 4	1 3	6 3	0 0	0 0	0 0	0 1	0 1	0 0	0 0	0 0	2 0	0 0	2 0	0 0	0 0
tig00000650	1601641	TG	CA	0 0	0 2	0 0	0 0	0 0	0 0	0 1	0 1	0 1	0 0	0 0	0 1	0 3	0 1	0 0	0 0	0 1	0 0	0 0	0 9	0 1	0 1	0 0	0 1	0 2	0 1	0 0	0 0	0 2	0 1	0 4	0 3	0 3	0 0	0 0	0 0	0 1	0 1	0 0	0 0	0 0	0 0	0 0	0 0	0 0	0 0
tig00000650	1601642	G	A	0 0	0 2	0 0	0 0	0 0	0 0	0 1	0 1	0 1	0 0	0 0	0 1	0 3	0 1	0 0	0 0	0 1	0 0	0 0	0 9	0 1	0 1	0 0	0 1	0 2	0 1	0 0	0 0	0 2	0 1	0 4	0 3	0 3	0 0	0 0	0 0	2 1	2 1	2 0	1 0	0 0	2 0	0 0	6 0	2 0	4 0
tig00000650	1601651	C	T	0 0	0 2	0 0	0 0	0 0	0 0	0 1	0 1	0 0	0 0	0 0	2 0	5 0	0 0	0 0	0 0	0 0	1 0	4 0	0 11	0 0	0 1	1 0	3 0	0 2	0 1	4 0	2 0	0 0	6 0	1 2	0 5	0 5	0 0	0 0	0 0	0 4	0 4	0 2	0 3	0 4	0 4	0 2	0 7	0 5	0 4
tig00000650	1601663	T	C	0 0	0 0	0 0	0 0	0 0	0 0	0 0	0 0	0 0	0 0	0 0	0 1	0 4	0 0	0 0	0 0	0 0	0 3	0 3	0 9	0 0	0 0	0 1	0 4	0 0	0 0	0 5	0 2	0 0	0 6	0 2	0 0	0 6	0 0	0 0	0 0	2 2	3 1	2 2	2 2	3 1	2 2	2 0	8 0	0 5	4 0
tig00000650	1601665	C	T	0 0	0 0	0 0	0 0	0 0	0 0	0 0	0 0	0 0	0 0	0 0	0 1	0 4	0 0	0 0	0 0	0 0	0 3	0 3	0 7	0 0	0 0	0 0	0 4	0 0	0 0	0 5	0 2	0 0	0 5	0 2	0 0	0 6	0 0	0 0	0 0	2 2	0 3	2 2	0 2	0 3	2 2	0 2	0 8	2 0	0 3
tig00000650	1601671	AGATC	GGATT	0 0	0 0	0 0	0 0	0 0	0 0	0 0	0 0	0 0	0 0	0 0	0 1	0 2	0 0	0 0	0 0	0 0	0 2	0 4	0 7	0 0	0 0	0 1	0 4	0 0	0 0	0 6	0 3	0 0	0 5	0 2	0 0	0 6	0 0	0 0	0 0	2 1	1 3	2 2	2 2	1 3	2 2	0 1	0 8	3 0	0 3
tig00000650	1601686	G	A	0 0	0 0	0 0	0 0	0 0	0 0	0 0	0 0	0 0	0 0	0 2	0 0	0 1	0 0	0 0	0 0	0 0	0 2	0 3	0 7	0 0	0 0	0 1	0 4	0 0	0 0	0 5	0 2	0 0	0 3	0 2	0 0	0 6	0 0	0 0	0 0	2 0	2 0	3 0	2 0	0 0	2 0	0 0	6 0	2 0	3 0
tig00000650	1601686	GATG	AATA	0 0	0 0	0 0	0 0	0 0	0 0	0 0	0 0	0 0	0 0	0 2	0 0	0 1	0 0	0 0	0 0	0 0	0 2	0 3	0 7	0 0	0 0	0 1	0 4	0 0	0 0	0 5	0 2	0 0	0 3	0 2	0 0	0 6	0 0	0 0	0 0	0 0	0 0	0 0	0 0	2 0	2 0	1 0	2 0	0 0	0 0
tig00000650	1601694	G	A	0 0	0 0	0 0	0 0	0 0	0 0	0 0	0 0	0 0	0 0	2 0	0 0	1 0	0 0	0 0	0 0	0 0	2 0	3 0	0 7	0 0	0 0	1 0	4 0	0 0	0 0	4 0	2 0	0 0	2 0	0 2	0 0	0 6	0 0	0 0	0 0	0 3	0 3	0 3	0 3	0 4	0 3	0 1	0 8	0 5	0 2
tig00000650	1601709	C	A	0 0	0 0	0 0	0 0	0 0	0 0	0 0	0 0	0 0	0 0	0 2	0 0	0 1	0 0	0 0	0 0	0 0	0 2	0 2	0 7	0 0	0 0	0 0	0 4	0 0	0 0	0 4	0 1	0 0	0 2	0 2	0 0	0 6	0 0	0 0	0 0	2 0	1 1	2 1	2 1	1 0	1 0	0 0	0 5	3 0	0 3
tig00000650	1601715	T	G	0 0	0 0	0 0	0 0	0 0	0 0	0 0	0 0	0 0	0 0	0 2	0 0	0 1	0 0	0 0	0 0	0 0	0 2	0 2	0 6	0 0	0 0	0 0	0 4	0 0	0 0	0 3	0 1	0 0	0 2	0 2	0 0	0 6	0 0	0 0	0 0	0 2	2 1	1 2	1 1	1 1	1 0	1 0	5 0	0 3	2 0
tig00000650	1601723	C	T	0 0	0 0	0 0	0 0	0 0	0 0	0 0	0 0	0 0	0 0	2 0	0 0	1 0	0 0	0 0	0 0	0 0	1 0	2 0	0 7	0 0	0 0	0 0	4 0	0 0	0 0	3 0	1 0	0 0	2 0	0 1	0 0	0 6	0 0	0 0	0 0	0 2	0 2	0 3	0 2	1 1	1 0	1 0	1 3	0 2	0 2
tig00000650	1601729	C	T	0 0	0 0	0 0	0 0	0 0	0 0	0 0	0 0	0 0	0 0	0 2	0 0	0 1	0 0	0 0	0 0	0 0	0 1	0 2	0 7	0 0	0 0	0 0	0 4	0 0	0 0	0 2	0 1	0 0	0 1	0 1	0 0	0 6	0 0	0 0	0 0	2 0	0 1	2 1	2 1	1 1	0 1	0 1	0 4	2 0	0 1
tig00000650	1601734	C	T	0 0	0 0	0 0	0 0	0 0	0 0	0 0	0 0	0 0	0 0	0 2	0 0	0 1	0 0	0 0	0 0	0 0	0 1	0 1	0 8	0 0	0 0	0 0	0 3	0 0	0 0	0 2	0 1	0 0	0 1	0 0	0 0	0 7	0 0	0 0	0 0	2 0	1 0	3 0	2 0	1 1	0 1	0 1	3 1	2 0	2 0
tig00000650	1601749	A	G	0 0	0 0	0 0	0 0	0 0	0 0	0 0	0 0	0 0	0 0	0 2	0 0	0 0	0 0	0 0	0 0	0 0	0 1	0 1	0 7	0 0	0 0	0 0	0 1	0 0	0 0	0 1	0 1	0 0	0 0	0 1	0 0	0 6	0 0	0 0	0 0	0 2	0 0	0 2	0 2	0 2	0 1	0 0	0 1	0 2	0 0
tig00000650	1601753	TAG	AAT	0 0	0 0	0 0	0 0	0 0	0 0	0 0	0 0	0 0	0 0	0 0	0 0	0 0	0 0	0 0	0 0	0 0	0 1	0 1	0 7	0 0	0 0	0 0	0 1	0 0	0 0	0 1	0 1	0 0	0 0	0 1	0 0	0 5	0 0	0 0	0 0	2 0	0 0	2 0	2 0	1 1	0 1	0 0	0 1	2 0	0 0
tig00000650	1601755	G	A	0 0	0 0	0 0	0 0	0 0	0 0	0 0	0 0	0 0	0 0	0 0	0 0	0 0	0 0	0 0	0 0	0 0	0 1	0 1	0 7	0 0	0 0	0 0	0 1	0 0	0 0	0 1	0 1	0 0	0 0	0 1	0 0	0 5	0 0	0 0	0 0	0 0	0 0	0 0	0 0	0 1	0 1	0 0	0 1	0 0	0 0
tig00000650	1601769	AAGAAAAAGA	CTTAAG	0 0	0 0	0 0	0 0	0 0	0 0	0 0	0 0	0 0	0 0	0 0	0 0	0 0	0 0	0 0	0 0	0 0	0 0	0 0	0 4	0 0	0 0	0 0	0 0	0 0	0 0	0 0	0 0	0 0	0 0	1 0	0 0	5 0	0 0	0 0	0 0	0 0	0 0	0 0	0 0	0 0	0 0	0 0	0 0	0 0	0 0
tig00000650	1601800	A	G	0 0	0 0	0 0	0 0	0 0	0 0	0 0	0 0	0 0	0 0	0 0	0 0	0 0	0 0	0 0	0 0	0 0	0 0	0 0	0 4	0 0	0 0	0 0	0 0	0 0	0 0	0 0	0 0	0 0	0 0	2 0	0 0	6 0	0 0	0 0	0 0	0 0	0 0	0 0	0 0	0 0	0 0	0 0	0 0	0 0	0 0
tig00000650	1601806	TT	CC	0 0	0 0	0 0	0 0	0 0	0 0	0 0	0 0	0 0	0 0	0 0	0 0	0 0	0 0	0 0	0 0	0 0	0 0	0 0	0 5	0 0	0 0	0 0	0 0	0 0	0 0	0 0	0 0	0 0	0 0	2 0	0 0	4 0	0 0	0 0	0 0	0 0	0 0	0 0	0 0	0 0	0 0	0 0	0 0	0 0	0 0
tig00000650	1601807	T	C	0 0	0 0	0 0	0 0	0 0	0 0	0 0	0 0	0 0	0 0	0 0	0 0	0 0	0 0	0 0	0 0	0 0	0 0	0 0	0 5	0 0	0 0	0 0	0 0	0 0	0 0	0 0	0 0	0 0	0 0	0 0	0 0	2 0	0 0	0 0	0 0	0 0	0 0	0 0	0 0	0 0	0 0	0 0	0 0	0 0	0 0
tig00000650	1601818	GA	AG	0 0	0 0	0 0	0 0	0 0	0 0	0 0	0 0	0 0	0 0	0 0	0 0	0 0	0 0	0 0	0 0	0 0	0 0	0 0	0 5	0 0	0 0	0 0	0 0	0 0	0 0	0 0	0 0	0 0	0 0	2 0	0 0	6 0	0 0	0 0	0 0	0 0	0 0	0 0	0 0	0 0	0 0	0 0	0 0	0 0	0 0
tig00000650	1601819	A	G	0 0	0 0	0 0	0 0	0 0	0 0	0 0	0 0	0 0	0 0	1 0	0 0	2 0	0 0	0 0	0 0	0 0	0 0	2 0	0 5	0 0	0 0	0 0	3 0	0 0	0 0	1 0	1 0	0 0	2 0	0 0	0 0	0 0	0 0	0 0	0 0	0 0	0 0	0 0	0 0	0 0	0 0	0 0	0 0	0 0	0 0
tig00000650	1601837	GA	AG	0 0	0 0	0 0	0 0	0 0	0 0	0 0	0 0	0 0	0 0	0 1	0 0	0 2	0 0	0 0	0 0	0 0	0 0	0 2	0 7	0 0	0 0	0 1	0 3	0 0	0 0	0 1	0 2	0 0	0 2	1 0	0 0	4 0	0 0	0 0	0 0	0 0	0 0	0 0	0 0	0 0	0 0	0 0	0 0	0 0	0 0
tig00000650	1601837	GA	TG	0 0	0 0	0 0	0 0	0 0	0 0	0 0	0 0	0 0	0 0	0 1	0 0	0 2	0 0	0 0	0 0	0 0	0 0	0 2	0 7	0 0	0 0	0 1	0 3	0 0	0 0	0 1	0 2	0 0	0 2	0 0	0 0	0 0	0 0	0 0	0 0	0 0	0 0	0 0	0 0	0 0	0 0	0 0	0 0	0 0	0 0
tig00000650	1601844	T	A	0 0	0 0	0 0	0 0	0 0	0 0	0 0	0 0	0 0	0 0	1 0	0 0	2 0	0 0	0 0	0 0	0 0	0 0	2 0	0 7	0 0	0 0	1 0	3 0	0 0	0 0	1 0	2 0	0 0	2 0	0 0	0 0	0 0	0 0	0 0	0 0	0 0	0 0	0 0	0 0	0 0	0 0	0 0	0 0	0 0	0 0
tig00000650	1601844	T	G	0 0	0 0	0 0	0 0	0 0	0 0	0 0	0 0	0 0	0 0	0 0	0 0	0 0	0 0	0 0	0 0	0 0	0 0	0 0	0 7	0 0	0 0	0 0	0 0	0 0	0 0	0 0	0 0	0 0	0 0	1 0	0 0	4 0	0 0	0 0	0 0	0 0	0 0	0 0	0 0	0 0	0 0	0 0	0 0	0 0	0 0
tig00000650	1601854	A	G	0 0	0 0	0 0	0 0	0 0	0 0	0 0	0 0	0 0	0 0	0 0	0 0	0 0	0 0	0 0	0 0	0 0	0 0	0 0	0 7	0 0	0 0	0 0	0 0	0 0	0 0	0 0	0 0	0 0	0 0	2 0	0 0	4 0	0 0	0 0	0 0	0 0	0 0	0 0	0 0	0 0	0 0	0 0	0 0	0 0	0 0
tig00000650	1601854	A	T	0 0	0 0	0 0	0 0	0 0	0 0	0 0	0 0	0 0	0 0	1 0	0 0	1 0	0 0	0 0	0 0	0 0	0 0	0 0	0 7	0 0	0 0	1 0	2 0	0 0	0 0	0 0	1 0	0 0	2 0	0 0	0 0	0 0	0 0	0 0	0 0	0 0	0 0	0 0	0 0	0 0	0 0	0 0	0 0	0 0	0 0
tig00000650	1601868	AAAAAAATATATTAATTA	TAAAAAAAAATAAAAAATATTAATT	0 0	0 0	0 0	0 0	0 0	0 0	0 0	0 0	0 0	0 0	0 0	0 0	0 0	0 0	0 0	0 0	0 0	0 0	0 0	0 6	0 0	0 0	1 0	1 0	0 0	0 0	0 0	1 0	0 0	2 0	0 0	0 0	0 0	0 0	0 0	0 0	0 0	0 0	0 0	0 0	0 0	0 0	0 0	0 0	0 0	0 0
tig00000650	1601868	AAAAAAATATATTAATTA	TAGAAAAAAAATAAAAAAATATTAATT	0 0	0 0	0 0	0 0	0 0	0 0	0 0	0 0	0 0	0 0	0 0	0 0	0 0	0 0	0 0	0 0	0 0	0 0	0 0	0 6	0 0	0 0	0 0	0 0	0 0	0 0	0 0	0 0	0 0	0 0	1 0	0 0	2 0	0 0	0 0	0 0	0 0	0 0	0 0	0 0	0 0	0 0	0 0	0 0	0 0	0 0
tig00000650	1601908	C	CA	0 3	0 1	0 0	0 4	0 1	0 7	0 5	0 6	0 1	0 3	0 0	0 1	2 0	0 5	0 1	0 5	0 6	0 2	1 6	0 7	0 0	0 2	0 1	2 3	0 0	0 6	2 1	5 2	0 4	1 4	0 8	0 0	0 7	0 0	0 0	0 0	0 0	0 0	0 0	0 0	0 1	0 0	0 0	0 0	0 0	0 0
tig00000650	1601911	A	G	0 3	0 1	0 0	0 4	0 1	0 7	0 5	0 6	0 1	0 3	0 0	0 1	0 0	0 5	0 1	0 5	0 6	0 2	0 6	0 7	0 0	0 2	0 1	0 3	0 0	0 6	0 1	0 2	0 4	0 4	0 8	0 0	0 7	0 0	0 0	0 0	0 0	0 0	0 0	0 0	0 1	0 0	0 0	0 0	0 0	0 0
tig00000650	1601934	C	T	0 0	0 0	0 0	0 2	0 0	0 2	0 1	0 0	0 0	0 2	0 0	0 0	0 6	0 1	0 0	0 0	0 0	0 1	0 2	0 11	0 0	0 2	0 2	0 3	0 1	0 0	0 3	0 5	0 1	0 6	0 6	0 8	0 8	0 2	0 0	0 0	0 0	0 0	2 0	1 3	0 0	0 1	0 0	0 2	1 1	1 1
tig00000650	1601936	A	G	3 0	1 0	0 0	5 2	1 0	8 2	5 1	2 0	1 0	3 2	0 0	1 0	0 6	5 1	1 0	5 0	6 0	2 1	6 2	0 11	0 0	2 2	1 2	4 3	0 1	6 0	1 3	1 5	4 1	0 6	0 6	0 8	0 8	0 2	0 0	0 0	0 0	0 0	0 0	0 3	0 0	0 1	0 0	0 2	0 1	0 1
tig00000650	1601944	C	T	0 3	0 1	0 0	0 7	0 1	0 10	0 5	0 6	0 1	0 5	0 0	0 0	7 0	0 5	0 1	0 5	0 6	1 0	2 6	0 10	0 0	0 2	2 1	3 3	0 1	0 6	3 1	5 1	0 4	3 6	0 6	0 0	0 8	0 0	0 0	0 0	0 0	0 1	0 0	0 2	0 0	0 0	0 0	0 0	0 1	0 4
tig00000650	1601957	C	T	0 3	0 1	0 0	0 7	0 1	0 10	0 6	0 6	0 1	0 5	0 1	0 1	0 9	0 6	0 1	0 5	0 6	0 3	0 8	0 9	0 1	0 3	0 3	0 8	0 1	0 6	0 4	0 7	0 5	0 10	0 5	0 8	0 9	0 2	0 0	0 0	0 0	0 1	2 0	2 4	0 0	0 1	0 0	0 2	0 2	0 4
tig00000650	1601962	C	T	2 1	0 1	0 0	0 7	0 1	8 1	4 1	2 4	0 1	3 2	0 1	1 0	0 10	4 2	1 0	2 3	5 1	2 1	0 8	0 9	0 1	2 1	1 2	0 8	0 0	6 0	1 4	1 8	0 4	0 9	0 5	0 8	0 8	0 2	0 0	0 0	0 0	0 1	0 2	0 6	0 0	0 1	0 0	0 2	0 2	0 4
tig00000650	1601964	A	G	0 3	0 1	0 0	0 7	0 1	0 9	0 4	0 6	0 1	0 5	0 1	0 1	0 9	0 6	0 1	0 5	0 6	0 3	0 8	0 8	0 1	0 3	0 3	0 8	0 0	0 6	0 5	0 9	0 4	0 9	0 5	0 8	0 9	0 2	0 0	0 0	0 0	0 1	0 2	0 6	0 0	0 1	0 0	0 2	0 2	0 4
tig00000650	1601965	T	C	0 3	0 1	0 0	0 7	0 1	0 9	0 4	0 6	0 1	0 5	0 1	0 1	0 9	0 6	0 1	0 5	0 6	0 3	0 8	0 8	0 1	0 3	0 3	0 8	0 0	0 6	0 5	0 9	0 4	0 9	0 4	0 8	0 9	0 2	0 0	0 0	0 0	1 0	0 2	1 5	0 0	0 1	0 0	0 2	1 1	3 1
tig00000650	1601970	AGTGAA	GGTG	0 0	0 0	0 0	0 0	0 0	0 0	0 0	0 0	0 0	0 0	0 0	0 0	0 0	0 0	0 0	0 0	0 0	0 0	0 0	0 7	0 0	0 0	0 0	0 0	0 0	0 0	0 0	0 0	0 0	0 0	1 0	0 0	5 0	0 0	0 0	0 0	0 0	0 0	0 0	0 0	0 0	0 0	0 0	0 0	0 0	0 0
tig00000650	1601972	TGA	T	0 0	0 0	0 0	0 0	0 0	0 0	0 0	0 0	0 0	0 0	1 0	0 0	7 0	0 0	0 0	0 0	0 0	0 0	1 0	0 7	1 0	0 0	2 0	4 0	0 0	0 0	2 0	7 0	0 0	3 0	0 0	0 0	0 0	0 0	0 0	0 0	0 0	0 0	0 0	0 0	0 0	0 0	0 0	0 0	0 0	0 0
tig00000650	1601973	GAA	G	0 0	0 0	0 0	0 0	0 0	1 0	0 0	0 0	0 0	1 0	0 0	0 0	0 0	1 0	0 0	0 0	1 0	0 0	1 0	0 7	0 0	1 0	0 0	0 0	0 0	1 0	0 0	0 0	0 0	0 0	0 0	0 0	4 0	0 0	0 0	0 0	0 0	1 0	0 0	0 0	0 0	1 0	0 0	0 0	0 0	3 0
tig00000650	1601986	TTCTTTTTT	CTCTTTTG	0 0	0 0	0 0	0 0	0 0	0 0	0 0	0 0	0 0	0 0	0 0	0 0	0 0	0 0	0 0	0 0	0 0	0 0	0 0	0 6	0 0	0 0	0 0	0 0	0 0	0 0	0 0	0 0	0 0	0 0	0 1	0 0	0 7	0 0	0 0	0 0	0 0	0 0	0 0	0 0	0 0	0 0	0 0	0 0	0 0	3 0
tig00000650	1601998	A	T	0 0	0 0	0 0	0 0	0 0	0 0	0 0	0 0	0 0	0 0	1 0	1 0	8 0	0 0	0 0	0 0	0 0	0 0	0 0	0 6	1 0	0 0	3 0	3 0	0 0	0 0	3 0	4 0	0 0	3 0	0 1	0 0	0 7	0 0	0 0	0 0	0 0	0 0	0 0	0 0	0 0	0 0	0 0	0 0	0 0	0 0
tig00000650	1602007	G	A	0 0	0 0	0 0	0 0	0 0	0 0	0 0	0 0	0 0	0 0	1 1	0 1	0 7	0 0	0 0	0 0	0 0	0 1	0 0	0 7	0 1	1 0	0 3	0 3	0 0	0 0	1 3	1 3	0 0	0 4	0 3	0 0	0 8	0 0	0 0	0 0	0 0	0 1	1 0	0 2	0 0	1 0	0 0	0 0	0 1	0 3
tig00000650	1602016	G	A	0 0	0 0	0 0	0 0	0 0	0 0	0 0	0 1	0 0	0 0	0 2	0 1	0 7	0 1	0 1	0 0	0 1	0 2	0 0	0 7	0 1	0 3	0 6	0 4	0 0	0 0	0 4	0 9	0 5	0 7	0 4	0 0	0 8	0 0	0 0	0 0	2 0	0 2	3 1	1 1	0 0	3 1	0 0	0 0	2 2	3 3
tig00000650	1602016	G	T	0 0	0 0	0 0	0 0	0 0	0 0	0 0	0 1	0 0	0 0	0 2	1 1	0 7	0 1	0 1	0 0	0 1	0 2	0 0	0 7	0 1	0 3	0 6	0 4	0 0	0 0	0 4	0 9	0 5	0 7	0 4	0 0	0 8	0 0	0 0	0 0	0 0	0 2	0 1	0 1	0 0	0 1	0 0	0 0	0 2	0 3
tig00000650	1602019	G	A	0 1	0 0	0 0	0 0	0 0	1 0	0 0	1 0	0 0	0 0	0 3	0 2	0 6	0 1	0 1	0 0	0 1	0 2	0 0	0 8	0 1	0 3	0 6	3 1	0 0	0 0	0 3	3 6	0 8	0 7	0 5	0 0	0 8	0 0	0 0	0 0	0 2	1 2	1 2	1 2	0 0	0 4	0 0	0 0	2 3	3 3
tig00000650	1602024	TAGAAGAAA	CAGAAGAAG	0 0	0 0	0 0	0 0	0 0	0 1	0 0	0 1	0 0	0 0	0 3	0 1	0 5	0 0	0 1	0 0	0 1	0 2	0 0	0 4	0 1	0 3	0 5	0 4	0 0	0 0	0 3	0 9	0 8	0 6	0 1	0 0	0 0	0 0	0 0	0 0	0 2	0 0	0 4	0 1	0 0	0 3	0 0	0 0	0 2	0 3
tig00000650	1602032	A	G	0 0	0 0	0 0	0 0	0 0	0 1	0 0	0 1	0 0	0 0	0 3	0 1	0 5	0 0	0 1	0 0	0 1	0 2	0 0	0 4	0 1	0 3	0 5	0 4	0 0	0 0	0 3	0 9	0 8	0 6	5 1	0 0	4 0	0 0	0 0	0 0	0 2	0 0	0 4	0 1	0 0	0 3	0 0	0 0	0 2	0 3
tig00000650	1602043	G	A	0 1	0 1	0 0	0 0	0 0	0 0	0 0	0 0	0 0	0 0	1 2	1 1	5 0	0 0	0 1	0 0	0 1	1 1	0 0	0 4	1 0	0 3	1 5	4 0	0 0	0 0	2 1	3 6	0 8	3 3	0 8	0 0	0 8	0 0	0 0	0 0	0 2	0 3	1 3	0 3	0 0	0 3	0 1	0 0	0 5	0 6
tig00000650	1602043	G	T	0 1	0 1	0 0	0 0	0 0	1 0	0 0	1 0	0 0	0 0	0 2	0 1	0 0	1 0	0 1	0 0	0 1	0 1	0 0	0 4	0 0	0 3	0 5	0 0	0 0	0 0	0 1	0 6	0 8	0 3	0 8	0 0	0 8	0 0	0 0	0 0	0 2	0 3	0 3	0 3	0 0	0 3	0 1	0 0	0 5	0 6
tig00000650	1602046	G	A	0 0	0 1	0 0	0 0	0 0	0 1	0 0	0 1	0 0	0 0	0 2	0 2	0 5	0 1	0 1	0 0	0 1	0 2	0 0	0 4	0 1	0 3	0 4	0 4	0 0	0 0	0 3	0 9	0 7	0 6	0 8	0 0	0 8	0 0	0 0	0 0	0 2	0 4	0 3	0 2	0 0	0 3	0 1	0 0	0 4	0 6
tig00000650	1602071	C	T	0 1	0 1	0 0	0 0	0 2	0 1	0 0	0 1	0 0	0 0	0 2	0 2	0 3	0 1	0 1	0 0	0 1	0 1	0 1	0 3	0 0	0 3	1 4	0 2	0 0	0 1	0 2	0 7	0 7	0 6	0 8	0 0	0 7	0 0	0 0	0 0	4 0	0 4	3 1	1 2	0 0	3 0	0 1	0 0	1 4	3 3
tig00000650	1602073	G	A	0 1	0 1	0 0	0 0	0 2	0 1	0 0	0 1	0 0	0 0	0 2	0 1	0 1	0 1	0 1	0 0	0 0	0 1	0 1	0 3	0 0	0 2	0 5	0 2	0 0	0 1	0 1	0 4	0 4	0 6	6 2	0 0	0 7	0 0	0 0	0 0	0 4	0 4	0 4	0 3	0 0	0 3	1 0	0 0	0 6	0 5
tig00000650	1602085	C	T	0 1	0 1	0 0	0 0	0 2	0 1	0 0	0 1	0 0	0 0	0 2	0 1	0 1	0 1	0 1	0 0	0 1	0 1	0 1	0 3	0 0	0 3	0 5	0 2	0 0	0 1	0 1	0 6	0 7	0 5	0 7	0 0	4 2	0 0	0 0	0 0	0 4	0 3	0 2	0 2	0 0	0 3	0 0	0 0	0 5	0 3
tig00000650	1602094	G	A	0 0	0 0	0 0	0 0	0 0	0 0	0 0	0 0	0 0	0 0	0 0	0 0	0 1	0 0	0 0	0 0	0 0	0 1	0 0	0 3	0 0	0 0	0 0	0 1	0 0	0 0	0 0	0 0	0 0	0 1	4 0	0 0	7 0	0 0	0 0	0 0	0 0	0 0	0 0	0 0	0 0	0 0	0 0	0 0	0 0	0 0
tig00000650	1602094	G	T	1 0	1 0	0 0	0 0	0 0	0 0	0 0	0 0	0 0	0 0	2 0	0 0	0 1	0 0	1 0	0 0	0 0	0 1	0 0	0 3	0 0	1 0	4 0	0 1	0 0	1 0	0 0	2 0	2 0	1 1	0 0	0 0	0 0	0 0	0 0	0 0	0 0	0 0	0 0	0 0	0 0	0 0	1 0	0 0	1 0	0 0
tig00000650	1602101	G	A	0 1	0 1	0 0	0 0	0 2	0 0	0 0	0 1	0 0	0 0	0 2	0 1	0 1	0 1	0 1	0 0	0 1	0 1	0 1	0 3	0 0	0 2	0 5	0 1	0 0	0 1	0 0	0 4	0 5	0 2	0 4	0 0	0 7	0 0	0 0	0 0	4 1	0 3	2 1	1 0	0 0	1 0	0 1	0 0	2 3	3 0
tig00000650	1602108	CTCGAATTCA	TTGGGATTCG	0 0	0 0	0 0	0 0	0 0	0 0	0 0	0 0	0 0	0 0	0 0	0 0	0 0	0 0	0 0	0 0	0 0	0 0	0 0	0 2	0 0	0 0	0 0	0 0	0 0	0 0	0 0	0 0	0 0	0 0	1 0	0 0	5 0	0 0	0 0	0 0	0 0	1 0	0 0	0 0	0 0	0 0	0 0	0 0	0 0	0 0
tig00000650	1602143	AG	A	0 0	0 0	0 1	0 0	0 2	0 0	0 0	0 1	0 0	0 0	0 0	0 1	0 0	0 1	0 0	0 0	0 0	0 0	0 0	0 2	0 0	0 0	0 0	0 0	0 1	0 0	0 0	0 0	0 0	0 0	0 0	0 0	0 4	0 0	0 0	0 0	0 2	0 3	0 2	0 1	0 0	0 0	0 0	0 0	0 5	0 3
tig00000650	1602154	T	G	0 0	0 0	0 1	0 0	0 2	0 0	0 0	0 1	0 0	0 0	0 0	0 1	0 0	0 2	0 0	0 0	0 0	0 0	0 0	0 4	0 0	0 0	0 0	0 0	0 1	0 0	0 0	0 0	0 0	0 0	0 1	0 4	0 4	0 0	0 0	0 0	0 3	0 3	0 1	0 1	0 0	0 0	0 1	0 0	0 4	0 3
tig00000650	1602164	TG	CA	0 0	0 0	0 1	0 0	0 2	0 0	0 0	0 1	0 0	0 0	0 0	0 1	0 0	0 2	0 0	0 0	0 0	0 0	0 0	0 6	0 0	0 0	0 0	0 0	0 1	0 0	0 0	0 0	0 0	0 0	1 0	0 2	3 0	0 0	0 0	0 0	0 3	0 2	0 1	0 0	0 0	0 0	0 1	0 0	0 1	0 0
tig00000650	1602165	G	A	0 0	0 0	0 1	0 0	0 2	0 0	0 0	0 1	0 0	0 0	0 0	0 1	0 0	0 2	0 0	0 0	0 0	0 0	0 0	0 6	0 0	0 0	0 0	0 0	0 1	0 0	0 0	0 0	0 0	0 0	0 0	0 2	0 0	0 0	0 0	0 0	0 3	0 2	0 1	0 0	0 0	0 0	0 1	0 0	0 1	0 0
tig00000650	1602174	TA	T	0 0	0 0	0 1	0 0	0 1	0 0	0 0	0 0	0 0	0 0	0 0	0 0	0 0	0 1	0 0	0 0	0 0	0 0	0 0	0 5	0 0	0 0	0 0	0 0	0 1	0 0	0 0	0 0	0 0	0 0	1 0	0 1	3 0	0 0	0 0	0 0	0 2	0 0	0 0	0 0	0 0	0 0	0 0	0 0	0 1	0 0
tig00000650	1602193	A	G	0 0	0 0	0 1	0 0	0 2	0 0	0 0	0 1	0 0	0 0	0 0	0 1	0 0	0 2	0 0	0 0	0 0	0 0	0 0	0 6	0 0	0 0	0 0	0 0	0 1	0 0	0 0	0 0	0 0	0 0	0 3	0 4	0 3	0 0	0 0	0 0	0 3	0 1	0 1	0 0	0 0	0 0	0 0	0 0	0 1	0 0
tig00000650	1602206	T	C	0 0	0 0	1 0	0 0	1 1	0 0	0 0	0 1	0 0	0 0	0 0	0 1	0 0	0 1	0 0	0 0	0 0	0 0	0 0	0 7	0 0	0 0	0 0	0 0	1 0	0 0	0 0	0 0	0 0	0 0	3 0	0 2	2 0	0 0	0 0	0 0	0 0	0 0	0 0	0 0	0 0	0 0	0 0	0 0	0 0	0 0
tig00000650	1602241	A	C	0 0	0 0	0 0	0 0	0 0	0 0	0 0	0 0	0 0	0 0	0 0	0 0	1 0	0 0	0 0	0 0	0 0	0 0	0 0	0 8	0 0	0 0	1 0	1 0	0 0	0 0	1 1	0 0	0 0	0 0	0 0	0 0	1 0	0 0	0 0	0 0	0 0	1 0	0 0	0 0	0 0	0 2	0 0	0 0	0 0	0 2
tig00000650	1602260	CCA	TCG	0 0	0 0	0 0	0 0	0 0	0 0	0 0	0 0	0 0	0 0	0 0	0 0	0 0	0 0	0 0	0 0	0 0	0 0	0 0	0 3	0 0	0 0	0 0	0 1	0 0	0 0	0 1	0 0	0 0	0 0	0 0	0 0	0 0	0 0	0 0	0 0	0 0	0 0	0 3	0 0	0 0	0 2	0 1	0 0	0 0	0 0
tig00000650	1602262	A	G	0 0	0 0	0 0	0 0	0 0	0 0	0 0	0 0	0 0	0 0	1 0	0 0	3 0	0 0	0 0	0 0	0 0	0 0	0 0	0 3	0 0	1 0	1 0	0 1	0 0	0 0	1 1	0 0	0 0	1 0	0 0	0 0	0 0	0 0	0 0	0 0	0 0	2 0	0 3	0 0	0 0	0 2	0 1	0 0	1 0	4 0
tig00000650	1602277	C	T	0 0	0 0	0 0	0 0	0 0	0 1	0 0	0 0	0 1	0 0	0 1	0 0	0 4	0 0	0 0	0 0	0 0	0 1	0 1	0 5	0 0	0 1	0 1	0 1	0 0	0 0	0 2	0 1	0 0	0 3	0 6	0 0	3 2	0 0	0 0	0 0	0 0	0 1	0 3	0 0	0 0	0 1	0 1	0 0	0 1	0 4
tig00000650	1602289	G	A	0 0	0 0	0 0	0 0	0 0	0 1	0 0	0 0	0 1	0 0	0 0	0 0	3 0	0 0	0 0	0 0	0 0	1 0	1 0	0 4	1 0	1 0	1 0	1 0	0 0	0 0	2 0	2 0	0 0	3 0	0 6	0 0	0 5	0 0	0 0	0 0	0 0	0 0	0 0	0 0	0 0	0 0	0 0	0 0	0 0	0 0
tig00000650	1602311	G	A	0 0	0 0	0 0	0 0	0 0	0 0	0 0	0 0	0 1	0 0	0 1	0 0	0 4	0 0	0 0	0 0	0 0	0 1	0 1	0 5	0 1	0 1	0 1	0 1	0 0	0 0	0 2	0 2	0 0	0 4	0 7	0 0	0 5	0 0	0 0	0 0	0 0	0 1	0 3	0 0	0 0	0 1	0 2	0 0	0 0	0 5
tig00000650	1602323	GA	G	0 0	0 0	0 0	0 0	0 0	0 0	0 0	0 0	0 0	0 0	0 0	0 0	0 2	0 0	0 0	0 0	0 0	0 0	0 1	0 4	0 1	1 0	0 0	0 0	0 0	0 0	1 0	4 0	0 0	0 3	0 6	0 0	0 4	0 0	0 0	0 0	0 0	1 1	0 0	0 0	0 0	0 0	1 0	1 0	0 0	0 3
tig00000650	1602344	A	T	0 0	0 0	0 0	0 0	0 0	0 0	0 0	0 0	0 1	0 0	0 1	0 0	0 2	0 0	0 0	0 0	0 0	0 1	0 1	0 7	0 1	0 2	0 1	0 0	0 0	0 0	0 1	0 4	0 0	0 5	0 6	0 0	1 4	0 0	0 0	0 0	0 0	0 1	0 2	0 1	0 0	0 0	2 1	1 0	0 0	1 3
tig00000650	1602351	G	T	0 0	0 0	0 0	0 0	0 0	0 0	0 0	0 0	1 0	0 0	0 1	0 0	0 3	0 0	0 0	0 0	0 0	0 1	0 1	0 7	0 1	0 2	0 1	0 0	0 0	0 0	0 1	0 4	0 0	0 5	0 6	0 0	1 4	0 0	0 0	0 0	0 0	0 1	1 0	0 0	0 0	0 0	3 0	1 0	0 1	1 0
tig00000650	1602361	A	AAT	0 0	0 0	0 0	0 0	0 0	0 0	0 0	0 0	0 1	0 0	0 0	0 0	0 0	0 0	0 0	0 0	0 0	0 0	0 0	0 7	0 0	0 0	0 0	0 0	0 0	0 0	0 0	0 0	0 0	0 0	0 0	0 0	0 1	0 0	0 0	0 0	0 0	0 0	0 0	0 0	0 0	0 0	0 2	0 0	0 0	0 1
tig00000650	1602361	A	AT	0 0	0 0	0 0	0 0	0 0	0 0	0 0	0 0	0 1	0 0	0 0	0 0	0 0	0 0	0 0	0 0	0 0	0 0	0 0	0 7	0 0	0 0	0 0	0 0	0 0	0 0	0 0	0 0	0 0	0 0	0 0	0 0	0 1	0 0	0 0	0 0	0 0	0 0	0 0	0 0	0 0	0 0	0 2	0 0	0 0	0 1
tig00000650	1602361	A	T	0 0	0 0	0 0	0 0	0 0	0 0	0 0	0 0	0 1	0 0	0 0	0 0	2 0	0 0	0 0	0 0	0 0	0 0	1 0	0 7	1 0	0 0	1 0	0 0	0 0	0 0	1 0	5 0	0 0	3 0	2 0	0 0	4 1	0 0	0 0	0 0	0 0	0 0	2 0	0 0	0 0	0 0	1 2	1 0	1 0	0 1
tig00000650	1602371	CAAAGAAAC	AAAT	0 0	0 0	0 0	0 0	0 0	0 0	0 0	0 0	0 0	0 0	0 0	0 0	0 2	0 0	0 0	0 0	0 0	0 0	0 0	0 4	0 1	0 1	0 1	0 0	0 0	0 0	0 0	0 4	0 0	0 3	0 0	0 0	1 0	0 0	0 0	0 0	0 0	0 0	0 0	0 0	0 0	0 0	0 0	0 0	0 0	0 0
tig00000650	1602379	CAAAG	AAAAC	0 0	0 0	0 0	0 0	0 0	0 0	0 0	0 0	0 0	0 0	0 0	0 0	0 2	0 0	0 0	0 0	0 0	0 0	0 0	0 4	0 1	0 1	0 1	0 0	0 0	0 0	0 0	0 4	0 0	0 3	1 0	0 0	2 0	0 0	0 0	0 0	0 0	0 0	0 0	0 0	0 0	0 0	0 0	0 0	0 0	0 0
tig00000650	1602392	A	C	0 0	0 0	0 0	0 0	0 0	0 0	0 0	0 0	0 0	0 0	0 0	0 0	2 0	0 0	0 0	0 0	0 0	0 0	0 0	0 5	1 0	1 0	1 0	0 0	0 0	0 0	0 0	4 0	0 0	3 0	0 0	0 0	0 0	0 0	0 0	0 0	0 0	0 0	0 0	0 0	0 0	0 0	0 2	0 2	0 1	0 0
tig00000650	1602403	G	A	0 0	0 0	0 0	0 0	0 0	0 0	0 0	0 0	0 0	0 0	0 0	0 0	0 0	0 0	0 0	0 0	0 0	0 0	0 0	0 5	0 0	0 0	0 0	0 0	0 0	0 0	0 0	0 0	0 0	0 0	0 0	0 0	0 0	0 0	0 0	2 0	0 0	0 0	0 0	0 0	0 0	0 0	0 0	0 0	0 0	0 0
tig00000650	1602407	C	T	0 1	0 0	0 0	0 0	0 1	0 0	0 0	0 0	0 0	0 0	0 0	0 0	0 2	0 0	0 0	0 0	0 1	0 0	0 0	0 6	0 1	0 1	0 0	0 0	0 1	0 0	0 0	0 2	0 0	0 0	0 5	0 0	0 3	0 0	0 0	0 2	0 0	0 0	0 5	0 0	3 0	0 0	0 4	0 5	2 0	0 4
tig00000650	1602416	C	T	0 1	0 0	0 0	0 0	0 1	0 0	0 0	0 0	0 0	0 0	0 0	0 0	1 2	0 0	0 0	0 0	0 1	0 0	0 0	0 6	1 0	0 1	0 0	0 3	0 1	0 0	0 0	0 2	0 0	0 0	0 5	0 0	0 3	0 0	0 0	2 0	0 0	0 0	7 0	0 0	0 3	0 0	5 0	5 0	0 3	4 0
tig00000650	1602420	A	G	1 0	0 0	0 0	0 0	0 1	0 0	0 0	0 0	0 0	0 0	0 0	0 0	1 2	0 0	0 0	0 0	0 1	0 0	0 0	0 7	1 0	1 0	0 0	0 3	0 1	0 0	0 0	2 1	0 0	0 0	5 0	0 0	2 2	0 0	0 0	0 2	0 0	0 0	0 7	0 0	0 3	0 0	0 5	0 5	0 3	0 4
tig00000650	1602421	T	C	0 1	0 0	0 0	0 0	0 1	0 0	0 0	0 0	0 0	0 0	0 0	0 0	0 3	0 0	0 0	0 0	0 1	0 0	0 0	0 6	0 1	0 1	0 0	0 3	0 1	0 0	0 0	0 4	0 0	0 0	0 4	0 0	0 4	0 0	0 0	0 2	0 0	0 0	0 6	0 0	0 3	0 0	0 5	0 5	0 3	0 4
tig00000650	1602427	A	G	0 0	0 0	0 0	0 0	1 0	0 0	0 0	0 0	0 0	0 0	0 0	0 0	1 1	0 0	0 0	0 0	0 0	0 0	0 0	0 6	0 0	0 0	0 0	2 1	0 0	0 0	0 0	2 0	0 0	0 0	4 0	0 0	2 0	0 0	0 0	0 0	0 0	0 0	0 0	0 0	0 3	0 0	0 0	0 0	0 3	0 0
tig00000650	1602427	ACACTG	GCACTA	0 0	0 0	0 0	0 0	0 0	0 0	0 0	0 0	0 0	0 0	0 0	0 0	0 1	0 0	0 0	0 0	0 0	0 0	0 0	0 6	0 0	0 0	0 0	0 1	0 0	0 0	0 0	0 0	0 0	0 0	0 0	0 0	2 0	0 0	0 0	2 0	0 0	0 0	6 0	0 0	0 3	0 0	0 0	5 0	0 3	3 0
tig00000650	1602437	C	G	0 0	0 0	0 0	0 0	0 0	0 0	0 0	0 0	0 0	0 0	1 0	0 0	1 1	0 0	0 0	0 0	0 0	0 0	0 0	0 6	0 1	0 0	0 0	2 0	0 0	0 0	0 0	2 2	0 0	0 0	0 5	0 0	0 2	0 0	0 0	2 0	0 0	0 0	5 0	0 0	0 0	0 0	3 0	4 0	0 0	2 0
tig00000650	1602450	A	G	1 0	0 0	0 0	0 0	0 1	0 0	0 0	0 0	0 0	0 0	0 1	0 1	0 2	0 0	0 0	0 0	0 1	0 0	0 0	0 6	0 1	0 0	0 0	1 3	0 1	0 0	0 0	0 5	0 0	0 0	0 8	0 0	0 5	0 0	0 0	0 3	0 1	0 0	0 7	1 1	3 0	0 0	0 5	0 4	3 1	0 4
tig00000650	1602460	GA	G	0 1	0 0	0 0	0 0	0 0	0 0	0 0	0 0	0 1	0 0	0 0	0 0	0 0	0 0	0 0	0 0	0 0	0 0	0 0	0 6	0 0	0 0	0 0	0 0	0 0	0 0	0 0	0 0	0 0	0 0	4 0	0 0	2 0	0 0	0 0	0 0	0 0	0 0	0 0	0 0	2 0	0 0	0 0	0 0	3 0	0 0
tig00000650	1602485	C	T	0 3	0 1	0 2	0 4	0 2	0 5	0 0	0 0	0 2	0 2	0 1	0 2	0 1	0 2	0 1	0 1	0 3	0 0	0 1	0 7	0 1	0 1	0 0	0 6	0 6	0 2	0 0	0 3	0 1	0 0	0 5	0 3	0 4	0 0	0 0	2 3	0 2	0 0	0 8	0 3	0 4	0 0	0 4	0 6	0 8	0 6
tig00000650	1602486	G	A	0 3	0 1	0 2	0 4	0 2	0 5	0 0	0 0	0 2	0 2	0 1	0 2	0 1	0 2	0 1	0 1	0 2	0 0	0 1	0 7	0 1	0 1	0 0	0 3	0 5	0 2	0 0	0 3	0 1	0 0	0 5	0 3	0 4	0 0	0 0	3 2	1 1	0 0	1 7	0 2	0 3	0 0	0 4	2 4	0 5	1 3
tig00000650	1602486	GG	AA	0 3	0 1	0 2	0 4	0 2	0 5	0 0	0 0	0 2	0 2	0 1	0 2	0 1	0 2	0 1	0 1	0 2	0 0	0 1	0 7	0 1	0 1	0 0	0 3	0 5	0 2	0 0	0 3	0 1	0 0	0 5	0 3	0 4	0 0	0 0	0 2	0 1	0 0	0 7	0 2	0 3	0 0	0 4	0 4	3 5	0 3
tig00000650	1602525	A	G	0 0	0 0	0 0	0 0	0 0	0 0	0 0	0 0	0 0	0 0	0 0	0 0	0 0	0 0	0 0	0 0	0 0	0 0	0 0	0 5	0 0	0 0	0 0	0 0	0 0	0 0	0 0	0 0	0 0	0 0	0 1	0 1	1 0	0 0	0 0	4 0	0 0	0 0	0 0	0 0	2 0	0 0	0 0	0 0	2 1	0 0
tig00000650	1602533	C	G	0 2	0 1	0 2	0 4	0 1	0 5	0 0	0 0	0 1	0 2	0 0	0 2	0 0	0 2	0 1	0 1	0 2	0 0	0 1	0 9	0 1	0 1	0 0	0 4	0 5	0 2	0 0	0 3	0 1	0 0	0 4	0 3	0 3	0 0	0 0	0 6	0 2	0 0	3 2	0 2	0 2	0 0	3 0	1 3	0 8	2 1
tig00000650	1602543	T	C	0 2	0 1	0 2	0 4	0 1	0 5	0 0	0 0	0 1	0 2	0 0	0 1	0 0	0 2	0 1	0 1	0 2	0 0	0 1	0 9	0 1	0 1	0 0	0 3	0 5	0 2	0 0	0 2	0 1	0 0	0 4	0 2	0 3	0 0	0 0	0 7	0 2	0 0	0 4	0 2	0 1	0 0	0 2	0 5	0 5	0 3
tig00000650	1602546	G	A	0 2	0 1	0 2	0 4	0 1	0 5	0 0	0 0	0 1	0 2	0 0	0 1	0 0	0 2	0 1	0 1	0 2	0 0	0 1	0 9	0 1	0 1	0 0	0 2	0 5	0 2	0 0	0 2	0 1	0 0	0 4	0 2	0 3	0 0	0 0	0 7	0 2	0 0	0 4	0 3	0 1	0 0	0 2	0 5	0 5	2 1
tig00000650	1602559	AA	GG	0 0	0 0	0 0	0 0	0 0	0 0	0 0	0 0	0 0	0 0	0 0	0 0	0 0	0 0	0 0	0 0	0 0	0 0	0 0	0 8	0 0	0 0	0 0	0 0	0 0	0 0	0 0	0 0	0 0	0 0	0 0	0 0	0 0	0 0	0 0	0 0	0 0	0 0	0 0	0 0	0 0	0 0	0 0	0 0	0 0	0 0
tig00000650	1602564	A	T	0 2	0 1	0 2	0 3	0 1	0 4	0 0	0 0	0 1	0 2	0 0	0 1	0 0	0 2	0 1	0 1	0 2	0 0	0 1	0 8	0 1	0 1	0 0	0 1	0 4	0 2	0 0	0 2	0 1	0 0	0 5	0 0	0 3	0 0	0 0	0 7	2 0	0 0	2 0	2 2	1 0	0 0	0 1	2 2	4 1	1 2
tig00000650	1602566	C	T	0 2	0 1	0 1	0 3	0 1	0 4	0 0	0 0	0 1	0 2	0 0	0 1	0 0	0 2	0 1	0 1	0 2	0 0	0 1	0 8	0 1	0 1	0 0	0 1	0 4	0 2	0 0	0 2	0 1	0 0	0 5	0 0	0 3	0 0	0 0	0 7	0 2	0 0	0 2	0 4	0 1	0 0	0 1	0 4	0 4	0 1
tig00000650	1602574	CTTGGG	TTTTGA	0 0	0 0	0 0	0 0	0 0	0 0	0 0	0 0	0 0	0 0	0 0	0 0	0 0	0 0	0 0	0 1	0 0	0 0	0 0	0 9	0 0	0 0	0 0	0 0	0 1	0 0	0 0	0 2	0 1	0 0	0 5	0 0	0 2	0 0	0 0	0 0	1 0	0 0	1 0	2 2	1 0	0 0	0 0	0 3	2 0	0 2
tig00000650	1602579	G	C	0 0	0 0	0 0	0 0	0 0	0 0	0 0	0 0	0 0	0 0	0 0	0 0	0 0	0 0	0 0	0 1	0 0	0 0	0 0	0 9	0 0	0 0	0 0	0 0	0 1	0 0	0 0	0 2	0 1	0 0	0 5	0 0	0 2	0 0	0 0	6 0	0 0	0 0	0 0	0 2	0 0	0 0	0 0	0 3	0 0	0 2
tig00000650	1602586	AGTAACG	TACAACA	0 0	0 0	0 0	0 0	0 0	0 0	0 0	0 0	0 0	0 0	0 0	0 0	0 0	0 0	0 0	0 0	0 0	0 0	0 0	0 9	0 0	0 0	0 0	0 0	0 0	0 0	0 0	0 0	0 0	0 0	4 0	0 0	2 0	0 0	0 0	0 0	0 0	0 0	0 0	0 0	0 0	0 0	0 0	0 0	0 0	0 0
tig00000650	1602598	C	T	0 0	0 0	0 0	0 0	0 0	0 0	0 0	0 0	0 0	0 0	0 0	0 0	0 0	0 0	0 0	0 0	0 0	0 0	0 0	0 9	0 0	0 0	0 0	0 0	0 0	0 0	0 0	0 2	0 0	0 0	0 4	0 0	1 2	0 0	0 0	0 6	0 1	0 0	0 1	0 4	0 2	0 0	0 0	0 3	0 2	0 0
tig00000650	1602602	A	G	0 0	0 0	0 0	0 0	0 0	0 0	0 0	0 0	0 0	0 0	0 0	0 0	0 0	0 0	0 0	0 0	0 0	0 0	0 0	0 8	0 0	0 0	0 0	0 0	0 0	0 0	0 0	0 1	0 0	0 0	0 4	0 0	0 3	0 0	0 0	0 6	0 1	0 0	0 1	0 4	0 2	0 0	0 0	0 3	0 2	0 0
tig00000650	1602603	G	A	0 0	0 0	0 0	0 0	0 0	0 0	0 0	0 0	0 0	0 0	0 0	0 0	0 0	0 0	0 0	0 0	0 0	0 0	0 0	0 8	0 0	0 0	0 0	0 0	0 0	0 0	0 0	0 1	0 0	0 0	0 4	0 0	0 3	0 0	0 0	0 6	1 0	0 0	1 0	2 2	1 1	0 0	0 0	0 3	2 0	0 0
tig00000650	1602628	T	A	0 0	0 0	0 0	0 0	0 0	0 0	0 0	0 0	0 0	0 0	1 0	0 0	0 0	0 0	0 0	0 0	0 0	2 0	0 0	0 7	0 0	0 0	1 0	1 0	0 0	0 0	3 0	2 0	0 0	0 0	1 0	0 0	2 0	0 0	0 0	6 0	0 0	0 0	0 0	2 0	1 0	0 0	0 0	2 0	1 0	0 0
tig00000650	1602628	TATAT	AATAA	0 0	0 0	0 0	0 0	0 0	0 0	0 0	0 0	0 0	0 0	0 0	0 0	0 0	0 0	0 0	0 0	0 0	0 0	0 0	0 7	0 0	0 0	0 0	0 0	0 0	0 0	0 0	0 0	0 0	0 0	0 0	0 0	0 0	0 0	0 0	0 0	1 0	0 0	1 0	0 0	0 0	0 0	0 0	0 0	2 0	0 0
tig00000650	1602641	C	T	0 0	0 0	0 0	0 0	0 0	0 0	0 0	0 0	0 0	0 0	0 2	0 1	0 1	0 0	0 0	0 0	0 0	0 2	0 1	0 7	0 0	0 1	0 1	0 3	0 0	0 0	0 5	0 8	0 0	0 0	0 1	0 0	0 3	0 0	0 0	0 6	0 1	0 0	0 1	2 0	0 1	0 0	0 0	4 0	0 3	0 0
tig00000650	1602644	GACTC	AACTT	0 0	0 0	0 0	0 0	0 0	0 0	0 0	0 0	0 0	0 0	0 2	0 1	0 1	0 0	0 0	0 0	0 0	0 2	0 1	0 6	0 0	0 1	0 1	0 4	0 0	0 0	0 6	0 9	0 0	0 0	0 0	0 0	0 1	0 0	0 0	0 6	0 1	0 0	0 1	0 2	0 1	0 0	0 0	0 4	0 3	0 0
tig00000650	1602648	C	T	0 0	0 0	0 0	0 0	0 0	0 0	0 0	0 0	0 0	0 0	0 2	0 1	0 1	0 0	0 0	0 0	0 0	0 2	0 1	0 6	0 0	0 1	0 1	0 4	0 0	0 0	0 6	0 9	0 0	0 0	1 0	0 0	2 1	0 0	0 0	0 6	0 1	0 0	0 1	0 2	0 1	0 0	0 0	0 4	0 3	0 0
tig00000650	1602661	G	A	0 0	0 0	0 0	0 0	0 0	0 0	0 0	0 0	0 0	0 0	0 2	0 2	0 1	0 0	0 0	0 0	0 0	0 2	0 1	0 5	0 0	0 1	0 2	0 7	0 0	0 0	0 6	0 12	0 0	0 0	0 2	0 0	0 4	0 0	0 0	0 6	0 0	0 0	0 0	0 2	0 1	0 0	0 0	0 4	0 1	0 0
tig00000650	1602665	G	A	0 0	0 0	0 0	0 0	0 0	0 0	0 0	0 0	0 0	0 0	0 2	0 2	0 1	0 0	0 0	0 0	0 0	0 2	0 1	0 5	0 0	0 1	0 2	0 7	0 0	0 0	0 6	0 12	0 0	0 0	2 0	0 0	3 1	0 0	0 0	0 6	0 0	0 0	0 0	0 2	0 1	0 0	0 0	0 4	0 0	0 0
tig00000650	1602668	T	C	0 0	0 0	0 0	0 0	0 0	0 0	0 0	0 0	0 0	0 0	0 2	0 2	0 1	0 0	0 0	0 0	0 0	0 2	0 1	0 5	0 0	0 1	0 2	0 7	0 0	0 0	0 6	0 12	0 0	0 0	0 2	0 0	0 4	0 0	0 0	0 6	0 0	0 0	0 0	0 2	0 1	0 0	0 0	0 4	0 1	0 0
tig00000650	1602670	C	T	0 0	0 0	0 0	0 0	0 0	0 0	0 0	0 0	0 0	0 0	0 2	0 2	0 1	0 0	0 0	0 0	0 0	0 2	0 1	0 6	0 0	0 1	0 2	0 7	0 0	0 0	0 6	1 11	0 0	0 0	0 2	0 0	0 3	0 0	0 0	0 6	0 0	0 0	0 0	2 0	0 1	0 0	0 0	4 0	0 1	0 0
tig00000650	1602671	A	G	0 0	0 0	0 0	0 0	0 0	0 0	0 0	0 0	0 0	0 0	2 0	2 0	1 0	0 0	0 0	0 0	0 0	2 0	1 0	0 7	0 0	1 0	2 0	7 0	0 0	0 0	6 0	12 0	0 0	0 0	0 2	0 0	0 4	0 0	0 0	0 6	0 0	0 0	0 0	0 2	0 1	0 0	0 0	0 4	0 1	0 0
tig00000650	1602673	CATCAAAT	TATTAAAC	0 0	0 0	0 0	0 0	0 0	0 0	0 0	0 0	0 0	0 0	0 0	0 0	0 0	0 0	0 0	0 0	0 0	0 0	0 0	0 7	0 0	0 0	0 0	0 0	0 0	0 0	0 0	0 0	0 0	0 0	0 0	0 0	0 0	0 0	0 0	0 0	0 0	0 0	0 0	0 0	0 0	0 0	0 0	0 0	0 0	0 0
tig00000650	1602675	TCAAAT	CCAAAC	0 0	0 0	0 0	0 0	0 0	0 0	0 0	0 0	0 0	0 0	0 0	0 0	0 0	0 0	0 0	0 0	0 0	0 0	0 0	0 7	0 0	0 0	0 0	0 0	0 0	0 0	0 0	0 0	0 0	0 0	0 0	0 0	0 0	0 0	0 0	0 0	0 0	0 0	0 0	2 0	0 0	0 0	0 0	1 0	0 0	0 0
tig00000650	1602676	CAAAT	TAAAC	0 0	0 0	0 0	0 0	0 0	0 0	0 0	0 0	0 0	0 0	0 0	0 0	0 0	0 0	0 0	0 0	0 0	0 0	0 0	0 7	0 0	0 0	0 0	0 0	0 0	0 0	0 0	0 0	0 0	0 0	0 0	0 0	0 0	0 0	0 0	6 0	0 0	0 0	0 0	0 0	0 0	0 0	0 0	0 0	0 0	0 0
tig00000650	1602676	CAAAT	TAAAG	0 0	0 0	0 0	0 0	0 0	0 0	0 0	0 0	0 0	0 0	0 0	0 0	0 0	0 0	0 0	0 0	0 0	0 0	0 0	0 7	0 0	0 0	0 0	0 0	0 0	0 0	0 0	0 0	0 0	0 0	0 0	0 0	0 0	0 0	0 0	0 0	0 0	0 0	0 0	0 0	0 0	0 0	0 0	0 0	0 0	0 0
tig00000650	1602680	T	C	0 0	0 0	0 0	0 0	0 0	0 0	0 0	0 0	0 0	0 0	2 0	1 0	0 0	0 0	0 0	0 0	0 0	2 0	1 0	0 7	0 0	1 0	2 0	7 0	0 0	0 0	6 0	10 0	0 0	0 0	1 0	0 0	1 0	0 0	0 0	0 0	0 0	0 0	0 0	0 0	1 0	0 0	0 0	0 0	1 0	0 0
tig00000650	1602685	G	T	0 0	0 0	0 0	0 0	0 0	0 0	0 0	0 0	0 0	0 0	0 2	0 2	0 1	0 0	0 0	0 0	0 0	0 2	0 1	0 9	0 0	0 1	0 2	0 7	0 0	0 0	0 6	0 12	0 0	0 0	0 2	0 0	0 3	0 0	0 0	0 5	0 0	0 0	0 0	2 0	0 1	0 0	0 0	3 0	0 1	0 0
tig00000650	1602688	C	T	0 0	0 0	0 0	0 0	0 0	0 0	0 0	0 0	0 0	0 0	2 0	2 0	1 0	0 0	0 0	0 0	0 0	2 0	1 0	0 9	0 0	1 0	2 0	7 0	0 0	0 0	6 0	12 0	0 0	0 0	2 0	0 0	2 1	0 0	0 0	0 7	0 0	0 0	0 0	0 2	0 1	0 0	0 0	0 1	0 1	0 0
tig00000650	1602692	G	A	0 0	0 0	0 0	0 0	0 0	0 0	0 0	0 0	0 0	0 0	0 2	0 2	0 1	0 0	0 0	0 0	0 0	0 2	0 1	0 11	0 0	0 1	0 2	0 7	0 0	0 0	0 6	0 12	0 0	0 0	0 2	0 0	0 3	0 0	0 0	0 7	0 0	0 0	0 0	2 0	0 1	0 0	0 0	2 0	0 1	0 0
tig00000650	1602703	T	TGA	0 0	0 0	0 0	0 0	0 0	0 0	0 0	0 0	0 0	0 0	2 0	1 0	0 0	0 0	0 0	0 0	0 0	2 0	1 0	0 0	0 0	1 0	2 0	7 0	0 0	0 0	5 0	8 0	0 0	0 0	0 0	0 0	0 0	0 0	0 0	0 0	0 0	0 0	0 0	0 0	0 0	0 0	0 0	0 0	0 0	0 0
tig00000650	1602703	T	TGG	0 0	0 0	0 0	0 0	0 0	0 0	0 0	0 0	0 0	0 0	0 0	0 0	0 0	0 0	0 0	0 0	0 0	0 0	0 0	10 0	0 0	0 0	0 0	0 0	0 0	0 0	0 0	0 0	0 0	0 0	0 0	0 0	0 0	0 0	0 0	5 0	0 0	0 0	0 0	0 0	0 0	0 0	0 0	0 0	1 0	0 0
tig00000650	1602704	CTGC	GACTGT	0 0	0 0	0 0	0 0	0 0	0 0	0 0	0 0	0 0	0 0	0 0	0 0	0 0	0 0	0 0	0 0	0 0	0 0	0 0	0 0	0 0	0 0	0 0	0 0	0 0	0 0	0 0	0 0	0 0	0 0	1 0	0 0	2 0	0 0	0 0	0 0	0 0	0 0	0 0	0 0	0 0	0 0	0 0	0 0	0 0	0 0
tig00000650	1602704	CTGC	GGCTGG	0 0	0 0	0 0	0 0	0 0	0 0	0 0	0 0	0 0	0 0	0 0	0 0	0 0	0 0	0 0	0 0	0 0	0 0	0 0	0 0	0 0	0 0	0 0	0 0	0 0	0 0	0 0	0 0	0 0	0 0	0 0	0 0	0 0	0 0	0 0	0 0	0 0	0 0	0 0	0 0	0 0	0 0	0 0	0 0	0 0	0 0
tig00000650	1602718	C	T	0 0	0 0	0 0	0 0	0 0	0 1	0 0	0 0	0 0	0 0	0 1	0 0	0 0	0 0	0 0	0 0	0 0	0 0	0 1	0 12	0 0	0 0	0 0	0 3	0 0	0 0	0 0	0 9	0 0	0 0	0 2	0 0	0 2	0 0	0 0	0 5	0 0	0 0	0 0	0 0	0 0	0 0	0 0	0 1	1 0	0 0
tig00000650	1602754	GAAAAAAACAAAG	AAACC	0 0	0 0	0 0	0 0	0 0	0 0	0 0	0 0	0 0	0 0	0 0	0 0	0 0	0 0	0 0	0 0	0 0	0 0	0 0	0 15	0 0	0 0	0 0	0 0	0 0	0 0	0 0	0 0	0 0	0 0	0 0	0 0	0 0	0 0	0 0	5 0	0 0	0 0	0 0	0 0	0 0	0 0	0 0	0 0	0 0	0 0
tig00000650	1602754	GAAAAAAACAAAGAA	AAACC	0 0	0 0	0 0	0 0	0 0	0 0	0 0	0 0	0 0	0 0	0 0	0 0	0 0	0 0	0 0	0 0	0 0	0 0	0 0	0 15	0 0	0 0	0 0	0 0	0 0	0 0	0 0	0 0	0 0	0 0	0 0	0 0	0 0	0 0	0 0	0 0	0 0	0 0	0 0	0 0	0 0	0 0	0 0	0 0	0 0	0 0
tig00000650	1602762	C	AAT	0 0	0 0	0 0	0 0	0 0	0 0	0 0	0 0	0 0	0 0	0 0	0 0	0 0	0 0	0 0	0 0	0 0	0 0	0 0	0 15	0 0	0 0	0 0	0 0	0 0	0 0	0 0	0 0	0 0	0 0	4 0	0 0	3 0	0 0	0 0	0 0	0 0	0 0	0 0	0 0	0 0	0 0	0 0	0 0	0 0	0 0
tig00000650	1602762	C	AT	0 0	0 0	0 0	0 0	0 0	0 0	0 0	0 0	0 0	0 0	0 0	0 0	0 0	0 0	0 0	0 0	0 0	0 0	0 0	0 15	0 0	0 0	0 0	0 0	0 0	0 0	0 0	0 0	0 0	0 0	0 0	0 0	0 0	0 0	0 0	0 0	0 0	0 0	0 0	0 0	0 0	0 0	0 0	0 0	0 0	0 0
tig00000650	1602780	G	A	0 0	0 0	0 0	0 0	0 0	0 0	0 0	0 0	0 0	0 0	0 0	0 0	0 0	0 0	0 0	0 0	0 0	0 1	0 0	0 17	0 0	0 0	0 0	0 0	0 0	0 0	0 0	0 0	0 0	0 0	0 4	0 0	0 5	0 0	0 0	0 6	0 0	0 0	0 0	0 0	0 0	0 0	0 0	0 0	0 0	0 0
tig00000650	1602797	G	A	0 0	0 0	0 0	0 0	0 0	0 1	0 0	0 0	0 0	0 0	0 0	0 0	0 0	0 0	0 0	0 0	0 0	0 1	0 0	0 16	0 0	0 0	0 0	0 0	0 0	0 0	0 0	0 0	0 0	0 0	0 4	0 0	0 6	0 0	0 0	5 0	0 0	0 0	0 0	0 0	0 0	0 0	0 0	0 0	0 0	0 0
tig00000650	1602797	GAAG	AAAA	0 0	0 0	0 0	0 0	0 0	0 1	0 0	0 0	0 0	0 0	0 0	0 0	0 0	0 0	0 0	0 0	0 0	0 1	0 0	0 16	0 0	0 0	0 0	0 0	0 0	0 0	0 0	0 0	0 0	0 0	0 4	0 0	0 6	0 0	0 0	0 0	0 0	0 0	0 0	0 0	0 0	0 0	0 0	0 0	0 0	0 0
tig00000650	1602806	GA	G	0 0	0 0	0 0	0 0	0 0	0 0	0 0	0 0	0 0	0 0	0 0	0 0	0 0	0 0	0 0	0 0	0 0	0 1	0 0	0 12	0 0	0 0	0 0	0 0	0 0	0 0	0 0	0 0	0 0	0 0	0 4	0 0	0 5	0 0	0 0	4 0	0 0	0 0	0 0	0 0	0 0	0 0	0 0	0 0	0 0	0 0
tig00000650	1602806	G	GA	0 0	0 0	0 0	0 0	0 0	0 0	0 0	0 0	0 0	0 0	0 0	0 0	0 0	0 0	0 0	0 0	0 0	0 1	0 0	0 12	0 0	0 0	0 0	0 0	0 0	0 0	0 0	0 0	0 0	0 0	0 4	0 0	0 5	0 0	0 0	0 0	0 0	0 0	0 0	0 0	0 0	0 0	0 0	0 0	0 0	0 0
tig00000650	1602815	C	T	0 0	0 0	0 0	0 0	0 0	0 0	0 0	0 0	0 0	0 0	0 0	0 0	0 0	0 0	0 0	0 0	0 0	0 1	0 0	0 12	0 0	0 0	0 0	0 0	0 0	0 0	0 0	0 0	0 0	0 0	0 4	0 0	0 5	0 0	0 0	0 0	0 0	0 0	0 0	0 0	0 0	0 0	0 0	0 0	0 0	0 0
tig00000650	1602817	G	A	0 0	0 0	0 0	0 0	0 0	0 0	0 0	0 0	0 0	0 0	0 0	0 0	0 0	0 0	0 0	0 0	0 0	0 1	0 0	0 13	0 0	0 0	0 0	0 0	0 0	0 0	0 0	0 0	0 0	0 0	0 4	0 0	0 6	0 0	0 0	0 4	0 0	0 0	0 0	0 0	0 0	0 0	0 0	0 0	0 0	0 0
tig00000650	1602824	C	T	0 0	0 0	0 0	0 0	0 0	0 0	0 0	0 0	0 0	0 0	0 0	0 0	0 0	0 0	0 0	0 0	0 0	0 1	0 0	0 13	0 0	0 0	0 0	0 0	0 0	0 0	0 0	0 0	0 0	0 0	4 0	0 0	4 2	0 0	0 0	0 4	0 0	0 0	0 0	0 0	0 0	0 0	0 0	0 0	0 0	0 0
tig00000650	1602826	G	A	0 0	0 0	0 0	0 0	0 0	0 0	0 0	0 0	0 0	0 0	0 0	0 0	0 0	0 0	0 0	0 0	0 0	0 1	0 0	0 13	0 0	0 0	0 0	0 0	0 0	0 0	0 0	0 0	0 0	0 0	0 4	0 0	0 4	0 0	0 0	0 4	0 0	0 0	0 0	0 0	0 0	0 0	0 0	0 0	0 0	0 0
tig00000650	1602834	C	T	0 0	0 0	0 0	0 0	0 0	0 0	0 0	0 0	0 0	0 0	0 0	0 0	0 0	0 0	0 0	0 0	0 0	0 0	0 0	0 13	0 0	0 0	0 0	0 0	0 0	0 0	0 0	0 0	0 0	0 0	0 0	0 0	0 0	0 0	0 0	0 0	0 0	0 0	0 0	0 0	0 0	0 1	0 0	0 0	0 0	0 0
tig00000650	1602834	CCA	TCG	0 0	0 0	0 0	0 0	0 0	0 0	0 0	0 0	0 0	0 0	0 0	0 0	0 0	0 0	0 0	0 0	0 0	0 0	0 0	0 13	0 0	0 0	0 0	0 0	0 0	0 0	0 0	0 0	0 0	0 0	3 0	0 0	4 0	0 0	0 0	0 0	0 0	0 0	0 0	0 0	0 0	0 1	0 0	0 0	0 0	0 0
tig00000650	1602834	CC	TT	0 0	0 0	0 0	0 0	0 0	0 0	0 0	0 0	0 0	0 0	0 0	0 0	0 0	0 0	0 0	0 0	0 0	0 0	0 0	0 13	0 0	0 0	0 0	0 0	0 0	0 0	0 0	0 0	0 0	0 0	0 0	0 0	0 0	0 0	0 0	0 0	0 0	0 0	0 0	0 0	0 0	0 1	0 0	0 0	0 0	0 0
tig00000650	1602835	C	T	0 0	0 0	0 0	0 0	0 0	0 0	0 0	0 0	0 0	0 0	0 0	0 0	0 0	0 0	0 0	0 0	0 0	0 0	0 0	0 13	0 0	0 0	0 0	0 0	0 0	0 0	0 0	0 0	0 0	0 0	0 0	0 0	0 0	0 0	0 0	4 0	0 0	0 0	0 0	0 0	0 0	0 1	0 0	0 0	0 0	0 0
tig00000650	1602841	A	G	0 0	0 0	0 0	0 0	0 0	0 0	0 0	0 0	0 0	0 0	0 0	0 0	0 0	0 0	0 0	0 0	0 0	0 1	0 0	0 13	0 1	0 0	0 1	0 0	0 0	0 0	0 0	0 0	0 0	0 0	0 3	0 0	0 6	0 0	0 0	4 0	0 0	0 0	0 0	0 0	0 0	0 1	0 0	0 0	0 0	0 0
tig00000650	1602843	TCTAGGTTAA	ACTGGGTCAC	0 0	0 0	0 0	0 0	0 0	0 0	0 0	0 0	0 0	0 0	0 0	0 0	0 0	0 0	0 0	0 0	0 0	0 0	0 0	0 13	0 0	0 0	0 0	0 0	0 0	0 0	0 0	0 0	0 0	0 0	0 0	0 0	0 0	0 0	0 0	0 0	0 0	0 0	0 0	0 0	0 0	0 1	0 0	0 0	0 0	0 0
tig00000650	1602843	TCTAGGTTAA	ACTGGGTTAC	0 0	0 0	0 0	0 0	0 0	0 0	0 0	0 0	0 0	0 0	0 0	0 0	0 0	0 0	0 0	0 0	0 0	0 0	0 0	0 13	0 0	0 0	0 0	0 0	0 0	0 0	0 0	0 0	0 0	0 0	0 0	0 0	0 0	0 0	0 0	0 0	0 0	0 0	0 0	0 0	0 0	0 1	0 0	0 0	0 0	0 0
tig00000650	1602843	TCTAGGTTAACCC	ACTGGGTTACCCT	0 0	0 0	0 0	0 0	0 0	0 0	0 0	0 0	0 0	0 0	0 0	0 0	0 0	0 0	0 0	0 0	0 0	0 0	0 0	0 13	0 0	0 0	0 0	0 0	0 0	0 0	0 0	0 0	0 0	0 0	3 0	0 0	6 0	0 0	0 0	0 0	0 0	0 0	0 0	0 0	0 0	0 1	0 0	0 0	0 0	0 0
tig00000650	1602846	A	G	0 0	0 0	0 0	0 0	0 0	0 0	0 0	0 0	0 0	0 0	0 0	0 0	0 0	0 0	0 0	0 0	0 0	0 0	0 0	0 13	0 0	0 0	0 0	0 0	0 0	0 0	0 0	0 0	0 0	0 0	0 0	0 0	0 0	0 0	0 0	3 0	0 0	0 0	0 0	0 0	0 0	0 1	0 0	0 0	0 0	0 0
tig00000650	1602856	G	A	0 0	0 0	0 0	0 0	0 0	0 0	0 0	0 0	0 0	0 0	0 1	0 0	0 1	0 0	0 0	0 0	0 0	0 1	0 1	0 14	0 1	0 1	0 1	0 1	0 0	0 0	0 1	0 1	0 0	0 0	0 3	0 0	0 6	0 0	0 0	3 0	0 0	0 0	0 0	0 0	0 0	0 1	0 0	0 0	0 0	0 0
tig00000650	1602866	G	A	0 0	0 0	0 0	0 0	0 0	0 0	0 0	0 0	0 0	0 0	0 0	0 0	0 0	0 0	0 0	0 0	0 0	0 0	0 0	0 12	0 0	0 0	0 0	0 0	0 0	0 0	0 0	0 0	0 0	0 0	2 0	0 0	3 0	0 0	0 0	0 0	0 0	0 0	0 0	0 0	0 0	0 0	0 0	0 0	0 0	0 0
tig00000650	1602866	GG	AA	0 0	0 0	0 0	0 0	0 0	0 0	0 0	0 0	0 0	0 0	0 0	0 0	0 0	0 0	0 0	0 0	0 0	0 0	0 0	0 12	0 0	0 0	0 0	0 0	0 0	0 0	0 0	0 0	0 0	0 0	0 0	0 0	0 0	0 0	0 0	3 0	0 0	0 0	0 0	0 0	0 0	0 0	0 0	0 0	0 0	0 0
tig00000650	1602867	G	A	0 0	0 0	0 0	0 0	0 0	0 0	0 0	0 0	0 0	0 0	1 0	0 0	1 0	0 0	0 0	0 0	0 0	1 0	1 0	0 12	1 0	4 0	1 0	2 0	0 0	0 0	3 0	2 0	0 0	0 0	0 0	0 0	0 0	0 0	0 0	0 0	0 0	0 0	0 0	0 0	0 0	0 0	0 0	0 0	0 0	0 0
tig00000650	1602871	C	T	0 0	0 0	0 0	0 0	0 0	0 0	0 0	0 0	0 0	0 0	0 2	0 0	0 1	0 0	0 0	0 0	0 0	0 2	0 1	0 12	0 1	0 4	0 1	0 3	0 0	0 0	0 3	0 3	0 0	0 0	0 2	0 0	0 5	0 0	0 0	0 3	0 0	0 0	0 0	0 0	0 0	0 0	0 0	0 0	0 0	0 0
tig00000650	1602872	G	A	0 0	0 0	0 0	0 0	0 0	0 0	0 0	0 0	0 0	0 0	1 1	0 0	0 1	0 0	0 0	0 0	0 0	1 1	0 1	0 10	1 0	0 4	1 0	0 4	0 0	0 0	1 2	2 1	0 0	0 0	0 2	0 0	0 5	0 0	0 0	0 2	0 0	0 0	0 0	0 0	0 0	0 0	0 0	0 0	0 0	0 0
tig00000650	1602873	C	T	0 0	0 0	0 0	0 0	0 0	0 0	0 0	0 0	0 0	0 0	0 2	0 0	0 1	0 0	0 0	0 0	0 0	0 2	0 1	0 9	0 1	0 4	0 1	0 4	0 0	0 0	0 3	0 3	0 0	0 0	0 2	0 0	0 5	0 0	0 0	0 1	0 0	0 0	0 0	0 0	0 0	0 0	0 0	0 0	0 0	0 0
tig00000650	1602876	CATG	AATT	0 0	0 0	0 0	0 0	0 0	0 0	0 0	0 0	0 0	0 0	0 1	0 0	0 2	0 0	0 0	0 0	0 0	0 2	0 1	0 9	0 1	0 4	0 1	0 4	0 0	0 0	0 3	0 2	0 0	0 0	0 2	0 0	0 5	0 0	0 0	0 0	0 0	0 0	0 0	0 0	0 0	0 0	0 0	0 0	0 0	0 0
tig00000650	1602879	G	T	0 0	0 0	0 0	0 0	0 0	0 0	0 0	0 0	0 0	0 0	0 1	0 0	0 2	0 0	0 0	0 0	0 0	0 2	0 1	0 9	0 1	0 4	0 1	0 4	0 0	0 0	0 3	0 2	0 0	0 0	0 2	0 0	0 5	0 0	0 0	3 0	0 0	0 0	0 0	0 0	0 0	0 0	0 0	0 0	0 0	0 0
tig00000650	1602883	G	A	0 0	0 0	0 0	0 0	0 0	0 0	0 0	0 0	0 0	0 0	0 2	0 0	0 3	0 0	0 0	0 0	0 0	0 2	0 1	0 10	0 1	0 4	0 1	0 6	0 0	0 0	0 4	0 6	0 0	0 0	0 3	0 0	0 5	0 0	0 0	0 3	0 0	0 0	0 0	0 0	0 0	0 0	0 0	0 0	0 0	0 0
tig00000650	1602905	AAG	A	0 0	0 0	0 0	0 0	0 0	0 0	0 0	0 0	0 0	0 0	0 0	0 0	0 0	0 0	0 0	0 0	0 0	0 0	0 0	0 11	0 0	0 0	0 0	0 0	0 0	0 0	0 0	0 0	0 0	0 0	0 0	0 0	0 0	0 0	0 0	3 0	0 0	0 0	0 0	0 0	0 0	0 0	0 0	0 0	0 0	0 0
tig00000650	1602906	AG	A	0 0	0 0	0 0	0 0	0 0	0 0	0 0	0 0	0 0	0 0	0 0	0 0	0 0	0 0	0 0	0 0	0 0	0 0	0 0	0 11	0 0	0 0	0 0	0 0	0 0	0 0	0 0	0 0	0 0	0 0	1 0	0 0	3 0	0 0	0 0	0 0	0 0	0 0	0 0	0 0	0 0	0 0	0 0	0 0	0 0	0 0
tig00000650	1602907	G	A	0 0	0 0	0 0	0 0	0 0	0 0	0 0	0 0	0 0	0 0	2 0	0 0	8 0	0 0	0 0	0 0	0 0	2 0	0 0	0 11	0 0	4 0	0 0	9 0	0 0	0 0	7 0	9 0	0 0	0 0	1 0	0 0	0 0	0 0	0 0	0 0	0 0	0 0	0 0	0 0	0 0	0 0	0 0	0 0	0 0	0 0
tig00000650	1602907	G	AA	0 0	0 0	0 0	0 0	0 0	0 0	0 0	0 0	0 0	0 0	0 0	0 0	0 0	0 0	0 0	0 0	0 0	0 0	0 0	0 11	0 0	0 0	0 0	0 0	0 0	0 0	0 0	0 0	0 0	0 0	0 0	0 0	0 0	0 0	0 0	0 0	0 0	0 0	0 0	0 0	0 0	0 0	0 0	0 0	0 0	0 0
tig00000650	1602912	A	C	0 0	0 0	0 0	0 0	0 0	0 0	0 0	0 0	0 0	0 0	2 0	0 0	9 0	0 0	0 0	0 0	0 0	4 0	1 0	0 11	0 0	4 0	1 0	11 0	0 0	0 0	8 0	10 0	0 0	0 0	0 2	0 0	0 3	0 0	0 0	0 3	0 0	0 0	0 0	0 0	0 0	0 0	0 0	0 0	0 0	0 0
tig00000650	1602914	T	A	0 0	0 0	0 0	0 0	0 0	0 0	0 0	0 0	0 0	0 0	0 2	0 0	0 9	0 0	0 0	0 0	0 0	0 4	0 2	0 10	0 0	0 4	0 1	0 11	0 0	0 0	0 8	0 11	0 0	0 0	1 1	0 0	3 0	0 0	0 0	3 0	0 0	0 0	0 0	0 0	0 0	0 0	0 0	0 0	0 0	0 0
tig00000650	1602919	T	G	0 0	0 0	0 0	0 0	0 0	0 0	0 0	0 0	0 0	0 0	2 0	0 0	9 0	0 0	0 0	0 0	0 0	3 0	2 0	0 9	0 0	4 0	0 0	12 0	0 0	0 0	8 0	11 0	0 0	0 0	1 0	0 0	3 0	0 0	0 0	3 0	0 0	0 0	0 0	0 0	0 0	0 0	0 0	0 0	0 0	0 0
tig00000650	1602919	TGG	GGA	0 0	0 0	0 0	0 0	0 0	0 0	0 0	0 0	0 0	0 0	0 0	0 0	0 0	0 0	0 0	0 0	0 0	0 0	0 0	0 9	0 0	0 0	0 0	0 0	0 0	0 0	0 0	0 0	0 0	0 0	0 0	0 0	0 0	0 0	0 0	0 0	0 0	0 0	0 0	0 0	0 0	0 0	0 0	0 0	0 0	0 0
tig00000650	1602947	C	T	0 0	0 0	0 0	0 0	0 0	0 0	0 1	0 0	0 0	0 0	0 2	0 0	0 11	0 0	0 0	0 0	0 0	0 4	0 3	0 10	0 0	0 0	0 3	0 13	0 0	0 0	0 9	0 13	0 0	0 2	0 0	0 0	0 0	0 0	0 0	0 3	0 0	0 0	0 0	0 0	0 0	0 0	0 0	0 0	0 0	0 0
tig00000650	1602947	CCGTC	TCGTT	0 0	0 0	0 0	0 0	0 0	0 0	0 1	0 0	0 0	0 0	0 2	0 0	0 11	0 0	0 0	0 0	0 0	0 4	0 3	0 10	0 0	0 0	0 3	0 13	0 0	0 0	0 9	0 13	0 0	0 2	2 0	0 0	4 0	0 0	0 0	0 3	0 0	0 0	0 0	0 0	0 0	0 0	0 0	0 0	0 0	0 0
tig00000650	1602955	CCCGGG	TCTGGA	0 0	0 0	0 0	0 0	0 0	0 0	0 1	0 0	0 0	0 0	0 1	0 0	0 12	0 0	0 0	0 0	0 0	0 4	0 3	0 9	0 1	0 0	0 3	0 12	0 0	0 0	0 9	0 14	0 0	0 2	0 2	0 0	0 2	0 0	0 0	0 0	0 0	0 0	0 0	0 0	0 0	0 0	0 0	0 0	0 0	0 0
tig00000650	1602956	CCGGG	GGGGA	0 0	0 0	0 0	0 0	0 0	0 0	0 1	0 0	0 0	0 0	0 1	0 0	0 12	0 0	0 0	0 0	0 0	0 4	0 3	0 9	0 1	0 0	0 3	0 12	0 0	0 0	0 9	0 14	0 0	0 2	0 2	0 0	0 2	0 0	0 0	0 0	0 0	0 0	0 0	0 0	0 0	0 0	0 0	0 0	0 0	0 0
tig00000650	1602959	GG	AA	0 0	0 0	0 0	0 0	0 0	0 0	0 1	0 0	0 0	0 0	0 1	0 0	0 12	0 0	0 0	0 0	0 0	0 4	0 3	0 9	0 1	0 0	0 3	0 12	0 0	0 0	0 9	0 14	0 0	0 2	0 2	0 0	0 2	0 0	0 0	3 0	0 0	0 0	0 0	0 0	0 0	0 0	0 0	0 0	0 0	0 0
tig00000650	1602964	C	T	0 0	0 0	0 0	0 0	0 0	0 0	0 1	0 0	0 0	0 0	1 0	1 0	9 4	0 0	0 0	0 0	0 0	1 4	1 2	0 8	0 1	0 0	0 3	13 0	0 0	0 0	5 3	8 6	0 0	0 2	0 2	0 0	0 4	0 0	0 0	0 3	0 0	0 0	0 0	0 0	0 0	0 0	0 0	0 0	0 0	0 0
tig00000650	1602980	G	A	0 0	0 0	0 0	0 0	0 0	0 0	0 1	0 0	0 0	0 0	0 1	0 2	0 10	0 0	0 0	0 0	0 0	0 4	0 5	0 7	0 1	0 0	0 3	0 10	0 0	0 0	0 8	0 10	0 0	0 2	0 1	0 0	0 4	0 0	0 0	3 0	0 0	0 0	0 0	0 0	0 0	0 0	0 0	0 0	0 0	0 0
tig00000650	1602989	A	G	0 0	0 0	0 0	0 0	0 0	0 0	0 0	0 0	0 0	0 0	0 1	0 2	0 8	0 0	0 0	0 0	0 0	0 4	0 6	0 7	0 1	0 0	0 2	0 9	0 0	0 0	0 7	0 9	0 0	0 2	0 1	0 0	0 4	0 0	0 0	1 0	0 0	0 0	0 0	0 0	0 0	0 0	0 0	0 0	0 0	0 0
tig00000650	1602991	AGAAA	TGAAG	0 0	0 0	0 0	0 0	0 0	0 0	0 0	0 0	0 0	0 0	0 0	0 0	0 0	0 0	0 0	0 0	0 0	0 0	0 0	0 7	0 0	0 0	0 0	0 0	0 0	0 0	0 0	0 0	0 0	0 0	0 1	0 0	0 4	0 0	0 0	0 1	0 0	0 0	0 0	0 0	0 0	0 0	0 0	0 0	0 0	0 0
tig00000650	1602993	A	T	0 0	0 0	0 0	0 0	0 0	0 0	0 0	0 0	0 0	0 0	1 0	2 0	6 0	0 0	0 0	0 0	0 0	3 0	5 0	0 7	1 0	0 0	2 0	8 0	0 0	0 0	5 0	8 0	0 0	2 0	0 1	0 0	0 4	0 0	0 0	0 1	0 0	0 0	0 0	0 0	0 0	0 0	0 0	0 0	0 0	0 0
tig00000650	1602996	G	A	0 0	0 0	0 0	0 0	0 0	0 0	0 0	0 0	0 0	0 0	0 1	0 2	0 5	0 0	0 0	0 0	0 0	0 3	0 6	0 7	0 1	0 0	0 2	0 8	0 0	0 0	0 7	0 8	0 0	0 2	0 1	0 0	0 4	0 0	0 0	0 1	0 0	0 0	0 0	0 0	0 0	0 0	0 0	0 0	0 0	0 0
tig00000650	1603007	T	C	0 0	0 0	0 0	0 0	0 0	0 0	0 0	0 0	0 0	0 0	0 1	0 2	0 3	0 0	0 0	0 0	0 0	0 2	0 5	0 6	0 1	0 0	0 2	0 6	0 0	0 0	0 6	0 6	0 0	0 2	0 1	0 0	0 4	0 0	0 0	1 0	0 0	0 0	0 0	0 0	0 0	0 0	0 4	0 0	0 0	0 0
tig00000650	1603011	C	T	0 0	0 0	0 0	0 0	0 0	0 0	0 0	0 0	0 0	0 0	0 1	0 2	0 4	0 0	0 0	0 0	0 0	0 2	0 5	0 6	0 1	0 0	0 2	0 6	0 0	0 0	0 5	0 6	0 0	0 2	1 0	0 0	4 0	0 0	0 0	0 1	0 0	0 0	0 0	0 0	0 0	0 0	0 4	0 0	0 0	0 0
tig00000650	1603013	A	G	0 0	0 0	0 0	0 0	0 0	0 0	0 0	0 0	0 0	0 0	0 1	0 2	0 4	0 0	0 0	0 0	0 0	0 2	0 5	0 7	0 1	0 0	0 2	0 5	0 0	0 0	0 5	0 6	0 0	0 2	0 1	0 0	0 4	0 0	0 0	1 0	0 0	0 0	0 0	0 0	0 0	0 0	0 4	0 0	0 0	0 0
tig00000650	1603025	C	T	0 0	0 0	0 0	0 0	0 0	0 0	0 0	0 0	0 0	0 0	0 0	0 2	0 4	0 0	0 0	0 0	0 0	0 2	0 4	0 5	0 1	0 0	0 2	0 4	0 0	0 0	0 5	0 5	0 0	0 1	0 0	0 0	0 4	0 0	0 0	1 0	0 0	0 0	0 0	0 0	0 0	0 0	0 0	0 0	0 0	0 0
tig00000650	1603034	T	A	0 0	0 0	0 0	0 0	0 0	0 0	0 0	0 0	0 0	0 0	1 0	2 0	3 0	0 0	0 0	0 0	0 0	1 0	3 0	0 3	1 0	0 1	2 0	2 0	0 0	0 0	2 0	5 0	0 0	0 0	0 0	0 0	0 4	0 0	0 0	0 1	0 0	0 0	0 0	0 0	0 0	0 0	0 0	0 0	0 0	0 0
tig00000650	1603171	ATG	TTGAACCTA	0 0	0 0	0 0	0 0	0 0	0 0	0 0	0 0	0 0	0 0	0 0	0 0	0 0	0 0	0 0	0 0	0 0	0 0	0 0	0 7	0 0	0 0	0 0	0 0	0 0	0 0	0 0	0 0	0 0	0 0	0 0	0 0	0 0	0 0	0 0	0 0	0 0	0 0	0 0	0 0	0 0	0 0	0 0	0 0	0 0	0 0
tig00000650	1603173	G	GAACCTA	0 0	0 0	0 0	0 0	0 0	0 0	0 0	0 0	0 0	0 0	0 0	0 0	0 0	0 0	0 0	0 0	0 0	0 0	0 0	0 7	0 0	0 0	0 0	0 0	0 0	0 0	0 0	0 0	0 0	0 0	0 0	0 0	0 0	0 0	0 0	0 0	0 0	0 0	0 0	0 0	0 0	0 0	0 0	0 0	0 0	0 0
tig00000650	1603173	G	GAACTTA	0 0	0 0	0 0	0 0	0 0	0 0	0 0	0 0	0 0	0 0	0 0	0 0	0 0	0 0	0 0	0 0	0 0	0 0	0 0	0 7	0 0	0 0	0 0	0 0	0 0	0 0	0 0	0 0	0 0	0 0	1 0	0 0	1 0	0 0	0 0	0 0	0 0	0 0	0 0	0 0	0 0	0 0	0 0	0 0	0 0	0 0
tig00000650	1603191	G	A	0 0	0 0	0 0	0 0	0 0	0 0	0 0	0 0	0 0	0 0	0 0	0 0	0 0	0 0	0 0	0 0	0 0	0 0	0 0	0 9	0 0	0 0	0 0	0 0	0 0	0 0	0 0	0 0	0 0	0 0	3 0	0 0	1 0	0 0	0 0	0 0	0 0	0 0	0 0	0 0	0 0	0 0	0 0	0 0	0 0	0 0
tig00000650	1603195	C	A	0 0	0 0	0 0	0 0	0 0	0 0	0 0	0 0	0 0	0 0	0 0	0 0	0 0	0 0	0 0	0 0	0 0	0 0	0 0	0 9	0 0	0 0	0 0	0 0	0 0	0 0	0 0	0 0	0 0	0 0	3 0	0 0	0 0	0 0	0 0	0 0	0 0	0 0	0 0	0 0	0 0	0 0	0 0	0 0	0 0	0 0
tig00000650	1603204	A	G	0 0	0 0	0 0	0 0	0 0	0 0	0 0	0 0	0 0	0 0	0 0	0 0	0 0	0 0	0 0	0 0	0 0	0 0	0 0	0 9	0 0	0 0	0 0	0 0	0 0	0 0	0 0	0 0	0 0	0 0	3 3	0 0	1 0	0 0	0 0	0 0	0 0	0 0	0 0	0 0	0 0	0 0	0 0	0 0	0 0	0 0
tig00000650	1603204	AG	GA	0 0	0 0	0 0	0 0	0 0	0 0	0 0	0 0	0 0	0 0	1 0	0 0	1 0	0 0	0 0	0 0	0 0	0 0	4 0	0 9	0 0	0 0	0 0	1 0	0 0	0 0	2 0	1 0	0 0	0 0	0 3	0 0	0 0	0 0	0 0	0 0	0 0	0 0	0 0	0 0	0 0	0 0	0 0	0 0	0 0	0 0
tig00000650	1603219	G	A	0 0	0 0	0 0	0 0	0 0	0 0	0 0	0 0	0 0	0 0	0 2	0 1	0 7	0 0	0 0	0 0	0 0	0 0	0 9	0 10	0 0	0 0	0 1	0 12	0 0	0 0	0 7	0 6	0 0	0 3	3 3	0 0	1 0	0 0	0 0	0 0	0 0	0 0	0 0	0 0	0 0	0 0	0 0	0 0	0 0	0 0
tig00000650	1603230	C	T	0 0	0 0	0 0	0 0	0 0	0 0	0 0	0 0	0 0	0 0	0 2	0 1	0 7	0 0	0 0	0 0	0 0	0 0	0 9	0 9	0 0	0 0	0 1	0 12	0 0	0 0	0 7	0 6	0 0	0 3	2 3	0 0	0 1	0 0	0 0	0 0	0 0	0 0	0 0	0 0	0 0	0 0	0 0	0 0	0 0	0 0
tig00000650	1603230	CTA	TTT	0 0	0 0	0 0	0 0	0 0	0 0	0 0	0 0	0 0	0 0	0 2	0 1	0 7	0 0	0 0	0 0	0 0	0 0	0 9	0 9	0 0	0 0	0 1	0 12	0 0	0 0	0 7	0 6	0 0	0 3	0 3	0 0	0 1	0 0	0 0	0 0	0 0	0 0	0 0	0 0	0 0	0 0	0 0	0 0	0 0	0 0
tig00000650	1603238	CGTG	TGT	0 0	0 0	0 0	0 0	0 0	0 0	0 0	0 0	0 0	0 0	0 2	0 1	0 7	0 0	0 0	0 0	0 0	0 0	0 8	0 6	0 0	0 0	0 1	0 10	0 0	0 0	0 7	0 7	0 0	0 3	0 0	0 2	0 0	0 0	0 0	0 0	0 0	0 0	0 0	0 0	0 0	0 0	0 0	0 0	0 0	0 0
tig00000650	1603240	TG	T	0 0	0 0	0 0	0 0	0 0	0 0	0 0	0 0	0 0	0 0	0 2	0 1	0 7	0 0	0 0	0 0	0 0	0 0	0 8	0 6	0 0	0 0	0 1	0 10	0 0	0 0	0 7	0 7	0 0	0 3	1 0	0 2	1 0	0 0	0 0	0 0	0 0	0 0	0 0	0 0	0 0	0 0	0 0	0 0	0 0	0 0
tig00000650	1603247	G	A	0 0	0 0	0 0	0 0	0 0	0 0	0 0	0 0	0 0	0 0	0 2	0 1	0 7	0 0	0 0	0 0	0 0	0 0	0 8	0 6	0 0	0 0	0 1	0 10	0 0	0 0	0 7	0 7	0 0	0 3	0 0	0 2	0 0	0 0	0 0	0 0	0 0	0 0	0 0	0 0	0 0	0 0	0 0	0 0	0 0	0 0
tig00000650	1603255	G	A	0 0	0 0	0 0	0 0	0 0	0 0	0 0	0 0	0 0	0 0	0 2	0 1	0 7	0 0	0 0	0 0	0 0	0 0	0 7	0 6	0 0	0 0	0 1	0 8	0 0	0 0	0 7	0 5	0 0	0 3	0 0	0 0	0 0	0 0	0 0	0 0	0 0	0 0	0 0	0 0	0 0	0 0	0 0	0 0	0 0	0 0
tig00000650	1603259	T	TC	0 0	0 0	0 0	0 0	0 1	0 0	0 0	0 0	0 0	0 0	2 0	1 0	5 0	0 0	0 0	0 0	0 0	0 0	6 0	0 6	0 0	0 0	0 0	6 0	0 0	0 0	6 0	5 1	0 0	3 0	1 0	0 2	1 0	0 0	0 0	0 0	0 0	0 0	0 0	0 0	0 0	0 0	0 0	0 0	0 0	0 0
tig00000650	1603273	A	G	0 0	0 0	0 0	0 0	0 1	0 0	0 0	0 0	0 0	0 0	2 0	0 0	3 0	0 0	0 0	0 0	0 0	0 0	6 0	0 6	0 0	0 0	0 0	3 0	0 0	0 0	6 0	5 1	0 0	2 0	0 0	0 2	1 0	0 0	0 0	0 0	0 0	0 0	0 0	0 0	0 0	0 0	0 0	0 0	0 0	0 0
tig00000650	1603285	T	A	0 0	0 0	0 0	0 0	0 1	0 0	0 0	0 0	0 0	0 0	0 0	0 0	0 0	0 0	0 0	0 0	0 0	0 0	0 0	0 5	0 0	0 0	0 0	0 0	0 0	0 0	0 0	0 0	0 0	0 0	0 0	4 0	0 1	0 0	0 0	0 0	0 0	0 0	0 0	0 0	0 0	0 0	0 0	0 0	0 0	0 0
tig00000650	1603294	C	T	0 0	0 0	0 0	0 0	0 0	0 0	0 0	0 0	0 0	0 0	0 0	0 0	0 0	0 0	0 0	0 0	0 0	0 0	0 0	0 6	0 0	0 0	0 0	0 0	0 0	0 3	0 0	0 0	0 0	0 0	0 1	3 8	1 2	0 0	0 0	0 0	0 0	0 0	0 0	0 0	0 0	0 0	0 0	0 0	0 0	0 0
tig00000650	1603297	A	G	0 0	0 0	0 0	0 0	0 0	0 0	0 0	0 0	0 0	0 0	0 0	0 0	0 0	0 0	0 0	0 0	0 0	0 0	0 0	0 6	0 0	0 0	0 0	0 0	0 0	0 3	0 0	0 0	0 0	0 0	0 1	10 4	2 1	0 0	0 0	0 0	0 0	0 0	0 0	0 0	0 0	0 0	0 0	0 0	0 0	0 0
tig00000650	1603302	C	T	0 0	0 0	0 0	0 0	0 0	0 0	0 0	0 0	0 0	0 0	0 0	0 0	0 0	0 0	0 0	0 0	0 0	0 0	0 0	0 6	0 0	0 0	0 0	0 0	0 0	0 3	0 0	0 0	0 0	0 0	1 0	0 15	0 3	0 0	0 0	0 0	0 0	0 0	0 0	0 0	0 0	0 0	0 0	0 0	0 0	0 0
tig00000650	1603315	T	C	0 0	0 0	0 0	0 0	0 0	0 0	0 0	0 0	0 0	0 0	0 0	0 0	0 0	0 0	0 0	0 0	0 0	0 0	0 0	0 5	0 0	0 0	0 0	0 0	0 0	0 5	0 0	0 0	0 0	0 0	0 1	0 20	0 3	0 0	0 0	0 0	0 0	0 0	0 0	0 0	0 0	0 0	0 0	0 0	0 1	0 0
tig00000650	1603322	C	T	0 0	0 0	0 0	0 0	0 0	0 0	0 0	0 0	0 0	0 0	0 0	0 0	0 0	0 0	0 0	0 0	0 0	0 0	0 0	0 5	0 0	0 0	0 0	0 0	0 0	6 0	0 0	0 0	0 0	0 0	1 0	7 13	3 0	0 0	0 0	0 0	0 0	0 0	0 0	0 0	0 0	0 0	0 0	0 0	1 0	0 0
tig00000650	1603328	A	T	0 0	0 0	0 0	0 0	0 0	0 0	0 0	0 0	0 0	0 0	0 0	0 0	0 0	0 0	0 0	0 0	0 0	0 0	0 1	0 5	0 0	0 0	0 0	0 0	0 0	0 9	0 0	0 0	0 0	0 0	0 1	0 21	0 3	0 0	0 0	0 0	0 0	0 0	0 0	0 0	0 0	0 0	0 0	0 0	0 1	0 0
tig00000650	1603334	TATC	GATT	0 0	0 0	0 0	0 0	0 0	0 0	0 0	0 0	0 0	0 0	0 0	0 0	0 0	0 0	0 0	0 0	0 0	0 0	0 1	0 5	0 0	0 0	0 0	0 0	0 0	0 9	0 0	0 0	0 0	0 0	0 1	0 18	0 2	0 0	0 0	0 0	0 0	0 0	0 0	0 0	0 0	0 0	0 0	0 0	0 1	0 0
tig00000650	1603337	C	T	0 0	0 0	0 0	0 0	0 0	0 0	0 0	0 0	0 0	0 0	0 0	0 0	0 0	0 0	0 0	0 0	0 0	0 0	0 1	0 5	0 0	0 0	0 0	0 0	0 0	0 9	0 0	0 0	0 0	0 0	0 1	6 18	1 2	0 0	0 0	0 0	0 0	0 0	0 0	0 0	0 0	0 0	0 0	0 0	0 1	0 0
tig00000650	1603343	TTG	T	0 0	0 0	0 0	0 0	0 0	0 0	0 0	0 0	0 0	0 0	0 0	0 0	0 0	0 0	0 0	0 0	0 0	0 0	0 1	0 5	0 0	0 0	0 0	0 0	0 0	0 9	0 0	0 0	0 0	0 0	0 1	0 24	0 3	0 0	0 0	0 0	0 0	0 1	0 0	0 0	0 0	0 0	0 0	0 0	0 1	0 0
tig00000650	1603348	CA	AG	0 0	0 0	0 0	0 0	0 0	0 0	0 0	0 0	0 0	0 0	0 0	0 0	0 0	0 0	0 0	0 0	0 0	0 0	0 1	0 6	0 0	0 0	0 0	0 0	0 0	9 0	0 0	0 0	0 0	0 0	0 1	0 24	0 3	0 0	0 0	0 0	0 0	0 1	0 0	0 0	0 0	0 0	0 0	0 0	0 1	0 0
tig00000650	1603353	C	A	0 0	0 0	0 0	0 0	0 0	0 0	0 0	0 0	0 0	0 0	0 0	0 0	0 0	0 0	0 0	0 0	0 0	0 0	0 1	0 6	0 0	0 0	0 0	0 0	0 0	0 9	0 0	0 0	0 0	0 0	0 1	18 0	2 0	0 0	0 0	0 0	0 0	0 1	0 0	0 0	0 0	0 0	0 0	0 0	0 1	0 0
tig00000650	1603353	C	T	0 0	0 0	0 0	0 0	0 0	0 0	0 0	0 0	0 0	0 0	0 0	0 0	0 0	0 0	0 0	0 0	0 0	0 0	0 1	0 6	0 0	0 0	0 0	0 0	0 0	0 9	0 0	0 0	0 0	0 0	0 1	6 0	1 0	0 0	0 0	0 0	0 0	0 1	0 0	0 0	0 0	0 0	0 0	0 0	0 1	0 0
tig00000650	1603359	GGT	TGC	0 0	0 0	0 0	0 0	0 0	0 0	0 0	0 0	0 0	0 0	0 0	0 0	0 0	0 0	0 0	0 0	0 0	0 0	0 0	0 6	0 0	0 0	0 0	0 0	0 0	0 0	0 0	0 0	0 0	0 0	0 0	0 6	0 1	0 0	0 0	0 0	0 0	0 0	0 0	0 0	0 0	0 0	0 0	0 0	0 0	0 0
tig00000650	1603361	T	C	0 0	0 0	0 0	0 0	0 0	0 0	0 0	0 0	0 0	0 0	0 0	0 0	0 0	0 0	0 0	0 0	0 0	0 0	0 0	0 6	0 0	0 0	0 0	0 0	0 0	0 0	0 0	0 0	0 0	0 0	0 0	18 6	2 1	0 0	0 0	0 0	0 0	0 0	0 0	0 0	0 0	0 0	0 0	0 0	0 0	0 0
tig00000650	1603361	TG	CA	0 0	0 0	0 0	0 0	0 0	0 0	0 0	0 0	0 0	0 0	0 0	0 0	0 0	0 0	0 0	0 0	0 0	0 0	0 0	0 6	0 0	0 0	0 0	0 0	0 0	0 0	0 0	0 0	0 0	0 0	0 0	0 6	0 1	0 0	0 0	0 0	0 0	0 0	0 0	0 0	0 0	0 0	0 0	0 0	0 0	0 0
tig00000650	1603361	TGGAG	CGGAT	0 0	0 0	0 0	0 0	0 0	0 0	0 0	0 0	0 0	0 0	0 0	0 0	0 0	0 0	0 0	0 0	0 0	0 0	0 0	0 6	0 0	0 0	0 0	0 0	0 0	9 0	0 0	0 0	0 0	0 0	0 0	0 6	0 1	0 0	0 0	0 0	0 0	0 0	0 0	0 0	0 0	0 0	0 0	0 0	0 0	0 0
tig00000650	1603374	A	T	0 14	0 11	0 7	0 10	0 14	0 11	0 8	0 9	0 18	0 10	0 5	0 0	0 2	0 8	0 0	0 5	0 9	0 4	0 9	0 4	0 3	0 4	0 4	0 9	0 14	0 15	0 7	0 5	0 9	0 6	0 0	0 20	0 4	0 0	0 0	0 0	0 0	0 1	0 0	0 0	0 0	0 0	0 0	0 0	0 1	0 1
tig00000650	1603376	A	C	14 0	11 0	7 0	10 0	14 0	11 0	8 0	9 0	18 0	9 1	5 0	0 0	2 0	8 0	0 0	5 0	9 0	4 0	8 1	0 4	3 0	4 0	4 0	9 0	14 0	15 0	7 0	5 0	9 0	6 0	0 0	0 17	2 2	0 0	0 0	0 0	0 0	0 1	0 0	0 0	0 0	0 0	0 0	0 0	0 1	0 1
tig00000650	1603381	AA	TT	0 0	0 0	0 0	0 0	0 0	0 0	0 0	0 0	0 0	0 0	0 0	0 0	0 0	0 0	0 0	0 0	0 0	0 0	0 0	0 5	0 0	0 0	0 0	0 0	0 0	0 0	0 0	0 0	0 0	0 0	0 0	8 0	2 0	0 0	0 0	0 0	0 0	0 0	0 0	0 0	0 0	0 0	0 0	0 0	0 0	0 0
tig00000650	1603382	A	AATT	0 0	0 0	0 0	0 0	0 0	0 0	0 0	0 0	8 0	0 0	0 0	0 0	0 0	3 0	0 0	0 0	0 0	0 0	0 0	0 5	2 0	1 0	0 0	3 0	0 0	0 0	0 0	0 0	0 0	0 0	0 0	0 0	0 0	0 0	0 0	0 0	0 0	0 0	0 0	0 0	0 0	0 0	0 0	0 0	0 0	0 0
tig00000650	1603382	A	ATT	14 0	10 0	6 0	9 0	14 0	9 0	8 0	9 0	8 0	10 0	4 0	0 0	1 0	4 0	0 0	4 0	9 0	4 0	8 0	0 5	1 0	2 0	4 0	4 0	13 0	13 0	5 0	4 0	8 0	6 0	0 0	0 0	0 0	0 0	0 0	0 0	0 0	0 0	0 0	0 0	0 0	0 0	0 0	0 0	0 0	0 0
tig00000650	1603400	A	G	0 14	0 11	0 7	0 10	0 14	0 10	0 8	0 9	0 18	0 11	0 5	0 0	0 2	0 8	0 0	0 5	0 9	0 4	0 8	0 2	0 3	0 4	0 4	0 9	0 14	0 12	0 7	0 5	0 9	0 6	0 0	0 4	0 4	0 0	0 0	0 0	0 0	0 0	0 0	0 0	0 0	0 0	0 0	0 0	0 1	0 0
tig00000650	1603422	G	A	0 0	1 0	1 0	1 0	0 0	3 0	2 0	1 0	2 0	2 0	3 0	0 0	1 0	2 0	0 0	1 0	2 0	0 0	0 0	0 3	0 0	2 0	0 0	2 0	3 0	2 0	2 0	0 0	0 0	1 0	0 0	0 0	1 0	0 0	0 0	0 0	0 0	0 0	0 0	0 0	0 0	0 0	0 0	0 0	1 0	0 0
tig00000650	1603426	A	T	0 0	0 0	0 0	0 0	0 0	0 0	0 0	0 0	0 0	0 0	0 0	0 0	0 0	0 0	0 0	0 0	0 0	0 0	0 0	0 3	0 0	0 0	0 0	0 0	0 0	0 0	0 0	0 0	0 0	0 0	0 0	0 0	0 1	0 0	0 0	0 0	0 0	0 0	0 0	0 0	0 0	0 0	0 0	0 0	0 1	0 0
tig00000650	1603431	A	G	0 0	0 0	0 0	0 0	0 0	0 0	0 0	0 0	0 0	0 0	0 0	0 0	0 0	0 0	0 0	0 0	0 0	0 0	0 0	0 4	0 0	0 0	0 0	0 0	0 0	0 0	0 0	0 0	0 0	0 0	0 0	0 0	1 0	0 0	0 0	0 0	0 0	0 0	0 0	0 0	0 0	0 0	0 0	0 0	1 0	0 0
tig00000650	1603441	AC	A	0 0	0 0	0 0	0 0	0 0	0 0	0 0	0 0	0 0	0 0	0 0	0 0	0 0	0 0	0 0	0 0	0 0	0 0	0 0	0 4	0 0	0 0	0 0	0 0	0 0	0 0	0 0	0 0	0 0	0 0	0 0	0 0	0 1	0 0	0 0	0 0	0 0	0 0	0 0	0 0	0 0	0 0	0 0	0 0	0 0	0 0
tig00000650	1603451	T	C	0 0	0 0	0 0	0 0	0 0	0 0	0 0	0 0	0 0	0 0	0 0	0 0	0 0	0 0	0 0	0 0	0 0	0 0	0 0	0 6	0 0	0 0	0 0	0 0	0 0	0 0	0 0	0 0	0 0	0 0	0 0	0 0	0 1	0 0	0 0	0 0	0 0	0 1	0 0	0 0	0 0	0 0	0 0	0 0	0 0	0 0
tig00000650	1603461	C	T	0 0	0 0	0 0	0 0	0 0	0 0	0 0	0 0	0 0	0 0	0 0	0 0	0 0	0 0	0 0	0 0	0 0	0 0	0 0	0 7	0 0	0 0	0 0	0 0	0 0	0 0	0 0	0 0	0 0	0 0	0 0	0 0	1 0	0 0	0 0	0 0	0 0	2 0	0 0	0 0	0 0	0 0	0 0	0 0	0 0	0 0
tig00000650	1603486	T	C	0 0	0 0	0 0	0 0	0 0	0 0	0 0	0 0	0 0	0 0	0 0	0 0	0 0	0 0	0 0	0 0	0 0	0 0	0 0	0 8	0 0	0 0	0 0	0 0	0 0	0 0	0 0	0 0	0 0	0 0	0 1	0 0	0 1	0 0	0 0	0 0	0 0	0 2	0 0	0 0	0 0	0 0	0 0	0 0	0 0	0 0
tig00000650	1603493	C	A	0 0	0 0	0 0	0 0	0 0	0 0	0 0	0 0	0 0	0 0	0 0	0 0	0 0	0 0	0 0	0 0	0 0	0 0	0 0	0 8	0 0	0 0	0 0	0 0	0 0	0 0	0 0	0 0	0 0	0 0	1 0	0 0	0 0	0 0	0 0	0 0	0 0	0 0	0 0	0 0	0 0	0 0	0 0	0 0	0 0	0 0
tig00000650	1603507	C	A	0 0	0 0	0 0	0 0	0 0	0 0	0 0	0 0	0 0	0 0	0 0	0 0	0 0	0 0	0 0	0 0	0 0	0 0	0 0	0 7	0 0	0 0	0 0	0 0	0 0	0 0	0 0	0 0	0 0	0 0	1 0	0 0	0 0	0 0	0 0	0 0	0 0	2 0	0 0	0 0	0 0	0 0	0 0	0 0	0 0	0 0
tig00000650	1603695	A	T	0 0	0 0	0 0	0 0	0 0	0 0	0 0	0 0	0 0	0 0	0 0	0 0	0 1	0 0	0 0	0 0	0 0	0 0	0 0	0 6	0 0	0 0	0 0	0 0	0 4	0 0	0 0	0 0	0 0	0 1	0 0	0 0	0 0	0 0	0 0	0 0	0 0	0 0	0 0	0 0	0 0	0 0	0 2	0 0	0 0	0 0
tig00000650	1603740	GCACT	ACACA	0 0	0 0	0 0	0 0	0 0	0 0	0 0	0 0	0 0	0 0	0 0	0 0	0 0	0 0	0 0	0 0	0 0	0 0	0 0	0 5	0 0	0 0	0 0	0 0	0 0	0 0	0 0	0 0	0 0	0 0	0 0	0 0	0 0	0 0	0 0	0 0	0 0	1 0	4 0	0 0	0 0	0 0	1 0	0 0	1 0	3 0
tig00000650	1603764	GT	G	0 0	0 0	0 0	0 0	0 0	0 0	0 0	0 0	0 0	0 0	0 0	0 0	0 0	0 0	0 0	0 0	0 0	0 0	0 0	0 4	0 0	0 0	0 0	0 0	0 0	0 0	0 0	0 0	0 0	0 0	4 0	1 0	0 0	0 0	0 0	0 0	0 0	0 0	0 0	0 0	0 0	0 0	0 0	0 0	0 0	0 0
tig00000650	1603770	TC	T	0 0	0 0	0 0	0 0	0 0	0 0	0 0	0 0	0 0	0 0	0 0	0 0	0 0	0 0	0 0	0 0	0 0	0 0	0 0	0 4	0 0	0 0	0 0	0 0	0 0	0 0	0 0	0 0	0 0	0 0	0 0	3 0	2 0	0 0	0 0	0 0	3 0	2 0	5 0	1 0	4 0	2 0	0 0	1 0	0 0	0 0
tig00000650	1603771	C	T	0 0	0 0	0 0	0 0	0 0	0 0	0 0	0 0	0 0	0 0	0 0	0 0	0 0	0 0	0 0	0 0	0 0	0 0	0 0	0 4	0 0	0 0	0 0	0 0	0 0	0 0	0 0	0 0	0 0	0 0	0 0	0 0	0 0	0 0	0 0	0 0	0 0	1 0	1 0	0 0	0 0	0 0	5 0	0 0	3 0	4 0
tig00000650	1603795	GTATG	ATATT	0 7	0 12	0 3	0 13	0 26	0 15	0 11	0 8	0 11	0 14	0 2	0 2	0 2	0 11	0 1	0 3	0 9	0 1	0 3	0 7	0 1	0 6	0 3	0 2	0 5	0 6	0 4	0 3	0 2	0 2	0 13	0 11	0 4	0 0	0 0	0 0	0 6	0 9	0 8	0 4	0 4	0 10	0 7	0 6	0 7	0 5
tig00000650	1603813	T	C	14 0	17 0	9 0	21 0	36 0	24 0	19 0	14 0	22 0	25 0	3 0	2 0	4 0	21 0	4 0	8 0	13 0	2 0	5 0	0 6	2 0	9 1	4 4	5 0	14 0	17 0	3 3	3 3	5 3	2 0	13 0	15 0	5 0	0 0	0 0	0 0	0 10	0 12	0 14	0 6	0 8	0 14	0 9	0 8	0 13	0 13
tig00000650	1603827	T	A	0 19	0 21	0 13	0 29	0 38	0 32	0 26	0 19	0 30	0 27	0 6	0 4	0 5	0 29	0 6	0 11	0 24	0 2	0 13	0 6	0 3	0 14	0 10	0 6	0 20	0 22	0 7	0 7	0 14	0 4	0 15	0 23	0 7	0 0	0 0	0 1	0 11	0 14	0 13	0 8	0 12	0 14	0 9	0 9	0 14	0 14
tig00000650	1603831	T	C	0 26	0 22	0 14	0 36	0 39	0 35	0 30	0 21	0 31	0 31	0 8	0 4	0 6	0 31	0 6	0 14	0 27	0 2	0 16	0 6	0 3	0 14	0 11	0 8	0 22	0 21	0 7	0 8	0 16	0 5	0 17	0 24	0 7	0 0	0 0	0 1	0 12	0 14	0 12	0 7	0 12	0 14	0 10	0 10	0 14	0 14
tig00000650	1603837	AGCCT	GGCC	0 30	0 23	0 14	0 39	0 44	0 35	0 31	0 26	0 33	0 33	0 9	0 4	0 6	0 33	0 7	0 16	0 28	0 2	0 19	0 7	0 3	0 14	0 14	0 10	0 22	0 26	0 7	0 8	0 17	0 6	0 14	0 24	0 7	0 0	0 0	0 1	0 12	0 15	0 14	0 7	0 14	0 14	0 10	0 10	0 17	0 13
tig00000650	1603840	CT	C	0 30	0 23	0 14	0 39	0 44	0 35	0 31	0 26	0 33	0 33	0 9	0 4	0 6	0 33	0 7	0 16	0 28	0 2	0 19	0 7	0 3	0 14	0 14	0 10	0 22	0 26	0 7	0 8	0 17	0 6	0 14	0 24	0 7	0 0	0 0	0 1	0 12	0 15	0 14	0 7	0 14	0 14	0 10	0 10	0 17	0 13
tig00000650	1603857	T	G	0 35	0 35	0 18	0 45	0 50	0 51	0 40	0 37	0 41	0 37	0 11	0 6	0 8	0 45	0 9	0 24	0 33	0 5	0 23	0 8	0 6	0 16	0 17	0 13	0 26	0 32	0 11	0 12	0 18	0 9	0 17	0 25	0 7	0 0	0 0	0 4	0 18	0 19	0 24	6 6	14 3	0 19	11 3	4 14	12 11	0 21
tig00000650	1603871	TACACAGTC	CACACAGTA	0 16	0 15	0 18	0 43	0 38	0 42	0 39	0 38	0 44	0 33	0 10	0 5	0 7	0 23	0 5	0 13	0 27	0 5	0 15	0 8	0 4	0 10	0 0	0 5	0 31	0 22	0 6	0 10	0 8	0 1	0 0	0 0	0 0	0 0	0 0	0 0	0 0	0 0	0 0	0 0	0 0	0 0	0 0	0 0	0 0	0 0
tig00000650	1603871	TAC	T	0 16	0 15	0 18	0 43	0 38	0 42	0 39	0 38	0 44	0 33	0 10	0 5	0 7	0 23	0 5	0 13	0 27	0 5	0 15	0 8	0 4	0 10	0 0	0 5	0 31	0 22	0 6	0 10	0 8	0 1	0 0	0 0	0 0	0 0	0 0	5 0	0 0	0 0	0 0	0 0	0 0	0 0	0 0	0 0	0 0	0 0
tig00000650	1603873	CACAGTCTACCG	C	0 16	0 15	0 18	0 43	0 38	0 42	0 39	0 38	0 44	0 33	0 10	0 5	0 7	0 23	0 5	0 13	0 27	0 5	0 15	0 8	0 4	0 10	0 0	0 5	0 31	0 22	0 6	0 10	0 8	0 1	0 0	0 0	0 0	0 0	0 0	0 0	0 0	0 0	0 0	0 0	0 0	0 0	0 0	0 0	0 0	0 0
tig00000650	1603874	A	C	0 16	0 15	0 18	0 43	0 38	0 42	0 39	0 38	0 44	0 33	0 10	0 5	0 7	0 23	0 5	0 13	0 27	0 5	0 15	0 8	0 4	0 10	0 0	0 5	0 31	0 22	0 6	0 10	0 8	0 1	5 0	3 0	7 0	0 0	0 0	0 0	0 0	0 0	0 0	0 0	0 0	0 0	0 0	0 0	0 0	0 0
tig00000650	1603874	ACAGTCT	CCAGTCC	0 16	0 15	0 18	0 43	0 38	0 42	0 39	0 38	0 44	0 33	0 10	0 5	0 7	0 23	0 5	0 13	0 27	0 5	0 15	0 8	0 4	0 10	0 0	0 5	0 31	0 22	0 6	0 10	0 8	0 1	6 0	8 0	3 0	0 0	0 0	0 0	0 0	0 0	0 0	0 0	0 0	0 0	0 0	0 0	0 0	0 0
tig00000650	1603880	T	C	0 16	0 15	0 18	0 43	0 38	0 42	0 39	0 38	0 44	0 33	0 10	0 5	0 7	0 23	0 5	0 13	0 27	0 5	9 15	0 8	3 4	4 10	7 0	0 5	0 31	0 22	4 6	4 10	9 8	0 1	0 0	0 0	0 0	0 0	0 0	0 0	19 0	16 0	23 0	12 0	17 0	17 0	15 0	19 0	21 0	21 0
tig00000650	1603896	A	C	0 38	0 24	0 20	0 41	0 37	0 44	0 39	0 36	0 41	0 27	0 9	0 4	0 6	0 44	0 9	0 29	0 31	0 5	0 17	0 9	0 4	0 12	0 8	0 15	0 35	0 35	0 7	0 8	0 8	0 10	0 12	0 22	0 11	0 0	0 0	0 7	0 0	0 0	0 0	0 0	0 0	0 0	0 0	0 0	0 0	0 0
tig00000650	1603896	A	T	0 38	0 24	0 20	0 41	0 37	0 44	0 39	0 36	0 41	0 27	0 9	0 4	0 6	0 44	0 9	0 29	0 31	0 5	9 17	0 9	3 4	3 12	5 8	0 15	0 35	0 35	2 7	3 8	7 8	0 10	0 12	0 22	0 11	0 0	0 0	0 7	20 0	21 0	20 0	17 0	23 0	25 0	12 0	17 0	21 0	21 0
tig00000650	1603908	C	T	36 0	22 0	20 0	39 0	45 0	44 0	39 0	36 0	39 0	25 0	11 0	5 0	4 0	45 0	8 0	29 0	30 0	7 0	17 10	0 10	5 3	13 3	8 5	18 0	31 0	32 0	8 4	8 2	7 7	13 0	13 0	20 0	10 0	0 1	0 0	0 7	0 22	0 20	0 21	0 15	0 21	0 23	0 11	0 19	0 25	0 23
tig00000650	1603918	C	T	1 35	0 23	0 22	0 41	0 42	0 46	0 43	0 34	0 39	0 24	0 10	0 4	0 5	0 47	0 7	0 30	0 33	0 9	0 23	0 8	0 9	0 13	0 11	0 19	0 33	0 29	0 16	0 12	0 14	0 12	0 12	0 23	0 10	0 1	0 0	0 7	0 28	0 21	0 28	0 17	0 25	0 24	8 3	6 13	19 9	0 29
tig00000650	1603919	C	CCTTCAA	0 33	0 20	0 19	0 38	0 42	0 41	0 39	0 32	0 34	0 24	0 7	0 3	0 3	0 44	0 5	0 28	0 27	0 9	1 12	0 8	0 9	0 12	0 9	0 17	0 29	0 27	0 15	0 11	0 10	0 11	0 11	0 22	0 10	0 1	0 0	0 7	0 26	0 23	0 27	0 18	0 25	0 24	0 12	0 20	0 28	0 29
tig00000650	1603923	C	T	0 33	0 20	0 19	0 38	0 42	0 41	0 39	0 32	0 34	0 24	0 7	0 3	0 3	0 44	0 5	0 28	0 27	0 9	0 12	0 8	0 9	0 12	0 9	0 17	0 29	0 27	0 15	0 11	0 10	0 11	0 11	0 22	0 10	0 1	0 0	0 7	0 26	0 23	0 27	0 18	0 25	0 24	0 12	0 20	0 28	0 29
tig00000650	1603928	GCTTGTTT	G	0 25	0 15	0 17	0 27	0 41	0 30	0 33	0 25	0 29	0 19	0 5	0 3	0 2	0 36	0 4	0 23	0 21	0 7	0 9	0 7	0 7	0 10	0 9	0 12	0 29	0 21	0 14	0 8	0 9	0 8	0 12	0 25	0 10	0 1	0 0	0 7	0 27	0 18	0 26	0 19	0 28	0 21	0 13	0 21	0 24	0 31
tig00000650	1603929	C	T	0 25	0 15	0 17	0 27	0 41	0 30	0 33	0 25	0 29	0 19	0 5	0 3	0 2	0 36	0 4	0 23	0 21	0 7	0 9	0 7	0 7	0 10	0 9	0 12	0 29	0 21	0 14	0 8	0 9	0 8	0 12	0 25	0 10	0 1	0 0	0 7	0 27	0 18	0 26	0 19	0 28	0 21	0 13	0 21	0 24	0 31
tig00000650	1603930	T	A	0 25	0 15	0 17	0 27	0 41	0 30	0 33	0 25	0 29	0 19	0 5	0 3	0 2	0 36	0 4	0 23	0 21	0 7	0 9	0 7	0 7	0 10	0 9	0 12	0 29	0 21	0 14	0 8	0 9	0 8	0 12	0 25	0 10	0 1	0 0	0 7	0 27	0 18	0 26	0 19	0 28	0 21	0 13	0 21	0 24	0 31
tig00000650	1603932	GTTTCTTC	G	0 25	0 15	0 17	0 27	0 41	0 30	0 33	0 25	0 29	0 19	0 5	0 3	0 2	0 36	0 4	0 23	0 21	0 7	0 9	0 7	0 7	0 10	0 9	0 12	0 29	0 21	0 14	0 8	0 9	0 8	0 12	0 25	0 10	0 1	0 0	0 7	0 27	0 18	0 26	0 19	0 28	0 21	0 13	0 21	0 24	0 31
tig00000650	1603950	T	G	0 30	0 20	0 17	0 31	0 43	0 39	0 40	0 31	0 31	0 25	0 6	0 4	0 3	0 42	0 7	0 29	0 36	0 13	4 13	0 8	5 3	2 9	5 6	0 17	0 35	0 26	5 10	3 10	7 8	0 6	0 24	0 38	0 10	0 1	0 0	0 7	33 0	25 0	28 0	19 0	31 0	22 0	15 0	30 0	29 0	38 0
tig00000650	1603974	G	A	19 0	15 0	14 0	26 0	33 0	28 0	28 0	20 0	21 0	22 0	5 0	3 0	3 0	31 0	6 0	22 0	31 0	12 0	13 0	0 4	3 0	6 0	5 0	13 0	22 0	22 0	9 0	7 0	6 0	5 0	9 0	10 0	4 0	0 0	0 0	0 0	0 0	0 0	0 0	0 0	0 0	0 0	0 0	0 0	0 0	0 0
tig00000650	1603974	GTGTTGAG	A	0 0	0 0	0 0	0 0	0 0	0 0	0 0	0 0	0 0	0 0	0 0	0 0	0 0	0 0	0 0	0 0	0 0	0 0	0 0	0 4	0 0	0 0	0 0	0 0	0 0	0 0	0 0	0 0	0 0	0 0	0 0	0 0	0 0	1 0	0 0	7 0	0 0	0 0	0 0	0 0	0 0	0 0	0 0	0 0	0 0	0 0
tig00000650	1603974	GT	AC	0 0	0 0	0 0	0 0	0 0	0 0	0 0	0 0	0 0	0 0	0 0	0 0	0 0	0 0	0 0	0 0	0 0	0 0	0 0	0 4	0 0	0 0	0 0	0 0	0 0	0 0	0 0	0 0	0 0	0 0	11 0	23 0	5 0	0 0	0 0	0 0	0 0	0 0	0 0	0 0	0 0	0 0	0 0	0 0	0 0	0 0
tig00000650	1603974	GTGT	ATGA	0 0	0 0	0 0	0 0	0 0	0 0	0 0	0 0	0 0	0 0	0 0	0 0	0 0	0 0	0 0	0 0	0 0	0 0	0 0	0 4	2 0	2 0	3 0	0 0	0 0	0 0	5 0	2 0	5 0	0 0	0 0	0 0	0 0	0 0	0 0	0 0	30 0	22 0	24 0	17 0	25 0	20 0	11 0	25 0	18 0	31 0
tig00000650	1603974	G	C	0 0	0 0	0 0	0 0	0 0	0 0	0 0	0 0	0 0	0 0	0 0	0 0	0 0	0 0	0 0	0 0	0 0	0 0	0 0	0 4	0 0	0 0	0 0	0 0	0 0	0 0	0 0	0 0	0 0	0 0	0 0	0 0	0 0	0 0	0 0	0 0	0 0	0 0	0 0	0 0	0 0	0 0	0 0	0 0	0 0	0 0
tig00000650	1603982	T	C	0 25	0 19	0 15	0 32	0 35	0 31	0 37	0 22	0 22	0 28	0 7	0 3	0 7	0 34	0 5	0 28	0 32	0 12	8 8	0 4	0 3	0 7	0 5	0 14	0 30	0 22	0 9	0 10	0 8	0 7	0 30	0 35	0 10	0 1	0 0	0 7	0 0	0 0	0 0	0 0	0 0	0 0	0 0	0 0	0 0	0 0
tig00000650	1603982	TGTT	CGTC	0 25	0 19	0 15	0 32	0 35	0 31	0 37	0 22	0 22	0 28	0 7	0 3	0 7	0 34	0 5	0 28	0 32	0 12	0 8	0 4	2 3	2 7	3 5	0 14	0 30	0 22	8 9	4 10	5 8	0 7	0 30	0 35	0 10	0 1	0 0	0 7	33 0	24 0	31 0	25 0	23 0	23 0	13 0	25 0	21 0	35 0
tig00000650	1604000	A	T	0 22	9 8	0 13	0 26	0 25	0 23	0 27	0 20	0 19	0 26	0 6	0 3	0 7	0 32	0 4	0 26	0 29	0 12	0 18	0 4	0 5	0 11	0 9	0 14	0 26	0 15	0 15	0 15	0 14	0 5	0 30	0 32	0 10	0 1	0 0	0 7	0 39	0 25	0 30	0 27	0 26	0 22	0 15	0 25	0 24	0 34
tig00000650	1604004	T	A	0 22	0 14	0 12	0 22	0 19	0 22	0 25	0 20	0 18	0 25	0 5	0 3	0 7	0 30	0 3	0 24	1 27	0 11	0 18	0 4	0 5	0 10	0 8	0 11	0 23	0 14	0 16	0 15	0 15	0 4	0 27	0 31	0 10	1 0	0 0	7 0	0 35	0 27	0 29	0 25	0 23	0 25	0 14	0 19	0 24	0 32
tig00000650	1604025	A	T	12 0	11 0	4 0	12 0	10 0	15 0	13 0	11 0	8 0	15 0	4 0	2 0	5 0	14 0	0 0	16 0	18 0	5 0	4 10	0 6	1 2	3 4	3 4	7 0	16 0	8 0	1 8	6 4	6 6	3 0	18 0	14 0	5 5	0 0	0 0	7 0	0 37	0 30	0 27	0 26	0 22	0 18	0 13	0 21	0 24	0 32
tig00000650	1604031	T	G	10 0	8 0	4 0	11 0	8 0	13 0	12 0	10 0	6 0	12 0	4 0	1 0	4 0	11 0	0 0	14 0	16 0	0 0	12 0	0 6	2 0	6 0	6 0	5 0	13 0	8 0	8 0	9 0	10 0	3 0	14 0	11 0	10 0	0 0	0 0	7 0	38 0	30 0	27 0	25 0	21 0	17 0	13 0	21 0	23 0	32 0
tig00000650	1604042	G	T	0 3	0 7	0 3	0 6	0 7	0 7	0 7	0 6	0 1	0 9	0 3	0 1	0 4	0 6	0 0	0 8	0 8	0 0	0 11	0 7	0 1	0 6	0 3	0 4	0 10	0 9	0 7	0 8	0 7	0 3	0 10	0 6	0 10	0 0	0 0	7 0	0 38	0 28	0 29	0 27	0 21	0 16	0 13	0 21	0 25	0 30
tig00000650	1604048	GTTTT	ATTTTC	0 0	0 0	0 0	0 0	0 0	0 0	0 0	0 0	0 0	0 0	0 0	0 0	0 1	0 0	0 0	0 0	0 0	0 0	0 0	0 7	0 0	0 0	0 0	0 0	0 0	0 0	0 0	0 0	0 0	0 0	0 0	0 0	0 0	0 0	0 0	0 0	32 0	22 0	22 0	8 0	6 0	10 0	9 0	0 0	0 0	12 0
tig00000650	1604048	GT	G	0 0	0 0	0 0	0 0	0 0	0 0	0 0	0 0	0 0	0 0	0 0	0 0	0 1	0 0	0 0	0 0	0 0	0 0	0 0	0 7	0 0	0 0	0 0	0 0	0 0	0 0	0 0	0 0	0 0	0 0	0 0	0 0	0 0	0 0	0 0	0 0	0 0	0 0	0 0	0 0	0 0	0 0	0 0	0 0	0 0	0 0
tig00000650	1604048	G	GT	0 0	0 0	0 0	1 0	0 0	1 0	0 0	2 0	0 0	1 0	0 0	0 0	0 1	1 0	0 0	0 0	0 0	0 0	0 0	0 7	0 0	0 0	0 0	0 0	2 0	2 0	0 0	0 0	0 0	0 0	1 0	1 0	9 0	0 0	0 0	5 0	0 0	0 0	0 0	0 0	0 0	0 0	0 0	0 0	0 0	0 0
tig00000650	1604048	G	GTT	0 0	0 0	0 0	0 0	0 0	0 0	0 0	0 0	0 0	0 0	0 0	0 0	0 1	0 0	0 0	0 0	0 0	0 0	0 0	0 7	0 0	0 0	0 0	0 0	0 0	0 0	0 0	0 0	0 0	0 0	0 0	0 0	0 0	0 0	0 0	0 0	0 0	0 0	0 0	0 0	0 0	0 0	0 0	0 0	0 0	0 0
tig00000650	1604048	G	GTTT	0 0	0 0	0 0	0 0	0 0	0 0	0 0	0 0	0 0	0 0	0 0	0 0	0 1	0 0	0 0	0 0	0 0	0 0	0 0	0 7	0 0	0 0	0 0	0 0	0 0	0 0	0 0	0 0	0 0	0 0	0 0	0 0	0 0	0 0	0 0	0 0	0 0	0 0	0 0	0 0	0 0	0 0	0 0	0 0	0 0	0 0
tig00000650	1604052	T	TC	0 0	0 0	0 0	0 0	0 0	0 0	0 0	0 0	0 0	0 0	0 0	0 0	0 1	0 0	0 0	0 0	0 0	0 0	5 0	0 7	1 0	1 0	2 0	0 0	0 0	0 0	1 0	1 0	0 0	0 0	0 0	0 0	0 0	0 0	0 0	0 0	0 0	0 0	0 0	16 0	10 0	4 0	3 0	15 0	20 0	16 0
tig00000650	1604055	TTG	CTTT	0 0	0 0	0 0	0 0	0 0	0 0	0 0	0 0	0 0	0 0	0 0	0 0	0 1	0 0	0 0	0 0	0 0	0 0	0 0	0 7	0 0	0 0	0 0	0 0	0 0	0 0	0 0	0 0	0 0	0 0	0 0	0 0	0 0	0 0	0 0	0 0	0 0	0 0	0 0	0 0	0 0	0 0	0 0	0 0	0 0	0 0
tig00000650	1604067	T	TTAAATACTAAA	0 0	0 0	0 0	0 0	0 0	0 0	0 0	0 0	0 0	0 0	0 0	0 0	0 0	0 0	0 0	0 2	0 0	0 0	0 5	0 10	0 1	0 1	0 2	0 0	0 0	0 4	0 3	0 1	0 1	0 0	0 3	0 1	0 12	0 0	0 0	0 7	0 28	0 24	0 21	0 24	0 15	0 13	0 13	0 15	0 25	0 26
tig00000650	1604072	T	G	0 0	0 0	0 0	0 0	0 0	0 0	0 0	0 0	0 0	0 0	0 0	0 0	0 1	0 0	0 0	0 2	0 0	0 0	0 4	0 10	0 1	0 1	0 2	0 0	0 0	0 4	0 3	0 1	0 1	0 0	0 3	0 1	4 8	0 0	0 0	0 6	0 23	0 24	0 21	0 23	0 17	0 12	0 12	0 15	0 25	0 21
tig00000650	1604074	G	C	0 0	0 0	0 0	0 0	0 0	0 0	0 0	0 0	0 0	0 0	0 0	0 0	0 0	0 0	0 0	0 2	0 0	0 0	0 4	0 10	0 1	0 1	0 2	0 0	0 0	0 4	0 3	0 1	0 1	0 0	0 3	0 1	0 12	0 0	0 0	7 0	0 23	0 24	0 21	0 22	0 15	0 13	0 12	0 14	0 24	0 22
tig00000650	1604076	T	C	0 0	0 0	0 0	0 0	0 0	0 0	0 0	0 0	0 0	0 0	0 0	0 0	0 0	0 0	0 0	0 2	0 0	0 0	0 4	0 10	0 1	0 1	0 2	0 0	0 0	0 4	0 3	0 1	0 1	0 0	0 3	0 1	0 11	0 0	0 0	0 7	0 24	0 24	0 21	0 22	0 15	0 13	0 12	0 14	0 25	0 22
tig00000650	1604084	T	C	0 0	0 0	0 0	0 0	0 0	0 0	0 0	0 0	0 0	0 0	0 0	0 0	0 0	0 0	0 0	0 2	0 0	0 0	4 0	0 11	0 0	1 0	2 0	0 0	0 0	0 4	3 0	0 0	1 0	0 0	1 2	1 0	11 0	0 0	0 0	2 0	26 1	24 0	18 0	21 0	15 0	11 0	10 0	6 0	29 0	18 0
tig00000650	1604104	G	C	0 0	0 0	0 0	0 0	0 0	0 0	0 0	0 0	0 0	0 0	0 0	0 0	0 0	0 0	0 0	0 1	0 0	0 0	0 0	0 13	0 0	0 0	0 0	0 0	0 0	0 4	0 0	0 0	0 0	0 0	0 3	0 1	0 13	0 0	0 0	0 1	0 24	0 20	0 18	0 14	0 12	0 15	0 9	0 5	0 26	0 16
tig00000650	1604111	T	A	0 0	0 0	0 0	0 0	0 0	0 0	0 0	0 0	0 0	0 0	0 0	0 0	0 0	0 0	0 0	0 1	0 0	0 0	0 0	0 12	0 0	0 0	0 0	0 0	0 0	0 4	0 0	0 0	0 0	0 0	0 3	0 1	0 13	0 0	0 0	0 1	0 23	0 20	0 16	0 15	0 12	0 14	0 9	0 5	0 28	0 16
tig00000650	1604118	A	G	0 0	0 0	0 0	0 0	0 0	0 0	0 0	0 0	0 0	0 0	0 0	0 0	0 0	0 0	0 0	0 1	0 0	0 0	0 0	0 12	0 0	0 0	0 0	0 0	0 0	0 4	0 0	0 0	0 0	0 0	0 3	0 1	0 12	0 0	0 0	0 1	0 22	0 19	0 14	10 3	0 12	0 13	0 9	0 5	0 27	0 18
tig00000650	1604127	G	C	0 0	0 0	0 0	0 0	0 0	0 0	0 0	0 0	0 0	0 0	0 0	0 0	0 0	0 0	0 0	0 1	0 0	0 0	0 0	0 13	0 0	0 0	0 0	0 0	0 0	0 4	0 0	0 0	0 0	0 0	1 1	0 0	0 12	0 0	0 0	0 1	0 23	0 19	0 12	0 14	0 10	0 15	0 5	0 5	0 25	0 17
tig00000650	1604137	GTTT	ATCA	0 0	0 0	0 0	0 0	0 0	0 0	0 0	0 0	0 0	0 0	0 0	0 0	0 0	0 0	0 0	0 0	0 0	0 0	0 0	0 13	0 0	0 0	0 0	0 0	0 0	0 0	0 0	0 0	0 0	0 0	0 0	0 0	8 3	0 0	0 0	0 0	0 0	0 0	0 0	0 0	0 0	0 0	0 0	0 0	0 0	0 0
tig00000650	1604139	TT	CA	0 0	0 0	0 0	0 0	0 0	0 0	0 0	0 0	0 0	0 0	0 0	0 0	0 0	0 0	0 0	0 0	0 0	0 0	0 0	0 13	0 0	0 0	0 0	0 0	0 0	0 0	0 0	0 0	0 0	0 0	0 0	1 0	0 3	0 0	0 0	0 0	19 0	17 0	11 0	13 0	11 0	15 0	4 0	5 0	22 0	16 0
tig00000650	1604172	TCAAC	CCAAT	0 0	0 0	0 0	0 0	0 0	0 0	0 0	0 0	0 0	0 0	0 0	0 0	0 0	0 0	0 0	0 0	0 0	0 0	0 0	0 7	0 0	0 0	0 0	0 0	0 0	0 0	0 0	0 0	0 0	0 0	0 0	0 0	0 3	0 0	0 0	0 0	0 0	0 0	0 0	3 0	0 0	0 0	0 0	0 0	10 0	0 0
tig00000650	1604176	C	T	7 0	6 0	2 0	11 0	17 0	16 0	17 0	11 0	10 0	14 0	5 0	0 0	1 0	11 0	2 0	2 0	13 0	1 0	4 0	0 7	0 0	3 0	0 0	4 0	11 0	3 0	4 0	3 0	1 0	5 0	9 0	10 0	10 3	0 0	0 0	0 0	18 0	18 0	19 0	7 0	11 0	18 0	2 0	2 0	8 0	14 0
tig00000650	1604176	CG	TA	0 0	0 0	0 0	0 0	0 0	0 0	0 0	0 0	0 0	0 0	0 0	0 0	0 0	0 0	0 0	0 0	0 0	0 0	0 0	0 7	0 0	0 0	0 0	0 0	0 0	0 0	0 0	0 0	0 0	0 0	0 0	0 0	0 3	0 0	0 0	0 0	0 0	0 0	0 0	0 0	0 0	0 0	0 0	0 0	0 0	0 0
tig00000650	1604183	G	A	0 8	0 8	0 2	0 13	0 21	0 19	0 22	0 15	0 14	0 18	0 7	0 0	0 1	0 14	0 2	0 3	0 14	0 2	0 4	0 8	0 1	0 3	0 0	0 6	0 14	0 4	0 5	0 3	0 1	0 5	0 12	0 12	0 15	0 0	0 0	0 0	0 23	0 21	0 20	0 11	0 14	0 18	0 2	0 4	0 20	0 17
tig00000650	1604185	A	T	4 4	5 4	0 2	0 14	0 21	0 19	0 22	0 16	0 14	0 18	0 7	0 0	0 0	0 14	0 4	0 4	0 14	0 2	0 4	0 8	0 1	0 3	0 0	0 6	0 15	0 4	0 5	0 3	0 1	3 2	0 11	3 10	0 14	0 0	0 0	0 0	0 23	0 20	0 21	0 9	0 14	0 18	0 2	0 4	0 20	0 18
tig00000650	1604199	A	G	0 10	0 12	0 2	0 17	0 22	0 24	0 27	0 20	0 15	0 20	0 7	0 1	0 1	0 26	0 5	0 12	0 16	0 2	0 5	0 7	0 1	0 3	0 0	0 8	0 20	0 10	0 5	0 6	0 2	0 6	0 14	0 16	0 14	0 0	0 0	0 0	0 25	0 21	0 21	0 10	0 15	0 21	0 2	0 5	0 24	0 19
tig00000650	1604206	A	G	0 14	0 12	0 2	0 17	0 24	0 25	0 30	0 22	0 17	0 23	0 9	0 1	0 2	0 27	0 5	0 14	1 21	0 2	0 8	0 6	0 1	0 4	0 0	0 8	0 21	0 10	0 6	0 7	0 2	0 6	0 15	0 17	0 14	0 0	0 0	0 0	0 26	0 21	0 22	0 10	0 15	0 22	0 3	0 5	0 22	0 19
tig00000650	1604209	G	T	0 14	0 13	0 2	0 17	0 24	0 25	0 31	0 21	0 16	0 23	0 9	0 1	0 2	0 27	0 5	0 16	0 22	0 2	0 9	0 6	0 1	0 5	0 0	0 9	0 23	0 10	0 6	0 7	0 2	0 6	0 15	0 17	0 14	0 0	0 0	0 0	0 26	0 22	0 22	0 10	0 16	0 20	0 4	0 5	0 22	0 19
tig00000650	1604224	T	G	0 19	0 12	0 3	0 20	0 29	0 27	0 31	0 24	0 18	0 23	0 9	0 1	0 2	0 30	0 7	0 20	0 28	0 5	0 11	0 7	0 2	0 7	0 0	0 11	0 28	0 11	0 7	0 7	0 3	0 6	0 19	0 18	0 15	0 1	0 0	0 0	0 27	0 22	0 24	0 11	0 14	0 24	0 4	0 4	0 21	0 17
tig00000650	1604225	T	C	0 19	0 14	0 3	0 20	0 29	0 29	0 32	0 24	0 18	0 23	0 9	0 1	0 2	0 31	0 7	0 20	0 28	0 5	0 10	0 7	0 2	0 7	0 1	0 12	0 28	0 12	0 7	0 8	0 3	0 6	0 18	0 18	0 15	0 1	0 0	0 0	0 26	0 22	0 24	0 10	0 14	0 24	0 5	0 4	0 22	0 17
tig00000650	1604236	A	T	0 20	0 16	0 3	0 20	0 30	0 33	0 34	0 26	0 20	0 23	0 9	0 2	0 3	0 32	3 4	0 22	0 29	0 5	0 11	0 6	0 2	0 7	0 1	0 14	0 27	0 14	0 7	0 8	0 3	0 8	0 18	0 20	0 15	1 0	0 0	0 0	0 23	0 24	0 22	4 7	0 15	0 27	0 5	0 4	2 12	0 15
tig00000650	1604239	T	A	0 20	0 16	0 3	0 20	0 29	0 33	0 33	0 27	0 20	0 23	0 7	0 2	0 2	0 32	0 7	0 22	0 29	0 6	0 11	0 6	0 2	0 8	0 1	0 15	0 27	0 14	0 7	0 8	0 3	0 8	0 17	0 20	0 15	0 1	0 0	0 0	0 20	0 25	0 21	0 11	0 14	0 26	0 4	0 4	0 13	0 16
tig00000650	1604247	T	TA	0 15	0 12	0 2	0 11	0 15	0 19	0 17	0 19	0 13	0 10	0 0	0 3	0 2	0 8	0 2	0 12	0 18	0 3	0 8	0 5	0 2	0 5	0 1	0 15	0 19	0 4	0 0	0 0	0 0	0 5	0 6	0 15	0 13	0 0	0 0	0 0	0 0	0 0	0 0	0 0	0 0	0 0	0 0	0 0	0 0	0 0
tig00000650	1604248	AAAAAAA	TAAAAAAT	0 15	0 12	0 2	0 11	0 15	0 19	0 17	0 19	0 13	0 10	0 0	0 3	0 2	0 8	0 2	0 12	0 18	0 3	0 8	0 5	0 2	0 5	0 1	0 15	0 19	0 4	0 0	0 0	0 0	0 5	0 6	0 15	0 13	0 0	0 0	0 0	0 0	0 0	0 0	0 0	0 0	0 0	0 0	0 0	0 0	0 0
tig00000650	1604254	A	AT	0 15	0 12	0 2	0 11	0 15	0 19	0 17	0 19	0 13	0 10	0 0	0 3	0 2	0 8	0 2	0 12	0 18	0 3	0 8	0 5	0 2	0 5	0 1	0 15	0 19	0 4	0 0	0 0	0 0	0 5	0 6	0 15	0 13	1 0	0 0	0 0	0 0	0 0	0 0	2 0	0 0	0 0	0 0	0 0	1 0	0 0
tig00000650	1604254	AAAC	GAAA	0 15	0 12	0 2	0 11	0 15	0 19	0 17	0 19	0 13	0 10	3 0	0 3	0 2	12 8	3 2	7 12	0 18	2 3	0 8	0 5	0 2	0 5	0 1	0 15	0 19	7 4	6 0	6 0	3 0	2 5	0 6	0 15	0 13	0 0	0 0	0 0	24 0	18 0	20 0	8 0	14 0	21 0	4 0	5 0	11 0	11 0
tig00000650	1604257	C	AA	0 15	0 12	0 2	0 11	0 15	0 19	0 17	0 19	0 13	0 10	0 0	0 3	0 2	0 8	0 2	0 12	0 18	0 3	0 8	0 5	0 2	0 5	0 1	0 15	0 19	0 4	0 0	0 0	0 0	0 5	5 6	0 15	0 13	0 0	0 0	0 0	0 0	0 0	0 0	0 0	0 0	0 0	0 0	0 0	0 0	0 0
tig00000650	1604270	AGG	A	9 8	6 5	1 0	14 0	13 0	9 0	13 0	16 0	12 0	9 0	0 5	3 0	5 0	2 13	2 3	13 5	18 0	2 2	8 0	0 7	2 0	5 0	0 2	6 12	16 0	3 10	0 2	0 7	0 7	0 9	0 9	0 14	0 13	0 1	0 0	0 0	0 22	0 17	0 20	0 9	0 13	0 10	0 4	0 4	0 12	0 9
tig00000650	1604272	GGAAT	AA	0 8	0 5	0 0	0 0	0 0	8 0	0 0	0 0	0 0	0 0	0 5	0 0	0 0	0 13	0 3	0 5	0 0	0 2	0 0	0 7	0 0	0 0	0 2	0 12	0 0	0 10	0 2	0 7	0 7	0 9	0 9	0 14	0 13	0 1	0 0	0 0	0 22	0 17	0 20	0 9	0 13	0 10	0 4	0 4	0 12	0 9
tig00000650	1604275	A	G	0 8	0 5	0 0	0 0	0 0	0 0	0 0	0 0	0 0	0 0	0 5	0 0	0 0	0 13	0 3	0 5	0 0	0 2	0 0	0 7	0 0	0 0	0 2	0 12	0 0	0 10	0 2	0 7	0 7	0 9	0 9	0 14	0 13	0 1	0 0	0 0	0 22	0 17	0 20	0 9	0 13	9 10	0 4	0 4	0 12	0 9
tig00000650	1604276	TT	C	0 8	0 5	0 0	0 0	0 0	0 0	0 0	0 0	0 0	0 0	0 5	0 0	0 0	0 13	0 3	0 5	0 0	0 2	0 0	0 7	0 0	0 0	0 2	0 12	0 0	0 10	0 2	0 7	0 7	0 9	7 9	0 14	0 13	0 1	0 0	0 0	0 22	0 17	0 20	0 9	0 13	0 10	0 4	0 4	0 12	0 9
tig00000650	1604282	T	A	10 7	7 3	2 0	20 0	13 0	19 0	16 0	17 0	12 0	11 0	1 5	4 0	6 0	3 11	2 3	13 7	19 0	2 2	8 0	0 6	4 0	5 0	0 4	6 11	20 0	4 12	0 3	0 9	0 7	0 10	0 15	0 14	0 13	0 1	0 0	0 0	0 22	0 16	0 20	0 8	0 12	0 20	0 4	0 4	0 12	0 10
tig00000650	1604283	A	G	0 17	0 10	0 2	0 20	0 13	0 19	0 15	0 15	0 12	0 11	0 6	0 4	0 6	0 14	0 5	0 18	0 19	0 4	0 8	0 7	0 4	0 5	0 4	0 17	0 20	0 16	0 3	0 9	0 7	0 10	0 15	0 14	0 13	0 0	0 0	0 0	0 21	0 17	0 20	0 7	0 12	0 20	0 4	0 4	0 12	0 10
tig00000650	1604290	C	G	0 16	0 9	0 2	0 19	0 12	0 17	0 16	0 14	0 9	0 14	0 6	0 4	0 6	0 14	0 3	0 18	0 19	0 3	0 8	0 7	0 5	0 5	0 5	0 16	0 19	0 14	0 5	0 7	0 7	0 11	0 15	0 17	0 13	0 1	0 0	0 0	0 17	0 12	0 17	0 8	0 11	0 20	0 4	0 3	0 12	0 8
tig00000650	1604298	T	C	0 15	0 7	0 2	0 19	0 11	0 17	0 16	0 13	0 11	0 16	0 6	0 4	0 8	0 10	0 2	0 16	0 19	0 4	0 8	0 8	0 6	0 5	0 5	0 15	0 15	0 13	0 5	0 6	0 6	0 10	0 15	0 17	0 12	0 1	0 0	0 0	0 16	0 11	0 15	0 8	0 8	0 16	0 4	0 3	0 11	0 8
tig00000650	1604300	G	T	7 8	2 4	0 2	0 18	0 11	0 16	0 16	0 13	0 11	0 15	0 5	0 4	0 9	0 10	0 2	0 14	0 20	0 4	0 8	0 9	0 6	0 5	0 5	0 15	0 16	0 13	0 5	0 6	0 6	0 10	0 14	0 17	0 12	0 1	0 0	0 0	0 15	0 12	0 15	0 8	0 8	0 16	0 4	0 3	0 9	0 8
tig00000650	1604306	GC	G	0 12	0 7	0 2	0 19	0 9	0 13	0 13	0 12	0 8	0 13	0 4	0 3	0 8	0 11	0 2	0 13	0 15	0 2	0 2	0 8	0 6	0 3	0 5	0 12	0 13	0 13	0 3	0 5	0 4	0 10	0 11	0 11	0 10	0 1	0 0	0 0	0 13	0 8	0 10	0 7	0 8	0 16	0 4	0 3	0 9	0 6
tig00000650	1604309	C	G	0 12	0 7	0 2	0 19	0 9	0 13	0 13	0 12	1 8	0 13	0 4	0 3	0 8	0 11	0 2	0 13	0 15	0 2	0 2	0 8	0 6	0 3	0 5	1 12	0 13	0 13	0 3	0 5	0 4	0 10	0 11	5 11	0 10	0 1	0 0	0 0	0 13	0 8	0 10	0 7	0 8	0 16	0 4	0 3	0 9	0 6
tig00000650	1604330	C	CT	0 6	0 5	0 1	0 16	0 5	0 6	0 11	0 9	0 6	0 12	0 3	0 2	0 9	0 7	0 0	0 9	0 10	0 0	0 2	0 10	0 5	0 1	0 4	0 6	0 10	0 9	0 3	0 5	0 4	0 7	2 0	0 15	0 8	0 0	0 0	0 0	0 11	0 6	0 4	0 5	0 4	0 4	0 4	0 1	0 6	0 1
tig00000650	1604337	AAATC	TAAATT	0 6	0 5	0 1	0 16	0 5	0 6	0 11	0 9	0 6	0 12	0 3	0 2	0 9	0 7	0 0	0 9	0 10	0 0	0 2	0 10	0 5	0 1	0 4	0 6	0 10	0 9	0 3	0 5	0 4	0 7	0 0	0 15	0 8	0 0	0 0	0 0	0 11	0 6	0 4	0 5	0 4	0 4	0 4	0 1	0 6	0 1
tig00000650	1604337	AAATC	TTTTAAATT	0 6	0 5	0 1	0 16	0 5	0 6	0 11	0 9	0 6	0 12	0 3	0 2	0 9	0 7	0 0	0 9	0 10	0 0	0 2	0 10	0 5	0 1	0 4	0 6	0 10	0 9	0 3	0 5	0 4	0 7	0 0	0 15	0 8	0 0	0 0	0 0	0 11	0 6	0 4	0 5	0 4	0 4	0 4	0 1	0 6	0 1
tig00000650	1604341	C	A	0 6	0 5	0 1	0 16	0 5	0 6	0 11	0 9	1 6	0 12	0 3	0 2	0 9	0 7	0 0	0 9	0 10	0 0	0 2	0 10	0 5	0 1	0 4	0 6	0 10	0 9	0 3	0 5	0 4	0 7	0 0	0 15	0 8	0 0	0 0	0 0	0 11	0 6	0 4	0 5	0 4	6 4	0 4	0 1	1 6	0 1
tig00000650	1604345	G	T	0 6	0 3	0 1	0 17	0 4	0 7	0 10	0 9	0 6	0 12	0 3	0 1	0 9	0 7	0 0	0 10	0 9	0 0	0 2	0 9	0 4	0 1	0 4	0 3	0 9	0 9	0 3	0 3	0 4	0 7	0 9	0 14	0 7	0 0	0 0	0 0	0 10	0 6	0 4	0 3	0 3	0 10	0 4	0 1	0 6	0 1
tig00000650	1604352	A	C	0 4	0 4	0 1	0 18	0 4	0 8	0 10	0 10	0 8	0 12	0 2	0 2	0 9	0 6	0 0	0 9	0 8	0 0	0 2	0 7	0 4	0 1	0 3	0 1	0 9	0 6	0 3	0 3	0 3	0 6	0 9	0 14	0 7	0 0	0 0	0 0	0 9	0 6	0 3	0 3	0 3	0 8	0 3	0 1	0 4	0 1
tig00000650	1604354	ATA	GTG	0 2	0 3	0 1	0 17	0 3	0 9	0 9	0 10	0 9	0 12	0 2	0 2	0 7	0 6	0 0	0 8	0 8	0 0	0 2	0 7	0 4	0 1	0 3	0 1	0 9	0 6	0 3	0 3	0 3	0 6	0 7	0 13	0 6	0 0	0 0	0 0	0 8	0 5	0 2	0 2	0 1	0 7	0 3	0 1	0 3	0 1
tig00000650	1604356	A	G	0 2	0 3	0 1	0 17	0 3	0 9	0 9	0 10	0 9	0 12	0 2	0 2	0 7	0 6	0 0	0 8	0 8	0 0	0 2	0 7	0 4	0 1	0 3	0 1	0 9	0 6	0 3	0 3	0 3	0 6	0 7	0 13	0 6	0 0	0 0	0 0	0 8	0 5	0 2	0 2	0 1	0 7	0 3	0 1	0 3	0 1
tig00000650	1604358	T	A	0 2	0 3	0 0	0 17	0 3	0 9	0 9	0 10	0 9	0 12	0 1	0 2	0 7	0 6	0 0	0 8	0 8	0 0	0 1	0 7	0 4	0 1	0 3	0 1	0 9	0 6	0 3	0 2	0 3	0 6	0 7	0 14	0 6	0 0	0 0	0 0	8 0	5 0	2 0	2 0	0 0	6 0	2 0	1 0	3 0	1 0
tig00000650	1604368	C	T	0 2	0 3	0 0	0 11	0 2	0 6	0 7	0 8	0 7	0 10	0 0	0 2	0 6	0 4	0 0	0 6	0 8	0 0	0 1	0 9	0 3	0 1	0 3	0 0	0 8	0 5	0 3	0 2	0 2	0 3	0 6	0 12	0 6	0 0	0 0	0 0	0 6	0 4	0 0	0 2	0 0	0 5	0 2	0 1	0 0	0 1
tig00000650	1604371	CA	TT	0 0	0 0	0 0	0 0	0 0	0 0	0 0	0 0	0 0	0 0	0 0	0 0	0 0	0 2	0 0	0 2	0 0	0 0	0 0	0 9	0 0	0 0	0 0	0 0	0 0	0 2	0 3	0 2	0 0	0 0	3 3	5 6	0 0	0 0	0 0	0 0	0 0	0 0	0 0	0 0	0 0	0 0	0 0	0 0	0 0	0 0
tig00000650	1604372	A	G	2 0	3 0	0 0	10 0	2 0	6 0	7 0	8 0	6 0	10 0	0 0	2 0	5 0	2 2	0 0	4 2	8 0	0 0	1 0	0 9	3 0	1 0	0 0	0 0	8 0	2 2	0 3	0 2	0 0	0 0	0 3	0 6	0 0	0 0	0 0	0 0	5 0	4 0	0 0	2 0	0 0	2 0	2 0	1 0	0 0	1 0
tig00000650	1604372	A	T	0 0	0 0	0 0	0 0	0 0	0 0	0 0	0 0	0 0	0 0	0 0	0 0	0 0	0 2	0 0	0 2	0 0	0 0	0 0	0 9	0 0	0 0	2 0	0 0	0 0	0 2	0 3	0 2	0 0	1 0	0 3	0 6	6 0	0 0	0 0	0 0	0 0	0 0	0 0	0 0	0 0	0 0	0 0	0 0	0 0	0 0
tig00000650	1604374	C	T	0 2	0 3	0 0	0 10	0 2	0 6	0 7	0 8	0 5	0 10	0 0	0 2	0 5	0 4	0 0	0 6	0 8	0 0	0 1	0 9	0 3	0 1	0 2	0 0	0 8	0 4	0 3	0 2	0 0	0 1	3 3	0 11	0 6	0 0	0 0	0 0	0 5	0 3	0 0	1 0	0 0	0 2	0 2	0 1	0 0	0 1
tig00000650	1604376	T	G	0 2	0 3	0 0	0 9	0 2	0 6	0 7	0 7	0 6	0 9	0 0	0 1	0 5	0 4	0 0	0 5	0 7	0 0	0 1	0 9	0 2	0 1	0 2	0 0	0 8	0 3	0 3	0 1	0 0	0 1	0 5	5 5	0 5	0 0	0 0	0 0	0 5	0 1	0 0	0 1	0 0	0 2	0 0	0 1	0 0	0 1
tig00000650	1604381	T	G	0 1	0 2	0 0	0 6	0 2	0 6	0 7	0 6	0 6	0 8	0 0	0 1	0 5	0 2	0 0	0 5	0 7	0 0	0 1	0 9	0 2	0 1	0 1	0 0	0 5	0 2	0 2	0 0	0 0	0 1	0 5	0 9	0 5	0 0	0 0	0 0	5 0	1 0	0 0	1 0	0 0	2 0	0 0	1 0	0 0	1 0
tig00000650	1604383	C	T	1 0	2 0	0 0	5 0	2 0	6 0	7 0	6 0	6 0	8 0	0 0	1 0	5 0	2 0	0 0	4 1	7 0	0 0	1 0	0 9	1 0	1 0	0 1	0 0	4 0	2 0	0 2	0 0	0 0	0 1	3 1	5 4	0 5	0 0	0 0	0 0	0 5	0 0	0 0	0 1	0 0	0 2	0 0	0 1	0 0	0 1
tig00000650	1604390	C	CAAGAAATTGTAA	0 0	0 0	0 0	2 0	0 0	4 0	3 0	1 0	2 0	1 0	0 0	1 0	0 0	0 0	0 0	0 0	0 0	0 0	1 0	0 9	0 0	0 0	0 0	0 0	0 0	0 0	0 0	0 0	0 0	0 0	0 0	0 0	0 0	0 0	0 0	0 0	0 0	0 0	0 0	0 0	0 0	0 0	0 0	0 0	0 0	0 0
tig00000650	1604390	C	CAAGAAATTGTTTAAA	0 0	0 0	0 0	0 0	0 0	0 0	0 0	0 0	0 0	0 0	0 0	0 0	0 0	0 0	0 0	0 0	0 0	0 0	0 0	0 9	0 0	0 0	0 0	0 0	0 0	0 0	0 0	0 0	0 0	0 0	0 0	0 0	4 0	0 0	0 0	0 0	0 0	0 0	0 0	0 0	0 0	0 0	0 0	0 0	0 0	0 0
tig00000650	1604395	G	C	0 2	0 0	0 0	0 2	0 0	0 4	0 3	0 1	0 3	0 1	0 2	0 1	0 0	0 6	0 0	0 2	0 0	0 0	0 2	0 9	0 0	0 0	0 2	0 1	0 1	0 3	0 3	0 0	0 2	0 2	0 0	0 1	0 4	0 0	0 0	0 0	0 1	0 1	0 0	0 0	0 0	0 2	0 1	0 5	0 2	0 0
tig00000650	1604398	A	C	0 2	0 0	0 0	0 2	0 0	0 4	0 3	0 1	0 3	0 1	0 2	0 1	0 0	0 6	0 0	0 2	0 0	0 0	0 2	0 9	0 0	0 0	0 2	0 1	0 1	0 3	0 3	0 0	0 2	0 4	0 0	0 1	0 4	0 0	0 0	0 0	0 1	0 1	0 1	0 0	0 0	0 2	0 1	0 5	0 2	0 0
tig00000650	1604400	A	T	0 2	0 0	0 0	0 2	0 0	0 4	0 3	0 1	0 3	0 1	0 2	0 1	0 0	0 6	0 0	0 2	0 0	0 0	0 2	0 9	0 0	0 0	0 2	0 1	0 1	0 3	0 4	0 0	0 3	0 4	0 0	0 1	0 4	0 0	0 0	0 0	0 1	0 1	0 1	0 0	0 0	0 2	0 1	0 5	0 2	0 0
tig00000650	1604407	C	T	0 2	0 0	0 0	2 0	0 0	4 0	3 0	1 0	3 0	1 0	0 2	1 0	0 0	0 8	0 0	0 2	0 0	0 0	1 1	0 8	0 0	0 0	0 2	0 2	1 0	1 3	0 4	0 0	0 4	0 5	0 0	0 2	0 4	0 0	0 0	0 0	0 1	0 0	0 1	0 0	0 0	0 2	0 1	0 5	0 2	0 0
tig00000650	1604408	G	A	0 2	0 0	0 0	0 2	0 0	0 4	0 3	0 1	0 3	0 1	2 0	0 1	0 0	8 0	0 0	2 0	0 0	0 0	0 2	0 7	0 0	0 0	0 2	0 2	0 1	3 1	4 0	0 0	4 0	4 1	0 0	0 2	0 4	0 0	0 0	0 0	0 1	0 1	0 1	0 0	0 0	0 2	0 1	0 5	0 2	0 0
tig00000650	1604408	G	C	0 2	0 0	0 0	0 2	0 0	0 4	0 3	0 1	0 3	0 1	0 0	0 1	0 0	0 0	0 0	0 0	0 0	0 0	0 2	0 7	0 0	0 0	0 2	0 2	0 1	0 1	0 0	0 0	0 0	0 1	0 0	0 2	0 4	0 0	0 0	0 0	0 1	0 1	0 1	0 0	0 0	0 2	0 1	0 5	0 2	0 0
tig00000650	1604411	T	C	0 2	0 0	0 0	0 2	0 0	0 4	0 3	0 1	0 3	0 1	0 2	0 1	0 0	0 8	0 0	0 2	0 0	0 0	0 2	0 7	0 0	0 0	0 2	0 2	0 1	0 4	0 4	0 0	0 4	0 6	0 0	0 2	0 4	0 0	0 0	0 0	0 1	0 1	0 1	0 0	0 0	0 2	0 3	0 5	0 2	0 1
tig00000650	1604420	G	A	0 2	0 0	0 0	2 0	0 0	4 0	3 0	1 0	3 0	1 0	0 2	1 0	0 0	8 0	0 0	2 0	0 0	0 0	1 1	0 6	0 0	0 0	0 2	0 2	1 0	4 0	0 4	0 0	0 4	0 6	0 0	0 1	0 4	0 0	0 0	0 0	0 1	0 1	0 1	0 0	0 0	0 2	0 3	0 10	0 2	0 1
tig00000650	1604426	G	A	0 2	0 0	0 0	2 0	0 0	4 0	3 0	1 0	3 0	1 0	0 2	1 0	0 0	0 8	0 0	0 2	0 0	0 0	1 1	0 6	0 0	0 0	0 2	0 2	1 0	1 3	0 4	0 0	0 4	0 6	0 0	1 1	0 4	0 0	0 0	0 0	0 1	0 1	0 1	0 0	0 1	0 2	0 3	0 10	0 2	0 1
tig00000650	1604443	AAAAA	TTGAG	0 0	0 0	0 0	0 0	0 0	0 0	0 0	0 0	0 0	0 0	0 0	0 0	0 0	0 0	0 0	0 0	0 0	0 0	0 0	0 5	0 0	0 0	0 0	0 0	0 0	0 0	0 0	0 0	0 0	0 0	0 0	0 0	0 0	0 0	0 0	0 0	0 0	0 0	0 0	0 0	0 0	0 0	0 0	0 0	0 0	0 0
tig00000650	1604445	AAA	GAG	0 0	0 0	0 0	0 0	0 0	0 0	0 0	0 0	0 0	0 0	2 0	0 0	0 0	2 0	0 0	0 0	0 0	0 0	0 0	0 5	0 0	0 0	0 0	0 0	0 0	1 0	4 0	0 0	3 0	5 0	0 0	0 0	0 0	0 0	0 0	0 0	0 0	0 0	0 0	0 0	0 0	0 0	0 0	0 0	0 0	0 0
tig00000650	1604447	A	G	0 0	0 0	0 0	0 0	0 0	0 0	0 0	0 0	0 0	0 0	0 0	0 0	0 0	0 0	0 0	0 0	0 0	0 0	1 0	0 5	0 0	0 0	0 0	0 0	0 0	0 0	0 0	0 0	0 0	0 0	0 0	0 0	0 0	0 0	0 0	0 0	1 0	1 0	1 0	0 0	1 0	2 0	2 0	10 0	2 0	1 0
tig00000650	1604452	AATTTAATATAAATCAGT	GATTA	0 0	0 0	0 0	0 0	0 0	0 0	0 0	0 0	0 0	0 0	2 0	0 0	0 0	1 0	0 0	0 0	0 0	0 0	0 0	0 6	0 0	0 0	0 0	0 0	0 0	1 0	3 0	0 0	3 0	5 0	0 0	0 0	0 0	0 0	0 0	0 0	0 0	0 0	0 0	0 0	0 0	0 0	0 0	0 0	0 0	0 0
tig00000650	1604452	AATTTAATATAAATCAGT	GATTTAATATGAACCAGTA	0 0	0 0	0 0	0 0	0 0	0 0	0 0	0 0	0 0	0 0	0 0	0 0	0 0	0 0	0 0	0 0	0 0	0 0	0 0	0 6	0 0	0 0	0 0	0 0	0 0	0 0	0 0	0 0	0 0	0 0	0 0	0 0	0 0	0 0	0 0	0 0	0 0	0 0	0 0	0 0	1 0	0 0	2 0	0 0	0 0	1 0
tig00000650	1604472	A	AAT	0 0	0 0	0 0	0 0	0 0	0 0	0 0	0 0	0 0	0 0	0 0	0 0	0 0	0 0	0 0	0 0	0 0	0 0	0 0	0 6	0 0	0 0	0 0	0 0	0 0	0 0	0 0	0 0	0 0	0 0	0 0	0 0	0 0	0 0	0 0	0 0	0 0	0 0	0 0	0 0	0 0	0 0	0 0	0 0	0 0	0 0
tig00000650	1604477	A	G	0 0	0 0	0 0	0 0	0 0	0 0	0 0	0 0	0 0	0 0	0 2	0 0	0 0	0 5	0 0	0 1	0 0	0 0	0 0	0 8	0 0	0 0	0 0	0 0	0 0	0 1	0 4	0 0	0 3	0 7	0 1	0 1	0 0	0 0	0 0	0 0	0 0	0 0	0 1	0 0	0 1	0 0	0 2	0 5	0 0	0 1
tig00000650	1604478	GGTTGATC	ATTTTATT	0 0	0 0	0 0	0 0	0 0	0 0	0 0	0 0	0 0	0 0	0 2	0 0	0 0	0 5	0 0	0 1	0 0	0 0	0 0	0 8	0 0	0 0	0 0	0 0	0 0	0 1	0 4	0 0	0 3	0 5	0 0	0 0	0 0	0 0	0 0	0 0	0 0	0 0	1 0	0 0	1 0	0 0	2 0	5 0	0 0	1 0
tig00000650	1604482	G	A	0 0	0 0	0 0	0 0	0 0	0 0	0 0	0 0	0 0	0 0	0 2	0 0	0 0	0 5	0 0	0 1	0 0	0 0	0 0	0 8	0 0	0 0	0 0	0 0	0 0	0 1	0 4	0 0	0 3	2 5	0 0	0 0	0 0	0 0	0 0	0 0	0 0	0 0	0 0	0 0	0 0	0 0	0 0	0 0	0 0	0 0
tig00000650	1604485	C	G	0 0	0 0	0 0	0 0	0 0	0 0	0 0	0 0	0 0	0 0	0 2	0 0	0 0	0 5	0 0	0 1	0 0	0 0	0 0	0 8	0 0	0 0	0 0	0 0	0 0	0 1	0 4	0 0	0 3	0 5	0 0	0 0	0 0	0 0	0 0	0 0	0 0	0 0	0 0	0 0	0 0	0 0	0 0	0 0	0 0	0 0
tig00000650	1604491	CG	TC	0 0	0 0	0 0	0 0	0 0	0 0	0 0	0 0	0 0	0 0	0 0	0 0	0 0	0 0	0 0	0 0	0 0	0 0	0 0	0 5	0 0	0 0	0 0	0 0	0 0	0 0	0 0	0 0	0 0	0 0	0 0	0 0	0 0	0 0	0 0	0 0	0 0	0 0	0 0	0 0	0 0	0 0	0 0	0 0	0 0	0 0
tig00000650	1604492	G	C	0 0	0 0	0 0	0 0	0 0	0 0	0 0	0 0	0 0	0 0	0 0	0 0	0 0	0 0	0 0	0 0	0 0	0 0	0 0	0 5	0 0	0 0	1 0	0 0	0 0	0 0	0 0	0 0	0 0	2 0	0 0	1 0	0 0	0 0	0 0	0 0	0 0	0 0	1 0	0 0	1 0	0 0	2 0	0 0	0 0	1 0
tig00000650	1604492	GC	CT	0 0	0 0	0 0	0 0	0 0	0 0	0 0	0 0	0 0	0 0	2 0	0 0	0 0	5 0	0 0	1 0	0 0	0 0	0 0	0 5	0 0	0 0	0 0	0 0	0 0	1 0	4 0	0 0	4 0	5 0	0 0	0 0	0 0	0 0	0 0	0 0	0 0	0 0	0 0	0 0	0 0	0 0	0 0	0 0	0 0	0 0
tig00000650	1604497	CAATATAGA	TAACAAAAG	0 0	0 0	0 0	0 0	0 0	0 0	0 0	0 0	0 0	0 0	0 0	0 0	0 0	0 5	0 0	0 1	0 0	0 0	0 0	0 5	0 0	0 0	0 0	0 0	0 0	0 1	0 2	0 0	0 3	0 5	0 0	0 0	0 0	0 0	0 0	0 0	0 0	0 0	1 0	0 0	1 0	0 0	2 0	5 0	0 0	1 0
tig00000650	1604497	CAATATAGA	TAATATATG	0 0	0 0	0 0	0 0	0 0	0 0	0 0	0 0	0 0	0 0	0 0	0 0	0 0	0 5	0 0	0 1	0 0	0 0	0 0	0 5	0 0	0 0	1 0	0 0	0 0	0 1	0 2	0 0	0 3	2 5	0 0	0 0	0 0	0 0	0 0	0 0	0 0	0 0	0 0	0 0	0 0	0 0	0 0	0 0	0 0	0 0
tig00000650	1604504	G	A	0 0	0 0	0 0	0 0	0 0	0 0	0 0	0 0	0 0	0 0	0 0	0 0	0 0	0 5	0 0	0 1	0 0	0 0	0 0	0 5	0 0	0 0	0 0	0 0	0 0	0 1	0 2	0 0	0 3	0 5	0 0	0 0	0 0	0 0	0 0	0 0	0 0	0 0	0 0	0 0	0 0	0 0	0 0	0 0	0 0	0 0
tig00000650	1604510	A	ATCCT	0 0	0 0	0 0	0 0	0 0	0 0	0 0	0 0	0 0	0 0	0 0	0 0	0 0	0 0	0 0	0 0	0 0	0 0	0 0	0 4	0 0	0 1	0 1	0 0	0 0	0 0	0 4	0 0	0 2	0 7	0 0	0 0	0 0	0 0	0 0	0 0	0 0	0 0	0 1	0 0	0 1	0 0	0 4	0 5	0 0	0 4
tig00000650	1604521	AGTTTTTTTTC	GGTGTTTTTTT	0 0	0 0	0 0	0 0	0 0	0 0	0 0	0 0	0 0	0 0	0 0	0 0	0 0	0 0	0 0	0 0	0 0	0 0	0 0	0 6	0 0	0 0	0 0	0 0	0 0	0 0	0 0	0 0	0 0	4 0	0 0	0 0	0 0	0 0	0 0	0 0	0 0	0 0	0 0	0 0	0 0	0 0	0 0	0 0	0 0	0 0
tig00000650	1604521	AG	GTTGGTT	0 0	0 0	0 0	0 0	0 0	0 0	0 0	0 0	0 0	0 0	0 0	0 0	0 0	0 0	0 0	0 0	0 0	0 0	0 0	0 6	0 0	0 0	0 0	0 0	0 0	0 0	0 0	0 0	0 0	0 0	0 0	0 0	0 0	0 0	0 0	0 0	0 0	0 0	0 0	0 0	0 0	0 0	0 0	0 0	0 0	0 0
tig00000650	1604521	AGTTTTTTTT	GTTTTTTTTC	0 0	0 0	0 0	0 0	0 0	0 0	0 0	0 0	0 0	0 0	0 0	0 0	0 0	0 0	0 0	0 0	0 0	0 0	0 0	0 6	0 0	0 0	0 0	0 0	0 0	0 0	0 0	0 0	0 0	0 0	0 0	0 0	0 0	0 0	0 0	0 0	0 0	0 0	1 0	0 0	1 0	0 0	2 0	0 0	0 0	4 0
tig00000650	1604552	A	AT	0 0	0 0	0 0	0 0	0 0	0 0	0 0	0 0	0 0	0 0	0 0	0 0	0 0	0 0	0 0	0 0	0 0	0 0	0 0	0 7	0 0	0 0	0 1	0 0	0 0	0 0	0 0	0 0	0 0	0 5	0 0	0 0	4 0	0 0	0 0	0 0	0 0	0 1	0 1	0 0	0 1	0 0	0 4	1 0	0 0	0 5
tig00000650	1604553	TTT	CGTTG	0 0	0 0	0 0	0 0	0 0	0 0	0 0	0 0	0 0	0 0	0 0	0 0	0 0	0 0	0 0	0 0	0 0	0 0	0 0	0 7	0 0	0 0	0 1	0 0	0 0	0 0	0 0	0 0	0 0	0 5	0 0	0 0	0 0	0 0	0 0	0 0	0 0	0 1	0 1	0 0	0 1	0 0	0 4	0 0	0 0	0 5
tig00000650	1604555	TTTTTA	GTTTTT	0 0	0 0	0 0	0 0	0 0	0 0	0 0	0 0	0 0	0 0	0 0	0 0	0 0	0 0	0 0	0 0	0 0	0 0	0 0	0 7	0 0	0 0	0 1	0 0	0 0	0 0	0 0	0 0	0 0	0 5	0 0	0 0	0 0	0 0	0 0	0 0	0 0	0 1	0 1	0 0	0 1	0 0	0 4	0 0	0 0	0 5
tig00000650	1604575	A	G	0 0	0 0	0 0	0 0	0 0	0 0	0 0	0 0	0 0	0 0	0 0	0 0	0 0	0 0	0 0	1 0	0 0	0 0	0 0	0 10	0 0	0 1	1 1	0 0	0 0	0 0	0 1	0 0	0 2	5 0	10 0	4 0	4 0	0 0	0 0	0 0	0 0	0 1	0 1	0 0	0 0	0 0	0 5	2 0	0 0	0 5
tig00000650	1604577	TTTAAGATGGA	T	0 0	0 0	0 0	0 0	0 0	0 0	0 0	0 0	0 0	0 0	0 0	0 0	0 0	0 0	0 0	0 1	0 0	0 0	0 0	0 10	0 0	0 0	0 0	0 0	0 0	0 0	0 0	0 0	0 0	0 0	0 0	0 0	0 0	0 0	0 0	0 0	0 0	1 0	1 0	0 0	0 0	0 0	3 2	0 0	0 0	2 0
tig00000650	1604582	G	A	0 0	0 0	0 0	0 0	0 0	0 0	0 0	0 0	0 0	0 0	0 0	0 0	0 0	0 0	0 0	0 1	0 0	0 0	0 0	0 10	0 0	0 0	0 0	0 0	0 0	0 0	0 0	0 0	0 0	4 0	3 0	6 0	0 0	0 0	0 0	0 0	0 0	0 0	0 0	0 0	0 0	0 0	0 2	0 0	0 0	0 0
tig00000650	1604582	GATG	AATA	0 0	0 0	0 0	0 0	0 0	0 0	0 0	0 0	0 0	0 0	0 0	0 0	0 0	0 0	0 0	0 1	0 0	0 0	0 0	0 10	0 0	0 0	0 0	0 0	0 0	0 0	0 0	0 0	0 0	0 0	7 0	0 0	0 0	0 0	0 0	0 0	0 0	0 0	0 0	0 0	0 0	0 0	0 2	0 0	0 0	0 0
tig00000650	1604582	GA	AG	0 0	0 0	0 0	0 0	0 0	0 0	0 0	0 0	0 0	0 0	0 0	0 0	0 0	0 0	0 0	0 1	0 0	0 0	0 0	0 10	0 0	0 0	0 0	0 0	0 0	0 0	0 0	0 0	0 0	0 0	0 0	0 0	0 0	0 0	0 0	0 0	0 0	0 0	0 0	0 0	0 0	0 0	0 2	0 0	0 0	0 0
tig00000650	1604585	GG	AA	0 0	0 0	0 0	0 0	0 0	0 0	0 0	0 0	0 0	0 0	0 0	0 0	0 0	0 0	0 0	0 1	0 0	0 0	0 0	0 10	0 0	1 0	1 0	0 0	0 0	0 0	1 0	0 0	2 0	0 0	0 0	0 0	0 0	0 0	0 0	0 0	0 0	0 0	0 0	0 0	0 0	0 0	0 2	2 0	0 0	0 0
tig00000650	1604592	T	A	0 0	0 0	0 0	0 0	0 0	0 0	0 0	0 0	0 0	0 0	0 0	0 0	0 0	0 0	0 0	0 0	0 0	0 0	0 0	0 10	0 0	0 0	0 0	0 0	0 0	0 0	0 0	0 0	0 0	0 0	0 0	0 0	0 0	0 0	0 0	0 0	0 0	0 0	1 0	0 0	0 0	0 0	3 0	0 0	0 0	2 0
tig00000650	1604592	T	C	0 0	0 0	0 0	0 0	0 0	0 0	0 0	0 0	0 0	0 0	1 0	0 0	0 0	0 0	0 0	1 0	0 0	0 0	0 0	0 10	0 0	1 0	1 0	1 0	0 0	0 0	1 0	1 0	2 0	4 0	11 0	8 0	4 0	0 0	0 0	0 0	0 0	0 0	0 0	0 0	0 0	0 0	0 0	1 0	0 0	0 0
tig00000650	1604592	TATGAGT	CA	0 0	0 0	0 0	0 0	0 0	0 0	0 0	0 0	0 0	0 0	0 0	0 0	0 0	0 0	0 0	0 0	0 0	0 0	0 0	0 10	0 0	0 0	0 0	0 0	0 0	0 0	0 0	0 0	0 0	0 0	0 0	0 0	0 0	0 0	0 0	0 0	0 0	0 0	0 0	0 0	0 0	0 0	0 0	0 0	0 0	0 0
tig00000650	1604600	GAGCTATTTAATTCGTGACTTAAAACTTA	AAGCTAATTCGTGACTTAAAACTTG	0 0	0 0	0 0	0 0	0 0	0 0	0 0	0 0	0 0	0 0	0 0	0 0	0 0	0 0	0 0	0 0	0 0	0 0	0 0	0 8	0 0	1 0	3 0	0 0	0 0	0 0	1 0	1 0	2 0	0 0	0 0	0 0	0 0	0 0	0 0	0 0	0 0	0 0	0 0	0 0	0 0	0 0	0 0	0 0	0 0	0 0
tig00000650	1604634	AG	GA	0 0	0 0	0 0	0 0	0 0	0 0	0 0	0 0	0 0	0 0	4 0	0 0	0 0	0 0	1 0	0 0	0 0	0 0	0 0	0 10	0 0	0 0	0 0	0 0	0 0	0 0	1 0	0 0	1 0	0 0	0 0	0 0	0 0	0 0	0 0	0 0	0 0	0 0	0 0	0 0	0 0	0 0	0 0	0 0	0 0	0 0
tig00000650	1604643	C	T	0 3	0 5	0 5	0 7	0 9	0 10	0 12	0 4	0 7	0 10	0 2	0 2	0 1	0 3	0 1	0 4	0 8	0 4	0 3	0 7	1 1	2 1	5 0	0 2	0 7	0 3	1 0	1 0	3 0	0 1	0 10	0 7	0 4	0 0	0 0	0 0	0 0	0 1	0 1	0 0	0 0	0 0	0 3	0 0	0 0	0 2
tig00000650	1604645	G	A	0 3	0 5	0 5	0 7	0 9	0 10	0 12	0 4	0 7	0 10	0 2	0 2	0 1	0 3	0 1	0 4	0 8	0 4	0 3	0 7	0 1	0 1	0 0	0 2	0 7	0 3	0 0	0 0	0 0	0 1	0 10	0 7	0 4	0 0	0 0	0 0	0 0	0 1	0 1	0 0	0 0	0 0	0 3	0 0	0 0	0 2
tig00000650	1604645	GAGTC	AAGTT	0 3	0 5	0 5	0 7	0 9	0 10	0 12	0 4	0 7	0 10	0 2	0 2	0 1	0 3	0 1	0 4	0 8	0 4	0 3	0 7	0 1	0 1	0 0	0 2	0 7	0 3	0 0	0 0	0 0	0 1	0 10	8 7	0 4	0 0	0 0	0 0	0 0	0 1	0 1	0 0	0 0	0 0	0 3	0 0	0 0	0 2
tig00000650	1604647	G	A	0 3	0 5	0 5	0 7	0 9	0 10	0 12	0 4	0 7	0 10	0 2	0 2	0 1	7 3	0 1	2 4	0 8	0 4	0 3	0 7	0 1	0 1	0 0	0 2	0 7	4 3	0 0	0 0	0 0	0 1	5 10	0 7	0 4	0 0	0 0	0 0	0 0	0 1	0 1	0 0	0 0	0 0	0 3	0 0	0 0	0 2
tig00000650	1604652	GTTT	ATTG	3 0	5 0	5 0	7 0	9 0	9 0	12 0	4 0	7 0	10 0	2 4	2 0	1 0	3 7	1 1	4 3	8 0	4 0	3 2	0 7	1 1	1 4	0 5	2 0	7 0	3 4	0 3	0 1	0 4	1 0	10 6	6 8	4 0	0 0	0 0	0 0	0 0	0 1	0 1	0 0	0 0	0 0	0 3	0 2	0 0	0 2
tig00000650	1604661	C	T	0 3	0 5	0 5	0 7	0 9	0 10	0 12	0 4	0 7	0 10	4 2	0 2	0 1	7 3	0 1	1 4	0 8	0 4	0 3	0 7	0 1	0 1	0 0	0 2	0 7	0 3	1 0	0 0	1 0	0 1	3 10	0 14	0 4	0 0	0 0	0 0	0 0	0 0	0 0	0 0	0 0	0 0	0 0	2 0	0 0	0 0
tig00000650	1604662	C	A	0 3	0 5	0 5	0 7	0 9	0 10	0 12	0 4	0 7	0 10	0 2	0 2	0 1	0 3	0 1	0 4	0 8	0 4	2 3	0 7	1 1	4 1	4 0	0 2	0 7	0 3	2 0	1 0	3 0	0 1	0 10	0 14	0 4	0 0	0 0	0 0	0 0	0 0	0 0	0 0	0 0	0 0	0 0	0 0	0 0	0 0
tig00000650	1604668	CT	TC	0 0	0 0	0 0	0 0	0 0	0 0	0 0	0 0	0 0	0 0	0 0	0 0	0 0	0 0	0 0	0 0	0 0	0 0	0 0	0 7	0 0	0 0	0 0	0 0	0 0	0 0	0 0	0 0	0 0	0 0	3 0	0 0	0 0	0 0	0 0	0 0	0 0	0 0	0 0	0 0	0 0	0 0	0 0	0 0	0 0	0 0
tig00000650	1604668	CTAAG	TCAAA	0 0	0 0	0 0	0 0	0 0	0 0	0 0	0 0	0 0	0 0	0 0	0 0	0 0	0 0	0 0	0 0	0 0	0 0	0 0	0 7	0 0	0 0	0 0	0 0	0 0	0 0	0 0	0 0	0 0	0 0	0 0	0 0	0 0	0 0	0 0	0 0	0 0	0 0	0 0	0 0	0 0	0 0	0 0	0 0	0 0	0 0
tig00000650	1604669	T	C	2 0	4 0	4 0	6 0	8 0	10 0	11 0	4 0	7 0	10 0	6 0	2 0	1 0	10 0	2 0	5 0	7 0	4 0	4 0	0 7	2 0	3 0	4 0	2 0	6 0	7 0	1 0	1 0	3 0	1 0	9 0	11 0	0 0	0 0	0 0	0 0	0 0	0 0	1 0	0 0	0 0	0 0	3 0	1 0	0 0	2 0
tig00000650	1604669	TA	C	0 0	0 0	0 0	0 0	0 0	0 0	0 0	0 0	0 0	0 0	0 0	0 0	0 0	0 0	0 0	0 0	0 0	0 0	0 0	0 7	0 0	0 0	0 0	0 0	0 0	0 0	0 0	0 0	0 0	0 0	0 0	0 0	4 0	0 0	0 0	0 0	0 0	0 0	0 0	0 0	0 0	0 0	0 0	0 0	0 0	0 0
tig00000650	1604677	T	TTGAAC	0 2	0 5	0 5	0 7	0 9	0 10	0 12	0 4	0 7	0 10	0 6	0 2	0 1	0 3	0 1	0 4	0 7	0 4	0 5	0 6	0 2	0 4	0 4	0 2	0 7	0 3	0 2	0 1	0 2	0 1	0 12	0 4	0 4	0 0	0 0	0 0	0 0	0 1	0 1	0 0	0 0	0 0	0 3	0 1	0 0	0 2
tig00000650	1604683	C	T	0 2	0 5	0 5	0 7	0 9	0 10	0 12	0 4	0 7	0 10	0 6	0 2	0 1	8 3	1 1	4 4	0 7	0 4	0 5	0 6	0 2	0 4	0 4	0 2	0 7	4 3	0 2	0 1	0 2	0 1	0 12	0 4	0 4	0 0	0 0	0 0	0 0	0 1	0 1	0 0	0 0	0 0	0 3	0 1	0 0	0 2
tig00000650	1604684	G	C	0 3	0 5	0 5	0 7	0 9	0 10	0 12	0 4	0 7	0 10	0 6	0 2	0 1	0 12	0 2	0 8	0 8	0 4	0 5	0 6	0 2	0 4	0 3	0 2	0 7	0 7	0 2	0 1	0 1	0 1	0 12	0 4	4 0	0 0	0 0	0 0	0 0	0 1	0 1	0 0	0 0	0 0	0 3	0 1	0 0	0 2
tig00000650	1604685	T	C	0 3	0 5	0 5	0 7	0 9	0 10	0 12	0 4	0 7	0 10	0 6	0 2	0 1	0 12	0 2	0 8	0 8	0 4	0 5	0 6	0 2	0 4	0 3	0 2	0 7	0 7	0 2	0 1	0 1	0 1	0 12	0 3	0 4	0 0	0 0	0 0	0 0	0 1	0 1	0 0	0 0	0 0	0 3	0 1	0 0	2 0
tig00000650	1604688	C	T	0 3	0 5	0 5	0 6	0 9	0 10	0 12	0 4	0 7	0 10	0 6	0 2	0 1	0 12	0 2	0 4	0 8	0 4	0 5	0 5	0 2	0 4	0 3	0 2	0 7	0 8	0 2	0 1	0 1	0 1	0 11	0 3	0 4	0 0	0 0	0 0	0 0	0 1	0 1	0 0	0 0	0 0	0 3	0 1	0 0	0 2
tig00000650	1604690	AA	TG	0 3	0 5	0 5	0 7	0 9	0 9	0 10	0 4	0 7	0 8	0 5	0 2	0 1	0 12	0 2	0 9	0 5	0 3	0 4	0 5	0 2	0 4	0 2	0 2	0 6	0 8	0 2	0 0	0 1	0 1	0 10	0 3	0 4	0 0	0 0	0 0	0 0	0 1	0 1	0 0	0 0	0 0	0 3	0 1	0 0	0 2
tig00000650	1604698	T	C	1 0	4 0	4 0	7 0	6 0	8 0	8 0	4 0	6 0	5 0	4 0	1 0	0 0	3 9	1 1	4 5	5 0	2 0	2 0	0 5	2 0	3 0	0 0	0 0	3 0	2 5	2 0	0 0	1 0	0 0	10 0	2 0	4 0	0 0	0 0	0 0	0 0	1 0	1 0	0 0	0 0	0 0	3 0	1 0	0 0	1 0
tig00000650	1604710	G	C	0 1	0 3	0 1	0 5	0 3	0 5	0 5	0 4	0 3	0 1	0 2	0 1	0 0	0 9	0 0	0 6	0 3	0 1	0 0	0 3	0 2	0 1	0 0	0 0	0 1	0 6	0 2	0 0	0 0	0 0	5 3	1 1	0 4	0 0	0 0	0 0	0 0	0 0	0 1	0 0	0 0	0 0	0 1	0 1	0 0	0 1
tig00000650	1604718	AAT	A	0 0	0 0	0 0	0 0	0 0	0 0	0 0	0 0	0 0	0 0	0 0	0 0	0 0	1 0	0 0	1 0	0 0	0 0	0 0	0 3	0 0	0 0	0 0	0 0	0 0	0 0	0 0	0 0	0 0	0 0	0 0	0 0	0 0	0 0	0 0	0 0	0 0	0 0	0 0	0 0	0 0	0 0	0 0	0 0	0 0	0 0
tig00000650	1604719	A	C	0 0	0 0	0 0	0 0	0 0	0 0	0 0	0 0	0 0	0 0	0 0	0 0	0 0	3 0	0 0	0 0	0 0	0 0	0 0	0 3	0 0	0 0	0 0	0 0	0 0	1 0	0 0	0 0	0 0	0 0	4 0	2 0	4 0	0 0	0 0	0 0	0 0	0 0	0 0	0 0	0 0	0 0	0 0	0 0	0 0	0 0
tig00000650	1604725	CT	C	0 0	0 0	0 0	0 0	0 0	0 0	0 0	0 0	0 0	0 0	0 0	0 0	0 0	0 0	0 0	0 0	0 0	0 0	0 0	0 2	0 0	0 0	0 0	0 0	0 0	0 0	0 0	0 0	0 0	0 0	0 0	1 0	4 0	0 0	0 0	0 0	0 0	0 0	0 0	0 0	0 0	0 0	0 0	0 0	0 0	0 0
tig00000650	1604778	A	G	0 2	0 1	0 0	0 1	0 1	0 1	0 3	0 3	0 4	0 3	0 1	0 1	0 1	0 3	0 0	0 1	0 0	0 0	0 1	0 5	0 2	0 1	0 1	0 0	0 1	0 2	0 0	0 1	0 0	0 0	0 0	0 2	0 0	0 0	0 0	0 0	0 0	0 0	0 0	0 0	0 0	0 0	0 0	0 0	0 0	0 0
tig00000650	1604806	T	A	0 2	0 0	0 0	0 1	0 1	0 1	0 1	0 2	0 4	0 2	0 1	0 1	0 1	0 1	0 0	0 0	0 0	0 0	0 1	0 6	0 2	0 1	0 1	0 0	0 1	0 1	0 0	0 1	0 0	0 0	0 0	4 0	0 0	0 0	0 0	0 0	0 0	0 0	0 0	0 0	0 0	0 0	0 0	0 0	0 0	0 0
tig00000650	1604806	T	C	0 2	0 0	0 0	0 1	0 1	0 1	0 1	0 2	0 4	0 2	0 1	0 1	0 1	0 1	0 0	0 0	0 0	0 0	0 1	0 6	0 2	0 1	0 1	0 0	0 1	0 1	0 0	0 1	0 0	0 0	0 0	0 0	0 0	0 0	0 0	0 0	0 0	0 0	0 0	0 0	0 0	0 0	0 0	0 0	0 0	0 0
tig00000650	1604825	G	A	0 0	0 0	0 0	0 0	0 0	0 0	0 0	0 0	0 0	1 0	0 0	0 0	0 0	0 0	0 0	0 0	0 0	0 0	0 0	0 5	0 0	1 0	1 0	0 0	0 0	0 0	0 0	0 0	0 0	0 0	0 0	4 0	0 0	0 0	0 0	0 0	0 0	0 0	0 0	0 0	0 0	0 0	0 0	1 0	0 0	0 0
tig00000650	1604833	G	C	0 0	0 0	0 0	0 0	0 0	0 0	0 0	0 0	0 0	1 0	0 0	0 0	0 0	0 0	0 0	0 0	0 0	0 0	0 0	0 5	0 0	0 0	0 0	0 0	0 0	0 0	0 0	0 0	0 0	0 0	0 0	4 0	0 0	0 0	0 0	0 0	0 0	0 0	0 0	1 0	0 0	0 0	0 0	1 0	0 0	3 0
tig00000650	1604844	GTAC	G	0 2	0 0	0 0	0 1	0 3	0 1	0 3	0 3	0 1	0 6	0 0	0 0	0 0	0 1	0 4	0 0	0 0	0 1	0 1	0 7	0 1	0 0	0 2	0 0	0 1	0 2	0 1	0 0	0 0	0 0	0 0	0 2	0 0	0 0	0 1	0 0	0 0	0 0	0 0	0 1	0 0	0 0	0 0	0 1	0 1	0 3
tig00000650	1604886	T	G	0 6	0 1	0 2	0 12	0 12	0 7	0 14	0 8	0 4	0 14	0 7	0 1	0 3	0 6	0 4	0 6	0 4	0 6	0 6	0 5	0 3	0 4	0 8	0 5	0 7	0 9	0 5	0 0	0 3	0 3	0 0	0 1	0 0	0 3	0 1	0 0	0 0	0 0	0 1	0 4	0 1	0 3	0 2	0 6	0 2	0 6
tig00000650	1604896	G	T	6 0	2 0	2 0	12 0	13 0	7 0	15 0	10 0	6 0	14 0	7 0	2 0	3 0	7 0	4 0	8 0	4 0	6 0	3 4	0 6	1 2	3 1	6 5	5 0	9 0	10 0	3 2	0 0	2 1	3 0	0 0	0 1	0 0	0 4	0 1	0 0	0 0	0 0	0 1	0 4	0 1	0 3	0 2	0 6	0 2	0 7
tig00000650	1604909	A	G	0 6	0 2	0 2	0 12	0 13	0 7	0 14	0 10	0 6	0 15	0 7	0 2	0 3	0 7	0 4	0 8	0 4	0 6	0 6	0 7	0 3	0 4	0 10	0 5	0 9	0 10	0 5	0 1	0 3	0 3	0 1	0 1	0 0	0 4	0 1	0 0	0 0	0 1	0 1	0 4	0 1	0 4	0 2	0 6	0 3	0 7
tig00000650	1604916	A	G	0 6	0 2	0 2	0 12	0 13	0 7	0 13	0 10	0 6	0 15	0 7	0 2	0 3	0 7	0 4	0 8	0 4	0 6	0 6	0 7	0 3	0 4	0 10	0 5	0 9	0 10	0 5	0 1	0 3	0 3	0 1	0 1	0 0	0 4	0 1	0 0	0 0	0 1	0 1	0 5	0 1	0 4	0 4	0 5	0 3	0 7
tig00000650	1604922	A	ATC	0 6	0 2	0 2	0 12	0 13	0 6	0 13	0 10	0 6	0 15	0 7	0 2	0 3	0 7	0 4	0 8	0 4	0 6	0 6	0 8	0 3	0 4	0 10	0 5	0 9	0 10	0 5	0 1	0 3	0 3	0 3	0 0	0 0	0 4	0 1	0 0	0 0	0 1	0 1	0 5	0 1	0 4	0 4	0 5	0 3	0 5
tig00000650	1604936	T	C	0 6	0 2	0 2	0 12	0 10	0 7	0 13	0 9	0 5	0 14	0 7	0 2	0 3	0 7	0 3	0 8	0 4	0 5	0 6	0 8	0 3	0 4	0 9	0 5	0 8	0 10	0 5	0 1	0 3	0 3	0 8	0 4	0 0	0 4	0 0	0 0	0 0	0 1	0 1	0 6	0 0	0 6	0 4	0 6	0 6	0 6
tig00000650	1604947	T	TGGTG	0 3	0 2	0 2	0 8	0 9	0 5	0 7	0 6	0 4	0 9	0 4	0 0	0 2	0 6	0 0	0 8	0 2	0 4	0 4	0 9	0 1	0 1	0 7	0 4	0 7	0 7	0 2	0 1	0 1	0 3	0 8	0 4	0 1	0 1	0 0	0 0	0 0	0 1	0 1	0 6	0 0	0 6	0 4	0 6	0 6	0 7
tig00000650	1604950	T	C	0 3	0 2	0 2	0 8	0 9	0 5	0 7	0 6	0 4	0 9	0 4	0 0	0 2	0 6	0 0	0 8	0 2	0 4	0 4	0 9	0 1	0 1	0 7	0 4	0 7	0 7	0 2	0 1	0 1	0 3	0 8	0 4	0 1	0 1	0 0	0 0	0 0	0 1	0 1	0 6	0 0	0 6	0 4	0 6	0 6	0 7
tig00000650	1604956	A	AGGC	0 3	0 2	0 2	0 8	0 8	0 5	0 6	0 6	0 4	0 8	0 3	0 1	0 1	0 6	0 0	0 8	0 2	0 3	0 4	0 9	0 1	0 1	0 6	0 4	0 7	0 6	0 1	0 1	0 1	0 3	0 9	0 4	0 1	0 2	0 0	0 0	0 0	0 1	0 1	0 6	0 0	0 6	0 4	0 6	0 6	0 7
tig00000650	1604956	A	AT	0 3	0 2	0 2	0 8	0 8	0 5	0 6	0 6	0 4	0 8	0 3	0 1	0 1	0 6	0 0	0 8	0 2	0 3	0 4	0 9	0 1	0 1	0 6	0 4	0 7	0 6	0 1	0 1	0 1	0 3	0 9	0 4	0 1	0 2	0 0	0 0	0 0	0 1	0 1	0 6	0 0	0 6	0 4	0 6	0 6	0 7
tig00000650	1604961	T	G	3 0	2 0	1 0	8 0	5 0	5 0	5 0	5 0	4 0	6 0	3 0	1 0	1 0	5 0	0 0	8 0	2 0	2 0	2 2	0 7	0 1	1 0	3 3	3 0	7 0	6 0	1 0	0 1	0 0	2 1	9 0	3 1	0 1	0 4	0 0	0 0	0 0	0 1	0 1	0 6	0 0	0 6	0 4	0 7	0 6	0 6
tig00000650	1604975	C	T	0 1	0 1	0 0	0 2	0 5	0 3	0 3	0 3	0 3	0 3	0 2	0 1	0 0	0 2	0 0	0 7	0 2	0 0	0 1	0 5	0 0	0 1	0 3	0 0	0 4	0 1	0 0	0 1	0 2	0 2	0 11	0 13	0 1	0 4	0 0	0 0	0 0	0 1	0 1	0 6	0 0	0 6	0 4	0 5	0 6	0 7
tig00000650	1604984	C	A	1 0	1 0	2 0	2 0	3 0	5 0	4 0	6 0	4 0	3 0	2 0	1 0	1 0	4 0	1 0	7 0	3 0	0 0	3 0	0 5	0 1	1 0	2 0	0 0	3 0	6 0	2 0	1 1	3 1	0 1	9 3	8 5	0 1	0 4	0 0	0 0	0 0	0 1	0 0	0 5	0 0	0 6	0 4	0 5	0 5	0 6
tig00000650	1605000	G	C	0 4	0 0	0 2	0 3	0 6	0 4	0 3	0 8	0 2	0 5	0 1	0 0	0 1	0 4	0 2	0 6	0 3	0 1	0 5	0 7	0 3	0 2	0 2	0 0	0 4	0 10	0 2	0 1	0 4	0 4	0 12	0 14	0 2	0 4	0 0	0 0	0 0	0 1	0 0	0 5	0 0	0 6	0 5	0 6	0 4	0 6
tig00000650	1605010	G	A	0 6	0 0	0 3	0 8	0 9	0 6	0 7	0 9	0 4	0 8	0 3	0 0	0 2	0 6	0 2	0 7	0 4	0 1	0 10	0 9	0 4	0 2	0 2	0 2	0 5	0 10	0 4	0 2	0 5	0 4	0 13	0 14	0 2	0 4	0 0	0 0	0 0	0 1	0 0	0 4	0 0	0 6	0 5	0 6	0 4	0 5
tig00000650	1605012	C	T	6 0	1 0	3 0	9 0	11 0	6 0	7 0	9 0	4 0	9 0	3 0	0 0	2 0	7 0	2 0	8 0	4 0	1 0	10 0	0 9	3 1	2 0	2 0	2 0	5 0	10 0	4 0	2 0	4 1	3 1	10 3	8 6	0 2	0 4	0 0	0 0	0 0	0 1	0 0	0 4	0 0	0 6	0 5	0 5	0 4	0 5
tig00000650	1605016	A	G	0 6	0 2	0 3	0 9	0 12	0 10	0 8	0 9	0 7	0 10	0 3	0 0	0 2	0 7	0 2	0 8	0 4	0 1	0 12	0 8	1 3	0 2	0 2	0 3	0 6	0 12	0 4	0 2	1 4	1 4	0 14	0 13	0 2	0 4	0 0	0 0	1 0	1 0	0 0	4 0	0 0	6 0	5 0	5 0	4 0	5 0
tig00000650	1605044	A	T	0 10	0 4	0 12	0 22	0 19	0 17	0 12	0 17	0 16	0 21	0 3	0 4	0 5	0 17	0 2	0 19	0 16	0 3	0 15	0 7	1 5	0 3	0 3	0 6	0 16	0 21	0 5	0 3	1 8	1 4	0 10	0 13	0 3	0 4	0 0	0 0	1 0	1 0	0 0	2 0	0 0	3 0	4 0	3 0	3 0	4 0
tig00000650	1605054	GCAAC	ACAAA	10 0	4 0	12 0	22 0	19 0	16 0	11 0	17 0	16 0	21 0	3 0	4 0	5 0	18 0	2 0	19 0	16 0	3 0	14 0	0 7	5 1	3 0	3 0	6 0	16 0	21 0	5 0	3 0	8 1	4 1	7 1	4 2	1 2	0 2	0 0	0 0	0 1	0 0	0 0	0 2	0 0	0 2	0 5	0 3	0 3	0 4
tig00000650	1605076	C	CCCT	0 10	0 4	0 12	0 21	0 18	0 16	0 11	0 16	0 15	0 19	0 2	0 4	0 5	0 17	0 1	0 16	0 14	0 3	0 12	0 8	0 5	0 3	0 3	0 6	0 16	0 19	0 4	0 3	0 6	0 4	1 5	0 3	2 1	0 0	0 0	0 0	1 0	0 0	0 0	0 0	0 0	0 0	3 2	2 0	0 1	2 0
[truncated: 9,279 more rows]
[truncated: 39 more columns]
